# Supplementary material for: Antibody-free profiling of transcription factor occupancy during early embryogenesis by FitCUT&RUN
Source: HighWire-hosted journal article supplement (doi:10.1101/gr.275837.121), 2021-12-29
Supplement: Supplemental_Table_S1.xlsx [file Supplemental_Table_S1.xlsx]

## Sheet: Sheet1
Supplemental Table S1. Sequence of primers and synthetic rFc/3×FLAG used in vector construction.
Name	Sequence (5' to 3')	Note
Rabbit Fc	CCCTCGACATGCAGCAAGCCCATGTGCCCACCCCCTGAACTCCTGGGGGGACCGTCTGTCTTCATCTTCCCCCCAAAACCCAAGGACACCCTCATGATCTCACGCACCCCCGAGGTCACATGCGTGGTGGTGGACGTGAGCCAGGATGACCCCGAGGTGCAGTTCACATGGTACATAAACAACGAGCAGGTGCGCACCGCCCGGCCGCCGCTACGGGAGCAGCAGTTCAACAGCACGATCCGCGTGGTCAGCACCCTCCCCATCGCGCACCAGGACTGGCTGAGGGGCAAGGAGTTCAAGTGCAAAGTCCACAACAAGGCACTCCCGGCCCCCATCGAGAAAACCATCTCCAAAGCCAGAGGGCAGCCCCTGGAGCCGAAGGTCTACACCATGGGCCCT…	Gene synthesis (Genewiz)
G4S3-cla1-F	TGCAGGATCCCATCGATTAGGCGGAGGAGGCTCTGGCGGTGGAGGAAGCG	pcs2-G4S-rFc (ClaI)
G4S3-R	GCTTCCTCCACCTCCGCTTCCTCCACCGCCAG
G4S3-fc-F	CTGGCGGTGGAGGAAGCGGAGGTGGAGGAAGCCCCTCGACATGCAGCAAG
Fc-tga-cla1-R	CTTGAATTCGAATCGATTCATTTACCCGGAGAGCGGGAG
Fc-BamH1-F	TCTTTTTGCAGGATCCATGCCCTCGACATGCAGCAAGCC	pCS2-rFc-G4S (BamHI)
Fc-R	TTTACCCGGAGAGCGGGA
Fc-G4S-F	TCCCGCTCTCCGGGTAAAGGCGGAGGAGGCTCTGGC
G4S-BamH1-R	CGAATCGATGGGATCCATGCTTCCTCCACCTCCGCT
nanog-BamH1-F	TCTTTTTGCAGGATCCATGGCCGATTGGAAAATGCCG	pCS2-nanog-G4S-rFc (BamHI)
nanog-BamH1-R	CTAATCGATGGGATCCCAGCAAAGTTATTCCTTTAG
pou5f3-claI-F	GCATGGATCCCATCGATATGACGGAGAGAGCGCAGA	pCS2-rFc-G4S-pou5f3 (ClaI)
pou5f3-claI-R	CTTGAATTCGAATCGATTTAGCTGGTGAGATGACCCACCA
sox19b-BamH1-F	TCTTTTTGCAGGATCCATGATGTACAGCATGATGGAG	pCS2-sox19b-G4S-rFc (BamHI)
sox19b-BamH1-R	CTAATCGATGGGATCCGATGTGAGTGAGGGGAACAGTT
ATF1-BamH1-F	TCTTTTTGCAGGATCCATGGAAGATTCCCACAAGAG	pCS2-ATF1-G4S-rFc (BamHI)
ATF1-BamH1-R	CTAATCGATGGGATCCAACACTTTTATTGGAATAAAG
ELF1-BamH1-F	TCTTTTTGCAGGATCCATGGCTGCTGTTGTCCAA	pCS2-ELF1-G4S-rFc (BamHI)
ELF1-BamH1-R	CTAATCGATGGGATCCAAAAGAGTTGGGTTCCAGC
G4S-BamHI-F	GGGGCCCCTGGGATCCGGCGGAGGAGGCTCTGGC	pGEX-GST-G4S (BamHI, EcoRI)
G4S-EcoRI-R	GTCGACCCGGGAATTCGCTTCCTCCACCTCCGCT
G4S-BamHI-F	GGGGCCCCTGGGATCCGGCGGAGGAGGCTCTGGC	pGEX-GST-G4S-rFc (BamHI)
Fc-BamHI-R	GTCGACCCGGGAATTCTCATTTACCCGGAGAGCG
CH2-EcoRI-F	TGGAGGAAGCGAATTCCCCCCTGAACTCCTGGGG	pGEX-GST-G4S-480Fc (EcoRI)
CH3-EcoRI-R	GTCGACCCGGGAATTCTCAGTTGTCCTCTGCCTTCCC
CH2-90-EcoRI-F	TGGAGGAAGCGAATTCTGCGTGGTGGTGGACGTG	pGEX-GST-G4S-390Fc (EcoRI)
CH3-EcoRI-R	GTCGACCCGGGAATTCTCAGTTGTCCTCTGCCTTCCC
CH2-90-EcoRI-F	TGGAGGAAGCGAATTCTGCGTGGTGGTGGACGTG	pGEX-GST-G4S-330Fc (EcoRI)
CH3-60-EcoRI-R	GTCGACCCGGGAATTCTCAGTTGATCATGCAGGTCAG
flag-claI-F	TGCAGGATCCCATCGATTCGACGATTACAAGGATGAC	pcs2-G4S-rFc (ClaI)
flag-TGA-claI-R	CTTGAATTCGAATCGATTCACCATGGCTTATCGTCGTCAT
ATF1-BamH1-F	TCTTTTTGCAGGATCCATGGAAGATTCCCACAAGAG	pCS2-ATF1-3×FLAG (BamHI)
ATF1-flag-R	CGAATCGATGGGATCCAACACTTTTATTGGAATAAAG
ELF1-BamH1-F	TCTTTTTGCAGGATCCATGGCTGCTGTTGTCCAA	pCS2-ELF1-3×FLAG (BamHI)
ELF1-flag-R	CGAATCGATGGGATCCAAAAGAGTTGGGTTCCAGC
