# Supplementary material for: Antibody-free profiling of transcription factor occupancy during early embryogenesis by FitCUT&RUN
Source: HighWire-hosted journal article supplement (doi:10.1101/gr.275837.121), 2021-12-29
Supplement: Supplemental_Table_S2.xlsx [file Supplemental_Table_S2.xlsx]

## Sheet: (Fit, FLAG-)CUT&RUN data
Supplemental Table S2. High through-put sequencing data generated in this study.
sample	organism	source	developmental stage	input material	accession number (GSA/GSA-Human)
K562 ATF1 1e5 FItCUT&RUN replicate 1	Homo sapiens	K562	NA	1e5 cells	HRX183129
K562 ATF1 1e5 FItCUT&RUN replicate 2	Homo sapiens	K562	NA	1e5 cells	HRX183130
K562 ATF1 1e5 FItCUT&RUN replicate 3	Homo sapiens	K562	NA	1e5 cells	HRX183131
K562 ATF1 1e4 FItCUT&RUN replicate 1	Homo sapiens	K562	NA	1e4 cells	HRX183132
K562 ATF1 1e4 FItCUT&RUN replicate 2	Homo sapiens	K562	NA	1e4 cells	HRX183133
K562 ATF1 1e4 FItCUT&RUN replicate 3	Homo sapiens	K562	NA	1e4 cells	HRX183134
K562 ATF1 5e3 FItCUT&RUN replicate 1	Homo sapiens	K562	NA	5e3 cells	HRX183135
K562 ATF1 5e3 FItCUT&RUN replicate 2	Homo sapiens	K562	NA	5e3 cells	HRX183136
K562 ATF1 5e3 FItCUT&RUN replicate 3	Homo sapiens	K562	NA	5e3 cells	HRX183137
K562 ELF1 1e5 FItCUT&RUN replicate 1	Homo sapiens	K562	NA	1e5 cells	HRX183138
K562 ELF1 1e5 FItCUT&RUN replicate 2	Homo sapiens	K562	NA	1e5 cells	HRX183139
K562 ELF1 1e5 FItCUT&RUN replicate 3	Homo sapiens	K562	NA	1e5 cells	HRX183140
K562 ELF1 1e4 FItCUT&RUN replicate 1	Homo sapiens	K562	NA	1e4 cells	HRX183141
K562 ELF1 1e4 FItCUT&RUN replicate 2	Homo sapiens	K562	NA	1e4 cells	HRX183142
K562 ELF1 1e4 FItCUT&RUN replicate 3	Homo sapiens	K562	NA	1e4 cells	HRX183143
K562 ELF1 5e3 FItCUT&RUN replicate 1	Homo sapiens	K562	NA	5e3 cells	HRX183144
K562 ELF1 5e3 FItCUT&RUN replicate 2	Homo sapiens	K562	NA	5e3 cells	HRX183145
K562 ELF1 5e3 FItCUT&RUN replicate 3	Homo sapiens	K562	NA	5e3 cells	HRX183146
K562 ATF1 1e5 CUT&RUN replicate 1	Homo sapiens	K562	NA	1e5 cells	HRX332766
K562 ATF1 1e5 CUT&RUN replicate 2	Homo sapiens	K562	NA	1e5 cells	HRX332767
K562 ATF1 1e5 CUT&RUN replicate 3	Homo sapiens	K562	NA	1e5 cells	HRX332768
K562 ATF1 1e5 FLAG-CUT&RUN replicate 1	Homo sapiens	K562	NA	1e5 cells	HRX332769
K562 ATF1 1e5 FLAG-CUT&RUN replicate 2	Homo sapiens	K562	NA	1e5 cells	HRX332770
K562 ATF1 1e5 FLAG-CUT&RUN replicate 3	Homo sapiens	K562	NA	1e5 cells	HRX332771
K562 ATF1 5e3 FLAG-CUT&RUN replicate 1	Homo sapiens	K562	NA	5e3 cells	HRX332772
K562 ATF1 5e3 FLAG-CUT&RUN replicate 2	Homo sapiens	K562	NA	5e3 cells	HRX332773
K562 ATF1 5e3 FLAG-CUT&RUN replicate 3	Homo sapiens	K562	NA	5e3 cells	HRX332774
K562 ELF1 1e5 CUT&RUN replicate 1	Homo sapiens	K562	NA	1e5 cells	HRX332775
K562 ELF1 1e5 CUT&RUN replicate 2	Homo sapiens	K562	NA	1e5 cells	HRX332776
K562 ELF1 1e5 CUT&RUN replicate 3	Homo sapiens	K562	NA	1e5 cells	HRX332777
K562 ELF1 1e5 FLAG-CUT&RUN replicate 1	Homo sapiens	K562	NA	1e5 cells	HRX332778
K562 ELF1 1e5 FLAG-CUT&RUN replicate 2	Homo sapiens	K562	NA	1e5 cells	HRX332779
K562 ELF1 1e5 FLAG-CUT&RUN replicate 3	Homo sapiens	K562	NA	1e5 cells	HRX332780
K562 ELF1 5e3 FLAG-CUT&RUN replicate 1	Homo sapiens	K562	NA	5e3 cells	HRX332781
K562 ELF1 5e3 FLAG-CUT&RUN replicate 2	Homo sapiens	K562	NA	5e3 cells	HRX332782
K562 ELF1 5e3 FLAG-CUT&RUN replicate 3	Homo sapiens	K562	NA	5e3 cells	HRX332783
Nanog dome FitCUT&RUN replicate 1	Danio rerio	whole embryo	dome (4.3hpf)	50 embryos	CRX235507
Nanog dome FitCUT&RUN replicate 2	Danio rerio	whole embryo	dome (4.3hpf)	50 embryos	CRX235508
Nanog dome FitCUT&RUN replicate 3	Danio rerio	whole embryo	dome (4.3hpf)	50 embryos	CRX235509
Nanog dome FitCUT&RUN (20 embryos) replicate 1	Danio rerio	whole embryo	dome (4.3hpf)	20 embryos	CRX302604
Nanog dome FitCUT&RUN (20 embryos) replicate 2	Danio rerio	whole embryo	dome (4.3hpf)	20 embryos	CRX302605
Nanog dome FitCUT&RUN (20 embryos) replicate 3	Danio rerio	whole embryo	dome (4.3hpf)	20 embryos	CRX302606
Pou5f3 dome FitCUT&RUN replicate 1	Danio rerio	whole embryo	dome (4.3hpf)	50 embryos	CRX235510
Pou5f3 dome FitCUT&RUN replicate 2	Danio rerio	whole embryo	dome (4.3hpf)	50 embryos	CRX235511
Pou5f3 dome FitCUT&RUN replicate 3	Danio rerio	whole embryo	dome (4.3hpf)	50 embryos	CRX235512
Sox19b dome FitCUT&RUN replicate 1	Danio rerio	whole embryo	dome (4.3hpf)	50 embryos	CRX235513
Sox19b dome FitCUT&RUN replicate 2	Danio rerio	whole embryo	dome (4.3hpf)	50 embryos	CRX235514
Sox19b dome FitCUT&RUN replicate 3	Danio rerio	whole embryo	dome (4.3hpf)	50 embryos	CRX235515
Nanog 1k-cell FitCUT&RUN replicate 1	Danio rerio	whole embryo	1k-cell (3hpf)	100 embryos	CRX235516
Nanog 1k-cell FitCUT&RUN replicate 2	Danio rerio	whole embryo	1k-cell (3hpf)	100 embryos	CRX235517
Nanog 1k-cell FitCUT&RUN replicate 3	Danio rerio	whole embryo	1k-cell (3hpf)	100 embryos	CRX235518
Nanog 256-cell FitCUT&RUN replicate 1	Danio rerio	whole embryo	256-cell (2.5hpf)	200 embryos	CRX235519
Nanog 256-cell FitCUT&RUN replicate 2	Danio rerio	whole embryo	256-cell (2.5hpf)	200 embryos	CRX235520
Nanog 256-cell FitCUT&RUN replicate 3	Danio rerio	whole embryo	256-cell (2.5hpf)	200 embryos	CRX235521
rabit IgG type I 256-cell (pre-MBT) embryos replicate 1	Danio rerio	whole embryo	256-cell (2.5hpf)	200 embryos	CRX284796
rabit IgG type I 256-cell (pre-MBT) embryos replicate 2	Danio rerio	whole embryo	256-cell (2.5hpf)	200 embryos	CRX284797
rabit IgG type I 256-cell (pre-MBT) embryos replicate 3	Danio rerio	whole embryo	256-cell (2.5hpf)	200 embryos	CRX284798
rabit IgG type I 1k-cell (MBT) embryos replicate 1	Danio rerio	whole embryo	1k-cell (3hpf)	100 embryos	CRX284799
rabit IgG type I 1k-cell (MBT) embryos replicate 2	Danio rerio	whole embryo	1k-cell (3hpf)	100 embryos	CRX284800
rabit IgG type I 1k-cell (MBT) embryos replicate 3	Danio rerio	whole embryo	1k-cell (3hpf)	100 embryos	CRX284801
rabit IgG type I dome (post-MBT) embryos replicate 1	Danio rerio	whole embryo	dome (4.3hpf)	50 embryos	CRX284802
rabit IgG type I dome (post-MBT) embryos replicate 2	Danio rerio	whole embryo	dome (4.3hpf)	50 embryos	CRX284803
rabit IgG type I dome (post-MBT) embryos replicate 3	Danio rerio	whole embryo	dome (4.3hpf)	50 embryos	CRX284804
rabit IgG type I dome (post-MBT) embryos replicate 4	Danio rerio	whole embryo	dome (4.3hpf)	50 embryos	CRX284805
rabit IgG type II 256-cell (pre-MBT) embryos replicate 1	Danio rerio	whole embryo	256-cell (2.5hpf)	200 embryos	CRX284806
rabit IgG type II 256-cell (pre-MBT) embryos replicate 2	Danio rerio	whole embryo	256-cell (2.5hpf)	200 embryos	CRX284807
rabit IgG type II 1k-cell (MBT) embryos replicate 1	Danio rerio	whole embryo	1k-cell (3hpf)	100 embryos	CRX284808
rabit IgG type II 1k-cell (MBT) embryos replicate 2	Danio rerio	whole embryo	1k-cell (3hpf)	100 embryos	CRX284809
rabit IgG type II dome (post-MBT) embryos replicate 1	Danio rerio	whole embryo	dome (4.3hpf)	50 embryos	CRX284810
rabit IgG type II dome (post-MBT) embryos replicate 2	Danio rerio	whole embryo	dome (4.3hpf)	50 embryos	CRX284811

## Sheet: RNA-seq data
sample	organism	source	developmental stage	input material	accession number (GSA/GSA-Human)
WT 256-cell (pre-MBT) RNA-seq replicate 1	Danio rerio	whole embryo	256-cell (2.5hpf)	20 embryos	CRX299687
WT 256-cell (pre-MBT) RNA-seq replicate 2	Danio rerio	whole embryo	256-cell (2.5hpf)	20 embryos	CRX299688
WT 1k-cell (MBT) RNA-seq replicate 1	Danio rerio	whole embryo	1k-cell (3hpf)	20 embryos	CRX299689
WT 1k-cell (MBT) RNA-seq replicate 2	Danio rerio	whole embryo	1k-cell (3hpf)	20 embryos	CRX299690
WT dome (post-MBT) RNA-seq replicate 1	Danio rerio	whole embryo	dome (4.3hpf)	20 embryos	CRX299691
WT dome (post-MBT) RNA-seq replicate 2	Danio rerio	whole embryo	dome (4.3hpf)	20 embryos	CRX299692
nanog-rFc injection 256-cell (pre-MBT) RNA-seq replicate 1	Danio rerio	whole embryo	256-cell (2.5hpf)	20 embryos	CRX299693
nanog-rFc injection 256-cell (pre-MBT) RNA-seq replicate 2	Danio rerio	whole embryo	256-cell (2.5hpf)	20 embryos	CRX299694
nanog-rFc injection 1k-cell (MBT) RNA-seq replicate 1	Danio rerio	whole embryo	1k-cell (3hpf)	20 embryos	CRX299695
nanog-rFc injection 1k-cell (MBT) RNA-seq replicate 2	Danio rerio	whole embryo	1k-cell (3hpf)	20 embryos	CRX299696
nanog-rFc injection dome (post-MBT) RNA-seq replicate 1	Danio rerio	whole embryo	dome (4.3hpf)	20 embryos	CRX299697
nanog-rFc injection dome (post-MBT) RNA-seq replicate 2	Danio rerio	whole embryo	dome (4.3hpf)	20 embryos	CRX299698
H2O injection 256-cell (pre-MBT) RNA-seq replicate 1	Danio rerio	whole embryo	256-cell (2.5hpf)	20 embryos	CRX299699
H2O injection 256-cell (pre-MBT) RNA-seq replicate 2	Danio rerio	whole embryo	256-cell (2.5hpf)	20 embryos	CRX299700
H2O injection 1k-cell (MBT) RNA-seq replicate 1	Danio rerio	whole embryo	1k-cell (3hpf)	20 embryos	CRX299701
H2O injection 1k-cell (MBT) RNA-seq replicate 2	Danio rerio	whole embryo	1k-cell (3hpf)	20 embryos	CRX299702
H2O injection dome (post-MBT) RNA-seq replicate 1	Danio rerio	whole embryo	dome (4.3hpf)	20 embryos	CRX299703
H2O injection dome (post-MBT) RNA-seq replicate 2	Danio rerio	whole embryo	dome (4.3hpf)	20 embryos	CRX299704

## Sheet: ATAC-seq data
sample	organism	source	developmental stage	input material	accession number (GSA)
WT 256-cell ATAC-seq replicate 1	Danio rerio	whole embryo	256-cell (2.5hpf)	20 embryos	CRX235522
WT 256-cell ATAC-seq replicate 2	Danio rerio	whole embryo	256-cell (2.5hpf)	20 embryos	CRX235523
WT 1k-cell ATAC-seq replicate 1	Danio rerio	whole embryo	1k-cell (3hpf)	5 embryos	CRX235524
WT 1k-cell ATAC-seq replicate 2	Danio rerio	whole embryo	1k-cell (3hpf)	5 embryos	CRX235525
nanog-rFc 256-cell ATAC-seq replicate 1	Danio rerio	whole embryo	256-cell (2.5hpf)	20 embryos	CRX235526
nanog-rFc 256-cell ATAC-seq replicate 2	Danio rerio	whole embryo	256-cell (2.5hpf)	20 embryos	CRX235527
nanog-rFc 256-cell ATAC-seq replicate 3	Danio rerio	whole embryo	256-cell (2.5hpf)	20 embryos	CRX235528
nanog-rFc 1k-cell ATAC-seq replicate 1	Danio rerio	whole embryo	1k-cell (3hpf)	5 embryos	CRX235529
nanog-rFc 1k-cell ATAC-seq replicate 2	Danio rerio	whole embryo	1k-cell (3hpf)	5 embryos	CRX235530
nanog-rFc 1k-cell ATAC-seq replicate 3	Danio rerio	whole embryo	1k-cell (3hpf)	5 embryos	CRX235531
