# Supplementary material for: Antibody-free profiling of transcription factor occupancy during early embryogenesis by FitCUT&RUN
Source: HighWire-hosted journal article supplement (doi:10.1101/gr.275837.121), 2021-12-29
Supplement: Supplemental_Table_S3.xlsx [file Supplemental_Table_S3.xlsx]

## Sheet: ChIP-seq, CETCh-seq, CUT&RUN
Supplemental Table S3. Public high through-put sequencing data used in this study.
sample	organism	source	developmental stage	accession number (GEO)
ATF1_CETCh_rep1	Homo sapiens	K562	NA	GSM2527543
ATF1_CETCh_rep2	Homo sapiens	K562	NA	GSM2527544
ELF1_ChIP_rep1	Homo sapiens	K562	NA	GSM2828831
ELF1_ChIP_rep2	Homo sapiens	K562	NA	GSM2828832
Nanog_ChIP	Danio rerio	whole embryo	4.5hpf	GSM853235
Pou5f3_ChIP	Danio rerio	whole embryo	5hpf	GSM978985
Sox2_ChIP	Danio rerio	whole embryo	5hpf	GSM978984
IgG_CUT&RUN	Homo sapiens	K562	NA	GSM3391665

## Sheet: ATAC-seq
sample	organism	source	developmental stage	accession number (GEO)	accession number (GSA)
wt_oblong_atac_rep1	Danio rerio	whole embryo	oblong	GSM3756609
wt_oblong_atac_rep2	Danio rerio	whole embryo	oblong	GSM3756610
wt_oblong_atac_rep3	Danio rerio	whole embryo	oblong	GSM3756611
nanog-KO_oblong_atac_rep1	Danio rerio	whole embryo	oblong	GSM3756593
nanog-KO_oblong_atac_rep2	Danio rerio	whole embryo	oblong	GSM3756594
pou5f3-KO_oblong_atac_rep1	Danio rerio	whole embryo	oblong	GSM3756595
pou5f3-KO_oblong_atac_rep2	Danio rerio	whole embryo	oblong	GSM3756596
sox19b-KO_oblong_atac_rep1	Danio rerio	whole embryo	oblong	GSM3756597
sox19b-KO_oblong_atac_rep2	Danio rerio	whole embryo	oblong	GSM3756598
ATAC 256-cell rep1	Danio rerio	whole embryo	256-cell (2.5hpf)	GSM2715429	CRX233219
ATAC 256-cell rep2	Danio rerio	whole embryo	256-cell (2.5hpf)	GSM2715430	CRX233220
ATAC 256-cell rep3	Danio rerio	whole embryo	256-cell (2.5hpf)	GSM2715431	CRX233221
ATAC 1k-cell rep1	Danio rerio	whole embryo	1k-cell (3hpf)	GSM2715432	CRX233222
ATAC 1k-cell rep2	Danio rerio	whole embryo	1k-cell (3hpf)	GSM2715433	CRX233223
ATAC 1k-cell rep3	Danio rerio	whole embryo	1k-cell (3hpf)	GSM2715434	CRX233224
ATAC oblong rep1	Danio rerio	whole embryo	oblong (3.7hpf)	GSM2715435	CRX233225
ATAC oblong rep2	Danio rerio	whole embryo	oblong (3.7hpf)	GSM2715436	CRX233226
ATAC oblong rep3	Danio rerio	whole embryo	oblong (3.7hpf)	GSM2715437	CRX233227

## Sheet: RNA-seq
sample	organism	source	developmental stage	accession number (ENA)
1cell_rep1	Danio rerio	whole embryo	1cell (0.0hpf)	SAMEA3892105
1cell_rep2	Danio rerio	whole embryo	1cell (0.0hpf)	SAMEA3892106
1cell_rep3	Danio rerio	whole embryo	1cell (0.0hpf)	SAMEA3892107
1cell_rep4	Danio rerio	whole embryo	1cell (0.0hpf)	SAMEA3892109
1cell_rep5	Danio rerio	whole embryo	1cell (0.0hpf)	SAMEA3892110
2cell_rep1	Danio rerio	whole embryo	2cell (0.75hpf)	SAMEA3892081
2cell_rep2	Danio rerio	whole embryo	2cell (0.75hpf)	SAMEA3892082
2cell_rep3	Danio rerio	whole embryo	2cell (0.75hpf)	SAMEA3892083
2cell_rep4	Danio rerio	whole embryo	2cell (0.75hpf)	SAMEA3892084
2cell_rep5	Danio rerio	whole embryo	2cell (0.75hpf)	SAMEA3892085
128cell_rep1	Danio rerio	whole embryo	128cell (2.25hpf)	SAMEA3892087
128cell_rep2	Danio rerio	whole embryo	128cell (2.25hpf)	SAMEA3892088
128cell_rep3	Danio rerio	whole embryo	128cell (2.25hpf)	SAMEA3892089
128cell_rep4	Danio rerio	whole embryo	128cell (2.25hpf)	SAMEA3892090
128cell_rep5	Danio rerio	whole embryo	128cell (2.25hpf)	SAMEA3892091
1k-cell_rep1	Danio rerio	whole embryo	1k-cell (3hpf)	SAMEA3892099
1k-cell_rep2	Danio rerio	whole embryo	1k-cell (3hpf)	SAMEA3892100
1k-cell_rep3	Danio rerio	whole embryo	1k-cell (3hpf)	SAMEA3892101
1k-cell_rep4	Danio rerio	whole embryo	1k-cell (3hpf)	SAMEA3892102
1k-cell_rep5	Danio rerio	whole embryo	1k-cell (3hpf)	SAMEA3892104
dome_rep1	Danio rerio	whole embryo	dome (4.3hpf)	SAMEA3892075
dome_rep2	Danio rerio	whole embryo	dome (4.3hpf)	SAMEA3892076
dome_rep3	Danio rerio	whole embryo	dome (4.3hpf)	SAMEA3892077
dome_rep4	Danio rerio	whole embryo	dome (4.3hpf)	SAMEA3892078
dome_rep5	Danio rerio	whole embryo	dome (4.3hpf)	SAMEA3892079
50epi_rep1	Danio rerio	whole embryo	50%-epiboly (5.25hpf)	SAMEA3892004
50epi_rep2	Danio rerio	whole embryo	50%-epiboly (5.25hpf)	SAMEA3892005
50epi_rep3	Danio rerio	whole embryo	50%-epiboly (5.25hpf)	SAMEA3892006
50epi_rep4	Danio rerio	whole embryo	50%-epiboly (5.25hpf)	SAMEA3892007
50epi_rep5	Danio rerio	whole embryo	50%-epiboly (5.25hpf)	SAMEA3892008
6hpf_rep1	Danio rerio	whole embryo	shield (6hpf)	SAMEA3892050
6hpf_rep2	Danio rerio	whole embryo	shield (6hpf)	SAMEA3892051
6hpf_rep3	Danio rerio	whole embryo	shield (6hpf)	SAMEA3892052
6hpf_rep4	Danio rerio	whole embryo	shield (6hpf)	SAMEA3892054
6hpf_rep5	Danio rerio	whole embryo	shield (6hpf)	SAMEA3892055
8hpf_rep1	Danio rerio	whole embryo	75%-epiboly (8hpf)	SAMEA3892056
8hpf_rep2	Danio rerio	whole embryo	75%-epiboly (8hpf)	SAMEA3892057
8hpf_rep3	Danio rerio	whole embryo	75%-epiboly (8hpf)	SAMEA3892058
8hpf_rep4	Danio rerio	whole embryo	75%-epiboly (8hpf)	SAMEA3892060
8hpf_rep5	Danio rerio	whole embryo	75%-epiboly (8hpf)	SAMEA3892061
10.33hpf_rep1	Danio rerio	whole embryo	1-4 somites (10.33hpf)	SAMEA3892093
10.33hpf_rep2	Danio rerio	whole embryo	1-4 somites (10.33hpf)	SAMEA3892094
10.33hpf_rep3	Danio rerio	whole embryo	1-4 somites (10.33hpf)	SAMEA3892095
10.33hpf_rep4	Danio rerio	whole embryo	1-4 somites (10.33hpf)	SAMEA3892096
10.33hpf_rep5	Danio rerio	whole embryo	1-4 somites (10.33hpf)	SAMEA3892097
16hpf_somites_rep1	Danio rerio	whole embryo	14-19 somites (16hpf)	SAMEA3892063
16hpf_somites_rep2	Danio rerio	whole embryo	14-19 somites (16hpf)	SAMEA3892064
16hpf_somites_rep3	Danio rerio	whole embryo	14-19 somites (16hpf)	SAMEA3892065
16hpf_somites_rep4	Danio rerio	whole embryo	14-19 somites (16hpf)	SAMEA3892066
16hpf_somites_rep5	Danio rerio	whole embryo	14-19 somites (16hpf)	SAMEA3892067
19hpf_somites_rep1	Danio rerio	whole embryo	20-25 somites (19hpf)	SAMEA3892069
19hpf_somites_rep2	Danio rerio	whole embryo	20-25 somites (19hpf)	SAMEA3892070
19hpf_somites_rep3	Danio rerio	whole embryo	20-25 somites (19hpf)	SAMEA3892071
19hpf_somites_rep4	Danio rerio	whole embryo	20-25 somites (19hpf)	SAMEA3892072
19hpf_somites_rep5	Danio rerio	whole embryo	20-25 somites (19hpf)	SAMEA3892073
24hpf_rep1	Danio rerio	whole embryo	prime-5 (24hpf)	SAMEA3892009
24hpf_rep2	Danio rerio	whole embryo	prime-5 (24hpf)	SAMEA3892010
24hpf_rep3	Danio rerio	whole embryo	prime-5 (24hpf)	SAMEA3892011
24hpf_rep4	Danio rerio	whole embryo	prime-5 (24hpf)	SAMEA3892012
24hpf_rep5	Danio rerio	whole embryo	prime-5 (24hpf)	SAMEA3892013
30hpf_rep1	Danio rerio	whole embryo	prime-15 (30hpf)	SAMEA3892014
30hpf_rep2	Danio rerio	whole embryo	prime-15 (30hpf)	SAMEA3892015
30hpf_rep3	Danio rerio	whole embryo	prime-15 (30hpf)	SAMEA3892016
30hpf_rep4	Danio rerio	whole embryo	prime-15 (30hpf)	SAMEA3892017
30hpf_rep5	Danio rerio	whole embryo	prime-15 (30hpf)	SAMEA3892018
36hpf_rep1	Danio rerio	whole embryo	prime-25 (36hpf)	SAMEA3892019
36hpf_rep2	Danio rerio	whole embryo	prime-25 (36hpf)	SAMEA3892020
36hpf_rep3	Danio rerio	whole embryo	prime-25 (36hpf)	SAMEA3892021
36hpf_rep4	Danio rerio	whole embryo	prime-25 (36hpf)	SAMEA3892023
36hpf_rep5	Danio rerio	whole embryo	prime-25 (36hpf)	SAMEA3892024
2dpf_rep1	Danio rerio	whole embryo	long-pec (2dpf)	SAMEA3892025
2dpf_rep2	Danio rerio	whole embryo	long-pec (2dpf)	SAMEA3892026
2dpf_rep3	Danio rerio	whole embryo	long-pec (2dpf)	SAMEA3892028
2dpf_rep4	Danio rerio	whole embryo	long-pec (2dpf)	SAMEA3892029
2dpf_rep5	Danio rerio	whole embryo	long-pec (2dpf)	SAMEA3892030
3dpf_rep1	Danio rerio	whole embryo	protruding-mouth (3dpf)	SAMEA3892031
3dpf_rep2	Danio rerio	whole embryo	protruding-mouth (3dpf)	SAMEA3892032
3dpf_rep3	Danio rerio	whole embryo	protruding-mouth (3dpf)	SAMEA3892034
3dpf_rep4	Danio rerio	whole embryo	protruding-mouth (3dpf)	SAMEA3892035
3dpf_rep5	Danio rerio	whole embryo	protruding-mouth (3dpf)	SAMEA3892036
4dpf_rep1	Danio rerio	whole embryo	4dpf	SAMEA3892037
4dpf_rep2	Danio rerio	whole embryo	4dpf	SAMEA3892038
4dpf_rep3	Danio rerio	whole embryo	4dpf	SAMEA3892040
4dpf_rep4	Danio rerio	whole embryo	4dpf	SAMEA3892041
4dpf_rep5	Danio rerio	whole embryo	4dpf	SAMEA3892042
5dpf_rep1	Danio rerio	whole embryo	5dpf	SAMEA3892044
5dpf_rep2	Danio rerio	whole embryo	5dpf	SAMEA3892045
5dpf_rep3	Danio rerio	whole embryo	5dpf	SAMEA3892046
5dpf_rep4	Danio rerio	whole embryo	5dpf	SAMEA3892047
5dpf_rep5	Danio rerio	whole embryo	5dpf	SAMEA3892049
