# Supplementary material for: Antibody-free profiling of transcription factor occupancy during early embryogenesis by FitCUT&RUN
Source: HighWire-hosted journal article supplement (doi:10.1101/gr.275837.121), 2021-12-29
Supplement: Supplemental_Table_S4.xlsx [file Supplemental_Table_S4.xlsx]

## Sheet: Nanog 256 FitCUT&RUN
Supplemental Table S4. Nanog, Pou5f3, and Sox19b binding sites.
chrom	start	end	name	score	strand	signalValue	pValue	qValue	peak	contain nanog motif
chr1	179386	179551	Nanog_256_peak_2	144	.	10.7386	18.309	14.4604	60	FALSE
chr1	1029004	1029315	Nanog_256_peak_12	222	.	14.1441	26.514	22.2911	259	FALSE
chr1	1133924	1134067	Nanog_256_peak_14	224	.	13.7576	26.6654	22.4369	44	FALSE
chr1	1402643	1402781	Nanog_256_peak_20	311	.	17.679	35.7636	31.1875	72	FALSE
chr1	2260182	2260365	Nanog_256_peak_29	156	.	11.1936	19.6097	15.6967	81	FALSE
chr1	3516395	3516526	Nanog_256_peak_38	197	.	12.7231	23.8991	19.7834	64	TRUE
chr1	4210535	4210703	Nanog_256_peak_44	255	.	15.289	29.8937	25.5349	122	FALSE
chr1	4724837	4725091	Nanog_256_peak_47	185	.	10.0606	22.6319	18.5725	164	FALSE
chr1	5013915	5014033	Nanog_256_peak_53	207	.	13.3058	24.9434	20.7869	51	FALSE
chr1	5111626	5111843	Nanog_256_peak_54	451	.	16.9927	50.1112	45.1023	119	FALSE
chr1	5966024	5966175	Nanog_256_peak_65	178	.	11.813	21.8572	17.8342	86	TRUE
chr1	7064960	7065459	Nanog_256_peak_77	290	.	12.0028	33.5319	29.0371	455	TRUE
chr1	7916826	7916978	Nanog_256_peak_92	201	.	12.9568	24.3139	20.1824	102	FALSE
chr1	10107499	10107778	Nanog_256_peak_123	384	.	16.1619	43.2672	38.4397	150	TRUE
chr1	10598838	10599397	Nanog_256_peak_131	437	.	11.471	48.7694	43.7967	407	TRUE
chr1	11495601	11495757	Nanog_256_peak_142	181	.	12.2364	22.205	18.1658	66	FALSE
chr1	11878269	11878504	Nanog_256_peak_147	172	.	10.843	21.2051	17.2143	89	FALSE
chr1	12046360	12046480	Nanog_256_peak_148	132	.	10.1029	17.0314	13.2503	68	FALSE
chr1	12277500	12277723	Nanog_256_peak_152	212	.	13.0601	25.4561	21.2761	120	FALSE
chr1	13597725	13597979	Nanog_256_peak_163	547	.	25.045	60.0699	54.8	59	FALSE
chr1	13603004	13603149	Nanog_256_peak_164	275	.	15.595	32.0121	27.5723	81	TRUE
chr1	14509841	14510118	Nanog_256_peak_176	243	.	11.4272	28.627	24.3187	114	FALSE
chr1	15330741	15330918	Nanog_256_peak_178	169	.	10.9953	20.9463	16.9685	48	FALSE
chr1	15518043	15518204	Nanog_256_peak_179	445	.	19.788	49.5159	44.5237	102	TRUE
chr1	15927146	15927405	Nanog_256_peak_185	210	.	11.9155	25.2113	21.0413	165	FALSE
chr1	17209601	17209716	Nanog_256_peak_193	141	.	10.5881	17.9889	14.1582	37	FALSE
chr1	17264545	17264678	Nanog_256_peak_194	142	.	10.652	18.1198	14.2827	79	FALSE
chr1	17857291	17857503	Nanog_256_peak_199	316	.	16.2483	36.2597	31.6669	75	TRUE
chr1	18710701	18711013	Nanog_256_peak_211	201	.	12.3448	24.2417	20.1128	102	FALSE
chr1	19649928	19650356	Nanog_256_peak_222	806	.	21.2352	86.4636	80.6821	68	FALSE
chr1	21209750	21209870	Nanog_256_peak_233	159	.	10.9474	19.9224	15.9933	70	FALSE
chr1	21291770	21291999	Nanog_256_peak_234	288	.	14.5238	33.3549	28.8668	84	FALSE
chr1	21296998	21297311	Nanog_256_peak_235	184	.	10.6288	22.4795	18.4266	71	TRUE
chr1	23352940	23353086	Nanog_256_peak_249	165	.	11.7525	20.5403	16.5816	79	FALSE
chr1	23489833	23489976	Nanog_256_peak_252	172	.	11.6921	21.2207	17.2287	79	TRUE
chr1	24233353	24233491	Nanog_256_peak_261	171	.	11.852	21.1507	17.1623	69	TRUE
chr1	24614710	24614897	Nanog_256_peak_262	146	.	10.7457	18.4918	14.6341	63	FALSE
chr1	24873273	24873705	Nanog_256_peak_266	763	.	20.0334	82.046	76.3418	207	TRUE
chr1	24938677	24939047	Nanog_256_peak_270	232	.	11.1631	27.5321	23.2686	143	TRUE
chr1	25494060	25494181	Nanog_256_peak_276	160	.	10.7102	19.9803	16.0484	69	FALSE
chr1	25565949	25566048	Nanog_256_peak_277	322	.	18.4635	36.8941	32.2758	52	FALSE
chr1	25687568	25687773	Nanog_256_peak_280	158	.	10.8675	19.7858	15.8641	121	FALSE
chr1	25801445	25801627	Nanog_256_peak_281	479	.	21.8447	53.0072	47.9166	61	FALSE
chr1	26071550	26071783	Nanog_256_peak_283	206	.	12.6627	24.7787	20.6294	55	FALSE
chr1	26394330	26394622	Nanog_256_peak_288	220	.	11.8188	26.2375	22.0252	48	FALSE
chr1	26617386	26617790	Nanog_256_peak_290	250	.	11.486	29.3588	25.0193	147	TRUE
chr1	26642727	26642968	Nanog_256_peak_291	225	.	13.828	26.7892	22.5549	132	TRUE
chr1	26673379	26673837	Nanog_256_peak_293	305	.	13.5717	35.0953	30.5428	239	FALSE
chr1	26851277	26851449	Nanog_256_peak_297	153	.	10.5593	19.2625	15.3663	43	FALSE
chr1	26915065	26915305	Nanog_256_peak_301	299	.	12.1358	34.4448	29.916	198	TRUE
chr1	27135948	27136229	Nanog_256_peak_304	216	.	10.902	25.8549	21.6575	162	TRUE
chr1	27541952	27542051	Nanog_256_peak_305	193	.	13.0155	23.416	19.3236	51	FALSE
chr1	27561250	27561512	Nanog_256_peak_306	269	.	15.5521	31.3782	26.9617	86	FALSE
chr1	29226861	29226981	Nanog_256_peak_317	197	.	12.7231	23.8991	19.7834	49	FALSE
chr1	29463066	29463377	Nanog_256_peak_318	247	.	13.5169	29.0937	24.7649	195	TRUE
chr1	29855194	29855529	Nanog_256_peak_322	523	.	17.5886	57.5914	52.3768	98	FALSE
chr1	29893980	29894230	Nanog_256_peak_324	327	.	16.5418	37.4306	32.7934	93	FALSE
chr1	30075199	30075348	Nanog_256_peak_327	417	.	19.8963	46.6616	41.7398	52	TRUE
chr1	30188011	30188167	Nanog_256_peak_329	189	.	12.6521	22.9832	18.9088	70	FALSE
chr1	31421398	31421623	Nanog_256_peak_336	265	.	14.2334	30.9187	26.5184	134	FALSE
chr1	31534010	31534168	Nanog_256_peak_338	198	.	10.8144	23.9348	19.8171	67	TRUE
chr1	31544623	31544828	Nanog_256_peak_339	290	.	15.0269	33.5398	29.0446	101	TRUE
chr1	31725001	31725133	Nanog_256_peak_340	167	.	11.5924	20.6681	16.7033	75	TRUE
chr1	31762621	31762805	Nanog_256_peak_341	163	.	11.6434	20.3044	16.3564	91	FALSE
chr1	32425102	32425207	Nanog_256_peak_344	134	.	10.22	17.2571	13.4643	34	FALSE
chr1	33047821	33047993	Nanog_256_peak_347	198	.	12.756	23.9572	19.839	113	FALSE
chr1	33647507	33647664	Nanog_256_peak_352	179	.	11.2927	21.9528	17.9256	100	FALSE
chr1	34138065	34138256	Nanog_256_peak_356	244	.	14.894	28.7157	24.4034	99	TRUE
chr1	34350740	34350935	Nanog_256_peak_357	193	.	11.515	23.4014	19.3093	61	FALSE
chr1	34355783	34356205	Nanog_256_peak_358	194	.	10.5626	23.5023	19.406	240	TRUE
chr1	36443111	36443341	Nanog_256_peak_376	483	.	16.6847	53.44	48.3363	93	FALSE
chr1	38173699	38173894	Nanog_256_peak_393	267	.	11.1272	31.1883	26.7794	122	TRUE
chr1	38708515	38709063	Nanog_256_peak_403	283	.	13.4577	32.8688	28.3981	323	TRUE
chr1	39872703	39873139	Nanog_256_peak_423	380	.	16.7636	42.8267	38.0118	159	TRUE
chr1	40120554	40120805	Nanog_256_peak_429	224	.	13.1189	26.6446	22.4171	65	FALSE
chr1	40131683	40131846	Nanog_256_peak_430	370	.	16.6411	41.8758	37.0896	75	TRUE
chr1	40481406	40481613	Nanog_256_peak_433	258	.	14.9076	30.2545	25.8798	181	FALSE
chr1	40518119	40518304	Nanog_256_peak_434	209	.	12.8431	25.0852	20.9215	60	TRUE
chr1	40647210	40647503	Nanog_256_peak_435	340	.	15.674	38.7657	34.08	254	FALSE
chr1	40912786	40913175	Nanog_256_peak_438	358	.	12.2055	40.5842	35.8411	195	TRUE
chr1	40966821	40966973	Nanog_256_peak_441	136	.	10.0159	17.4986	13.6926	105	FALSE
chr1	43835951	43836070	Nanog_256_peak_469	155	.	10.9055	19.4349	15.5308	78	TRUE
chr1	44012888	44013170	Nanog_256_peak_473	367	.	16.4619	41.568	36.7919	168	TRUE
chr1	45003116	45003353	Nanog_256_peak_486	211	.	11.2726	25.3064	21.1327	139	FALSE
chr1	46115029	46115352	Nanog_256_peak_498	353	.	12.9381	40.0831	35.3569	169	TRUE
chr1	46832653	46832917	Nanog_256_peak_509	335	.	13.3995	38.2226	33.5566	151	FALSE
chr1	47122822	47122981	Nanog_256_peak_514	169	.	11.5411	20.9535	16.9752	77	TRUE
chr1	47177157	47177407	Nanog_256_peak_516	252	.	10.9505	29.5992	25.2504	117	TRUE
chr1	47824603	47824790	Nanog_256_peak_523	248	.	13.9505	29.2114	24.8783	130	TRUE
chr1	48898602	48898809	Nanog_256_peak_533	177	.	11.4543	21.7159	17.7	53	FALSE
chr1	48939882	48940136	Nanog_256_peak_534	198	.	12.4622	23.9237	19.8065	202	FALSE
chr1	49289037	49289439	Nanog_256_peak_537	189	.	11.6283	23.042	18.9657	155	TRUE
chr1	49352600	49352919	Nanog_256_peak_539	189	.	11.2623	22.9807	18.9064	255	FALSE
chr1	49591626	49591876	Nanog_256_peak_541	264	.	14.9348	30.8771	26.4778	132	TRUE
chr1	50542959	50543086	Nanog_256_peak_548	168	.	11.6884	20.8454	16.8722	66	TRUE
chr1	50922385	50922678	Nanog_256_peak_554	545	.	11.8405	59.8378	54.5723	136	FALSE
chr1	50923658	50923927	Nanog_256_peak_555	890	.	16.1356	94.9922	89.0605	159	FALSE
chr1	51128964	51129086	Nanog_256_peak_557	167	.	11.7876	20.7569	16.7877	52	TRUE
chr1	51463433	51463580	Nanog_256_peak_563	188	.	12.1893	22.9681	18.8943	90	FALSE
chr1	51734562	51734659	Nanog_256_peak_567	140	.	10.4184	17.8762	14.0513	43	FALSE
chr1	51829166	51829416	Nanog_256_peak_569	224	.	13.4654	26.6771	22.448	104	TRUE
chr1	52002518	52002625	Nanog_256_peak_572	142	.	10.62	18.054	14.2197	63	TRUE
chr1	52792691	52792983	Nanog_256_peak_577	534	.	20.8897	58.7066	53.4661	89	FALSE
chr1	52932109	52932491	Nanog_256_peak_581	201	.	12.0561	24.3029	20.1716	253	FALSE
chr1	53466377	53466642	Nanog_256_peak_584	170	.	11.0198	20.9872	17.007	74	FALSE
chr1	54332851	54333261	Nanog_256_peak_595	191	.	11.4218	23.2463	19.1618	214	TRUE
chr1	54765301	54765526	Nanog_256_peak_604	295	.	14.9567	34.0849	29.5697	54	FALSE
chr1	54972264	54972466	Nanog_256_peak_605	211	.	13.2947	25.3684	21.1918	49	FALSE
chr1	55108841	55108968	Nanog_256_peak_609	154	.	10.8775	19.3857	15.4837	67	TRUE
chr1	58671983	58672211	Nanog_256_peak_628	221	.	12.6032	26.3603	22.1423	98	FALSE
chr1	58839170	58839350	Nanog_256_peak_629	141	.	10.5881	17.9889	14.1582	121	FALSE
chr10	74454	74592	Nanog_256_peak_636	144	.	10.2457	18.2954	14.4485	47	FALSE
chr10	1961658	1961909	Nanog_256_peak_660	552	.	21.9606	60.5653	55.2858	144	TRUE
chr10	2427704	2428024	Nanog_256_peak_665	225	.	13.4976	26.7321	22.5007	116	FALSE
chr10	4144483	4144633	Nanog_256_peak_678	230	.	14.5611	27.3337	23.0787	70	TRUE
chr10	6010337	6010640	Nanog_256_peak_688	193	.	12.1691	23.4247	19.332	164	FALSE
chr10	8624703	8624844	Nanog_256_peak_711	359	.	16.7931	40.6737	35.9287	79	TRUE
chr10	9398814	9399208	Nanog_256_peak_722	304	.	12.7538	34.9568	30.4096	167	FALSE
chr10	10015720	10015922	Nanog_256_peak_733	165	.	11.011	20.4858	16.5291	33	TRUE
chr10	10047142	10047347	Nanog_256_peak_734	155	.	10.9337	19.4844	15.5773	86	FALSE
chr10	12516962	12517108	Nanog_256_peak_752	258	.	13.0617	30.2211	25.8476	67	FALSE
chr10	14208969	14209116	Nanog_256_peak_766	194	.	12.9454	23.5484	19.4496	54	FALSE
chr10	14566533	14566714	Nanog_256_peak_771	142	.	10.5057	18.0384	14.2052	53	TRUE
chr10	14928928	14929252	Nanog_256_peak_774	235	.	12.4192	27.8668	23.5903	251	TRUE
chr10	15074773	15075113	Nanog_256_peak_778	259	.	13.4859	30.2988	25.9224	145	TRUE
chr10	15184717	15184963	Nanog_256_peak_779	282	.	16.2982	32.712	28.2477	146	FALSE
chr10	15854959	15855153	Nanog_256_peak_788	199	.	12.5529	24.079	19.9558	103	FALSE
chr10	16232355	16232662	Nanog_256_peak_792	219	.	12.8046	26.1173	21.9104	57	FALSE
chr10	16713356	16713612	Nanog_256_peak_796	317	.	14.6691	36.3308	31.7347	135	FALSE
chr10	16800701	16800857	Nanog_256_peak_803	655	.	18.146	71.0424	65.5463	83	FALSE
chr10	17451466	17451639	Nanog_256_peak_813	186	.	11.7544	22.7252	18.6617	49	FALSE
chr10	17505874	17506103	Nanog_256_peak_814	245	.	13.0364	28.909	24.5877	73	TRUE
chr10	17843759	17843906	Nanog_256_peak_820	373	.	19.6406	42.1221	37.3287	67	TRUE
chr10	19219689	19219918	Nanog_256_peak_837	139	.	10.1946	17.8084	13.9873	162	FALSE
chr10	19905582	19906067	Nanog_256_peak_841	474	.	18.7779	52.5367	47.462	148	FALSE
chr10	20292760	20293151	Nanog_256_peak_847	154	.	10.8775	19.3857	15.4837	196	FALSE
chr10	20972336	20972503	Nanog_256_peak_857	283	.	15.7096	32.7969	28.3288	78	TRUE
chr10	22081284	22081784	Nanog_256_peak_873	322	.	12.0443	36.9048	32.286	149	FALSE
chr10	22155812	22155965	Nanog_256_peak_874	251	.	14.4496	29.4685	25.1244	30	TRUE
chr10	22871499	22871770	Nanog_256_peak_880	255	.	11.1232	29.9304	25.5702	205	FALSE
chr10	23417011	23417243	Nanog_256_peak_887	160	.	11.5011	20.0025	16.0696	88	TRUE
chr10	23638371	23638629	Nanog_256_peak_889	184	.	11.8957	22.4644	18.4126	67	FALSE
chr10	23665175	23665424	Nanog_256_peak_891	215	.	13.2197	25.7302	21.5382	159	FALSE
chr10	24055332	24055495	Nanog_256_peak_894	186	.	12.5105	22.7151	18.652	69	FALSE
chr10	24133026	24133173	Nanog_256_peak_899	149	.	10.9014	18.7921	14.9186	88	TRUE
chr10	24148117	24148343	Nanog_256_peak_900	146	.	10.3459	18.4661	14.609	79	TRUE
chr10	24825357	24825629	Nanog_256_peak_907	183	.	11.5446	22.3735	18.3261	45	FALSE
chr10	24886043	24886149	Nanog_256_peak_909	176	.	12.2499	21.6711	17.6569	48	FALSE
chr10	25212992	25213128	Nanog_256_peak_912	167	.	11.394	20.6951	16.7293	74	TRUE
chr10	25223240	25223408	Nanog_256_peak_913	196	.	11.7061	23.7195	19.6122	48	FALSE
chr10	25532400	25532509	Nanog_256_peak_916	155	.	11.2266	19.437	15.5325	44	TRUE
chr10	26852664	26852779	Nanog_256_peak_930	247	.	15.3772	29.0352	24.7091	70	FALSE
chr10	26934850	26935082	Nanog_256_peak_932	352	.	15.5152	39.929	35.2073	152	TRUE
chr10	26972641	26972869	Nanog_256_peak_933	198	.	12.4622	23.9237	19.8065	164	FALSE
chr10	27222211	27222533	Nanog_256_peak_935	302	.	15.3534	34.7527	30.2134	170	FALSE
chr10	28152633	28152832	Nanog_256_peak_948	178	.	11.2436	21.871	17.8476	55	FALSE
chr10	28177251	28177359	Nanog_256_peak_951	158	.	10.5896	19.7788	15.8579	61	TRUE
chr10	28380986	28381190	Nanog_256_peak_954	174	.	11.0044	21.4732	17.4689	120	TRUE
chr10	28388688	28388884	Nanog_256_peak_955	180	.	11.3671	22.0769	18.0439	140	FALSE
chr10	28740544	28740739	Nanog_256_peak_964	153	.	10.7943	19.2401	15.3446	70	FALSE
chr10	28860372	28860567	Nanog_256_peak_965	151	.	10.8887	19.0454	15.1593	77	TRUE
chr10	29242815	29242939	Nanog_256_peak_968	183	.	12.481	22.3671	18.3202	55	FALSE
chr10	29770026	29770211	Nanog_256_peak_971	186	.	12.0407	22.7126	18.6498	30	FALSE
chr10	29917967	29918743	Nanog_256_peak_977	613	.	16.2638	66.7404	61.3309	232	FALSE
chr10	29929568	29929986	Nanog_256_peak_978	183	.	10.2739	22.4381	18.3879	203	FALSE
chr10	29932127	29932272	Nanog_256_peak_979	282	.	13.3677	32.7123	28.2479	69	FALSE
chr10	32206543	32206652	Nanog_256_peak_996	172	.	11.8853	21.2133	17.2219	54	FALSE
chr10	32494251	32494362	Nanog_256_peak_998	311	.	17.679	35.7636	31.1875	40	TRUE
chr10	32762639	32762890	Nanog_256_peak_1001	148	.	10.4998	18.7299	14.8595	190	TRUE
chr10	33342335	33342526	Nanog_256_peak_1005	210	.	12.6223	25.2502	21.078	57	TRUE
chr10	33521027	33521247	Nanog_256_peak_1007	152	.	11.0942	19.1714	15.279	55	FALSE
chr10	33527621	33527767	Nanog_256_peak_1008	152	.	11.0616	19.1066	15.2176	24	FALSE
chr10	33622161	33622319	Nanog_256_peak_1009	174	.	12.0203	21.4691	17.465	62	FALSE
chr10	33888456	33888622	Nanog_256_peak_1014	149	.	10.0468	18.8767	14.9992	108	FALSE
chr10	34703921	34704255	Nanog_256_peak_1019	279	.	14.3751	32.4437	27.9881	269	TRUE
chr10	35152462	35152783	Nanog_256_peak_1021	359	.	14.7171	40.6748	35.9295	128	FALSE
chr10	35257332	35257638	Nanog_256_peak_1023	203	.	12.8013	24.5068	20.3681	203	TRUE
chr10	35554027	35554198	Nanog_256_peak_1027	150	.	10.605	18.9113	15.0322	84	FALSE
chr10	35743807	35744072	Nanog_256_peak_1029	159	.	10.3501	19.8741	15.9479	61	FALSE
chr10	36026377	36026594	Nanog_256_peak_1033	391	.	17.8733	43.9775	39.1271	94	FALSE
chr10	36234592	36234886	Nanog_256_peak_1034	426	.	18.631	47.5466	42.6049	151	FALSE
chr10	38472618	38472757	Nanog_256_peak_1050	221	.	13.8647	26.3882	22.1695	52	FALSE
chr10	39212756	39212907	Nanog_256_peak_1056	408	.	20.6209	45.7887	40.8902	104	FALSE
chr10	40160392	40160675	Nanog_256_peak_1064	150	.	10.0683	18.9123	15.0329	151	TRUE
chr10	40607960	40608179	Nanog_256_peak_1068	278	.	14.3186	32.3486	27.8965	51	TRUE
chr10	40768428	40768728	Nanog_256_peak_1071	173	.	11.4954	21.3093	17.3129	137	TRUE
chr10	40774355	40774649	Nanog_256_peak_1072	244	.	14.019	28.7366	24.4235	188	TRUE
chr10	40923086	40923526	Nanog_256_peak_1074	260	.	12.4142	30.3888	26.0084	391	TRUE
chr10	41758729	41759133	Nanog_256_peak_1081	273	.	14.3645	31.7762	27.3456	326	FALSE
chr10	41766472	41766703	Nanog_256_peak_1083	142	.	10.099	18.0467	14.2127	167	TRUE
chr10	41986171	41986326	Nanog_256_peak_1085	138	.	10.0917	17.6296	13.8174	86	FALSE
chr10	42113484	42113921	Nanog_256_peak_1089	153	.	10.2437	19.2031	15.3091	368	TRUE
chr10	42254034	42254387	Nanog_256_peak_1095	166	.	11.0628	20.5733	16.6122	199	FALSE
chr10	42296054	42296233	Nanog_256_peak_1097	247	.	12.3744	29.0427	24.7163	41	FALSE
chr10	42348252	42348455	Nanog_256_peak_1098	255	.	15.289	29.8937	25.5349	53	TRUE
chr10	44301198	44301362	Nanog_256_peak_1119	155	.	11.1312	19.4931	15.5855	84	FALSE
chr10	45009392	45009653	Nanog_256_peak_1130	248	.	12.1156	29.2254	24.891	87	TRUE
chr11	393901	394078	Nanog_256_peak_1142	146	.	10.7457	18.4918	14.6341	50	FALSE
chr11	884225	884506	Nanog_256_peak_1145	213	.	13.0917	25.5102	21.3277	60	FALSE
chr11	1435352	1435437	Nanog_256_peak_1153	133	.	10.0297	17.1683	13.3795	23	FALSE
chr11	2735193	2735436	Nanog_256_peak_1167	165	.	11.5292	20.5523	16.5923	117	FALSE
chr11	2752858	2752986	Nanog_256_peak_1168	146	.	10.572	18.4736	14.6164	43	FALSE
chr11	3176578	3176732	Nanog_256_peak_1178	207	.	13.0598	24.956	20.799	50	FALSE
chr11	5817819	5817914	Nanog_256_peak_1208	196	.	12.8804	23.7641	19.6543	67	FALSE
chr11	6010031	6010151	Nanog_256_peak_1211	305	.	16.3633	35.1486	30.5945	59	FALSE
chr11	6452788	6453015	Nanog_256_peak_1214	252	.	12.3542	29.6429	25.2923	83	TRUE
chr11	6701221	6701326	Nanog_256_peak_1218	159	.	10.9474	19.9224	15.9933	63	FALSE
chr11	7147443	7147715	Nanog_256_peak_1220	194	.	11.6337	23.599	19.4974	214	FALSE
chr11	7588306	7588733	Nanog_256_peak_1226	165	.	10.7092	20.4698	16.514	230	FALSE
chr11	8604899	8605007	Nanog_256_peak_1232	203	.	13.2804	24.5127	20.3738	45	FALSE
chr11	8709476	8709624	Nanog_256_peak_1233	194	.	12.9454	23.5484	19.4496	67	FALSE
chr11	10157397	10157781	Nanog_256_peak_1244	161	.	10.5042	20.1295	16.1904	316	FALSE
chr11	10376562	10376913	Nanog_256_peak_1248	212	.	11.712	25.4587	21.2786	283	TRUE
chr11	10515870	10516161	Nanog_256_peak_1251	195	.	11.9891	23.6446	19.5405	200	TRUE
chr11	10624571	10624813	Nanog_256_peak_1252	180	.	11.3921	22.1187	18.083	148	FALSE
chr11	11215430	11215665	Nanog_256_peak_1260	626	.	24.8445	68.1111	62.679	152	TRUE
chr11	11578499	11578686	Nanog_256_peak_1263	274	.	15.5188	31.8801	27.445	73	FALSE
chr11	11583577	11583807	Nanog_256_peak_1264	209	.	13.1261	25.0719	20.9091	119	TRUE
chr11	11731495	11731708	Nanog_256_peak_1265	215	.	13.2521	25.786	21.5911	131	TRUE
chr11	12007845	12008144	Nanog_256_peak_1270	229	.	13.4183	27.1489	22.9011	119	FALSE
chr11	12865092	12865251	Nanog_256_peak_1272	176	.	11.7246	21.704	17.6887	51	FALSE
chr11	13747526	13748382	Nanog_256_peak_1277	329	.	11.7316	37.5666	32.9245	431	TRUE
chr11	14813022	14813152	Nanog_256_peak_1285	203	.	13.2431	24.4418	20.3054	46	FALSE
chr11	15064888	15065049	Nanog_256_peak_1286	341	.	18.7795	38.837	34.1491	81	TRUE
chr11	15113913	15114015	Nanog_256_peak_1288	162	.	10.8585	20.2291	16.2843	60	FALSE
chr11	16928184	16928487	Nanog_256_peak_1304	142	.	10.099	18.0467	14.2127	253	FALSE
chr11	17371326	17371519	Nanog_256_peak_1308	311	.	16.3038	35.6917	31.1176	72	TRUE
chr11	17839713	17839803	Nanog_256_peak_1314	174	.	12.1089	21.4095	17.408	56	FALSE
chr11	17907415	17907618	Nanog_256_peak_1315	203	.	12.4873	24.482	20.3443	64	FALSE
chr11	18713926	18714115	Nanog_256_peak_1323	223	.	11.991	26.5292	22.3058	66	TRUE
chr11	18740734	18741245	Nanog_256_peak_1325	434	.	16.0687	48.3862	43.4227	109	TRUE
chr11	18998599	18998780	Nanog_256_peak_1330	374	.	18.5736	42.255	37.4587	101	FALSE
chr11	19723146	19723369	Nanog_256_peak_1335	190	.	12.3108	23.1782	19.0964	109	TRUE
chr11	19948126	19948293	Nanog_256_peak_1343	474	.	22.0059	52.5111	47.4366	50	FALSE
chr11	20475275	20475474	Nanog_256_peak_1350	218	.	10.025	26.0181	21.8151	131	FALSE
chr11	20479611	20479971	Nanog_256_peak_1351	360	.	13.2714	40.7558	36.0062	227	FALSE
chr11	21235553	21235851	Nanog_256_peak_1359	161	.	11.0557	20.1084	16.1698	229	FALSE
chr11	21586196	21586328	Nanog_256_peak_1362	171	.	11.0941	21.1113	17.1248	94	FALSE
chr11	21612077	21612304	Nanog_256_peak_1363	271	.	13.483	31.5891	27.1648	102	TRUE
chr11	22234082	22234216	Nanog_256_peak_1370	138	.	10.4316	17.6734	13.859	58	TRUE
chr11	22701691	22702037	Nanog_256_peak_1375	178	.	11.5616	21.897	17.8725	226	FALSE
chr11	23696461	23696628	Nanog_256_peak_1386	196	.	12.6256	23.7273	19.6194	72	FALSE
chr11	24068066	24068393	Nanog_256_peak_1391	413	.	13.1993	46.2144	41.3043	187	TRUE
chr11	24123875	24124290	Nanog_256_peak_1392	160	.	10.3937	19.9463	16.016	205	TRUE
chr11	24849798	24850028	Nanog_256_peak_1400	255	.	14.3606	29.9025	25.5435	92	TRUE
chr11	24940492	24940716	Nanog_256_peak_1401	341	.	17.3556	38.8062	34.119	103	TRUE
chr11	25001760	25001967	Nanog_256_peak_1404	214	.	11.4689	25.6422	21.454	78	TRUE
chr11	25044488	25044800	Nanog_256_peak_1406	174	.	10.6654	21.4409	17.4383	171	FALSE
chr11	25256903	25257384	Nanog_256_peak_1409	594	.	15.4477	64.7764	59.4055	175	FALSE
chr11	25273913	25274243	Nanog_256_peak_1410	281	.	12.939	32.6233	28.1624	140	FALSE
chr11	25965349	25965688	Nanog_256_peak_1414	148	.	10.2212	18.6944	14.8257	220	TRUE
chr11	27615413	27615624	Nanog_256_peak_1424	187	.	12.0997	22.8139	18.7466	100	FALSE
chr11	27625162	27625403	Nanog_256_peak_1425	247	.	13.1368	29.0781	24.75	91	FALSE
chr11	27965268	27965716	Nanog_256_peak_1429	951	.	24.6361	101.172	95.1379	234	TRUE
chr11	28800331	28800876	Nanog_256_peak_1432	400	.	13.2474	44.9116	40.0322	409	FALSE
chr11	30341338	30341557	Nanog_256_peak_1450	185	.	12.2434	22.6126	18.5538	74	FALSE
chr11	30399073	30399355	Nanog_256_peak_1451	280	.	13.6356	32.5101	28.0528	135	TRUE
chr11	30417945	30418227	Nanog_256_peak_1452	212	.	13.0287	25.4022	21.2243	224	FALSE
chr11	30539443	30539581	Nanog_256_peak_1453	161	.	11.0557	20.1084	16.1698	74	FALSE
chr11	31033664	31033849	Nanog_256_peak_1458	411	.	18.6588	46.0627	41.1553	151	TRUE
chr11	31041970	31042188	Nanog_256_peak_1459	260	.	13.5637	30.4298	26.048	151	FALSE
chr11	31324284	31324398	Nanog_256_peak_1462	145	.	10.5441	18.4239	14.5693	65	FALSE
chr11	31698473	31698695	Nanog_256_peak_1468	151	.	11.0292	19.0425	15.1569	113	FALSE
chr11	33117174	33117350	Nanog_256_peak_1480	186	.	12.0702	22.7631	18.6979	97	TRUE
chr11	35048567	35048996	Nanog_256_peak_1489	944	.	21.8529	100.518	94.4952	312	TRUE
chr11	35066211	35066503	Nanog_256_peak_1491	505	.	18.7233	55.6763	50.5144	126	FALSE
chr11	35066865	35066970	Nanog_256_peak_1492	214	.	10.8019	25.6772	21.4872	40	FALSE
chr11	35141473	35141816	Nanog_256_peak_1497	1356	.	26.2876	142.038	135.601	162	FALSE
chr11	35619369	35619511	Nanog_256_peak_1502	129	.	10.0023	16.6783	12.9167	66	TRUE
chr11	36183115	36183338	Nanog_256_peak_1506	179	.	12.264	21.9391	17.9125	135	FALSE
chr11	36286209	36286346	Nanog_256_peak_1509	135	.	10.1105	17.3136	13.518	56	FALSE
chr11	36510408	36510564	Nanog_256_peak_1514	134	.	10.22	17.2571	13.4643	59	TRUE
chr11	36768665	36769017	Nanog_256_peak_1516	137	.	10.2482	17.5633	13.7546	101	FALSE
chr11	37997474	37997703	Nanog_256_peak_1519	168	.	11.6884	20.8454	16.8722	180	TRUE
chr11	38144683	38144886	Nanog_256_peak_1522	266	.	15.0409	31.0584	26.6538	114	FALSE
chr11	39847536	39847798	Nanog_256_peak_1532	144	.	10.2706	18.3377	14.4871	83	FALSE
chr11	40727849	40728023	Nanog_256_peak_1538	160	.	11.1939	19.9458	16.0158	65	FALSE
chr11	42255237	42255454	Nanog_256_peak_1556	174	.	11.5518	21.4062	17.405	134	TRUE
chr11	42643153	42643350	Nanog_256_peak_1561	183	.	11.8672	22.4157	18.3663	111	FALSE
chr11	43224778	43225014	Nanog_256_peak_1569	164	.	11.5827	20.3532	16.4021	185	FALSE
chr11	44226788	44226949	Nanog_256_peak_1575	165	.	11.5292	20.5523	16.5923	111	FALSE
chr11	44503547	44503695	Nanog_256_peak_1577	177	.	12.1934	21.8017	17.7818	107	FALSE
chr12	52188	52494	Nanog_256_peak_1587	149	.	10.2682	18.773	14.9008	152	TRUE
chr12	290303	290674	Nanog_256_peak_1592	284	.	11.3867	32.9688	28.4948	286	TRUE
chr12	3199248	3199358	Nanog_256_peak_1628	191	.	12.7971	23.2607	19.1754	68	FALSE
chr12	3206344	3206561	Nanog_256_peak_1629	232	.	10.8218	27.518	23.2554	180	FALSE
chr12	3207405	3207701	Nanog_256_peak_1630	243	.	11.0879	28.6238	24.3161	226	FALSE
chr12	3800076	3800299	Nanog_256_peak_1637	160	.	10.3937	19.9463	16.016	70	TRUE
chr12	3864775	3864936	Nanog_256_peak_1639	207	.	13.5093	24.9516	20.7946	55	FALSE
chr12	5716200	5716538	Nanog_256_peak_1652	283	.	11.9932	32.8617	28.3912	134	TRUE
chr12	6704967	6705210	Nanog_256_peak_1672	297	.	14.6941	34.3137	29.7901	142	TRUE
chr12	6805947	6806191	Nanog_256_peak_1675	144	.	10.4888	18.3256	14.4754	190	FALSE
chr12	8140616	8140905	Nanog_256_peak_1681	197	.	10.4167	23.8248	19.7121	148	TRUE
chr12	8145027	8145217	Nanog_256_peak_1682	243	.	11.461	28.6881	24.377	41	FALSE
chr12	8822543	8822664	Nanog_256_peak_1686	233	.	13.6678	27.5713	23.3061	67	FALSE
chr12	8944167	8944348	Nanog_256_peak_1688	297	.	13.4781	34.2491	29.7272	91	TRUE
chr12	9013396	9013724	Nanog_256_peak_1692	181	.	11.7542	22.2233	18.1832	183	FALSE
chr12	9437092	9437349	Nanog_256_peak_1696	453	.	18.456	50.3758	45.3606	177	TRUE
chr12	9471612	9471778	Nanog_256_peak_1698	168	.	10.8983	20.7844	16.8139	84	FALSE
chr12	10063312	10063514	Nanog_256_peak_1700	172	.	11.7228	21.2753	17.2805	134	FALSE
chr12	11080614	11080761	Nanog_256_peak_1713	155	.	10.3793	19.4283	15.5247	59	FALSE
chr12	12060222	12060436	Nanog_256_peak_1721	288	.	17.0433	33.3024	28.8173	49	FALSE
chr12	12219756	12219963	Nanog_256_peak_1725	159	.	11.1644	19.893	15.9657	118	FALSE
chr12	12358663	12358860	Nanog_256_peak_1728	299	.	14.778	34.4558	29.9262	75	TRUE
chr12	13151918	13152103	Nanog_256_peak_1733	220	.	12.9171	26.3059	22.0905	117	TRUE
chr12	13728870	13729299	Nanog_256_peak_1738	736	.	16.8106	79.3074	73.6517	280	TRUE
chr12	14212421	14212569	Nanog_256_peak_1740	168	.	10.9466	20.865	16.8908	62	FALSE
chr12	14390819	14391022	Nanog_256_peak_1745	237	.	14.7333	28.0087	23.7255	82	FALSE
chr12	15265972	15266061	Nanog_256_peak_1749	193	.	13.0397	23.4738	19.3783	38	FALSE
chr12	16283940	16284049	Nanog_256_peak_1754	150	.	10.3394	18.8924	15.0144	67	FALSE
chr12	16433218	16433327	Nanog_256_peak_1756	169	.	11.302	20.979	16.9997	62	TRUE
chr12	17067063	17067280	Nanog_256_peak_1760	307	.	15.6731	35.2907	30.7307	73	FALSE
chr12	17754774	17754951	Nanog_256_peak_1769	225	.	13.828	26.7892	22.5549	96	FALSE
chr12	18886837	18887000	Nanog_256_peak_1776	164	.	10.9342	20.3564	16.4048	92	TRUE
chr12	20329726	20329911	Nanog_256_peak_1792	157	.	10.4951	19.6211	15.7076	110	FALSE
chr12	20743549	20743723	Nanog_256_peak_1796	377	.	18.3587	42.5996	37.7908	108	TRUE
chr12	20907535	20907690	Nanog_256_peak_1798	159	.	10.9206	19.8766	15.9502	92	TRUE
chr12	21262033	21262259	Nanog_256_peak_1800	164	.	11.5827	20.3532	16.4021	153	FALSE
chr12	22604263	22604499	Nanog_256_peak_1809	141	.	10.4765	17.9839	14.1535	115	TRUE
chr12	23261491	23261831	Nanog_256_peak_1814	310	.	15.8714	35.6246	31.0537	149	FALSE
chr12	23420681	23421064	Nanog_256_peak_1818	631	.	14.838	68.5692	63.1291	152	FALSE
chr12	23437825	23438182	Nanog_256_peak_1821	228	.	11.9409	27.0531	22.8086	290	FALSE
chr12	23731394	23731664	Nanog_256_peak_1824	229	.	13.1168	27.2191	22.9689	173	TRUE
chr12	23754920	23755117	Nanog_256_peak_1825	152	.	10.4605	19.0958	15.2075	69	FALSE
chr12	24059628	24059836	Nanog_256_peak_1827	155	.	10.1169	19.4881	15.5808	70	TRUE
chr12	24343125	24343563	Nanog_256_peak_1833	236	.	10.7308	27.955	23.6743	278	FALSE
chr12	25040916	25041210	Nanog_256_peak_1837	225	.	12.8684	26.8035	22.5685	113	TRUE
chr12	25482849	25483055	Nanog_256_peak_1843	137	.	10.0663	17.5857	13.7757	65	FALSE
chr12	25813375	25813640	Nanog_256_peak_1853	184	.	10.9563	22.4708	18.4184	144	FALSE
chr12	27118264	27118448	Nanog_256_peak_1867	170	.	10.7084	20.9816	17.0018	44	TRUE
chr12	27285483	27285759	Nanog_256_peak_1874	272	.	14.3353	31.7272	27.2982	84	FALSE
chr12	27553085	27553476	Nanog_256_peak_1879	426	.	15.2485	47.5657	42.6232	156	FALSE
chr12	27925796	27925939	Nanog_256_peak_1881	158	.	11.0767	19.7371	15.818	76	TRUE
chr12	28822011	28822329	Nanog_256_peak_1894	319	.	13.9821	36.5164	31.9116	150	FALSE
chr12	28886724	28886999	Nanog_256_peak_1897	258	.	13.0617	30.2211	25.8476	179	FALSE
chr12	29055179	29055393	Nanog_256_peak_1903	246	.	13.4617	29.0011	24.6766	130	FALSE
chr12	29234688	29234917	Nanog_256_peak_1906	280	.	12.1674	32.5377	28.0794	99	FALSE
chr12	29236053	29236264	Nanog_256_peak_1907	354	.	14.0815	40.2136	35.4824	131	TRUE
chr12	29590657	29591230	Nanog_256_peak_1910	193	.	11.1955	23.4306	19.3376	93	TRUE
chr12	30060750	30060884	Nanog_256_peak_1917	202	.	12.707	24.3439	20.2116	48	FALSE
chr12	30158435	30158645	Nanog_256_peak_1918	141	.	10.2732	17.9456	14.1172	157	FALSE
chr12	31739259	31739560	Nanog_256_peak_1929	178	.	11.2436	21.871	17.8476	134	FALSE
chr12	32486182	32486480	Nanog_256_peak_1938	219	.	12.8325	26.1642	21.9551	92	TRUE
chr12	34731075	34731398	Nanog_256_peak_1957	362	.	12.7389	41.047	36.2861	120	FALSE
chr12	35885381	35885481	Nanog_256_peak_1969	170	.	11.9283	21.0395	17.0559	59	FALSE
chr12	37446915	37447305	Nanog_256_peak_1981	520	.	19.142	57.2579	52.053	136	FALSE
chr12	37678188	37678370	Nanog_256_peak_1983	162	.	11.516	20.2237	16.2794	108	FALSE
chr12	38462113	38462424	Nanog_256_peak_1984	229	.	13.4183	27.1489	22.9011	163	TRUE
chr12	38508660	38508931	Nanog_256_peak_1986	213	.	12.4521	25.5279	21.3446	109	TRUE
chr12	38815513	38815679	Nanog_256_peak_1990	181	.	12.4078	22.2217	18.1819	56	TRUE
chr12	43442550	43442833	Nanog_256_peak_2026	265	.	14.6279	30.9587	26.5576	161	FALSE
chr12	43656539	43656754	Nanog_256_peak_2030	310	.	17.0007	35.6307	31.0596	126	FALSE
chr12	44361665	44362070	Nanog_256_peak_2035	372	.	17.5731	41.9945	37.2049	276	FALSE
chr12	44637015	44637255	Nanog_256_peak_2036	170	.	11.9283	21.0395	17.0559	75	TRUE
chr12	44707920	44708093	Nanog_256_peak_2038	271	.	16.3331	31.5327	27.1099	90	FALSE
chr12	46650949	46651379	Nanog_256_peak_2053	302	.	14.5604	34.7657	30.2262	252	TRUE
chr12	47132888	47133008	Nanog_256_peak_2058	131	.	10.1253	16.9359	13.1595	62	TRUE
chr12	47651143	47651409	Nanog_256_peak_2065	402	.	17.687	45.1653	40.281	161	FALSE
chr12	47660408	47660820	Nanog_256_peak_2066	758	.	20.1915	81.5229	75.8308	221	FALSE
chr12	47670435	47670806	Nanog_256_peak_2067	339	.	11.071	38.6748	33.9933	207	FALSE
chr12	47674877	47675214	Nanog_256_peak_2068	470	.	14.2438	52.1469	47.081	130	FALSE
chr12	48152766	48153197	Nanog_256_peak_2073	180	.	10.4031	22.0986	18.0635	224	FALSE
chr12	48197464	48197941	Nanog_256_peak_2076	294	.	12.602	34.0051	29.4933	200	FALSE
chr12	48339843	48340092	Nanog_256_peak_2080	224	.	13.1482	26.6939	22.4639	168	FALSE
chr12	48644352	48644442	Nanog_256_peak_2084	167	.	11.6242	20.7268	16.7599	49	FALSE
chr13	186462	186704	Nanog_256_peak_2096	263	.	15.7586	30.767	26.3716	66	FALSE
chr13	252397	252497	Nanog_256_peak_2098	136	.	10.1927	17.4623	13.6587	35	FALSE
chr13	1026993	1027181	Nanog_256_peak_2112	228	.	11.6394	27.1474	22.8998	140	FALSE
chr13	1100557	1100788	Nanog_256_peak_2114	165	.	10.7092	20.4698	16.514	90	FALSE
chr13	1181549	1181831	Nanog_256_peak_2118	367	.	15.1924	41.5374	36.7625	98	FALSE
chr13	1503513	1503768	Nanog_256_peak_2124	149	.	10.5259	18.7749	14.9024	161	FALSE
chr13	1951086	1951826	Nanog_256_peak_2128	339	.	11.3073	38.5799	33.9011	572	TRUE
chr13	3022881	3023156	Nanog_256_peak_2142	231	.	10.423	27.3708	23.114	183	FALSE
chr13	3153551	3153987	Nanog_256_peak_2147	426	.	12.9003	47.6373	42.6923	264	FALSE
chr13	3158914	3159236	Nanog_256_peak_2149	333	.	11.9255	37.9805	33.3218	137	FALSE
chr13	3878749	3879057	Nanog_256_peak_2157	162	.	10.8086	20.1453	16.2055	118	FALSE
chr13	4034614	4034824	Nanog_256_peak_2158	133	.	10.132	17.087	13.303	44	FALSE
chr13	4667628	4667733	Nanog_256_peak_2163	157	.	11.225	19.6687	15.753	20	FALSE
chr13	5488894	5489266	Nanog_256_peak_2165	183	.	11.5446	22.3735	18.3261	285	FALSE
chr13	5902013	5902271	Nanog_256_peak_2167	430	.	18.0225	48.0501	43.0953	106	TRUE
chr13	5935407	5935862	Nanog_256_peak_2168	254	.	13.1835	29.7883	25.4334	264	FALSE
chr13	6176627	6176846	Nanog_256_peak_2170	155	.	11.1312	19.4931	15.5855	163	TRUE
chr13	7025280	7025601	Nanog_256_peak_2172	231	.	12.8756	27.4106	23.1524	231	FALSE
chr13	8613691	8613846	Nanog_256_peak_2184	141	.	10.5809	17.9398	14.1119	58	TRUE
chr13	9332295	9332393	Nanog_256_peak_2188	167	.	11.7876	20.7569	16.7877	53	FALSE
chr13	9357453	9357603	Nanog_256_peak_2189	245	.	14.7304	28.8827	24.5627	61	FALSE
chr13	9362981	9363250	Nanog_256_peak_2190	612	.	22.4858	66.6556	61.2465	121	TRUE
chr13	10093854	10094180	Nanog_256_peak_2194	328	.	16.1483	37.4555	32.8176	244	TRUE
chr13	10254591	10254742	Nanog_256_peak_2197	178	.	10.5864	21.8533	17.8306	51	FALSE
chr13	11480669	11481103	Nanog_256_peak_2203	187	.	11.4802	22.7954	18.7289	267	FALSE
chr13	11756045	11756233	Nanog_256_peak_2206	208	.	13.0929	25.0138	20.8537	63	TRUE
chr13	12160149	12160262	Nanog_256_peak_2207	164	.	11.4358	20.3819	16.4294	39	TRUE
chr13	12695923	12696537	Nanog_256_peak_2210	217	.	11.27	25.8997	21.701	116	FALSE
chr13	12931396	12931657	Nanog_256_peak_2212	275	.	14.8858	32.0147	27.5747	128	FALSE
chr13	13029762	13030013	Nanog_256_peak_2214	338	.	14.7185	38.5287	33.8526	133	TRUE
chr13	13944995	13945166	Nanog_256_peak_2216	204	.	12.5744	24.6291	20.4855	75	FALSE
chr13	14936450	14936742	Nanog_256_peak_2226	453	.	18.0269	50.4104	45.3946	176	FALSE
chr13	14941697	14941954	Nanog_256_peak_2227	203	.	10.7922	24.4789	20.3415	146	FALSE
chr13	14969667	14969978	Nanog_256_peak_2229	676	.	14.347	73.2064	67.6661	121	FALSE
chr13	14975831	14976058	Nanog_256_peak_2231	357	.	11.876	40.5226	35.7813	125	TRUE
chr13	14982353	14982921	Nanog_256_peak_2232	401	.	13.3195	45.0673	40.1846	441	TRUE
chr13	15166463	15166706	Nanog_256_peak_2240	192	.	11.153	23.3595	19.2695	77	TRUE
chr13	15221017	15221358	Nanog_256_peak_2241	257	.	12.6025	30.0746	25.7071	98	TRUE
chr13	15498910	15499025	Nanog_256_peak_2242	210	.	13.8068	25.247	21.0753	72	FALSE
chr13	15581749	15581856	Nanog_256_peak_2243	138	.	10.1172	17.6739	13.8592	53	FALSE
chr13	15864689	15864967	Nanog_256_peak_2247	158	.	10.5896	19.7788	15.8579	75	FALSE
chr13	16191452	16191635	Nanog_256_peak_2251	213	.	10.0725	25.5248	21.342	112	FALSE
chr13	16466294	16466458	Nanog_256_peak_2257	144	.	10.6544	18.3181	14.4683	35	FALSE
chr13	16489223	16489608	Nanog_256_peak_2258	516	.	19.3759	56.8575	51.6609	244	FALSE
chr13	17012572	17013243	Nanog_256_peak_2262	235	.	12.4192	27.8668	23.5903	501	TRUE
chr13	17466364	17466723	Nanog_256_peak_2268	551	.	17.8131	60.4653	55.1878	149	FALSE
chr13	18221672	18222001	Nanog_256_peak_2274	289	.	13.4243	33.4799	28.9871	247	FALSE
chr13	19523571	19523662	Nanog_256_peak_2284	144	.	10.4888	18.3256	14.4754	49	TRUE
chr13	19737786	19738082	Nanog_256_peak_2287	234	.	12.7083	27.738	23.4671	177	FALSE
chr13	20357500	20357831	Nanog_256_peak_2296	376	.	16.528	42.42	37.6179	100	FALSE
chr13	20375516	20375695	Nanog_256_peak_2297	165	.	11.6502	20.4852	16.5289	121	FALSE
chr13	20907775	20908013	Nanog_256_peak_2301	206	.	12.0193	24.8059	20.6553	175	TRUE
chr13	20979946	20980226	Nanog_256_peak_2302	391	.	17.4476	44.0009	39.1497	131	TRUE
chr13	22295357	22295604	Nanog_256_peak_2319	248	.	12.8008	29.1399	24.8101	134	TRUE
chr13	22557156	22557481	Nanog_256_peak_2321	171	.	10.8203	21.1674	17.1779	273	FALSE
chr13	22660418	22660662	Nanog_256_peak_2324	169	.	10.0403	20.9366	16.9594	123	FALSE
chr13	22661789	22662042	Nanog_256_peak_2325	235	.	12.3742	27.7904	23.5173	172	TRUE
chr13	22961512	22961644	Nanog_256_peak_2326	224	.	13.7576	26.6654	22.4369	81	FALSE
chr13	23026286	23026544	Nanog_256_peak_2327	164	.	10.663	20.393	16.44	99	FALSE
chr13	23090052	23090148	Nanog_256_peak_2328	158	.	11.2566	19.7282	15.8097	33	TRUE
chr13	24661315	24661485	Nanog_256_peak_2346	402	.	16.8219	45.1827	40.2981	59	TRUE
chr13	24832278	24832487	Nanog_256_peak_2351	142	.	10.3799	18.133	14.2942	66	TRUE
chr13	25549245	25549382	Nanog_256_peak_2362	164	.	11.2506	20.4452	16.4902	72	FALSE
chr13	26035324	26035613	Nanog_256_peak_2368	261	.	13.2757	30.5855	26.1977	122	FALSE
chr13	26372839	26373123	Nanog_256_peak_2372	200	.	10.6354	24.2066	20.0787	197	FALSE
chr13	27094750	27095112	Nanog_256_peak_2380	239	.	12.2454	28.1925	23.9025	130	TRUE
chr13	27116270	27116508	Nanog_256_peak_2382	179	.	10.9681	21.944	17.917	155	FALSE
chr13	27785203	27785334	Nanog_256_peak_2387	268	.	14.4444	31.2728	26.8595	68	FALSE
chr13	27822573	27822885	Nanog_256_peak_2389	192	.	11.4682	23.3235	19.2357	199	TRUE
chr13	27851605	27851717	Nanog_256_peak_2391	239	.	14.8602	28.2537	23.9608	36	FALSE
chr13	27925652	27925833	Nanog_256_peak_2393	159	.	10.9474	19.9224	15.9933	59	FALSE
chr13	27986648	27986914	Nanog_256_peak_2395	254	.	13.5545	29.7798	25.4254	137	FALSE
chr13	28293439	28293554	Nanog_256_peak_2398	149	.	10.7714	18.832	14.9566	53	TRUE
chr13	28494837	28495058	Nanog_256_peak_2402	222	.	11.6155	26.4957	22.2733	128	FALSE
chr13	28528762	28529008	Nanog_256_peak_2403	183	.	12.1486	22.4447	18.394	190	TRUE
chr13	29014417	29014597	Nanog_256_peak_2410	163	.	10.9089	20.3137	16.3653	115	TRUE
chr13	29591962	29592142	Nanog_256_peak_2413	516	.	22.2064	56.8167	51.6211	102	TRUE
chr13	30302407	30302543	Nanog_256_peak_2427	262	.	13.6688	30.6069	26.2178	71	TRUE
chr13	30804894	30805369	Nanog_256_peak_2429	569	.	15.3793	62.3	56.9819	300	FALSE
chr13	30814870	30815148	Nanog_256_peak_2431	369	.	16.159	41.7801	36.9968	130	FALSE
chr13	30914674	30914902	Nanog_256_peak_2437	240	.	12.673	28.2963	24.0014	69	FALSE
chr13	32145976	32146391	Nanog_256_peak_2449	512	.	14.5124	56.4646	51.2808	188	TRUE
chr13	32739797	32740203	Nanog_256_peak_2457	192	.	11.4682	23.3235	19.2357	160	TRUE
chr13	33281730	33281901	Nanog_256_peak_2466	159	.	10.9474	19.9224	15.9933	42	TRUE
chr13	33487742	33487882	Nanog_256_peak_2467	233	.	11.5327	27.5761	23.3106	91	FALSE
chr13	33820490	33820673	Nanog_256_peak_2474	196	.	11.3907	23.7569	19.6476	91	FALSE
chr13	34009369	34009707	Nanog_256_peak_2477	162	.	10.8335	20.1871	16.2452	81	FALSE
chr13	34366562	34366769	Nanog_256_peak_2481	169	.	10.0047	20.8766	16.9021	112	TRUE
chr13	35024738	35025066	Nanog_256_peak_2492	317	.	15.5214	36.397	31.7982	253	TRUE
chr13	35388859	35388989	Nanog_256_peak_2495	165	.	11.5292	20.5523	16.5923	17	FALSE
chr13	35760929	35761148	Nanog_256_peak_2499	209	.	12.5661	25.1559	20.9886	82	FALSE
chr13	35892174	35892330	Nanog_256_peak_2500	192	.	12.1121	23.3282	19.2397	63	TRUE
chr13	35908209	35908470	Nanog_256_peak_2502	321	.	14.1146	36.7526	32.1387	192	TRUE
chr13	36028367	36028794	Nanog_256_peak_2506	404	.	16.9346	45.3807	40.4903	348	FALSE
chr13	36536504	36536754	Nanog_256_peak_2510	218	.	12.0452	26.0195	21.8162	189	FALSE
chr13	36920028	36920205	Nanog_256_peak_2513	207	.	11.3559	24.857	20.704	88	FALSE
chr13	36939777	36940062	Nanog_256_peak_2514	515	.	21.1728	56.6985	51.5067	126	FALSE
chr13	36957612	36957856	Nanog_256_peak_2515	416	.	16.7411	46.5629	41.6445	117	FALSE
chr13	36962692	36963021	Nanog_256_peak_2516	302	.	14.1634	34.767	30.2273	177	FALSE
chr13	37465577	37465666	Nanog_256_peak_2523	137	.	10.2482	17.5633	13.7546	35	FALSE
chr13	39106908	39107239	Nanog_256_peak_2535	180	.	11.0578	22.093	18.0584	154	FALSE
chr13	39124376	39124558	Nanog_256_peak_2536	226	.	13.5951	26.8991	22.6597	80	FALSE
chr13	39366625	39366942	Nanog_256_peak_2538	144	.	10.2457	18.2954	14.4485	178	FALSE
chr13	40437345	40437537	Nanog_256_peak_2545	188	.	12.4377	22.9591	18.8858	102	FALSE
chr13	40686364	40686778	Nanog_256_peak_2552	214	.	12.8522	25.637	21.449	257	FALSE
chr13	40751189	40751385	Nanog_256_peak_2555	134	.	10.0565	17.2164	13.4257	33	FALSE
chr13	40771417	40771621	Nanog_256_peak_2557	292	.	13.2049	33.7636	29.261	42	FALSE
chr13	41745246	41745493	Nanog_256_peak_2562	216	.	11.5696	25.8139	21.6179	111	FALSE
chr13	41765952	41766196	Nanog_256_peak_2563	185	.	12.4408	22.5844	18.5273	145	FALSE
chr13	42005578	42005748	Nanog_256_peak_2570	162	.	10.2218	20.1748	16.2334	48	FALSE
chr13	42406892	42407039	Nanog_256_peak_2576	163	.	11.1942	20.3475	16.3967	63	FALSE
chr13	45010349	45010437	Nanog_256_peak_2599	195	.	13.0208	23.6963	19.59	42	TRUE
chr13	45155832	45155943	Nanog_256_peak_2603	196	.	12.8804	23.7641	19.6543	52	FALSE
chr13	45648054	45648346	Nanog_256_peak_2606	254	.	14.6574	29.8241	25.4681	75	FALSE
chr13	46021569	46021995	Nanog_256_peak_2608	308	.	12.6414	35.416	30.8514	137	FALSE
chr13	46927412	46927727	Nanog_256_peak_2620	641	.	17.8557	69.5727	64.1093	141	FALSE
chr13	46973530	46974063	Nanog_256_peak_2623	294	.	14.5019	33.9879	29.4766	169	FALSE
chr13	50605429	50605783	Nanog_256_peak_2652	381	.	15.9789	42.9434	38.1244	205	FALSE
chr13	50614679	50615177	Nanog_256_peak_2653	709	.	16.0805	76.5654	70.9618	134	FALSE
chr13	50624155	50624399	Nanog_256_peak_2655	657	.	12.8219	71.3023	65.7989	97	TRUE
chr13	50625328	50625715	Nanog_256_peak_2656	1013	.	16.9691	107.443	101.316	142	FALSE
chr13	51236418	51236573	Nanog_256_peak_2659	166	.	11.7893	20.6208	16.6578	90	TRUE
chr13	51887201	51887451	Nanog_256_peak_2670	276	.	15.958	32.0988	27.6549	123	FALSE
chr14	14735	14964	Nanog_256_peak_2673	264	.	11.6113	30.8543	26.4558	82	FALSE
chr14	48916	49149	Nanog_256_peak_2675	318	.	15.5819	36.4993	31.8956	126	FALSE
chr14	81032	81177	Nanog_256_peak_2677	141	.	10.4765	17.9839	14.1535	64	FALSE
chr14	212515	212717	Nanog_256_peak_2678	254	.	12.8318	29.8285	25.4721	81	FALSE
chr14	502401	502701	Nanog_256_peak_2684	251	.	13.0374	29.541	25.1937	66	TRUE
chr14	1605979	1606158	Nanog_256_peak_2700	285	.	15.861	33.057	28.5797	59	TRUE
chr14	1903477	1903641	Nanog_256_peak_2708	200	.	12.8891	24.1933	20.0659	77	FALSE
chr14	2233802	2233965	Nanog_256_peak_2713	144	.	10.6544	18.3181	14.4683	81	FALSE
chr14	3729357	3729544	Nanog_256_peak_2725	141	.	10.4765	17.9839	14.1535	138	TRUE
chr14	4587870	4588149	Nanog_256_peak_2735	172	.	10.2036	21.2116	17.2203	118	FALSE
chr14	5686703	5686907	Nanog_256_peak_2748	189	.	11.6283	23.042	18.9657	127	TRUE
chr14	6030223	6030384	Nanog_256_peak_2754	286	.	16.5184	33.1138	28.6343	91	FALSE
chr14	6429349	6429519	Nanog_256_peak_2757	353	.	18.8303	40.0637	35.3382	89	FALSE
chr14	6509234	6510032	Nanog_256_peak_2759	329	.	13.0456	37.546	32.9056	682	TRUE
chr14	6661309	6661501	Nanog_256_peak_2761	152	.	10.7668	19.1922	15.2988	79	TRUE
chr14	6696178	6696331	Nanog_256_peak_2762	144	.	10.6544	18.3181	14.4683	87	FALSE
chr14	6954556	6954796	Nanog_256_peak_2764	292	.	15.9287	33.7809	29.2779	161	TRUE
chr14	10525618	10525811	Nanog_256_peak_2786	208	.	12.1184	24.9712	20.8133	39	TRUE
chr14	11282439	11282602	Nanog_256_peak_2790	189	.	12.6521	22.9832	18.9088	98	TRUE
chr14	12020085	12020241	Nanog_256_peak_2793	214	.	12.8522	25.637	21.449	58	TRUE
chr14	13679449	13679610	Nanog_256_peak_2803	225	.	14.308	26.8327	22.5963	47	FALSE
chr14	14063515	14063626	Nanog_256_peak_2805	136	.	10.0159	17.4986	13.6926	45	FALSE
chr14	15486188	15486287	Nanog_256_peak_2820	244	.	15.2349	28.7278	24.4149	46	FALSE
chr14	16013194	16013387	Nanog_256_peak_2826	163	.	11.1384	20.2509	16.3049	126	FALSE
chr14	16217221	16217532	Nanog_256_peak_2828	310	.	15.0539	35.6052	31.0355	177	FALSE
chr14	16763595	16763707	Nanog_256_peak_2833	221	.	13.2754	26.3533	22.1357	42	FALSE
chr14	16952962	16953067	Nanog_256_peak_2836	154	.	11.0696	19.3785	15.4771	63	FALSE
chr14	18000096	18000252	Nanog_256_peak_2850	137	.	10.2482	17.5633	13.7546	90	FALSE
chr14	18585492	18585679	Nanog_256_peak_2855	169	.	11.5411	20.9535	16.9752	58	TRUE
chr14	18779294	18779744	Nanog_256_peak_2856	251	.	13.3948	29.5117	25.1656	144	FALSE
chr14	20351170	20351312	Nanog_256_peak_2876	137	.	10.2204	17.5126	13.7063	62	TRUE
chr14	21109753	21109942	Nanog_256_peak_2880	410	.	19.0619	45.9912	41.0868	83	FALSE
chr14	21140024	21140615	Nanog_256_peak_2881	365	.	13.2036	41.3162	36.5466	193	FALSE
chr14	21145667	21145814	Nanog_256_peak_2882	160	.	10.4376	20.0191	16.085	85	FALSE
chr14	22021837	22021980	Nanog_256_peak_2887	184	.	12.555	22.5154	18.4612	49	FALSE
chr14	22196999	22197351	Nanog_256_peak_2891	159	.	10.3719	19.9101	15.9817	201	FALSE
chr14	22975408	22975519	Nanog_256_peak_2898	162	.	11.5718	20.1517	16.2116	59	FALSE
chr14	23505349	23505571	Nanog_256_peak_2904	290	.	16.1726	33.5956	29.0978	140	TRUE
chr14	24572828	24572997	Nanog_256_peak_2917	234	.	14.5673	27.6918	23.4223	131	TRUE
chr14	24836393	24836709	Nanog_256_peak_2921	260	.	12.8171	30.4461	26.0635	137	TRUE
chr14	24935944	24936151	Nanog_256_peak_2924	191	.	10.7621	23.2705	19.1849	80	FALSE
chr14	25628482	25628623	Nanog_256_peak_2934	144	.	10.6243	18.2612	14.4163	80	FALSE
chr14	25757245	25757436	Nanog_256_peak_2935	218	.	13.9052	26.0567	21.852	125	TRUE
chr14	26324977	26325259	Nanog_256_peak_2944	213	.	12.4785	25.572	21.3868	60	TRUE
chr14	28835144	28835317	Nanog_256_peak_2970	159	.	10.9206	19.8766	15.9502	97	FALSE
chr14	30542638	30543017	Nanog_256_peak_2988	669	.	11.1206	72.438	66.9101	145	FALSE
chr14	30586854	30587047	Nanog_256_peak_2990	171	.	10.7978	21.13	17.1426	85	TRUE
chr14	30797678	30797936	Nanog_256_peak_2993	165	.	10.4068	20.4816	16.5255	178	FALSE
chr14	30807285	30807549	Nanog_256_peak_2994	200	.	12.3167	24.1944	20.0666	192	FALSE
chr14	30945293	30945513	Nanog_256_peak_2998	190	.	11.6533	23.0838	19.0057	151	FALSE
chr14	30958109	30958372	Nanog_256_peak_2999	213	.	10.059	25.4995	21.3175	138	FALSE
chr14	30960189	30960412	Nanog_256_peak_3000	235	.	10.6592	27.8199	23.5456	163	FALSE
chr14	32009539	32009862	Nanog_256_peak_3016	307	.	11.0109	35.36	30.7977	132	FALSE
chr14	32062154	32062470	Nanog_256_peak_3019	333	.	12.9458	38.0376	33.3772	119	FALSE
chr14	32066796	32066981	Nanog_256_peak_3020	274	.	11.4699	31.8577	27.423	65	TRUE
chr14	32428316	32428589	Nanog_256_peak_3026	186	.	11.7278	22.6805	18.6186	209	TRUE
chr14	32486184	32486346	Nanog_256_peak_3027	232	.	13.6361	27.5175	23.255	64	FALSE
chr14	32745515	32745960	Nanog_256_peak_3030	719	.	12.4092	77.5179	71.9009	275	FALSE
chr14	32899933	32900283	Nanog_256_peak_3039	258	.	11.6235	30.2422	25.8679	181	FALSE
chr14	32966274	32966745	Nanog_256_peak_3040	362	.	15.3257	41.0471	36.2861	76	TRUE
chr14	33327622	33327909	Nanog_256_peak_3043	189	.	10.6127	23.0166	18.9412	138	TRUE
chr14	33519693	33519832	Nanog_256_peak_3048	258	.	14.8713	30.192	25.8194	59	FALSE
chr14	33904963	33905228	Nanog_256_peak_3052	182	.	11.7822	22.271	18.2284	121	FALSE
chr14	33980845	33981135	Nanog_256_peak_3055	169	.	10.3392	20.8982	16.923	97	TRUE
chr14	34490729	34491020	Nanog_256_peak_3062	315	.	10.0235	36.1406	31.5511	215	FALSE
chr14	34737324	34737444	Nanog_256_peak_3065	180	.	12.3355	22.0791	18.0458	48	TRUE
chr14	34787062	34787198	Nanog_256_peak_3067	199	.	12.5225	24.0269	19.906	52	TRUE
chr14	34933715	34933828	Nanog_256_peak_3069	203	.	13.2431	24.4418	20.3054	71	FALSE
chr14	36048819	36049078	Nanog_256_peak_3079	495	.	18.6487	54.728	49.5892	100	TRUE
chr14	38843553	38843888	Nanog_256_peak_3121	729	.	18.8785	78.5751	72.9373	178	FALSE
chr14	39289733	39290203	Nanog_256_peak_3127	635	.	18.3744	69.0416	63.5874	140	TRUE
chr14	39605877	39605987	Nanog_256_peak_3128	384	.	18.7656	43.2892	38.4605	73	TRUE
chr14	39660016	39660266	Nanog_256_peak_3129	337	.	17.1258	38.417	33.7438	88	FALSE
chr14	40759821	40760074	Nanog_256_peak_3141	134	.	10.22	17.2571	13.4643	66	TRUE
chr14	40840332	40840480	Nanog_256_peak_3142	212	.	13.5616	25.413	21.2346	88	TRUE
chr14	41469034	41469142	Nanog_256_peak_3148	227	.	14.1684	26.9447	22.7036	49	TRUE
chr14	41490220	41490432	Nanog_256_peak_3150	191	.	11.445	23.2848	19.1988	87	FALSE
chr14	42159470	42159873	Nanog_256_peak_3154	261	.	12.8829	30.5597	26.1731	93	TRUE
chr14	42170229	42170461	Nanog_256_peak_3155	278	.	13.5405	32.3466	27.8947	133	TRUE
chr14	43124700	43125035	Nanog_256_peak_3165	209	.	13.1261	25.0719	20.9091	279	FALSE
chr14	43876510	43876999	Nanog_256_peak_3173	220	.	12.8888	26.2584	22.045	309	FALSE
chr14	44471408	44471720	Nanog_256_peak_3176	231	.	13.2303	27.4092	23.1512	192	FALSE
chr14	46028503	46028780	Nanog_256_peak_3192	245	.	11.5807	28.9044	24.5835	149	TRUE
chr15	36345	36545	Nanog_256_peak_3239	175	.	11.0515	21.5513	17.543	102	TRUE
chr15	465618	466206	Nanog_256_peak_3244	154	.	10.6347	19.39	15.4874	551	FALSE
chr15	1373317	1373514	Nanog_256_peak_3257	191	.	12.0838	23.2803	19.1945	38	FALSE
chr15	1586228	1586503	Nanog_256_peak_3258	196	.	11.4128	23.7939	19.6824	178	FALSE
chr15	2372958	2373140	Nanog_256_peak_3264	162	.	11.3439	20.2153	16.2713	112	FALSE
chr15	3029965	3030191	Nanog_256_peak_3271	322	.	16.6069	36.8651	32.2475	74	TRUE
chr15	3132713	3132833	Nanog_256_peak_3272	154	.	11.16	19.3028	15.4047	81	TRUE
chr15	3147154	3147536	Nanog_256_peak_3273	159	.	10.6616	19.8991	15.9713	236	FALSE
chr15	3503306	3504126	Nanog_256_peak_3276	398	.	11.4132	44.6833	39.812	152	FALSE
chr15	4223100	4223736	Nanog_256_peak_3287	290	.	11.9871	33.5017	29.0083	129	FALSE
chr15	4909554	4909786	Nanog_256_peak_3293	223	.	13.4015	26.568	22.343	84	FALSE
chr15	5036248	5037133	Nanog_256_peak_3294	299	.	10.9023	34.4924	29.9614	815	FALSE
chr15	5901534	5901639	Nanog_256_peak_3301	151	.	10.6584	19.0037	15.1201	38	FALSE
chr15	6000064	6000345	Nanog_256_peak_3302	391	.	17.4476	44.0009	39.1497	171	FALSE
chr15	6374777	6374945	Nanog_256_peak_3304	173	.	11.7846	21.3856	17.3853	136	FALSE
chr15	7046862	7046997	Nanog_256_peak_3308	136	.	10.3807	17.4881	13.6837	70	FALSE
chr15	8563728	8563961	Nanog_256_peak_3316	274	.	14.7889	31.8517	27.4175	108	TRUE
chr15	10237988	10238175	Nanog_256_peak_3323	240	.	13.0871	28.3736	24.0757	134	TRUE
chr15	10238360	10238514	Nanog_256_peak_3324	175	.	10.7288	21.5464	17.5384	96	FALSE
chr15	10374210	10374411	Nanog_256_peak_3329	214	.	13.1554	25.6196	21.4324	49	TRUE
chr15	10860688	10860790	Nanog_256_peak_3333	321	.	17.6154	36.7154	32.1037	45	TRUE
chr15	14042450	14042656	Nanog_256_peak_3355	268	.	13.6741	31.261	26.8483	90	FALSE
chr15	15000260	15000568	Nanog_256_peak_3373	270	.	14.5368	31.4279	27.0088	139	TRUE
chr15	15366690	15366913	Nanog_256_peak_3376	600	.	24.8239	65.465	60.0789	64	FALSE
chr15	15479679	15479953	Nanog_256_peak_3379	149	.	10.2682	18.773	14.9008	127	FALSE
chr15	16070173	16070406	Nanog_256_peak_3386	282	.	13.0003	32.732	28.2668	118	TRUE
chr15	16703582	16703746	Nanog_256_peak_3391	225	.	12.471	26.7335	22.502	103	TRUE
chr15	17253481	17254078	Nanog_256_peak_3398	226	.	11.1449	26.8892	22.651	446	FALSE
chr15	18017873	18018107	Nanog_256_peak_3403	140	.	10.2469	17.8996	14.0734	87	FALSE
chr15	18063126	18063563	Nanog_256_peak_3405	172	.	11.1442	21.1951	17.205	371	FALSE
chr15	18719063	18719295	Nanog_256_peak_3411	172	.	10.5202	21.1994	17.2092	68	TRUE
chr15	18885456	18885542	Nanog_256_peak_3413	151	.	10.6584	19.0037	15.1201	45	TRUE
chr15	20492441	20492826	Nanog_256_peak_3436	189	.	11.2623	22.9807	18.9064	69	TRUE
chr15	20778743	20778949	Nanog_256_peak_3440	237	.	13.9598	28.0683	23.7829	83	FALSE
chr15	23793278	23793526	Nanog_256_peak_3473	395	.	19.4555	44.4637	39.5986	179	FALSE
chr15	23915042	23915130	Nanog_256_peak_3476	163	.	11.405	20.3259	16.3761	37	TRUE
chr15	24746743	24746966	Nanog_256_peak_3485	167	.	10.2413	20.7351	16.7676	74	FALSE
chr15	25584363	25584523	Nanog_256_peak_3497	167	.	11.394	20.6951	16.7293	85	FALSE
chr15	25681607	25681875	Nanog_256_peak_3498	273	.	12.1268	31.8119	27.3788	82	FALSE
chr15	26908402	26908612	Nanog_256_peak_3511	323	.	17.4133	36.9564	32.3357	73	TRUE
chr15	26984428	26984606	Nanog_256_peak_3513	231	.	12.9018	27.4544	23.1942	88	TRUE
chr15	26992050	26992289	Nanog_256_peak_3514	162	.	10.242	20.2084	16.2653	103	TRUE
chr15	27374630	27374870	Nanog_256_peak_3520	301	.	11.6049	34.6951	30.1571	179	FALSE
chr15	27439198	27439304	Nanog_256_peak_3521	248	.	12.8475	29.219	24.8854	36	TRUE
chr15	27709229	27709730	Nanog_256_peak_3528	323	.	11.4704	37.0029	32.3803	348	TRUE
chr15	27879426	27879936	Nanog_256_peak_3531	216	.	11.5696	25.8139	21.6179	147	TRUE
chr15	28384252	28384421	Nanog_256_peak_3539	191	.	12.3725	23.2853	19.199	72	TRUE
chr15	29012530	29012732	Nanog_256_peak_3545	262	.	12.905	30.5977	26.2095	116	TRUE
chr15	29661254	29661453	Nanog_256_peak_3555	327	.	16.1157	37.4006	32.7649	94	TRUE
chr15	30486046	30486340	Nanog_256_peak_3560	337	.	13.8707	38.4082	33.7354	110	FALSE
chr15	32468163	32468392	Nanog_256_peak_3578	219	.	13.1517	26.1432	21.9351	67	TRUE
chr15	33345922	33346243	Nanog_256_peak_3587	563	.	17.6068	61.6737	56.369	184	TRUE
chr15	33963747	33963895	Nanog_256_peak_3594	265	.	11.3427	30.9782	26.5768	70	TRUE
chr15	33966590	33966747	Nanog_256_peak_3596	229	.	10.3555	27.2416	22.9907	79	FALSE
chr15	34592992	34593132	Nanog_256_peak_3601	241	.	11.3272	28.4453	24.1445	70	TRUE
chr15	34775978	34776173	Nanog_256_peak_3604	146	.	10.3967	18.553	14.6918	152	FALSE
chr15	35353301	35353593	Nanog_256_peak_3611	199	.	11.2575	24.1074	19.9833	69	TRUE
chr15	35424602	35424940	Nanog_256_peak_3614	224	.	12.0789	26.678	22.4486	172	FALSE
chr15	35617660	35617821	Nanog_256_peak_3615	155	.	11.1003	19.4355	15.5314	81	FALSE
chr15	36598173	36598571	Nanog_256_peak_3627	272	.	14.2773	31.6298	27.2041	162	TRUE
chr15	37274355	37274467	Nanog_256_peak_3634	143	.	10.5944	18.2048	14.3628	56	FALSE
chr15	37559304	37559476	Nanog_256_peak_3637	239	.	13.3633	28.2266	23.9348	87	FALSE
chr15	37929035	37929213	Nanog_256_peak_3639	174	.	11.8471	21.4975	17.492	54	TRUE
chr15	39843154	39843250	Nanog_256_peak_3656	168	.	11.8637	20.7847	16.8141	56	FALSE
chr15	41444611	41444731	Nanog_256_peak_3668	323	.	18.5194	37.0106	32.3873	43	FALSE
chr15	41647747	41647964	Nanog_256_peak_3670	169	.	11.275	20.9329	16.9558	46	FALSE
chr15	41807291	41807470	Nanog_256_peak_3672	173	.	11.2201	21.3223	17.3252	82	FALSE
chr15	41819799	41819899	Nanog_256_peak_3673	140	.	10.2469	17.8996	14.0734	40	FALSE
chr15	42215524	42215746	Nanog_256_peak_3675	247	.	14.2145	29.0681	24.7404	135	TRUE
chr15	43526559	43527141	Nanog_256_peak_3689	371	.	10.1494	41.9328	37.1448	109	FALSE
chr15	43527243	43527486	Nanog_256_peak_3690	518	.	12.4954	57.0243	51.8254	80	FALSE
chr15	43631186	43631476	Nanog_256_peak_3694	282	.	13.7809	32.7592	28.2926	187	FALSE
chr15	44120812	44120945	Nanog_256_peak_3703	200	.	10.2689	24.1414	20.0159	113	FALSE
chr15	44123538	44123759	Nanog_256_peak_3704	374	.	15.6003	42.2697	37.4731	80	TRUE
chr15	44827434	44827541	Nanog_256_peak_3708	215	.	11.509	25.7105	21.5192	36	TRUE
chr15	45548570	45548748	Nanog_256_peak_3712	242	.	14.8125	28.5644	24.259	38	FALSE
chr15	45605115	45605343	Nanog_256_peak_3714	462	.	20.8313	51.2855	46.2433	91	TRUE
chr15	46064273	46064475	Nanog_256_peak_3720	149	.	10.2918	18.8126	14.9384	140	TRUE
chr15	46750532	46750667	Nanog_256_peak_3723	195	.	12.3139	23.6707	19.5655	86	FALSE
chr15	46835919	46836261	Nanog_256_peak_3726	980	.	24.236	104.111	98.0358	171	FALSE
chr15	47435770	47435962	Nanog_256_peak_3732	460	.	19.3063	51.0574	46.0209	51	TRUE
chr15	47485373	47485580	Nanog_256_peak_3734	138	.	10.0917	17.6296	13.8174	89	FALSE
chr15	47864443	47864633	Nanog_256_peak_3737	325	.	17.1878	37.1966	32.5674	94	FALSE
chr16	218456	218682	Nanog_256_peak_3744	206	.	10.972	24.7898	20.6398	186	TRUE
chr16	562125	562321	Nanog_256_peak_3748	281	.	13.3232	32.6347	28.1734	56	TRUE
chr16	1520060	1520176	Nanog_256_peak_3767	155	.	11.2266	19.437	15.5325	45	FALSE
chr16	2272309	2272404	Nanog_256_peak_3772	137	.	10.0663	17.5857	13.7757	20	FALSE
chr16	4654136	4654390	Nanog_256_peak_3789	317	.	15.0987	36.3725	31.7744	131	TRUE
chr16	5412669	5412826	Nanog_256_peak_3796	205	.	10.2675	24.719	20.5721	57	FALSE
chr16	6199258	6199490	Nanog_256_peak_3806	221	.	12.5773	26.317	22.1011	100	FALSE
chr16	6456096	6456370	Nanog_256_peak_3810	187	.	11.7812	22.7701	18.7046	59	FALSE
chr16	6835299	6835664	Nanog_256_peak_3819	204	.	12.2391	24.6085	20.4653	207	FALSE
chr16	7153839	7154181	Nanog_256_peak_3821	636	.	21.4063	69.0773	63.6221	100	FALSE
chr16	7231520	7231795	Nanog_256_peak_3822	265	.	13.4719	30.9187	26.5184	93	FALSE
chr16	8060583	8060812	Nanog_256_peak_3824	141	.	10.4765	17.9839	14.1535	168	FALSE
chr16	10318770	10318905	Nanog_256_peak_3839	135	.	10.1105	17.3136	13.518	75	FALSE
chr16	11004460	11004737	Nanog_256_peak_3846	231	.	13.8963	27.4178	23.1586	137	TRUE
chr16	11029319	11029493	Nanog_256_peak_3847	181	.	10.4401	22.161	18.1235	93	FALSE
chr16	11185704	11185803	Nanog_256_peak_3853	150	.	10.8297	18.9379	15.0567	49	FALSE
chr16	12060765	12060905	Nanog_256_peak_3864	176	.	12.2199	21.6411	17.6288	67	FALSE
chr16	12173677	12173829	Nanog_256_peak_3865	209	.	13.1261	25.0719	20.9091	58	TRUE
chr16	12267491	12267658	Nanog_256_peak_3867	162	.	11.1107	20.2031	16.2606	91	FALSE
chr16	13613962	13614138	Nanog_256_peak_3874	190	.	11.9998	23.1383	19.0577	51	FALSE
chr16	13680654	13680814	Nanog_256_peak_3877	167	.	10.8743	20.7445	16.7766	71	FALSE
chr16	13685670	13685999	Nanog_256_peak_3878	220	.	12.8606	26.2112	22.0001	99	TRUE
chr16	15396870	15397293	Nanog_256_peak_3892	210	.	11.9155	25.2113	21.0413	188	FALSE
chr16	15431229	15431497	Nanog_256_peak_3894	260	.	13.5377	30.386	26.0058	148	TRUE
chr16	15792026	15792186	Nanog_256_peak_3901	194	.	12.7409	23.5079	19.4107	57	FALSE
chr16	15882610	15882910	Nanog_256_peak_3903	190	.	12.5038	23.0779	19.0001	73	FALSE
chr16	16188529	16188909	Nanog_256_peak_3905	382	.	16.9143	43.0862	38.2633	276	TRUE
chr16	16199905	16200045	Nanog_256_peak_3906	163	.	11.3743	20.2704	16.3237	71	TRUE
chr16	16343243	16343450	Nanog_256_peak_3908	223	.	10.9937	26.6192	22.393	168	FALSE
chr16	16739823	16740026	Nanog_256_peak_3913	142	.	10.5351	18.0934	14.2574	154	TRUE
chr16	16761722	16761973	Nanog_256_peak_3914	329	.	17.02	37.565	32.9235	141	FALSE
chr16	16769032	16769179	Nanog_256_peak_3915	143	.	10.5944	18.2048	14.3628	46	FALSE
chr16	19411141	19411541	Nanog_256_peak_3926	274	.	13.6791	31.9233	27.4876	254	TRUE
chr16	19499063	19499335	Nanog_256_peak_3928	225	.	11.094	26.7985	22.564	93	FALSE
chr16	19536466	19536610	Nanog_256_peak_3932	188	.	10.576	22.9541	18.8812	80	FALSE
chr16	19833370	19833496	Nanog_256_peak_3933	177	.	12.2727	21.7254	17.7084	76	FALSE
chr16	19887757	19887872	Nanog_256_peak_3935	136	.	10.1927	17.4623	13.6587	68	TRUE
chr16	20739323	20739561	Nanog_256_peak_3944	300	.	15.2291	34.5435	30.0106	158	FALSE
chr16	20896473	20896598	Nanog_256_peak_3946	219	.	12.1373	26.1741	21.9645	65	FALSE
chr16	21056891	21057209	Nanog_256_peak_3952	555	.	21.6003	60.7889	55.5031	208	TRUE
chr16	21912264	21912381	Nanog_256_peak_3958	246	.	14.5111	29.0166	24.6914	52	FALSE
chr16	22292567	22292860	Nanog_256_peak_3963	169	.	10.9709	20.9055	16.9296	85	FALSE
chr16	22987085	22987235	Nanog_256_peak_3967	146	.	10.6	18.5237	14.6642	82	FALSE
chr16	23958828	23959167	Nanog_256_peak_3975	353	.	14.7626	40.0375	35.3126	192	FALSE
chr16	23987841	23988026	Nanog_256_peak_3977	192	.	10.1595	23.3728	19.2825	122	FALSE
chr16	23991151	23991452	Nanog_256_peak_3978	320	.	14.0701	36.6734	32.0638	117	FALSE
chr16	25145987	25146074	Nanog_256_peak_3991	131	.	10.0454	16.9215	13.1458	43	FALSE
chr16	25259951	25260246	Nanog_256_peak_3994	221	.	13.3067	26.4065	22.1872	140	FALSE
chr16	25921656	25921875	Nanog_256_peak_3998	182	.	12.4443	22.294	18.2503	156	FALSE
chr16	25940797	25940925	Nanog_256_peak_4000	188	.	12.4049	22.9003	18.829	50	FALSE
chr16	27172984	27173250	Nanog_256_peak_4017	246	.	10.9581	28.9967	24.6725	137	TRUE
chr16	27191361	27191610	Nanog_256_peak_4020	273	.	14.3645	31.7762	27.3456	90	FALSE
chr16	27593548	27593729	Nanog_256_peak_4025	172	.	11.9187	21.2764	17.2815	65	FALSE
chr16	27831561	27831773	Nanog_256_peak_4027	258	.	13.0383	30.1813	25.8092	122	TRUE
chr16	29243648	29243981	Nanog_256_peak_4037	178	.	10.2759	21.8831	17.8594	135	TRUE
chr16	29360994	29361362	Nanog_256_peak_4040	291	.	11.409	33.6528	29.1536	200	FALSE
chr16	29450246	29450491	Nanog_256_peak_4042	179	.	12.264	21.9391	17.9125	38	FALSE
chr16	30148364	30148579	Nanog_256_peak_4051	203	.	12.4873	24.482	20.3443	91	FALSE
chr16	30330007	30330199	Nanog_256_peak_4054	1039	.	25.212	110.091	103.92	99	FALSE
chr16	30330486	30330917	Nanog_256_peak_4055	610	.	17.5709	66.4862	61.0807	374	FALSE
chr16	30343847	30344153	Nanog_256_peak_4056	863	.	31.347	92.2767	86.397	86	FALSE
chr16	31846149	31846254	Nanog_256_peak_4069	205	.	12.9293	24.7286	20.581	40	TRUE
chr16	32047425	32047568	Nanog_256_peak_4070	164	.	11.4668	20.4382	16.4837	45	FALSE
chr16	33106589	33106822	Nanog_256_peak_4085	198	.	10.177	23.9772	19.858	125	FALSE
chr16	33598764	33598929	Nanog_256_peak_4091	173	.	10.6235	21.3712	17.3719	62	TRUE
chr16	34040955	34041426	Nanog_256_peak_4094	262	.	12.9494	30.6743	26.2829	208	TRUE
chr16	34046572	34046682	Nanog_256_peak_4095	166	.	11.0628	20.5733	16.6122	47	FALSE
chr16	34528242	34528342	Nanog_256_peak_4101	194	.	11.6337	23.599	19.4974	41	FALSE
chr16	34613468	34613769	Nanog_256_peak_4103	260	.	12.8171	30.4461	26.0635	34	FALSE
chr16	34775023	34775154	Nanog_256_peak_4105	144	.	10.7386	18.309	14.4604	78	FALSE
chr16	35044428	35044685	Nanog_256_peak_4107	162	.	10.8585	20.2291	16.2843	131	TRUE
chr16	35115562	35115817	Nanog_256_peak_4108	184	.	11.3122	22.5158	18.4615	101	FALSE
chr16	35497547	35497995	Nanog_256_peak_4110	227	.	12.2817	27.0202	22.7771	341	FALSE
chr16	35518187	35518519	Nanog_256_peak_4113	527	.	18.6339	57.9642	52.7404	225	TRUE
chr16	35532287	35532548	Nanog_256_peak_4114	156	.	10.4485	19.5434	15.6335	87	FALSE
chr16	35669189	35669413	Nanog_256_peak_4118	207	.	13.6159	24.9039	20.749	50	FALSE
chr16	36065536	36065872	Nanog_256_peak_4121	317	.	12.7856	36.3657	31.7682	178	TRUE
chr16	36223115	36223382	Nanog_256_peak_4127	152	.	11.1222	19.1224	15.2327	172	FALSE
chr16	38946168	38946308	Nanog_256_peak_4142	172	.	11.1947	21.2797	17.2845	78	FALSE
chr16	39211955	39212238	Nanog_256_peak_4145	295	.	14.9271	34.0349	29.5222	119	TRUE
chr16	39422622	39422769	Nanog_256_peak_4149	169	.	11.7208	20.9055	16.9296	34	FALSE
chr16	40043241	40043415	Nanog_256_peak_4156	186	.	12.3075	22.7265	18.6629	118	FALSE
chr16	40090498	40090658	Nanog_256_peak_4157	201	.	10.6872	24.2966	20.1655	81	TRUE
chr16	40091045	40091289	Nanog_256_peak_4158	220	.	11.1431	26.2803	22.0661	186	FALSE
chr16	40197151	40197253	Nanog_256_peak_4159	175	.	12.0889	21.6004	17.5899	65	TRUE
chr16	40377457	40377618	Nanog_256_peak_4161	141	.	10.075	18.0061	14.1744	86	FALSE
chr16	40448306	40448465	Nanog_256_peak_4163	158	.	11.2884	19.7883	15.8665	82	TRUE
chr16	40560470	40560660	Nanog_256_peak_4164	318	.	16.7533	36.4547	31.8531	117	FALSE
chr16	40764809	40764977	Nanog_256_peak_4168	206	.	13.5746	24.8174	20.6664	48	TRUE
chr16	41296307	41296483	Nanog_256_peak_4173	189	.	12.2195	23.0202	18.9443	76	FALSE
chr16	41990085	41990296	Nanog_256_peak_4181	345	.	16.3708	39.2391	34.538	82	TRUE
chr16	42148615	42149080	Nanog_256_peak_4184	208	.	11.0828	24.9807	20.8223	139	TRUE
chr16	42389605	42389801	Nanog_256_peak_4187	232	.	13.2879	27.5056	23.2432	61	FALSE
chr16	43400849	43401028	Nanog_256_peak_4194	280	.	15.184	32.5175	28.0596	101	FALSE
chr16	45236078	45236283	Nanog_256_peak_4201	250	.	14.043	29.367	25.0272	156	TRUE
chr16	46111690	46111951	Nanog_256_peak_4212	220	.	12.8606	26.2112	22.0001	103	FALSE
chr16	48047034	48047253	Nanog_256_peak_4222	162	.	10.242	20.2084	16.2653	125	FALSE
chr16	50132798	50132913	Nanog_256_peak_4235	305	.	17.008	35.0631	30.5122	54	FALSE
chr16	50229147	50229362	Nanog_256_peak_4237	158	.	11.2566	19.7282	15.8097	153	FALSE
chr16	51383418	51383643	Nanog_256_peak_4246	217	.	13.3502	25.9554	21.7545	133	FALSE
chr16	51512998	51513109	Nanog_256_peak_4247	144	.	10.7386	18.309	14.4604	53	FALSE
chr16	51631622	51631965	Nanog_256_peak_4248	225	.	11.4505	26.8187	22.5829	119	FALSE
chr17	111762	112020	Nanog_256_peak_4269	289	.	13.7588	33.3901	28.9012	101	FALSE
chr17	1642384	1642582	Nanog_256_peak_4283	272	.	15.712	31.6607	27.2342	106	FALSE
chr17	2400581	2400936	Nanog_256_peak_4289	169	.	11.8928	20.9677	16.9887	206	FALSE
chr17	3990064	3990267	Nanog_256_peak_4305	251	.	14.8034	29.5257	25.179	139	TRUE
chr17	4317471	4317590	Nanog_256_peak_4310	199	.	12.8222	24.0744	19.9513	66	FALSE
chr17	5633135	5633315	Nanog_256_peak_4326	144	.	10.6243	18.2612	14.4163	144	FALSE
chr17	6508119	6508255	Nanog_256_peak_4335	262	.	15.7147	30.6843	26.2927	66	FALSE
chr17	8014385	8014648	Nanog_256_peak_4344	241	.	13.4768	28.4166	24.1165	175	TRUE
chr17	8317900	8318417	Nanog_256_peak_4347	587	.	17.2054	64.0701	58.7117	153	FALSE
chr17	9895833	9896102	Nanog_256_peak_4361	182	.	12.0861	22.3347	18.2892	194	TRUE
chr17	10315719	10315899	Nanog_256_peak_4367	259	.	13.4859	30.2988	25.9224	93	FALSE
chr17	11738033	11738515	Nanog_256_peak_4382	245	.	12.6403	28.8669	24.5475	78	FALSE
chr17	12124935	12125140	Nanog_256_peak_4385	300	.	16.4274	34.6359	30.1	118	TRUE
chr17	13557039	13557148	Nanog_256_peak_4394	191	.	12.6043	23.2595	19.1744	27	FALSE
chr17	14280163	14280439	Nanog_256_peak_4398	170	.	10.7084	20.9816	17.0018	236	FALSE
chr17	16369426	16369655	Nanog_256_peak_4422	181	.	11.7263	22.176	18.1377	141	TRUE
chr17	16993942	16994126	Nanog_256_peak_4427	152	.	10.9483	19.1547	15.2633	107	TRUE
chr17	18031689	18031844	Nanog_256_peak_4432	271	.	15.6717	31.5894	27.1649	73	FALSE
chr17	18623309	18623631	Nanog_256_peak_4440	271	.	13.106	31.5969	27.1722	140	TRUE
chr17	19347696	19348099	Nanog_256_peak_4449	512	.	10.7886	56.3912	51.2094	293	FALSE
chr17	19480981	19481088	Nanog_256_peak_4454	218	.	13.6814	26.057	21.8523	67	FALSE
chr17	20499073	20499227	Nanog_256_peak_4460	657	.	23.0582	71.2146	65.7138	66	TRUE
chr17	20888331	20888718	Nanog_256_peak_4466	207	.	13.027	24.8986	20.7438	319	FALSE
chr17	21078556	21078896	Nanog_256_peak_4470	185	.	11.3597	22.5948	18.5371	214	FALSE
chr17	21199039	21199225	Nanog_256_peak_4472	141	.	10.4765	17.9839	14.1535	75	FALSE
chr17	21277339	21277664	Nanog_256_peak_4474	420	.	14.571	46.9591	42.0305	155	FALSE
chr17	21290060	21290319	Nanog_256_peak_4477	673	.	20.2297	72.8957	67.3606	116	TRUE
chr17	21318340	21318569	Nanog_256_peak_4478	145	.	10.7151	18.4334	14.578	90	FALSE
chr17	21487647	21488052	Nanog_256_peak_4480	218	.	12.3987	26.0188	21.8157	235	TRUE
chr17	21675546	21675895	Nanog_256_peak_4486	381	.	15.1693	42.9602	38.1411	128	FALSE
chr17	21734456	21734624	Nanog_256_peak_4488	280	.	14.7859	32.484	28.0273	71	TRUE
chr17	22066604	22066758	Nanog_256_peak_4499	173	.	11.7846	21.3856	17.3853	75	TRUE
chr17	22518508	22518948	Nanog_256_peak_4503	412	.	15.6751	46.1302	41.2218	169	FALSE
chr17	22535504	22535701	Nanog_256_peak_4504	152	.	10.7395	19.1446	15.254	119	FALSE
chr17	23310478	23310694	Nanog_256_peak_4508	306	.	14.0368	35.2319	30.6745	135	TRUE
chr17	23926725	23926882	Nanog_256_peak_4518	174	.	11.8471	21.4975	17.492	41	FALSE
chr17	24566960	24567097	Nanog_256_peak_4525	236	.	14.2112	27.9654	23.6836	46	TRUE
chr17	25197027	25197146	Nanog_256_peak_4531	151	.	10.8887	19.0454	15.1593	49	FALSE
chr17	25856547	25856759	Nanog_256_peak_4535	158	.	10.8675	19.7858	15.8641	71	FALSE
chr17	26271174	26271282	Nanog_256_peak_4540	146	.	10.8153	18.4596	14.6033	42	FALSE
chr17	26416087	26416318	Nanog_256_peak_4542	159	.	11.3525	19.9099	15.9817	67	TRUE
chr17	27185271	27185666	Nanog_256_peak_4547	155	.	10.6856	19.4762	15.5695	248	TRUE
chr17	27285845	27286371	Nanog_256_peak_4551	204	.	10.5224	24.5916	20.4494	199	FALSE
chr17	27723212	27723417	Nanog_256_peak_4558	172	.	11.1694	21.2373	17.2444	130	FALSE
chr17	28341401	28341531	Nanog_256_peak_4564	161	.	11.2834	20.1063	16.1679	59	FALSE
chr17	28862511	28862696	Nanog_256_peak_4569	299	.	15.1984	34.4917	29.9608	120	FALSE
chr17	30360627	30360898	Nanog_256_peak_4598	331	.	14.719	37.8207	33.1692	133	TRUE
chr17	30984157	30984418	Nanog_256_peak_4610	147	.	10.448	18.6409	14.775	50	FALSE
chr17	31138511	31138695	Nanog_256_peak_4613	375	.	18.2008	42.3325	37.5348	62	FALSE
chr17	31226061	31226318	Nanog_256_peak_4615	230	.	11.7167	27.2815	23.0291	129	TRUE
chr17	31656297	31656433	Nanog_256_peak_4617	224	.	11.3767	26.6898	22.46	85	FALSE
chr17	32046293	32046506	Nanog_256_peak_4620	142	.	10.5057	18.0384	14.2052	90	TRUE
chr17	33837203	33837317	Nanog_256_peak_4641	187	.	12.5809	22.848	18.7792	60	FALSE
chr17	34030254	34030527	Nanog_256_peak_4645	277	.	15.3436	32.1711	27.7246	29	FALSE
chr17	35174646	35174921	Nanog_256_peak_4654	361	.	15.2289	40.8745	36.1209	186	TRUE
chr17	36396018	36396260	Nanog_256_peak_4663	485	.	18.5133	53.6749	48.5612	76	FALSE
chr17	36589464	36589696	Nanog_256_peak_4666	474	.	20.6476	52.5523	47.477	136	FALSE
chr17	37156249	37156534	Nanog_256_peak_4671	382	.	17.7965	43.1052	38.2818	114	FALSE
chr17	37762454	37762689	Nanog_256_peak_4676	259	.	14.944	30.3175	25.9405	106	TRUE
chr17	38235033	38235262	Nanog_256_peak_4678	190	.	11.3301	23.0936	19.0151	121	FALSE
chr17	38272169	38272477	Nanog_256_peak_4686	332	.	12.2044	37.9003	33.2462	161	FALSE
chr17	38830578	38830697	Nanog_256_peak_4691	132	.	10.1029	17.0314	13.2503	30	TRUE
chr17	39586167	39586429	Nanog_256_peak_4694	147	.	10.6565	18.6249	14.76	168	FALSE
chr17	40512471	40512641	Nanog_256_peak_4701	195	.	11.0141	23.6971	19.5904	88	TRUE
chr17	41303401	41303671	Nanog_256_peak_4708	198	.	11.5473	24.0184	19.8977	125	TRUE
chr17	41560706	41561030	Nanog_256_peak_4712	296	.	14.1985	34.1467	29.6283	192	TRUE
chr17	42572476	42572822	Nanog_256_peak_4727	226	.	12.5698	26.8989	22.6596	172	FALSE
chr17	42909867	42910027	Nanog_256_peak_4729	245	.	15.3408	28.8626	24.5435	78	FALSE
chr17	43031807	43031931	Nanog_256_peak_4731	151	.	10.8887	19.0454	15.1593	62	TRUE
chr17	43453614	43454102	Nanog_256_peak_4736	366	.	14.3689	41.4696	36.6977	194	TRUE
chr17	43473319	43473560	Nanog_256_peak_4738	244	.	13.2986	28.7279	24.4149	84	TRUE
chr17	43896970	43897110	Nanog_256_peak_4741	201	.	13.1689	24.3017	20.1704	44	FALSE
chr17	44234446	44234686	Nanog_256_peak_4747	316	.	15.4018	36.1947	31.6037	133	FALSE
chr17	46213760	46214005	Nanog_256_peak_4766	160	.	11.1939	19.9458	16.0158	65	TRUE
chr17	46494067	46494154	Nanog_256_peak_4771	439	.	23.1436	48.9309	43.9563	36	FALSE
chr17	47247289	47247487	Nanog_256_peak_4775	210	.	13.4508	25.2086	21.0389	166	FALSE
chr17	47697930	47698413	Nanog_256_peak_4783	263	.	12.9717	30.7127	26.3195	330	TRUE
chr17	47713570	47714037	Nanog_256_peak_4784	396	.	17.3372	44.5643	39.6959	319	TRUE
chr17	47734917	47735064	Nanog_256_peak_4785	162	.	11.5718	20.1517	16.2116	55	TRUE
chr17	47980265	47980600	Nanog_256_peak_4790	381	.	15.9789	42.9434	38.1244	131	TRUE
chr17	48942714	48943029	Nanog_256_peak_4794	463	.	20.4228	51.3773	46.3329	108	FALSE
chr17	49078599	49078842	Nanog_256_peak_4797	187	.	12.1294	22.865	18.7949	180	FALSE
chr17	49204081	49204470	Nanog_256_peak_4798	218	.	12.7491	26.0244	21.8208	271	TRUE
chr17	49645908	49646106	Nanog_256_peak_4802	357	.	18.3399	40.4851	35.7447	144	FALSE
chr17	50048159	50048259	Nanog_256_peak_4807	299	.	15.5725	34.4576	29.9277	57	TRUE
chr17	51419380	51419728	Nanog_256_peak_4820	292	.	13.9508	33.7212	29.22	166	TRUE
chr17	52142137	52142342	Nanog_256_peak_4829	177	.	12.2727	21.7254	17.7084	112	FALSE
chr17	52818411	52818592	Nanog_256_peak_4836	199	.	10.9073	24.0937	19.9701	141	TRUE
chr18	1644548	1644879	Nanog_256_peak_4857	183	.	10.5525	22.3509	18.3047	215	TRUE
chr18	2549124	2549288	Nanog_256_peak_4870	156	.	11.294	19.5739	15.6629	88	TRUE
chr18	2678477	2678749	Nanog_256_peak_4871	345	.	16.3708	39.2391	34.538	178	FALSE
chr18	4320589	4320749	Nanog_256_peak_4886	148	.	10.8386	18.6703	14.8033	121	FALSE
chr18	5068349	5068598	Nanog_256_peak_4889	322	.	17.7069	36.8787	32.2606	92	TRUE
chr18	5782450	5782606	Nanog_256_peak_4896	214	.	11.843	25.6795	21.4892	127	FALSE
chr18	6706001	6706120	Nanog_256_peak_4903	421	.	21.9748	47.0348	42.1046	52	FALSE
chr18	7031394	7031583	Nanog_256_peak_4904	280	.	16.4611	32.5337	28.0755	108	FALSE
chr18	7114151	7114297	Nanog_256_peak_4905	160	.	11.4173	20.0337	16.099	54	FALSE
chr18	7119856	7120074	Nanog_256_peak_4906	222	.	13.3381	26.46	22.2384	70	TRUE
chr18	7273701	7273828	Nanog_256_peak_4908	855	.	28.595	91.3871	85.5243	54	FALSE
chr18	8250006	8250150	Nanog_256_peak_4911	151	.	11.0292	19.0425	15.1569	71	TRUE
chr18	8320046	8320183	Nanog_256_peak_4912	292	.	16.2524	33.7343	29.2327	65	FALSE
chr18	9452183	9452371	Nanog_256_peak_4923	219	.	14.1775	26.1236	21.9163	136	FALSE
chr18	11294547	11295023	Nanog_256_peak_4939	243	.	13.2451	28.6382	24.3295	285	TRUE
chr18	11324510	11324666	Nanog_256_peak_4940	159	.	11.1644	19.893	15.9657	79	FALSE
chr18	13558476	13558733	Nanog_256_peak_4958	145	.	10.3206	18.423	14.5689	150	TRUE
chr18	13766460	13766758	Nanog_256_peak_4960	298	.	13.5212	34.3253	29.8011	120	TRUE
chr18	14432258	14432562	Nanog_256_peak_4969	322	.	14.9805	36.8677	32.2499	230	FALSE
chr18	14887168	14887304	Nanog_256_peak_4976	170	.	11.571	21.0062	17.0254	63	FALSE
chr18	18041957	18042331	Nanog_256_peak_5003	365	.	15.4733	41.3096	36.5403	185	TRUE
chr18	18104860	18105047	Nanog_256_peak_5005	236	.	13.5229	27.9002	23.6227	117	TRUE
chr18	18667392	18667552	Nanog_256_peak_5014	160	.	10.9743	19.9685	16.0372	66	FALSE
chr18	19874791	19874948	Nanog_256_peak_5021	184	.	11.9245	22.5135	18.4594	44	TRUE
chr18	20157978	20158333	Nanog_256_peak_5025	236	.	13.1693	27.902	23.6243	186	FALSE
chr18	20173538	20173869	Nanog_256_peak_5026	193	.	11.5622	23.48	19.3841	114	FALSE
chr18	20224786	20225232	Nanog_256_peak_5027	478	.	14.5883	52.9154	47.8276	195	FALSE
chr18	20458361	20458523	Nanog_256_peak_5033	171	.	11.6616	21.1665	17.1772	127	TRUE
chr18	20507245	20507477	Nanog_256_peak_5035	143	.	10.1963	18.2115	14.369	40	FALSE
chr18	20674780	20675064	Nanog_256_peak_5036	252	.	13.8002	29.5682	25.2202	219	FALSE
chr18	22274220	22274462	Nanog_256_peak_5052	404	.	19.96	45.3284	40.439	55	TRUE
chr18	23846164	23846340	Nanog_256_peak_5068	221	.	12.2544	26.3706	22.152	97	FALSE
chr18	24422443	24422657	Nanog_256_peak_5076	176	.	11.1467	21.7097	17.6941	145	TRUE
chr18	25794075	25794246	Nanog_256_peak_5091	327	.	17.675	37.4139	32.7773	113	FALSE
chr18	26139533	26139788	Nanog_256_peak_5093	144	.	10.015	18.3504	14.4995	126	FALSE
chr18	26505467	26505605	Nanog_256_peak_5100	183	.	12.5179	22.4409	18.3905	55	FALSE
chr18	26523480	26523721	Nanog_256_peak_5101	389	.	17.7351	43.7427	38.9003	103	FALSE
chr18	27888437	27888584	Nanog_256_peak_5107	240	.	14.903	28.3369	24.04	81	TRUE
chr18	29272641	29272879	Nanog_256_peak_5115	245	.	14.0836	28.846	24.528	140	FALSE
chr18	30517808	30518019	Nanog_256_peak_5122	133	.	10.0297	17.1683	13.3795	187	TRUE
chr18	31507636	31507878	Nanog_256_peak_5130	385	.	20.3303	43.3765	38.5455	61	FALSE
chr18	32532590	32532810	Nanog_256_peak_5136	176	.	11.7246	21.704	17.6887	154	FALSE
chr18	32538126	32538237	Nanog_256_peak_5137	178	.	12.0386	21.8432	17.821	63	TRUE
chr18	32581576	32581745	Nanog_256_peak_5138	267	.	16.1382	31.132	26.725	96	FALSE
chr18	33090879	33091135	Nanog_256_peak_5147	158	.	10.8411	19.7408	15.8212	106	TRUE
chr18	33901528	33901800	Nanog_256_peak_5152	404	.	18.2604	45.3863	40.4956	113	TRUE
chr18	34097477	34097694	Nanog_256_peak_5156	263	.	10.9098	30.7586	26.3634	146	TRUE
chr18	34116612	34116810	Nanog_256_peak_5157	186	.	12.0702	22.7631	18.6979	95	FALSE
chr18	35264464	35264596	Nanog_256_peak_5171	174	.	12.1457	21.4858	17.4809	85	FALSE
chr18	36874925	36875204	Nanog_256_peak_5192	135	.	10.3157	17.345	13.5478	119	TRUE
chr18	37988509	37988736	Nanog_256_peak_5203	234	.	12.3072	27.6767	23.4077	105	TRUE
chr18	38511640	38511761	Nanog_256_peak_5208	139	.	10.3326	17.7179	13.9017	53	TRUE
chr18	39090704	39091118	Nanog_256_peak_5218	263	.	13.7487	30.7414	26.347	354	FALSE
chr18	39326856	39326995	Nanog_256_peak_5219	198	.	12.2055	24.0075	19.8873	56	TRUE
chr18	40416551	40416723	Nanog_256_peak_5227	177	.	11.9741	21.7263	17.709	105	FALSE
chr18	40617495	40617623	Nanog_256_peak_5228	241	.	13.8601	28.468	24.1664	60	FALSE
chr18	41133661	41133863	Nanog_256_peak_5232	132	.	10.1029	17.0314	13.2503	55	FALSE
chr18	41562325	41562476	Nanog_256_peak_5235	259	.	14.944	30.3175	25.9405	61	FALSE
chr18	42987560	42987825	Nanog_256_peak_5243	193	.	11.8838	23.4684	19.3735	100	TRUE
chr18	43044214	43044430	Nanog_256_peak_5244	176	.	10.793	21.6531	17.6403	99	FALSE
chr18	43069771	43069894	Nanog_256_peak_5245	142	.	10.3799	18.133	14.2942	61	FALSE
chr18	43452112	43452213	Nanog_256_peak_5250	324	.	17.1071	37.0585	32.4334	39	FALSE
chr18	44013800	44013987	Nanog_256_peak_5257	186	.	12.5105	22.7151	18.652	136	TRUE
chr18	44849934	44850130	Nanog_256_peak_5266	167	.	11.4231	20.7461	16.7778	133	FALSE
chr18	45703497	45703701	Nanog_256_peak_5271	225	.	12.5202	26.8159	22.5802	125	FALSE
chr18	46151368	46151469	Nanog_256_peak_5274	143	.	10.4069	18.1806	14.3399	49	FALSE
chr18	46355665	46355947	Nanog_256_peak_5278	531	.	13.2508	58.4046	53.1693	146	TRUE
chr18	46356165	46356362	Nanog_256_peak_5279	370	.	10.5625	41.8261	37.0411	80	TRUE
chr18	46829194	46829306	Nanog_256_peak_5283	181	.	11.4425	22.2028	18.1639	60	TRUE
chr18	49321302	49321647	Nanog_256_peak_5309	639	.	22.5714	69.4496	63.989	171	FALSE
chr18	49333650	49334031	Nanog_256_peak_5310	446	.	18.0556	49.6728	44.674	153	FALSE
chr19	841555	841658	Nanog_256_peak_5341	240	.	13.7975	28.3625	24.0651	44	FALSE
chr19	1113196	1113477	Nanog_256_peak_5345	334	.	16.976	38.1636	33.4988	85	TRUE
chr19	2219996	2220161	Nanog_256_peak_5357	211	.	13.2947	25.3684	21.1918	119	FALSE
chr19	2318456	2318560	Nanog_256_peak_5358	132	.	10.1029	17.0314	13.2503	43	FALSE
chr19	3104240	3104469	Nanog_256_peak_5361	248	.	12.8241	29.1794	24.8481	139	FALSE
chr19	3164567	3164890	Nanog_256_peak_5362	187	.	12.1294	22.865	18.7949	65	FALSE
chr19	4415811	4416055	Nanog_256_peak_5367	229	.	14.0434	27.1703	22.9215	96	TRUE
chr19	4858831	4858982	Nanog_256_peak_5374	198	.	12.4622	23.9237	19.8065	63	TRUE
chr19	5252906	5253139	Nanog_256_peak_5377	345	.	15.5379	39.2477	34.546	88	FALSE
chr19	5315902	5316067	Nanog_256_peak_5378	177	.	11.7539	21.7548	17.7363	124	FALSE
chr19	6042948	6043329	Nanog_256_peak_5384	457	.	18.7114	50.822	45.7927	191	TRUE
chr19	6134830	6134966	Nanog_256_peak_5385	158	.	10.6135	19.8187	15.8953	46	FALSE
chr19	6303965	6304110	Nanog_256_peak_5390	302	.	14.9776	34.7935	30.253	58	TRUE
chr19	6383774	6383911	Nanog_256_peak_5391	135	.	10.2796	17.3732	13.5737	54	FALSE
chr19	7149785	7149965	Nanog_256_peak_5402	450	.	17.8522	50.0998	45.0915	106	FALSE
chr19	8481289	8481547	Nanog_256_peak_5415	527	.	20.4971	58.0192	52.7934	153	TRUE
chr19	8634670	8634976	Nanog_256_peak_5417	318	.	15.1543	36.4673	31.8651	194	FALSE
chr19	9015268	9015435	Nanog_256_peak_5425	238	.	14.573	28.1243	23.8368	77	TRUE
chr19	9429942	9430169	Nanog_256_peak_5430	187	.	11.7812	22.7701	18.7046	163	TRUE
chr19	9741192	9741549	Nanog_256_peak_5435	475	.	17.9209	52.6018	47.5247	141	FALSE
chr19	9908269	9908424	Nanog_256_peak_5437	155	.	10.9337	19.4844	15.5773	71	TRUE
chr19	10196321	10196514	Nanog_256_peak_5439	151	.	10.4117	19.0138	15.1296	101	TRUE
chr19	10214833	10215026	Nanog_256_peak_5440	144	.	10.2457	18.2954	14.4485	68	FALSE
chr19	13994745	13994889	Nanog_256_peak_5476	215	.	12.911	25.7362	21.5437	47	TRUE
chr19	14053383	14053476	Nanog_256_peak_5478	147	.	10.6282	18.5741	14.7122	29	FALSE
chr19	14191614	14191772	Nanog_256_peak_5480	203	.	10.4739	24.5058	20.3673	97	FALSE
chr19	14192273	14192522	Nanog_256_peak_5481	588	.	20.6623	64.2382	58.8758	131	TRUE
chr19	14901234	14901439	Nanog_256_peak_5483	224	.	13.1189	26.6446	22.4171	132	FALSE
chr19	14907772	14907947	Nanog_256_peak_5484	215	.	11.5291	25.7449	21.5519	70	FALSE
chr19	15454292	15454571	Nanog_256_peak_5496	339	.	14.3586	38.5947	33.9156	90	FALSE
chr19	15694785	15695144	Nanog_256_peak_5504	168	.	10.3195	20.8653	16.8911	286	FALSE
chr19	16692881	16693114	Nanog_256_peak_5512	144	.	10.7386	18.309	14.4604	117	FALSE
chr19	18325823	18325997	Nanog_256_peak_5522	230	.	14.5611	27.3337	23.0787	56	TRUE
chr19	18533508	18533753	Nanog_256_peak_5525	376	.	14.8857	42.4358	37.6331	211	FALSE
chr19	19620076	19620245	Nanog_256_peak_5534	141	.	10.2997	17.992	14.1611	121	FALSE
chr19	19727972	19728141	Nanog_256_peak_5539	406	.	16.1534	45.5038	40.6111	61	TRUE
chr19	19878701	19878982	Nanog_256_peak_5553	148	.	10.2212	18.6944	14.8257	39	TRUE
chr19	20300154	20300303	Nanog_256_peak_5559	158	.	10.2641	19.7316	15.8129	100	FALSE
chr19	21365986	21366139	Nanog_256_peak_5562	331	.	15.9161	37.7612	33.1116	81	TRUE
chr19	21651518	21651666	Nanog_256_peak_5564	206	.	12.9942	24.8416	20.6895	67	FALSE
chr19	21667219	21667445	Nanog_256_peak_5565	164	.	11.2506	20.4452	16.4902	157	FALSE
chr19	21678541	21678868	Nanog_256_peak_5566	273	.	12.4497	31.7488	27.3191	108	TRUE
chr19	21684405	21684704	Nanog_256_peak_5568	288	.	13.3373	33.327	28.8408	132	FALSE
chr19	23700378	23700552	Nanog_256_peak_5585	260	.	15.9113	30.3875	26.0071	44	FALSE
chr19	24126214	24126357	Nanog_256_peak_5589	213	.	12.1042	25.5268	21.3436	57	TRUE
chr19	24553380	24553652	Nanog_256_peak_5591	203	.	12.7698	24.4522	20.3153	188	FALSE
chr19	25773047	25773223	Nanog_256_peak_5598	174	.	11.6089	21.5042	17.4982	77	FALSE
chr19	26828412	26828750	Nanog_256_peak_5612	250	.	13.6855	29.376	25.0355	138	FALSE
chr19	26850908	26851080	Nanog_256_peak_5613	157	.	10.8149	19.696	15.7791	104	FALSE
chr19	27254066	27254243	Nanog_256_peak_5619	173	.	11.7536	21.3302	17.3329	93	TRUE
chr19	27390895	27391186	Nanog_256_peak_5623	396	.	12.743	44.4995	39.6335	157	TRUE
chr19	28147674	28147874	Nanog_256_peak_5631	145	.	10.0601	18.4255	14.5707	29	FALSE
chr19	28255748	28255894	Nanog_256_peak_5637	240	.	14.4292	28.3482	24.051	39	FALSE
chr19	28854021	28854160	Nanog_256_peak_5641	163	.	11.1942	20.3475	16.3967	68	TRUE
chr19	29768460	29768874	Nanog_256_peak_5653	528	.	19.1214	58.0448	52.8168	237	FALSE
chr19	29795819	29796324	Nanog_256_peak_5655	726	.	18.7451	78.2687	72.6359	125	TRUE
chr19	30562635	30562777	Nanog_256_peak_5666	214	.	13.6742	25.6223	21.4349	60	FALSE
chr19	30847957	30848150	Nanog_256_peak_5668	157	.	10.7888	19.6516	15.7371	54	TRUE
chr19	30884692	30884853	Nanog_256_peak_5671	133	.	10.132	17.087	13.303	52	TRUE
chr19	31344571	31344817	Nanog_256_peak_5675	831	.	24.6998	88.9821	83.1652	104	FALSE
chr19	32233314	32233494	Nanog_256_peak_5687	231	.	14.4051	27.3856	23.128	91	TRUE
chr19	32764786	32764942	Nanog_256_peak_5692	181	.	11.7263	22.176	18.1377	98	FALSE
chr19	33199214	33199517	Nanog_256_peak_5695	152	.	10.5097	19.1787	15.2859	130	FALSE
chr19	33374174	33374365	Nanog_256_peak_5699	456	.	21.8292	50.7082	45.6821	96	TRUE
chr19	33484939	33485190	Nanog_256_peak_5702	484	.	20.7851	53.5877	48.4779	102	TRUE
chr19	33843700	33843996	Nanog_256_peak_5705	239	.	14.3558	28.2189	23.9273	240	FALSE
chr19	34169317	34169511	Nanog_256_peak_5708	194	.	11.9362	23.5561	19.4568	101	FALSE
chr19	34446820	34446981	Nanog_256_peak_5709	133	.	10.003	17.1206	13.3347	57	FALSE
chr19	34579787	34580224	Nanog_256_peak_5710	162	.	10.5491	20.2039	16.2612	341	FALSE
chr19	34868830	34868998	Nanog_256_peak_5711	160	.	11.0013	20.0148	16.0811	96	TRUE
chr19	34991608	34991885	Nanog_256_peak_5712	963	.	16.4529	102.448	96.3974	131	FALSE
chr19	35758116	35758282	Nanog_256_peak_5722	147	.	10.8074	18.6103	14.7467	63	TRUE
chr19	36016006	36016425	Nanog_256_peak_5724	355	.	13.3767	40.2671	35.5338	170	FALSE
chr19	38513131	38513353	Nanog_256_peak_5742	190	.	12.5371	23.138	19.0576	80	TRUE
chr19	38665569	38665803	Nanog_256_peak_5744	232	.	13.9651	27.5369	23.2731	71	TRUE
chr19	38833380	38833523	Nanog_256_peak_5745	136	.	10.3398	17.4915	13.6867	54	FALSE
chr19	38847534	38847683	Nanog_256_peak_5746	149	.	10.5521	18.82	14.9454	59	TRUE
chr19	39579697	39579963	Nanog_256_peak_5752	172	.	10.843	21.2051	17.2143	162	FALSE
chr19	40924029	40924147	Nanog_256_peak_5761	319	.	17.8372	36.5637	31.9575	58	FALSE
chr19	41642465	41642627	Nanog_256_peak_5769	175	.	11.0279	21.5121	17.5055	57	FALSE
chr19	42044092	42044257	Nanog_256_peak_5772	187	.	12.3722	22.842	18.7736	104	TRUE
chr19	42241311	42241584	Nanog_256_peak_5777	211	.	12.3216	25.3101	21.136	169	TRUE
chr19	42321832	42322214	Nanog_256_peak_5778	421	.	17.8934	47.0513	42.1206	132	FALSE
chr19	42328184	42328448	Nanog_256_peak_5779	341	.	15.7306	38.8629	34.1744	138	FALSE
chr19	43604140	43604233	Nanog_256_peak_5795	133	.	10.0297	17.1683	13.3795	44	TRUE
chr19	43776829	43777052	Nanog_256_peak_5800	356	.	14.2001	40.4362	35.6986	133	FALSE
chr19	45719980	45720092	Nanog_256_peak_5809	160	.	10.4156	19.9826	16.0506	60	TRUE
chr2	25739	25936	Nanog_256_peak_5830	149	.	10.9014	18.7921	14.9186	55	TRUE
chr2	219691	219801	Nanog_256_peak_5834	229	.	12.7209	27.1517	22.9034	72	FALSE
chr2	914594	914712	Nanog_256_peak_5851	164	.	10.0324	20.3864	16.4339	50	FALSE
chr2	1173927	1174463	Nanog_256_peak_5855	360	.	11.7114	40.8101	36.0591	220	TRUE
chr2	2164143	2164359	Nanog_256_peak_5867	270	.	14.9263	31.4627	27.043	101	FALSE
chr2	2967985	2968162	Nanog_256_peak_5875	143	.	10.1963	18.2115	14.369	106	FALSE
chr2	3169955	3170192	Nanog_256_peak_5877	204	.	10.5224	24.5916	20.4494	98	FALSE
chr2	3913258	3913763	Nanog_256_peak_5885	958	.	21.3184	101.942	95.8958	443	FALSE
chr2	4205308	4205621	Nanog_256_peak_5887	1060	.	24.8685	112.213	106.008	156	FALSE
chr2	5079515	5080252	Nanog_256_peak_5892	217	.	10.6252	25.9555	21.7546	159	FALSE
chr2	5136031	5136169	Nanog_256_peak_5896	158	.	10.307	19.8026	15.88	78	FALSE
chr2	5295136	5295411	Nanog_256_peak_5900	230	.	12.4677	27.3336	23.0787	106	FALSE
chr2	6242907	6243093	Nanog_256_peak_5908	168	.	11.4818	20.8491	16.8754	57	FALSE
chr2	6458354	6458450	Nanog_256_peak_5910	130	.	10.0634	16.8057	13.0366	42	FALSE
chr2	7188272	7188441	Nanog_256_peak_5916	211	.	13.2947	25.3684	21.1918	72	TRUE
chr2	7557484	7557709	Nanog_256_peak_5918	142	.	10.5057	18.0384	14.2052	66	FALSE
chr2	7702892	7703113	Nanog_256_peak_5919	176	.	12.2199	21.6411	17.6288	100	FALSE
chr2	8016142	8016400	Nanog_256_peak_5924	208	.	12.5104	25.0625	20.8999	92	FALSE
chr2	8444398	8444643	Nanog_256_peak_5927	176	.	11.1467	21.7097	17.6941	69	FALSE
chr2	9818202	9818625	Nanog_256_peak_5935	217	.	11.3074	25.9644	21.7633	231	FALSE
chr2	9970922	9971126	Nanog_256_peak_5937	158	.	10.8411	19.7408	15.8212	143	TRUE
chr2	11535132	11535300	Nanog_256_peak_5948	256	.	15.5804	30.0212	25.6564	74	FALSE
chr2	13214968	13215076	Nanog_256_peak_5959	148	.	10.9157	18.6728	14.8055	58	TRUE
chr2	13938610	13938788	Nanog_256_peak_5962	175	.	12.0545	21.5344	17.5269	127	FALSE
chr2	14005835	14005943	Nanog_256_peak_5963	429	.	18.8443	47.9106	42.9601	58	FALSE
chr2	14052242	14052483	Nanog_256_peak_5964	134	.	10.2514	17.2054	13.4154	44	FALSE
chr2	14395835	14396044	Nanog_256_peak_5966	180	.	10.3665	22.0365	18.005	84	TRUE
chr2	14515801	14516065	Nanog_256_peak_5967	263	.	15.5061	30.7726	26.377	80	FALSE
chr2	14676130	14676263	Nanog_256_peak_5969	1204	.	46.0582	126.753	120.409	60	FALSE
chr2	14712106	14712235	Nanog_256_peak_5971	193	.	13.0183	23.4729	19.3777	72	FALSE
chr2	14730092	14730230	Nanog_256_peak_5973	339	.	19.2785	38.6491	33.9687	56	FALSE
chr2	15447012	15447192	Nanog_256_peak_5979	146	.	10.3712	18.5094	14.6504	135	TRUE
chr2	16564238	16564644	Nanog_256_peak_5981	536	.	17.4282	58.8852	53.6406	170	FALSE
chr2	16800167	16800545	Nanog_256_peak_5989	284	.	12.3751	32.923	28.4506	60	FALSE
chr2	17114821	17115007	Nanog_256_peak_5993	191	.	12.7971	23.2607	19.1754	116	FALSE
chr2	19015758	19015897	Nanog_256_peak_6003	265	.	15.3184	30.968	26.5668	76	TRUE
chr2	19436721	19436871	Nanog_256_peak_6006	160	.	11.5056	20.0032	16.0699	60	FALSE
chr2	20249061	20249268	Nanog_256_peak_6018	154	.	11.0696	19.3785	15.4771	39	FALSE
chr2	20726018	20726201	Nanog_256_peak_6020	175	.	11.8786	21.5541	17.5456	108	TRUE
chr2	21489478	21489926	Nanog_256_peak_6028	262	.	13.6688	30.6069	26.2178	127	TRUE
chr2	21605481	21605639	Nanog_256_peak_6030	203	.	12.8013	24.5068	20.3681	70	TRUE
chr2	21615018	21615302	Nanog_256_peak_6031	164	.	10.3859	20.447	16.4918	159	FALSE
chr2	22589387	22589636	Nanog_256_peak_6041	1331	.	31.3517	139.549	133.125	52	FALSE
chr2	22640239	22640405	Nanog_256_peak_6043	245	.	14.4398	28.8931	24.573	101	FALSE
chr2	22816791	22816970	Nanog_256_peak_6044	288	.	16.6533	33.3622	28.8739	73	TRUE
chr2	22965469	22965760	Nanog_256_peak_6045	276	.	13.0195	32.1041	27.6601	210	TRUE
chr2	23379064	23379202	Nanog_256_peak_6050	169	.	11.275	20.9329	16.9558	44	TRUE
chr2	23829569	23829822	Nanog_256_peak_6053	545	.	24.9244	59.8599	54.5938	78	FALSE
chr2	25120032	25120205	Nanog_256_peak_6063	193	.	12.1691	23.4247	19.332	102	FALSE
chr2	25174532	25174701	Nanog_256_peak_6065	271	.	14.9942	31.5777	27.154	31	FALSE
chr2	25248785	25249145	Nanog_256_peak_6068	211	.	11.9622	25.2892	21.1162	219	TRUE
chr2	25636114	25636342	Nanog_256_peak_6072	205	.	11.5991	24.6813	20.5357	87	FALSE
chr2	26476020	26476237	Nanog_256_peak_6081	314	.	16.5255	36.0675	31.4808	94	FALSE
chr2	27035042	27035256	Nanog_256_peak_6086	208	.	12.5104	25.0625	20.8999	144	TRUE
chr2	27145187	27145284	Nanog_256_peak_6088	200	.	13.0956	24.164	20.0377	38	TRUE
chr2	27331005	27331536	Nanog_256_peak_6091	252	.	11.6364	29.6338	25.2837	416	FALSE
chr2	27937109	27937219	Nanog_256_peak_6095	186	.	12.2754	22.6694	18.6084	77	TRUE
chr2	28601649	28601775	Nanog_256_peak_6101	522	.	25.8907	57.4574	52.2466	62	FALSE
chr2	29515922	29516098	Nanog_256_peak_6108	180	.	11.0578	22.093	18.0584	70	FALSE
chr2	29709288	29709707	Nanog_256_peak_6113	426	.	11.266	47.5529	42.6104	310	FALSE
chr2	30453119	30453292	Nanog_256_peak_6125	168	.	11.6562	20.7858	16.815	127	TRUE
chr2	31718973	31719061	Nanog_256_peak_6136	138	.	10.4008	17.6122	13.8007	37	TRUE
chr2	32126484	32126816	Nanog_256_peak_6140	132	.	10.1566	17.0021	13.2225	153	FALSE
chr2	32522687	32523008	Nanog_256_peak_6144	499	.	19.3035	55.0873	49.9374	165	TRUE
chr2	33040163	33040435	Nanog_256_peak_6153	261	.	11.1252	30.5584	26.1719	106	FALSE
chr2	33066205	33066377	Nanog_256_peak_6154	445	.	20.7129	49.545	44.552	98	TRUE
chr2	33383049	33383277	Nanog_256_peak_6162	304	.	14.6942	34.9938	30.4454	115	FALSE
chr2	33717517	33717692	Nanog_256_peak_6164	275	.	16.1892	32.023	27.5824	99	FALSE
chr2	34757903	34758114	Nanog_256_peak_6172	205	.	12.2924	24.6976	20.5511	114	FALSE
chr2	35758813	35758998	Nanog_256_peak_6180	168	.	11.4818	20.8491	16.8754	62	TRUE
chr2	36938547	36938986	Nanog_256_peak_6195	499	.	15.9509	55.0797	49.9301	260	FALSE
chr2	38117558	38117824	Nanog_256_peak_6209	305	.	15.5436	35.0728	30.5215	78	TRUE
chr2	38293482	38293735	Nanog_256_peak_6213	391	.	18.7467	43.9789	39.1285	129	TRUE
chr2	38340744	38341107	Nanog_256_peak_6214	230	.	10.3824	27.2931	23.0405	161	TRUE
chr2	38345450	38345777	Nanog_256_peak_6215	292	.	11.4497	33.7352	29.2336	214	TRUE
chr2	38892486	38893026	Nanog_256_peak_6226	238	.	12.2242	28.1561	23.8675	218	TRUE
chr2	39334729	39334978	Nanog_256_peak_6231	132	.	10.1029	17.0314	13.2503	170	FALSE
chr2	40482811	40483036	Nanog_256_peak_6237	152	.	10.4605	19.0958	15.2075	98	TRUE
chr2	41127947	41128205	Nanog_256_peak_6242	192	.	12.1121	23.3282	19.2397	156	FALSE
chr2	41687157	41687395	Nanog_256_peak_6250	136	.	10.3398	17.4915	13.6867	157	TRUE
chr2	41878443	41878662	Nanog_256_peak_6254	328	.	16.1483	37.4555	32.8176	129	FALSE
chr2	43023900	43024133	Nanog_256_peak_6258	213	.	12.765	25.4901	21.3084	75	FALSE
chr2	44224213	44224498	Nanog_256_peak_6266	175	.	11.0751	21.5906	17.581	211	FALSE
chr2	44436457	44436619	Nanog_256_peak_6270	189	.	11.3074	23.0558	18.9786	71	FALSE
chr2	44779443	44779728	Nanog_256_peak_6276	534	.	19.0174	58.6787	53.4395	55	TRUE
chr2	45239822	45240060	Nanog_256_peak_6277	168	.	11.6562	20.7858	16.815	174	FALSE
chr2	47958772	47958936	Nanog_256_peak_6297	311	.	14.7207	35.7262	31.1514	52	FALSE
chr2	47976721	47977020	Nanog_256_peak_6301	397	.	16.4927	44.6018	39.7326	130	FALSE
chr2	48074027	48074183	Nanog_256_peak_6303	333	.	18.0365	38.0511	33.3903	85	FALSE
chr2	48303009	48303255	Nanog_256_peak_6305	268	.	10.5681	31.2977	26.8837	108	FALSE
chr2	48448807	48448905	Nanog_256_peak_6307	179	.	12.264	21.9391	17.9125	43	FALSE
chr2	50966830	50967082	Nanog_256_peak_6321	193	.	12.4348	23.3937	19.302	32	FALSE
chr2	52390369	52390593	Nanog_256_peak_6329	148	.	10.4738	18.6853	14.8171	157	FALSE
chr2	53078388	53078539	Nanog_256_peak_6334	142	.	10.3799	18.133	14.2942	102	FALSE
chr2	53500399	53500664	Nanog_256_peak_6336	359	.	12.5827	40.7176	35.97	101	TRUE
chr2	53500823	53501121	Nanog_256_peak_6337	300	.	11.247	34.5963	30.0617	46	FALSE
chr2	55298045	55298305	Nanog_256_peak_6344	191	.	12.6043	23.2595	19.1744	42	FALSE
chr2	55655619	55655876	Nanog_256_peak_6346	376	.	14.5141	42.4659	37.6624	174	TRUE
chr2	57902603	57902933	Nanog_256_peak_6363	224	.	12.0789	26.678	22.4486	201	FALSE
chr2	58015620	58015884	Nanog_256_peak_6365	227	.	11.8992	26.9819	22.74	134	FALSE
chr2	59278350	59278636	Nanog_256_peak_6374	171	.	11.3841	21.1189	17.132	178	FALSE
chr20	1272317	1272441	Nanog_256_peak_6387	167	.	11.7876	20.7569	16.7877	83	FALSE
chr20	1627378	1627645	Nanog_256_peak_6389	241	.	13.8287	28.4151	24.1158	67	FALSE
chr20	2964213	2964498	Nanog_256_peak_6412	232	.	12.1971	27.4898	23.228	95	FALSE
chr20	3587217	3587314	Nanog_256_peak_6415	149	.	10.9014	18.7921	14.9186	47	TRUE
chr20	4302230	4302350	Nanog_256_peak_6422	130	.	10.0169	16.8673	13.0948	36	FALSE
chr20	4522048	4522158	Nanog_256_peak_6424	256	.	15.7179	29.9791	25.6158	81	FALSE
chr20	4793451	4793718	Nanog_256_peak_6429	530	.	21.1429	58.3097	53.0769	98	TRUE
chr20	5834516	5834751	Nanog_256_peak_6433	156	.	11.1936	19.6097	15.6967	111	TRUE
chr20	6630206	6630405	Nanog_256_peak_6435	229	.	13.7945	27.2418	22.9907	109	FALSE
chr20	6818662	6818846	Nanog_256_peak_6437	341	.	17.7422	38.7971	34.1101	62	TRUE
chr20	7176856	7176968	Nanog_256_peak_6447	207	.	13.6159	24.9039	20.749	53	FALSE
chr20	8474775	8475057	Nanog_256_peak_6460	313	.	14.8267	35.9078	31.3258	128	TRUE
chr20	8884814	8885283	Nanog_256_peak_6464	159	.	10.0432	19.8785	15.9519	68	TRUE
chr20	8946705	8946849	Nanog_256_peak_6465	184	.	12.555	22.5154	18.4612	91	FALSE
chr20	9373969	9374074	Nanog_256_peak_6466	219	.	14.1775	26.1236	21.9163	65	FALSE
chr20	10116350	10116632	Nanog_256_peak_6471	569	.	13.3372	62.2208	56.9045	146	FALSE
chr20	10118271	10118511	Nanog_256_peak_6472	425	.	11.0257	47.5305	42.5892	77	FALSE
chr20	10434868	10435004	Nanog_256_peak_6475	144	.	10.4614	18.2769	14.4311	61	FALSE
chr20	12452189	12452370	Nanog_256_peak_6487	178	.	12.0386	21.8432	17.821	37	FALSE
chr20	14336373	14336880	Nanog_256_peak_6494	188	.	10.239	22.9427	18.8701	386	TRUE
chr20	14631835	14632022	Nanog_256_peak_6497	135	.	10.2796	17.3732	13.5737	89	FALSE
chr20	15252991	15253093	Nanog_256_peak_6504	281	.	16.8749	32.5628	28.1035	40	FALSE
chr20	16455771	16455911	Nanog_256_peak_6511	255	.	15.289	29.8937	25.5349	74	FALSE
chr20	17730534	17730755	Nanog_256_peak_6518	381	.	16.394	42.9299	38.1114	138	TRUE
chr20	17742415	17742704	Nanog_256_peak_6520	437	.	15.0951	48.7589	43.7863	171	TRUE
chr20	20486125	20486291	Nanog_256_peak_6545	183	.	11.8387	22.3672	18.3202	83	TRUE
chr20	20530011	20530239	Nanog_256_peak_6547	294	.	11.9055	33.9958	29.4845	82	FALSE
chr20	21391321	21391550	Nanog_256_peak_6555	223	.	12.7079	26.5353	22.3114	148	TRUE
chr20	21666032	21666171	Nanog_256_peak_6557	197	.	12.6904	23.8415	19.7279	68	FALSE
chr20	23226452	23226727	Nanog_256_peak_6572	198	.	11.5473	24.0184	19.8977	149	FALSE
chr20	23254315	23254491	Nanog_256_peak_6573	358	.	16.7285	40.5642	35.8213	107	FALSE
chr20	23620372	23620578	Nanog_256_peak_6575	215	.	12.911	25.7362	21.5437	112	FALSE
chr20	24034459	24034614	Nanog_256_peak_6585	398	.	14.1717	44.6946	39.8232	67	TRUE
chr20	24389216	24389464	Nanog_256_peak_6598	486	.	21.3725	53.7837	48.6674	129	TRUE
chr20	25234417	25234672	Nanog_256_peak_6608	159	.	10.9474	19.9224	15.9933	196	TRUE
chr20	26844376	26844629	Nanog_256_peak_6637	352	.	15.5678	40.0208	35.2963	138	FALSE
chr20	26947669	26947846	Nanog_256_peak_6638	227	.	13.327	26.9949	22.7523	58	FALSE
chr20	26987332	26987451	Nanog_256_peak_6639	150	.	10.6317	18.9574	15.0755	49	FALSE
chr20	27085996	27086302	Nanog_256_peak_6642	565	.	19.3987	61.8885	56.5813	166	FALSE
chr20	27458176	27458440	Nanog_256_peak_6645	198	.	11.8287	23.9238	19.8065	139	TRUE
chr20	28584067	28584260	Nanog_256_peak_6660	137	.	10.0663	17.5857	13.7757	70	FALSE
chr20	29218334	29218537	Nanog_256_peak_6666	194	.	11.9626	23.6002	19.4984	83	TRUE
chr20	29255008	29255257	Nanog_256_peak_6668	514	.	18.824	56.6771	51.4866	150	TRUE
chr20	29505861	29505970	Nanog_256_peak_6671	272	.	15.4058	31.685	27.2577	74	TRUE
chr20	29565649	29565921	Nanog_256_peak_6673	397	.	18.2648	44.6415	39.7712	188	FALSE
chr20	30041193	30041645	Nanog_256_peak_6676	320	.	14.0701	36.6734	32.0638	219	FALSE
chr20	30062691	30063201	Nanog_256_peak_6677	165	.	10.4278	20.5164	16.5583	99	FALSE
chr20	30510575	30510862	Nanog_256_peak_6682	218	.	13.3832	26.0126	21.8096	128	TRUE
chr20	30857682	30857957	Nanog_256_peak_6684	688	.	22.3606	74.4046	68.8445	165	TRUE
chr20	31715242	31715374	Nanog_256_peak_6696	145	.	10.3206	18.423	14.5689	56	FALSE
chr20	31727948	31728237	Nanog_256_peak_6697	153	.	10.266	19.2402	15.3446	165	FALSE
chr20	32231561	32231930	Nanog_256_peak_6702	535	.	19.1016	58.8348	53.5917	198	TRUE
chr20	32892807	32893043	Nanog_256_peak_6707	274	.	14.4232	31.8748	27.4398	137	TRUE
chr20	33330590	33330937	Nanog_256_peak_6711	211	.	12.0091	25.3678	21.1916	186	TRUE
chr20	33377932	33378298	Nanog_256_peak_6715	154	.	10.0347	19.352	15.4518	230	FALSE
chr20	34325669	34325808	Nanog_256_peak_6724	406	.	16.2029	45.5935	40.6988	80	FALSE
chr20	35012054	35012312	Nanog_256_peak_6739	175	.	10.4299	21.5913	17.5814	197	TRUE
chr20	35075352	35075635	Nanog_256_peak_6744	363	.	10.0732	41.1111	36.3484	167	FALSE
chr20	35576245	35576495	Nanog_256_peak_6753	212	.	12.3996	25.4402	21.261	110	FALSE
chr20	36039798	36040017	Nanog_256_peak_6758	149	.	10.0254	18.8412	14.9654	103	FALSE
chr20	36392655	36392930	Nanog_256_peak_6763	192	.	12.4036	23.3393	19.2502	93	FALSE
chr20	36682820	36683080	Nanog_256_peak_6765	258	.	14.2173	30.2679	25.8928	166	FALSE
chr20	36920492	36920768	Nanog_256_peak_6770	728	.	18.1055	78.448	72.812	142	TRUE
chr20	37148371	37148539	Nanog_256_peak_6771	187	.	12.1294	22.865	18.7949	103	FALSE
chr20	37866087	37866208	Nanog_256_peak_6781	134	.	10.0834	17.2648	13.4718	59	FALSE
chr20	38963168	38963288	Nanog_256_peak_6791	152	.	10.4605	19.0958	15.2075	84	TRUE
chr20	39219595	39219809	Nanog_256_peak_6798	178	.	10.6263	21.92	17.8941	93	TRUE
chr20	40199283	40199614	Nanog_256_peak_6801	163	.	11.1942	20.3475	16.3967	144	FALSE
chr20	40638424	40638566	Nanog_256_peak_6806	132	.	10.1029	17.0314	13.2503	74	TRUE
chr20	41285108	41285504	Nanog_256_peak_6812	347	.	16.4984	39.4552	34.7467	79	TRUE
chr20	41293417	41293607	Nanog_256_peak_6813	292	.	15.5347	33.7441	29.2421	106	TRUE
chr20	41299745	41300021	Nanog_256_peak_6814	149	.	10.0254	18.8412	14.9654	173	FALSE
chr20	41903157	41903275	Nanog_256_peak_6816	145	.	10.7823	18.3901	14.5371	44	TRUE
chr20	42192022	42192228	Nanog_256_peak_6819	167	.	11.7876	20.7569	16.7877	55	FALSE
chr20	43663037	43663495	Nanog_256_peak_6827	490	.	19.7297	54.2052	49.0802	176	FALSE
chr20	43727350	43727602	Nanog_256_peak_6829	167	.	10.8504	20.7047	16.7381	158	TRUE
chr20	43929823	43930165	Nanog_256_peak_6831	264	.	13.0618	30.8676	26.4688	240	TRUE
chr20	45328181	45328393	Nanog_256_peak_6837	235	.	14.779	27.7742	23.502	55	FALSE
chr20	45397121	45397416	Nanog_256_peak_6839	199	.	12.8222	24.0744	19.9513	75	FALSE
chr20	45890720	45891146	Nanog_256_peak_6844	266	.	10.7381	31.0325	26.6289	99	TRUE
chr20	46171319	46171762	Nanog_256_peak_6846	318	.	11.514	36.4488	31.8475	335	TRUE
chr20	46409381	46409671	Nanog_256_peak_6853	348	.	13.3494	39.5161	34.8058	43	FALSE
chr20	46830632	46830810	Nanog_256_peak_6860	216	.	13.2846	25.8422	21.6452	123	FALSE
chr20	47532751	47533008	Nanog_256_peak_6865	179	.	11.3173	21.994	17.9644	95	FALSE
chr20	47549460	47549596	Nanog_256_peak_6866	248	.	15.1442	29.1846	24.853	73	FALSE
chr20	47702234	47702384	Nanog_256_peak_6867	248	.	10.7285	29.1697	24.8385	74	TRUE
chr20	47705899	47706035	Nanog_256_peak_6868	396	.	14.8337	44.5352	39.6676	64	FALSE
chr20	47727627	47727868	Nanog_256_peak_6871	339	.	14.3805	38.6343	33.9543	182	TRUE
chr20	47828899	47829066	Nanog_256_peak_6872	177	.	11.7834	21.8058	17.7852	106	FALSE
chr20	47881901	47882050	Nanog_256_peak_6873	279	.	16.7374	32.3877	27.9341	78	TRUE
chr20	48325282	48325439	Nanog_256_peak_6880	217	.	13.8662	25.9828	21.781	65	TRUE
chr20	48688950	48689273	Nanog_256_peak_6884	373	.	15.5024	42.0945	37.3018	150	TRUE
chr20	48781951	48782316	Nanog_256_peak_6885	380	.	14.3639	42.9023	38.0848	254	TRUE
chr20	51386549	51386679	Nanog_256_peak_6897	138	.	10.4466	17.6348	13.8223	65	FALSE
chr20	52271296	52271481	Nanog_256_peak_6906	189	.	12.6881	23.0516	18.9747	48	FALSE
chr20	52774206	52774341	Nanog_256_peak_6910	255	.	15.289	29.8937	25.5349	57	TRUE
chr21	2026886	2027130	Nanog_256_peak_6949	180	.	11.9328	22.066	18.0333	149	FALSE
chr21	2078411	2078971	Nanog_256_peak_6951	343	.	15.032	39.0825	34.3861	442	FALSE
chr21	2177435	2177705	Nanog_256_peak_6953	596	.	22.0543	65.0202	59.6453	139	FALSE
chr21	2208895	2209111	Nanog_256_peak_6955	220	.	11.8188	26.2375	22.0252	185	FALSE
chr21	2247412	2247692	Nanog_256_peak_6959	677	.	23.7415	73.3388	67.7948	148	FALSE
chr21	2261716	2262036	Nanog_256_peak_6960	516	.	20.7574	56.8102	51.6148	139	FALSE
chr21	2274683	2274851	Nanog_256_peak_6961	398	.	19.636	44.7724	39.8979	96	TRUE
chr21	3299708	3299835	Nanog_256_peak_6968	155	.	11.1312	19.4931	15.5855	82	FALSE
chr21	3703489	3703663	Nanog_256_peak_6971	194	.	12.2556	23.5715	19.4712	30	TRUE
chr21	6533526	6533890	Nanog_256_peak_6990	350	.	17.5288	39.7853	35.0667	145	FALSE
chr21	7187390	7187686	Nanog_256_peak_6992	333	.	15.2349	38.0105	33.3514	140	FALSE
chr21	7228654	7229003	Nanog_256_peak_6993	204	.	11.8737	24.563	20.4219	75	TRUE
chr21	7468556	7468737	Nanog_256_peak_6996	456	.	12.4388	50.6646	45.6403	89	TRUE
chr21	7976590	7976878	Nanog_256_peak_7002	311	.	15.5477	35.7555	31.1798	150	FALSE
chr21	10762883	10763220	Nanog_256_peak_7027	418	.	19.075	46.7682	41.8435	191	TRUE
chr21	11636686	11637118	Nanog_256_peak_7039	410	.	15.6087	46.0057	41.0994	168	TRUE
chr21	13011227	13011418	Nanog_256_peak_7048	332	.	15.616	37.9559	33.299	54	FALSE
chr21	13149409	13149528	Nanog_256_peak_7051	407	.	15.4128	45.6372	40.7413	79	TRUE
chr21	13150039	13150213	Nanog_256_peak_7052	233	.	10.8825	27.6303	23.3631	48	FALSE
chr21	13692851	13693193	Nanog_256_peak_7055	392	.	12.5759	44.1238	39.2674	194	TRUE
chr21	13699774	13700067	Nanog_256_peak_7056	1106	.	25.2455	116.938	110.673	77	TRUE
chr21	14093373	14093525	Nanog_256_peak_7061	218	.	13.0907	26.0398	21.8356	105	FALSE
chr21	14741162	14741330	Nanog_256_peak_7068	185	.	12.2116	22.5563	18.5001	60	FALSE
chr21	15437995	15438169	Nanog_256_peak_7074	493	.	14.3072	54.5023	49.368	110	FALSE
chr21	15439478	15439760	Nanog_256_peak_7075	1051	.	23.6755	111.351	105.154	65	FALSE
chr21	15757463	15757685	Nanog_256_peak_7079	222	.	12.3258	26.4902	22.2681	144	TRUE
chr21	15927124	15927427	Nanog_256_peak_7083	1013	.	14.4787	107.507	101.38	165	TRUE
chr21	16511950	16512117	Nanog_256_peak_7094	252	.	14.2001	29.6315	25.2815	113	TRUE
chr21	17398203	17398440	Nanog_256_peak_7103	210	.	13.2268	25.2486	21.0767	101	TRUE
chr21	17515621	17515781	Nanog_256_peak_7110	141	.	10.0511	17.9657	14.1363	14	FALSE
chr21	18008620	18008815	Nanog_256_peak_7112	172	.	10.843	21.2051	17.2143	118	FALSE
chr21	18261909	18262091	Nanog_256_peak_7121	185	.	11.042	22.6137	18.5547	138	FALSE
chr21	18619190	18619419	Nanog_256_peak_7128	159	.	10.0238	19.8462	15.9216	43	FALSE
chr21	19062443	19062568	Nanog_256_peak_7130	297	.	16.5798	34.3061	29.7828	72	FALSE
chr21	19387519	19387735	Nanog_256_peak_7136	224	.	14.015	26.6622	22.434	44	FALSE
chr21	19919879	19920073	Nanog_256_peak_7144	209	.	12.8431	25.0852	20.9215	64	FALSE
chr21	20169450	20169697	Nanog_256_peak_7147	191	.	12.3416	23.2316	19.1481	152	FALSE
chr21	20557992	20558238	Nanog_256_peak_7150	237	.	12.182	28.0837	23.7981	182	TRUE
chr21	21416412	21416761	Nanog_256_peak_7161	140	.	10.2207	17.8539	14.0304	220	FALSE
chr21	21519903	21520259	Nanog_256_peak_7162	162	.	10.5717	20.2414	16.2961	282	FALSE
chr21	21850236	21850400	Nanog_256_peak_7164	269	.	15.2212	31.3673	26.9511	70	TRUE
chr21	22878685	22878821	Nanog_256_peak_7172	180	.	11.3921	22.1187	18.083	51	FALSE
chr21	23168976	23169219	Nanog_256_peak_7174	205	.	12.2924	24.6976	20.5511	150	FALSE
chr21	23637859	23638228	Nanog_256_peak_7177	206	.	11.3155	24.7884	20.6386	263	TRUE
chr21	24879803	24880039	Nanog_256_peak_7189	209	.	12.5382	25.1091	20.9443	83	FALSE
chr21	25618236	25618465	Nanog_256_peak_7196	163	.	10.2828	20.2759	16.3288	109	TRUE
chr21	25865398	25865570	Nanog_256_peak_7197	267	.	15.4344	31.1712	26.7627	63	FALSE
chr21	26383030	26383259	Nanog_256_peak_7208	142	.	10.353	18.0857	14.2506	69	TRUE
chr21	27404644	27404968	Nanog_256_peak_7222	157	.	10.8149	19.696	15.7791	184	TRUE
chr21	27611139	27611381	Nanog_256_peak_7223	154	.	10.6347	19.39	15.4874	163	FALSE
chr21	27633658	27633817	Nanog_256_peak_7225	189	.	11.6283	23.042	18.9657	86	FALSE
chr21	27641447	27641788	Nanog_256_peak_7226	209	.	12.8736	25.1373	20.9711	152	FALSE
chr21	28222591	28222763	Nanog_256_peak_7229	160	.	10.9743	19.9685	16.0372	54	FALSE
chr21	28875808	28875956	Nanog_256_peak_7234	160	.	11.5056	20.0032	16.0699	73	FALSE
chr21	29029256	29029549	Nanog_256_peak_7236	311	.	14.7207	35.7262	31.1514	114	TRUE
chr21	31011872	31012390	Nanog_256_peak_7251	262	.	11.168	30.6414	26.2513	112	TRUE
chr21	31158802	31158989	Nanog_256_peak_7254	358	.	17.6195	40.6382	35.8939	65	TRUE
chr21	32079891	32080058	Nanog_256_peak_7259	1073	.	31.9793	113.594	107.366	96	TRUE
chr21	32704756	32704849	Nanog_256_peak_7265	144	.	10.6544	18.3181	14.4683	50	FALSE
chr21	32894711	32894841	Nanog_256_peak_7269	130	.	10.0169	16.8673	13.0948	92	TRUE
chr21	33381202	33381564	Nanog_256_peak_7270	319	.	14.004	36.5555	31.9498	79	TRUE
chr21	33849259	33849503	Nanog_256_peak_7275	290	.	14.6368	33.5455	29.0501	116	TRUE
chr21	34119683	34119820	Nanog_256_peak_7277	191	.	12.6043	23.2595	19.1744	85	FALSE
chr21	37184355	37184625	Nanog_256_peak_7301	357	.	14.9921	40.4506	35.7123	162	TRUE
chr21	37461629	37461950	Nanog_256_peak_7312	276	.	15.958	32.0988	27.6549	186	TRUE
chr21	38686145	38686279	Nanog_256_peak_7323	184	.	12.3719	22.4559	18.4047	49	TRUE
chr21	39323256	39323462	Nanog_256_peak_7329	270	.	14.5678	31.48	27.0594	77	TRUE
chr21	40417478	40417705	Nanog_256_peak_7343	146	.	10.1285	18.5395	14.6793	78	FALSE
chr21	40822443	40822797	Nanog_256_peak_7348	347	.	14.4312	39.4367	34.7289	207	TRUE
chr21	42209240	42209486	Nanog_256_peak_7360	443	.	15.7578	49.3149	44.3286	177	FALSE
chr21	42685348	42685473	Nanog_256_peak_7365	329	.	10.87	37.5692	32.9269	61	FALSE
chr21	42830766	42830878	Nanog_256_peak_7367	132	.	10.1029	17.0314	13.2503	50	FALSE
chr21	43141181	43141585	Nanog_256_peak_7373	217	.	10.9698	25.9748	21.7735	178	FALSE
chr21	44264593	44264827	Nanog_256_peak_7387	181	.	11.1032	22.1684	18.1307	84	TRUE
chr21	45814583	45814701	Nanog_256_peak_7408	140	.	10.2469	17.8996	14.0734	69	FALSE
chr22	817446	817556	Nanog_256_peak_7417	139	.	10.1429	17.7184	13.9019	69	FALSE
chr22	1248718	1249071	Nanog_256_peak_7421	619	.	23.3858	67.3573	61.9381	149	FALSE
chr22	1300410	1300534	Nanog_256_peak_7425	158	.	11.41	19.7773	15.8567	66	FALSE
chr22	2206432	2206609	Nanog_256_peak_7433	156	.	10.9905	19.5844	15.6725	130	TRUE
chr22	3153766	3153931	Nanog_256_peak_7440	145	.	10.5441	18.4239	14.5693	91	TRUE
chr22	3299084	3299181	Nanog_256_peak_7444	135	.	10.1378	17.3628	13.5643	63	FALSE
chr22	4795824	4796101	Nanog_256_peak_7458	308	.	10.2146	35.3976	30.8338	80	FALSE
chr22	4796653	4797000	Nanog_256_peak_7459	516	.	14.0706	56.8854	51.6884	148	FALSE
chr22	5171451	5171554	Nanog_256_peak_7461	144	.	10.7168	18.2535	14.4088	49	FALSE
chr22	5710496	5710683	Nanog_256_peak_7465	221	.	13.2754	26.3533	22.1357	144	FALSE
chr22	6164109	6164237	Nanog_256_peak_7467	394	.	20.8369	44.3193	39.4582	72	FALSE
chr22	6470018	6470167	Nanog_256_peak_7468	175	.	11.9102	21.611	17.6	38	FALSE
chr22	7257470	7257567	Nanog_256_peak_7475	135	.	10.1378	17.3628	13.5643	56	FALSE
chr22	8795756	8796061	Nanog_256_peak_7480	985	.	25.3607	104.623	98.5361	150	TRUE
chr22	8987157	8987337	Nanog_256_peak_7483	135	.	10.2796	17.3732	13.5737	51	FALSE
chr22	10539197	10539367	Nanog_256_peak_7499	240	.	13.4198	28.3212	24.0248	62	FALSE
chr22	10571538	10571729	Nanog_256_peak_7500	195	.	11.6819	23.6792	19.5735	145	TRUE
chr22	10650556	10650751	Nanog_256_peak_7501	351	.	17.5673	39.8505	35.1306	87	FALSE
chr22	11145975	11146250	Nanog_256_peak_7508	347	.	12.0073	39.4834	34.7738	174	TRUE
chr22	11438591	11438784	Nanog_256_peak_7515	234	.	13.7316	27.6796	23.4105	62	FALSE
chr22	12693840	12693990	Nanog_256_peak_7533	417	.	19.0364	46.7028	41.7793	99	FALSE
chr22	13788812	13789096	Nanog_256_peak_7544	223	.	12.3498	26.5304	22.3067	68	FALSE
chr22	15387694	15388164	Nanog_256_peak_7564	293	.	14.0242	33.8475	29.3413	334	FALSE
chr22	17127903	17128304	Nanog_256_peak_7583	316	.	15.0435	36.2783	31.685	171	TRUE
chr22	18548775	18549095	Nanog_256_peak_7596	428	.	14.259	47.7821	42.8348	141	FALSE
chr22	18748248	18748525	Nanog_256_peak_7601	238	.	10.8325	28.1466	23.8584	178	FALSE
chr22	19224998	19225132	Nanog_256_peak_7606	140	.	10.4184	17.8762	14.0513	76	FALSE
chr22	20463449	20463631	Nanog_256_peak_7624	488	.	12.3862	53.9625	48.8426	41	TRUE
chr22	20588027	20588486	Nanog_256_peak_7629	219	.	11.7765	26.1658	21.9564	256	TRUE
chr22	20837514	20837899	Nanog_256_peak_7631	338	.	14.3149	38.5157	33.84	127	FALSE
chr22	22301048	22301192	Nanog_256_peak_7646	599	.	23.2099	65.3011	59.9206	87	TRUE
chr22	23249434	23249582	Nanog_256_peak_7654	175	.	11.0515	21.5513	17.543	63	FALSE
chr22	24642218	24642566	Nanog_256_peak_7662	191	.	10.0972	23.2627	19.1773	225	TRUE
chr22	26853173	26853371	Nanog_256_peak_7669	179	.	11.9026	22.0133	17.9829	152	FALSE
chr22	34687783	34688085	Nanog_256_peak_7706	183	.	11.2651	22.4375	18.3874	129	FALSE
chr22	35275736	35275856	Nanog_256_peak_7715	174	.	11.9862	21.4043	17.4036	32	FALSE
chr22	36839719	36839901	Nanog_256_peak_7737	147	.	10.1747	18.6166	14.752	104	FALSE
chr22	37339658	37340025	Nanog_256_peak_7741	478	.	15.2827	52.9137	47.8259	113	TRUE
chr22	38803984	38804088	Nanog_256_peak_7769	249	.	11.7739	29.2517	24.9165	63	FALSE
chr23	1320248	1320740	Nanog_256_peak_7784	236	.	13.1693	27.902	23.6243	342	FALSE
chr23	1329580	1329796	Nanog_256_peak_7785	158	.	11.0767	19.7371	15.818	88	FALSE
chr23	1486372	1486715	Nanog_256_peak_7790	216	.	12.6395	25.841	21.6444	276	FALSE
chr23	2471809	2471951	Nanog_256_peak_7802	290	.	16.133	33.5269	29.0323	66	TRUE
chr23	3484797	3485125	Nanog_256_peak_7815	271	.	14.9942	31.5777	27.154	134	TRUE
chr23	3759478	3759679	Nanog_256_peak_7818	348	.	15.308	39.567	34.8548	70	TRUE
chr23	3761238	3761385	Nanog_256_peak_7819	285	.	13.1666	33.0263	28.5504	87	FALSE
chr23	5822798	5822915	Nanog_256_peak_7833	190	.	12.2802	23.1252	19.0454	48	TRUE
chr23	5978045	5978437	Nanog_256_peak_7834	154	.	10.0551	19.3858	15.4837	204	TRUE
chr23	6768958	6769145	Nanog_256_peak_7838	265	.	13.4719	30.9187	26.5184	80	TRUE
chr23	7366525	7366685	Nanog_256_peak_7840	169	.	11.275	20.9329	16.9558	82	TRUE
chr23	7820542	7820655	Nanog_256_peak_7846	170	.	11.0445	21.0284	17.0458	50	FALSE
chr23	8027664	8027993	Nanog_256_peak_7850	269	.	14.1343	31.3896	26.9722	178	TRUE
chr23	10210189	10210315	Nanog_256_peak_7868	213	.	13.398	25.551	21.3664	72	TRUE
chr23	11377985	11378364	Nanog_256_peak_7874	268	.	12.9314	31.2936	26.8797	288	TRUE
chr23	11434235	11434374	Nanog_256_peak_7876	213	.	13.0917	25.5102	21.3277	45	FALSE
chr23	12817269	12817369	Nanog_256_peak_7883	140	.	10.4184	17.8762	14.0513	45	FALSE
chr23	14007790	14007972	Nanog_256_peak_7891	270	.	13.0181	31.4443	27.025	118	TRUE
chr23	14405115	14405337	Nanog_256_peak_7895	221	.	12.9741	26.4015	22.1824	36	TRUE
chr23	14810499	14810613	Nanog_256_peak_7900	191	.	11.069	23.2189	19.1358	63	TRUE
chr23	14811164	14811275	Nanog_256_peak_7901	242	.	12.8159	28.5375	24.2334	37	TRUE
chr23	16424041	16424253	Nanog_256_peak_7916	186	.	11.7544	22.7252	18.6617	77	FALSE
chr23	16691627	16691824	Nanog_256_peak_7919	355	.	17.3961	40.2608	35.5278	40	TRUE
chr23	16776564	16776689	Nanog_256_peak_7920	275	.	15.9164	32.0245	27.5838	65	FALSE
chr23	16805203	16805303	Nanog_256_peak_7921	185	.	12.6851	22.6521	18.5919	33	FALSE
chr23	17786385	17786700	Nanog_256_peak_7931	266	.	11.4022	31.0923	26.6871	240	TRUE
chr23	17958228	17958598	Nanog_256_peak_7932	148	.	10.2212	18.6944	14.8257	48	FALSE
chr23	18792937	18793157	Nanog_256_peak_7943	206	.	12.044	24.8469	20.6947	62	FALSE
chr23	18854411	18854595	Nanog_256_peak_7946	390	.	17.8386	43.9185	39.0697	70	TRUE
chr23	18982688	18982876	Nanog_256_peak_7948	333	.	14.8412	38.0351	33.3752	46	TRUE
chr23	19256300	19256608	Nanog_256_peak_7953	217	.	12.3487	25.9352	21.7351	202	TRUE
chr23	20518443	20518602	Nanog_256_peak_7965	263	.	13.722	30.6964	26.304	107	TRUE
chr23	20563805	20564002	Nanog_256_peak_7967	182	.	11.172	22.2828	18.2399	89	TRUE
chr23	20865294	20865607	Nanog_256_peak_7971	354	.	11.4432	40.1898	35.4592	248	FALSE
chr23	21614203	21614372	Nanog_256_peak_7978	250	.	14.0742	29.4194	25.077	90	TRUE
chr23	21765239	21765594	Nanog_256_peak_7979	233	.	11.5327	27.5761	23.3106	148	FALSE
chr23	23401371	23401478	Nanog_256_peak_8001	156	.	10.7628	19.6073	15.6946	55	FALSE
chr23	24699088	24699248	Nanog_256_peak_8015	176	.	11.4014	21.6269	17.6149	84	TRUE
chr23	24954858	24954998	Nanog_256_peak_8022	193	.	11.8838	23.4684	19.3735	70	FALSE
chr23	25868594	25868800	Nanog_256_peak_8031	242	.	13.5342	28.5129	24.2092	115	FALSE
chr23	25879719	25880051	Nanog_256_peak_8033	239	.	13.3633	28.2266	23.9348	237	FALSE
chr23	27195420	27195583	Nanog_256_peak_8053	250	.	15.4366	29.3985	25.0569	47	FALSE
chr23	27649629	27649998	Nanog_256_peak_8058	264	.	12.3176	30.8625	26.4639	237	FALSE
chr23	28811377	28811575	Nanog_256_peak_8072	197	.	11.0941	23.832	19.7188	53	TRUE
chr23	29130445	29130602	Nanog_256_peak_8075	164	.	11.5827	20.3532	16.4021	87	TRUE
chr23	31053906	31054123	Nanog_256_peak_8100	205	.	13.3939	24.7292	20.5813	163	FALSE
chr23	31172707	31172818	Nanog_256_peak_8105	142	.	10.5351	18.0934	14.2574	61	TRUE
chr23	31257918	31258028	Nanog_256_peak_8107	237	.	13.6133	28.052	23.7671	56	TRUE
chr23	31372806	31373062	Nanog_256_peak_8109	262	.	14.4355	30.6347	26.2451	119	FALSE
chr23	32233330	32233717	Nanog_256_peak_8120	257	.	12.9918	30.102	25.7339	67	FALSE
chr23	32281959	32282176	Nanog_256_peak_8121	208	.	13.0929	25.0138	20.8537	133	FALSE
chr23	32799570	32800160	Nanog_256_peak_8124	172	.	10.2036	21.2116	17.2203	300	FALSE
chr23	33546097	33546512	Nanog_256_peak_8130	344	.	16.3078	39.1322	34.4338	259	FALSE
chr23	33618405	33618556	Nanog_256_peak_8131	175	.	10.7501	21.5818	17.5728	88	FALSE
chr23	35399848	35400060	Nanog_256_peak_8148	256	.	15.3723	30.0469	25.6805	61	FALSE
chr23	35765639	35765933	Nanog_256_peak_8153	302	.	14.9776	34.7935	30.253	44	TRUE
chr23	36177019	36177135	Nanog_256_peak_8168	217	.	11.3074	25.9644	21.7633	63	TRUE
chr23	36301228	36301465	Nanog_256_peak_8175	222	.	11.9474	26.4556	22.2341	136	FALSE
chr23	37809393	37809775	Nanog_256_peak_8187	468	.	15.1528	51.884	46.8272	195	FALSE
chr23	37814978	37815201	Nanog_256_peak_8189	525	.	14.7534	57.7785	52.5593	150	FALSE
chr23	37861374	37861524	Nanog_256_peak_8192	151	.	11.0292	19.0425	15.1569	75	FALSE
chr23	38942847	38943084	Nanog_256_peak_8205	383	.	14.5181	43.1988	38.3728	80	FALSE
chr23	40949853	40950035	Nanog_256_peak_8219	172	.	11.6921	21.2207	17.2287	98	FALSE
chr23	43638735	43639075	Nanog_256_peak_8252	273	.	13.9889	31.793	27.3614	263	TRUE
chr23	44961596	44961816	Nanog_256_peak_8267	195	.	11.0141	23.6971	19.5904	78	TRUE
chr23	45025708	45025858	Nanog_256_peak_8270	207	.	13.3058	24.9434	20.7869	92	FALSE
chr23	45092166	45092699	Nanog_256_peak_8271	324	.	15.0873	37.0512	32.4265	306	TRUE
chr23	45571358	45571527	Nanog_256_peak_8274	264	.	15.242	30.8347	26.4369	61	FALSE
chr23	45769913	45770055	Nanog_256_peak_8278	167	.	11.4231	20.7461	16.7778	75	FALSE
chr24	1676054	1676197	Nanog_256_peak_8304	380	.	20.0594	42.8801	38.0629	61	TRUE
chr24	1901550	1902047	Nanog_256_peak_8305	193	.	11.1742	23.395	19.3032	332	TRUE
chr24	2041624	2041852	Nanog_256_peak_8308	142	.	10.099	18.0467	14.2127	90	FALSE
chr24	3532762	3533091	Nanog_256_peak_8327	145	.	10.0375	18.3879	14.535	273	TRUE
chr24	4130808	4130977	Nanog_256_peak_8341	297	.	12.7276	34.2381	29.7164	125	TRUE
chr24	4148884	4149155	Nanog_256_peak_8342	521	.	20.6238	57.4081	52.1993	185	FALSE
chr24	4447889	4448211	Nanog_256_peak_8351	340	.	14.4468	38.7537	34.068	181	FALSE
chr24	4969671	4969842	Nanog_256_peak_8356	332	.	14.3951	37.9535	33.2968	65	TRUE
chr24	5009905	5010158	Nanog_256_peak_8363	187	.	10.8444	22.8422	18.7737	156	FALSE
chr24	5452022	5452257	Nanog_256_peak_8368	240	.	12.673	28.2963	24.0014	94	FALSE
chr24	5924306	5924556	Nanog_256_peak_8374	260	.	14.6929	30.4653	26.0822	83	FALSE
chr24	6141042	6141143	Nanog_256_peak_8376	141	.	10.4765	17.9839	14.1535	47	FALSE
chr24	7511226	7511358	Nanog_256_peak_8385	142	.	10.1232	18.0876	14.2523	60	FALSE
chr24	8514597	8515079	Nanog_256_peak_8391	255	.	12.5186	29.9291	25.5689	222	FALSE
chr24	8640438	8640710	Nanog_256_peak_8393	390	.	19.1475	43.9385	39.0889	78	FALSE
chr24	8654428	8654573	Nanog_256_peak_8394	378	.	14.2129	42.6106	37.8013	82	TRUE
chr24	8654878	8655109	Nanog_256_peak_8395	524	.	17.6117	57.6366	52.4209	111	TRUE
chr24	9479172	9479439	Nanog_256_peak_8408	172	.	10.8658	21.2429	17.2496	116	FALSE
chr24	9496041	9496231	Nanog_256_peak_8409	164	.	10.9597	20.3993	16.4459	130	FALSE
chr24	10299896	10300174	Nanog_256_peak_8415	363	.	16.637	41.1353	36.3712	83	TRUE
chr24	10528671	10528868	Nanog_256_peak_8418	253	.	14.2639	29.7391	25.3863	97	TRUE
chr24	10650031	10650325	Nanog_256_peak_8422	251	.	11.9369	29.5431	25.1957	105	TRUE
chr24	12408513	12408701	Nanog_256_peak_8444	447	.	17.6527	49.7437	44.7434	113	FALSE
chr24	12833826	12834148	Nanog_256_peak_8451	286	.	10.2847	33.1275	28.6478	140	FALSE
chr24	13274622	13275024	Nanog_256_peak_8455	249	.	11.121	29.3045	24.9666	243	FALSE
chr24	14446309	14446484	Nanog_256_peak_8466	225	.	14.0913	26.8024	22.5675	71	FALSE
chr24	14591088	14591481	Nanog_256_peak_8470	256	.	12.1805	29.976	25.6128	179	TRUE
chr24	15229132	15229237	Nanog_256_peak_8479	162	.	10.5266	20.1666	16.2258	71	FALSE
chr24	15365726	15366055	Nanog_256_peak_8483	155	.	11.1312	19.4931	15.5855	167	TRUE
chr24	16819695	16819806	Nanog_256_peak_8493	561	.	26.255	61.4509	56.1485	54	FALSE
chr24	17334547	17334713	Nanog_256_peak_8509	138	.	10.2762	17.6144	13.8029	60	FALSE
chr24	17622656	17622835	Nanog_256_peak_8512	278	.	14.3186	32.3486	27.8965	118	FALSE
chr24	17807126	17807493	Nanog_256_peak_8513	760	.	19.535	81.7898	76.0916	175	TRUE
chr24	18461787	18462189	Nanog_256_peak_8516	170	.	11.0693	21.0698	17.0846	183	FALSE
chr24	18787675	18787905	Nanog_256_peak_8518	264	.	14.8997	30.8173	26.4204	115	TRUE
chr24	19514959	19515289	Nanog_256_peak_8522	264	.	11.2839	30.8651	26.4664	187	FALSE
chr24	19754711	19754971	Nanog_256_peak_8526	263	.	13.3731	30.751	26.3562	94	TRUE
chr24	20267016	20267182	Nanog_256_peak_8532	317	.	15.071	36.3253	31.7296	104	TRUE
chr24	21099866	21100024	Nanog_256_peak_8541	142	.	10.099	18.0467	14.2127	108	TRUE
chr24	21148398	21148589	Nanog_256_peak_8542	235	.	12.7575	27.8207	23.5462	83	FALSE
chr24	21540439	21540895	Nanog_256_peak_8545	323	.	13.8516	36.9766	32.355	104	TRUE
chr24	21682068	21682299	Nanog_256_peak_8549	383	.	15.2813	43.1661	38.341	131	FALSE
chr24	23515322	23515628	Nanog_256_peak_8562	294	.	14.8975	33.9851	29.4743	172	FALSE
chr24	23612461	23612732	Nanog_256_peak_8563	219	.	12.4746	26.1456	21.9374	96	TRUE
chr24	23627799	23628015	Nanog_256_peak_8564	298	.	14.7219	34.3609	29.836	127	TRUE
chr24	23653738	23653894	Nanog_256_peak_8565	235	.	14.14	27.8411	23.566	94	TRUE
chr24	24357476	24357833	Nanog_256_peak_8576	210	.	11.5838	25.2424	21.0717	161	FALSE
chr24	24463700	24463991	Nanog_256_peak_8578	403	.	14.42	45.1911	40.3062	168	TRUE
chr24	25516929	25517338	Nanog_256_peak_8596	281	.	12.2015	32.6012	28.1406	259	TRUE
chr24	27681542	27681940	Nanog_256_peak_8622	168	.	10.9224	20.8246	16.8523	143	FALSE
chr24	32199522	32199767	Nanog_256_peak_8654	226	.	12.9228	26.8944	22.6553	72	FALSE
chr24	32485699	32485918	Nanog_256_peak_8658	159	.	11.1644	19.893	15.9657	75	TRUE
chr24	33542031	33542265	Nanog_256_peak_8668	304	.	16.2878	35.0199	30.4708	64	FALSE
chr24	34036892	34037088	Nanog_256_peak_8671	162	.	11.4829	20.1598	16.2192	128	FALSE
chr24	34110381	34110869	Nanog_256_peak_8675	481	.	16.5975	53.2695	48.1717	293	FALSE
chr24	36480404	36481259	Nanog_256_peak_8704	440	.	11.0939	49.0127	44.0358	550	TRUE
chr24	38786606	38787024	Nanog_256_peak_8721	498	.	18.7948	54.992	49.8463	308	FALSE
chr24	40727360	40727590	Nanog_256_peak_8733	311	.	16.3038	35.6917	31.1176	82	FALSE
chr24	40845343	40845502	Nanog_256_peak_8735	252	.	14.1684	29.5781	25.2297	78	FALSE
chr24	41160560	41160808	Nanog_256_peak_8740	151	.	10.6584	19.0037	15.1201	168	FALSE
chr24	41220541	41220722	Nanog_256_peak_8741	285	.	16.6948	32.9791	28.5049	79	TRUE
chr24	41334649	41334765	Nanog_256_peak_8744	163	.	11.5492	20.2881	16.3408	65	FALSE
chr24	41606043	41606219	Nanog_256_peak_8749	142	.	10.3263	18.0387	14.2052	96	FALSE
chr25	234611	234765	Nanog_256_peak_8758	207	.	13.5093	24.9516	20.7946	67	FALSE
chr25	381335	381573	Nanog_256_peak_8763	259	.	14.5916	30.2934	25.9174	138	FALSE
chr25	2592378	2592537	Nanog_256_peak_8784	157	.	11.225	19.6687	15.753	81	FALSE
chr25	2723307	2723574	Nanog_256_peak_8787	152	.	10.7668	19.1922	15.2988	75	TRUE
chr25	4366309	4366503	Nanog_256_peak_8806	283	.	15.3896	32.8649	28.3943	70	TRUE
chr25	4738214	4739257	Nanog_256_peak_8812	335	.	10.108	38.1696	33.5044	341	FALSE
chr25	6261667	6261783	Nanog_256_peak_8829	219	.	13.7177	26.1223	21.9151	38	FALSE
chr25	6390023	6390344	Nanog_256_peak_8831	401	.	17.6224	45.0544	40.1722	213	FALSE
chr25	7538802	7538955	Nanog_256_peak_8841	156	.	11.1623	19.5511	15.6409	43	FALSE
chr25	9286167	9286508	Nanog_256_peak_8854	332	.	12.8635	37.8763	33.2227	244	FALSE
chr25	10012136	10012253	Nanog_256_peak_8858	180	.	12.4482	22.1286	18.0925	71	TRUE
chr25	11029881	11030123	Nanog_256_peak_8867	188	.	12.1893	22.9681	18.8943	73	TRUE
chr25	11383941	11384159	Nanog_256_peak_8871	178	.	11.813	21.8572	17.8342	94	TRUE
chr25	12475473	12475738	Nanog_256_peak_8877	198	.	12.4622	23.9237	19.8065	97	TRUE
chr25	13258688	13258927	Nanog_256_peak_8880	147	.	10.6565	18.6249	14.76	148	FALSE
chr25	13264056	13264237	Nanog_256_peak_8881	382	.	19.4471	43.0666	38.2446	91	FALSE
chr25	14428101	14428275	Nanog_256_peak_8890	161	.	11.0557	20.1084	16.1698	53	TRUE
chr25	14508381	14508692	Nanog_256_peak_8893	413	.	10.7902	46.2269	41.3164	210	FALSE
chr25	14537204	14537633	Nanog_256_peak_8896	213	.	11.7336	25.4952	21.3132	264	TRUE
chr25	14568635	14568989	Nanog_256_peak_8897	395	.	16.8224	44.4271	39.5634	239	TRUE
chr25	14873401	14873570	Nanog_256_peak_8900	167	.	11.4231	20.7461	16.7778	28	FALSE
chr25	15239559	15239872	Nanog_256_peak_8904	359	.	16.3928	40.7182	35.97	183	TRUE
chr25	16464886	16465188	Nanog_256_peak_8915	325	.	14.7444	37.1607	32.5327	182	FALSE
chr25	16551585	16551791	Nanog_256_peak_8917	151	.	10.8887	19.0454	15.1593	72	FALSE
chr25	16781863	16782059	Nanog_256_peak_8920	195	.	11.9891	23.6446	19.5405	62	FALSE
chr25	17585630	17585748	Nanog_256_peak_8927	132	.	10.1029	17.0314	13.2503	69	FALSE
chr25	17658213	17658800	Nanog_256_peak_8928	261	.	13.2757	30.5855	26.1977	55	TRUE
chr25	17885317	17885525	Nanog_256_peak_8931	212	.	12.7075	25.3935	21.2163	102	FALSE
chr25	18331407	18331622	Nanog_256_peak_8936	577	.	14.4618	63.0569	57.7219	80	TRUE
chr25	18333192	18333513	Nanog_256_peak_8937	327	.	10.5354	37.3989	32.7634	146	FALSE
chr25	18415629	18415808	Nanog_256_peak_8938	168	.	11.8224	20.8265	16.8541	116	FALSE
chr25	18436211	18436307	Nanog_256_peak_8939	137	.	10.2482	17.5633	13.7546	26	FALSE
chr25	18858420	18858542	Nanog_256_peak_8942	392	.	21.3682	44.0635	39.2105	51	FALSE
chr25	20467985	20468451	Nanog_256_peak_8954	356	.	13.7943	40.3768	35.6408	219	TRUE
chr25	20554928	20555197	Nanog_256_peak_8955	169	.	11.5114	20.9011	16.9257	192	TRUE
chr25	20764303	20764557	Nanog_256_peak_8958	282	.	14.9425	32.7471	28.2815	52	FALSE
chr25	21599694	21599807	Nanog_256_peak_8964	192	.	12.4036	23.3393	19.2502	49	TRUE
chr25	22887405	22887667	Nanog_256_peak_8973	155	.	10.4253	19.5049	15.5966	58	TRUE
chr25	22904602	22904783	Nanog_256_peak_8974	189	.	12.2498	23.0725	18.995	107	FALSE
chr25	25507337	25507456	Nanog_256_peak_8991	157	.	10.7888	19.6516	15.7371	54	FALSE
chr25	25544111	25544276	Nanog_256_peak_8992	208	.	11.8234	25.0571	20.8947	122	FALSE
chr25	25550802	25550946	Nanog_256_peak_8994	192	.	11.1108	23.2889	19.2024	72	FALSE
chr25	30195717	30196167	Nanog_256_peak_9024	402	.	15.5176	45.0869	40.2039	245	TRUE
chr25	31956824	31957210	Nanog_256_peak_9039	369	.	12.1258	41.7518	36.9701	210	FALSE
chr25	32870134	32870275	Nanog_256_peak_9052	190	.	12.3108	23.1782	19.0964	47	TRUE
chr25	32915183	32915509	Nanog_256_peak_9053	180	.	10.7069	22.0547	18.0224	254	FALSE
chr25	33295153	33295340	Nanog_256_peak_9057	133	.	10.0297	17.1683	13.3795	36	FALSE
chr25	34156178	34156575	Nanog_256_peak_9064	408	.	10.8561	45.7766	40.8785	109	FALSE
chr25	34161583	34161946	Nanog_256_peak_9067	557	.	13.7001	61.0519	55.7592	212	FALSE
chr25	34908077	34908372	Nanog_256_peak_9077	476	.	20.7303	52.693	47.614	62	FALSE
chr25	35019938	35020110	Nanog_256_peak_9080	303	.	17.2002	34.872	30.3287	88	TRUE
chr25	35155425	35155579	Nanog_256_peak_9085	282	.	14.9109	32.694	28.2302	98	FALSE
chr25	36291958	36292062	Nanog_256_peak_9099	136	.	10.3096	17.4321	13.6298	61	FALSE
chr3	138647	138837	Nanog_256_peak_9114	237	.	14.7333	28.0087	23.7255	81	FALSE
chr3	151609	151867	Nanog_256_peak_9115	177	.	12.0063	21.7845	17.7651	103	TRUE
chr3	1106853	1107076	Nanog_256_peak_9117	172	.	11.7228	21.2753	17.2805	133	FALSE
chr3	1489272	1489465	Nanog_256_peak_9125	253	.	12.0294	29.7079	25.3558	102	FALSE
chr3	1493502	1493620	Nanog_256_peak_9127	254	.	12.0856	29.8078	25.4523	27	FALSE
chr3	3447703	3448099	Nanog_256_peak_9130	363	.	18.2906	41.0787	36.3166	280	TRUE
chr3	3959167	3959331	Nanog_256_peak_9134	283	.	16.7898	32.782	28.3145	64	TRUE
chr3	5067632	5067792	Nanog_256_peak_9138	151	.	10.6584	19.0037	15.1201	45	TRUE
chr3	5437017	5437121	Nanog_256_peak_9142	152	.	10.9483	19.1547	15.2633	44	FALSE
chr3	5949973	5950163	Nanog_256_peak_9146	133	.	10.0297	17.1683	13.3795	38	FALSE
chr3	8676109	8676329	Nanog_256_peak_9162	147	.	10.4223	18.5968	14.7337	49	FALSE
chr3	10285093	10285226	Nanog_256_peak_9173	152	.	11.1222	19.1224	15.2327	50	FALSE
chr3	10450265	10450406	Nanog_256_peak_9176	269	.	16.0727	31.3653	26.9492	94	FALSE
chr3	11828194	11828360	Nanog_256_peak_9188	147	.	10.4223	18.5968	14.7337	57	FALSE
chr3	12554335	12554768	Nanog_256_peak_9195	286	.	12.8248	33.0827	28.6041	357	FALSE
chr3	15395098	15395348	Nanog_256_peak_9213	276	.	14.9183	32.0695	27.6266	133	TRUE
chr3	16132908	16133106	Nanog_256_peak_9222	276	.	14.5421	32.0745	27.6313	79	TRUE
chr3	16227662	16227826	Nanog_256_peak_9225	585	.	24.8803	63.8573	58.5023	84	FALSE
chr3	16663989	16664148	Nanog_256_peak_9229	342	.	18.2186	38.9821	34.289	79	FALSE
chr3	16722023	16722242	Nanog_256_peak_9230	207	.	13.027	24.8986	20.7438	108	TRUE
chr3	16834777	16834950	Nanog_256_peak_9233	695	.	25.2941	75.1756	69.5978	69	TRUE
chr3	17951538	17951714	Nanog_256_peak_9241	252	.	15.1252	29.5942	25.2454	96	FALSE
chr3	18372900	18373064	Nanog_256_peak_9245	169	.	11.275	20.9329	16.9558	114	FALSE
chr3	19115760	19115955	Nanog_256_peak_9251	684	.	27.2577	74.0118	68.4572	130	TRUE
chr3	19374982	19375264	Nanog_256_peak_9255	144	.	10.221	18.2533	14.4088	93	FALSE
chr3	21183795	21184248	Nanog_256_peak_9271	289	.	14.58	33.4498	28.958	159	TRUE
chr3	21670079	21670393	Nanog_256_peak_9276	337	.	14.2714	38.4372	33.7636	69	FALSE
chr3	21941469	21941555	Nanog_256_peak_9281	188	.	10.576	22.9541	18.8812	40	FALSE
chr3	21988413	21988624	Nanog_256_peak_9283	255	.	14.3932	29.9575	25.596	90	FALSE
chr3	22545561	22545732	Nanog_256_peak_9290	166	.	11.7185	20.6197	16.6569	81	FALSE
chr3	23282710	23282977	Nanog_256_peak_9297	183	.	11.8672	22.4157	18.3663	77	TRUE
chr3	23604350	23604452	Nanog_256_peak_9307	161	.	11.2534	20.0524	16.1172	36	FALSE
chr3	23644905	23645073	Nanog_256_peak_9309	294	.	14.0984	33.9749	29.4643	78	TRUE
chr3	23656739	23656965	Nanog_256_peak_9310	349	.	13.8122	39.7052	34.9887	112	TRUE
chr3	23731702	23732009	Nanog_256_peak_9315	263	.	10.3019	30.7396	26.3455	132	FALSE
chr3	23860977	23861230	Nanog_256_peak_9322	257	.	13.3836	30.1262	25.7566	78	TRUE
chr3	24111595	24111845	Nanog_256_peak_9329	177	.	11.7834	21.8058	17.7852	96	FALSE
chr3	24118889	24119092	Nanog_256_peak_9330	188	.	11.8895	22.9523	18.8794	57	FALSE
chr3	24187743	24188135	Nanog_256_peak_9333	282	.	14.1683	32.7539	28.2877	97	FALSE
chr3	24197916	24198037	Nanog_256_peak_9334	287	.	15.9764	33.256	28.7728	62	FALSE
chr3	24595631	24595994	Nanog_256_peak_9338	237	.	13.2242	27.9938	23.711	192	FALSE
chr3	24756271	24756502	Nanog_256_peak_9339	150	.	10.8005	18.8847	15.0069	117	TRUE
chr3	25078996	25079197	Nanog_256_peak_9344	314	.	16.1438	36.0834	31.4957	64	TRUE
chr3	25086969	25087181	Nanog_256_peak_9345	230	.	13.1733	27.3137	23.0599	31	FALSE
chr3	25280053	25280396	Nanog_256_peak_9348	223	.	12.3738	26.5707	22.3456	160	FALSE
chr3	25491255	25491415	Nanog_256_peak_9353	148	.	10.685	18.6761	14.8086	64	FALSE
chr3	25907711	25908138	Nanog_256_peak_9360	351	.	16.7266	39.8414	35.1216	365	FALSE
chr3	26077003	26077143	Nanog_256_peak_9362	259	.	15.4989	30.2812	25.9058	75	FALSE
chr3	26110840	26111017	Nanog_256_peak_9364	149	.	10.0468	18.8767	14.9992	103	FALSE
chr3	26225926	26226191	Nanog_256_peak_9365	238	.	12.2242	28.1561	23.8675	214	FALSE
chr3	29278218	29278414	Nanog_256_peak_9390	264	.	14.8997	30.8173	26.4204	67	FALSE
chr3	29899828	29900132	Nanog_256_peak_9393	556	.	19.7998	60.9569	55.6664	137	FALSE
chr3	30317739	30317933	Nanog_256_peak_9399	172	.	11.4395	21.2135	17.2219	76	FALSE
chr3	30771189	30771523	Nanog_256_peak_9405	391	.	16.5963	44.0316	39.1798	146	FALSE
chr3	31263633	31264047	Nanog_256_peak_9416	163	.	10.5944	20.279	16.3318	58	FALSE
chr3	32329263	32329565	Nanog_256_peak_9425	401	.	14.7149	45.0401	40.1586	176	FALSE
chr3	32842532	32842771	Nanog_256_peak_9432	173	.	11.4954	21.3093	17.3129	97	FALSE
chr3	32967950	32968069	Nanog_256_peak_9433	141	.	10.2732	17.9456	14.1172	66	FALSE
chr3	33762826	33763130	Nanog_256_peak_9442	598	.	16.2972	65.237	59.8579	182	TRUE
chr3	33765462	33765704	Nanog_256_peak_9443	503	.	14.7262	55.4646	50.3067	107	FALSE
chr3	34461096	34461500	Nanog_256_peak_9449	312	.	14.3703	35.8132	31.2346	152	FALSE
chr3	35434500	35434736	Nanog_256_peak_9459	359	.	15.9467	40.6791	35.9335	63	TRUE
chr3	36218687	36218870	Nanog_256_peak_9469	142	.	10.652	18.1198	14.2827	113	FALSE
chr3	36565822	36566033	Nanog_256_peak_9475	129	.	10.0023	16.6783	12.9167	78	TRUE
chr3	36612580	36612944	Nanog_256_peak_9477	318	.	12.4849	36.4563	31.8544	287	TRUE
chr3	37601370	37601488	Nanog_256_peak_9485	317	.	18.409	36.3403	31.7436	62	FALSE
chr3	37699999	37700103	Nanog_256_peak_9488	172	.	11.6921	21.2207	17.2287	59	FALSE
chr3	38808762	38808885	Nanog_256_peak_9494	135	.	10.2497	17.3149	13.5191	44	FALSE
chr3	39082703	39083000	Nanog_256_peak_9500	214	.	13.4328	25.6127	21.4259	133	FALSE
chr3	39257721	39258012	Nanog_256_peak_9501	244	.	12.2087	28.7561	24.4414	132	FALSE
chr3	39491029	39491385	Nanog_256_peak_9503	642	.	21.7252	69.6698	64.2027	199	FALSE
chr3	39695820	39696087	Nanog_256_peak_9508	243	.	13.6213	28.6588	24.3491	156	FALSE
chr3	40570299	40570717	Nanog_256_peak_9522	555	.	20.2056	60.856	55.5681	252	TRUE
chr3	40589185	40589405	Nanog_256_peak_9524	142	.	10.353	18.0857	14.2506	67	TRUE
chr3	41278034	41278285	Nanog_256_peak_9529	170	.	11.3293	21.0253	17.0434	154	TRUE
chr3	41797289	41797601	Nanog_256_peak_9535	199	.	11.2368	24.0725	19.9496	63	FALSE
chr3	41821988	41822243	Nanog_256_peak_9537	152	.	10.4605	19.0958	15.2075	59	FALSE
chr3	41903202	41903443	Nanog_256_peak_9539	266	.	11.4022	31.0923	26.6871	76	FALSE
chr3	42066719	42066955	Nanog_256_peak_9545	225	.	13.5299	26.7875	22.5534	51	FALSE
chr3	42474611	42474755	Nanog_256_peak_9551	194	.	12.9454	23.5484	19.4496	61	FALSE
chr3	43089573	43089822	Nanog_256_peak_9563	470	.	20.4033	52.1369	47.0713	136	TRUE
chr3	43536718	43537024	Nanog_256_peak_9571	195	.	12.2847	23.621	19.5184	92	FALSE
chr3	43674308	43674622	Nanog_256_peak_9574	363	.	14.9623	41.1211	36.3577	66	TRUE
chr3	45365714	45365938	Nanog_256_peak_9596	192	.	12.1121	23.3282	19.2397	150	TRUE
chr3	45780453	45780654	Nanog_256_peak_9603	170	.	10.3988	20.9975	17.0169	120	FALSE
chr3	45787858	45788254	Nanog_256_peak_9605	335	.	13.7914	38.2613	33.5935	249	TRUE
chr3	47168496	47168766	Nanog_256_peak_9614	142	.	10.1475	18.1286	14.2911	78	FALSE
chr3	48028479	48028630	Nanog_256_peak_9622	249	.	14.9648	29.3034	24.9655	74	FALSE
chr3	48463200	48463347	Nanog_256_peak_9624	166	.	11.3362	20.5942	16.6323	73	FALSE
chr3	48930391	48930556	Nanog_256_peak_9627	147	.	10.1747	18.6166	14.752	82	FALSE
chr3	49446941	49447059	Nanog_256_peak_9631	132	.	10.1029	17.0314	13.2503	84	FALSE
chr3	49504039	49504149	Nanog_256_peak_9632	168	.	10.9224	20.8246	16.8523	56	FALSE
chr3	51760745	51760987	Nanog_256_peak_9656	212	.	12.7075	25.3935	21.2163	168	FALSE
chr3	51827520	51827777	Nanog_256_peak_9660	470	.	17.6784	52.1587	47.0919	103	TRUE
chr3	53032575	53032688	Nanog_256_peak_9666	230	.	14.1167	27.3009	23.0475	65	TRUE
chr3	53276909	53277218	Nanog_256_peak_9667	181	.	12.0243	22.2262	18.1855	250	TRUE
chr3	53800839	53801152	Nanog_256_peak_9669	178	.	11.5346	21.8513	17.8289	202	FALSE
chr3	55095009	55095160	Nanog_256_peak_9682	212	.	12.0328	25.4073	21.229	71	FALSE
chr3	55364066	55364165	Nanog_256_peak_9685	243	.	14.5783	28.6118	24.3047	78	FALSE
chr3	56947235	56947356	Nanog_256_peak_9694	215	.	13.2521	25.786	21.5911	56	TRUE
chr3	57039141	57039529	Nanog_256_peak_9696	431	.	14.424	48.1271	43.171	190	TRUE
chr3	57630769	57630935	Nanog_256_peak_9699	221	.	14.0636	26.3589	22.1409	57	FALSE
chr3	57945358	57945629	Nanog_256_peak_9703	265	.	13.4719	30.9187	26.5184	147	TRUE
chr3	58301582	58302282	Nanog_256_peak_9707	252	.	12.6977	29.5988	25.25	82	TRUE
chr3	59380696	59380941	Nanog_256_peak_9717	239	.	14.652	28.2687	23.9747	90	TRUE
chr3	59421927	59422070	Nanog_256_peak_9718	249	.	13.9812	29.263	24.927	58	FALSE
chr3	59899863	59899984	Nanog_256_peak_9721	196	.	12.0694	23.779	19.6682	50	TRUE
chr3	60034011	60034190	Nanog_256_peak_9725	198	.	12.9871	23.9616	19.8432	97	FALSE
chr3	60083091	60083285	Nanog_256_peak_9728	188	.	11.2399	22.9434	18.8708	100	TRUE
chr3	60495730	60495993	Nanog_256_peak_9732	341	.	17.7842	38.869	34.1803	175	FALSE
chr3	60589575	60589730	Nanog_256_peak_9735	140	.	10.5249	17.8607	14.0369	87	FALSE
chr3	60809203	60809305	Nanog_256_peak_9739	196	.	10.705	23.7473	19.6383	35	FALSE
chr3	61368637	61368732	Nanog_256_peak_9747	175	.	11.3752	21.5827	17.5735	62	FALSE
chr3	61521728	61521963	Nanog_256_peak_9752	330	.	13.8921	37.7473	33.0983	64	TRUE
chr3	61895586	61895738	Nanog_256_peak_9755	176	.	12.1235	21.6669	17.6534	105	FALSE
chr3	62158687	62159052	Nanog_256_peak_9763	154	.	10.5844	19.3048	15.4064	254	FALSE
chr3	62288190	62288369	Nanog_256_peak_9766	185	.	12.4408	22.5844	18.5273	75	FALSE
chr3	62328529	62328636	Nanog_256_peak_9768	192	.	12.6722	23.3827	19.2914	43	TRUE
chr4	63448	63698	Nanog_256_peak_9772	277	.	11.3353	32.23	27.7821	143	FALSE
chr4	446865	447163	Nanog_256_peak_9778	457	.	18.2351	50.7793	45.751	96	TRUE
chr4	456236	456612	Nanog_256_peak_9779	514	.	20.1987	56.6655	51.4753	203	TRUE
chr4	805793	806324	Nanog_256_peak_9781	146	.	10.0828	18.4633	14.6067	65	FALSE
chr4	1121469	1121766	Nanog_256_peak_9790	242	.	14.2301	28.5315	24.2275	131	TRUE
chr4	1396638	1396999	Nanog_256_peak_9794	283	.	14.9742	32.8004	28.3319	313	TRUE
chr4	4187978	4188120	Nanog_256_peak_9833	144	.	10.2457	18.2954	14.4485	44	FALSE
chr4	4392028	4392242	Nanog_256_peak_9837	172	.	11.4674	21.2612	17.2674	114	FALSE
chr4	4414611	4414783	Nanog_256_peak_9838	135	.	10.2796	17.3732	13.5737	80	TRUE
chr4	4602460	4602711	Nanog_256_peak_9840	146	.	10.1285	18.5395	14.6793	213	TRUE
chr4	4848019	4848420	Nanog_256_peak_9843	258	.	13.4602	30.2554	25.8806	190	FALSE
chr4	4883979	4884223	Nanog_256_peak_9844	190	.	11.972	23.0914	19.013	132	TRUE
chr4	4917272	4917946	Nanog_256_peak_9845	279	.	11.772	32.4399	27.9851	295	FALSE
chr4	5084146	5084268	Nanog_256_peak_9847	224	.	14.2256	26.6719	22.4428	60	FALSE
chr4	6534857	6535036	Nanog_256_peak_9865	172	.	11.7228	21.2753	17.2805	44	TRUE
chr4	6868425	6868736	Nanog_256_peak_9867	297	.	15.8487	34.2747	29.7522	68	TRUE
chr4	7451849	7452298	Nanog_256_peak_9872	444	.	12.5168	49.4856	44.4942	218	TRUE
chr4	7452478	7452901	Nanog_256_peak_9873	332	.	10.474	37.8687	33.2153	218	FALSE
chr4	9222256	9222863	Nanog_256_peak_9889	443	.	14.9966	49.3077	44.3227	142	FALSE
chr4	9245038	9245232	Nanog_256_peak_9891	145	.	10.5441	18.4239	14.5693	61	TRUE
chr4	9266743	9266861	Nanog_256_peak_9893	179	.	12.264	21.9391	17.9125	56	FALSE
chr4	9757938	9758055	Nanog_256_peak_9895	173	.	12.0723	21.3339	17.3364	57	TRUE
chr4	9885620	9885809	Nanog_256_peak_9897	154	.	10.8496	19.3368	15.4373	44	TRUE
chr4	10325160	10325344	Nanog_256_peak_9902	151	.	11.0292	19.0425	15.1569	127	FALSE
chr4	10776502	10776930	Nanog_256_peak_9908	200	.	10.9261	24.1257	20.0009	197	FALSE
chr4	12094970	12095185	Nanog_256_peak_9915	223	.	11.3401	26.6259	22.3991	62	FALSE
chr4	12102084	12102564	Nanog_256_peak_9916	338	.	11.5882	38.5629	33.8858	356	TRUE
chr4	12556075	12556242	Nanog_256_peak_9924	206	.	12.6627	24.7787	20.6294	85	FALSE
chr4	14291698	14291824	Nanog_256_peak_9945	185	.	11.9533	22.5628	18.5064	53	FALSE
chr4	14600502	14600675	Nanog_256_peak_9951	184	.	10.326	22.5273	18.4727	98	FALSE
chr4	16161858	16161947	Nanog_256_peak_9971	168	.	11.8637	20.7847	16.8141	56	TRUE
chr4	16564618	16564818	Nanog_256_peak_9973	141	.	10.4765	17.9839	14.1535	127	TRUE
chr4	16859518	16859620	Nanog_256_peak_9975	164	.	10.3859	20.447	16.4918	45	FALSE
chr4	16874034	16874172	Nanog_256_peak_9976	149	.	10.3156	18.8524	14.9759	34	FALSE
chr4	17955182	17955520	Nanog_256_peak_9981	147	.	10.1747	18.6166	14.752	258	FALSE
chr4	18980914	18981063	Nanog_256_peak_9987	169	.	11.248	20.887	16.9122	93	FALSE
chr4	21608562	21608751	Nanog_256_peak_10017	207	.	11.0272	24.8848	20.7307	65	TRUE
chr4	21959642	21959844	Nanog_256_peak_10022	156	.	11.1936	19.6097	15.6967	108	FALSE
chr4	22125193	22125325	Nanog_256_peak_10026	171	.	11.6616	21.1665	17.1772	55	TRUE
chr4	22138743	22138891	Nanog_256_peak_10027	163	.	11.3743	20.2704	16.3237	71	TRUE
chr4	22273474	22273567	Nanog_256_peak_10029	149	.	10.0254	18.8412	14.9654	55	FALSE
chr4	22594906	22595293	Nanog_256_peak_10033	165	.	10.7559	20.5474	16.5881	304	FALSE
chr4	23416583	23416722	Nanog_256_peak_10049	157	.	11.0478	19.6858	15.7695	45	TRUE
chr4	23753927	23754103	Nanog_256_peak_10052	149	.	10.933	18.8538	14.9772	84	FALSE
chr4	25107918	25108181	Nanog_256_peak_10064	202	.	11.4471	24.4263	20.2906	85	TRUE
chr4	25791437	25791574	Nanog_256_peak_10077	218	.	13.6814	26.057	21.8523	70	FALSE
chr4	26861085	26861345	Nanog_256_peak_10090	200	.	12.2887	24.1473	20.0214	192	TRUE
chr4	29381420	29381617	Nanog_256_peak_10104	230	.	13.8283	27.3001	23.047	137	TRUE
chr4	29388510	29388854	Nanog_256_peak_10105	493	.	18.0597	54.459	49.3253	186	TRUE
chr4	29408711	29409109	Nanog_256_peak_10107	185	.	10.7062	22.6098	18.5512	153	FALSE
chr4	29617621	29617751	Nanog_256_peak_10108	209	.	13.3779	25.075	20.9116	55	TRUE
chr4	29918407	29918508	Nanog_256_peak_10111	445	.	23.4319	49.5556	44.5612	44	FALSE
chr4	30101127	30101229	Nanog_256_peak_10113	210	.	13.8068	25.247	21.0753	38	FALSE
chr4	30449601	30449719	Nanog_256_peak_10114	160	.	11.5056	20.0032	16.0699	47	TRUE
chr4	30480690	30480894	Nanog_256_peak_10115	4074	.	70.5153	414.515	407.451	132	TRUE
chr4	30492834	30492957	Nanog_256_peak_10116	225	.	14.4526	26.7564	22.5237	55	FALSE
chr4	30496243	30496347	Nanog_256_peak_10117	191	.	12.9313	23.2172	19.1344	53	TRUE
chr4	31861936	31862090	Nanog_256_peak_10121	220	.	13.7908	26.2543	22.0413	110	FALSE
chr4	32494859	32495031	Nanog_256_peak_10124	139	.	10.1687	17.7633	13.9446	120	FALSE
chr4	33294689	33294924	Nanog_256_peak_10128	275	.	16.1892	32.023	27.5824	145	TRUE
chr4	33646680	33646771	Nanog_256_peak_10129	144	.	10.7386	18.309	14.4604	40	FALSE
chr4	33952091	33952537	Nanog_256_peak_10133	190	.	12.3108	23.1782	19.0964	400	FALSE
chr4	35724898	35725023	Nanog_256_peak_10136	490	.	24.8156	54.221	49.0946	82	FALSE
chr4	36267435	36267723	Nanog_256_peak_10137	180	.	11.6433	22.0353	18.0039	79	FALSE
chr4	37263221	37263380	Nanog_256_peak_10141	842	.	34.4862	90.0883	84.2465	103	FALSE
chr4	37938079	37938247	Nanog_256_peak_10142	247	.	15.2545	29.0309	24.7049	37	TRUE
chr4	38174784	38174929	Nanog_256_peak_10143	317	.	18.409	36.3403	31.7436	68	FALSE
chr4	38924365	38924605	Nanog_256_peak_10145	232	.	14.4453	27.4612	23.2007	64	FALSE
chr4	39305366	39305629	Nanog_256_peak_10148	1164	.	35.3062	122.795	116.481	197	FALSE
chr4	39484683	39484882	Nanog_256_peak_10149	178	.	12.0711	21.9024	17.8776	129	FALSE
chr4	40803952	40804302	Nanog_256_peak_10152	234	.	13.4338	27.7505	23.4788	180	FALSE
chr4	41151210	41151412	Nanog_256_peak_10153	335	.	19.1761	38.256	33.5884	135	FALSE
chr4	41215772	41215880	Nanog_256_peak_10154	144	.	10.7386	18.309	14.4604	39	FALSE
chr4	41619882	41620005	Nanog_256_peak_10156	392	.	21.4772	44.1027	39.2466	64	FALSE
chr4	42248955	42249190	Nanog_256_peak_10158	144	.	10.7386	18.309	14.4604	68	TRUE
chr4	42582568	42582741	Nanog_256_peak_10160	383	.	14.4986	43.1615	38.3366	79	FALSE
chr4	42846990	42847197	Nanog_256_peak_10163	139	.	10.3611	17.7702	13.9506	144	FALSE
chr4	43037624	43037890	Nanog_256_peak_10165	206	.	13.2345	24.8138	20.6628	75	FALSE
chr4	44331650	44331767	Nanog_256_peak_10169	245	.	15.3408	28.8626	24.5435	70	FALSE
chr4	46084644	46084901	Nanog_256_peak_10175	293	.	15.966	33.8445	29.3385	225	FALSE
chr4	46409664	46410079	Nanog_256_peak_10177	787	.	25.3318	84.5293	78.7796	143	FALSE
chr4	46677258	46677439	Nanog_256_peak_10180	420	.	22.1884	46.9467	42.0182	89	FALSE
chr4	47640456	47640702	Nanog_256_peak_10185	258	.	15.225	30.2697	25.8944	104	FALSE
chr4	48140940	48141092	Nanog_256_peak_10188	142	.	10.6493	18.0985	14.2622	15	FALSE
chr4	48437242	48437419	Nanog_256_peak_10190	336	.	17.4542	38.3042	33.6346	42	FALSE
chr4	49162779	49162873	Nanog_256_peak_10192	260	.	15.974	30.3847	26.0048	56	TRUE
chr4	49997293	49997408	Nanog_256_peak_10196	410	.	18.6219	46.0001	41.0938	68	FALSE
chr4	49998345	49998437	Nanog_256_peak_10197	151	.	10.8887	19.0454	15.1593	52	FALSE
chr4	50386043	50386264	Nanog_256_peak_10203	353	.	18.8303	40.0637	35.3382	182	FALSE
chr4	51622663	51622768	Nanog_256_peak_10207	143	.	10.6839	18.1795	14.3389	56	FALSE
chr4	52557816	52557934	Nanog_256_peak_10213	144	.	10.7386	18.309	14.4604	51	FALSE
chr4	53200443	53200824	Nanog_256_peak_10216	731	.	25.2604	78.7982	73.1543	253	FALSE
chr4	53564262	53564470	Nanog_256_peak_10219	276	.	15.3079	32.1104	27.6662	69	FALSE
chr4	53704579	53704733	Nanog_256_peak_10220	350	.	19.6483	39.7209	35.0041	85	FALSE
chr4	54224041	54224208	Nanog_256_peak_10222	180	.	12.4095	22.045	18.0132	105	FALSE
chr4	55715971	55716085	Nanog_256_peak_10231	221	.	13.2754	26.3533	22.1357	86	TRUE
chr4	55717249	55717408	Nanog_256_peak_10232	395	.	19.4555	44.4637	39.5986	31	TRUE
chr4	56796111	56796211	Nanog_256_peak_10233	162	.	11.5718	20.1517	16.2116	71	FALSE
chr4	56836180	56836367	Nanog_256_peak_10234	839	.	34.3184	89.7941	83.9564	62	FALSE
chr4	57308569	57308855	Nanog_256_peak_10239	274	.	16.352	31.9082	27.4728	129	FALSE
chr4	57444222	57444425	Nanog_256_peak_10240	393	.	19.7312	44.238	39.3794	99	TRUE
chr4	58255769	58256075	Nanog_256_peak_10242	541	.	22.2825	59.4316	54.1731	267	FALSE
chr4	58671235	58671361	Nanog_256_peak_10244	505	.	25.8626	55.6772	50.5144	60	FALSE
chr4	59283269	59283368	Nanog_256_peak_10245	245	.	15.3408	28.8626	24.5435	49	FALSE
chr4	59367882	59368189	Nanog_256_peak_10246	514	.	22.1156	56.6624	51.4722	83	FALSE
chr4	59370025	59370173	Nanog_256_peak_10247	179	.	10.9681	21.944	17.917	88	FALSE
chr4	59823828	59824014	Nanog_256_peak_10248	272	.	16.0128	31.696	27.2682	118	FALSE
chr4	62580630	62580856	Nanog_256_peak_10251	400	.	18.8872	44.9506	40.0704	120	FALSE
chr4	63259564	63259723	Nanog_256_peak_10255	144	.	10.7386	18.309	14.4604	44	FALSE
chr4	64017593	64017755	Nanog_256_peak_10256	1445	.	51.5482	151.029	144.503	81	FALSE
chr4	64193719	64194046	Nanog_256_peak_10257	646	.	21.9873	70.1539	64.6756	185	FALSE
chr4	64725964	64726070	Nanog_256_peak_10261	144	.	10.7386	18.309	14.4604	22	FALSE
chr4	65133613	65133824	Nanog_256_peak_10263	645	.	28.9323	70.0664	64.5918	44	FALSE
chr4	65254995	65255242	Nanog_256_peak_10265	359	.	17.2374	40.7047	35.9581	62	FALSE
chr4	69711852	69712138	Nanog_256_peak_10274	142	.	10.3263	18.0387	14.2052	204	FALSE
chr5	1281675	1281943	Nanog_256_peak_10311	253	.	12.7644	29.7131	25.3609	65	FALSE
chr5	1963527	1963633	Nanog_256_peak_10315	141	.	10.5809	17.9398	14.1119	56	FALSE
chr5	2721762	2721906	Nanog_256_peak_10320	145	.	10.7823	18.3901	14.5371	72	FALSE
chr5	3285735	3285946	Nanog_256_peak_10324	189	.	12.2498	23.0725	18.995	130	FALSE
chr5	3722579	3722827	Nanog_256_peak_10327	317	.	12.0799	36.3151	31.7202	171	TRUE
chr5	4296975	4297171	Nanog_256_peak_10331	298	.	15.5393	34.4017	29.8751	127	FALSE
chr5	4419001	4419205	Nanog_256_peak_10334	211	.	12.9662	25.2953	21.1221	126	FALSE
chr5	6618321	6618526	Nanog_256_peak_10347	157	.	11.0478	19.6858	15.7695	88	FALSE
chr5	10470323	10471005	Nanog_256_peak_10365	206	.	10.3276	24.8276	20.6762	535	FALSE
chr5	13085696	13086043	Nanog_256_peak_10378	196	.	11.074	23.7981	19.6864	250	FALSE
chr5	13092638	13092812	Nanog_256_peak_10379	263	.	14.531	30.7955	26.3993	84	FALSE
chr5	13646058	13646284	Nanog_256_peak_10384	293	.	14.8096	33.8369	29.3315	109	FALSE
chr5	14301000	14301230	Nanog_256_peak_10390	151	.	11.0292	19.0425	15.1569	195	FALSE
chr5	14372434	14372668	Nanog_256_peak_10393	363	.	12.1584	41.1528	36.3881	159	TRUE
chr5	14641465	14641625	Nanog_256_peak_10396	179	.	10.9681	21.944	17.917	67	FALSE
chr5	17135342	17135482	Nanog_256_peak_10410	188	.	12.4049	22.9003	18.829	53	TRUE
chr5	17330713	17330851	Nanog_256_peak_10411	150	.	10.3875	18.9731	15.0907	49	TRUE
chr5	17456549	17456660	Nanog_256_peak_10412	150	.	10.6317	18.9574	15.0755	50	TRUE
chr5	17994160	17994271	Nanog_256_peak_10418	199	.	11.5928	24.0944	19.9707	54	FALSE
chr5	18005968	18006253	Nanog_256_peak_10419	166	.	10.1835	20.6386	16.6748	181	TRUE
chr5	18158743	18158929	Nanog_256_peak_10421	178	.	11.2436	21.871	17.8476	70	FALSE
chr5	18765926	18766074	Nanog_256_peak_10428	189	.	11.9444	23.0448	18.9682	63	FALSE
chr5	21037027	21037231	Nanog_256_peak_10449	151	.	10.4117	19.0138	15.1296	77	TRUE
chr5	21220996	21221157	Nanog_256_peak_10453	145	.	10.5441	18.4239	14.5693	89	TRUE
chr5	21933874	21934033	Nanog_256_peak_10455	145	.	10.2955	18.3802	14.5277	75	FALSE
chr5	22057313	22057587	Nanog_256_peak_10457	225	.	12.5202	26.8159	22.5802	59	FALSE
chr5	22063587	22063790	Nanog_256_peak_10458	227	.	12.6449	27.0246	22.7813	73	FALSE
chr5	22709277	22709428	Nanog_256_peak_10472	268	.	13.6485	31.2177	26.8073	85	FALSE
chr5	23136448	23136558	Nanog_256_peak_10476	199	.	12.8222	24.0744	19.9513	34	FALSE
chr5	23694328	23694459	Nanog_256_peak_10479	166	.	11.0628	20.5733	16.6122	69	FALSE
chr5	24202640	24202872	Nanog_256_peak_10488	344	.	13.8698	39.1093	34.4117	127	FALSE
chr5	25447331	25447598	Nanog_256_peak_10502	206	.	12.9617	24.7849	20.6354	130	FALSE
chr5	25733665	25733797	Nanog_256_peak_10504	223	.	13.9394	26.5242	22.3011	86	FALSE
chr5	25770772	25770935	Nanog_256_peak_10505	142	.	10.62	18.054	14.2197	77	TRUE
chr5	27439239	27439362	Nanog_256_peak_10514	228	.	13.6941	27.069	22.824	65	TRUE
chr5	27515813	27516083	Nanog_256_peak_10515	219	.	12.5001	26.1882	21.9778	156	FALSE
chr5	27532338	27532597	Nanog_256_peak_10519	199	.	10.2535	24.1139	19.9896	89	TRUE
chr5	28391439	28391611	Nanog_256_peak_10525	193	.	11.5386	23.4406	19.3468	87	TRUE
chr5	28972789	28973034	Nanog_256_peak_10532	180	.	10.7069	22.0547	18.0224	80	TRUE
chr5	29689701	29690030	Nanog_256_peak_10546	217	.	11.6722	25.9885	21.7865	203	FALSE
chr5	29702425	29702676	Nanog_256_peak_10547	252	.	14.5182	29.5857	25.2371	154	FALSE
chr5	30115985	30116276	Nanog_256_peak_10549	151	.	10.8591	18.9915	15.1084	98	FALSE
chr5	30319922	30320165	Nanog_256_peak_10553	390	.	17.4153	43.9456	39.096	125	TRUE
chr5	30371943	30372238	Nanog_256_peak_10556	186	.	11.7278	22.6805	18.6186	62	TRUE
chr5	30535373	30535565	Nanog_256_peak_10558	221	.	12.5773	26.317	22.1011	71	FALSE
chr5	30547184	30547509	Nanog_256_peak_10559	323	.	11.4704	37.0029	32.3803	76	FALSE
chr5	30549186	30549464	Nanog_256_peak_10560	492	.	14.9297	54.4188	49.2867	108	TRUE
chr5	30715449	30715714	Nanog_256_peak_10561	211	.	11.6476	25.35	21.1745	82	TRUE
chr5	30843037	30843406	Nanog_256_peak_10562	304	.	14.6673	34.9479	30.4011	101	FALSE
chr5	30925697	30925913	Nanog_256_peak_10564	232	.	10.4777	27.4751	23.214	42	TRUE
chr5	31506915	31507050	Nanog_256_peak_10572	193	.	12.1691	23.4247	19.332	58	TRUE
chr5	32092966	32093153	Nanog_256_peak_10578	162	.	11.1107	20.2031	16.2606	101	FALSE
chr5	32651093	32651198	Nanog_256_peak_10585	149	.	10.9014	18.7921	14.9186	77	FALSE
chr5	33255372	33255632	Nanog_256_peak_10593	314	.	16.1438	36.0834	31.4957	157	FALSE
chr5	33611600	33611822	Nanog_256_peak_10599	248	.	11.3717	29.1488	24.8188	142	TRUE
chr5	33613834	33614113	Nanog_256_peak_10600	196	.	10.0421	23.7353	19.6268	53	TRUE
chr5	33965060	33965253	Nanog_256_peak_10602	260	.	14.659	30.4077	26.0266	50	FALSE
chr5	34964781	34964940	Nanog_256_peak_10610	186	.	12.3075	22.7265	18.6629	110	FALSE
chr5	35040699	35040953	Nanog_256_peak_10615	168	.	10.6423	20.872	16.8976	151	TRUE
chr5	35266717	35266936	Nanog_256_peak_10618	342	.	15.3774	38.9698	34.2775	161	TRUE
chr5	35293643	35293764	Nanog_256_peak_10620	207	.	13.027	24.8986	20.7438	42	TRUE
chr5	35333041	35333388	Nanog_256_peak_10622	202	.	12.0819	24.346	20.2135	140	TRUE
chr5	36512024	36512491	Nanog_256_peak_10638	499	.	12.055	55.0838	49.9341	236	FALSE
chr5	36691214	36691383	Nanog_256_peak_10642	242	.	13.2185	28.5937	24.2873	117	TRUE
chr5	36768545	36768729	Nanog_256_peak_10643	366	.	16.403	41.4667	36.6948	76	FALSE
chr5	36948771	36948988	Nanog_256_peak_10646	147	.	10.8074	18.6103	14.7467	159	FALSE
chr5	37307275	37307523	Nanog_256_peak_10651	253	.	14.2319	29.6852	25.3336	141	TRUE
chr5	37560162	37560247	Nanog_256_peak_10654	133	.	10.003	17.1206	13.3347	28	FALSE
chr5	37820682	37820969	Nanog_256_peak_10656	172	.	10.8887	21.2808	17.2855	218	FALSE
chr5	37827882	37828149	Nanog_256_peak_10657	214	.	12.8522	25.637	21.449	63	FALSE
chr5	38122149	38122329	Nanog_256_peak_10662	269	.	15.5521	31.3782	26.9617	89	TRUE
chr5	38372475	38372683	Nanog_256_peak_10667	175	.	11.9102	21.611	17.6	135	FALSE
chr5	39330722	39330940	Nanog_256_peak_10677	282	.	14.5182	32.6845	28.221	140	TRUE
chr5	41062846	41063065	Nanog_256_peak_10689	151	.	10.4117	19.0138	15.1296	137	FALSE
chr5	41346986	41347174	Nanog_256_peak_10691	917	.	35.6684	97.7452	91.7635	57	FALSE
chr5	41510208	41510414	Nanog_256_peak_10692	254	.	13.5815	29.8252	25.4689	80	TRUE
chr5	43457767	43457888	Nanog_256_peak_10702	160	.	10.3937	19.9463	16.016	64	FALSE
chr5	44547576	44547738	Nanog_256_peak_10720	134	.	10.22	17.2571	13.4643	44	FALSE
chr5	44780234	44780382	Nanog_256_peak_10724	135	.	10.1105	17.3136	13.518	33	FALSE
chr5	44994268	44994477	Nanog_256_peak_10726	291	.	14.2883	33.625	29.1263	75	FALSE
chr5	45815334	45815677	Nanog_256_peak_10736	385	.	17.9754	43.4082	38.5769	189	FALSE
chr5	46694328	46694472	Nanog_256_peak_10745	179	.	12.1367	22.022	17.9914	60	FALSE
chr5	46815715	46815886	Nanog_256_peak_10747	137	.	10.2482	17.5633	13.7546	70	TRUE
chr5	48920746	48921247	Nanog_256_peak_10754	187	.	11.1731	22.8322	18.7641	183	FALSE
chr5	49081111	49081279	Nanog_256_peak_10756	243	.	14.2993	28.6506	24.3413	71	FALSE
chr5	49546543	49546666	Nanog_256_peak_10760	318	.	16.7533	36.4547	31.8531	47	FALSE
chr5	50971951	50972076	Nanog_256_peak_10775	155	.	11.1003	19.4355	15.5314	62	FALSE
chr5	51624211	51624406	Nanog_256_peak_10784	304	.	11.113	34.9479	30.4011	99	FALSE
chr5	51833927	51834288	Nanog_256_peak_10785	158	.	10.2855	19.767	15.8466	67	FALSE
chr5	51998611	51998761	Nanog_256_peak_10787	265	.	14.5954	30.9041	26.5043	91	FALSE
chr5	52112992	52113169	Nanog_256_peak_10789	140	.	10.4184	17.8762	14.0513	79	FALSE
chr5	52844588	52844874	Nanog_256_peak_10797	346	.	15.6193	39.3885	34.682	132	FALSE
chr5	55600040	55600515	Nanog_256_peak_10811	290	.	13.8541	33.5546	29.0587	194	FALSE
chr5	56745826	56746064	Nanog_256_peak_10829	141	.	10.4765	17.9839	14.1535	151	FALSE
chr5	58007748	58008085	Nanog_256_peak_10844	252	.	13.8292	29.6168	25.2673	166	TRUE
chr5	58551609	58551749	Nanog_256_peak_10851	207	.	10.3579	24.8824	20.7285	48	FALSE
chr5	58898743	58899054	Nanog_256_peak_10854	464	.	19.0743	51.4533	46.4056	188	FALSE
chr5	59139597	59139697	Nanog_256_peak_10857	145	.	10.3206	18.423	14.5689	60	TRUE
chr5	59668581	59668736	Nanog_256_peak_10862	156	.	10.1585	19.5569	15.6464	125	TRUE
chr5	59909760	59910017	Nanog_256_peak_10867	270	.	14.5368	31.4279	27.0088	88	TRUE
chr5	60449240	60449443	Nanog_256_peak_10870	419	.	18.717	46.9237	41.9963	125	TRUE
chr5	61475738	61475983	Nanog_256_peak_10879	374	.	17.3138	42.287	37.4902	135	TRUE
chr5	61598365	61598736	Nanog_256_peak_10884	286	.	12.8248	33.0827	28.6041	251	TRUE
chr5	61611193	61611471	Nanog_256_peak_10887	271	.	10.9956	31.5528	27.1296	115	TRUE
chr5	61634777	61635007	Nanog_256_peak_10889	134	.	10.22	17.2571	13.4643	60	FALSE
chr5	61941519	61941617	Nanog_256_peak_10893	155	.	10.9337	19.4844	15.5773	27	FALSE
chr5	62285527	62285748	Nanog_256_peak_10896	176	.	10.1167	21.6129	17.6017	154	TRUE
chr5	62801242	62801432	Nanog_256_peak_10900	255	.	13.6631	29.9621	25.5997	65	TRUE
chr5	62802275	62802456	Nanog_256_peak_10901	187	.	11.1953	22.8691	18.7988	63	TRUE
chr5	62898176	62898360	Nanog_256_peak_10905	238	.	13.6436	28.1031	23.8165	89	TRUE
chr5	63510691	63510898	Nanog_256_peak_10912	257	.	10.5867	30.1117	25.7434	74	FALSE
chr5	63518770	63519124	Nanog_256_peak_10913	323	.	10.1119	36.9667	32.3456	194	FALSE
chr5	63643531	63643664	Nanog_256_peak_10914	287	.	15.6008	33.2229	28.7406	85	FALSE
chr5	65971557	65971737	Nanog_256_peak_10930	165	.	11.3075	20.5442	16.5852	88	FALSE
chr5	66400959	66401224	Nanog_256_peak_10933	258	.	12.7089	30.259	25.8841	168	FALSE
chr5	67859719	67859840	Nanog_256_peak_10947	323	.	17.0272	36.9218	32.3023	69	TRUE
chr5	68669584	68669805	Nanog_256_peak_10956	192	.	12.6382	23.3209	19.2333	120	FALSE
chr5	70509332	70509426	Nanog_256_peak_10976	140	.	10.2207	17.8539	14.0304	57	FALSE
chr5	71479939	71480124	Nanog_256_peak_10994	326	.	14.4104	37.2772	32.6455	82	FALSE
chr5	71480937	71481048	Nanog_256_peak_10995	313	.	13.6615	35.9417	31.3589	47	FALSE
chr5	72284599	72284803	Nanog_256_peak_11004	574	.	21.3038	62.8263	57.4953	109	TRUE
chr6	445612	445778	Nanog_256_peak_11015	298	.	16.6216	34.3797	29.8542	64	TRUE
chr6	1471943	1472227	Nanog_256_peak_11022	147	.	10.6565	18.6249	14.76	90	FALSE
chr6	1590970	1591115	Nanog_256_peak_11023	155	.	11.2643	19.4413	15.5365	56	TRUE
chr6	1828206	1828464	Nanog_256_peak_11026	270	.	14.9263	31.4627	27.043	174	FALSE
chr6	3406040	3406377	Nanog_256_peak_11041	161	.	10.7592	20.0624	16.126	269	FALSE
chr6	3599424	3599629	Nanog_256_peak_11042	164	.	10.64	20.3548	16.4035	158	FALSE
chr6	3850311	3850470	Nanog_256_peak_11053	319	.	18.0817	36.5314	31.9262	67	TRUE
chr6	4539002	4539274	Nanog_256_peak_11060	154	.	10.3337	19.3525	15.4521	94	TRUE
chr6	5228601	5228785	Nanog_256_peak_11071	168	.	11.6562	20.7858	16.815	127	FALSE
chr6	7251707	7251986	Nanog_256_peak_11088	196	.	11.054	23.7643	19.6544	131	FALSE
chr6	7732770	7732976	Nanog_256_peak_11092	257	.	13.7457	30.1007	25.7328	97	TRUE
chr6	7944199	7944297	Nanog_256_peak_11103	210	.	12.6223	25.2502	21.078	76	FALSE
chr6	8248846	8248965	Nanog_256_peak_11107	159	.	10.9206	19.8766	15.9502	73	FALSE
chr6	8974996	8975245	Nanog_256_peak_11111	149	.	10.2918	18.8126	14.9384	166	FALSE
chr6	9049125	9049444	Nanog_256_peak_11112	187	.	11.1953	22.8691	18.7988	51	TRUE
chr6	9060062	9060282	Nanog_256_peak_11113	208	.	11.4377	24.9955	20.8364	168	TRUE
chr6	9389671	9389874	Nanog_256_peak_11118	140	.	10.2469	17.8996	14.0734	99	FALSE
chr6	10780767	10780887	Nanog_256_peak_11128	181	.	12.4078	22.2217	18.1819	60	FALSE
chr6	10802306	10802692	Nanog_256_peak_11129	361	.	14.4641	40.9288	36.173	144	TRUE
chr6	10911650	10911904	Nanog_256_peak_11136	362	.	15.7268	41.0258	36.2657	59	TRUE
chr6	12329150	12329312	Nanog_256_peak_11147	188	.	11.2175	22.9062	18.8347	103	FALSE
chr6	12921069	12921366	Nanog_256_peak_11153	265	.	13.1302	30.9851	26.5831	184	FALSE
chr6	12927423	12927756	Nanog_256_peak_11154	285	.	14.303	32.9818	28.5074	224	TRUE
chr6	13352909	13353321	Nanog_256_peak_11159	192	.	10.1439	23.3452	19.2557	174	TRUE
chr6	14016823	14017182	Nanog_256_peak_11165	140	.	10.4184	17.8762	14.0513	59	FALSE
chr6	14022173	14022389	Nanog_256_peak_11166	174	.	12.0203	21.4691	17.465	69	FALSE
chr6	14493890	14494267	Nanog_256_peak_11170	472	.	19.5924	52.3498	47.2776	282	TRUE
chr6	15746217	15746501	Nanog_256_peak_11178	166	.	11.1151	20.6617	16.6972	119	TRUE
chr6	15986226	15986471	Nanog_256_peak_11179	167	.	10.5555	20.728	16.761	148	FALSE
chr6	16467565	16467684	Nanog_256_peak_11185	307	.	16.4396	35.2787	30.7189	60	TRUE
chr6	16723798	16724061	Nanog_256_peak_11189	321	.	16.1293	36.7353	32.1223	85	TRUE
chr6	17622249	17622433	Nanog_256_peak_11190	173	.	11.2457	21.3652	17.3662	80	FALSE
chr6	17837726	17837990	Nanog_256_peak_11194	402	.	17.6546	45.1098	40.2261	152	FALSE
chr6	18176062	18176182	Nanog_256_peak_11196	239	.	14.06	28.2396	23.947	59	TRUE
chr6	19015118	19015458	Nanog_256_peak_11204	235	.	12.7329	27.7793	23.5067	179	TRUE
chr6	20028749	20028860	Nanog_256_peak_11208	238	.	14.2831	28.0913	23.8052	56	FALSE
chr6	22026629	22027010	Nanog_256_peak_11213	216	.	11.5696	25.8139	21.6179	165	FALSE
chr6	23675116	23675227	Nanog_256_peak_11226	149	.	10.7714	18.832	14.9566	63	FALSE
chr6	24697909	24698207	Nanog_256_peak_11234	197	.	12.4322	23.8725	19.7576	186	TRUE
chr6	24765630	24765848	Nanog_256_peak_11236	167	.	10.577	20.7638	16.794	153	FALSE
chr6	24815194	24815474	Nanog_256_peak_11238	540	.	14.4446	59.282	54.0293	69	FALSE
chr6	25584658	25584816	Nanog_256_peak_11247	158	.	11.1058	19.7887	15.8666	75	TRUE
chr6	26701383	26701712	Nanog_256_peak_11255	371	.	15.8029	41.893	37.1061	212	FALSE
chr6	26863458	26863753	Nanog_256_peak_11256	219	.	11.4019	26.1278	21.9202	168	FALSE
chr6	26979017	26979344	Nanog_256_peak_11258	342	.	14.5586	38.9547	34.2631	181	TRUE
chr6	27090699	27090836	Nanog_256_peak_11260	188	.	12.4049	22.9003	18.829	91	TRUE
chr6	27571699	27571967	Nanog_256_peak_11265	204	.	12.2126	24.5642	20.423	164	TRUE
chr6	27742544	27742704	Nanog_256_peak_11267	175	.	11.9102	21.611	17.6	86	TRUE
chr6	27945923	27946076	Nanog_256_peak_11270	220	.	13.7908	26.2543	22.0413	55	TRUE
chr6	27985737	27986081	Nanog_256_peak_11271	153	.	10.266	19.2402	15.3446	180	FALSE
chr6	28815005	28815243	Nanog_256_peak_11280	212	.	12.7362	25.4417	21.2623	95	FALSE
chr6	29238495	29238695	Nanog_256_peak_11284	151	.	10.1552	19.0563	15.1694	156	FALSE
chr6	29403954	29404170	Nanog_256_peak_11286	210	.	12.9043	25.1897	21.0212	134	FALSE
chr6	31232975	31233177	Nanog_256_peak_11306	343	.	15.8452	39.0591	34.3641	102	FALSE
chr6	31256113	31256229	Nanog_256_peak_11308	187	.	12.3398	22.784	18.7179	51	TRUE
chr6	31664735	31664889	Nanog_256_peak_11312	222	.	13.902	26.456	22.2345	49	TRUE
chr6	31733087	31733373	Nanog_256_peak_11313	1027	.	32.2556	108.938	102.788	149	TRUE
chr6	32009358	32009526	Nanog_256_peak_11317	222	.	13.3381	26.46	22.2384	120	FALSE
chr6	32121301	32121543	Nanog_256_peak_11322	251	.	11.9186	29.5104	25.1648	148	TRUE
chr6	32274617	32274960	Nanog_256_peak_11329	379	.	17.1386	42.7271	37.9149	138	FALSE
chr6	32580023	32580303	Nanog_256_peak_11333	297	.	14.6941	34.3137	29.7901	74	FALSE
chr6	33538889	33539168	Nanog_256_peak_11344	307	.	14.462	35.282	30.7222	172	TRUE
chr6	34005522	34005669	Nanog_256_peak_11347	188	.	10.8846	22.9096	18.8379	97	TRUE
chr6	34686431	34686529	Nanog_256_peak_11353	232	.	13.9651	27.5369	23.2731	44	FALSE
chr6	35173653	35173810	Nanog_256_peak_11359	151	.	10.8591	18.9915	15.1084	28	FALSE
chr6	35733131	35733308	Nanog_256_peak_11366	169	.	11.7208	20.9055	16.9296	72	TRUE
chr6	37380675	37380820	Nanog_256_peak_11388	176	.	12.1235	21.6669	17.6534	51	TRUE
chr6	37422874	37423059	Nanog_256_peak_11390	228	.	13.6941	27.069	22.824	111	TRUE
chr6	37468843	37468992	Nanog_256_peak_11393	325	.	14.7695	37.2043	32.5746	68	FALSE
chr6	37524882	37525206	Nanog_256_peak_11395	182	.	11.172	22.2828	18.2399	173	TRUE
chr6	38358192	38358354	Nanog_256_peak_11408	424	.	19.4295	47.3689	42.4303	55	TRUE
chr6	38846754	38847014	Nanog_256_peak_11416	208	.	12.5104	25.0625	20.8999	95	TRUE
chr6	38983532	38983949	Nanog_256_peak_11417	475	.	16.2784	52.6422	47.5642	169	FALSE
chr6	39160391	39160630	Nanog_256_peak_11419	142	.	10.3799	18.133	14.2942	187	FALSE
chr6	39186065	39186359	Nanog_256_peak_11421	259	.	12.0033	30.2987	25.9224	98	FALSE
chr6	39199032	39199197	Nanog_256_peak_11422	150	.	10.8005	18.8847	15.0069	99	FALSE
chr6	39630941	39631045	Nanog_256_peak_11431	168	.	11.2212	20.8414	16.8684	51	FALSE
chr6	40351791	40351923	Nanog_256_peak_11440	350	.	12.1364	39.7631	35.0449	88	FALSE
chr6	40352469	40352710	Nanog_256_peak_11441	440	.	14.1806	49.0765	44.0974	141	TRUE
chr6	41696089	41696456	Nanog_256_peak_11456	147	.	10.448	18.6409	14.775	228	FALSE
chr6	41741518	41741721	Nanog_256_peak_11458	180	.	11.9328	22.066	18.0333	115	FALSE
chr6	42418192	42418352	Nanog_256_peak_11465	142	.	10.3263	18.0387	14.2052	74	FALSE
chr6	42440728	42440832	Nanog_256_peak_11466	168	.	11.6884	20.8454	16.8722	54	FALSE
chr6	42715517	42715682	Nanog_256_peak_11468	153	.	11.0086	19.2657	15.369	46	FALSE
chr6	43381819	43381937	Nanog_256_peak_11475	129	.	10.0023	16.6783	12.9167	45	FALSE
chr6	43625169	43625280	Nanog_256_peak_11476	148	.	10.7136	18.7277	14.8577	71	TRUE
chr6	45647533	45647746	Nanog_256_peak_11493	311	.	16.3403	35.7535	31.1781	89	TRUE
chr6	45905814	45905914	Nanog_256_peak_11495	144	.	10.2706	18.3377	14.4871	58	FALSE
chr6	46063893	46064027	Nanog_256_peak_11497	148	.	10.8699	18.7309	14.8603	88	FALSE
chr6	46294752	46294894	Nanog_256_peak_11502	154	.	11.039	19.3218	15.4226	56	FALSE
chr6	48024216	48024457	Nanog_256_peak_11524	233	.	13.6996	27.6253	23.3582	177	FALSE
chr6	48135436	48135523	Nanog_256_peak_11526	131	.	10.0454	16.9215	13.1458	65	FALSE
chr6	49093674	49094001	Nanog_256_peak_11531	353	.	14.3744	40.0463	35.3213	135	FALSE
chr6	49407740	49408030	Nanog_256_peak_11536	200	.	11.32	24.2126	20.0844	206	TRUE
chr6	50057986	50058421	Nanog_256_peak_11541	582	.	19.8461	63.5734	58.2241	63	TRUE
chr6	50203713	50204063	Nanog_256_peak_11543	276	.	12.9984	32.0669	27.6245	197	FALSE
chr6	50760266	50760495	Nanog_256_peak_11548	753	.	32.7864	81.0263	75.3437	66	FALSE
chr6	51132551	51132838	Nanog_256_peak_11553	141	.	10.2732	17.9456	14.1172	192	FALSE
chr6	51339942	51340177	Nanog_256_peak_11558	215	.	12.5853	25.7505	21.5574	155	FALSE
chr6	52699543	52699857	Nanog_256_peak_11571	150	.	10.605	18.9113	15.0322	194	FALSE
chr6	53110597	53110826	Nanog_256_peak_11574	225	.	13.1777	26.7434	22.5115	104	TRUE
chr6	53190328	53190560	Nanog_256_peak_11576	435	.	13.9212	48.5149	43.5485	70	FALSE
chr6	53428362	53428640	Nanog_256_peak_11580	334	.	16.5151	38.0741	33.4125	194	FALSE
chr6	54987160	54987688	Nanog_256_peak_11596	412	.	15.3137	46.1959	41.2864	411	TRUE
chr6	56079530	56079916	Nanog_256_peak_11610	230	.	12.4207	27.2544	23.0029	239	TRUE
chr6	56142251	56142438	Nanog_256_peak_11613	194	.	11.5859	23.5195	19.4217	80	FALSE
chr6	56399467	56399564	Nanog_256_peak_11619	133	.	10.1611	17.1432	13.3561	53	TRUE
chr6	57051030	57051232	Nanog_256_peak_11627	236	.	12.8072	27.904	23.6261	156	FALSE
chr6	58975017	58975134	Nanog_256_peak_11643	166	.	11.7185	20.6197	16.6569	64	FALSE
chr6	59408946	59409290	Nanog_256_peak_11646	183	.	11.5704	22.4167	18.3671	182	FALSE
chr6	60262140	60262341	Nanog_256_peak_11654	253	.	14.2639	29.7391	25.3863	64	FALSE
chr7	549730	550143	Nanog_256_peak_11660	386	.	15.8715	43.4955	38.6623	212	FALSE
chr7	1138285	1138514	Nanog_256_peak_11665	516	.	22.2064	56.8167	51.6211	59	TRUE
chr7	3336328	3336423	Nanog_256_peak_11673	227	.	14.5738	27.0437	22.7995	48	FALSE
chr7	4863160	4863306	Nanog_256_peak_11675	149	.	10.9837	18.8191	14.9447	89	FALSE
chr7	5989945	5990191	Nanog_256_peak_11685	141	.	10.5809	17.9398	14.1119	49	FALSE
chr7	8568086	8568340	Nanog_256_peak_11702	260	.	15.0174	30.4444	26.0622	192	FALSE
chr7	8882880	8883051	Nanog_256_peak_11704	144	.	10.4888	18.3256	14.4754	105	TRUE
chr7	9007869	9008244	Nanog_256_peak_11707	329	.	16.2137	37.5659	32.9241	205	FALSE
chr7	9665494	9665594	Nanog_256_peak_11714	160	.	11.5056	20.0032	16.0699	57	TRUE
chr7	10560937	10561046	Nanog_256_peak_11724	166	.	11.0628	20.5733	16.6122	34	FALSE
chr7	11241301	11241575	Nanog_256_peak_11731	147	.	10.448	18.6409	14.775	115	FALSE
chr7	12579751	12580321	Nanog_256_peak_11738	471	.	18.1717	52.2577	47.1884	480	TRUE
chr7	13097542	13097803	Nanog_256_peak_11743	383	.	14.5181	43.1988	38.3728	145	TRUE
chr7	14535614	14535718	Nanog_256_peak_11759	162	.	11.3439	20.2153	16.2713	57	FALSE
chr7	14576283	14576532	Nanog_256_peak_11760	268	.	14.4139	31.2215	26.8105	142	FALSE
chr7	14584952	14585136	Nanog_256_peak_11761	182	.	10.8301	22.2605	18.2186	132	TRUE
chr7	15308572	15308748	Nanog_256_peak_11771	404	.	18.2604	45.3863	40.4956	100	FALSE
chr7	16862649	16862846	Nanog_256_peak_11785	170	.	11.571	21.0062	17.0254	120	FALSE
chr7	16911218	16911327	Nanog_256_peak_11787	174	.	12.1457	21.4858	17.4809	66	FALSE
chr7	17125006	17125264	Nanog_256_peak_11792	195	.	12.2847	23.621	19.5184	96	TRUE
chr7	17148306	17148552	Nanog_256_peak_11793	265	.	14.5954	30.9041	26.5043	138	FALSE
chr7	17232746	17232977	Nanog_256_peak_11794	237	.	12.182	28.0837	23.7981	55	FALSE
chr7	17274649	17274792	Nanog_256_peak_11796	193	.	13.0397	23.4738	19.3783	96	FALSE
chr7	17908944	17909158	Nanog_256_peak_11799	213	.	12.0803	25.4868	21.3056	114	FALSE
chr7	18176649	18176915	Nanog_256_peak_11802	211	.	12.3216	25.3101	21.136	208	TRUE
chr7	18512736	18513190	Nanog_256_peak_11805	372	.	15.09	42.0817	37.2896	186	FALSE
chr7	18612216	18612426	Nanog_256_peak_11806	283	.	16.0685	32.8388	28.3691	148	TRUE
chr7	19562280	19562546	Nanog_256_peak_11810	166	.	10.1644	20.6067	16.6444	211	FALSE
chr7	19791760	19791929	Nanog_256_peak_11817	172	.	11.9187	21.2764	17.2815	109	FALSE
chr7	20144748	20144940	Nanog_256_peak_11823	161	.	11.0284	20.0615	16.1255	85	FALSE
chr7	20227759	20227951	Nanog_256_peak_11826	304	.	14.7213	35.0399	30.4895	83	FALSE
chr7	21764912	21765017	Nanog_256_peak_11843	139	.	10.1946	17.8084	13.9873	37	FALSE
chr7	22138741	22139109	Nanog_256_peak_11844	347	.	16.8962	39.4171	34.7096	218	TRUE
chr7	22318646	22318779	Nanog_256_peak_11846	192	.	11.1319	23.3242	19.2362	99	TRUE
chr7	22441355	22441494	Nanog_256_peak_11849	152	.	10.7124	19.0974	15.2088	64	TRUE
[truncated: 290 more rows]

## Sheet: Nanog 1k FitCUT&RUN
chrom	start	end	name	score	strand	signalValue	pValue	qValue	peak	contain nanog motif	1k-cell new peak
chr1	602268	602741	Nanog_1k_peak_6	158	.	10.3034	19.3021	15.8622	203	TRUE	TRUE
chr1	1028988	1029321	Nanog_1k_peak_13	437	.	21.1663	48.1192	43.7004	281	FALSE	FALSE
chr1	1133931	1134198	Nanog_1k_peak_16	217	.	12.4161	25.4679	21.7755	35	FALSE	FALSE
chr1	1327032	1327383	Nanog_1k_peak_19	151	.	10.7917	18.58	15.1725	220	FALSE	TRUE
chr1	1402575	1402781	Nanog_1k_peak_21	385	.	20.3031	42.764	38.5044	153	FALSE	FALSE
chr1	2308336	2308608	Nanog_1k_peak_38	150	.	10.5503	18.435	15.0338	87	TRUE	TRUE
chr1	2667955	2668169	Nanog_1k_peak_41	306	.	17.0978	34.6841	30.6707	81	TRUE	TRUE
chr1	3100014	3100156	Nanog_1k_peak_44	158	.	11.2121	19.3234	15.8827	69	FALSE	TRUE
chr1	3299897	3300029	Nanog_1k_peak_47	158	.	10.5771	19.2926	15.8529	47	FALSE	TRUE
chr1	3507008	3507262	Nanog_1k_peak_48	142	.	10.0967	17.6383	14.2734	144	TRUE	TRUE
chr1	3516258	3516552	Nanog_1k_peak_49	444	.	20.3537	48.935	44.4917	194	TRUE	FALSE
chr1	3647931	3648041	Nanog_1k_peak_51	155	.	10.391	18.979	15.5529	52	FALSE	TRUE
chr1	4210517	4210699	Nanog_1k_peak_53	423	.	21.1409	46.7095	42.3345	123	FALSE	FALSE
chr1	4724830	4725087	Nanog_1k_peak_62	185	.	10.0595	22.0696	18.5114	182	FALSE	FALSE
chr1	5013915	5014033	Nanog_1k_peak_70	285	.	16.7882	32.4975	28.5572	48	FALSE	FALSE
chr1	5111604	5111843	Nanog_1k_peak_73	308	.	13.0929	34.9101	30.8899	133	FALSE	FALSE
chr1	5274470	5274634	Nanog_1k_peak_79	249	.	13.2953	28.7223	24.9112	86	FALSE	TRUE
chr1	5279026	5279149	Nanog_1k_peak_80	217	.	12.0241	25.3929	21.7033	85	FALSE	TRUE
chr1	5436490	5436629	Nanog_1k_peak_81	257	.	15.1211	29.5867	25.7448	70	FALSE	TRUE
chr1	5533959	5534232	Nanog_1k_peak_85	348	.	14.9728	38.9782	34.8313	48	TRUE	TRUE
chr1	5966017	5966175	Nanog_1k_peak_90	524	.	22.3983	57.1429	52.4664	78	TRUE	FALSE
chr1	6164489	6164652	Nanog_1k_peak_95	225	.	13.2127	26.2467	22.526	91	FALSE	TRUE
chr1	7064949	7065481	Nanog_1k_peak_109	552	.	16.0796	60.0256	55.2669	143	FALSE	FALSE
chr1	7129014	7129259	Nanog_1k_peak_112	146	.	10.3186	18.0251	14.6429	159	FALSE	TRUE
chr1	7257866	7258116	Nanog_1k_peak_117	322	.	13.8816	36.3367	32.27	65	TRUE	TRUE
chr1	7514174	7514433	Nanog_1k_peak_120	179	.	11.8211	21.4508	17.9187	162	FALSE	TRUE
chr1	7698273	7698478	Nanog_1k_peak_125	168	.	10.6421	20.3584	16.8724	29	TRUE	TRUE
chr1	7836017	7836285	Nanog_1k_peak_128	200	.	11.998	23.6595	20.0359	174	FALSE	TRUE
chr1	7916780	7916970	Nanog_1k_peak_129	257	.	14.5391	29.6214	25.7783	130	FALSE	FALSE
chr1	8534357	8534635	Nanog_1k_peak_135	138	.	10.1724	17.1649	13.8224	67	FALSE	TRUE
chr1	8552691	8553065	Nanog_1k_peak_137	175	.	10.7544	21.0579	17.5417	316	FALSE	TRUE
chr1	8693944	8694178	Nanog_1k_peak_143	182	.	11.1717	21.7513	18.207	95	FALSE	TRUE
chr1	8736991	8737187	Nanog_1k_peak_144	165	.	10.7488	20.045	16.5725	92	FALSE	TRUE
chr1	8977933	8978042	Nanog_1k_peak_147	157	.	11.0926	19.1682	15.734	44	TRUE	TRUE
chr1	9289793	9290056	Nanog_1k_peak_158	294	.	11.9621	33.4536	29.4806	218	FALSE	TRUE
chr1	9721226	9721428	Nanog_1k_peak_172	212	.	10.7198	24.9398	21.2672	118	FALSE	TRUE
chr1	9735234	9735479	Nanog_1k_peak_173	152	.	10.4902	18.7134	15.2993	196	TRUE	TRUE
chr1	9984712	9985058	Nanog_1k_peak_177	182	.	12.0318	21.8309	18.2831	120	FALSE	TRUE
chr1	10107429	10107841	Nanog_1k_peak_181	645	.	17.8564	69.5741	64.5629	241	TRUE	FALSE
chr1	10473588	10473708	Nanog_1k_peak_192	154	.	10.5895	18.8844	15.4632	75	FALSE	TRUE
chr1	10495877	10496080	Nanog_1k_peak_193	268	.	14.0931	30.6833	26.8037	66	FALSE	TRUE
chr1	10582155	10582249	Nanog_1k_peak_196	192	.	12.5763	22.8393	19.2498	63	FALSE	TRUE
chr1	10598829	10599397	Nanog_1k_peak_199	604	.	10.9679	65.3622	60.4578	273	FALSE	FALSE
chr1	10848583	10848713	Nanog_1k_peak_205	136	.	10.0626	16.9543	13.6215	43	TRUE	TRUE
chr1	10967228	10967425	Nanog_1k_peak_209	221	.	13.011	25.9051	22.1964	120	FALSE	TRUE
chr1	10974381	10974546	Nanog_1k_peak_211	224	.	10.4056	26.1469	22.43	113	FALSE	TRUE
chr1	10975179	10975417	Nanog_1k_peak_212	249	.	11.1728	28.7815	24.9684	97	FALSE	TRUE
chr1	11495586	11495825	Nanog_1k_peak_221	208	.	11.1398	24.4901	20.8351	76	FALSE	FALSE
chr1	11614396	11614598	Nanog_1k_peak_227	189	.	12.1692	22.4812	18.9058	66	TRUE	TRUE
chr1	11625381	11625637	Nanog_1k_peak_228	151	.	10.3927	18.5463	15.1402	140	TRUE	TRUE
chr1	11878229	11878706	Nanog_1k_peak_232	232	.	11.8861	26.9595	23.2125	130	FALSE	FALSE
chr1	12348045	12348334	Nanog_1k_peak_240	231	.	13.8926	26.9031	23.1586	150	FALSE	TRUE
chr1	12513420	12513713	Nanog_1k_peak_243	204	.	12.809	24.051	20.4122	249	FALSE	TRUE
chr1	12971362	12971498	Nanog_1k_peak_248	148	.	10.7284	18.2776	14.8836	76	FALSE	TRUE
chr1	13425608	13425749	Nanog_1k_peak_263	192	.	12.6915	22.7921	19.2042	97	TRUE	TRUE
chr1	13533664	13533817	Nanog_1k_peak_264	191	.	12.2895	22.6944	19.1104	53	FALSE	TRUE
chr1	13597724	13597938	Nanog_1k_peak_265	1013	.	37.7173	107.162	101.378	59	FALSE	FALSE
chr1	13602991	13603147	Nanog_1k_peak_266	467	.	20.8175	51.2622	46.7479	90	TRUE	FALSE
chr1	13695726	13695982	Nanog_1k_peak_270	268	.	14.1484	30.776	26.8934	111	FALSE	TRUE
chr1	13825037	13825488	Nanog_1k_peak_272	238	.	12.9941	27.6089	23.8379	184	FALSE	TRUE
chr1	13966914	13967133	Nanog_1k_peak_273	229	.	13.4813	26.7043	22.9666	96	FALSE	TRUE
chr1	14339643	14339817	Nanog_1k_peak_280	141	.	10.2363	17.5417	14.1814	94	FALSE	TRUE
chr1	14498160	14498340	Nanog_1k_peak_285	214	.	12.8615	25.1167	21.4376	113	TRUE	TRUE
chr1	14507418	14507694	Nanog_1k_peak_286	398	.	13.5774	44.197	39.8956	132	FALSE	TRUE
chr1	14509810	14510117	Nanog_1k_peak_287	443	.	14.7629	48.8289	44.3893	161	FALSE	FALSE
chr1	15330741	15330968	Nanog_1k_peak_294	251	.	13.7952	28.9505	25.1314	118	FALSE	FALSE
chr1	15517857	15518218	Nanog_1k_peak_295	674	.	23.8237	72.5834	67.4946	280	TRUE	FALSE
chr1	15565749	15565897	Nanog_1k_peak_297	165	.	11.4043	20.0088	16.5374	83	FALSE	TRUE
chr1	15911361	15911513	Nanog_1k_peak_304	170	.	10.4463	20.547	17.053	101	FALSE	TRUE
chr1	15921150	15921501	Nanog_1k_peak_307	438	.	13.4707	48.2377	43.8159	202	TRUE	TRUE
chr1	15927133	15927418	Nanog_1k_peak_309	393	.	14.3804	43.6586	39.3713	162	FALSE	FALSE
chr1	16400103	16400284	Nanog_1k_peak_319	166	.	11.0471	20.0936	16.6192	96	TRUE	TRUE
chr1	16507816	16507985	Nanog_1k_peak_321	244	.	14.0748	28.265	24.471	88	FALSE	TRUE
chr1	16563763	16564121	Nanog_1k_peak_322	635	.	16.0119	68.4988	63.5132	229	FALSE	TRUE
chr1	16565156	16565449	Nanog_1k_peak_323	445	.	12.8836	48.9947	44.5498	130	TRUE	TRUE
chr1	16594543	16594859	Nanog_1k_peak_325	163	.	10.8942	19.8314	16.3682	269	FALSE	TRUE
chr1	16721016	16721322	Nanog_1k_peak_326	242	.	14.2542	28.0406	24.2546	105	FALSE	TRUE
chr1	16761075	16761397	Nanog_1k_peak_329	239	.	11.2916	27.7633	23.9873	235	FALSE	TRUE
chr1	17209596	17209737	Nanog_1k_peak_331	201	.	13.1386	23.7306	20.1042	61	FALSE	FALSE
chr1	17355454	17355647	Nanog_1k_peak_334	185	.	11.6905	22.1153	18.5542	52	TRUE	TRUE
chr1	17377162	17377453	Nanog_1k_peak_335	186	.	11.4523	22.2193	18.6542	128	FALSE	TRUE
chr1	17857275	17857554	Nanog_1k_peak_344	494	.	20.5843	54.0532	49.4589	110	TRUE	FALSE
chr1	17879260	17879454	Nanog_1k_peak_345	231	.	14.3195	26.8551	23.1122	136	FALSE	TRUE
chr1	18029672	18029841	Nanog_1k_peak_350	213	.	13.3664	25.054	21.3769	98	TRUE	TRUE
chr1	18061110	18061192	Nanog_1k_peak_351	148	.	10.7284	18.2776	14.8836	14	FALSE	TRUE
chr1	18269411	18269700	Nanog_1k_peak_357	219	.	13.8657	25.6526	21.9539	105	FALSE	TRUE
chr1	18383488	18383876	Nanog_1k_peak_360	167	.	10.8425	20.2022	16.7233	325	FALSE	TRUE
chr1	18416197	18416351	Nanog_1k_peak_361	152	.	10.4902	18.7134	15.2993	85	TRUE	TRUE
chr1	18710689	18711114	Nanog_1k_peak_372	342	.	15.4711	38.4173	34.2865	156	FALSE	FALSE
chr1	18950500	18950583	Nanog_1k_peak_375	149	.	10.2971	18.3829	14.9844	46	FALSE	TRUE
chr1	18950709	18950798	Nanog_1k_peak_376	418	.	20.4999	46.2609	41.8998	51	TRUE	TRUE
chr1	19022974	19023331	Nanog_1k_peak_378	158	.	11.0178	19.2827	15.844	237	FALSE	TRUE
chr1	19649920	19650370	Nanog_1k_peak_387	1014	.	19.9331	107.217	101.433	78	FALSE	FALSE
chr1	19671860	19672209	Nanog_1k_peak_390	411	.	12.8529	45.4393	41.1013	297	TRUE	TRUE
chr1	19900353	19900631	Nanog_1k_peak_397	212	.	12.7753	24.9699	21.2963	156	FALSE	TRUE
chr1	20422158	20422264	Nanog_1k_peak_402	144	.	10.5166	17.8439	14.4699	47	TRUE	TRUE
chr1	20818393	20818707	Nanog_1k_peak_410	366	.	14.0685	40.9008	36.6954	184	TRUE	TRUE
chr1	20928745	20928951	Nanog_1k_peak_413	198	.	12.7299	23.4879	19.8714	95	TRUE	TRUE
chr1	21209701	21210082	Nanog_1k_peak_415	247	.	13.2195	28.5955	24.7889	90	FALSE	FALSE
chr1	21291687	21292018	Nanog_1k_peak_417	616	.	19.227	66.6042	61.667	167	FALSE	FALSE
chr1	21296945	21297377	Nanog_1k_peak_419	574	.	16.3671	62.2341	57.4179	243	TRUE	FALSE
chr1	21730055	21730297	Nanog_1k_peak_425	289	.	12.7392	32.9282	28.9743	102	FALSE	TRUE
chr1	21735143	21735554	Nanog_1k_peak_427	419	.	13.2459	46.3178	41.9556	211	FALSE	TRUE
chr1	23408581	23408772	Nanog_1k_peak_452	256	.	14.474	29.5101	25.671	53	FALSE	TRUE
chr1	23489793	23489973	Nanog_1k_peak_455	291	.	15.8716	33.0754	29.1153	133	TRUE	FALSE
chr1	23998739	23999006	Nanog_1k_peak_464	188	.	11.598	22.4629	18.8885	150	TRUE	TRUE
chr1	24233351	24233497	Nanog_1k_peak_469	382	.	19.0985	42.4635	38.2114	100	TRUE	FALSE
chr1	24563837	24564036	Nanog_1k_peak_472	142	.	10.3993	17.6092	14.2458	154	TRUE	TRUE
chr1	24873279	24873705	Nanog_1k_peak_483	1112	.	20.0296	117.191	111.27	62	FALSE	FALSE
chr1	24901922	24902407	Nanog_1k_peak_484	478	.	17.3556	52.3549	47.8097	192	FALSE	TRUE
chr1	24938662	24939061	Nanog_1k_peak_488	530	.	13.5447	57.7452	53.0505	206	TRUE	FALSE
chr1	24989888	24990026	Nanog_1k_peak_491	172	.	11.4487	20.7909	17.2858	67	TRUE	TRUE
chr1	25378767	25378947	Nanog_1k_peak_495	183	.	11.5356	21.853	18.3043	62	TRUE	TRUE
chr1	25461614	25461753	Nanog_1k_peak_496	170	.	11.5456	20.5822	17.0864	97	FALSE	TRUE
chr1	25565946	25566081	Nanog_1k_peak_499	327	.	18.4367	36.8384	32.756	48	FALSE	FALSE
chr1	25687575	25687778	Nanog_1k_peak_503	195	.	11.979	23.1032	19.5023	112	FALSE	FALSE
chr1	25801412	25801697	Nanog_1k_peak_506	493	.	20.5474	53.99	49.3976	140	FALSE	FALSE
chr1	26071547	26071813	Nanog_1k_peak_510	325	.	14.4277	36.608	32.5327	85	FALSE	FALSE
chr1	26294227	26294467	Nanog_1k_peak_515	274	.	10.301	31.3428	27.4404	108	TRUE	TRUE
chr1	26357986	26358319	Nanog_1k_peak_519	186	.	11.4764	22.2594	18.6928	143	FALSE	TRUE
chr1	26394280	26394665	Nanog_1k_peak_521	422	.	14.7888	46.6589	42.2865	290	TRUE	FALSE
chr1	26617365	26617844	Nanog_1k_peak_527	660	.	17.0826	71.0782	66.0261	168	TRUE	FALSE
chr1	26642683	26643019	Nanog_1k_peak_529	304	.	14.386	34.4678	30.4614	144	TRUE	FALSE
chr1	26663694	26663858	Nanog_1k_peak_530	172	.	10.2369	20.7277	17.2255	87	TRUE	TRUE
chr1	26673348	26673878	Nanog_1k_peak_531	558	.	14.668	60.579	55.8061	161	FALSE	FALSE
chr1	26840701	26841010	Nanog_1k_peak_536	229	.	12.4634	26.7208	22.9825	67	FALSE	TRUE
chr1	26851261	26851481	Nanog_1k_peak_537	410	.	17.8022	45.3628	41.0278	100	FALSE	FALSE
chr1	26882374	26882619	Nanog_1k_peak_539	176	.	10.1721	21.1586	17.6385	145	TRUE	TRUE
chr1	26915036	26915347	Nanog_1k_peak_544	519	.	12.3494	56.6092	51.9474	202	TRUE	FALSE
chr1	27135866	27136268	Nanog_1k_peak_553	365	.	11.4253	40.7987	36.5965	301	TRUE	FALSE
chr1	27541949	27542065	Nanog_1k_peak_559	425	.	21.9014	46.8939	42.513	58	FALSE	FALSE
chr1	27561205	27561518	Nanog_1k_peak_561	213	.	12.8039	25.0186	21.343	196	TRUE	FALSE
chr1	28249833	28250159	Nanog_1k_peak_566	181	.	11.9708	21.7204	18.1772	111	FALSE	TRUE
chr1	28364875	28365083	Nanog_1k_peak_567	319	.	16.118	36.04	31.9831	167	FALSE	TRUE
chr1	28760927	28761201	Nanog_1k_peak_574	138	.	10.0299	17.1687	13.8257	94	FALSE	TRUE
chr1	28904616	28904911	Nanog_1k_peak_578	152	.	10.6567	18.6253	15.2155	77	TRUE	TRUE
chr1	29139099	29139347	Nanog_1k_peak_581	247	.	13.5721	28.5763	24.7701	40	FALSE	TRUE
chr1	29226820	29227006	Nanog_1k_peak_583	291	.	15.8716	33.0754	29.1153	112	FALSE	FALSE
chr1	29463127	29463358	Nanog_1k_peak_585	323	.	14.3378	36.4504	32.3802	103	TRUE	FALSE
chr1	29855198	29855492	Nanog_1k_peak_594	688	.	18.3428	73.984	68.8584	193	FALSE	FALSE
chr1	29877755	29878027	Nanog_1k_peak_599	175	.	10.4616	21.102	17.5838	113	FALSE	TRUE
chr1	29880605	29880853	Nanog_1k_peak_600	171	.	10.5267	20.6804	17.1804	184	FALSE	TRUE
chr1	29893987	29894454	Nanog_1k_peak_601	381	.	15.238	42.3515	38.1027	132	FALSE	FALSE
chr1	30059226	30059750	Nanog_1k_peak_604	223	.	11.7276	26.0826	22.3682	153	FALSE	TRUE
chr1	30067427	30067672	Nanog_1k_peak_605	146	.	10.2934	17.981	14.6007	91	TRUE	TRUE
chr1	30075089	30075398	Nanog_1k_peak_606	767	.	28.1916	82.0564	76.7455	161	TRUE	FALSE
chr1	30080612	30080822	Nanog_1k_peak_607	138	.	10.1724	17.1649	13.8224	153	FALSE	TRUE
chr1	30231098	30231181	Nanog_1k_peak_609	202	.	13.2049	23.8746	20.2425	60	FALSE	TRUE
chr1	30359895	30360284	Nanog_1k_peak_613	217	.	10.981	25.3973	21.7076	337	TRUE	TRUE
chr1	30723246	30723429	Nanog_1k_peak_617	187	.	10.56	22.3635	18.7929	112	FALSE	TRUE
chr1	30757177	30757365	Nanog_1k_peak_619	216	.	13.5397	25.3726	21.6836	133	FALSE	TRUE
chr1	31105854	31106375	Nanog_1k_peak_627	169	.	10.3868	20.4484	16.9584	416	FALSE	TRUE
chr1	31421387	31421627	Nanog_1k_peak_630	258	.	13.1177	29.6769	25.8317	91	FALSE	FALSE
chr1	31534002	31534205	Nanog_1k_peak_636	214	.	11.1813	25.15	21.4696	82	TRUE	FALSE
chr1	31544623	31544831	Nanog_1k_peak_638	492	.	19.0473	53.8196	49.2331	87	TRUE	FALSE
chr1	31724979	31725151	Nanog_1k_peak_643	283	.	16.0557	32.2739	28.341	97	TRUE	FALSE
chr1	31762551	31762759	Nanog_1k_peak_645	319	.	17.2238	36.0221	31.9656	175	FALSE	FALSE
chr1	31771386	31771677	Nanog_1k_peak_646	149	.	10.7593	18.3421	14.9451	63	FALSE	TRUE
chr1	32117802	32118052	Nanog_1k_peak_649	268	.	14.8314	30.7009	26.8207	119	TRUE	TRUE
chr1	33158332	33158575	Nanog_1k_peak_660	148	.	10.6976	18.2137	14.8227	164	TRUE	TRUE
chr1	33596006	33596173	Nanog_1k_peak_667	147	.	10.6366	18.088	14.7028	85	FALSE	TRUE
chr1	33647468	33647642	Nanog_1k_peak_668	369	.	17.9565	41.208	36.9928	116	FALSE	FALSE
chr1	34010167	34010368	Nanog_1k_peak_673	388	.	19.4949	43.1496	38.8773	63	FALSE	TRUE
chr1	34111377	34111654	Nanog_1k_peak_678	212	.	12.4155	24.9035	21.2327	193	FALSE	TRUE
chr1	34137991	34138218	Nanog_1k_peak_679	260	.	15.2759	29.8696	26.0168	174	TRUE	FALSE
chr1	34350672	34350929	Nanog_1k_peak_685	178	.	10.3306	21.4248	17.8943	123	FALSE	FALSE
chr1	34355807	34356308	Nanog_1k_peak_686	240	.	12.0186	27.8029	24.0254	95	FALSE	FALSE
chr1	35494748	35494897	Nanog_1k_peak_690	203	.	10.5064	23.9817	20.3454	75	FALSE	TRUE
chr1	35511427	35511669	Nanog_1k_peak_691	158	.	10.8199	19.2847	15.8459	41	FALSE	TRUE
chr1	35638974	35639298	Nanog_1k_peak_693	201	.	12.3579	23.7456	20.1185	126	FALSE	TRUE
chr1	35791769	35792164	Nanog_1k_peak_700	340	.	10.8801	38.2247	34.0996	299	TRUE	TRUE
chr1	36150845	36150961	Nanog_1k_peak_705	143	.	10.316	17.6873	14.3203	28	TRUE	TRUE
chr1	36379727	36379914	Nanog_1k_peak_708	171	.	11.0842	20.6094	17.1124	60	TRUE	TRUE
chr1	36442890	36443383	Nanog_1k_peak_711	660	.	17.8187	71.1397	66.0863	300	FALSE	FALSE
chr1	36674503	36674722	Nanog_1k_peak_719	171	.	11.8175	20.6826	17.1826	97	TRUE	TRUE
chr1	37542918	37543201	Nanog_1k_peak_738	234	.	14.2957	27.1808	23.4258	191	FALSE	TRUE
chr1	37561823	37562047	Nanog_1k_peak_739	134	.	10.042	16.7609	13.4382	96	TRUE	TRUE
chr1	37868498	37868682	Nanog_1k_peak_741	181	.	11.4596	21.7248	18.1814	121	FALSE	TRUE
chr1	37869428	37869617	Nanog_1k_peak_742	233	.	13.407	27.1299	23.3766	124	TRUE	TRUE
chr1	37896103	37896380	Nanog_1k_peak_743	156	.	10.1977	19.1268	15.6945	205	TRUE	TRUE
chr1	38173699	38173918	Nanog_1k_peak_749	548	.	14.2774	59.6106	54.8623	127	TRUE	FALSE
chr1	38182644	38182915	Nanog_1k_peak_753	262	.	10.0194	30.1383	26.2769	131	FALSE	TRUE
chr1	38361114	38361267	Nanog_1k_peak_762	303	.	16.2899	34.3993	30.3952	94	FALSE	TRUE
chr1	38379140	38379364	Nanog_1k_peak_764	363	.	17.1266	40.5176	36.3237	140	FALSE	TRUE
chr1	38550581	38551075	Nanog_1k_peak_767	298	.	12.1724	33.8571	29.8703	163	FALSE	TRUE
chr1	38698638	38698853	Nanog_1k_peak_768	232	.	12.2647	26.9916	23.2433	85	FALSE	TRUE
chr1	38708498	38709085	Nanog_1k_peak_769	526	.	16.2929	57.3525	52.6706	334	TRUE	FALSE
chr1	38758319	38758497	Nanog_1k_peak_770	283	.	12.3866	32.2881	28.3549	54	FALSE	TRUE
chr1	38815456	38815644	Nanog_1k_peak_774	182	.	10.8796	21.7969	18.2505	106	FALSE	TRUE
chr1	38816718	38816870	Nanog_1k_peak_775	237	.	12.969	27.5669	23.7977	79	FALSE	TRUE
chr1	38977879	38978132	Nanog_1k_peak_780	209	.	12.2373	24.6054	20.9459	179	FALSE	TRUE
chr1	38984781	38984969	Nanog_1k_peak_781	241	.	14.4544	27.9083	24.1274	90	FALSE	TRUE
chr1	39062439	39062770	Nanog_1k_peak_782	236	.	13.257	27.4539	23.6888	194	FALSE	TRUE
chr1	39184768	39184990	Nanog_1k_peak_788	166	.	11.4662	20.1275	16.6519	112	TRUE	TRUE
chr1	39433416	39433671	Nanog_1k_peak_797	331	.	11.6041	37.2925	33.1945	66	FALSE	TRUE
chr1	39761737	39761981	Nanog_1k_peak_804	231	.	12.2002	26.8829	23.1391	99	FALSE	TRUE
chr1	39863735	39863899	Nanog_1k_peak_806	297	.	13.9815	33.7741	29.7897	68	FALSE	TRUE
chr1	39865568	39865700	Nanog_1k_peak_807	189	.	10.3	22.4827	18.9073	59	FALSE	TRUE
chr1	39872672	39873130	Nanog_1k_peak_808	345	.	13.6217	38.6431	34.5058	135	TRUE	FALSE
chr1	39888494	39888869	Nanog_1k_peak_809	163	.	10.8942	19.8314	16.3682	73	FALSE	TRUE
chr1	39930130	39930358	Nanog_1k_peak_810	187	.	10.8372	22.2722	18.7052	67	FALSE	TRUE
chr1	40120545	40120924	Nanog_1k_peak_816	317	.	15.1599	35.7851	31.7373	61	FALSE	FALSE
chr1	40131606	40131847	Nanog_1k_peak_817	578	.	19.3625	62.6585	57.8304	153	TRUE	FALSE
chr1	40227396	40227506	Nanog_1k_peak_819	171	.	11.3934	20.6942	17.1933	49	FALSE	TRUE
chr1	40238578	40238760	Nanog_1k_peak_820	149	.	10.2499	18.3026	14.9076	63	FALSE	TRUE
chr1	40481313	40481637	Nanog_1k_peak_823	355	.	16.6488	39.7098	35.5401	273	FALSE	FALSE
chr1	40518128	40518322	Nanog_1k_peak_824	254	.	14.3137	29.2369	25.408	52	TRUE	FALSE
chr1	40647063	40647495	Nanog_1k_peak_826	315	.	15.0252	35.5566	31.5155	407	FALSE	FALSE
chr1	40912747	40913165	Nanog_1k_peak_834	407	.	10.8364	45.0866	40.7588	285	TRUE	FALSE
chr1	40966803	40967016	Nanog_1k_peak_838	249	.	14.3676	28.7684	24.9558	152	FALSE	FALSE
chr1	41099906	41100062	Nanog_1k_peak_841	154	.	10.0129	18.8207	15.402	47	FALSE	TRUE
chr1	41131029	41131208	Nanog_1k_peak_847	171	.	10.7962	20.6144	17.1171	36	FALSE	TRUE
chr1	41827144	41827447	Nanog_1k_peak_867	243	.	12.925	28.1018	24.3138	186	FALSE	TRUE
chr1	41852417	41852721	Nanog_1k_peak_868	216	.	13.0078	25.3664	21.6778	109	FALSE	TRUE
chr1	42531036	42531375	Nanog_1k_peak_880	228	.	11.308	26.5697	22.8369	198	TRUE	TRUE
chr1	43041086	43041479	Nanog_1k_peak_889	168	.	10.5989	20.2866	16.8041	170	TRUE	TRUE
chr1	43222872	43222997	Nanog_1k_peak_890	148	.	10.446	18.2498	14.8571	48	TRUE	TRUE
chr1	43298211	43298524	Nanog_1k_peak_891	209	.	12.8817	24.646	20.9846	221	TRUE	TRUE
chr1	43723337	43723466	Nanog_1k_peak_900	198	.	10.2285	23.4944	19.8776	41	FALSE	TRUE
chr1	43835947	43836130	Nanog_1k_peak_904	292	.	15.5857	33.1973	29.2324	68	TRUE	FALSE
chr1	43847729	43847942	Nanog_1k_peak_905	179	.	11.6014	21.4913	17.958	103	TRUE	TRUE
chr1	44012858	44013344	Nanog_1k_peak_910	960	.	24.0122	101.727	96.03	181	TRUE	FALSE
chr1	44037050	44037263	Nanog_1k_peak_911	215	.	12.9196	25.2158	21.5326	58	TRUE	TRUE
chr1	44050939	44051359	Nanog_1k_peak_912	512	.	11.6332	55.8507	51.2088	220	TRUE	TRUE
chr1	44396532	44396635	Nanog_1k_peak_916	144	.	10.528	17.8186	14.446	58	FALSE	TRUE
chr1	44523396	44523524	Nanog_1k_peak_917	214	.	13.4007	25.1167	21.4377	72	FALSE	TRUE
chr1	44581975	44582102	Nanog_1k_peak_918	317	.	16.7382	35.7897	31.7417	56	FALSE	TRUE
chr1	44702852	44703085	Nanog_1k_peak_919	194	.	10.97	23.0529	19.4543	68	FALSE	TRUE
chr1	44704120	44704502	Nanog_1k_peak_920	194	.	10.97	23.0529	19.4543	42	FALSE	TRUE
chr1	44838628	44838713	Nanog_1k_peak_923	187	.	10.5064	22.2731	18.7059	37	FALSE	TRUE
chr1	44839095	44839334	Nanog_1k_peak_924	387	.	16.8959	43.0546	38.7852	52	FALSE	TRUE
chr1	45003046	45003353	Nanog_1k_peak_929	306	.	12.2689	34.7022	30.6883	198	FALSE	FALSE
chr1	45708339	45708523	Nanog_1k_peak_938	258	.	11.0148	29.7228	25.8763	62	TRUE	TRUE
chr1	45710633	45710850	Nanog_1k_peak_939	231	.	10.7864	26.8481	23.1054	138	TRUE	TRUE
chr1	45716238	45716677	Nanog_1k_peak_940	457	.	18.8162	50.2112	45.7295	224	FALSE	TRUE
chr1	45852869	45853219	Nanog_1k_peak_946	201	.	12.3579	23.7456	20.1185	148	FALSE	TRUE
chr1	45920610	45920757	Nanog_1k_peak_947	188	.	11.5491	22.381	18.8095	60	FALSE	TRUE
chr1	46115056	46115389	Nanog_1k_peak_952	597	.	15.3714	64.5893	59.7075	169	TRUE	FALSE
chr1	46192666	46192853	Nanog_1k_peak_954	282	.	15.002	32.2105	28.2796	94	FALSE	TRUE
chr1	46223382	46223733	Nanog_1k_peak_957	184	.	10.682	22.0131	18.4574	51	TRUE	TRUE
chr1	46389634	46389846	Nanog_1k_peak_965	188	.	12.1099	22.3766	18.8052	110	TRUE	TRUE
chr1	46819002	46819238	Nanog_1k_peak_973	136	.	10.0626	16.9543	13.6215	164	FALSE	TRUE
chr1	46832653	46832962	Nanog_1k_peak_975	482	.	13.5865	52.8048	48.2475	156	FALSE	FALSE
chr1	46924113	46924237	Nanog_1k_peak_978	167	.	11.3696	20.2618	16.7803	83	FALSE	TRUE
chr1	47122822	47123010	Nanog_1k_peak_981	148	.	10.6976	18.2137	14.8227	95	TRUE	FALSE
chr1	47176689	47176848	Nanog_1k_peak_982	325	.	10.7362	36.6284	32.5524	57	TRUE	TRUE
chr1	47177140	47177491	Nanog_1k_peak_983	320	.	10.0288	36.1537	32.093	209	TRUE	FALSE
chr1	47195799	47196007	Nanog_1k_peak_986	141	.	10.2363	17.5417	14.1814	60	FALSE	TRUE
chr1	47539148	47539342	Nanog_1k_peak_990	194	.	11.9268	23.0151	19.4183	108	FALSE	TRUE
chr1	47824545	47824780	Nanog_1k_peak_992	228	.	12.7097	26.5382	22.8066	180	TRUE	FALSE
chr1	47844494	47844875	Nanog_1k_peak_995	204	.	12.5853	24.1346	20.4927	184	FALSE	TRUE
chr1	48467316	48467946	Nanog_1k_peak_999	322	.	11.1624	36.3289	32.2625	146	FALSE	TRUE
chr1	48495607	48495826	Nanog_1k_peak_1003	152	.	10.8506	18.6935	15.2801	142	FALSE	TRUE
chr1	48898617	48898850	Nanog_1k_peak_1010	226	.	11.5436	26.3721	22.6467	115	FALSE	FALSE
chr1	48913138	48913309	Nanog_1k_peak_1012	185	.	12.3415	22.0909	18.5316	101	FALSE	TRUE
chr1	48939871	48940135	Nanog_1k_peak_1013	352	.	16.8769	39.3846	35.2254	110	FALSE	FALSE
chr1	49289037	49289425	Nanog_1k_peak_1017	155	.	10.1354	19.0234	15.5956	121	TRUE	FALSE
chr1	49303143	49303258	Nanog_1k_peak_1018	148	.	10.5906	18.1975	14.8074	67	TRUE	TRUE
chr1	49352585	49352957	Nanog_1k_peak_1020	397	.	16.1836	44.0532	39.7553	172	FALSE	FALSE
chr1	49434828	49434976	Nanog_1k_peak_1023	351	.	18.7117	39.2616	35.1063	76	FALSE	TRUE
chr1	49591626	49591861	Nanog_1k_peak_1026	451	.	20.7789	49.6573	45.191	110	TRUE	FALSE
chr1	49650893	49651030	Nanog_1k_peak_1027	348	.	18.8443	38.9583	34.8119	54	FALSE	TRUE
chr1	49932066	49932192	Nanog_1k_peak_1031	136	.	10.0978	16.9497	13.6173	44	FALSE	TRUE
chr1	50528024	50528119	Nanog_1k_peak_1035	135	.	10.0086	16.8516	13.5247	41	FALSE	TRUE
chr1	50542916	50543100	Nanog_1k_peak_1036	213	.	13.3664	25.054	21.3769	128	TRUE	FALSE
chr1	50882450	50882645	Nanog_1k_peak_1040	313	.	11.6006	35.3341	31.3002	92	FALSE	TRUE
chr1	50884383	50884591	Nanog_1k_peak_1041	333	.	11.6633	37.42	33.3185	112	FALSE	TRUE
chr1	50894684	50894977	Nanog_1k_peak_1044	209	.	12.5786	24.6363	20.9753	104	FALSE	TRUE
chr1	50921062	50921307	Nanog_1k_peak_1045	596	.	10.4218	64.4907	59.6129	155	TRUE	TRUE
chr1	50922295	50922723	Nanog_1k_peak_1046	848	.	12.9776	90.2891	84.811	226	FALSE	FALSE
chr1	50923631	50923946	Nanog_1k_peak_1047	757	.	12.074	81.013	75.7249	187	TRUE	FALSE
chr1	51188551	51188810	Nanog_1k_peak_1053	166	.	10.8189	20.1626	16.6854	122	FALSE	TRUE
chr1	51463440	51463605	Nanog_1k_peak_1056	220	.	12.2288	25.735	22.0327	89	FALSE	FALSE
chr1	51473741	51473841	Nanog_1k_peak_1059	198	.	11.5504	23.4602	19.8448	60	TRUE	TRUE
chr1	51734490	51734660	Nanog_1k_peak_1069	179	.	11.2862	21.4332	17.902	118	FALSE	FALSE
chr1	51801863	51802120	Nanog_1k_peak_1071	191	.	12.2895	22.6944	19.1104	183	TRUE	TRUE
chr1	51829168	51829463	Nanog_1k_peak_1072	224	.	13.1835	26.1972	22.478	115	TRUE	FALSE
chr1	52128014	52128275	Nanog_1k_peak_1077	222	.	11.6296	25.916	22.2072	174	TRUE	TRUE
chr1	52137477	52137578	Nanog_1k_peak_1079	143	.	10.1452	17.7224	14.3538	35	FALSE	TRUE
chr1	52201408	52201568	Nanog_1k_peak_1081	164	.	11.3431	19.8921	16.4262	87	FALSE	TRUE
chr1	52792662	52792992	Nanog_1k_peak_1087	663	.	20.8084	71.4346	66.3733	142	FALSE	FALSE
chr1	52932009	52932505	Nanog_1k_peak_1094	359	.	14.825	40.1501	35.9674	247	TRUE	FALSE
chr1	54063145	54063253	Nanog_1k_peak_1109	168	.	11.6514	20.3561	16.8703	53	TRUE	TRUE
chr1	54588475	54588886	Nanog_1k_peak_1120	169	.	10.9862	20.444	16.9544	265	FALSE	TRUE
chr1	54737224	54737379	Nanog_1k_peak_1123	162	.	11.0879	19.757	16.2967	98	FALSE	TRUE
chr1	54765234	54765472	Nanog_1k_peak_1127	621	.	20.3739	67.1329	62.182	135	FALSE	FALSE
chr1	54972265	54972512	Nanog_1k_peak_1129	336	.	17.1609	37.8045	33.6919	95	FALSE	FALSE
chr1	54996865	54996978	Nanog_1k_peak_1131	140	.	10.3403	17.399	14.0452	67	FALSE	TRUE
chr1	55679858	55680008	Nanog_1k_peak_1140	166	.	11.5768	20.1623	16.6851	59	TRUE	TRUE
chr1	55817108	55817288	Nanog_1k_peak_1142	230	.	14.2803	26.7785	23.0387	98	TRUE	TRUE
chr1	58672004	58672211	Nanog_1k_peak_1161	183	.	10.963	21.9355	18.3837	108	FALSE	FALSE
chr10	74410	74632	Nanog_1k_peak_1168	220	.	13.2488	25.7804	22.0767	83	FALSE	FALSE
chr10	188465	188591	Nanog_1k_peak_1169	199	.	12.5624	23.6166	19.9949	41	FALSE	TRUE
chr10	1956525	1956734	Nanog_1k_peak_1182	440	.	16.9699	48.5146	44.0834	79	FALSE	TRUE
chr10	1961645	1961929	Nanog_1k_peak_1183	598	.	20.9415	64.7495	59.8632	157	TRUE	FALSE
chr10	2155681	2155838	Nanog_1k_peak_1187	150	.	10.789	18.4297	15.029	97	TRUE	TRUE
chr10	2402457	2402762	Nanog_1k_peak_1188	160	.	10.7212	19.5366	16.0857	195	FALSE	TRUE
chr10	2427726	2428160	Nanog_1k_peak_1189	170	.	11.5456	20.5822	17.0864	109	FALSE	FALSE
chr10	3709982	3710288	Nanog_1k_peak_1205	166	.	11.2836	20.1067	16.6319	59	FALSE	TRUE
chr10	4144508	4144680	Nanog_1k_peak_1211	339	.	18.3643	38.0687	33.9482	41	TRUE	FALSE
chr10	5149289	5149535	Nanog_1k_peak_1222	209	.	13.0982	24.5674	20.909	167	TRUE	TRUE
chr10	5414079	5414205	Nanog_1k_peak_1224	212	.	12.7185	24.8734	21.2034	85	FALSE	TRUE
chr10	6010334	6010655	Nanog_1k_peak_1229	238	.	13.6724	27.5791	23.8092	212	FALSE	FALSE
chr10	6457750	6457952	Nanog_1k_peak_1234	375	.	18.6766	41.7383	37.5072	98	FALSE	TRUE
chr10	7650981	7651261	Nanog_1k_peak_1247	241	.	11.4049	27.9665	24.1837	59	FALSE	TRUE
chr10	7703146	7703271	Nanog_1k_peak_1249	271	.	15.9283	31.0888	27.1945	71	FALSE	TRUE
chr10	8624614	8624951	Nanog_1k_peak_1271	661	.	19.3935	71.184	66.13	167	TRUE	FALSE
chr10	8943058	8943160	Nanog_1k_peak_1275	194	.	12.2385	23.0531	19.4544	42	FALSE	TRUE
chr10	9299670	9299881	Nanog_1k_peak_1281	223	.	12.0604	26.045	22.332	171	FALSE	TRUE
chr10	9398636	9399484	Nanog_1k_peak_1287	486	.	13.45	53.1932	48.6238	326	FALSE	FALSE
chr10	9803207	9803684	Nanog_1k_peak_1299	308	.	14.2048	34.8385	30.8207	84	FALSE	TRUE
chr10	10015721	10015900	Nanog_1k_peak_1304	166	.	11.073	20.1381	16.6618	52	TRUE	FALSE
chr10	10047134	10047344	Nanog_1k_peak_1305	288	.	16.0744	32.849	28.8975	79	TRUE	FALSE
chr10	10319304	10319514	Nanog_1k_peak_1315	151	.	10.3927	18.5463	15.1402	112	FALSE	TRUE
chr10	10332436	10332603	Nanog_1k_peak_1317	277	.	13.8971	31.6379	27.7264	68	FALSE	TRUE
chr10	11015656	11016034	Nanog_1k_peak_1330	380	.	12.6904	42.3169	38.0692	179	FALSE	TRUE
chr10	11030951	11031060	Nanog_1k_peak_1333	170	.	10.7739	20.5773	17.0819	39	TRUE	TRUE
chr10	11254190	11254677	Nanog_1k_peak_1335	308	.	12.0125	34.8611	30.8423	123	FALSE	TRUE
chr10	12006252	12006387	Nanog_1k_peak_1343	243	.	15.0399	28.1577	24.3678	74	FALSE	TRUE
chr10	12516974	12517108	Nanog_1k_peak_1346	262	.	12.2348	30.0722	26.2133	71	FALSE	FALSE
chr10	13377042	13377171	Nanog_1k_peak_1353	203	.	12.2028	24.0029	20.3657	63	TRUE	TRUE
chr10	13554389	13554585	Nanog_1k_peak_1359	225	.	10.8008	26.2729	22.551	81	FALSE	TRUE
chr10	13572730	13572931	Nanog_1k_peak_1363	254	.	12.1355	29.2603	25.4303	103	TRUE	TRUE
chr10	14208969	14209124	Nanog_1k_peak_1370	338	.	17.9896	37.9681	33.8507	49	FALSE	FALSE
chr10	14300780	14300878	Nanog_1k_peak_1372	149	.	10.6473	18.3045	14.9092	19	TRUE	TRUE
chr10	14383903	14384185	Nanog_1k_peak_1377	222	.	12.7211	25.9775	22.2664	136	TRUE	TRUE
chr10	14488455	14488690	Nanog_1k_peak_1379	161	.	10.1854	19.6014	16.148	85	FALSE	TRUE
chr10	14566459	14566746	Nanog_1k_peak_1384	141	.	10.0487	17.5553	14.1941	123	TRUE	FALSE
chr10	14903021	14903315	Nanog_1k_peak_1388	155	.	10.1148	18.9893	15.5627	139	TRUE	TRUE
chr10	14928826	14929311	Nanog_1k_peak_1390	291	.	11.7591	33.0607	29.1014	345	TRUE	FALSE
chr10	14958690	14959035	Nanog_1k_peak_1392	201	.	12.3859	23.7933	20.1645	222	FALSE	TRUE
chr10	15074772	15075137	Nanog_1k_peak_1396	464	.	16.1892	50.9198	46.4149	226	TRUE	FALSE
chr10	15184670	15184999	Nanog_1k_peak_1399	427	.	19.764	47.1801	42.7893	181	FALSE	FALSE
chr10	15440557	15440691	Nanog_1k_peak_1402	141	.	10.2363	17.5417	14.1814	47	FALSE	TRUE
chr10	15705916	15706013	Nanog_1k_peak_1407	136	.	10.0978	16.9497	13.6173	43	TRUE	TRUE
chr10	15763587	15763674	Nanog_1k_peak_1409	136	.	10.0978	16.9497	13.6173	44	TRUE	TRUE
chr10	15854916	15855152	Nanog_1k_peak_1410	163	.	11.3127	19.8344	16.371	171	FALSE	FALSE
chr10	16029295	16029704	Nanog_1k_peak_1413	184	.	10.7011	22.0451	18.4879	207	TRUE	TRUE
chr10	16232353	16232776	Nanog_1k_peak_1420	379	.	16.4217	42.236	37.9906	61	FALSE	FALSE
chr10	16713336	16713586	Nanog_1k_peak_1426	366	.	16.4996	40.9008	36.6954	93	FALSE	FALSE
chr10	16800701	16800859	Nanog_1k_peak_1433	570	.	18.9376	61.8458	57.0372	83	FALSE	FALSE
chr10	17077380	17077580	Nanog_1k_peak_1439	212	.	11.0395	24.9061	21.2351	115	FALSE	TRUE
chr10	17427129	17427581	Nanog_1k_peak_1447	229	.	11.0327	26.689	22.952	104	FALSE	TRUE
chr10	17451450	17451712	Nanog_1k_peak_1448	270	.	12.748	30.9741	27.0846	104	FALSE	FALSE
chr10	17505814	17506172	Nanog_1k_peak_1453	719	.	20.6109	77.1636	71.9573	123	TRUE	FALSE
chr10	17544002	17544213	Nanog_1k_peak_1455	139	.	10.3097	17.3319	13.9815	67	TRUE	TRUE
chr10	17587472	17587868	Nanog_1k_peak_1456	291	.	13.2127	33.1077	29.146	162	FALSE	TRUE
chr10	17711285	17711454	Nanog_1k_peak_1459	209	.	12.2122	24.5635	20.9055	62	FALSE	TRUE
chr10	17843699	17843933	Nanog_1k_peak_1462	312	.	17.1206	35.2642	31.2324	151	TRUE	FALSE
chr10	18363761	18363901	Nanog_1k_peak_1472	147	.	10.667	18.1505	14.7625	66	FALSE	TRUE
chr10	18386946	18387244	Nanog_1k_peak_1474	244	.	13.3561	28.2145	24.4221	181	FALSE	TRUE
chr10	18789491	18789999	Nanog_1k_peak_1480	355	.	10.468	39.7121	35.5424	274	TRUE	TRUE
chr10	18912277	18912524	Nanog_1k_peak_1488	343	.	16.7521	38.4737	34.3411	160	FALSE	TRUE
chr10	19017392	19017576	Nanog_1k_peak_1489	149	.	10.5241	18.3882	14.9892	116	FALSE	TRUE
chr10	19219650	19219934	Nanog_1k_peak_1491	207	.	13.0328	24.4499	20.7963	210	FALSE	FALSE
chr10	19624724	19625231	Nanog_1k_peak_1495	276	.	13.4482	31.5297	27.6215	171	TRUE	TRUE
chr10	19905562	19906212	Nanog_1k_peak_1500	1023	.	25.215	108.168	102.366	168	FALSE	FALSE
chr10	19933232	19933500	Nanog_1k_peak_1502	290	.	15.1106	33.0298	29.0714	129	FALSE	TRUE
chr10	19947934	19948294	Nanog_1k_peak_1506	381	.	10.5523	42.4232	38.1719	292	TRUE	TRUE
chr10	20292744	20293142	Nanog_1k_peak_1517	349	.	15.8988	39.1509	34.9988	214	FALSE	FALSE
chr10	20321981	20322204	Nanog_1k_peak_1519	212	.	13.4896	24.9135	21.2421	115	FALSE	TRUE
chr10	20744554	20744727	Nanog_1k_peak_1528	252	.	13.4754	29.0241	25.2023	53	FALSE	TRUE
chr10	20755718	20755890	Nanog_1k_peak_1529	205	.	13.0988	24.17	20.5265	91	FALSE	TRUE
chr10	20805553	20805772	Nanog_1k_peak_1530	194	.	12.8004	23.0159	19.419	70	TRUE	TRUE
chr10	20872109	20872210	Nanog_1k_peak_1533	167	.	11.6106	20.2342	16.7538	54	TRUE	TRUE
chr10	20972340	20972502	Nanog_1k_peak_1534	224	.	12.4887	26.1691	22.451	51	TRUE	FALSE
chr10	21444376	21444672	Nanog_1k_peak_1545	151	.	10.1674	18.6044	15.1957	146	FALSE	TRUE
chr10	22064263	22064628	Nanog_1k_peak_1565	233	.	10.9497	27.1457	23.3918	205	TRUE	TRUE
chr10	22081238	22081791	Nanog_1k_peak_1568	587	.	13.8373	63.6119	58.7565	210	FALSE	FALSE
chr10	22155812	22156048	Nanog_1k_peak_1570	506	.	21.2735	55.2296	50.6037	93	TRUE	FALSE
chr10	22787969	22788264	Nanog_1k_peak_1576	230	.	11.8082	26.8264	23.0846	161	FALSE	TRUE
chr10	22918212	22918364	Nanog_1k_peak_1581	173	.	11.6965	20.8604	17.353	70	FALSE	TRUE
chr10	23416930	23417221	Nanog_1k_peak_1589	229	.	14.3457	26.636	22.9008	200	TRUE	FALSE
chr10	23638324	23638778	Nanog_1k_peak_1592	253	.	13.5806	29.2002	25.3723	159	FALSE	FALSE
chr10	23665048	23665454	Nanog_1k_peak_1596	303	.	15.1081	34.3397	30.338	254	FALSE	FALSE
chr10	24046365	24046754	Nanog_1k_peak_1601	327	.	16.1952	36.8464	32.7638	214	FALSE	TRUE
chr10	24055309	24055571	Nanog_1k_peak_1602	382	.	18.3183	42.5313	38.2775	94	FALSE	FALSE
chr10	24069759	24070172	Nanog_1k_peak_1604	433	.	11.5678	47.7139	43.3072	258	FALSE	TRUE
chr10	24132971	24133297	Nanog_1k_peak_1609	315	.	16.6263	35.5979	31.5556	130	TRUE	FALSE
chr10	24148091	24148369	Nanog_1k_peak_1610	256	.	14.0846	29.437	25.6007	74	TRUE	FALSE
chr10	24186344	24186751	Nanog_1k_peak_1611	256	.	10.5545	29.4375	25.6011	161	FALSE	TRUE
chr10	24825267	24825729	Nanog_1k_peak_1620	400	.	16.772	44.339	40.0337	130	FALSE	FALSE
chr10	24885792	24886148	Nanog_1k_peak_1623	289	.	16.8266	32.8568	28.9051	297	FALSE	FALSE
chr10	25039204	25039437	Nanog_1k_peak_1629	190	.	12.4767	22.6517	19.0697	195	FALSE	TRUE
chr10	25115681	25115987	Nanog_1k_peak_1630	137	.	10.1447	17.1116	13.7718	116	FALSE	TRUE
chr10	25212963	25213216	Nanog_1k_peak_1633	231	.	13.2639	26.8887	23.1446	95	TRUE	FALSE
chr10	25224251	25224412	Nanog_1k_peak_1635	252	.	11.3224	29.0582	25.2352	75	FALSE	TRUE
chr10	25531984	25532566	Nanog_1k_peak_1641	216	.	12.6793	25.346	21.6582	439	TRUE	FALSE
chr10	25793807	25793978	Nanog_1k_peak_1649	156	.	10.6906	19.0596	15.6301	61	FALSE	TRUE
chr10	25889059	25889457	Nanog_1k_peak_1653	235	.	13.176	27.3181	23.5584	274	FALSE	TRUE
chr10	26585252	26585604	Nanog_1k_peak_1669	344	.	18.3435	38.5981	34.4617	271	TRUE	TRUE
chr10	26712531	26712719	Nanog_1k_peak_1673	164	.	10.6566	19.8908	16.4251	62	FALSE	TRUE
chr10	26810862	26811341	Nanog_1k_peak_1676	165	.	10.4088	19.9712	16.5015	353	FALSE	TRUE
chr10	26934850	26935170	Nanog_1k_peak_1680	577	.	15.8364	62.5994	57.7741	130	TRUE	FALSE
chr10	26972628	26972864	Nanog_1k_peak_1682	389	.	18.3028	43.2279	38.9527	148	FALSE	FALSE
chr10	27204271	27204585	Nanog_1k_peak_1687	193	.	11.5614	22.9306	19.3371	121	FALSE	TRUE
chr10	27222172	27222569	Nanog_1k_peak_1688	422	.	16.7839	46.6396	42.268	149	FALSE	FALSE
chr10	27366008	27366486	Nanog_1k_peak_1693	215	.	11.9574	25.2813	21.596	247	FALSE	TRUE
chr10	27593275	27593422	Nanog_1k_peak_1697	222	.	13.6194	25.9457	22.2358	46	TRUE	TRUE
chr10	28152633	28152898	Nanog_1k_peak_1713	215	.	12.2449	25.1821	21.5005	137	FALSE	FALSE
chr10	28169746	28170286	Nanog_1k_peak_1714	315	.	13.1104	35.6204	31.5775	221	TRUE	TRUE
chr10	28177235	28177433	Nanog_1k_peak_1716	376	.	17.0659	41.8658	37.63	88	TRUE	FALSE
chr10	28192948	28193242	Nanog_1k_peak_1717	292	.	12.9231	33.2595	29.2927	152	FALSE	TRUE
chr10	28388646	28388910	Nanog_1k_peak_1729	397	.	16.1836	44.0532	39.7553	169	FALSE	FALSE
chr10	28526002	28526467	Nanog_1k_peak_1732	217	.	10.3511	25.4563	21.7645	354	FALSE	TRUE
chr10	28533766	28533848	Nanog_1k_peak_1733	216	.	12.6524	25.3008	21.6149	55	TRUE	TRUE
chr10	28587296	28587529	Nanog_1k_peak_1735	336	.	17.4924	37.7202	33.6108	99	TRUE	TRUE
chr10	28642031	28642270	Nanog_1k_peak_1736	529	.	14.7106	57.678	52.9851	124	FALSE	TRUE
chr10	28676201	28676474	Nanog_1k_peak_1740	238	.	12.2496	27.5789	23.8091	95	FALSE	TRUE
chr10	28740495	28740738	Nanog_1k_peak_1741	427	.	19.764	47.1801	42.7893	157	FALSE	FALSE
chr10	28860378	28860575	Nanog_1k_peak_1746	286	.	15.256	32.639	28.6946	99	TRUE	FALSE
chr10	29104547	29105107	Nanog_1k_peak_1752	188	.	11.2432	22.4011	18.8288	447	TRUE	TRUE
chr10	29242797	29243025	Nanog_1k_peak_1754	230	.	14.1113	26.8392	23.0969	49	FALSE	FALSE
chr10	29769992	29770198	Nanog_1k_peak_1766	369	.	17.9195	41.1454	36.9321	80	FALSE	FALSE
chr10	29887978	29888269	Nanog_1k_peak_1771	457	.	13.713	50.2191	45.7371	101	FALSE	TRUE
chr10	29894489	29894793	Nanog_1k_peak_1775	423	.	12.2147	46.6877	42.3138	196	FALSE	TRUE
chr10	29917962	29919120	Nanog_1k_peak_1776	650	.	14.049	70.0962	65.0687	220	FALSE	FALSE
chr10	29929567	29929943	Nanog_1k_peak_1777	384	.	13.9015	42.7174	38.4589	222	FALSE	FALSE
chr10	29932107	29932272	Nanog_1k_peak_1778	233	.	10.2764	27.0897	23.3381	96	FALSE	FALSE
chr10	30007033	30007439	Nanog_1k_peak_1780	307	.	14.1356	34.7189	30.7045	340	TRUE	TRUE
chr10	30110928	30111155	Nanog_1k_peak_1785	159	.	11.0756	19.3896	15.9456	73	TRUE	TRUE
chr10	30165584	30165905	Nanog_1k_peak_1788	247	.	13.9133	28.5578	24.7524	204	FALSE	TRUE
chr10	30862834	30863221	Nanog_1k_peak_1806	387	.	19.4054	42.9943	38.7261	100	FALSE	TRUE
chr10	31432967	31433284	Nanog_1k_peak_1812	266	.	13.5958	30.484	26.6112	193	FALSE	TRUE
chr10	31568804	31568923	Nanog_1k_peak_1814	167	.	11.3696	20.2618	16.7803	53	FALSE	TRUE
chr10	31871031	31871138	Nanog_1k_peak_1818	157	.	11.1236	19.23	15.7934	79	FALSE	TRUE
chr10	32206502	32206651	Nanog_1k_peak_1824	268	.	15.76	30.7697	26.8873	96	FALSE	FALSE
chr10	32260723	32260944	Nanog_1k_peak_1825	184	.	11.6384	22.0269	18.4705	69	FALSE	TRUE
chr10	32494242	32494381	Nanog_1k_peak_1827	232	.	14.3984	27.0104	23.2614	58	TRUE	FALSE
chr10	32506684	32506774	Nanog_1k_peak_1828	256	.	15.6032	29.5343	25.6944	37	FALSE	TRUE
chr10	32762618	32762870	Nanog_1k_peak_1834	233	.	13.0694	27.1397	23.3859	163	TRUE	FALSE
chr10	32893191	32893343	Nanog_1k_peak_1837	158	.	10.5771	19.2926	15.8529	45	FALSE	TRUE
chr10	33342332	33342514	Nanog_1k_peak_1841	249	.	14.0646	28.8139	24.9998	60	TRUE	FALSE
chr10	33521027	33521250	Nanog_1k_peak_1844	155	.	10.9702	18.9266	15.503	24	FALSE	FALSE
chr10	33527588	33527712	Nanog_1k_peak_1845	225	.	14.1821	26.2952	22.5726	68	FALSE	FALSE
chr10	33594470	33594589	Nanog_1k_peak_1847	153	.	10.9488	18.7438	15.3285	65	FALSE	TRUE
chr10	33622148	33622347	Nanog_1k_peak_1848	138	.	10.0299	17.1687	13.8257	79	FALSE	FALSE
chr10	33671773	33671919	Nanog_1k_peak_1849	190	.	12.2592	22.6406	19.059	85	FALSE	TRUE
chr10	33911831	33912024	Nanog_1k_peak_1858	160	.	10.6727	19.4544	16.0074	55	FALSE	TRUE
chr10	34532689	34532961	Nanog_1k_peak_1864	160	.	10.7212	19.5366	16.0857	131	TRUE	TRUE
chr10	34703835	34704287	Nanog_1k_peak_1866	408	.	15.9695	45.1694	40.8394	245	TRUE	FALSE
chr10	35152437	35152783	Nanog_1k_peak_1871	485	.	16.5222	53.1221	48.5553	208	FALSE	FALSE
chr10	35236940	35237101	Nanog_1k_peak_1873	303	.	16.5903	34.3246	30.3235	53	FALSE	TRUE
chr10	35257323	35257677	Nanog_1k_peak_1874	291	.	15.1721	33.1332	29.1708	254	TRUE	FALSE
chr10	35264938	35265112	Nanog_1k_peak_1875	272	.	15.442	31.1847	27.2875	124	FALSE	TRUE
chr10	35554031	35554269	Nanog_1k_peak_1878	191	.	12.041	22.713	19.1282	109	FALSE	FALSE
chr10	35743500	35743596	Nanog_1k_peak_1884	243	.	11.8284	28.0947	24.3071	66	FALSE	TRUE
chr10	35743784	35744036	Nanog_1k_peak_1885	255	.	12.1913	29.3581	25.525	107	FALSE	FALSE
chr10	35876678	35876929	Nanog_1k_peak_1886	263	.	12.6971	30.2386	26.3735	185	FALSE	TRUE
chr10	35910126	35910269	Nanog_1k_peak_1888	148	.	10.7225	18.2709	14.8772	84	FALSE	TRUE
chr10	36026398	36026618	Nanog_1k_peak_1890	606	.	23.8455	65.525	60.617	107	FALSE	FALSE
chr10	36234588	36234913	Nanog_1k_peak_1894	704	.	24.9996	75.5733	70.4085	146	FALSE	FALSE
chr10	36259431	36259672	Nanog_1k_peak_1895	203	.	10.8167	23.9388	20.3038	71	FALSE	TRUE
chr10	37137400	37137509	Nanog_1k_peak_1907	194	.	10.9894	23.0854	19.4858	53	FALSE	TRUE
chr10	37498200	37498466	Nanog_1k_peak_1911	163	.	10.5886	19.777	16.3162	203	FALSE	TRUE
chr10	37776581	37776711	Nanog_1k_peak_1913	141	.	10.3416	17.4951	14.1368	56	FALSE	TRUE
chr10	38472521	38472968	Nanog_1k_peak_1923	447	.	18.6807	49.1895	44.7379	164	FALSE	FALSE
chr10	38731634	38731941	Nanog_1k_peak_1928	213	.	13.0976	25.0221	21.3462	225	TRUE	TRUE
chr10	39083933	39084227	Nanog_1k_peak_1931	403	.	19.9762	44.6623	40.3464	160	FALSE	TRUE
chr10	39212734	39212901	Nanog_1k_peak_1932	509	.	23.7828	55.5836	50.9489	115	FALSE	FALSE
chr10	39248879	39249018	Nanog_1k_peak_1933	278	.	16.0355	31.738	27.823	84	FALSE	TRUE
chr10	39249348	39249501	Nanog_1k_peak_1934	214	.	13.4352	25.18	21.4985	64	FALSE	TRUE
chr10	39717527	39717857	Nanog_1k_peak_1940	338	.	17.2727	37.9947	33.8763	68	TRUE	TRUE
chr10	40160319	40160679	Nanog_1k_peak_1946	381	.	14.8717	42.4099	38.1589	105	FALSE	FALSE
chr10	40536576	40536703	Nanog_1k_peak_1951	155	.	10.6398	18.9715	15.5458	51	TRUE	TRUE
chr10	40599059	40599236	Nanog_1k_peak_1955	240	.	13.5063	27.8722	24.0926	70	TRUE	TRUE
chr10	40606300	40606521	Nanog_1k_peak_1956	266	.	10.7779	30.4957	26.6227	150	TRUE	TRUE
chr10	40607955	40608243	Nanog_1k_peak_1957	405	.	13.8962	44.8558	40.5349	84	TRUE	FALSE
chr10	40619356	40619851	Nanog_1k_peak_1958	358	.	14.782	40.0725	35.8924	215	FALSE	TRUE
chr10	40642833	40642982	Nanog_1k_peak_1961	179	.	10.6964	21.4925	17.9589	55	TRUE	TRUE
chr10	40646965	40647163	Nanog_1k_peak_1962	164	.	10.9447	19.9178	16.4507	156	TRUE	TRUE
chr10	40756620	40756790	Nanog_1k_peak_1964	259	.	15.6449	29.827	25.9762	49	TRUE	TRUE
chr10	40768358	40768739	Nanog_1k_peak_1965	496	.	19.7386	54.2208	49.6223	207	TRUE	FALSE
chr10	40774344	40774702	Nanog_1k_peak_1966	388	.	16.4785	43.0773	38.8072	200	TRUE	FALSE
chr10	40781344	40781463	Nanog_1k_peak_1967	141	.	10.3416	17.4951	14.1368	70	TRUE	TRUE
chr10	41728506	41728970	Nanog_1k_peak_1983	344	.	15.5758	38.5973	34.4611	144	TRUE	TRUE
chr10	41758708	41759156	Nanog_1k_peak_1984	585	.	20.1796	63.348	58.5004	268	FALSE	FALSE
chr10	41765761	41765873	Nanog_1k_peak_1985	190	.	11.3548	22.5867	19.0074	59	TRUE	TRUE
chr10	41986195	41986365	Nanog_1k_peak_1989	217	.	12.3914	25.4266	21.7359	91	FALSE	FALSE
chr10	42130990	42131241	Nanog_1k_peak_1992	162	.	10.8194	19.7037	16.2458	54	FALSE	TRUE
chr10	42253968	42254538	Nanog_1k_peak_1996	268	.	13.3437	30.7011	26.8209	193	FALSE	FALSE
chr10	42295981	42296322	Nanog_1k_peak_1998	532	.	15.8494	57.9637	53.264	186	FALSE	FALSE
chr10	42348139	42348482	Nanog_1k_peak_2002	626	.	22.5458	67.6394	62.6752	148	TRUE	FALSE
chr10	42532388	42532622	Nanog_1k_peak_2006	177	.	12.0205	21.2274	17.7046	101	FALSE	TRUE
chr10	42598890	42599150	Nanog_1k_peak_2008	176	.	11.675	21.1903	17.6692	179	FALSE	TRUE
chr10	42668535	42668698	Nanog_1k_peak_2010	136	.	10.1297	16.9451	13.6135	129	FALSE	TRUE
chr10	44301194	44301361	Nanog_1k_peak_2024	175	.	11.9188	21.0204	17.506	104	FALSE	FALSE
chr10	45009364	45009656	Nanog_1k_peak_2033	448	.	16.1321	49.2717	44.8177	135	TRUE	FALSE
chr10	45345438	45345668	Nanog_1k_peak_2040	173	.	11.2091	20.821	17.3149	139	FALSE	TRUE
chr11	393901	394056	Nanog_1k_peak_2047	227	.	13.6603	26.4947	22.7647	64	FALSE	FALSE
chr11	884224	884332	Nanog_1k_peak_2050	202	.	13.0994	23.8516	20.2207	61	FALSE	FALSE
chr11	1435157	1435478	Nanog_1k_peak_2053	214	.	12.2209	25.142	21.4619	233	FALSE	FALSE
chr11	2735201	2735436	Nanog_1k_peak_2085	144	.	10.528	17.8186	14.446	91	FALSE	FALSE
chr11	2855207	2855442	Nanog_1k_peak_2089	148	.	10.2032	18.2232	14.8317	59	TRUE	TRUE
chr11	3027007	3027436	Nanog_1k_peak_2093	416	.	13.7453	45.9762	41.6238	227	FALSE	TRUE
chr11	3176536	3176798	Nanog_1k_peak_2097	502	.	21.0775	54.8954	50.2788	110	FALSE	FALSE
chr11	3191210	3191487	Nanog_1k_peak_2099	362	.	16.677	40.4767	36.2842	85	FALSE	TRUE
chr11	3330358	3330569	Nanog_1k_peak_2103	230	.	10.4174	26.7631	23.0237	102	FALSE	TRUE
chr11	3503372	3503737	Nanog_1k_peak_2107	188	.	11.5735	22.4219	18.8488	180	FALSE	TRUE
chr11	3859809	3860056	Nanog_1k_peak_2111	652	.	10.7566	70.2828	65.2521	154	FALSE	TRUE
chr11	3869895	3870441	Nanog_1k_peak_2114	567	.	12.6128	61.531	56.7322	304	FALSE	TRUE
chr11	3979603	3979801	Nanog_1k_peak_2115	151	.	10.8563	18.5931	15.1849	24	FALSE	TRUE
chr11	4108554	4108791	Nanog_1k_peak_2118	176	.	11.8513	21.1494	17.6298	78	TRUE	TRUE
chr11	4398419	4398660	Nanog_1k_peak_2121	145	.	10.5762	17.9648	14.5856	88	TRUE	TRUE
chr11	4425571	4425705	Nanog_1k_peak_2122	153	.	10.7108	18.7224	15.3078	65	TRUE	TRUE
chr11	4473067	4473498	Nanog_1k_peak_2124	155	.	10.391	18.979	15.5529	130	FALSE	TRUE
chr11	4683717	4684062	Nanog_1k_peak_2126	186	.	11.7431	22.2045	18.6402	140	FALSE	TRUE
chr11	4832964	4833174	Nanog_1k_peak_2128	157	.	10.742	19.1488	15.7156	61	FALSE	TRUE
chr11	4896563	4896844	Nanog_1k_peak_2130	232	.	12.2647	26.9916	23.2433	87	FALSE	TRUE
chr11	5457999	5458376	Nanog_1k_peak_2135	197	.	10.817	23.3635	19.7523	141	FALSE	TRUE
chr11	5584557	5584672	Nanog_1k_peak_2137	152	.	10.9168	18.675	15.2625	31	FALSE	TRUE
chr11	5681681	5682003	Nanog_1k_peak_2138	424	.	13.1412	46.7883	42.4104	150	FALSE	TRUE
chr11	5817790	5817927	Nanog_1k_peak_2142	340	.	17.348	38.123	34.0008	67	FALSE	FALSE
chr11	5952583	5952689	Nanog_1k_peak_2143	200	.	13.0272	23.7089	20.0835	70	TRUE	TRUE
chr11	6010026	6010174	Nanog_1k_peak_2145	627	.	26.6416	67.7122	62.7462	66	FALSE	FALSE
chr11	6212504	6212658	Nanog_1k_peak_2147	179	.	11.8507	21.504	17.97	84	FALSE	TRUE
chr11	6452784	6452965	Nanog_1k_peak_2151	202	.	10.459	23.8989	20.2656	43	TRUE	FALSE
chr11	6592819	6592967	Nanog_1k_peak_2155	188	.	12.3462	22.4082	18.8355	71	FALSE	TRUE
chr11	6701103	6701344	Nanog_1k_peak_2156	290	.	14.6917	32.9764	29.0203	170	FALSE	FALSE
chr11	6701892	6702019	Nanog_1k_peak_2157	159	.	10.0289	19.3424	15.9006	60	FALSE	TRUE
chr11	7147404	7147716	Nanog_1k_peak_2162	378	.	15.9375	42.1301	37.8875	169	FALSE	FALSE
chr11	7554976	7555238	Nanog_1k_peak_2169	147	.	10.3692	18.1141	14.7278	190	FALSE	TRUE
chr11	7581730	7581875	Nanog_1k_peak_2172	190	.	10.7425	22.6708	19.088	90	TRUE	TRUE
chr11	7588298	7588843	Nanog_1k_peak_2174	449	.	16.6295	49.4379	44.9785	288	FALSE	FALSE
chr11	7602539	7602754	Nanog_1k_peak_2176	304	.	13.5902	34.4473	30.4414	95	TRUE	TRUE
chr11	7657017	7657312	Nanog_1k_peak_2178	211	.	11.6556	24.776	21.1096	201	FALSE	TRUE
chr11	7691545	7691639	Nanog_1k_peak_2180	150	.	10.3208	18.4234	15.0231	41	FALSE	TRUE
chr11	8604879	8605007	Nanog_1k_peak_2187	252	.	15.2523	29.0265	25.2045	56	FALSE	FALSE
chr11	8709476	8709613	Nanog_1k_peak_2189	263	.	15.6832	30.2222	26.3578	76	FALSE	FALSE
chr11	9409511	9410130	Nanog_1k_peak_2197	344	.	13.9525	38.5594	34.424	156	TRUE	TRUE
chr11	9746473	9746730	Nanog_1k_peak_2208	217	.	11.0146	25.4558	21.764	109	FALSE	TRUE
chr11	10157395	10157810	Nanog_1k_peak_2217	243	.	12.9732	28.1826	24.3915	92	TRUE	FALSE
chr11	10328080	10328583	Nanog_1k_peak_2221	165	.	10.4088	19.9712	16.5015	161	FALSE	TRUE
chr11	10376536	10376970	Nanog_1k_peak_2225	341	.	12.4094	38.3226	34.195	337	TRUE	FALSE
chr11	10515812	10516161	Nanog_1k_peak_2229	470	.	19.1698	51.619	47.0943	268	TRUE	FALSE
chr11	10624587	10624898	Nanog_1k_peak_2231	366	.	16.9224	40.893	36.6882	180	FALSE	FALSE
chr11	10807320	10807520	Nanog_1k_peak_2237	139	.	10.2282	17.273	13.9247	97	TRUE	TRUE
chr11	11215367	11215664	Nanog_1k_peak_2245	895	.	28.5173	95.1606	89.5939	200	TRUE	FALSE
chr11	11578462	11578686	Nanog_1k_peak_2247	492	.	20.9278	53.8307	49.2432	110	FALSE	FALSE
chr11	11583546	11583860	Nanog_1k_peak_2248	499	.	20.885	54.5671	49.9584	150	TRUE	FALSE
chr11	11731488	11731786	Nanog_1k_peak_2249	740	.	26.0596	79.2852	74.0359	142	TRUE	FALSE
chr11	11930675	11930834	Nanog_1k_peak_2253	154	.	10.0738	18.9214	15.4981	63	TRUE	TRUE
chr11	12007811	12008201	Nanog_1k_peak_2255	300	.	14.5574	34.0821	30.0884	130	FALSE	FALSE
chr11	12774953	12775039	Nanog_1k_peak_2258	200	.	13.0272	23.7089	20.0835	39	FALSE	TRUE
chr11	12865079	12865266	Nanog_1k_peak_2259	251	.	13.4494	28.9805	25.1603	24	FALSE	FALSE
chr11	13526182	13526641	Nanog_1k_peak_2265	212	.	11.3661	24.8743	21.2041	280	FALSE	TRUE
chr11	13747559	13748073	Nanog_1k_peak_2267	353	.	13.7135	39.5176	35.3541	398	TRUE	FALSE
chr11	14144681	14145093	Nanog_1k_peak_2269	178	.	10.6566	21.4263	17.8955	119	TRUE	TRUE
chr11	14324235	14324449	Nanog_1k_peak_2271	214	.	11.1455	25.0885	21.4101	74	FALSE	TRUE
chr11	14431063	14431324	Nanog_1k_peak_2279	210	.	11.9622	24.7105	21.0469	169	TRUE	TRUE
chr11	14475525	14475708	Nanog_1k_peak_2281	175	.	11.6176	21.0885	17.5712	127	FALSE	TRUE
chr11	14813002	14813156	Nanog_1k_peak_2288	175	.	11.82	21.0907	17.573	50	FALSE	FALSE
chr11	15064889	15065076	Nanog_1k_peak_2290	278	.	16.077	31.8147	27.8974	95	TRUE	FALSE
chr11	15113907	15114023	Nanog_1k_peak_2293	177	.	11.4941	21.3071	17.7812	67	FALSE	FALSE
chr11	15150824	15150931	Nanog_1k_peak_2298	239	.	14.8602	27.7506	23.9752	69	FALSE	TRUE
chr11	15869609	15869753	Nanog_1k_peak_2302	149	.	10.7593	18.3421	14.9451	93	FALSE	TRUE
chr11	16395886	16396035	Nanog_1k_peak_2307	270	.	14.9637	30.9263	27.0384	87	FALSE	TRUE
chr11	17055424	17055597	Nanog_1k_peak_2316	140	.	10.1579	17.3993	14.0454	77	FALSE	TRUE
chr11	17211912	17212218	Nanog_1k_peak_2320	308	.	14.6098	34.8498	30.8316	143	FALSE	TRUE
chr11	17371324	17371538	Nanog_1k_peak_2325	288	.	14.9591	32.775	28.826	67	TRUE	FALSE
chr11	17532488	17532695	Nanog_1k_peak_2326	296	.	16.1665	33.585	29.6076	57	TRUE	TRUE
chr11	17664296	17664487	Nanog_1k_peak_2329	197	.	12.4131	23.3559	19.745	85	FALSE	TRUE
chr11	17806807	17806960	Nanog_1k_peak_2330	164	.	10.9194	19.8745	16.4095	121	TRUE	TRUE
chr11	17810009	17810309	Nanog_1k_peak_2331	141	.	10.0012	17.4732	14.1162	69	TRUE	TRUE
chr11	17839666	17839854	Nanog_1k_peak_2332	359	.	19.8243	40.1045	35.9237	83	FALSE	FALSE
chr11	17907285	17907619	Nanog_1k_peak_2333	468	.	19.9406	51.3487	46.8316	212	FALSE	FALSE
chr11	18486281	18486632	Nanog_1k_peak_2339	353	.	18.139	39.4801	35.3174	112	FALSE	TRUE
chr11	18711887	18712124	Nanog_1k_peak_2347	500	.	14.7019	54.661	50.0499	135	TRUE	TRUE
chr11	18726524	18726695	Nanog_1k_peak_2350	175	.	11.3628	21.0825	17.5656	124	FALSE	TRUE
chr11	18740722	18741255	Nanog_1k_peak_2352	768	.	20.0792	82.148	76.8367	135	TRUE	FALSE
chr11	18992942	18993370	Nanog_1k_peak_2362	382	.	14.5378	42.5107	38.2577	125	TRUE	TRUE
chr11	18998585	18998834	Nanog_1k_peak_2363	927	.	28.1491	98.4213	92.796	116	FALSE	FALSE
chr11	19019693	19019878	Nanog_1k_peak_2364	190	.	11.9857	22.6183	19.0376	108	TRUE	TRUE
chr11	19081010	19081275	Nanog_1k_peak_2366	211	.	12.6622	24.7778	21.1113	104	FALSE	TRUE
chr11	19225370	19225522	Nanog_1k_peak_2369	157	.	11.1236	19.23	15.7934	54	TRUE	TRUE
chr11	19647991	19648231	Nanog_1k_peak_2376	245	.	14.1068	28.3197	24.5234	103	TRUE	TRUE
chr11	19723125	19723414	Nanog_1k_peak_2377	455	.	20.9983	50.0306	45.5538	130	TRUE	FALSE
chr11	19780459	19780744	Nanog_1k_peak_2379	188	.	11.8766	22.4319	18.8584	148	FALSE	TRUE
chr11	19819244	19819423	Nanog_1k_peak_2380	143	.	10.4284	17.667	14.301	61	TRUE	TRUE
chr11	19881005	19881138	Nanog_1k_peak_2382	184	.	11.0264	22.0408	18.4839	65	FALSE	TRUE
chr11	19948025	19948437	Nanog_1k_peak_2384	538	.	22.2398	58.5232	53.8075	151	FALSE	FALSE
chr11	20054563	20054872	Nanog_1k_peak_2389	328	.	10.3373	36.9167	32.8318	193	FALSE	TRUE
chr11	20056889	20057147	Nanog_1k_peak_2390	530	.	11.6128	57.782	53.0862	167	TRUE	TRUE
chr11	20067525	20067773	Nanog_1k_peak_2394	264	.	13.0944	30.2769	26.4101	121	TRUE	TRUE
chr11	20465297	20465567	Nanog_1k_peak_2398	255	.	13.3371	29.4148	25.5788	189	FALSE	TRUE
chr11	20479577	20479992	Nanog_1k_peak_2401	562	.	13.1636	61.0168	56.232	234	FALSE	FALSE
chr11	20493685	20493964	Nanog_1k_peak_2404	265	.	10.7534	30.4467	26.575	80	TRUE	TRUE
chr11	20968220	20968348	Nanog_1k_peak_2412	192	.	12.6915	22.7921	19.2042	35	TRUE	TRUE
chr11	21235498	21235869	Nanog_1k_peak_2416	275	.	13.7975	31.4698	27.5637	285	FALSE	FALSE
chr11	21586187	21586349	Nanog_1k_peak_2421	385	.	17.1738	42.7871	38.5267	58	FALSE	FALSE
chr11	21612046	21612294	Nanog_1k_peak_2422	374	.	14.8775	41.6925	37.4631	144	TRUE	FALSE
chr11	21910133	21910293	Nanog_1k_peak_2433	184	.	11.8785	21.9712	18.4169	91	FALSE	TRUE
chr11	22092331	22092532	Nanog_1k_peak_2436	235	.	13.176	27.3181	23.5584	106	FALSE	TRUE
chr11	22234034	22234236	Nanog_1k_peak_2442	232	.	14.2213	27.0426	23.2923	98	TRUE	FALSE
chr11	22258473	22258652	Nanog_1k_peak_2444	176	.	11.675	21.1903	17.6692	69	FALSE	TRUE
chr11	22612697	22612987	Nanog_1k_peak_2449	156	.	10.9042	19.0737	15.6436	45	FALSE	TRUE
chr11	22622377	22622536	Nanog_1k_peak_2450	149	.	10.4979	18.3418	14.9449	118	TRUE	TRUE
chr11	22701735	22702068	Nanog_1k_peak_2453	324	.	15.9745	36.4745	32.4037	220	FALSE	FALSE
chr11	22715505	22715764	Nanog_1k_peak_2454	193	.	11.5614	22.9306	19.3371	67	FALSE	TRUE
chr11	22994861	22995091	Nanog_1k_peak_2459	175	.	11.7889	21.0324	17.5177	162	FALSE	TRUE
chr11	23089889	23090277	Nanog_1k_peak_2465	154	.	10.0331	18.8541	15.434	175	FALSE	TRUE
chr11	23178304	23178527	Nanog_1k_peak_2471	270	.	16.035	30.9227	27.0351	84	FALSE	TRUE
chr11	23696422	23696641	Nanog_1k_peak_2477	246	.	14.4614	28.4051	24.6057	145	FALSE	FALSE
chr11	23797196	23797327	Nanog_1k_peak_2480	195	.	12.2962	23.1529	19.5497	69	TRUE	TRUE
chr11	24067945	24068404	Nanog_1k_peak_2488	739	.	13.8799	79.1564	73.9092	303	TRUE	FALSE
chr11	24123834	24124287	Nanog_1k_peak_2490	423	.	15.588	46.7181	42.3428	206	TRUE	FALSE
chr11	24629019	24629463	Nanog_1k_peak_2496	212	.	11.057	24.9362	21.2639	366	TRUE	TRUE
chr11	24629903	24630039	Nanog_1k_peak_2497	187	.	10.1863	22.2878	18.7201	35	TRUE	TRUE
chr11	24796423	24796661	Nanog_1k_peak_2502	224	.	12.5129	26.2095	22.4899	128	FALSE	TRUE
chr11	24849799	24850036	Nanog_1k_peak_2504	500	.	19.0489	54.6343	50.0239	90	TRUE	FALSE
chr11	24940423	24940747	Nanog_1k_peak_2508	558	.	21.4901	60.597	55.8231	187	TRUE	FALSE
chr11	25002887	25003085	Nanog_1k_peak_2512	225	.	10.8159	26.3001	22.5773	63	TRUE	TRUE
chr11	25044468	25044962	Nanog_1k_peak_2517	282	.	12.6924	32.184	28.254	178	FALSE	FALSE
chr11	25231270	25231701	Nanog_1k_peak_2520	217	.	12.7334	25.437	21.7457	282	FALSE	TRUE
chr11	25256909	25257374	Nanog_1k_peak_2522	697	.	14.6491	74.8533	69.7069	148	FALSE	FALSE
chr11	25273887	25274241	Nanog_1k_peak_2526	623	.	17.2216	67.3435	62.387	158	FALSE	FALSE
chr11	25467410	25467599	Nanog_1k_peak_2531	220	.	11.8685	25.7223	22.0208	95	FALSE	TRUE
chr11	25472319	25472492	Nanog_1k_peak_2532	252	.	12.4192	29.12	25.2948	109	FALSE	TRUE
chr11	25808311	25808615	Nanog_1k_peak_2536	198	.	12.1926	23.4646	19.8489	177	FALSE	TRUE
chr11	25965231	25965758	Nanog_1k_peak_2539	349	.	15.0425	39.1009	34.9505	321	TRUE	FALSE
chr11	26199920	26200029	Nanog_1k_peak_2543	329	.	16.3241	37.0635	32.9736	58	FALSE	TRUE
chr11	26476082	26476180	Nanog_1k_peak_2551	151	.	10.8532	18.5397	15.1342	64	FALSE	TRUE
chr11	27294745	27295148	Nanog_1k_peak_2565	273	.	14.057	31.2598	27.3601	106	TRUE	TRUE
chr11	27615390	27615621	Nanog_1k_peak_2575	221	.	12.3221	25.8908	22.1828	149	FALSE	FALSE
chr11	27625111	27625424	Nanog_1k_peak_2577	542	.	17.0567	58.9352	54.2076	142	FALSE	FALSE
chr11	27653050	27653562	Nanog_1k_peak_2578	218	.	11.0823	25.5738	21.8781	246	FALSE	TRUE
chr11	27716567	27716684	Nanog_1k_peak_2580	258	.	14.9194	29.7293	25.8823	55	FALSE	TRUE
chr11	27947718	27948100	Nanog_1k_peak_2582	227	.	12.6599	26.4551	22.7263	171	TRUE	TRUE
chr11	27965077	27965728	Nanog_1k_peak_2584	744	.	17.2859	79.727	74.467	421	TRUE	FALSE
chr11	28800330	28800880	Nanog_1k_peak_2603	451	.	13.4446	49.6048	45.1397	240	FALSE	FALSE
chr11	28957197	28957430	Nanog_1k_peak_2605	243	.	14.3226	28.1606	24.3702	75	FALSE	TRUE
chr11	29232346	29232714	Nanog_1k_peak_2615	249	.	12.9771	28.8092	24.9954	240	TRUE	TRUE
chr11	29440530	29440827	Nanog_1k_peak_2619	157	.	10.9892	19.2298	15.7933	152	FALSE	TRUE
chr11	29496305	29496537	Nanog_1k_peak_2620	234	.	13.7929	27.2392	23.4822	58	FALSE	TRUE
chr11	29831304	29831662	Nanog_1k_peak_2626	175	.	10.7755	21.0931	17.5753	198	FALSE	TRUE
chr11	30005129	30005323	Nanog_1k_peak_2633	202	.	10.4748	23.9264	20.2921	57	FALSE	TRUE
chr11	30341332	30341649	Nanog_1k_peak_2638	251	.	14.1261	28.9181	25.1003	61	FALSE	FALSE
chr11	30399055	30399396	Nanog_1k_peak_2641	688	.	18.7055	73.9531	68.8282	109	TRUE	FALSE
chr11	30417943	30418243	Nanog_1k_peak_2643	333	.	15.747	37.4747	33.3719	126	TRUE	FALSE
chr11	30647299	30647486	Nanog_1k_peak_2646	137	.	10.1172	17.0587	13.7211	126	FALSE	TRUE
chr11	31033657	31033840	Nanog_1k_peak_2653	504	.	18.8241	55.0449	50.424	133	TRUE	FALSE
chr11	31041939	31042171	Nanog_1k_peak_2654	458	.	17.0962	50.3018	45.8174	181	FALSE	FALSE
chr11	31324283	31324404	Nanog_1k_peak_2659	155	.	10.3682	18.9407	15.5163	53	FALSE	FALSE
chr11	31386826	31387267	Nanog_1k_peak_2660	193	.	10.8931	22.9239	19.3307	376	TRUE	TRUE
chr11	31625022	31625156	Nanog_1k_peak_2666	175	.	11.6176	21.0885	17.5712	39	FALSE	TRUE
chr11	31841114	31841722	Nanog_1k_peak_2670	487	.	11.4586	53.3399	48.7658	461	FALSE	TRUE
chr11	31873594	31873891	Nanog_1k_peak_2672	339	.	16.4907	38.0329	33.9134	126	FALSE	TRUE
chr11	32215539	32215830	Nanog_1k_peak_2682	179	.	10.3485	21.4549	17.9226	97	FALSE	TRUE
chr11	32387879	32388059	Nanog_1k_peak_2686	147	.	10.5625	18.1447	14.7569	66	TRUE	TRUE
chr11	32724010	32724143	Nanog_1k_peak_2689	144	.	10.3968	17.8362	14.4628	49	FALSE	TRUE
chr11	32739014	32739125	Nanog_1k_peak_2691	136	.	10.0898	17.0063	13.6708	37	TRUE	TRUE
chr11	33117174	33117353	Nanog_1k_peak_2700	241	.	14.2202	27.9811	24.1976	93	TRUE	FALSE
chr11	33317494	33317643	Nanog_1k_peak_2707	258	.	10.3641	29.6601	25.8155	55	FALSE	TRUE
chr11	33576728	33576899	Nanog_1k_peak_2717	168	.	11.1778	20.319	16.835	82	FALSE	TRUE
chr11	34313753	34314078	Nanog_1k_peak_2722	207	.	11.4289	24.3957	20.7441	116	FALSE	TRUE
chr11	34824002	34824273	Nanog_1k_peak_2727	347	.	18.5258	38.9255	34.7803	196	FALSE	TRUE
chr11	34908357	34908534	Nanog_1k_peak_2728	172	.	11.666	20.8039	17.2983	111	FALSE	TRUE
chr11	35048589	35049061	Nanog_1k_peak_2730	1107	.	19.5534	116.626	110.713	279	FALSE	FALSE
chr11	35057367	35057640	Nanog_1k_peak_2732	193	.	11.5614	22.9306	19.3371	178	FALSE	TRUE
chr11	35066199	35066518	Nanog_1k_peak_2733	612	.	18.2005	66.1827	61.256	144	FALSE	FALSE
chr11	35066806	35067034	Nanog_1k_peak_2734	380	.	13.3403	42.295	38.048	99	FALSE	FALSE
chr11	35077851	35078095	Nanog_1k_peak_2736	207	.	11.0846	24.3962	20.7445	113	FALSE	TRUE
chr11	35135818	35136073	Nanog_1k_peak_2740	214	.	11.1993	25.1808	21.4993	134	FALSE	TRUE
chr11	35141475	35141790	Nanog_1k_peak_2742	1001	.	25.5047	105.893	100.126	160	FALSE	FALSE
chr11	35263640	35263770	Nanog_1k_peak_2746	165	.	11.4043	20.0088	16.5374	59	FALSE	TRUE
chr11	35741099	35741270	Nanog_1k_peak_2754	161	.	10.477	19.591	16.138	67	FALSE	TRUE
chr11	36183115	36183338	Nanog_1k_peak_2762	225	.	13.7911	26.2548	22.5334	196	FALSE	FALSE
chr11	36279484	36279698	Nanog_1k_peak_2764	271	.	15.9283	31.0888	27.1945	94	FALSE	TRUE
chr11	36286173	36286394	Nanog_1k_peak_2765	195	.	12.3252	23.2032	19.5984	69	FALSE	FALSE
chr11	36341031	36341271	Nanog_1k_peak_2766	313	.	17.2053	35.4157	31.3795	159	FALSE	TRUE
chr11	36409276	36409458	Nanog_1k_peak_2768	221	.	12.6692	25.8908	22.1828	74	FALSE	TRUE
chr11	36768587	36769018	Nanog_1k_peak_2776	702	.	22.4321	75.4356	70.2735	182	FALSE	FALSE
chr11	37880564	37880701	Nanog_1k_peak_2784	165	.	11.4043	20.0088	16.5374	73	FALSE	TRUE
chr11	37997502	37997701	Nanog_1k_peak_2786	323	.	17.4743	36.4645	32.3938	113	TRUE	FALSE
chr11	38144672	38144890	Nanog_1k_peak_2789	256	.	14.474	29.5101	25.671	56	FALSE	FALSE
chr11	38553768	38553977	Nanog_1k_peak_2796	210	.	12.6342	24.7304	21.0659	100	FALSE	TRUE
chr11	39564120	39564638	Nanog_1k_peak_2800	307	.	14.1586	34.7586	30.7431	246	FALSE	TRUE
chr11	39958873	39959088	Nanog_1k_peak_2803	150	.	10.7046	18.4134	15.0134	105	FALSE	TRUE
chr11	40058518	40058634	Nanog_1k_peak_2804	151	.	10.8849	18.607	15.1982	71	FALSE	TRUE
chr11	40692851	40693096	Nanog_1k_peak_2812	439	.	16.0807	48.4089	43.9816	87	FALSE	TRUE
chr11	40727861	40728023	Nanog_1k_peak_2814	140	.	10.1839	17.4464	14.0904	118	FALSE	FALSE
chr11	41265798	41265999	Nanog_1k_peak_2824	252	.	15.0636	29.0326	25.2106	78	FALSE	TRUE
chr11	41278957	41279201	Nanog_1k_peak_2826	158	.	10.5771	19.2926	15.8529	103	TRUE	TRUE
chr11	41476151	41476297	Nanog_1k_peak_2827	245	.	14.9195	28.369	24.5713	78	FALSE	TRUE
chr11	41831877	41832024	Nanog_1k_peak_2830	212	.	10.0804	24.9579	21.2849	43	TRUE	TRUE
chr11	41853858	41854051	Nanog_1k_peak_2832	147	.	10.6366	18.088	14.7028	56	FALSE	TRUE
chr11	42643142	42643315	Nanog_1k_peak_2844	174	.	11.2854	20.9507	17.4394	134	FALSE	FALSE
chr11	42918930	42919123	Nanog_1k_peak_2848	201	.	13.0632	23.7799	20.1516	76	FALSE	TRUE
chr11	43084413	43084850	Nanog_1k_peak_2851	184	.	11.3337	22.0212	18.4651	379	FALSE	TRUE
chr11	43224771	43225051	Nanog_1k_peak_2856	412	.	19.2572	45.577	41.2354	168	FALSE	FALSE
chr11	43372796	43372948	Nanog_1k_peak_2858	205	.	13.2463	24.1451	20.5028	52	FALSE	TRUE
chr11	43601604	43601801	Nanog_1k_peak_2864	225	.	12.9059	26.2871	22.5648	74	TRUE	TRUE
chr11	43760553	43760688	Nanog_1k_peak_2868	141	.	10.4021	17.5356	14.1757	67	FALSE	TRUE
chr11	44226787	44226940	Nanog_1k_peak_2870	266	.	15.3618	30.5138	26.64	99	FALSE	FALSE
chr11	44503509	44503779	Nanog_1k_peak_2871	358	.	18.476	40.0644	35.8844	130	FALSE	FALSE
chr11	44586882	44587001	Nanog_1k_peak_2873	146	.	10.479	17.9886	14.608	29	FALSE	TRUE
chr11	45287422	45287539	Nanog_1k_peak_2878	173	.	11.852	20.8857	17.3771	58	FALSE	TRUE
chr11	45303956	45304156	Nanog_1k_peak_2880	165	.	11.0213	20.0492	16.5764	51	FALSE	TRUE
chr12	290422	290661	Nanog_1k_peak_2885	321	.	12.0314	36.2168	32.1541	87	TRUE	FALSE
chr12	850489	850700	Nanog_1k_peak_2889	206	.	12.3611	24.2691	20.622	127	FALSE	TRUE
chr12	1054348	1054500	Nanog_1k_peak_2895	152	.	10.8746	18.638	15.2269	50	FALSE	TRUE
chr12	1189718	1189876	Nanog_1k_peak_2897	184	.	12.1244	21.9996	18.4445	60	TRUE	TRUE
chr12	1202565	1202798	Nanog_1k_peak_2898	154	.	10.5895	18.8844	15.4632	79	FALSE	TRUE
chr12	1448423	1448542	Nanog_1k_peak_2901	142	.	10.0967	17.6383	14.2734	83	FALSE	TRUE
chr12	1468845	1469075	Nanog_1k_peak_2902	157	.	10.9607	19.1774	15.7425	84	TRUE	TRUE
chr12	2165134	2165286	Nanog_1k_peak_2912	159	.	10.8989	19.4232	15.9775	109	FALSE	TRUE
chr12	3684389	3684583	Nanog_1k_peak_2920	140	.	10.313	17.4388	14.0834	66	TRUE	TRUE
chr12	3864779	3864885	Nanog_1k_peak_2926	192	.	12.6915	22.7921	19.2042	56	FALSE	FALSE
chr12	3954542	3954644	Nanog_1k_peak_2928	329	.	17.4836	37.079	32.9887	44	TRUE	TRUE
chr12	4256598	4256811	Nanog_1k_peak_2931	181	.	11.9708	21.7204	18.1772	38	FALSE	TRUE
chr12	4526517	4526971	Nanog_1k_peak_2934	168	.	10.9379	20.3626	16.8765	271	TRUE	TRUE
chr12	4631029	4631337	Nanog_1k_peak_2935	250	.	12.2612	28.847	25.0321	222	FALSE	TRUE
chr12	4698290	4698486	Nanog_1k_peak_2937	239	.	13.3944	27.6842	23.9109	94	FALSE	TRUE
chr12	5591880	5592179	Nanog_1k_peak_2946	167	.	11.3408	20.2097	16.7304	232	TRUE	TRUE
chr12	5716098	5716539	Nanog_1k_peak_2951	482	.	13.9066	52.8378	48.2796	247	TRUE	FALSE
chr12	6119824	6119995	Nanog_1k_peak_2960	146	.	10.479	17.9886	14.608	66	TRUE	TRUE
chr12	6394411	6394587	Nanog_1k_peak_2969	240	.	10.9894	27.8276	24.0493	88	TRUE	TRUE
chr12	6404628	6404988	Nanog_1k_peak_2973	345	.	14.0293	38.701	34.5619	155	FALSE	TRUE
chr12	6416264	6416741	Nanog_1k_peak_2975	226	.	12.281	26.4152	22.6878	254	TRUE	TRUE
chr12	6520251	6520555	Nanog_1k_peak_2978	153	.	10.7108	18.7224	15.3078	247	FALSE	TRUE
chr12	6529117	6529387	Nanog_1k_peak_2979	272	.	12.457	31.1108	27.2157	82	FALSE	TRUE
chr12	6787512	6787726	Nanog_1k_peak_2985	202	.	12.7154	23.8855	20.2526	89	FALSE	TRUE
chr12	6805947	6806274	Nanog_1k_peak_2986	260	.	13.6399	29.9231	26.0689	183	FALSE	FALSE
chr12	7015566	7015849	Nanog_1k_peak_2990	365	.	13.6011	40.7078	36.5081	126	TRUE	TRUE
chr12	7051119	7051551	Nanog_1k_peak_2993	228	.	11.3252	26.5998	22.866	172	FALSE	TRUE
chr12	7936955	7937116	Nanog_1k_peak_3000	134	.	10.042	16.7609	13.4382	58	TRUE	TRUE
chr12	8140610	8140883	Nanog_1k_peak_3002	308	.	12.6818	34.8218	30.8043	104	TRUE	FALSE
chr12	8145013	8145148	Nanog_1k_peak_3004	250	.	10.5475	28.8165	25.0023	73	FALSE	FALSE
chr12	8145772	8145949	Nanog_1k_peak_3005	211	.	10.6722	24.856	21.1868	103	FALSE	TRUE
chr12	8822475	8822749	Nanog_1k_peak_3011	315	.	15.4627	35.6122	31.5694	125	FALSE	FALSE
chr12	8944157	8944337	Nanog_1k_peak_3014	292	.	11.1701	33.1653	29.2018	87	TRUE	FALSE
chr12	8979209	8979639	Nanog_1k_peak_3018	364	.	15.9322	40.654	36.4557	218	FALSE	TRUE
chr12	9013417	9013683	Nanog_1k_peak_3019	139	.	10.0807	17.2599	13.9129	134	FALSE	FALSE
chr12	9036418	9036700	Nanog_1k_peak_3021	162	.	11.0605	19.7083	16.2502	213	FALSE	TRUE
chr12	9437006	9437395	Nanog_1k_peak_3028	480	.	17.0653	52.5991	48.0472	291	TRUE	FALSE
chr12	9464342	9464540	Nanog_1k_peak_3029	214	.	12.2209	25.142	21.4619	51	FALSE	TRUE
chr12	10063363	10063488	Nanog_1k_peak_3036	153	.	10.9101	18.809	15.391	60	FALSE	FALSE
chr12	10381301	10381459	Nanog_1k_peak_3041	276	.	15.3048	31.511	27.6032	85	FALSE	TRUE
chr12	10470209	10470532	Nanog_1k_peak_3044	193	.	11.2456	22.9529	19.3587	148	TRUE	TRUE
chr12	10674397	10674628	Nanog_1k_peak_3048	409	.	19.1015	45.3133	40.9797	100	TRUE	TRUE
chr12	10705241	10705434	Nanog_1k_peak_3050	213	.	11.7831	24.9896	21.3152	66	TRUE	TRUE
chr12	10706574	10706791	Nanog_1k_peak_3051	199	.	11.2479	23.5182	19.9005	131	FALSE	TRUE
chr12	11030476	11030618	Nanog_1k_peak_3054	214	.	13.6003	25.1284	21.4491	73	TRUE	TRUE
chr12	11052534	11052838	Nanog_1k_peak_3055	218	.	11.4198	25.5583	21.863	203	TRUE	TRUE
chr12	11080614	11080806	Nanog_1k_peak_3059	320	.	14.5159	36.0657	32.0075	59	FALSE	FALSE
chr12	11306367	11306499	Nanog_1k_peak_3060	231	.	14.1478	26.9065	23.1618	75	FALSE	TRUE
chr12	11331540	11331883	Nanog_1k_peak_3061	166	.	10.7954	20.1232	16.6479	149	FALSE	TRUE
chr12	11456602	11456758	Nanog_1k_peak_3063	326	.	17.6453	36.7687	32.6882	68	FALSE	TRUE
chr12	11996672	11996872	Nanog_1k_peak_3070	167	.	11.099	20.183	16.705	92	TRUE	TRUE
chr12	12060222	12060466	Nanog_1k_peak_3071	318	.	17.73	35.8599	31.8089	39	FALSE	FALSE
chr12	12219760	12219965	Nanog_1k_peak_3073	334	.	18.6149	37.5772	33.4713	113	FALSE	FALSE
chr12	12358656	12358873	Nanog_1k_peak_3074	717	.	22.7669	76.9702	71.7683	100	TRUE	FALSE
chr12	12396852	12397211	Nanog_1k_peak_3076	205	.	10.9759	24.2108	20.566	211	TRUE	TRUE
chr12	12984115	12984221	Nanog_1k_peak_3091	230	.	11.0643	26.7456	23.0067	52	FALSE	TRUE
chr12	12988848	12989220	Nanog_1k_peak_3093	305	.	11.5437	34.5702	30.561	161	TRUE	TRUE
chr12	13151899	13152102	Nanog_1k_peak_3097	228	.	12.3715	26.5669	22.8342	136	TRUE	FALSE
chr12	13728870	13729338	Nanog_1k_peak_3103	942	.	16.9046	99.884	94.2289	296	TRUE	FALSE
chr12	14212389	14212604	Nanog_1k_peak_3107	176	.	10.2069	21.2171	17.6945	108	FALSE	FALSE
chr12	14390826	14390944	Nanog_1k_peak_3111	266	.	15.9645	30.5016	26.6283	74	FALSE	FALSE
chr12	14680578	14680785	Nanog_1k_peak_3112	171	.	11.0842	20.6094	17.1124	48	FALSE	TRUE
chr12	15152865	15153090	Nanog_1k_peak_3113	212	.	13.0663	24.9673	21.2939	184	FALSE	TRUE
chr12	15265957	15266065	Nanog_1k_peak_3114	418	.	21.8201	46.2123	41.8531	47	FALSE	FALSE
chr12	15766974	15767174	Nanog_1k_peak_3119	154	.	10.5645	18.8413	15.4218	128	FALSE	TRUE
chr12	16004814	16005007	Nanog_1k_peak_3124	276	.	13.0939	31.5758	27.6659	68	TRUE	TRUE
chr12	17066915	17067244	Nanog_1k_peak_3144	383	.	17.9108	42.5654	38.311	221	FALSE	FALSE
chr12	17081002	17081257	Nanog_1k_peak_3147	223	.	12.7733	26.065	22.3511	136	FALSE	TRUE
chr12	17754772	17754962	Nanog_1k_peak_3158	246	.	14.4614	28.4051	24.6057	104	FALSE	FALSE
chr12	18072370	18072658	Nanog_1k_peak_3163	230	.	11.1122	26.831	23.0891	231	TRUE	TRUE
chr12	18357915	18358076	Nanog_1k_peak_3166	207	.	11.4492	24.4297	20.7771	102	FALSE	TRUE
chr12	18408588	18408738	Nanog_1k_peak_3167	148	.	10.5906	18.1975	14.8074	44	FALSE	TRUE
chr12	18886753	18886982	Nanog_1k_peak_3171	182	.	11.1717	21.7513	18.207	162	TRUE	FALSE
chr12	18920964	18921115	Nanog_1k_peak_3174	159	.	10.3462	19.3734	15.9301	76	FALSE	TRUE
chr12	18940944	18941162	Nanog_1k_peak_3175	220	.	12.8985	25.7151	22.014	72	FALSE	TRUE
chr12	19113220	19113520	Nanog_1k_peak_3178	221	.	11.2553	25.8742	22.167	123	TRUE	TRUE
chr12	19134924	19135220	Nanog_1k_peak_3179	227	.	12.6848	26.4966	22.7664	124	FALSE	TRUE
chr12	19153217	19153405	Nanog_1k_peak_3181	288	.	14.5806	32.7894	28.8396	118	FALSE	TRUE
chr12	19865401	19865680	Nanog_1k_peak_3196	197	.	11.8489	23.4101	19.7968	113	FALSE	TRUE
chr12	20049239	20049327	Nanog_1k_peak_3202	151	.	10.3927	18.5463	15.1402	40	FALSE	TRUE
chr12	20217928	20218224	Nanog_1k_peak_3208	170	.	10.7296	20.5037	17.0117	225	FALSE	TRUE
chr12	20329629	20329903	Nanog_1k_peak_3210	224	.	12.1258	26.1547	22.4374	147	FALSE	FALSE
chr12	20434991	20435330	Nanog_1k_peak_3214	273	.	13.291	31.2608	27.3609	149	FALSE	TRUE
chr12	20743483	20743762	Nanog_1k_peak_3219	484	.	20.9326	53.0366	48.473	171	TRUE	FALSE
chr12	21292369	21292707	Nanog_1k_peak_3227	232	.	13.3208	26.9845	23.2365	199	FALSE	TRUE
chr12	21672144	21672295	Nanog_1k_peak_3234	158	.	10.8199	19.2847	15.8459	77	FALSE	TRUE
chr12	22004433	22004622	Nanog_1k_peak_3238	141	.	10.2363	17.5417	14.1814	54	TRUE	TRUE
chr12	22238043	22238177	Nanog_1k_peak_3240	141	.	10.4021	17.5356	14.1757	81	FALSE	TRUE
chr12	22259708	22259919	Nanog_1k_peak_3241	214	.	11.8696	25.1344	21.4547	57	TRUE	TRUE
chr12	22260502	22260744	Nanog_1k_peak_3242	164	.	10.062	19.9096	16.4429	75	FALSE	TRUE
chr12	22604284	22604506	Nanog_1k_peak_3248	154	.	10.8204	18.921	15.4978	122	TRUE	FALSE
chr12	23328067	23328344	Nanog_1k_peak_3258	227	.	13.8962	26.4454	22.717	46	TRUE	TRUE
chr12	23365837	23365988	Nanog_1k_peak_3259	222	.	13.6194	25.9457	22.2358	84	TRUE	TRUE
chr12	23407259	23407557	Nanog_1k_peak_3260	224	.	13.1835	26.1972	22.478	175	TRUE	TRUE
chr12	23420689	23421048	Nanog_1k_peak_3261	578	.	11.4822	62.6555	57.8279	144	FALSE	FALSE
chr12	23437823	23438259	Nanog_1k_peak_3265	420	.	15.8426	46.4431	42.0772	270	FALSE	FALSE
chr12	23595604	23596218	Nanog_1k_peak_3266	202	.	10.7993	23.909	20.2753	395	FALSE	TRUE
chr12	23731443	23731694	Nanog_1k_peak_3267	345	.	16.4931	38.7367	34.5966	111	TRUE	FALSE
chr12	24059627	24059851	Nanog_1k_peak_3270	299	.	14.882	33.959	29.969	121	TRUE	FALSE
chr12	24291162	24291450	Nanog_1k_peak_3275	315	.	10.5791	35.6412	31.5979	124	FALSE	TRUE
chr12	24343039	24343589	Nanog_1k_peak_3280	382	.	11.8759	42.5163	38.263	348	FALSE	FALSE
chr12	24761305	24761520	Nanog_1k_peak_3285	140	.	10.1579	17.3993	14.0454	130	FALSE	TRUE
chr12	24905663	24905873	Nanog_1k_peak_3291	431	.	17.2763	47.5164	43.1169	142	FALSE	TRUE
chr12	24918192	24918460	Nanog_1k_peak_3293	190	.	11.7223	22.6713	19.0881	148	TRUE	TRUE
chr12	24925534	24925648	Nanog_1k_peak_3294	303	.	16.6299	34.3942	30.3904	73	TRUE	TRUE
chr12	25040910	25041233	Nanog_1k_peak_3298	298	.	14.0047	33.8139	29.8285	129	TRUE	FALSE
chr12	25260636	25260915	Nanog_1k_peak_3303	205	.	11.3288	24.2274	20.5818	181	FALSE	TRUE
chr12	25432522	25432722	Nanog_1k_peak_3306	316	.	14.3071	35.7032	31.6578	132	FALSE	TRUE
chr12	25482769	25483049	Nanog_1k_peak_3311	322	.	15.465	36.3017	32.2363	228	FALSE	FALSE
chr12	25508311	25508606	Nanog_1k_peak_3314	183	.	11.5611	21.8961	18.3455	197	TRUE	TRUE
chr12	25544306	25544685	Nanog_1k_peak_3318	203	.	12.9961	23.9783	20.3422	234	FALSE	TRUE
chr12	25599773	25600025	Nanog_1k_peak_3321	469	.	10.8328	51.4389	46.9198	148	TRUE	TRUE
chr12	26475763	26475938	Nanog_1k_peak_3342	226	.	10.877	26.41	22.6828	67	FALSE	TRUE
chr12	26480222	26480429	Nanog_1k_peak_3343	359	.	14.0375	40.131	35.9488	81	TRUE	TRUE
chr12	26486079	26486343	Nanog_1k_peak_3344	267	.	14.7662	30.5898	26.7136	91	FALSE	TRUE
chr12	26653738	26653980	Nanog_1k_peak_3347	178	.	11.7916	21.398	17.8683	175	FALSE	TRUE
chr12	26849135	26849271	Nanog_1k_peak_3350	138	.	10.0299	17.1687	13.8257	42	FALSE	TRUE
chr12	26876996	26877088	Nanog_1k_peak_3353	146	.	10.3186	18.0251	14.6429	47	FALSE	TRUE
chr12	27121188	27121416	Nanog_1k_peak_3361	176	.	10.5	21.1659	17.6455	169	FALSE	TRUE
chr12	27285483	27285819	Nanog_1k_peak_3370	528	.	20.2037	57.5033	52.816	197	FALSE	FALSE
chr12	27535482	27535709	Nanog_1k_peak_3373	297	.	12.8194	33.7387	29.7556	97	FALSE	TRUE
chr12	27552186	27552388	Nanog_1k_peak_3379	327	.	10.2945	36.8118	32.73	91	TRUE	TRUE
chr12	27553085	27553705	Nanog_1k_peak_3380	565	.	15.0014	61.3924	56.5968	188	FALSE	FALSE
chr12	27893433	27893887	Nanog_1k_peak_3384	343	.	14.2766	38.4465	34.3148	201	FALSE	TRUE
chr12	27925540	27926011	Nanog_1k_peak_3387	335	.	15.8618	37.6693	33.5611	323	FALSE	FALSE
chr12	28088499	28088631	Nanog_1k_peak_3394	178	.	11.7916	21.398	17.8683	79	FALSE	TRUE
chr12	28498794	28499104	Nanog_1k_peak_3398	234	.	12.3737	27.1753	23.4205	66	TRUE	TRUE
chr12	28570935	28571091	Nanog_1k_peak_3401	168	.	10.5989	20.2866	16.8041	106	FALSE	TRUE
chr12	28701711	28701959	Nanog_1k_peak_3405	207	.	13.2382	24.4327	20.78	132	FALSE	TRUE
chr12	28796054	28796295	Nanog_1k_peak_3411	242	.	10.7467	27.9851	24.2014	64	FALSE	TRUE
chr12	28821984	28822342	Nanog_1k_peak_3412	226	.	11.1893	26.3615	22.6365	303	FALSE	FALSE
chr12	28825737	28825849	Nanog_1k_peak_3413	210	.	10.9012	24.6675	21.0055	55	FALSE	TRUE
chr12	28886734	28886998	Nanog_1k_peak_3416	363	.	15.4762	40.5858	36.3896	197	FALSE	FALSE
chr12	28999895	29000075	Nanog_1k_peak_3420	172	.	10.547	20.714	17.2124	82	FALSE	TRUE
chr12	29019118	29019379	Nanog_1k_peak_3422	223	.	13.0967	26.05	22.3367	196	FALSE	TRUE
chr12	29031433	29031768	Nanog_1k_peak_3423	239	.	12.3334	27.7212	23.9466	173	TRUE	TRUE
chr12	29055011	29055382	Nanog_1k_peak_3424	492	.	16.5033	53.8663	49.2777	298	FALSE	FALSE
chr12	29123938	29124056	Nanog_1k_peak_3427	136	.	10.0978	16.9497	13.6173	69	FALSE	TRUE
chr12	29234687	29234908	Nanog_1k_peak_3430	275	.	11.2395	31.4088	27.5045	94	FALSE	FALSE
chr12	29236058	29236276	Nanog_1k_peak_3431	471	.	15.8027	51.6953	47.168	126	TRUE	FALSE
chr12	29590638	29591230	Nanog_1k_peak_3437	372	.	12.6169	41.4734	37.2511	126	TRUE	FALSE
chr12	29984305	29984529	Nanog_1k_peak_3450	252	.	13.1426	29.0878	25.2638	21	FALSE	TRUE
chr12	30060761	30061071	Nanog_1k_peak_3452	331	.	16.0523	37.2936	33.1954	37	FALSE	FALSE
chr12	31035369	31035690	Nanog_1k_peak_3465	173	.	11.2599	20.9072	17.3978	79	TRUE	TRUE
chr12	31051778	31051975	Nanog_1k_peak_3466	153	.	10.9811	18.8134	15.3951	154	TRUE	TRUE
chr12	31460723	31460964	Nanog_1k_peak_3475	177	.	11.4941	21.3071	17.7812	120	FALSE	TRUE
chr12	31739210	31739535	Nanog_1k_peak_3478	262	.	13.7439	30.0975	26.2377	215	FALSE	FALSE
chr12	32066460	32066686	Nanog_1k_peak_3483	182	.	11.794	21.8242	18.277	104	FALSE	TRUE
chr12	32172870	32173159	Nanog_1k_peak_3485	292	.	13.2935	33.2499	29.2834	63	FALSE	TRUE
chr12	32295497	32295604	Nanog_1k_peak_3487	214	.	11.5222	25.1384	21.4585	62	FALSE	TRUE
chr12	32296946	32297087	Nanog_1k_peak_3488	189	.	10.6871	22.5776	18.9984	102	FALSE	TRUE
chr12	32441542	32441764	Nanog_1k_peak_3491	169	.	11.2577	20.4576	16.9672	120	TRUE	TRUE
chr12	32464535	32464686	Nanog_1k_peak_3492	158	.	10.8461	19.3306	15.8895	46	FALSE	TRUE
chr12	32486178	32486513	Nanog_1k_peak_3494	474	.	17.5932	52.0025	47.4673	173	TRUE	FALSE
chr12	33094439	33094627	Nanog_1k_peak_3507	171	.	11.3387	20.5987	17.102	59	TRUE	TRUE
chr12	33290236	33290717	Nanog_1k_peak_3509	258	.	12.0022	29.6594	25.8147	80	FALSE	TRUE
chr12	33318060	33318274	Nanog_1k_peak_3510	402	.	13.4096	44.5534	40.2409	125	FALSE	TRUE
chr12	33321472	33321665	Nanog_1k_peak_3511	368	.	11.833	41.0885	36.8773	125	FALSE	TRUE
chr12	33592490	33592591	Nanog_1k_peak_3520	144	.	10.528	17.8186	14.446	42	FALSE	TRUE
chr12	33659325	33659479	Nanog_1k_peak_3522	243	.	14.9766	28.182	24.3911	92	FALSE	TRUE
chr12	34261215	34261330	Nanog_1k_peak_3531	271	.	15.8859	31.0081	27.1175	64	FALSE	TRUE
chr12	34468684	34468896	Nanog_1k_peak_3535	173	.	10.3293	20.8818	17.3737	139	FALSE	TRUE
chr12	34622941	34623106	Nanog_1k_peak_3537	164	.	11.1989	19.9547	16.4861	84	FALSE	TRUE
chr12	34731116	34731512	Nanog_1k_peak_3546	469	.	12.21	51.4353	46.9163	81	FALSE	FALSE
chr12	34906745	34906828	Nanog_1k_peak_3558	207	.	13.2031	24.3662	20.7153	32	FALSE	TRUE
chr12	35018839	35019139	Nanog_1k_peak_3561	182	.	12.0012	21.7754	18.23	204	TRUE	TRUE
chr12	35105655	35105804	Nanog_1k_peak_3562	240	.	10.6385	27.7807	24.004	76	FALSE	TRUE
chr12	35106157	35106390	Nanog_1k_peak_3563	250	.	10.8966	28.8798	25.0634	117	TRUE	TRUE
chr12	35215906	35216142	Nanog_1k_peak_3565	158	.	10.7938	19.2392	15.802	180	FALSE	TRUE
chr12	35310621	35310723	Nanog_1k_peak_3571	149	.	10.4979	18.3418	14.9449	41	FALSE	TRUE
chr12	35885338	35885493	Nanog_1k_peak_3577	323	.	17.4743	36.4645	32.3938	84	FALSE	FALSE
chr12	36521775	36522144	Nanog_1k_peak_3585	196	.	11.4178	23.2395	19.6333	179	FALSE	TRUE
chr12	37446885	37447305	Nanog_1k_peak_3601	932	.	22.3279	98.8857	93.2504	187	FALSE	FALSE
chr12	37678188	37678361	Nanog_1k_peak_3606	210	.	13.3807	24.704	21.0406	84	FALSE	FALSE
chr12	38462112	38462424	Nanog_1k_peak_3615	605	.	22.2911	65.4385	60.5331	80	TRUE	FALSE
chr12	38508664	38509004	Nanog_1k_peak_3617	502	.	19.1663	54.8435	50.2279	142	TRUE	FALSE
chr12	38815471	38815701	Nanog_1k_peak_3623	315	.	17.2907	35.5692	31.528	109	TRUE	FALSE
chr12	39630471	39630658	Nanog_1k_peak_3632	225	.	14.1821	26.2952	22.5726	56	TRUE	TRUE
chr12	40624538	40624638	Nanog_1k_peak_3646	153	.	10.738	18.7716	15.355	46	FALSE	TRUE
chr12	40823609	40823888	Nanog_1k_peak_3652	291	.	15.1413	33.0814	29.1211	146	FALSE	TRUE
chr12	41345516	41345711	Nanog_1k_peak_3667	180	.	12.1078	21.6366	18.0971	59	TRUE	TRUE
chr12	41482028	41482358	Nanog_1k_peak_3670	199	.	12.9557	23.5687	19.9492	192	FALSE	TRUE
chr12	41775405	41775696	Nanog_1k_peak_3673	231	.	12.2217	26.919	23.1738	142	FALSE	TRUE
chr12	42360377	42360518	Nanog_1k_peak_3679	200	.	11.3299	23.6553	20.0319	70	FALSE	TRUE
chr12	42368684	42369042	Nanog_1k_peak_3680	171	.	10.5065	20.6468	17.1483	199	TRUE	TRUE
chr12	42533670	42534278	Nanog_1k_peak_3688	259	.	13.2106	29.834	25.983	120	FALSE	TRUE
chr12	43234057	43234171	Nanog_1k_peak_3694	134	.	10.0184	16.7567	13.4342	54	FALSE	TRUE
chr12	43442525	43442835	Nanog_1k_peak_3698	393	.	15.9423	43.6224	39.3362	186	FALSE	FALSE
chr12	43656511	43656771	Nanog_1k_peak_3705	577	.	23.6063	62.5354	57.7119	154	FALSE	FALSE
chr12	44047556	44048013	Nanog_1k_peak_3709	277	.	15.0483	31.6693	27.7566	79	FALSE	TRUE
chr12	44361633	44362093	Nanog_1k_peak_3713	422	.	18.0786	46.6006	42.2302	320	FALSE	FALSE
chr12	44626372	44626689	Nanog_1k_peak_3715	157	.	10.9892	19.2298	15.7933	125	FALSE	TRUE
chr12	44637020	44637227	Nanog_1k_peak_3716	473	.	22.5176	51.904	47.3719	63	TRUE	FALSE
chr12	44707906	44708253	Nanog_1k_peak_3717	347	.	17.3971	38.8764	34.7324	103	FALSE	FALSE
chr12	46543381	46543557	Nanog_1k_peak_3738	149	.	10.7593	18.3421	14.9451	51	FALSE	TRUE
chr12	46622963	46623356	Nanog_1k_peak_3739	161	.	10.77	19.6197	16.1651	90	FALSE	TRUE
chr12	46650949	46651428	Nanog_1k_peak_3740	297	.	13.9584	33.7343	29.7516	373	TRUE	FALSE
chr12	47651143	47651426	Nanog_1k_peak_3751	608	.	21.0278	65.7693	60.8546	97	FALSE	FALSE
chr12	47660405	47660835	Nanog_1k_peak_3752	1186	.	24.4257	124.609	118.622	194	FALSE	FALSE
chr12	47670460	47670804	Nanog_1k_peak_3753	693	.	13.7996	74.4878	69.3481	171	FALSE	FALSE
chr12	47674842	47675226	Nanog_1k_peak_3754	490	.	11.7709	53.5922	49.0112	144	FALSE	FALSE
chr12	47912591	47912739	Nanog_1k_peak_3756	180	.	12.1939	21.5865	18.0492	69	TRUE	TRUE
chr12	48152711	48153193	Nanog_1k_peak_3760	311	.	13.6365	35.2109	31.1809	297	FALSE	FALSE
chr12	48153292	48153605	Nanog_1k_peak_3761	273	.	12.5308	31.242	27.3429	54	FALSE	TRUE
chr12	48187378	48187588	Nanog_1k_peak_3763	352	.	18.4557	39.3992	35.2393	129	FALSE	TRUE
chr12	48197413	48198149	Nanog_1k_peak_3764	353	.	12.6431	39.4801	35.3174	212	FALSE	FALSE
chr12	48204735	48204936	Nanog_1k_peak_3765	210	.	10.9183	24.697	21.0339	95	FALSE	TRUE
chr12	48339837	48340163	Nanog_1k_peak_3767	494	.	19.6412	54.051	49.4568	161	FALSE	FALSE
chr12	48413121	48413280	Nanog_1k_peak_3769	158	.	11.0466	19.3359	15.8945	108	FALSE	TRUE
chr12	48671706	48671937	Nanog_1k_peak_3771	260	.	14.3865	29.9461	26.0911	109	FALSE	TRUE
chr12	48841216	48841393	Nanog_1k_peak_3774	155	.	10.391	18.979	15.5529	114	TRUE	TRUE
chr13	186494	186594	Nanog_1k_peak_3778	299	.	16.9836	33.9776	29.9872	33	FALSE	FALSE
chr13	316936	317199	Nanog_1k_peak_3782	178	.	11.2376	21.3517	17.824	87	FALSE	TRUE
chr13	1181534	1181876	Nanog_1k_peak_3803	423	.	15.6083	46.7567	42.38	112	FALSE	FALSE
chr13	1336416	1336695	Nanog_1k_peak_3809	179	.	10.0155	21.4405	17.9091	226	TRUE	TRUE
chr13	1951110	1951847	Nanog_1k_peak_3815	322	.	10.8947	36.3643	32.297	554	TRUE	FALSE
chr13	3153498	3154027	Nanog_1k_peak_3835	508	.	11.7205	55.4482	50.8169	317	FALSE	FALSE
chr13	3158914	3159236	Nanog_1k_peak_3837	565	.	13.7962	61.3089	56.5159	134	FALSE	FALSE
chr13	3799201	3799445	Nanog_1k_peak_3841	215	.	12.6256	25.2558	21.5716	108	FALSE	TRUE
chr13	3878751	3879013	Nanog_1k_peak_3844	445	.	19.4961	49.0202	44.5745	136	FALSE	FALSE
chr13	4034614	4034863	Nanog_1k_peak_3847	198	.	12.7299	23.4879	19.8714	37	FALSE	FALSE
chr13	4132883	4133396	Nanog_1k_peak_3848	210	.	12.2876	24.6896	21.0267	219	FALSE	TRUE
chr13	4269287	4269421	Nanog_1k_peak_3852	185	.	12.4281	22.1022	18.5419	99	TRUE	TRUE
chr13	4406727	4406926	Nanog_1k_peak_3856	220	.	13.5184	25.7651	22.0617	69	FALSE	TRUE
chr13	5454945	5455099	Nanog_1k_peak_3868	142	.	10.3993	17.6092	14.2458	49	TRUE	TRUE
chr13	5488864	5489420	Nanog_1k_peak_3872	384	.	16.6694	42.6642	38.4068	295	FALSE	FALSE
chr13	5901972	5902280	Nanog_1k_peak_3877	518	.	19.6405	56.5065	51.8468	138	FALSE	FALSE
chr13	5935381	5935867	Nanog_1k_peak_3878	395	.	16.5069	43.8747	39.5819	304	FALSE	FALSE
chr13	6079823	6079927	Nanog_1k_peak_3880	158	.	10.8199	19.2847	15.8459	48	FALSE	TRUE
chr13	6176623	6176904	Nanog_1k_peak_3882	265	.	14.977	30.3744	26.5048	41	FALSE	FALSE
chr13	7025257	7025602	Nanog_1k_peak_3893	193	.	10.9122	22.956	19.3614	262	FALSE	FALSE
chr13	7048724	7048834	Nanog_1k_peak_3897	150	.	10.0591	18.4239	15.0235	59	FALSE	TRUE
chr13	7049351	7049559	Nanog_1k_peak_3898	175	.	11.0474	21.0333	17.5184	101	FALSE	TRUE
chr13	7724574	7724906	Nanog_1k_peak_3903	154	.	10.0331	18.8541	15.434	163	TRUE	TRUE
chr13	8446315	8446418	Nanog_1k_peak_3910	152	.	10.8506	18.6935	15.2801	26	FALSE	TRUE
chr13	8604655	8604898	Nanog_1k_peak_3911	155	.	10.8761	19.0224	15.5949	153	FALSE	TRUE
chr13	8613670	8613854	Nanog_1k_peak_3912	184	.	12.2738	21.9582	18.4047	33	TRUE	FALSE
chr13	8892638	8892799	Nanog_1k_peak_3916	147	.	10.6366	18.088	14.7028	71	FALSE	TRUE
chr13	9326492	9326684	Nanog_1k_peak_3919	195	.	11.3742	23.167	19.5634	116	FALSE	TRUE
chr13	9357391	9357626	Nanog_1k_peak_3922	436	.	19.394	48.0734	43.6558	117	FALSE	FALSE
chr13	9362968	9363252	Nanog_1k_peak_3923	841	.	21.4424	89.6109	84.1473	79	TRUE	FALSE
chr13	10093832	10094244	Nanog_1k_peak_3928	515	.	18.9958	56.1714	51.5203	264	TRUE	FALSE
chr13	10231538	10231687	Nanog_1k_peak_3937	223	.	12.4168	26.0489	22.3357	65	TRUE	TRUE
chr13	10254508	10254769	Nanog_1k_peak_3938	298	.	13.6265	33.8339	29.8479	112	FALSE	FALSE
chr13	10261497	10261764	Nanog_1k_peak_3939	392	.	10.953	43.4899	39.2076	61	FALSE	TRUE
chr13	11008589	11008768	Nanog_1k_peak_3947	223	.	13.4356	26.1034	22.3881	86	TRUE	TRUE
chr13	11480689	11481140	Nanog_1k_peak_3949	296	.	14.6626	33.5891	29.6115	336	FALSE	FALSE
chr13	11756046	11756233	Nanog_1k_peak_3953	165	.	11.227	20.005	16.5343	65	TRUE	FALSE
chr13	12494530	12494656	Nanog_1k_peak_3958	163	.	11.2825	19.7772	16.3163	57	FALSE	TRUE
chr13	12671399	12671515	Nanog_1k_peak_3959	256	.	15.0448	29.4482	25.6113	45	FALSE	TRUE
chr13	12695840	12696169	Nanog_1k_peak_3960	183	.	10.963	21.9355	18.3837	202	FALSE	FALSE
chr13	12931396	12931658	Nanog_1k_peak_3965	404	.	16.9903	44.7197	40.4016	220	FALSE	FALSE
chr13	12952031	12952314	Nanog_1k_peak_3968	153	.	10.7108	18.7224	15.3078	39	FALSE	TRUE
chr13	13029753	13030022	Nanog_1k_peak_3969	526	.	17.8823	57.3537	52.6715	143	TRUE	FALSE
chr13	13944695	13945155	Nanog_1k_peak_3975	416	.	18.6025	45.9671	41.6149	375	FALSE	FALSE
chr13	14019867	14020177	Nanog_1k_peak_3976	239	.	13.7328	27.6816	23.9085	165	FALSE	TRUE
chr13	14069877	14070048	Nanog_1k_peak_3977	209	.	13.3448	24.6353	20.9747	77	FALSE	TRUE
chr13	14486603	14486897	Nanog_1k_peak_3986	203	.	11.8485	23.9567	20.3213	89	FALSE	TRUE
chr13	14705348	14705637	Nanog_1k_peak_3990	225	.	12.214	26.3027	22.5797	79	FALSE	TRUE
chr13	14936460	14936765	Nanog_1k_peak_3994	844	.	22.4405	89.9686	84.4982	188	FALSE	FALSE
chr13	14941694	14941983	Nanog_1k_peak_3995	448	.	14.2951	49.3224	44.8669	149	FALSE	FALSE
chr13	14969667	14969997	Nanog_1k_peak_3997	867	.	13.6588	92.2977	86.7838	134	FALSE	FALSE
chr13	14970747	14971148	Nanog_1k_peak_3998	698	.	11.4184	74.9718	69.8232	187	FALSE	TRUE
chr13	14975871	14976058	Nanog_1k_peak_3999	543	.	12.7363	59.1001	54.3672	93	TRUE	FALSE
chr13	14982303	14982991	Nanog_1k_peak_4000	591	.	13.9909	64.0323	59.1663	507	FALSE	FALSE
chr13	15009931	15010085	Nanog_1k_peak_4003	404	.	17.4667	44.7871	40.4675	68	FALSE	TRUE
chr13	15153344	15153555	Nanog_1k_peak_4008	197	.	11.5058	23.3861	19.7737	171	TRUE	TRUE
chr13	15166425	15166724	Nanog_1k_peak_4010	261	.	12.9622	30.0515	26.1929	115	TRUE	FALSE
chr13	15220947	15221413	Nanog_1k_peak_4014	352	.	14.0053	39.3622	35.2037	190	FALSE	FALSE
chr13	15498917	15499028	Nanog_1k_peak_4016	252	.	15.4129	29.036	25.2135	68	FALSE	FALSE
chr13	15581750	15581845	Nanog_1k_peak_4018	153	.	10.7108	18.7224	15.3078	52	FALSE	FALSE
chr13	15701899	15702052	Nanog_1k_peak_4019	149	.	10.2499	18.3026	14.9076	96	TRUE	TRUE
chr13	15854998	15855109	Nanog_1k_peak_4022	191	.	10.1311	22.755	19.1688	68	TRUE	TRUE
chr13	15864696	15864927	Nanog_1k_peak_4023	333	.	16.1443	37.4487	33.3466	89	FALSE	FALSE
chr13	16191039	16191238	Nanog_1k_peak_4027	332	.	11.9203	37.3086	33.21	105	FALSE	TRUE
chr13	16191441	16191659	Nanog_1k_peak_4028	262	.	10.2653	30.0594	26.2007	144	FALSE	FALSE
chr13	16357458	16357703	Nanog_1k_peak_4036	162	.	10.2253	19.6674	16.2106	150	FALSE	TRUE
chr13	16489138	16489611	Nanog_1k_peak_4039	760	.	22.2312	81.3514	76.0542	329	FALSE	FALSE
chr13	16495638	16495931	Nanog_1k_peak_4040	161	.	10.477	19.591	16.138	117	FALSE	TRUE
chr13	16710298	16710436	Nanog_1k_peak_4046	206	.	12.7022	24.3357	20.6859	59	TRUE	TRUE
chr13	16715358	16715646	Nanog_1k_peak_4047	305	.	15.2529	34.5835	30.5739	63	FALSE	TRUE
chr13	16779072	16779320	Nanog_1k_peak_4049	172	.	10.547	20.714	17.2124	144	FALSE	TRUE
chr13	16787381	16787537	Nanog_1k_peak_4050	137	.	10.2189	17.1353	13.7944	81	FALSE	TRUE
chr13	17012560	17013269	Nanog_1k_peak_4053	537	.	15.733	58.483	53.7685	495	TRUE	FALSE
chr13	17082260	17082549	Nanog_1k_peak_4056	340	.	17.7339	38.1375	34.0148	102	TRUE	TRUE
chr13	17291604	17291743	Nanog_1k_peak_4063	194	.	12.2385	23.0531	19.4544	50	FALSE	TRUE
chr13	17466364	17466734	Nanog_1k_peak_4072	891	.	22.1149	94.739	89.1808	170	FALSE	FALSE
chr13	18135088	18135348	Nanog_1k_peak_4081	155	.	10.6398	18.9715	15.5458	214	FALSE	TRUE
chr13	18221667	18222077	Nanog_1k_peak_4085	388	.	13.0501	43.088	38.8176	281	FALSE	FALSE
chr13	18222459	18222687	Nanog_1k_peak_4086	376	.	12.8295	41.9263	37.6892	136	FALSE	TRUE
chr13	18690767	18690980	Nanog_1k_peak_4091	216	.	12.0018	25.3556	21.6672	104	FALSE	TRUE
chr13	19523544	19523702	Nanog_1k_peak_4099	203	.	12.4991	23.9868	20.3504	78	TRUE	FALSE
chr13	19593739	19594022	Nanog_1k_peak_4102	229	.	13.4813	26.7043	22.9666	84	FALSE	TRUE
chr13	19737605	19738240	Nanog_1k_peak_4104	425	.	14.5481	46.9127	42.5314	372	FALSE	FALSE
chr13	20082333	20082648	Nanog_1k_peak_4112	148	.	10.2265	18.2628	14.8696	104	FALSE	TRUE
chr13	20357437	20357859	Nanog_1k_peak_4118	598	.	17.1628	64.7855	59.8989	166	FALSE	FALSE
chr13	20375492	20375703	Nanog_1k_peak_4120	182	.	12.2922	21.7721	18.2268	155	FALSE	FALSE
chr13	20431900	20432232	Nanog_1k_peak_4123	288	.	15.7282	32.8288	28.8779	262	FALSE	TRUE
chr13	20907754	20908013	Nanog_1k_peak_4133	544	.	19.7264	59.1488	54.4142	187	TRUE	FALSE
chr13	20979857	20980234	Nanog_1k_peak_4136	581	.	19.1105	63.0136	58.1757	219	TRUE	FALSE
chr13	21147853	21148006	Nanog_1k_peak_4144	289	.	15.3862	32.8592	28.9075	94	TRUE	TRUE
chr13	21445393	21445766	Nanog_1k_peak_4156	222	.	13.068	26.0015	22.2899	200	FALSE	TRUE
chr13	21556381	21556564	Nanog_1k_peak_4157	282	.	16.0159	32.2025	28.2719	81	TRUE	TRUE
chr13	21661692	21662009	Nanog_1k_peak_4158	218	.	13.0971	25.5195	21.8254	134	FALSE	TRUE
chr13	21673644	21673837	Nanog_1k_peak_4159	251	.	13.7952	28.9505	25.1314	98	FALSE	TRUE
chr13	21907327	21907532	Nanog_1k_peak_4161	194	.	11.3096	23.0594	19.4603	140	FALSE	TRUE
chr13	21999113	21999280	Nanog_1k_peak_4162	146	.	10.3438	18.0695	14.6849	70	TRUE	TRUE
chr13	22295368	22295664	Nanog_1k_peak_4169	483	.	16.0199	52.9011	48.3415	151	TRUE	FALSE
chr13	22476522	22476729	Nanog_1k_peak_4175	208	.	13.2736	24.4997	20.844	131	TRUE	TRUE
chr13	22557119	22557527	Nanog_1k_peak_4178	334	.	14.1844	37.5763	33.4704	323	FALSE	FALSE
chr13	22651782	22652075	Nanog_1k_peak_4183	212	.	12.4155	24.9035	21.2327	45	FALSE	TRUE
chr13	22661684	22662004	Nanog_1k_peak_4185	257	.	11.9846	29.6281	25.7847	269	TRUE	FALSE
chr13	22961515	22961642	Nanog_1k_peak_4190	460	.	22.513	50.4946	46.0036	78	FALSE	FALSE
chr13	23026261	23026563	Nanog_1k_peak_4192	396	.	16.5592	43.9665	39.671	216	FALSE	FALSE
chr13	23090053	23090167	Nanog_1k_peak_4193	227	.	13.9316	26.5099	22.7791	48	TRUE	FALSE
chr13	23285071	23285225	Nanog_1k_peak_4195	194	.	11.331	23.0951	19.4947	73	FALSE	TRUE
chr13	23360032	23360393	Nanog_1k_peak_4198	246	.	14.1711	28.4301	24.6299	186	TRUE	TRUE
chr13	23376373	23376656	Nanog_1k_peak_4199	422	.	15.9507	46.6443	42.2725	163	TRUE	TRUE
chr13	23386490	23386818	Nanog_1k_peak_4201	251	.	12.3595	29.0169	25.1954	117	TRUE	TRUE
chr13	23615955	23616261	Nanog_1k_peak_4204	322	.	15.465	36.3017	32.2363	101	FALSE	TRUE
chr13	24287543	24287679	Nanog_1k_peak_4218	210	.	13.3807	24.704	21.0406	74	FALSE	TRUE
chr13	24321959	24322228	Nanog_1k_peak_4219	163	.	10.5886	19.777	16.3162	69	TRUE	TRUE
chr13	24661307	24661509	Nanog_1k_peak_4230	570	.	18.9621	61.8929	57.0832	63	TRUE	FALSE
chr13	24863095	24863464	Nanog_1k_peak_4239	339	.	16.9304	38.0864	33.9653	128	TRUE	TRUE
chr13	24971820	24972053	Nanog_1k_peak_4250	139	.	10.0807	17.2599	13.9129	119	TRUE	TRUE
chr13	24992686	24993061	Nanog_1k_peak_4252	326	.	10.7652	36.6959	32.6175	74	FALSE	TRUE
chr13	24994504	24995002	Nanog_1k_peak_4253	609	.	16.246	65.9079	60.9898	194	FALSE	TRUE
chr13	25068402	25068636	Nanog_1k_peak_4257	154	.	10.7653	18.821	15.4021	68	FALSE	TRUE
chr13	25198092	25198186	Nanog_1k_peak_4259	239	.	14.6009	27.7556	23.9799	53	FALSE	TRUE
chr13	25505290	25505424	Nanog_1k_peak_4264	143	.	10.3428	17.7365	14.3671	82	TRUE	TRUE
chr13	25549270	25549395	Nanog_1k_peak_4266	235	.	13.857	27.3498	23.5884	65	FALSE	FALSE
chr13	25870091	25870306	Nanog_1k_peak_4277	192	.	11.8237	22.8415	19.2517	68	FALSE	TRUE
chr13	26035282	26035633	Nanog_1k_peak_4280	526	.	18.7617	57.3818	52.6988	152	FALSE	FALSE
chr13	26364105	26364284	Nanog_1k_peak_4292	166	.	10.2123	20.159	16.682	84	FALSE	TRUE
chr13	26372833	26373144	Nanog_1k_peak_4293	273	.	12.1774	31.2566	27.3571	187	FALSE	FALSE
chr13	26523533	26523678	Nanog_1k_peak_4295	225	.	14.0121	26.2602	22.5388	86	TRUE	TRUE
chr13	27094743	27095103	Nanog_1k_peak_4308	280	.	12.9731	32.0226	28.0983	111	TRUE	FALSE
chr13	27116253	27116518	Nanog_1k_peak_4310	423	.	18.173	46.7626	42.3855	135	FALSE	FALSE
chr13	27785180	27785334	Nanog_1k_peak_4319	307	.	14.9554	34.7559	30.7405	102	FALSE	FALSE
chr13	27822557	27822886	Nanog_1k_peak_4321	234	.	13.7929	27.2392	23.4822	218	TRUE	FALSE
chr13	27851609	27851728	Nanog_1k_peak_4324	318	.	17.1828	35.9499	31.8961	54	FALSE	FALSE
chr13	27925575	27925857	Nanog_1k_peak_4328	428	.	17.9799	47.2009	42.8097	136	FALSE	FALSE
chr13	27986641	27986950	Nanog_1k_peak_4333	355	.	15.0091	39.7597	35.5889	204	FALSE	FALSE
chr13	28293432	28293554	Nanog_1k_peak_4336	281	.	15.9369	32.0611	28.1354	63	TRUE	FALSE
chr13	28459547	28460060	Nanog_1k_peak_4345	490	.	12.2818	53.6772	49.0942	443	FALSE	TRUE
chr13	28471490	28471879	Nanog_1k_peak_4347	319	.	12.9561	36.0117	31.9558	117	TRUE	TRUE
chr13	28494468	28495075	Nanog_1k_peak_4349	592	.	18.4148	64.1385	59.2702	512	FALSE	FALSE
chr13	28528742	28529008	Nanog_1k_peak_4352	493	.	20.5474	53.99	49.3976	177	TRUE	FALSE
chr13	28617814	28618031	Nanog_1k_peak_4356	314	.	16.1712	35.4674	31.4291	79	FALSE	TRUE
chr13	28748747	28749092	Nanog_1k_peak_4357	189	.	10.6322	22.4853	18.9096	219	TRUE	TRUE
chr13	28916662	28916857	Nanog_1k_peak_4360	145	.	10.2435	17.8938	14.5177	63	TRUE	TRUE
chr13	29014411	29014676	Nanog_1k_peak_4362	278	.	12.8352	31.7802	27.8643	95	TRUE	FALSE
chr13	29559930	29560216	Nanog_1k_peak_4381	173	.	11.2091	20.821	17.3149	125	TRUE	TRUE
chr13	29591971	29592143	Nanog_1k_peak_4384	400	.	17.2305	44.3805	40.0737	87	TRUE	FALSE
chr13	29661405	29661760	Nanog_1k_peak_4387	184	.	11.8785	21.9712	18.4169	253	FALSE	TRUE
chr13	30301135	30301675	Nanog_1k_peak_4407	323	.	10.1516	36.4593	32.3889	245	FALSE	TRUE
chr13	30302328	30302545	Nanog_1k_peak_4408	391	.	11.4445	43.455	39.1736	160	TRUE	FALSE
chr13	30645993	30646114	Nanog_1k_peak_4413	167	.	11.4974	20.1877	16.7096	58	FALSE	TRUE
chr13	30804917	30805356	Nanog_1k_peak_4418	710	.	14.1148	76.2208	71.0385	277	FALSE	FALSE
chr13	30814761	30815159	Nanog_1k_peak_4422	569	.	17.2584	61.7613	56.9552	265	FALSE	FALSE
chr13	30863320	30863866	Nanog_1k_peak_4424	244	.	11.9199	28.2543	24.4608	327	FALSE	TRUE
chr13	30883422	30883701	Nanog_1k_peak_4427	322	.	15.0916	36.3604	32.2933	131	TRUE	TRUE
chr13	30914674	30914900	Nanog_1k_peak_4429	363	.	15.4282	40.5013	36.3081	77	FALSE	FALSE
chr13	31647016	31647234	Nanog_1k_peak_4445	185	.	11.9355	22.0707	18.5122	96	FALSE	TRUE
chr13	31984442	31984688	Nanog_1k_peak_4454	337	.	16.3947	37.8711	33.7563	126	TRUE	TRUE
chr13	32145949	32146414	Nanog_1k_peak_4459	678	.	13.7821	72.9672	67.8702	262	TRUE	FALSE
chr13	32146774	32147053	Nanog_1k_peak_4460	452	.	10.6983	49.7556	45.2863	212	FALSE	TRUE
chr13	32186830	32187069	Nanog_1k_peak_4463	148	.	10.6189	18.2508	14.8579	50	FALSE	TRUE
chr13	32215060	32215247	Nanog_1k_peak_4467	211	.	11.3087	24.7769	21.1105	80	FALSE	TRUE
chr13	32215910	32216157	Nanog_1k_peak_4468	286	.	13.6607	32.5531	28.6108	100	FALSE	TRUE
chr13	32320023	32320218	Nanog_1k_peak_4469	365	.	18.1163	40.7819	36.5803	95	TRUE	TRUE
chr13	32454250	32454418	Nanog_1k_peak_4473	220	.	13.4851	25.7057	22.0049	57	FALSE	TRUE
chr13	32739778	32740203	Nanog_1k_peak_4482	361	.	15.7767	40.3842	36.1945	261	FALSE	FALSE
chr13	33056020	33056207	Nanog_1k_peak_4490	224	.	12.5129	26.2095	22.4899	121	FALSE	TRUE
chr13	33256615	33256890	Nanog_1k_peak_4494	178	.	11.5475	21.3987	17.8688	62	FALSE	TRUE
chr13	33281747	33281992	Nanog_1k_peak_4495	223	.	13.1255	26.0988	22.3837	39	TRUE	FALSE
chr13	33471318	33471449	Nanog_1k_peak_4499	230	.	14.429	26.8118	23.0706	51	TRUE	TRUE
chr13	33487742	33487898	Nanog_1k_peak_4500	276	.	11.6653	31.5941	27.6837	87	FALSE	FALSE
chr13	33489466	33489719	Nanog_1k_peak_4501	239	.	10.6118	27.7301	23.9553	144	FALSE	TRUE
chr13	33571987	33572261	Nanog_1k_peak_4504	161	.	10.7455	19.578	16.1257	178	TRUE	TRUE
chr13	33639019	33639173	Nanog_1k_peak_4505	167	.	11.5287	20.2483	16.7676	50	FALSE	TRUE
chr13	33746732	33747164	Nanog_1k_peak_4511	383	.	14.994	42.6365	38.3798	147	FALSE	TRUE
chr13	33902211	33902444	Nanog_1k_peak_4523	235	.	11.0562	27.3389	23.578	152	FALSE	TRUE
chr13	33906867	33907151	Nanog_1k_peak_4524	292	.	12.1814	33.2178	29.2524	63	FALSE	TRUE
chr13	34009331	34009755	Nanog_1k_peak_4529	251	.	11.6115	28.9599	25.1405	294	TRUE	FALSE
chr13	34168395	34168476	Nanog_1k_peak_4531	180	.	11.8805	21.5575	18.0217	38	FALSE	TRUE
chr13	34232618	34232888	Nanog_1k_peak_4533	155	.	10.3682	18.9407	15.5163	103	FALSE	TRUE
chr13	34364520	34364727	Nanog_1k_peak_4535	294	.	10.1289	33.3787	29.408	107	TRUE	TRUE
chr13	34781607	34781908	Nanog_1k_peak_4540	251	.	13.0475	28.9278	25.1095	143	FALSE	TRUE
chr13	34815258	34815442	Nanog_1k_peak_4543	148	.	10.4203	18.2043	14.814	124	FALSE	TRUE
chr13	34934026	34934315	Nanog_1k_peak_4549	257	.	10.6399	29.6072	25.7646	232	FALSE	TRUE
chr13	35024828	35025118	Nanog_1k_peak_4554	485	.	16.5426	53.162	48.5944	168	TRUE	FALSE
chr13	35388797	35388970	Nanog_1k_peak_4562	246	.	14.4966	28.4672	24.6655	84	FALSE	FALSE
chr13	35527622	35527906	Nanog_1k_peak_4564	210	.	12.6063	24.6833	21.0207	201	FALSE	TRUE
chr13	35760918	35761153	Nanog_1k_peak_4565	259	.	13.9339	29.7924	25.9427	84	FALSE	FALSE
chr13	35892153	35892359	Nanog_1k_peak_4566	475	.	20.3485	52.0438	47.5072	133	TRUE	FALSE
chr13	35908165	35908500	Nanog_1k_peak_4568	593	.	18.0698	64.2608	59.3896	241	TRUE	FALSE
chr13	35913825	35914305	Nanog_1k_peak_4569	384	.	12.2479	42.7012	38.4429	225	FALSE	TRUE
chr13	36028399	36028840	Nanog_1k_peak_4573	396	.	16.1348	43.9662	39.6707	316	FALSE	FALSE
chr13	36536450	36536763	Nanog_1k_peak_4582	557	.	19.5385	60.475	55.7039	109	FALSE	FALSE
chr13	36939640	36940119	Nanog_1k_peak_4593	578	.	20.2569	62.6413	57.8139	315	FALSE	FALSE
chr13	36957526	36957793	Nanog_1k_peak_4594	663	.	20.782	71.3833	66.323	208	FALSE	FALSE
chr13	36962675	36963001	Nanog_1k_peak_4595	387	.	15.5936	42.9957	38.7275	193	FALSE	FALSE
chr13	37087415	37087601	Nanog_1k_peak_4597	140	.	10.2846	17.3831	14.0304	54	FALSE	TRUE
chr13	37771615	37771992	Nanog_1k_peak_4602	165	.	10.4088	19.9712	16.5015	292	FALSE	TRUE
chr13	38708191	38708360	Nanog_1k_peak_4619	269	.	13.8226	30.8657	26.9802	75	TRUE	TRUE
chr13	38870506	38870707	Nanog_1k_peak_4622	200	.	12.3023	23.651	20.0278	113	TRUE	TRUE
chr13	39106908	39107329	Nanog_1k_peak_4625	611	.	18.9522	66.0546	61.1317	168	FALSE	FALSE
chr13	39124381	39124587	Nanog_1k_peak_4627	249	.	12.1837	28.7128	24.902	62	FALSE	FALSE
chr13	39366639	39366964	Nanog_1k_peak_4636	510	.	20.0834	55.6395	51.0036	152	FALSE	FALSE
chr13	39499627	39499836	Nanog_1k_peak_4637	179	.	11.8507	21.504	17.97	67	FALSE	TRUE
chr13	40096333	40096493	Nanog_1k_peak_4644	140	.	10.2846	17.3831	14.0304	69	FALSE	TRUE
chr13	40437383	40437534	Nanog_1k_peak_4651	231	.	13.8589	26.8436	23.1011	84	FALSE	FALSE
chr13	40567978	40568147	Nanog_1k_peak_4653	181	.	11.9708	21.7204	18.1772	97	FALSE	TRUE
chr13	40580413	40580587	Nanog_1k_peak_4654	149	.	10.4979	18.3418	14.9449	62	FALSE	TRUE
chr13	40587994	40588172	Nanog_1k_peak_4655	176	.	11.9864	21.1577	17.6378	92	FALSE	TRUE
chr13	40686227	40686778	Nanog_1k_peak_4657	332	.	16.1135	37.3969	33.2957	376	FALSE	FALSE
chr13	40726554	40726734	Nanog_1k_peak_4658	178	.	11.2619	21.3923	17.8632	106	FALSE	TRUE
chr13	40751073	40751372	Nanog_1k_peak_4661	301	.	15.396	34.1606	30.164	175	FALSE	FALSE
chr13	40771369	40771621	Nanog_1k_peak_4664	296	.	11.4204	33.6759	29.6953	90	FALSE	FALSE
chr13	40771706	40771911	Nanog_1k_peak_4665	332	.	12.2698	37.366	33.2659	79	FALSE	TRUE
chr13	40815970	40816148	Nanog_1k_peak_4666	211	.	13.4531	24.8431	21.1744	80	FALSE	TRUE
chr13	40957437	40957632	Nanog_1k_peak_4667	196	.	12.8151	23.2955	19.687	67	TRUE	TRUE
chr13	41745178	41745496	Nanog_1k_peak_4680	518	.	19.1648	56.477	51.8184	145	FALSE	FALSE
chr13	41765999	41766187	Nanog_1k_peak_4683	430	.	20.7837	47.4561	43.0587	100	FALSE	FALSE
chr13	41908665	41908838	Nanog_1k_peak_4685	163	.	11.4108	19.8141	16.3515	86	TRUE	TRUE
chr13	41999598	41999807	Nanog_1k_peak_4686	153	.	10.9101	18.809	15.391	106	FALSE	TRUE
chr13	42005581	42005772	Nanog_1k_peak_4687	402	.	16.4577	44.5398	40.2278	58	FALSE	FALSE
chr13	42536233	42536372	Nanog_1k_peak_4697	174	.	11.5607	20.988	17.4749	60	FALSE	TRUE
chr13	42818343	42818592	Nanog_1k_peak_4701	207	.	13.3966	24.4498	20.7963	74	TRUE	TRUE
chr13	42999128	42999327	Nanog_1k_peak_4705	321	.	15.8205	36.2151	32.1526	119	FALSE	TRUE
chr13	43418480	43418793	Nanog_1k_peak_4711	247	.	13.2195	28.5955	24.7889	184	FALSE	TRUE
chr13	44237517	44237606	Nanog_1k_peak_4722	301	.	17.284	34.1333	30.1379	48	FALSE	TRUE
chr13	44519869	44520018	Nanog_1k_peak_4725	159	.	11.1047	19.4436	15.9972	71	FALSE	TRUE
chr13	44816130	44816308	Nanog_1k_peak_4726	265	.	14.6374	30.3711	26.5015	102	FALSE	TRUE
chr13	45155832	45155947	Nanog_1k_peak_4733	244	.	14.3917	28.2821	24.487	39	FALSE	FALSE
chr13	45617935	45618086	Nanog_1k_peak_4738	220	.	13.7176	25.7033	22.0025	79	FALSE	TRUE
chr13	45777337	45777619	Nanog_1k_peak_4743	167	.	10.89	20.282	16.7998	218	FALSE	TRUE
chr13	46021564	46022370	Nanog_1k_peak_4744	245	.	10.0145	28.3486	24.5515	183	FALSE	FALSE
chr13	46178107	46178267	Nanog_1k_peak_4750	169	.	10.9862	20.444	16.9544	127	FALSE	TRUE
chr13	46197680	46197824	Nanog_1k_peak_4751	238	.	14.7232	27.6606	23.8883	52	FALSE	TRUE
chr13	46266469	46266573	Nanog_1k_peak_4752	226	.	14.0497	26.3324	22.6081	50	FALSE	TRUE
chr13	46416043	46416369	Nanog_1k_peak_4753	221	.	12.6434	25.8477	22.1412	164	FALSE	TRUE
chr13	46437186	46437394	Nanog_1k_peak_4756	296	.	14.6626	33.5891	29.6115	124	FALSE	TRUE
chr13	46927388	46927747	Nanog_1k_peak_4767	1440	.	23.7014	150.343	144.065	196	FALSE	FALSE
chr13	46941803	46942031	Nanog_1k_peak_4769	412	.	19.6726	45.5509	41.21	134	FALSE	TRUE
chr13	46973488	46974033	Nanog_1k_peak_4770	191	.	10.4498	22.739	19.1533	224	FALSE	FALSE
chr13	47106822	47107030	Nanog_1k_peak_4774	148	.	10.446	18.2498	14.8571	67	FALSE	TRUE
chr13	47574073	47574310	Nanog_1k_peak_4777	155	.	10.6398	18.9715	15.5458	77	FALSE	TRUE
chr13	48078089	48078260	Nanog_1k_peak_4784	186	.	12.2185	22.1721	18.6091	93	FALSE	TRUE
chr13	50062731	50062939	Nanog_1k_peak_4801	235	.	14.0981	27.2676	23.5099	75	FALSE	TRUE
chr13	50088102	50088235	Nanog_1k_peak_4802	151	.	10.8563	18.5931	15.1849	91	TRUE	TRUE
chr13	50235152	50235260	Nanog_1k_peak_4803	157	.	10.9892	19.2298	15.7933	41	FALSE	TRUE
chr13	50605397	50605802	Nanog_1k_peak_4805	554	.	19.4023	60.2229	55.4591	251	FALSE	FALSE
chr13	50614661	50615201	Nanog_1k_peak_4806	1023	.	16.7072	108.17	102.368	308	FALSE	FALSE
chr13	50624134	50624420	Nanog_1k_peak_4808	702	.	11.6907	75.4083	70.247	119	TRUE	FALSE
chr13	50625313	50625719	Nanog_1k_peak_4809	1524	.	19.3749	158.805	152.459	157	FALSE	FALSE
chr13	51887246	51887514	Nanog_1k_peak_4818	687	.	26.1424	73.9109	68.7874	123	FALSE	FALSE
chr14	14729	14913	Nanog_1k_peak_4822	389	.	13.4677	43.2612	38.9853	88	FALSE	FALSE
chr14	48957	49228	Nanog_1k_peak_4824	449	.	19.2766	49.4269	44.968	82	FALSE	FALSE
chr14	81046	81154	Nanog_1k_peak_4827	171	.	11.6055	20.6922	17.1918	61	FALSE	FALSE
chr14	448642	448756	Nanog_1k_peak_4832	173	.	11.852	20.8857	17.3771	82	FALSE	TRUE
chr14	502384	502747	Nanog_1k_peak_4833	433	.	16.9535	47.7121	43.3056	73	TRUE	FALSE
chr14	1171384	1171499	Nanog_1k_peak_4841	161	.	11.3486	19.6347	16.1797	32	FALSE	TRUE
chr14	1355607	1355807	Nanog_1k_peak_4845	141	.	10.0249	17.5141	14.1552	105	FALSE	TRUE
chr14	1605908	1606151	Nanog_1k_peak_4848	263	.	14.5739	30.2633	26.3972	146	TRUE	FALSE
chr14	1754929	1755728	Nanog_1k_peak_4850	196	.	10.1097	23.2848	19.6765	243	FALSE	TRUE
chr14	1844424	1844554	Nanog_1k_peak_4852	175	.	11.9525	21.0887	17.5713	61	FALSE	TRUE
chr14	1903373	1903707	Nanog_1k_peak_4854	292	.	15.6195	33.2546	29.2879	215	FALSE	FALSE
chr14	2233787	2234028	Nanog_1k_peak_4857	270	.	15.2959	30.9288	27.0407	58	FALSE	FALSE
chr14	3208123	3208390	Nanog_1k_peak_4871	182	.	11.7661	21.7758	18.2302	138	FALSE	TRUE
chr14	3507757	3508005	Nanog_1k_peak_4873	192	.	11.8237	22.8415	19.2517	169	TRUE	TRUE
chr14	4044398	4044637	Nanog_1k_peak_4877	207	.	12.7615	24.4379	20.785	95	FALSE	TRUE
chr14	4058087	4058313	Nanog_1k_peak_4878	202	.	13.2162	23.8991	20.2658	55	FALSE	TRUE
chr14	4587856	4588169	Nanog_1k_peak_4884	354	.	12.3841	39.6192	35.4525	164	FALSE	FALSE
chr14	4608804	4608947	Nanog_1k_peak_4885	230	.	14.075	26.7723	23.0328	44	FALSE	TRUE
chr14	5678305	5678544	Nanog_1k_peak_4905	255	.	10.5183	29.3654	25.5317	65	FALSE	TRUE
chr14	5686689	5686916	Nanog_1k_peak_4907	296	.	13.8896	33.6159	29.6372	150	TRUE	FALSE
chr14	5820823	5821256	Nanog_1k_peak_4911	361	.	14.1303	40.3053	36.1176	187	TRUE	TRUE
chr14	5847367	5847719	Nanog_1k_peak_4913	287	.	14.5256	32.697	28.7507	170	FALSE	TRUE
chr14	6030230	6030503	Nanog_1k_peak_4916	292	.	15.9443	33.2007	29.2356	38	FALSE	FALSE
chr14	6225337	6225440	Nanog_1k_peak_4917	161	.	11.1633	19.5531	16.1016	48	FALSE	TRUE
chr14	6429280	6429573	Nanog_1k_peak_4922	485	.	21.9094	53.1174	48.5512	185	FALSE	FALSE
chr14	6661330	6661479	Nanog_1k_peak_4926	337	.	17.198	37.8676	33.7531	75	TRUE	FALSE
chr14	6954532	6954845	Nanog_1k_peak_4930	325	.	15.6656	36.6408	32.5643	227	TRUE	FALSE
chr14	6962132	6962356	Nanog_1k_peak_4931	200	.	11.3713	23.7246	20.0986	95	TRUE	TRUE
chr14	6991299	6991596	Nanog_1k_peak_4932	183	.	11.5868	21.9395	18.3873	140	FALSE	TRUE
chr14	8946011	8946173	Nanog_1k_peak_4952	180	.	11.3846	21.5986	18.0605	56	FALSE	TRUE
chr14	9203000	9203265	Nanog_1k_peak_4953	176	.	10.1721	21.1586	17.6385	198	FALSE	TRUE
chr14	9570816	9571181	Nanog_1k_peak_4959	297	.	14.7715	33.7727	29.7885	207	FALSE	TRUE
chr14	9713659	9713888	Nanog_1k_peak_4961	190	.	12.229	22.5871	19.0075	64	FALSE	TRUE
chr14	9874203	9874315	Nanog_1k_peak_4962	198	.	12.4724	23.4592	19.844	62	FALSE	TRUE
chr14	10117247	10117514	Nanog_1k_peak_4966	143	.	10.1209	17.6803	14.3135	201	TRUE	TRUE
chr14	10525594	10525821	Nanog_1k_peak_4972	316	.	14.2842	35.6635	31.6191	88	TRUE	FALSE
chr14	10604146	10604415	Nanog_1k_peak_4973	302	.	16.8828	34.2923	30.2921	73	FALSE	TRUE
chr14	11282432	11282612	Nanog_1k_peak_4981	258	.	15.1981	29.7271	25.8804	84	TRUE	FALSE
chr14	11783188	11783483	Nanog_1k_peak_4985	174	.	11.7579	20.9746	17.4624	194	FALSE	TRUE
chr14	12020556	12020732	Nanog_1k_peak_4989	177	.	10.5777	21.2952	17.77	71	FALSE	TRUE
chr14	13679453	13679539	Nanog_1k_peak_5004	194	.	12.5058	23.0816	19.4821	25	FALSE	FALSE
chr14	14064362	14064532	Nanog_1k_peak_5009	181	.	11.1489	21.7134	18.1706	92	FALSE	TRUE
chr14	14201319	14201476	Nanog_1k_peak_5010	175	.	10.4235	21.0385	17.523	40	FALSE	TRUE
chr14	14659074	14659236	Nanog_1k_peak_5022	195	.	12.5373	23.1384	19.5361	79	FALSE	TRUE
chr14	14810907	14811211	Nanog_1k_peak_5028	213	.	12.1492	25.0224	21.3466	228	FALSE	TRUE
chr14	14841548	14841712	Nanog_1k_peak_5030	172	.	10.547	20.714	17.2124	56	TRUE	TRUE
chr14	14898597	14898851	Nanog_1k_peak_5033	145	.	10.0429	17.9519	14.5731	180	FALSE	TRUE
chr14	15203905	15204072	Nanog_1k_peak_5044	161	.	11.1633	19.5531	16.1016	74	FALSE	TRUE
chr14	15434746	15434931	Nanog_1k_peak_5045	144	.	10.528	17.8186	14.446	87	TRUE	TRUE
chr14	15486183	15486275	Nanog_1k_peak_5046	136	.	10.0978	16.9497	13.6173	50	FALSE	FALSE
chr14	15763900	15764085	Nanog_1k_peak_5050	244	.	10.5658	28.2465	24.4532	67	FALSE	TRUE
chr14	16013187	16013411	Nanog_1k_peak_5058	238	.	13.3391	27.5915	23.821	129	FALSE	FALSE
chr14	16217229	16217585	Nanog_1k_peak_5063	875	.	23.9233	93.0702	87.5401	169	FALSE	FALSE
chr14	16476819	16477064	Nanog_1k_peak_5067	248	.	12.8613	28.6141	24.8069	75	FALSE	TRUE
chr14	17000860	17001089	Nanog_1k_peak_5082	219	.	13.4519	25.6468	21.9485	147	FALSE	TRUE
chr14	17089046	17089329	Nanog_1k_peak_5088	189	.	10.3329	22.5391	18.9615	121	FALSE	TRUE
chr14	17138240	17138592	Nanog_1k_peak_5091	179	.	11.8507	21.504	17.97	198	FALSE	TRUE
chr14	17989873	17990121	Nanog_1k_peak_5107	325	.	16.4854	36.6598	32.5828	137	FALSE	TRUE
chr14	17999933	18000299	Nanog_1k_peak_5109	218	.	12.1143	25.5435	21.8487	229	FALSE	FALSE
chr14	18052099	18052557	Nanog_1k_peak_5110	203	.	11.8721	23.996	20.3593	196	FALSE	TRUE
chr14	18779277	18779732	Nanog_1k_peak_5118	386	.	15.5256	42.8731	38.609	151	FALSE	FALSE
chr14	18845366	18845776	Nanog_1k_peak_5122	241	.	11.7562	27.9685	24.1856	358	FALSE	TRUE
chr14	19380998	19381239	Nanog_1k_peak_5129	183	.	11.2869	21.9433	18.3904	140	TRUE	TRUE
chr14	19696993	19697635	Nanog_1k_peak_5135	377	.	13.5469	42.0102	37.7708	335	FALSE	TRUE
chr14	20090330	20090594	Nanog_1k_peak_5142	143	.	10.1452	17.7224	14.3538	223	FALSE	TRUE
chr14	20104435	20104555	Nanog_1k_peak_5146	141	.	10.3416	17.4951	14.1368	38	FALSE	TRUE
chr14	20351165	20351326	Nanog_1k_peak_5148	186	.	11.9931	22.1714	18.6085	120	TRUE	FALSE
chr14	20602942	20603326	Nanog_1k_peak_5153	174	.	10.0353	20.9282	17.4178	171	FALSE	TRUE
chr14	20920891	20921256	Nanog_1k_peak_5158	192	.	11.2034	22.8826	19.2911	58	FALSE	TRUE
chr14	21109727	21109962	Nanog_1k_peak_5162	553	.	21.6897	60.097	55.3369	130	FALSE	FALSE
chr14	21140007	21140652	Nanog_1k_peak_5164	488	.	14.4749	53.4051	48.8289	118	FALSE	FALSE
chr14	21753997	21754153	Nanog_1k_peak_5171	198	.	11.5281	23.4231	19.809	68	FALSE	TRUE
chr14	21754263	21754497	Nanog_1k_peak_5172	211	.	12.0316	24.8264	21.1582	141	FALSE	TRUE
chr14	21974056	21974241	Nanog_1k_peak_5174	145	.	10.4241	17.8866	14.5109	67	TRUE	TRUE
chr14	22021839	22022011	Nanog_1k_peak_5175	153	.	10.7108	18.7224	15.3078	99	FALSE	FALSE
chr14	22076456	22076673	Nanog_1k_peak_5176	238	.	12.2913	27.6499	23.8777	120	FALSE	TRUE
chr14	22197011	22197277	Nanog_1k_peak_5182	295	.	15.4231	33.5559	29.579	194	FALSE	FALSE
chr14	22495604	22495729	Nanog_1k_peak_5184	221	.	13.2796	25.8335	22.1276	61	FALSE	TRUE
chr14	22940565	22940858	Nanog_1k_peak_5195	206	.	12.0397	24.2756	20.6282	156	FALSE	TRUE
chr14	23499661	23499848	Nanog_1k_peak_5207	268	.	15.4766	30.7195	26.8388	37	FALSE	TRUE
chr14	23505306	23505604	Nanog_1k_peak_5208	533	.	21.9534	58.0346	53.3327	168	TRUE	FALSE
chr14	23594215	23594721	Nanog_1k_peak_5213	317	.	14.7339	35.7488	31.7019	407	FALSE	TRUE
chr14	23924711	23924934	Nanog_1k_peak_5221	315	.	12.7078	35.5423	31.5017	73	FALSE	TRUE
chr14	23925118	23925254	Nanog_1k_peak_5222	229	.	10.3517	26.6392	22.904	79	FALSE	TRUE
chr14	23950812	23951363	Nanog_1k_peak_5224	231	.	11.8665	26.9261	23.1806	385	FALSE	TRUE
chr14	23959326	23959614	Nanog_1k_peak_5225	534	.	22.5322	58.1922	53.4858	231	FALSE	TRUE
chr14	24410606	24410758	Nanog_1k_peak_5233	135	.	10.0086	16.8516	13.5247	54	FALSE	TRUE
chr14	24572808	24573032	Nanog_1k_peak_5237	466	.	22.5154	51.1874	46.6748	118	TRUE	FALSE
chr14	24597426	24597977	Nanog_1k_peak_5238	175	.	11.0944	21.1118	17.5932	215	FALSE	TRUE
chr14	24836393	24836713	Nanog_1k_peak_5245	466	.	14.1157	51.1267	46.6159	136	TRUE	FALSE
chr14	24935943	24936186	Nanog_1k_peak_5254	246	.	10.3644	28.4559	24.655	59	FALSE	FALSE
chr14	25465163	25465344	Nanog_1k_peak_5260	149	.	10.4979	18.3418	14.9449	63	FALSE	TRUE
chr14	25549665	25549980	Nanog_1k_peak_5263	243	.	12.2154	28.141	24.3517	171	FALSE	TRUE
chr14	25568502	25568667	Nanog_1k_peak_5265	136	.	10.1593	17.0078	13.6721	56	FALSE	TRUE
chr14	25600283	25600607	Nanog_1k_peak_5266	145	.	10.2684	17.9372	14.5595	189	FALSE	TRUE
chr14	25628477	25628733	Nanog_1k_peak_5267	294	.	15.7217	33.4282	29.456	60	FALSE	FALSE
chr14	25757239	25757425	Nanog_1k_peak_5270	376	.	19.8329	41.8847	37.6483	119	TRUE	FALSE
chr14	25894063	25894215	Nanog_1k_peak_5274	207	.	12.7615	24.4379	20.785	51	FALSE	TRUE
chr14	26222309	26222473	Nanog_1k_peak_5279	167	.	10.8425	20.2022	16.7233	120	FALSE	TRUE
chr14	26324915	26325339	Nanog_1k_peak_5283	326	.	15.3039	36.7222	32.6431	88	TRUE	FALSE
chr14	26378770	26379125	Nanog_1k_peak_5284	338	.	12.2197	37.9319	33.8153	167	TRUE	TRUE
chr14	27030247	27030431	Nanog_1k_peak_5300	232	.	14.2213	27.0426	23.2923	99	FALSE	TRUE
chr14	27038924	27039313	Nanog_1k_peak_5302	175	.	10.1376	21.1005	17.5823	174	FALSE	TRUE
chr14	27269817	27270001	Nanog_1k_peak_5307	144	.	10.487	17.7844	14.4131	125	TRUE	TRUE
chr14	27533649	27533983	Nanog_1k_peak_5312	398	.	13.5626	44.1662	39.8655	208	FALSE	TRUE
chr14	28024321	28024484	Nanog_1k_peak_5324	212	.	12.0784	24.9043	21.2335	117	FALSE	TRUE
chr14	28293764	28293899	Nanog_1k_peak_5334	155	.	10.391	18.979	15.5529	63	FALSE	TRUE
chr14	28336476	28336633	Nanog_1k_peak_5337	137	.	10.1172	17.0587	13.7211	67	FALSE	TRUE
chr14	29559974	29560323	Nanog_1k_peak_5363	200	.	11.3713	23.7246	20.0986	94	TRUE	TRUE
chr14	29941903	29942007	Nanog_1k_peak_5369	210	.	12.6342	24.7304	21.0659	75	FALSE	TRUE
chr14	30188665	30189148	Nanog_1k_peak_5374	209	.	11.233	24.6485	20.987	302	FALSE	TRUE
chr14	30394521	30394706	Nanog_1k_peak_5376	219	.	10.4494	25.6359	21.9379	91	TRUE	TRUE
chr14	30395482	30395633	Nanog_1k_peak_5378	256	.	11.5546	29.4843	25.6461	45	TRUE	TRUE
chr14	30532834	30533127	Nanog_1k_peak_5380	246	.	12.7477	28.4223	24.6224	95	FALSE	TRUE
chr14	30542621	30543024	Nanog_1k_peak_5383	955	.	11.5118	101.253	95.5679	161	FALSE	FALSE
chr14	30566280	30566575	Nanog_1k_peak_5386	211	.	12.0084	24.7876	21.1208	105	FALSE	TRUE
chr14	30586785	30587210	Nanog_1k_peak_5387	250	.	12.2612	28.847	25.0321	183	TRUE	FALSE
chr14	30753568	30753739	Nanog_1k_peak_5391	149	.	10.2499	18.3026	14.9076	53	TRUE	TRUE
chr14	30797674	30797975	Nanog_1k_peak_5392	489	.	17.1223	53.4967	48.9185	114	FALSE	FALSE
chr14	30807180	30807547	Nanog_1k_peak_5393	230	.	12.5332	26.8377	23.0955	165	FALSE	FALSE
chr14	30909552	30909858	Nanog_1k_peak_5401	234	.	10.3266	27.1862	23.4308	122	TRUE	TRUE
chr14	30918717	30918833	Nanog_1k_peak_5403	177	.	11.2135	21.3112	17.7852	36	FALSE	TRUE
chr14	30945265	30945580	Nanog_1k_peak_5406	574	.	19.577	62.2238	57.4078	184	FALSE	FALSE
chr14	30958109	30958381	Nanog_1k_peak_5408	368	.	11.5169	41.0147	36.8064	149	FALSE	FALSE
chr14	30960138	30960543	Nanog_1k_peak_5409	388	.	11.8334	43.0814	38.8111	121	FALSE	FALSE
chr14	31150043	31150347	Nanog_1k_peak_5416	324	.	14.3826	36.529	32.4565	147	FALSE	TRUE
chr14	31167561	31167848	Nanog_1k_peak_5418	270	.	11.0167	30.9705	27.0812	193	FALSE	TRUE
chr14	31299246	31299505	Nanog_1k_peak_5422	135	.	10.0086	16.8516	13.5247	64	TRUE	TRUE
chr14	31467813	31468148	Nanog_1k_peak_5424	213	.	11.11	25.0273	21.351	156	TRUE	TRUE
chr14	31608217	31608593	Nanog_1k_peak_5432	331	.	15.1806	37.2112	33.1161	146	FALSE	TRUE
chr14	31903117	31903496	Nanog_1k_peak_5441	216	.	10.9477	25.3391	21.6515	143	FALSE	TRUE
chr14	32009459	32009878	Nanog_1k_peak_5447	551	.	13.0341	59.9425	55.1857	219	FALSE	FALSE
chr14	32016611	32016824	Nanog_1k_peak_5448	216	.	12.3667	25.3854	21.6962	136	TRUE	TRUE
chr14	32062142	32062522	Nanog_1k_peak_5450	758	.	16.8747	81.0964	75.8055	148	FALSE	FALSE
chr14	32066795	32067051	Nanog_1k_peak_5451	333	.	10.0646	37.4518	33.3496	66	TRUE	FALSE
chr14	32133848	32134107	Nanog_1k_peak_5453	306	.	14.9011	34.6641	30.6518	171	FALSE	TRUE
chr14	32428235	32428682	Nanog_1k_peak_5461	366	.	16.0376	40.8364	36.6328	198	TRUE	FALSE
chr14	32486144	32486414	Nanog_1k_peak_5462	429	.	19.4008	47.3202	42.9262	104	FALSE	FALSE
chr14	32636249	32636609	Nanog_1k_peak_5466	201	.	11.4341	23.8295	20.1995	304	FALSE	TRUE
chr14	32647118	32647421	Nanog_1k_peak_5467	230	.	13.1796	26.7466	23.0077	125	FALSE	TRUE
chr14	32745498	32745960	Nanog_1k_peak_5475	1032	.	12.7412	109.031	103.216	292	FALSE	FALSE
chr14	32756470	32757097	Nanog_1k_peak_5478	423	.	11.45	46.743	42.3669	449	FALSE	TRUE
chr14	32765633	32765760	Nanog_1k_peak_5481	158	.	10.8461	19.3306	15.8895	64	FALSE	TRUE
chr14	32807334	32807487	Nanog_1k_peak_5483	198	.	12.7299	23.4879	19.8714	93	TRUE	TRUE
chr14	32966271	32966506	Nanog_1k_peak_5491	234	.	11.6982	27.2494	23.4922	74	TRUE	FALSE
chr14	33282952	33283046	Nanog_1k_peak_5497	318	.	16.053	35.9304	31.8771	47	FALSE	TRUE
chr14	33327613	33327910	Nanog_1k_peak_5500	330	.	13.5566	37.1309	33.0386	130	TRUE	FALSE
chr14	33857585	33857864	Nanog_1k_peak_5509	236	.	13.9216	27.4616	23.6962	95	TRUE	TRUE
chr14	33904972	33905228	Nanog_1k_peak_5510	368	.	17.8827	41.0831	36.8723	108	FALSE	FALSE
chr14	33969536	33969848	Nanog_1k_peak_5514	250	.	13.3719	28.8507	25.0351	184	FALSE	TRUE
chr14	33980845	33981028	Nanog_1k_peak_5517	224	.	11.4157	26.1515	22.4344	121	TRUE	FALSE
chr14	34490710	34491021	Nanog_1k_peak_5526	533	.	12.1277	58.0144	53.3136	147	FALSE	FALSE
chr14	34491747	34491994	Nanog_1k_peak_5527	610	.	13.157	65.9874	61.0665	117	FALSE	TRUE
chr14	34737317	34737448	Nanog_1k_peak_5530	290	.	16.7259	33.0389	29.0801	43	TRUE	FALSE
chr14	34758648	34758943	Nanog_1k_peak_5531	209	.	11.8935	24.596	20.9368	88	FALSE	TRUE
chr14	34787012	34787215	Nanog_1k_peak_5532	310	.	14.7628	35.1106	31.0839	124	TRUE	FALSE
chr14	34933659	34933828	Nanog_1k_peak_5535	402	.	20.2904	44.5441	40.2318	82	FALSE	FALSE
chr14	35293643	35293850	Nanog_1k_peak_5540	257	.	12.3044	29.5559	25.7152	82	FALSE	TRUE
chr14	35517767	35517923	Nanog_1k_peak_5546	187	.	12.4792	22.3635	18.7929	57	FALSE	TRUE
chr14	35774020	35774203	Nanog_1k_peak_5548	313	.	13.3519	35.3821	31.3471	108	FALSE	TRUE
chr14	35776678	35776916	Nanog_1k_peak_5549	278	.	12.1183	31.7963	27.8799	94	TRUE	TRUE
chr14	35791036	35791235	Nanog_1k_peak_5550	184	.	11.0264	22.0408	18.4839	71	FALSE	TRUE
chr14	36025200	36025337	Nanog_1k_peak_5552	184	.	12.2738	21.9582	18.4047	72	FALSE	TRUE
chr14	36048779	36049157	Nanog_1k_peak_5553	625	.	17.3073	67.535	62.5733	108	TRUE	FALSE
chr14	36056368	36056571	Nanog_1k_peak_5555	198	.	10.5449	23.4719	19.856	98	FALSE	TRUE
chr14	36239976	36240234	Nanog_1k_peak_5563	221	.	12.6692	25.8908	22.1828	182	TRUE	TRUE
chr14	36247395	36247672	Nanog_1k_peak_5565	458	.	12.588	50.3544	45.8681	104	TRUE	TRUE
chr14	36433024	36433299	Nanog_1k_peak_5571	243	.	12.9732	28.1826	24.3915	43	FALSE	TRUE
chr14	36580502	36580704	Nanog_1k_peak_5572	153	.	10.5396	18.7984	15.3808	51	FALSE	TRUE
chr14	37002586	37002742	Nanog_1k_peak_5578	158	.	11.0466	19.3359	15.8945	65	FALSE	TRUE
chr14	37105754	37106021	Nanog_1k_peak_5579	164	.	11.1709	19.9048	16.4383	155	TRUE	TRUE
chr14	37187380	37187591	Nanog_1k_peak_5583	165	.	10.0991	19.9713	16.5015	79	TRUE	TRUE
chr14	37552192	37552426	Nanog_1k_peak_5595	475	.	15.2735	52.1365	47.5972	120	FALSE	TRUE
chr14	37740695	37740999	Nanog_1k_peak_5602	167	.	10.2505	20.2224	16.7427	178	FALSE	TRUE
chr14	37904549	37905110	Nanog_1k_peak_5604	238	.	12.2496	27.5789	23.8091	202	FALSE	TRUE
chr14	38666954	38667203	Nanog_1k_peak_5616	303	.	13.5082	34.3023	30.3018	144	FALSE	TRUE
chr14	38750745	38751012	Nanog_1k_peak_5618	167	.	10.89	20.282	16.7998	118	FALSE	TRUE
chr14	38843537	38843891	Nanog_1k_peak_5624	827	.	15.7285	88.1594	82.7232	194	FALSE	FALSE
chr14	39230370	39230544	Nanog_1k_peak_5634	181	.	11.9708	21.7204	18.1772	122	FALSE	TRUE
chr14	39289722	39290219	Nanog_1k_peak_5637	868	.	19.2739	92.3827	86.8675	207	TRUE	FALSE
chr14	39310712	39310921	Nanog_1k_peak_5639	268	.	14.5149	30.7684	26.8862	99	TRUE	TRUE
chr14	39605849	39606043	Nanog_1k_peak_5641	561	.	22.1442	60.882	56.1006	117	TRUE	FALSE
chr14	39617053	39617354	Nanog_1k_peak_5642	176	.	11.675	21.1903	17.6692	252	TRUE	TRUE
chr14	39660011	39660392	Nanog_1k_peak_5643	505	.	18.9083	55.1966	50.5716	96	FALSE	FALSE
chr14	39741490	39741793	Nanog_1k_peak_5648	152	.	10.8506	18.6935	15.2801	220	FALSE	TRUE
chr14	40202035	40202432	Nanog_1k_peak_5659	191	.	11.4687	22.7762	19.1889	213	FALSE	TRUE
chr14	40220478	40220780	Nanog_1k_peak_5661	209	.	11.8935	24.596	20.9368	90	TRUE	TRUE
chr14	40283159	40283443	Nanog_1k_peak_5665	193	.	10.5694	22.9429	19.349	99	TRUE	TRUE
chr14	40349866	40350381	Nanog_1k_peak_5670	273	.	12.5308	31.242	27.3429	187	FALSE	TRUE
chr14	40665062	40665272	Nanog_1k_peak_5673	235	.	12.4623	27.3245	23.5644	55	FALSE	TRUE
chr14	40716268	40716539	Nanog_1k_peak_5676	295	.	16.4284	33.4756	29.5019	189	TRUE	TRUE
chr14	40759750	40760113	Nanog_1k_peak_5679	283	.	14.3099	32.3339	28.3991	125	TRUE	FALSE
chr14	40840294	40840505	Nanog_1k_peak_5683	310	.	15.9372	35.0722	31.047	107	TRUE	FALSE
chr14	41468985	41469155	Nanog_1k_peak_5688	213	.	12.8039	25.0186	21.343	90	TRUE	FALSE
chr14	41490124	41490614	Nanog_1k_peak_5691	188	.	10.2672	22.4266	18.8534	154	FALSE	FALSE
chr14	41681257	41681574	Nanog_1k_peak_5693	166	.	11.073	20.1381	16.6618	96	TRUE	TRUE
chr14	41692784	41693088	Nanog_1k_peak_5694	260	.	14.7044	29.9047	26.0512	233	FALSE	TRUE
chr14	41825068	41825210	Nanog_1k_peak_5697	196	.	12.7805	23.2287	19.6231	71	TRUE	TRUE
chr14	42159412	42159911	Nanog_1k_peak_5703	738	.	18.0487	79.1459	73.8991	177	TRUE	FALSE
chr14	42170179	42170497	Nanog_1k_peak_5704	539	.	17.7025	58.6226	53.904	159	TRUE	FALSE
chr14	42952785	42953083	Nanog_1k_peak_5716	190	.	11.4001	22.662	19.0797	112	FALSE	TRUE
chr14	43000861	43001061	Nanog_1k_peak_5718	193	.	11.2669	22.9883	19.3924	106	TRUE	TRUE
chr14	43118134	43118395	Nanog_1k_peak_5719	235	.	13.176	27.3181	23.5584	103	TRUE	TRUE
chr14	43124614	43125012	Nanog_1k_peak_5720	253	.	13.1907	29.1687	25.3419	148	FALSE	FALSE
chr14	43332354	43332699	Nanog_1k_peak_5722	176	.	10.8396	21.1994	17.6775	137	TRUE	TRUE
chr14	43793540	43793840	Nanog_1k_peak_5733	364	.	17.1924	40.6288	36.4312	164	TRUE	TRUE
chr14	43876627	43876943	Nanog_1k_peak_5735	192	.	12.1249	22.8571	19.2664	215	FALSE	FALSE
chr14	44471450	44471621	Nanog_1k_peak_5745	179	.	11.5744	21.4449	17.9132	71	TRUE	FALSE
chr14	44658171	44658439	Nanog_1k_peak_5749	180	.	10.7366	21.5593	18.0233	181	FALSE	TRUE
chr14	45565677	45565860	Nanog_1k_peak_5752	189	.	12.4111	22.529	18.9519	99	FALSE	TRUE
chr14	45642152	45642429	Nanog_1k_peak_5753	285	.	13.2372	32.4848	28.5449	147	FALSE	TRUE
chr14	45735439	45735630	Nanog_1k_peak_5754	180	.	11.6558	21.5851	18.0479	47	TRUE	TRUE
chr14	45966670	45966815	Nanog_1k_peak_5757	174	.	11.7579	20.9746	17.4624	41	FALSE	TRUE
chr14	46028502	46028802	Nanog_1k_peak_5760	336	.	12.8252	37.8011	33.6888	171	TRUE	FALSE
chr14	46802295	46802526	Nanog_1k_peak_5767	135	.	10.0086	16.8516	13.5247	127	TRUE	TRUE
chr14	46863189	46863277	Nanog_1k_peak_5768	173	.	11.6965	20.8604	17.353	49	FALSE	TRUE
chr14	47013613	47013807	Nanog_1k_peak_5770	181	.	11.7106	21.6799	18.1385	136	FALSE	TRUE
chr14	47374930	47375031	Nanog_1k_peak_5773	144	.	10.528	17.8186	14.446	66	TRUE	TRUE
chr14	47389130	47389249	Nanog_1k_peak_5775	154	.	10.0534	18.8877	15.4662	59	FALSE	TRUE
chr14	47902872	47903031	Nanog_1k_peak_5788	142	.	10.3993	17.6092	14.2458	47	FALSE	TRUE
chr14	48158564	48159033	Nanog_1k_peak_5792	228	.	11.3252	26.5998	22.866	92	FALSE	TRUE
chr14	48179274	48179485	Nanog_1k_peak_5795	210	.	11.9852	24.749	21.0839	85	TRUE	TRUE
chr14	49133426	49133678	Nanog_1k_peak_5801	171	.	11.6055	20.6922	17.1918	84	FALSE	TRUE
chr14	49683008	49683176	Nanog_1k_peak_5804	154	.	10.7653	18.821	15.4021	57	FALSE	TRUE
chr14	49918648	49918902	Nanog_1k_peak_5808	189	.	11.3323	22.5493	18.9712	133	FALSE	TRUE
chr15	143565	143725	Nanog_1k_peak_5830	243	.	14.5648	28.1093	24.3208	74	FALSE	TRUE
chr15	259198	259304	Nanog_1k_peak_5832	315	.	17.9841	35.5735	31.5322	61	FALSE	TRUE
chr15	1586197	1586590	Nanog_1k_peak_5851	304	.	13.9767	34.4435	30.4379	121	FALSE	FALSE
chr15	1594025	1594326	Nanog_1k_peak_5852	327	.	15.358	36.8141	32.7322	209	TRUE	TRUE
chr15	2372948	2373187	Nanog_1k_peak_5862	346	.	18.4799	38.8428	34.6996	118	FALSE	FALSE
chr15	2519654	2519776	Nanog_1k_peak_5864	191	.	12.041	22.713	19.1282	50	TRUE	TRUE
chr15	2975839	2975989	Nanog_1k_peak_5872	150	.	10.7334	18.4684	15.0656	100	FALSE	TRUE
chr15	3029932	3030327	Nanog_1k_peak_5873	334	.	15.8042	37.5717	33.466	189	TRUE	FALSE
chr15	3132715	3132855	Nanog_1k_peak_5876	290	.	16.4646	33.0152	29.0575	72	TRUE	FALSE
chr15	3503245	3503927	Nanog_1k_peak_5877	296	.	10.513	33.6375	29.6582	248	FALSE	FALSE
chr15	4223093	4223638	Nanog_1k_peak_5885	377	.	14.6722	42.0385	37.7983	126	FALSE	FALSE
chr15	4880665	4881029	Nanog_1k_peak_5891	152	.	10.4902	18.7134	15.2993	118	FALSE	TRUE
chr15	4909578	4909799	Nanog_1k_peak_5893	185	.	12.3415	22.0909	18.5316	86	FALSE	FALSE
chr15	5036738	5037155	Nanog_1k_peak_5895	205	.	10.2768	24.1554	20.5124	274	FALSE	FALSE
chr15	5466831	5467145	Nanog_1k_peak_5902	318	.	15.6396	35.9103	31.8578	172	FALSE	TRUE
chr15	5624636	5624846	Nanog_1k_peak_5905	171	.	11.7825	20.6058	17.109	55	FALSE	TRUE
chr15	5891540	5891680	Nanog_1k_peak_5908	150	.	10.3447	18.4641	15.0617	59	FALSE	TRUE
chr15	5901533	5901639	Nanog_1k_peak_5910	300	.	15.7155	34.0495	30.057	73	FALSE	FALSE
chr15	6000064	6000434	Nanog_1k_peak_5913	558	.	17.4809	60.6057	55.8316	158	FALSE	FALSE
chr15	6044710	6045022	Nanog_1k_peak_5914	171	.	10.2186	20.6972	17.1962	76	TRUE	TRUE
chr15	6374782	6374962	Nanog_1k_peak_5918	187	.	11.5247	22.3403	18.7704	146	FALSE	FALSE
chr15	6405907	6406252	Nanog_1k_peak_5921	258	.	13.8507	29.653	25.8086	264	TRUE	TRUE
chr15	6767351	6767523	Nanog_1k_peak_5924	185	.	11.9642	22.1209	18.5597	82	FALSE	TRUE
chr15	6787357	6787532	Nanog_1k_peak_5925	266	.	15.3618	30.5138	26.64	89	FALSE	TRUE
chr15	7046821	7047003	Nanog_1k_peak_5927	151	.	10.7917	18.58	15.1725	132	FALSE	FALSE
chr15	7156326	7156673	Nanog_1k_peak_5930	191	.	11.7475	22.7135	19.1286	136	FALSE	TRUE
chr15	7330068	7330281	Nanog_1k_peak_5936	243	.	14.0114	28.1564	24.3668	151	TRUE	TRUE
chr15	7965867	7966040	Nanog_1k_peak_5941	150	.	10.8217	18.4731	15.07	50	TRUE	TRUE
chr15	8563693	8563970	Nanog_1k_peak_5946	286	.	14.4711	32.6052	28.6617	151	TRUE	FALSE
chr15	10160352	10160531	Nanog_1k_peak_5951	342	.	16.686	38.3622	34.2334	76	TRUE	TRUE
chr15	10197174	10197347	Nanog_1k_peak_5954	140	.	10.3403	17.399	14.0452	59	FALSE	TRUE
chr15	10237985	10238218	Nanog_1k_peak_5955	355	.	14.215	39.7517	35.5812	107	TRUE	FALSE
chr15	10238373	10238596	Nanog_1k_peak_5956	408	.	15.5477	45.1428	40.8136	79	FALSE	FALSE
chr15	10245279	10245710	Nanog_1k_peak_5957	328	.	14.2157	36.9324	32.8467	183	FALSE	TRUE
chr15	10374187	10374520	Nanog_1k_peak_5964	218	.	12.788	25.5288	21.8343	128	TRUE	FALSE
chr15	10549832	10549970	Nanog_1k_peak_5968	157	.	10.742	19.1488	15.7156	64	FALSE	TRUE
chr15	12230084	12230237	Nanog_1k_peak_5989	169	.	11.0106	20.4851	16.9937	97	TRUE	TRUE
chr15	12495483	12495841	Nanog_1k_peak_5992	188	.	11.5735	22.4219	18.8488	124	TRUE	TRUE
chr15	12563356	12563750	Nanog_1k_peak_6000	250	.	13.7387	28.8558	25.04	87	FALSE	TRUE
chr15	12725223	12725478	Nanog_1k_peak_6003	242	.	12.9011	28.0616	24.2749	87	FALSE	TRUE
chr15	13465207	13465493	Nanog_1k_peak_6012	245	.	13.7651	28.3078	24.5121	104	TRUE	TRUE
chr15	13516411	13516749	Nanog_1k_peak_6016	351	.	16.4348	39.3475	35.1895	111	FALSE	TRUE
chr15	14042451	14042656	Nanog_1k_peak_6021	541	.	16.6554	58.9004	54.1741	89	FALSE	FALSE
chr15	14399676	14399760	Nanog_1k_peak_6032	168	.	11.6514	20.3561	16.8703	61	FALSE	TRUE
chr15	14552126	14552289	Nanog_1k_peak_6036	234	.	14.0634	27.2059	23.4499	87	FALSE	TRUE
chr15	14593329	14593651	Nanog_1k_peak_6038	186	.	10.798	22.2068	18.6421	175	FALSE	TRUE
chr15	14655665	14655983	Nanog_1k_peak_6040	151	.	10.3927	18.5463	15.1402	237	TRUE	TRUE
chr15	14747181	14747329	Nanog_1k_peak_6041	308	.	16.5898	34.9162	30.8958	81	TRUE	TRUE
chr15	14854325	14854470	Nanog_1k_peak_6043	199	.	12.5323	23.5638	19.9447	73	FALSE	TRUE
chr15	14861426	14861524	Nanog_1k_peak_6044	140	.	10.1579	17.3993	14.0454	50	FALSE	TRUE
chr15	15000260	15000617	Nanog_1k_peak_6046	308	.	15.0101	34.8484	30.8304	229	TRUE	FALSE
chr15	15248183	15248354	Nanog_1k_peak_6049	211	.	13.4168	24.7732	21.1071	77	FALSE	TRUE
chr15	15252688	15252807	Nanog_1k_peak_6050	157	.	10.742	19.1488	15.7156	50	FALSE	TRUE
chr15	15366654	15366992	Nanog_1k_peak_6052	675	.	22.8797	72.6802	67.5894	109	FALSE	FALSE
chr15	15389352	15389515	Nanog_1k_peak_6054	188	.	10.9365	22.4379	18.864	79	FALSE	TRUE
chr15	15479667	15479953	Nanog_1k_peak_6058	317	.	15.5802	35.8102	31.7613	59	FALSE	FALSE
chr15	16070155	16070449	Nanog_1k_peak_6073	454	.	15.6788	49.9212	45.4479	126	TRUE	FALSE
chr15	16335644	16335787	Nanog_1k_peak_6077	211	.	13.4168	24.7732	21.1071	47	FALSE	TRUE
chr15	16383734	16383833	Nanog_1k_peak_6079	164	.	10.062	19.9096	16.4429	66	FALSE	TRUE
chr15	16703568	16703819	Nanog_1k_peak_6085	253	.	12.0986	29.1956	25.368	117	TRUE	FALSE
chr15	17004453	17004553	Nanog_1k_peak_6096	186	.	11.1337	22.2192	18.6542	58	FALSE	TRUE
chr15	17253503	17254072	Nanog_1k_peak_6100	414	.	14.7385	45.8216	41.4734	471	FALSE	FALSE
chr15	18017853	18018081	Nanog_1k_peak_6109	300	.	14.9379	34.0531	30.0605	158	FALSE	FALSE
chr15	18063069	18063569	Nanog_1k_peak_6114	208	.	11.4899	24.498	20.8427	363	FALSE	FALSE
chr15	18593436	18593907	Nanog_1k_peak_6125	286	.	14.0913	32.6234	28.6795	250	FALSE	TRUE
chr15	18609130	18609265	Nanog_1k_peak_6126	179	.	11.5744	21.4449	17.9132	49	TRUE	TRUE
chr15	18885446	18885547	Nanog_1k_peak_6132	345	.	18.0664	38.7159	34.5763	57	TRUE	FALSE
chr15	19082686	19082916	Nanog_1k_peak_6134	368	.	15.315	41.0281	36.819	119	TRUE	TRUE
chr15	19288413	19288555	Nanog_1k_peak_6139	168	.	11.6514	20.3561	16.8703	94	FALSE	TRUE
chr15	19770084	19770309	Nanog_1k_peak_6146	142	.	10.2893	17.6384	14.2734	128	FALSE	TRUE
chr15	19888188	19888322	Nanog_1k_peak_6157	406	.	15.047	44.9434	40.6198	77	FALSE	TRUE
chr15	20012686	20013050	Nanog_1k_peak_6163	220	.	11.5524	25.7846	22.0807	205	FALSE	TRUE
chr15	20492362	20492881	Nanog_1k_peak_6179	294	.	13.036	33.462	29.4886	238	TRUE	FALSE
chr15	20731605	20731728	Nanog_1k_peak_6188	207	.	13.0328	24.4499	20.7963	45	FALSE	TRUE
chr15	20778777	20778944	Nanog_1k_peak_6191	257	.	14.5391	29.6214	25.7783	111	FALSE	FALSE
chr15	20832842	20833305	Nanog_1k_peak_6194	318	.	13.2357	35.8517	31.8013	250	FALSE	TRUE
chr15	21745616	21745784	Nanog_1k_peak_6206	199	.	12.2472	23.5573	19.9384	94	FALSE	TRUE
chr15	21773150	21773803	Nanog_1k_peak_6207	360	.	10.9122	40.2028	36.0186	219	FALSE	TRUE
chr15	21923844	21924001	Nanog_1k_peak_6212	232	.	11.1929	26.9746	23.227	92	FALSE	TRUE
chr15	22215543	22215697	Nanog_1k_peak_6219	188	.	12.1099	22.3766	18.8052	87	TRUE	TRUE
chr15	22340028	22340306	Nanog_1k_peak_6225	288	.	11.9503	32.7801	28.8309	189	FALSE	TRUE
chr15	22800450	22800609	Nanog_1k_peak_6232	147	.	10.3947	18.159	14.7704	53	FALSE	TRUE
chr15	22961942	22962303	Nanog_1k_peak_6236	216	.	12.6793	25.346	21.6582	159	TRUE	TRUE
chr15	23340970	23341159	Nanog_1k_peak_6248	252	.	13.8521	29.0461	25.2233	76	FALSE	TRUE
chr15	23692273	23692458	Nanog_1k_peak_6259	141	.	10.2101	17.4939	14.1358	64	FALSE	TRUE
chr15	23793258	23793527	Nanog_1k_peak_6264	585	.	24.6308	63.4324	58.5808	210	FALSE	FALSE
chr15	23915042	23915235	Nanog_1k_peak_6267	364	.	18.4535	40.6803	36.4813	44	TRUE	FALSE
chr15	24325386	24325684	Nanog_1k_peak_6276	248	.	11.7762	28.6275	24.8198	102	FALSE	TRUE
chr15	24665665	24665868	Nanog_1k_peak_6286	263	.	10.6444	30.2279	26.3631	91	FALSE	TRUE
chr15	24746758	24746982	Nanog_1k_peak_6288	204	.	10.8869	24.0588	20.4198	75	FALSE	FALSE
chr15	24795360	24795476	Nanog_1k_peak_6290	268	.	15.9456	30.7427	26.861	60	FALSE	TRUE
chr15	24922431	24922625	Nanog_1k_peak_6293	187	.	11.8229	22.3402	18.7704	119	FALSE	TRUE
chr15	25202422	25202762	Nanog_1k_peak_6301	228	.	10.9855	26.6046	22.8706	186	FALSE	TRUE
chr15	25308844	25309372	Nanog_1k_peak_6304	155	.	10.1354	19.0234	15.5956	222	TRUE	TRUE
chr15	25315092	25315423	Nanog_1k_peak_6305	273	.	12.1944	31.2875	27.3869	184	TRUE	TRUE
chr15	25568677	25568903	Nanog_1k_peak_6309	159	.	11.0756	19.3896	15.9456	186	FALSE	TRUE
chr15	25584277	25584715	Nanog_1k_peak_6310	170	.	10.7739	20.5773	17.0819	171	FALSE	FALSE
chr15	25681601	25681859	Nanog_1k_peak_6313	353	.	12.6431	39.4801	35.3174	88	FALSE	FALSE
chr15	26165474	26165916	Nanog_1k_peak_6319	295	.	12.6956	33.5125	29.5375	190	FALSE	TRUE
chr15	26322333	26322646	Nanog_1k_peak_6324	175	.	11.6176	21.0885	17.5712	167	TRUE	TRUE
chr15	26675709	26675899	Nanog_1k_peak_6329	154	.	10.3229	18.8647	15.4442	118	FALSE	TRUE
chr15	26908390	26908597	Nanog_1k_peak_6331	254	.	14.3455	29.291	25.46	92	TRUE	FALSE
chr15	26984427	26984605	Nanog_1k_peak_6337	308	.	13.4373	34.855	30.8365	97	TRUE	FALSE
chr15	26992052	26992416	Nanog_1k_peak_6339	380	.	15.6181	42.3015	38.0542	96	TRUE	FALSE
chr15	27358350	27358695	Nanog_1k_peak_6348	240	.	12.7592	27.8235	24.0455	263	FALSE	TRUE
chr15	27367831	27368064	Nanog_1k_peak_6350	217	.	10.0127	25.4122	21.722	105	TRUE	TRUE
chr15	27374601	27374964	Nanog_1k_peak_6354	344	.	11.0346	38.5895	34.4534	202	FALSE	FALSE
chr15	27439029	27439311	Nanog_1k_peak_6357	395	.	12.768	43.8642	39.5717	200	TRUE	FALSE
chr15	27774165	27774320	Nanog_1k_peak_6368	198	.	12.7299	23.4879	19.8714	71	FALSE	TRUE
chr15	27879380	27879933	Nanog_1k_peak_6371	674	.	17.6987	72.5151	67.4278	230	TRUE	FALSE
chr15	27910619	27910871	Nanog_1k_peak_6375	234	.	13.1225	27.2285	23.4718	143	FALSE	TRUE
chr15	28284955	28285436	Nanog_1k_peak_6380	481	.	11.4835	52.7549	48.1993	188	TRUE	TRUE
chr15	28384215	28384455	Nanog_1k_peak_6387	345	.	17.2871	38.69	34.5513	110	TRUE	FALSE
chr15	29012530	29012736	Nanog_1k_peak_6397	529	.	16.7916	57.597	52.9073	107	TRUE	FALSE
chr15	29015934	29016246	Nanog_1k_peak_6398	340	.	12.3138	38.1262	34.0038	149	FALSE	TRUE
chr15	29140101	29140367	Nanog_1k_peak_6406	146	.	10.111	18.0669	14.6826	131	FALSE	TRUE
chr15	29351819	29352535	Nanog_1k_peak_6409	224	.	11.7473	26.1162	22.4005	617	FALSE	TRUE
chr15	29613280	29613441	Nanog_1k_peak_6415	176	.	11.4412	21.2165	17.6941	47	FALSE	TRUE
chr15	29661254	29661471	Nanog_1k_peak_6417	267	.	13.6957	30.6521	26.7736	118	TRUE	FALSE
chr15	29780241	29780404	Nanog_1k_peak_6421	158	.	10.0097	19.3106	15.8703	99	FALSE	TRUE
chr15	29875150	29875483	Nanog_1k_peak_6424	190	.	12.4438	22.5901	19.0102	134	FALSE	TRUE
chr15	30118311	30118582	Nanog_1k_peak_6431	197	.	11.8	23.3284	19.7184	79	FALSE	TRUE
chr15	30485997	30486366	Nanog_1k_peak_6448	534	.	14.9005	58.1227	53.4183	133	FALSE	FALSE
chr15	30649260	30649427	Nanog_1k_peak_6451	207	.	13.2031	24.3662	20.7153	105	FALSE	TRUE
chr15	30684867	30685422	Nanog_1k_peak_6452	230	.	11.4293	26.7817	23.0418	174	FALSE	TRUE
chr15	30838722	30838868	Nanog_1k_peak_6458	174	.	10.3856	20.9755	17.4631	72	TRUE	TRUE
chr15	31023051	31023187	Nanog_1k_peak_6464	205	.	13.2836	24.2202	20.575	66	FALSE	TRUE
chr15	31177263	31177478	Nanog_1k_peak_6468	191	.	11.4687	22.7762	19.1889	112	TRUE	TRUE
chr15	31516530	31516754	Nanog_1k_peak_6470	238	.	13.9869	27.5747	23.8051	64	FALSE	TRUE
chr15	31714048	31714327	Nanog_1k_peak_6475	145	.	10.0429	17.9519	14.5731	224	TRUE	TRUE
chr15	32113148	32113275	Nanog_1k_peak_6481	135	.	10.0086	16.8516	13.5247	64	FALSE	TRUE
chr15	32596123	32596302	Nanog_1k_peak_6486	221	.	13.2796	25.8335	22.1276	93	FALSE	TRUE
chr15	33065856	33066038	Nanog_1k_peak_6489	136	.	10.0898	17.0063	13.6708	44	TRUE	TRUE
chr15	33077054	33077175	Nanog_1k_peak_6491	242	.	13.6201	28.0636	24.2766	74	FALSE	TRUE
chr15	33319243	33319569	Nanog_1k_peak_6494	314	.	13.8001	35.5019	31.4623	103	FALSE	TRUE
chr15	33345902	33346273	Nanog_1k_peak_6499	1055	.	20.1605	111.385	105.541	226	TRUE	FALSE
chr15	33353929	33354201	Nanog_1k_peak_6500	159	.	11.0756	19.3896	15.9456	41	FALSE	TRUE
chr15	33966569	33966788	Nanog_1k_peak_6507	506	.	15.6957	55.3155	50.6876	93	FALSE	FALSE
chr15	34121570	34121845	Nanog_1k_peak_6513	173	.	10.6497	20.8843	17.376	61	FALSE	TRUE
chr15	34592983	34593187	Nanog_1k_peak_6525	440	.	13.8886	48.4439	44.0151	78	TRUE	FALSE
chr15	34622322	34622977	Nanog_1k_peak_6528	304	.	13.2058	34.4391	30.4337	373	FALSE	TRUE
chr15	35286760	35286961	Nanog_1k_peak_6538	138	.	10.1724	17.1649	13.8224	79	TRUE	TRUE
chr15	35353285	35353702	Nanog_1k_peak_6539	257	.	11.6021	29.5713	25.7299	85	TRUE	FALSE
chr15	35407633	35408019	Nanog_1k_peak_6540	185	.	11.6905	22.1153	18.5542	327	FALSE	TRUE
chr15	35424535	35424936	Nanog_1k_peak_6541	387	.	14.7875	42.9823	38.7147	195	FALSE	FALSE
chr15	35617662	35617819	Nanog_1k_peak_6543	154	.	10.8204	18.921	15.4978	63	FALSE	FALSE
chr15	35661562	35661819	Nanog_1k_peak_6545	414	.	11.5725	45.7477	41.401	73	TRUE	TRUE
chr15	35665712	35666062	Nanog_1k_peak_6546	298	.	10.0803	33.8684	29.8811	134	FALSE	TRUE
chr15	35930122	35930246	Nanog_1k_peak_6549	202	.	12.7154	23.8855	20.2526	49	FALSE	TRUE
chr15	36187599	36187877	Nanog_1k_peak_6555	209	.	12.5786	24.6363	20.9753	100	FALSE	TRUE
chr15	36429155	36429517	Nanog_1k_peak_6558	230	.	11.7697	26.7603	23.021	173	TRUE	TRUE
chr15	36537573	36537853	Nanog_1k_peak_6564	227	.	11.2568	26.48	22.7505	88	FALSE	TRUE
chr15	36598165	36598587	Nanog_1k_peak_6566	801	.	24.8764	85.5592	80.1782	173	TRUE	FALSE
chr15	36643570	36643776	Nanog_1k_peak_6568	243	.	13.9799	28.1026	24.3145	74	FALSE	TRUE
chr15	36789030	36789277	Nanog_1k_peak_6570	267	.	14.4247	30.6166	26.7393	160	FALSE	TRUE
chr15	36890223	36890540	Nanog_1k_peak_6573	189	.	11.9037	22.4781	18.903	118	TRUE	TRUE
chr15	37274373	37274467	Nanog_1k_peak_6578	172	.	11.7859	20.7535	17.2501	30	FALSE	FALSE
chr15	37559291	37559634	Nanog_1k_peak_6579	309	.	15.0653	34.9415	30.9204	80	FALSE	FALSE
chr15	37793512	37793605	Nanog_1k_peak_6584	161	.	10.77	19.6197	16.1651	45	TRUE	TRUE
chr15	37929026	37929235	Nanog_1k_peak_6587	167	.	11.1251	20.228	16.7478	129	FALSE	FALSE
chr15	38225524	38225786	Nanog_1k_peak_6588	312	.	14.8667	35.2872	31.2546	202	FALSE	TRUE
chr15	38249003	38249188	Nanog_1k_peak_6589	163	.	10.3264	19.8348	16.3713	147	FALSE	TRUE
chr15	38263343	38263463	Nanog_1k_peak_6590	177	.	11.733	21.2934	17.7684	63	FALSE	TRUE
chr15	38290686	38290810	Nanog_1k_peak_6591	218	.	13.6103	25.5033	21.81	80	TRUE	TRUE
chr15	38540389	38540809	Nanog_1k_peak_6595	158	.	10.3034	19.3021	15.8622	202	FALSE	TRUE
chr15	38641343	38641640	Nanog_1k_peak_6598	220	.	12.2288	25.735	22.0327	76	FALSE	TRUE
chr15	38903866	38904036	Nanog_1k_peak_6601	176	.	11.8828	21.2085	17.6865	73	TRUE	TRUE
chr15	39843154	39843271	Nanog_1k_peak_6611	194	.	12.8618	23.0552	19.4563	54	FALSE	FALSE
chr15	39905791	39906212	Nanog_1k_peak_6614	336	.	10.9697	37.8018	33.6895	175	FALSE	TRUE
chr15	41444585	41444731	Nanog_1k_peak_6629	526	.	24.765	57.3211	52.6403	69	FALSE	FALSE
chr15	41647745	41648019	Nanog_1k_peak_6633	373	.	16.4735	41.5881	37.362	63	FALSE	FALSE
chr15	41732391	41732508	Nanog_1k_peak_6637	193	.	12.6099	22.9029	19.3107	51	FALSE	TRUE
chr15	41807284	41807517	Nanog_1k_peak_6638	377	.	15.8631	41.9991	37.7602	71	FALSE	FALSE
chr15	41819770	41819935	Nanog_1k_peak_6641	200	.	11.3506	23.6899	20.0653	92	FALSE	FALSE
chr15	42204605	42204751	Nanog_1k_peak_6643	242	.	13.6201	28.0636	24.2766	50	TRUE	TRUE
chr15	42215478	42215749	Nanog_1k_peak_6644	245	.	13.7945	28.3574	24.5598	146	TRUE	FALSE
chr15	43526471	43527486	Nanog_1k_peak_6661	512	.	11.2304	55.9122	51.2685	834	FALSE	FALSE
chr15	43775498	43775696	Nanog_1k_peak_6670	155	.	10.8761	19.0224	15.5949	65	TRUE	TRUE
chr15	43834527	43834775	Nanog_1k_peak_6671	139	.	10.0807	17.2599	13.9129	104	FALSE	TRUE
chr15	44120842	44121046	Nanog_1k_peak_6677	520	.	14.6039	56.6789	52.0155	72	FALSE	FALSE
chr15	44123518	44123804	Nanog_1k_peak_6678	409	.	13.091	45.2726	40.94	157	FALSE	FALSE
chr15	44827431	44827527	Nanog_1k_peak_6682	139	.	10.2282	17.273	13.9247	50	TRUE	FALSE
chr15	45548551	45548786	Nanog_1k_peak_6686	341	.	17.424	38.2527	34.1267	64	FALSE	FALSE
chr15	45597640	45597833	Nanog_1k_peak_6687	196	.	12.7805	23.2287	19.6231	124	FALSE	TRUE
chr15	45605113	45605439	Nanog_1k_peak_6688	717	.	25.2391	76.9136	71.7128	86	TRUE	FALSE
chr15	46750541	46750645	Nanog_1k_peak_6699	146	.	10.3438	18.0695	14.6849	62	FALSE	FALSE
chr15	46835876	46836302	Nanog_1k_peak_6701	1190	.	22.4412	125.039	119.046	214	FALSE	FALSE
chr15	46995212	46995345	Nanog_1k_peak_6704	193	.	12.4122	22.9134	19.3208	74	FALSE	TRUE
chr15	47435766	47435973	Nanog_1k_peak_6707	643	.	23.0425	69.406	64.3989	64	TRUE	FALSE
chr15	47485264	47485627	Nanog_1k_peak_6709	297	.	13.9354	33.6947	29.7131	205	FALSE	FALSE
chr15	47864444	47864650	Nanog_1k_peak_6713	833	.	31.0419	88.8495	83.3982	112	FALSE	FALSE
chr16	218440	218668	Nanog_1k_peak_6719	325	.	14.0676	36.6689	32.5916	199	TRUE	FALSE
chr16	562059	562347	Nanog_1k_peak_6726	360	.	13.7329	40.2589	36.0727	121	TRUE	FALSE
chr16	569967	570255	Nanog_1k_peak_6728	207	.	12.4689	24.4509	20.7971	149	FALSE	TRUE
chr16	1364864	1365076	Nanog_1k_peak_6751	221	.	12.9545	25.8097	22.1049	55	FALSE	TRUE
chr16	1520060	1520287	Nanog_1k_peak_6754	180	.	11.6285	21.5381	18.0029	87	FALSE	FALSE
chr16	1558944	1559154	Nanog_1k_peak_6757	155	.	10.6398	18.9715	15.5458	93	TRUE	TRUE
chr16	2879853	2880015	Nanog_1k_peak_6771	210	.	11.9392	24.6722	21.01	56	FALSE	TRUE
chr16	3251867	3252090	Nanog_1k_peak_6775	145	.	10.5762	17.9648	14.5856	160	TRUE	TRUE
chr16	4134028	4134327	Nanog_1k_peak_6779	142	.	10.2893	17.6384	14.2734	254	TRUE	TRUE
chr16	4654032	4654395	Nanog_1k_peak_6789	596	.	19.454	64.517	59.6379	235	TRUE	FALSE
chr16	4775045	4775383	Nanog_1k_peak_6791	254	.	11.4451	29.2837	25.4533	200	FALSE	TRUE
chr16	5143117	5143225	Nanog_1k_peak_6795	273	.	15.7511	31.2163	27.3179	47	FALSE	TRUE
chr16	5153659	5153791	Nanog_1k_peak_6796	179	.	11.6014	21.4913	17.958	95	TRUE	TRUE
chr16	5412669	5412839	Nanog_1k_peak_6800	205	.	10.3061	24.2078	20.5631	55	FALSE	FALSE
chr16	5531171	5531383	Nanog_1k_peak_6803	178	.	11.2376	21.3517	17.824	101	TRUE	TRUE
chr16	5880892	5881028	Nanog_1k_peak_6808	365	.	19.191	40.7112	36.5113	39	TRUE	TRUE
chr16	5886183	5886468	Nanog_1k_peak_6809	139	.	10.0807	17.2599	13.9129	79	FALSE	TRUE
chr16	6199204	6199508	Nanog_1k_peak_6815	308	.	14.2513	34.9189	30.8984	168	FALSE	FALSE
chr16	6253499	6253596	Nanog_1k_peak_6817	148	.	10.6976	18.2137	14.8227	31	FALSE	TRUE
chr16	6456087	6456363	Nanog_1k_peak_6820	253	.	13.9095	29.1425	25.3165	236	FALSE	FALSE
chr16	6602053	6602506	Nanog_1k_peak_6826	483	.	15.2616	52.8692	48.3102	386	FALSE	TRUE
chr16	6835257	6835696	Nanog_1k_peak_6833	153	.	10.2335	18.7148	15.3007	285	FALSE	FALSE
chr16	7153647	7154238	Nanog_1k_peak_6836	648	.	18.386	69.9003	64.8793	324	FALSE	FALSE
chr16	7231477	7231837	Nanog_1k_peak_6838	406	.	14.6684	44.9494	40.6255	164	FALSE	FALSE
chr16	7798716	7798937	Nanog_1k_peak_6843	139	.	10.2792	17.2657	13.918	133	FALSE	TRUE
chr16	7828794	7828995	Nanog_1k_peak_6844	204	.	13.2947	24.0715	20.4321	91	TRUE	TRUE
chr16	8060499	8060812	Nanog_1k_peak_6850	186	.	11.9931	22.1714	18.6085	241	FALSE	FALSE
chr16	8930533	8930753	Nanog_1k_peak_6862	254	.	14.3455	29.291	25.46	42	FALSE	TRUE
chr16	9040465	9040857	Nanog_1k_peak_6864	154	.	10.3455	18.9026	15.4803	294	TRUE	TRUE
chr16	9898698	9898979	Nanog_1k_peak_6881	265	.	13.5465	30.4008	26.5305	194	TRUE	TRUE
chr16	9971994	9972234	Nanog_1k_peak_6882	287	.	14.1414	32.7083	28.7613	148	FALSE	TRUE
chr16	9979442	9979543	Nanog_1k_peak_6884	145	.	10.2435	17.8938	14.5177	47	FALSE	TRUE
chr16	10318777	10318905	Nanog_1k_peak_6887	319	.	16.8517	35.9846	31.9297	68	FALSE	FALSE
chr16	10329602	10329762	Nanog_1k_peak_6888	193	.	12.6099	22.9029	19.3107	74	FALSE	TRUE
chr16	11004437	11004737	Nanog_1k_peak_6899	424	.	18.2364	46.8714	42.491	171	TRUE	FALSE
chr16	11031095	11031301	Nanog_1k_peak_6901	235	.	10.7167	27.3231	23.5631	74	FALSE	TRUE
chr16	11056374	11056760	Nanog_1k_peak_6904	232	.	13.3494	27.0327	23.2829	57	FALSE	TRUE
chr16	11150917	11151159	Nanog_1k_peak_6906	172	.	10.2737	20.789	17.2841	90	FALSE	TRUE
chr16	11151477	11151745	Nanog_1k_peak_6907	359	.	16.4976	40.1718	35.9883	157	FALSE	TRUE
chr16	11185610	11185850	Nanog_1k_peak_6908	197	.	12.6329	23.3113	19.7022	125	FALSE	FALSE
chr16	12060721	12060907	Nanog_1k_peak_6925	305	.	16.7097	34.5348	30.5262	64	FALSE	FALSE
chr16	12173610	12173797	Nanog_1k_peak_6927	186	.	12.0221	22.2222	18.657	125	TRUE	FALSE
chr16	12267459	12267702	Nanog_1k_peak_6934	440	.	19.174	48.4723	44.0421	102	FALSE	FALSE
chr16	12275240	12275386	Nanog_1k_peak_6935	173	.	11.5044	20.8888	17.38	42	TRUE	TRUE
chr16	13613934	13614086	Nanog_1k_peak_6949	255	.	14.4094	29.4	25.5648	101	FALSE	FALSE
chr16	13680655	13680910	Nanog_1k_peak_6952	278	.	14.7564	31.797	27.8806	59	FALSE	FALSE
chr16	13744192	13744433	Nanog_1k_peak_6955	190	.	10.7425	22.6708	19.088	152	TRUE	TRUE
chr16	14009874	14010106	Nanog_1k_peak_6964	152	.	10.821	18.6365	15.226	186	FALSE	TRUE
chr16	14378850	14379027	Nanog_1k_peak_6965	211	.	13.5503	24.7668	21.101	78	FALSE	TRUE
chr16	14976052	14976297	Nanog_1k_peak_6975	198	.	11.2073	23.4504	19.8357	63	FALSE	TRUE
chr16	15135200	15135681	Nanog_1k_peak_6977	158	.	10.5771	19.2926	15.8529	145	FALSE	TRUE
chr16	15378998	15379575	Nanog_1k_peak_6982	584	.	16.1233	63.2599	58.4144	390	FALSE	TRUE
chr16	15383234	15383389	Nanog_1k_peak_6983	344	.	11.3267	38.6241	34.4872	74	FALSE	TRUE
chr16	15396863	15397294	Nanog_1k_peak_6985	357	.	12.5436	39.9543	35.7777	180	FALSE	FALSE
chr16	15429552	15429986	Nanog_1k_peak_6986	225	.	10.1469	26.2508	22.5299	212	FALSE	TRUE
chr16	15431230	15431503	Nanog_1k_peak_6987	527	.	17.5264	57.4697	52.7831	142	TRUE	FALSE
chr16	15792036	15792215	Nanog_1k_peak_6996	231	.	13.8589	26.8436	23.1011	123	FALSE	FALSE
chr16	15882597	15882909	Nanog_1k_peak_6999	271	.	13.9519	31.083	27.189	75	FALSE	FALSE
chr16	16170663	16170806	Nanog_1k_peak_7001	200	.	12.3023	23.651	20.0278	56	TRUE	TRUE
chr16	16188467	16189155	Nanog_1k_peak_7002	541	.	17.4093	58.8473	54.1222	342	TRUE	FALSE
chr16	16199840	16200050	Nanog_1k_peak_7003	252	.	14.2193	29.0763	25.2527	133	TRUE	FALSE
chr16	16332816	16333192	Nanog_1k_peak_7007	246	.	10.9984	28.4571	24.656	112	FALSE	TRUE
chr16	16343240	16343460	Nanog_1k_peak_7010	349	.	11.234	39.0556	34.9064	158	FALSE	FALSE
chr16	16439280	16439457	Nanog_1k_peak_7012	211	.	13.4531	24.8431	21.1744	92	FALSE	TRUE
chr16	16446010	16446131	Nanog_1k_peak_7013	165	.	10.9956	20.0052	16.5343	88	FALSE	TRUE
chr16	16468843	16468971	Nanog_1k_peak_7015	380	.	19.3682	42.2689	38.0227	80	FALSE	TRUE
chr16	16768987	16769199	Nanog_1k_peak_7023	167	.	11.099	20.183	16.705	90	FALSE	FALSE
chr16	16922931	16923205	Nanog_1k_peak_7026	154	.	10.7928	18.8708	15.4502	160	TRUE	TRUE
chr16	16960290	16960521	Nanog_1k_peak_7027	154	.	10.7928	18.8708	15.4502	90	FALSE	TRUE
chr16	19404523	19404860	Nanog_1k_peak_7051	628	.	16.0744	67.8648	62.8955	210	FALSE	TRUE
chr16	19411011	19411829	Nanog_1k_peak_7053	466	.	13.8311	51.2111	46.6976	272	TRUE	FALSE
chr16	19536448	19536637	Nanog_1k_peak_7062	184	.	10.0283	22.0158	18.4599	120	FALSE	FALSE
chr16	19833351	19833496	Nanog_1k_peak_7063	324	.	18.4954	36.549	32.4755	94	FALSE	FALSE
chr16	19887704	19887886	Nanog_1k_peak_7065	316	.	17.3338	35.6468	31.6033	114	TRUE	FALSE
chr16	20189434	20189691	Nanog_1k_peak_7067	242	.	13.5915	28.0154	24.2304	110	TRUE	TRUE
chr16	20198201	20198363	Nanog_1k_peak_7069	298	.	14.4294	33.8648	29.8778	57	FALSE	TRUE
chr16	20294255	20294568	Nanog_1k_peak_7071	195	.	12.2962	23.1529	19.5497	152	FALSE	TRUE
chr16	20523774	20523972	Nanog_1k_peak_7076	153	.	10.2335	18.7148	15.3007	80	FALSE	TRUE
chr16	20564096	20564254	Nanog_1k_peak_7079	149	.	10.2971	18.3829	14.9844	113	TRUE	TRUE
chr16	20739290	20739593	Nanog_1k_peak_7082	305	.	15.646	34.5814	30.5718	179	FALSE	FALSE
chr16	20870914	20871085	Nanog_1k_peak_7083	181	.	12.1407	21.6998	18.1575	103	FALSE	TRUE
chr16	20896467	20896633	Nanog_1k_peak_7086	272	.	12.8278	31.1132	27.218	64	FALSE	FALSE
chr16	21047625	21047962	Nanog_1k_peak_7092	237	.	11.5105	27.5368	23.7686	73	TRUE	TRUE
chr16	21056861	21057196	Nanog_1k_peak_7094	539	.	21.8481	58.688	53.9679	218	TRUE	FALSE
chr16	21079289	21079519	Nanog_1k_peak_7095	167	.	11.1251	20.228	16.7478	175	TRUE	TRUE
chr16	21489518	21489696	Nanog_1k_peak_7098	171	.	11.6055	20.6922	17.1918	40	FALSE	TRUE
chr16	21671785	21672137	Nanog_1k_peak_7103	232	.	11.8861	26.9595	23.2125	234	TRUE	TRUE
chr16	21912241	21912389	Nanog_1k_peak_7109	433	.	19.6694	47.7751	43.3666	77	FALSE	FALSE
chr16	22292401	22292782	Nanog_1k_peak_7118	203	.	11.5402	24.0067	20.3692	282	FALSE	FALSE
chr16	22987079	22987236	Nanog_1k_peak_7128	202	.	13.0994	23.8516	20.2207	103	FALSE	FALSE
chr16	23275152	23275555	Nanog_1k_peak_7130	201	.	11.4131	23.7944	20.1654	314	FALSE	TRUE
chr16	23379085	23379272	Nanog_1k_peak_7136	178	.	12.0892	21.3689	17.8406	42	TRUE	TRUE
chr16	23958800	23959174	Nanog_1k_peak_7143	867	.	21.4169	92.2537	86.7403	220	FALSE	FALSE
chr16	23991160	23991476	Nanog_1k_peak_7149	351	.	13.9865	39.3273	35.1698	158	FALSE	FALSE
chr16	24001608	24001843	Nanog_1k_peak_7150	199	.	11.9729	23.6175	19.9957	139	FALSE	TRUE
chr16	24198724	24199100	Nanog_1k_peak_7152	194	.	10.6565	23.0911	19.491	199	FALSE	TRUE
chr16	24322080	24322439	Nanog_1k_peak_7157	183	.	11.2869	21.9433	18.3904	81	FALSE	TRUE
chr16	24721261	24721382	Nanog_1k_peak_7162	150	.	10.5767	18.4821	15.0788	48	FALSE	TRUE
chr16	24751297	24751559	Nanog_1k_peak_7163	153	.	10.7108	18.7224	15.3078	43	FALSE	TRUE
chr16	24832050	24832146	Nanog_1k_peak_7164	178	.	11.5475	21.3987	17.8688	51	FALSE	TRUE
chr16	25145983	25146103	Nanog_1k_peak_7167	176	.	12.032	21.1635	17.6433	67	FALSE	FALSE
chr16	25259987	25260246	Nanog_1k_peak_7170	416	.	18.1833	46.0144	41.6609	104	FALSE	FALSE
chr16	25609640	25609802	Nanog_1k_peak_7176	177	.	10.9044	21.307	17.7812	59	FALSE	TRUE
chr16	25921763	25921895	Nanog_1k_peak_7181	185	.	12.4281	22.1022	18.5419	67	FALSE	FALSE
chr16	26136367	26136605	Nanog_1k_peak_7187	180	.	10.1133	21.607	18.0686	193	FALSE	TRUE
chr16	26270697	26270936	Nanog_1k_peak_7190	254	.	11.1336	29.3282	25.4962	136	FALSE	TRUE
chr16	26277428	26277686	Nanog_1k_peak_7192	179	.	10.3485	21.4549	17.9226	118	FALSE	TRUE
chr16	26358598	26358833	Nanog_1k_peak_7202	194	.	10.9894	23.0854	19.4858	177	FALSE	TRUE
chr16	26437565	26437705	Nanog_1k_peak_7204	158	.	10.2821	19.2667	15.8287	88	FALSE	TRUE
chr16	26538977	26539138	Nanog_1k_peak_7205	140	.	10.2846	17.3831	14.0304	61	FALSE	TRUE
chr16	26676535	26676741	Nanog_1k_peak_7209	381	.	16.9635	42.4279	38.1763	125	TRUE	TRUE
chr16	27191362	27191597	Nanog_1k_peak_7221	355	.	15.783	39.6711	35.5029	112	FALSE	FALSE
chr16	27570782	27571002	Nanog_1k_peak_7228	185	.	10.7204	22.0772	18.5183	93	TRUE	TRUE
chr16	27593517	27593730	Nanog_1k_peak_7231	404	.	20.0221	44.7421	40.4234	84	FALSE	FALSE
chr16	27831548	27831782	Nanog_1k_peak_7234	715	.	21.2529	76.7081	71.5122	122	TRUE	FALSE
chr16	29042804	29042965	Nanog_1k_peak_7255	153	.	10.7108	18.7224	15.3078	97	FALSE	TRUE
chr16	29194481	29194660	Nanog_1k_peak_7258	410	.	20.3976	45.3968	41.0603	67	FALSE	TRUE
chr16	29243667	29244047	Nanog_1k_peak_7263	195	.	11.048	23.1836	19.5795	136	TRUE	FALSE
chr16	29361021	29361377	Nanog_1k_peak_7266	585	.	13.7467	63.3625	58.5144	114	FALSE	FALSE
chr16	29376301	29376456	Nanog_1k_peak_7268	149	.	10.4719	18.2956	14.9011	97	TRUE	TRUE
chr16	29450247	29450521	Nanog_1k_peak_7269	278	.	15.7429	31.7155	27.8014	218	FALSE	FALSE
chr16	30002509	30002808	Nanog_1k_peak_7285	190	.	11.0786	22.6747	19.0914	154	FALSE	TRUE
chr16	30071107	30071307	Nanog_1k_peak_7289	176	.	10.5193	21.1981	17.6764	108	FALSE	TRUE
chr16	30148361	30148631	Nanog_1k_peak_7292	586	.	23.1858	63.528	58.6751	94	FALSE	FALSE
chr16	30330055	30330201	Nanog_1k_peak_7297	582	.	21.916	63.0489	58.2104	65	FALSE	FALSE
chr16	30330463	30330898	Nanog_1k_peak_7298	255	.	12.5814	29.3991	25.5643	399	FALSE	FALSE
chr16	30343802	30343965	Nanog_1k_peak_7299	727	.	30.6096	77.9974	72.7735	130	FALSE	FALSE
chr16	30421216	30421375	Nanog_1k_peak_7300	140	.	10.132	17.3525	14.0011	76	FALSE	TRUE
chr16	30445474	30445690	Nanog_1k_peak_7303	216	.	13.2563	25.3007	21.6148	170	FALSE	TRUE
chr16	30625699	30625911	Nanog_1k_peak_7305	189	.	12.4111	22.529	18.9519	138	FALSE	TRUE
chr16	30665920	30666307	Nanog_1k_peak_7306	196	.	12.0849	23.2821	19.6741	177	TRUE	TRUE
chr16	30954752	30955103	Nanog_1k_peak_7308	195	.	12.0053	23.1476	19.545	225	FALSE	TRUE
chr16	31010649	31010825	Nanog_1k_peak_7310	198	.	10.2285	23.4944	19.8776	79	FALSE	TRUE
chr16	31454438	31454765	Nanog_1k_peak_7315	249	.	11.8641	28.7827	24.9696	82	FALSE	TRUE
chr16	32183947	32184078	Nanog_1k_peak_7329	163	.	10.306	19.8011	16.3392	87	TRUE	TRUE
chr16	32279314	32279454	Nanog_1k_peak_7332	137	.	10.2189	17.1353	13.7944	78	TRUE	TRUE
chr16	32590749	32590974	Nanog_1k_peak_7339	160	.	11.2494	19.4833	16.035	60	FALSE	TRUE
chr16	32597825	32598026	Nanog_1k_peak_7340	202	.	12.7154	23.8855	20.2526	131	FALSE	TRUE
chr16	32804597	32804928	Nanog_1k_peak_7351	306	.	12.583	34.6362	30.6249	227	TRUE	TRUE
chr16	32814861	32815130	Nanog_1k_peak_7353	140	.	10.1579	17.3993	14.0454	231	TRUE	TRUE
chr16	33106567	33106867	Nanog_1k_peak_7356	349	.	11.8443	39.1277	34.9764	149	FALSE	FALSE
chr16	33163648	33163829	Nanog_1k_peak_7360	179	.	11.8507	21.504	17.97	41	TRUE	TRUE
chr16	33394631	33394979	Nanog_1k_peak_7361	262	.	14.8394	30.137	26.2757	113	TRUE	TRUE
chr16	33598784	33598998	Nanog_1k_peak_7367	378	.	15.0874	42.077	37.8356	52	TRUE	FALSE
chr16	34033564	34033913	Nanog_1k_peak_7376	206	.	11.6922	24.2602	20.6136	144	FALSE	TRUE
chr16	34040928	34041435	Nanog_1k_peak_7377	407	.	12.6949	45.0817	40.7539	340	TRUE	FALSE
chr16	34418239	34418638	Nanog_1k_peak_7389	196	.	12.0849	23.2821	19.6741	278	FALSE	TRUE
chr16	34528243	34528366	Nanog_1k_peak_7392	274	.	14.137	31.3941	27.49	42	FALSE	FALSE
chr16	34613467	34613885	Nanog_1k_peak_7394	586	.	16.2161	63.4719	58.62	80	FALSE	FALSE
chr16	35044402	35044701	Nanog_1k_peak_7401	189	.	11.9583	22.5713	18.9924	89	TRUE	FALSE
chr16	35115552	35115868	Nanog_1k_peak_7402	270	.	14.2322	30.9166	27.0292	168	FALSE	FALSE
chr16	35426919	35427098	Nanog_1k_peak_7406	146	.	10.0655	17.99	14.6092	100	FALSE	TRUE
chr16	35497541	35497980	Nanog_1k_peak_7412	558	.	15.6342	60.5817	55.8085	255	FALSE	FALSE
chr16	35508753	35508862	Nanog_1k_peak_7415	258	.	11.3514	29.7367	25.8889	50	FALSE	TRUE
chr16	35518165	35518569	Nanog_1k_peak_7417	1059	.	26.4268	111.751	105.904	245	TRUE	FALSE
chr16	35532253	35532572	Nanog_1k_peak_7418	208	.	11.1583	24.5216	20.8652	153	FALSE	FALSE
chr16	35669191	35669428	Nanog_1k_peak_7422	300	.	17.0284	34.0617	30.0687	57	FALSE	FALSE
chr16	36062384	36062626	Nanog_1k_peak_7426	339	.	11.0996	38.103	33.9816	143	TRUE	TRUE
chr16	36065475	36065872	Nanog_1k_peak_7427	471	.	12.0342	51.641	47.1155	242	TRUE	FALSE
chr16	36223253	36223372	Nanog_1k_peak_7433	136	.	10.0978	16.9497	13.6173	59	FALSE	FALSE
chr16	36640868	36641111	Nanog_1k_peak_7436	212	.	13.0663	24.9673	21.2939	161	FALSE	TRUE
chr16	36714664	36714773	Nanog_1k_peak_7438	149	.	10.4979	18.3418	14.9449	36	TRUE	TRUE
chr16	36826968	36827064	Nanog_1k_peak_7442	199	.	12.9557	23.5687	19.9492	45	TRUE	TRUE
chr16	37767868	37768139	Nanog_1k_peak_7450	188	.	11.8766	22.4319	18.8584	169	TRUE	TRUE
chr16	37793444	37793643	Nanog_1k_peak_7451	158	.	10.8199	19.2847	15.8459	168	FALSE	TRUE
chr16	38936118	38936407	Nanog_1k_peak_7463	313	.	11.3061	35.3608	31.3262	124	FALSE	TRUE
chr16	39195181	39195288	Nanog_1k_peak_7469	295	.	15.7905	33.5454	29.5691	60	FALSE	TRUE
chr16	39211919	39212349	Nanog_1k_peak_7470	440	.	16.9699	48.5146	44.0834	283	FALSE	FALSE
chr16	39230932	39231169	Nanog_1k_peak_7471	161	.	10.1854	19.6014	16.148	120	TRUE	TRUE
chr16	39242182	39242333	Nanog_1k_peak_7472	196	.	12.6009	23.2533	19.6462	96	FALSE	TRUE
chr16	39248951	39249193	Nanog_1k_peak_7473	162	.	11.0605	19.7083	16.2502	195	FALSE	TRUE
chr16	39408421	39408820	Nanog_1k_peak_7479	252	.	12.7805	29.1054	25.2808	225	FALSE	TRUE
chr16	39422547	39422770	Nanog_1k_peak_7481	340	.	16.1863	38.2184	34.0937	109	FALSE	FALSE
chr16	39476487	39476743	Nanog_1k_peak_7484	261	.	12.537	29.961	26.1055	115	FALSE	TRUE
chr16	39477807	39478034	Nanog_1k_peak_7485	186	.	10.1226	22.1781	18.6149	70	FALSE	TRUE
chr16	39605515	39605767	Nanog_1k_peak_7486	276	.	15.6287	31.5133	27.6055	126	FALSE	TRUE
chr16	39802251	39802440	Nanog_1k_peak_7490	178	.	11.7622	21.3455	17.8181	130	TRUE	TRUE
chr16	40043282	40043444	Nanog_1k_peak_7495	269	.	15.2598	30.8657	26.9802	67	FALSE	FALSE
chr16	40090453	40090688	Nanog_1k_peak_7496	404	.	13.5096	44.765	40.446	104	FALSE	FALSE
chr16	40090996	40091361	Nanog_1k_peak_7497	504	.	15.5625	55.0322	50.4118	224	FALSE	FALSE
chr16	40197138	40197265	Nanog_1k_peak_7499	305	.	17.0112	34.5258	30.5176	77	TRUE	FALSE
chr16	40301460	40301730	Nanog_1k_peak_7502	190	.	11.4001	22.662	19.0797	44	FALSE	TRUE
chr16	40377471	40377622	Nanog_1k_peak_7506	160	.	10.4331	19.5178	16.068	93	FALSE	FALSE
chr16	40560446	40560703	Nanog_1k_peak_7513	532	.	21.9131	57.9658	53.2659	137	FALSE	FALSE
chr16	40576211	40576362	Nanog_1k_peak_7514	270	.	14.2603	30.9638	27.0747	36	TRUE	TRUE
chr16	40755576	40755936	Nanog_1k_peak_7518	324	.	14.005	36.5573	32.4838	242	FALSE	TRUE
chr16	40764793	40765012	Nanog_1k_peak_7520	269	.	14.9304	30.8695	26.984	85	TRUE	FALSE
chr16	41296273	41296465	Nanog_1k_peak_7532	284	.	15.8094	32.3849	28.4484	86	FALSE	FALSE
chr16	41508850	41509138	Nanog_1k_peak_7537	334	.	13.0759	37.6043	33.4978	162	TRUE	TRUE
chr16	41989444	41989648	Nanog_1k_peak_7545	266	.	10.8026	30.545	26.6704	106	TRUE	TRUE
chr16	41990085	41990318	Nanog_1k_peak_7546	722	.	21.6438	77.4874	72.2748	113	TRUE	FALSE
chr16	42148618	42149086	Nanog_1k_peak_7554	377	.	14.2417	41.9469	37.7094	412	FALSE	FALSE
chr16	42190032	42190309	Nanog_1k_peak_7555	282	.	15.002	32.2105	28.2796	101	FALSE	TRUE
chr16	42287028	42287482	Nanog_1k_peak_7557	211	.	11.6556	24.776	21.1096	233	TRUE	TRUE
chr16	42389530	42389795	Nanog_1k_peak_7558	801	.	28.0152	85.5426	80.1625	134	FALSE	FALSE
chr16	42520769	42521006	Nanog_1k_peak_7561	250	.	10.8694	28.828	25.0135	88	FALSE	TRUE
chr16	43400810	43401028	Nanog_1k_peak_7573	523	.	22.8046	57.0203	52.3471	100	FALSE	FALSE
chr16	44417195	44417547	Nanog_1k_peak_7582	198	.	11.8982	23.4925	19.8757	143	FALSE	TRUE
chr16	45236086	45236353	Nanog_1k_peak_7591	276	.	15.3048	31.511	27.6032	144	TRUE	FALSE
chr16	45326902	45327016	Nanog_1k_peak_7592	174	.	11.9596	20.9993	17.4856	44	TRUE	TRUE
chr16	45859708	45859941	Nanog_1k_peak_7597	254	.	15.1836	29.259	25.4292	119	FALSE	TRUE
chr16	45930694	45930965	Nanog_1k_peak_7598	260	.	15.0276	29.9199	26.066	203	FALSE	TRUE
chr16	46111687	46112018	Nanog_1k_peak_7601	538	.	20.3087	58.5219	53.8063	114	FALSE	FALSE
chr16	46141883	46142112	Nanog_1k_peak_7602	217	.	13.5749	25.4377	21.7463	98	FALSE	TRUE
chr16	46250328	46250480	Nanog_1k_peak_7605	270	.	12.0259	30.981	27.0912	88	TRUE	TRUE
chr16	46269260	46269578	Nanog_1k_peak_7606	216	.	13.5397	25.3726	21.6836	165	FALSE	TRUE
chr16	46720657	46720746	Nanog_1k_peak_7611	162	.	11.3781	19.7466	16.2868	37	FALSE	TRUE
chr16	48046959	48047266	Nanog_1k_peak_7627	307	.	12.6487	34.7597	30.744	149	FALSE	FALSE
chr16	48202974	48203160	Nanog_1k_peak_7629	148	.	10.6976	18.2137	14.8227	109	FALSE	TRUE
chr16	49646031	49646142	Nanog_1k_peak_7647	164	.	10.9194	19.8745	16.4095	65	FALSE	TRUE
chr16	50132801	50132913	Nanog_1k_peak_7649	201	.	13.0632	23.7799	20.1516	51	FALSE	FALSE
chr16	50229146	50229439	Nanog_1k_peak_7651	377	.	18.8012	41.9519	37.7142	133	FALSE	FALSE
chr16	50237951	50238102	Nanog_1k_peak_7652	151	.	10.8532	18.5397	15.1342	99	TRUE	TRUE
chr16	50434026	50434258	Nanog_1k_peak_7659	183	.	12.0934	21.943	18.3904	169	FALSE	TRUE
chr16	51266079	51266287	Nanog_1k_peak_7665	189	.	12.1692	22.4812	18.9058	149	FALSE	TRUE
chr16	51272457	51272621	Nanog_1k_peak_7667	190	.	12.4767	22.6517	19.0697	63	FALSE	TRUE
chr16	51383383	51383619	Nanog_1k_peak_7669	311	.	16.4069	35.2229	31.1926	158	FALSE	FALSE
chr16	51490787	51490981	Nanog_1k_peak_7672	148	.	10.6189	18.2508	14.8579	56	FALSE	TRUE
chr16	51512835	51513212	Nanog_1k_peak_7674	210	.	13.3807	24.704	21.0406	204	FALSE	FALSE
chr16	51725728	51725854	Nanog_1k_peak_7679	193	.	12.1814	22.9546	19.3602	38	FALSE	TRUE
chr16	52733341	52733545	Nanog_1k_peak_7689	142	.	10.3993	17.6092	14.2458	86	FALSE	TRUE
chr16	52846892	52847039	Nanog_1k_peak_7690	135	.	10.0808	16.9081	13.5783	76	FALSE	TRUE
chr16	53480885	53481000	Nanog_1k_peak_7695	147	.	10.6569	18.1162	14.7297	73	FALSE	TRUE
chr16	54051566	54051753	Nanog_1k_peak_7699	188	.	11.5735	22.4219	18.8488	135	TRUE	TRUE
chr16	54869097	54869400	Nanog_1k_peak_7706	228	.	12.3715	26.5669	22.8342	158	FALSE	TRUE
chr16	54937548	54937753	Nanog_1k_peak_7708	150	.	10.5767	18.4821	15.0788	155	FALSE	TRUE
chr17	111746	112035	Nanog_1k_peak_7710	274	.	12.2115	31.3185	27.4168	143	FALSE	FALSE
chr17	117856	118061	Nanog_1k_peak_7713	223	.	10.6959	26.0835	22.3691	139	FALSE	TRUE
chr17	1642398	1642616	Nanog_1k_peak_7727	279	.	15.8199	31.8524	27.9339	69	FALSE	FALSE
chr17	1995019	1995280	Nanog_1k_peak_7730	151	.	10.6299	18.5772	15.1699	182	FALSE	TRUE
chr17	2128082	2128179	Nanog_1k_peak_7732	173	.	11.8188	20.8193	17.3132	52	FALSE	TRUE
chr17	2156875	2157055	Nanog_1k_peak_7733	145	.	10.4515	17.9374	14.5595	46	TRUE	TRUE
chr17	2432942	2433211	Nanog_1k_peak_7736	162	.	11.2226	19.6642	16.208	203	FALSE	TRUE
chr17	3990072	3990283	Nanog_1k_peak_7748	190	.	12.229	22.5871	19.0075	126	TRUE	FALSE
chr17	4181736	4182003	Nanog_1k_peak_7750	215	.	13.1924	25.1882	21.5063	133	TRUE	TRUE
chr17	4317460	4317817	Nanog_1k_peak_7755	154	.	10.8204	18.921	15.4978	71	FALSE	FALSE
chr17	4388055	4388404	Nanog_1k_peak_7756	207	.	11.8032	24.4454	20.7921	204	FALSE	TRUE
chr17	4398272	4398493	Nanog_1k_peak_7757	167	.	11.3696	20.2618	16.7803	125	TRUE	TRUE
chr17	5524722	5524913	Nanog_1k_peak_7767	158	.	10.7938	19.2392	15.802	111	FALSE	TRUE
chr17	5539816	5540076	Nanog_1k_peak_7768	193	.	12.6436	22.967	19.3722	194	FALSE	TRUE
chr17	5575312	5575456	Nanog_1k_peak_7769	151	.	10.7917	18.58	15.1725	38	FALSE	TRUE
chr17	5633092	5633319	Nanog_1k_peak_7771	163	.	11.2825	19.7772	16.3163	186	FALSE	FALSE
chr17	6076188	6076331	Nanog_1k_peak_7780	196	.	12.7805	23.2287	19.6231	67	FALSE	TRUE
chr17	6508135	6508251	Nanog_1k_peak_7786	317	.	17.4205	35.8034	31.7548	46	FALSE	FALSE
chr17	8015113	8015226	Nanog_1k_peak_7806	188	.	10.6141	22.4547	18.8804	50	TRUE	TRUE
chr17	8317882	8318417	Nanog_1k_peak_7813	708	.	15.871	75.9992	70.824	188	FALSE	FALSE
chr17	8727107	8727281	Nanog_1k_peak_7817	171	.	11.0842	20.6094	17.1124	103	FALSE	TRUE
chr17	8824557	8824662	Nanog_1k_peak_7821	158	.	11.1785	19.2479	15.8104	76	TRUE	TRUE
chr17	9010548	9010768	Nanog_1k_peak_7826	162	.	11.0605	19.7083	16.2502	132	FALSE	TRUE
chr17	9431209	9431415	Nanog_1k_peak_7828	159	.	11.2459	19.3998	15.9555	90	FALSE	TRUE
chr17	9597873	9598153	Nanog_1k_peak_7830	270	.	11.6757	30.975	27.0853	248	FALSE	TRUE
chr17	9895830	9896165	Nanog_1k_peak_7832	178	.	11.5475	21.3987	17.8688	227	TRUE	FALSE
chr17	10315719	10315938	Nanog_1k_peak_7838	486	.	18.7253	53.248	48.6765	97	FALSE	FALSE
chr17	10566359	10566501	Nanog_1k_peak_7846	196	.	12.3837	23.3047	19.6958	49	FALSE	TRUE
chr17	10933687	10933876	Nanog_1k_peak_7858	191	.	10.1465	22.7817	19.1942	74	TRUE	TRUE
chr17	10948816	10949038	Nanog_1k_peak_7860	136	.	10.0626	16.9543	13.6215	100	FALSE	TRUE
chr17	10992304	10992777	Nanog_1k_peak_7862	194	.	10.2864	23.0249	19.4277	197	FALSE	TRUE
chr17	11103151	11103404	Nanog_1k_peak_7868	158	.	10.6009	19.3327	15.8916	152	FALSE	TRUE
chr17	11418519	11418879	Nanog_1k_peak_7876	260	.	13.9899	29.8863	26.0332	273	TRUE	TRUE
chr17	11738033	11738533	Nanog_1k_peak_7884	423	.	14.8064	46.6939	42.3196	72	FALSE	FALSE
chr17	11943575	11943789	Nanog_1k_peak_7886	138	.	10.0299	17.1687	13.8257	129	TRUE	TRUE
chr17	12124936	12125168	Nanog_1k_peak_7890	267	.	14.7662	30.5898	26.7136	79	TRUE	FALSE
chr17	12253350	12253483	Nanog_1k_peak_7892	229	.	13.792	26.7259	22.9875	64	TRUE	TRUE
chr17	13398119	13398301	Nanog_1k_peak_7906	160	.	11.28	19.4771	16.0291	106	TRUE	TRUE
chr17	13398426	13398551	Nanog_1k_peak_7907	176	.	12.032	21.1635	17.6433	64	FALSE	TRUE
chr17	13556966	13557165	Nanog_1k_peak_7911	193	.	10.9314	22.9882	19.3924	114	FALSE	FALSE
chr17	13876742	13876957	Nanog_1k_peak_7914	175	.	11.3628	21.0825	17.5656	151	FALSE	TRUE
chr17	14045660	14045846	Nanog_1k_peak_7918	240	.	14.9047	27.8506	24.0717	48	FALSE	TRUE
chr17	14280131	14280448	Nanog_1k_peak_7923	384	.	15.4137	42.6706	38.4131	252	FALSE	FALSE
chr17	14664556	14664922	Nanog_1k_peak_7930	137	.	10.0046	17.1235	13.7832	95	TRUE	TRUE
chr17	14705045	14705240	Nanog_1k_peak_7937	225	.	14.0121	26.2602	22.5388	90	FALSE	TRUE
chr17	15667283	15667445	Nanog_1k_peak_7948	136	.	10.0978	16.9497	13.6173	59	FALSE	TRUE
chr17	16095169	16095500	Nanog_1k_peak_7957	265	.	12.0658	30.4113	26.5407	244	FALSE	TRUE
chr17	16110395	16110547	Nanog_1k_peak_7958	204	.	12.8405	24.1069	20.4658	34	TRUE	TRUE
chr17	16369434	16369666	Nanog_1k_peak_7962	462	.	20.531	50.7763	46.276	114	TRUE	FALSE
chr17	16755137	16755304	Nanog_1k_peak_7970	147	.	10.5625	18.1447	14.7569	79	FALSE	TRUE
chr17	16993927	16994128	Nanog_1k_peak_7975	260	.	14.9914	29.8559	26.0036	135	TRUE	FALSE
chr17	17124809	17125191	Nanog_1k_peak_7978	157	.	10.5066	19.1735	15.7388	126	FALSE	TRUE
chr17	17951671	17951878	Nanog_1k_peak_7984	214	.	10.187	25.1547	21.4742	133	FALSE	TRUE
chr17	17952092	17952328	Nanog_1k_peak_7985	375	.	14.5358	41.7832	37.5508	89	FALSE	TRUE
chr17	17970825	17971040	Nanog_1k_peak_7988	307	.	14.9554	34.7559	30.7405	113	FALSE	TRUE
chr17	18031641	18031892	Nanog_1k_peak_7990	363	.	17.5935	40.5942	36.3977	109	FALSE	FALSE
chr17	18182108	18182278	Nanog_1k_peak_7997	156	.	11.0617	19.107	15.6756	81	FALSE	TRUE
chr17	18415516	18415675	Nanog_1k_peak_8004	159	.	10.0676	19.4064	15.9618	80	FALSE	TRUE
chr17	18415983	18416128	Nanog_1k_peak_8005	229	.	13.1239	26.6531	22.9173	98	FALSE	TRUE
chr17	18430877	18431046	Nanog_1k_peak_8006	216	.	13.2563	25.3007	21.6148	59	TRUE	TRUE
chr17	18553427	18553685	Nanog_1k_peak_8007	189	.	12.5491	22.5036	18.9275	196	FALSE	TRUE
chr17	18623286	18623658	Nanog_1k_peak_8009	548	.	14.8656	59.5509	54.8052	180	TRUE	FALSE
chr17	18926264	18926498	Nanog_1k_peak_8014	236	.	13.9216	27.4616	23.6962	45	TRUE	TRUE
chr17	19347677	19348134	Nanog_1k_peak_8031	958	.	12.654	101.573	95.8835	301	FALSE	FALSE
chr17	19354755	19355109	Nanog_1k_peak_8034	380	.	12.3758	42.3105	38.063	261	FALSE	TRUE
chr17	19407123	19407554	Nanog_1k_peak_8037	402	.	16.0734	44.606	40.2917	302	FALSE	TRUE
chr17	19480900	19481090	Nanog_1k_peak_8038	327	.	17.3212	36.7963	32.7148	132	FALSE	FALSE
chr17	19626309	19626434	Nanog_1k_peak_8040	194	.	12.6776	23.0316	19.4337	59	TRUE	TRUE
chr17	20085066	20085233	Nanog_1k_peak_8045	179	.	12.1239	21.4407	17.9092	125	FALSE	TRUE
chr17	20236228	20236364	Nanog_1k_peak_8047	153	.	10.9101	18.809	15.391	68	FALSE	TRUE
chr17	20398191	20398562	Nanog_1k_peak_8050	210	.	12.313	24.732	21.0674	90	TRUE	TRUE
chr17	20466895	20467071	Nanog_1k_peak_8051	152	.	10.821	18.6365	15.226	115	FALSE	TRUE
chr17	20499094	20499435	Nanog_1k_peak_8054	853	.	20.4022	90.791	85.3041	57	TRUE	FALSE
chr17	20530627	20530831	Nanog_1k_peak_8057	232	.	13.9264	26.9629	23.2157	88	FALSE	TRUE
chr17	20757890	20758096	Nanog_1k_peak_8060	153	.	10.5396	18.7984	15.3808	154	TRUE	TRUE
chr17	20888345	20888714	Nanog_1k_peak_8062	215	.	12.9196	25.2158	21.5326	315	FALSE	FALSE
chr17	20923506	20923679	Nanog_1k_peak_8068	190	.	12.229	22.5871	19.0075	64	FALSE	TRUE
chr17	21078496	21078942	Nanog_1k_peak_8070	268	.	12.2405	30.7247	26.8439	249	FALSE	FALSE
chr17	21199033	21199234	Nanog_1k_peak_8076	302	.	16.5508	34.2553	30.2567	44	FALSE	FALSE
chr17	21260183	21260495	Nanog_1k_peak_8080	155	.	10.6146	18.9278	15.5041	240	FALSE	TRUE
chr17	21277313	21277695	Nanog_1k_peak_8081	615	.	15.8295	66.4848	61.5504	203	FALSE	FALSE
chr17	21289247	21289398	Nanog_1k_peak_8085	341	.	11.7373	38.2353	34.1099	68	FALSE	TRUE
chr17	21290015	21290382	Nanog_1k_peak_8086	625	.	17.3073	67.535	62.5733	161	TRUE	FALSE
chr17	21318335	21318583	Nanog_1k_peak_8087	310	.	17.0368	35.1146	31.0876	99	FALSE	FALSE
chr17	21487670	21488081	Nanog_1k_peak_8090	374	.	15.6681	41.6548	37.4266	244	TRUE	FALSE
chr17	21651334	21651659	Nanog_1k_peak_8094	246	.	13.5174	28.4847	24.6823	226	FALSE	TRUE
chr17	21675543	21675916	Nanog_1k_peak_8099	629	.	17.4636	67.8831	62.9137	131	FALSE	FALSE
chr17	21691755	21691972	Nanog_1k_peak_8100	220	.	13.7176	25.7033	22.0025	69	TRUE	TRUE
chr17	21732050	21732209	Nanog_1k_peak_8102	265	.	12.4388	30.4321	26.5608	84	FALSE	TRUE
chr17	21734407	21734661	Nanog_1k_peak_8103	396	.	16.1105	43.9228	39.6286	114	TRUE	FALSE
chr17	22066582	22066845	Nanog_1k_peak_8125	510	.	21.9976	55.649	51.0126	103	TRUE	FALSE
chr17	22230993	22231129	Nanog_1k_peak_8128	145	.	10.5463	17.9041	14.5276	100	FALSE	TRUE
chr17	22506750	22506970	Nanog_1k_peak_8136	178	.	11.7916	21.398	17.8683	145	FALSE	TRUE
chr17	22518491	22519194	Nanog_1k_peak_8137	561	.	17.2698	60.9791	56.1956	171	FALSE	FALSE
chr17	22535457	22535710	Nanog_1k_peak_8138	385	.	17.2042	42.8391	38.5766	193	FALSE	FALSE
chr17	23278459	23278583	Nanog_1k_peak_8154	159	.	11.1047	19.4436	15.9972	90	FALSE	TRUE
chr17	23287620	23287924	Nanog_1k_peak_8155	149	.	10.2499	18.3026	14.9076	115	FALSE	TRUE
chr17	23310453	23310755	Nanog_1k_peak_8159	532	.	13.6308	57.9679	53.268	172	TRUE	FALSE
chr17	23400254	23400607	Nanog_1k_peak_8165	422	.	13.6894	46.5737	42.2037	114	FALSE	TRUE
chr17	23451524	23451750	Nanog_1k_peak_8168	247	.	13.5721	28.5763	24.7701	60	FALSE	TRUE
chr17	23556579	23556747	Nanog_1k_peak_8170	243	.	13.9799	28.1026	24.3145	69	FALSE	TRUE
chr17	23673152	23673584	Nanog_1k_peak_8173	198	.	10.8715	23.456	19.841	120	TRUE	TRUE
chr17	23755278	23755485	Nanog_1k_peak_8180	189	.	11.3099	22.512	18.9353	75	FALSE	TRUE
chr17	23894795	23894945	Nanog_1k_peak_8186	197	.	12.1385	23.3729	19.761	103	TRUE	TRUE
chr17	23926751	23926955	Nanog_1k_peak_8187	225	.	13.531	26.2691	22.5473	39	FALSE	FALSE
chr17	23966080	23966210	Nanog_1k_peak_8189	245	.	11.9568	28.3188	24.5226	40	TRUE	TRUE
chr17	24053601	24053841	Nanog_1k_peak_8193	301	.	11.6288	34.0966	30.1026	154	TRUE	TRUE
chr17	24064423	24064632	Nanog_1k_peak_8195	219	.	11.4762	25.6547	21.9558	88	TRUE	TRUE
chr17	24324829	24325083	Nanog_1k_peak_8201	202	.	10.782	23.8792	20.2466	152	TRUE	TRUE
chr17	24520185	24520350	Nanog_1k_peak_8204	154	.	10.8204	18.921	15.4978	106	FALSE	TRUE
chr17	24566960	24567129	Nanog_1k_peak_8205	389	.	19.1413	43.2237	38.9485	53	TRUE	FALSE
chr17	24610326	24610691	Nanog_1k_peak_8206	270	.	13.1157	30.9602	27.0712	253	FALSE	TRUE
chr17	25018774	25019336	Nanog_1k_peak_8215	336	.	14.2889	37.7636	33.6526	157	TRUE	TRUE
chr17	25197020	25197215	Nanog_1k_peak_8221	233	.	13.9946	27.0836	23.3322	49	FALSE	FALSE
chr17	25367646	25367860	Nanog_1k_peak_8226	319	.	16.5178	36.0544	31.9965	127	TRUE	TRUE
chr17	25709933	25710106	Nanog_1k_peak_8232	142	.	10.2893	17.6384	14.2734	112	FALSE	TRUE
chr17	25715639	25716296	Nanog_1k_peak_8233	179	.	10.3485	21.4549	17.9226	157	FALSE	TRUE
chr17	25724859	25725063	Nanog_1k_peak_8234	243	.	14.602	28.1772	24.3863	92	FALSE	TRUE
chr17	25831328	25831658	Nanog_1k_peak_8235	173	.	11.2599	20.9072	17.3978	286	FALSE	TRUE
chr17	25856541	25856782	Nanog_1k_peak_8236	337	.	15.5498	37.8429	33.7294	75	FALSE	FALSE
chr17	26098350	26098459	Nanog_1k_peak_8242	146	.	10.2934	17.981	14.6007	28	FALSE	TRUE
chr17	26111559	26111995	Nanog_1k_peak_8243	238	.	13.9869	27.5747	23.8051	174	FALSE	TRUE
chr17	26123798	26124148	Nanog_1k_peak_8244	193	.	10.9122	22.956	19.3614	123	FALSE	TRUE
chr17	26125919	26126041	Nanog_1k_peak_8245	216	.	11.6421	25.3408	21.6533	47	TRUE	TRUE
chr17	26271174	26271300	Nanog_1k_peak_8246	275	.	15.591	31.4468	27.5413	54	FALSE	FALSE
chr17	26349651	26349935	Nanog_1k_peak_8250	260	.	15.513	29.8903	26.0372	227	FALSE	TRUE
chr17	26416064	26416462	Nanog_1k_peak_8252	220	.	12.8985	25.7151	22.014	118	TRUE	FALSE
chr17	27185239	27185685	Nanog_1k_peak_8263	304	.	14.386	34.4678	30.4614	242	TRUE	FALSE
chr17	27285867	27286491	Nanog_1k_peak_8268	516	.	16.5639	56.3422	51.6874	250	FALSE	FALSE
chr17	27499224	27499553	Nanog_1k_peak_8271	156	.	10.6906	19.0596	15.6301	99	TRUE	TRUE
chr17	27693601	27693928	Nanog_1k_peak_8278	380	.	13.3552	42.3256	38.0777	213	FALSE	TRUE
chr17	27723200	27723452	Nanog_1k_peak_8280	491	.	20.4007	53.7391	49.1544	146	FALSE	FALSE
chr17	28101957	28102096	Nanog_1k_peak_8283	188	.	11.8497	22.3859	18.8142	78	TRUE	TRUE
chr17	28111400	28111668	Nanog_1k_peak_8284	203	.	10.5382	24.0372	20.3989	125	FALSE	TRUE
chr17	28308281	28308473	Nanog_1k_peak_8289	207	.	13.0328	24.4499	20.7963	81	FALSE	TRUE
chr17	28341420	28341521	Nanog_1k_peak_8290	222	.	13.6534	26.0066	22.2948	59	FALSE	FALSE
chr17	28371309	28371617	Nanog_1k_peak_8292	324	.	16.3835	36.4878	32.4166	194	FALSE	TRUE
chr17	28599477	28599677	Nanog_1k_peak_8297	259	.	14.2946	29.7909	25.9414	143	FALSE	TRUE
chr17	28862437	28862795	Nanog_1k_peak_8304	480	.	17.4993	52.6221	48.0699	217	FALSE	FALSE
chr17	29095921	29096153	Nanog_1k_peak_8320	309	.	15.093	34.9883	30.9659	170	FALSE	TRUE
chr17	29104014	29104164	Nanog_1k_peak_8322	293	.	12.2604	33.3666	29.3962	59	FALSE	TRUE
chr17	29211622	29211889	Nanog_1k_peak_8328	194	.	11.6083	23.0088	19.4122	155	FALSE	TRUE
chr17	29227208	29227541	Nanog_1k_peak_8329	209	.	12.2624	24.6474	20.986	148	FALSE	TRUE
chr17	29441853	29442091	Nanog_1k_peak_8336	161	.	11.3486	19.6347	16.1797	168	FALSE	TRUE
chr17	29638040	29638211	Nanog_1k_peak_8339	185	.	10.4009	22.0949	18.5354	62	TRUE	TRUE
chr17	29723234	29723684	Nanog_1k_peak_8345	155	.	10.6398	18.9715	15.5458	243	FALSE	TRUE
chr17	29733055	29733343	Nanog_1k_peak_8347	302	.	14.2646	34.26	30.2609	123	FALSE	TRUE
chr17	30329406	30329562	Nanog_1k_peak_8366	148	.	10.4203	18.2043	14.814	94	FALSE	TRUE
chr17	30360610	30360916	Nanog_1k_peak_8368	302	.	11.7089	34.2573	30.2585	84	TRUE	FALSE
chr17	30601378	30601654	Nanog_1k_peak_8381	205	.	10.651	24.2338	20.5882	69	FALSE	TRUE
chr17	30662670	30662843	Nanog_1k_peak_8382	158	.	11.0466	19.3359	15.8945	111	FALSE	TRUE
chr17	30908735	30908878	Nanog_1k_peak_8388	138	.	10.2002	17.2187	13.8738	72	FALSE	TRUE
chr17	30984084	30984418	Nanog_1k_peak_8389	182	.	11.1945	21.7893	18.2433	87	FALSE	FALSE
chr17	31138502	31138719	Nanog_1k_peak_8397	692	.	22.8388	74.4002	69.263	139	FALSE	FALSE
chr17	31147932	31148324	Nanog_1k_peak_8398	297	.	14.3788	33.779	29.7944	148	FALSE	TRUE
chr17	31226027	31226414	Nanog_1k_peak_8400	438	.	14.1535	48.2889	43.865	160	TRUE	FALSE
chr17	31656315	31656435	Nanog_1k_peak_8408	236	.	11.0716	27.3667	23.6047	68	FALSE	FALSE
chr17	31673855	31674332	Nanog_1k_peak_8413	211	.	12.0316	24.8264	21.1582	83	TRUE	TRUE
chr17	32365016	32365190	Nanog_1k_peak_8429	249	.	13.7107	28.8087	24.995	125	FALSE	TRUE
chr17	32370064	32370269	Nanog_1k_peak_8430	196	.	11.4178	23.2395	19.6333	128	FALSE	TRUE
chr17	32424576	32424891	Nanog_1k_peak_8433	207	.	11.0664	24.3651	20.7143	172	TRUE	TRUE
chr17	32474938	32475105	Nanog_1k_peak_8435	160	.	10.9255	19.47	16.0224	82	FALSE	TRUE
chr17	32500208	32500442	Nanog_1k_peak_8436	247	.	13.8834	28.5073	24.7045	168	FALSE	TRUE
chr17	32645467	32645741	Nanog_1k_peak_8441	193	.	12.1531	22.9057	19.3134	117	FALSE	TRUE
chr17	32679970	32680150	Nanog_1k_peak_8445	222	.	12.393	26.0091	22.2971	70	FALSE	TRUE
chr17	32779455	32779655	Nanog_1k_peak_8448	174	.	11.2854	20.9507	17.4394	108	FALSE	TRUE
chr17	32789347	32789574	Nanog_1k_peak_8450	156	.	10.4369	19.0562	15.627	157	TRUE	TRUE
chr17	33083326	33083885	Nanog_1k_peak_8454	366	.	12.3359	40.8678	36.6633	334	TRUE	TRUE
chr17	33176738	33177061	Nanog_1k_peak_8455	206	.	12.0397	24.2756	20.6282	132	TRUE	TRUE
chr17	33213562	33213779	Nanog_1k_peak_8457	203	.	12.7464	23.9403	20.3052	89	FALSE	TRUE
chr17	33374431	33374773	Nanog_1k_peak_8459	233	.	12.3299	27.1015	23.3493	207	FALSE	TRUE
chr17	33707488	33707645	Nanog_1k_peak_8461	157	.	11.0926	19.1682	15.734	60	FALSE	TRUE
chr17	33837169	33837314	Nanog_1k_peak_8465	294	.	16.0918	33.4555	29.4824	72	FALSE	FALSE
chr17	33972981	33973288	Nanog_1k_peak_8469	206	.	10.6674	24.2622	20.6154	139	FALSE	TRUE
chr17	33999935	34000107	Nanog_1k_peak_8470	190	.	11.3548	22.5867	19.0074	108	FALSE	TRUE
chr17	34030245	34030513	Nanog_1k_peak_8472	559	.	22.5774	60.7784	55.9998	183	FALSE	FALSE
chr17	35174646	35174944	Nanog_1k_peak_8491	746	.	18.7411	79.9541	74.689	183	TRUE	FALSE
chr17	35867060	35867208	Nanog_1k_peak_8505	179	.	12.0103	21.4501	17.9182	96	TRUE	TRUE
chr17	35887167	35887690	Nanog_1k_peak_8507	268	.	10.2889	30.7121	26.8316	162	FALSE	TRUE
chr17	36396012	36396258	Nanog_1k_peak_8511	523	.	19.9181	56.999	52.3262	82	FALSE	FALSE
chr17	36589493	36589695	Nanog_1k_peak_8515	236	.	13.5532	27.377	23.6146	82	FALSE	FALSE
chr17	36794683	36794802	Nanog_1k_peak_8518	245	.	15.063	28.363	24.5652	51	FALSE	TRUE
chr17	36841186	36841327	Nanog_1k_peak_8520	151	.	10.4169	18.5877	15.1797	76	FALSE	TRUE
chr17	37156245	37156425	Nanog_1k_peak_8524	210	.	12.6342	24.7304	21.0659	115	FALSE	FALSE
chr17	37215566	37215781	Nanog_1k_peak_8525	179	.	11.0142	21.4894	17.9563	77	FALSE	TRUE
chr17	37513125	37513366	Nanog_1k_peak_8529	144	.	10.1941	17.8075	14.4352	70	FALSE	TRUE
chr17	37762431	37762651	Nanog_1k_peak_8533	372	.	19.6308	41.5121	37.2887	143	TRUE	FALSE
chr17	38137993	38138229	Nanog_1k_peak_8536	208	.	13.2736	24.4997	20.844	97	FALSE	TRUE
chr17	38235039	38235253	Nanog_1k_peak_8537	721	.	23.9343	77.3237	72.1142	124	FALSE	FALSE
chr17	38247777	38247984	Nanog_1k_peak_8538	381	.	10.5292	42.3608	38.1118	88	FALSE	TRUE
chr17	38254657	38255184	Nanog_1k_peak_8540	432	.	10.0174	47.6245	43.2207	249	FALSE	TRUE
chr17	38270824	38271051	Nanog_1k_peak_8544	365	.	10.1768	40.7875	36.5857	90	FALSE	TRUE
chr17	38272132	38272519	Nanog_1k_peak_8545	368	.	10.7456	41.0492	36.8396	201	FALSE	FALSE
chr17	38442359	38442459	Nanog_1k_peak_8549	145	.	10.5762	17.9648	14.5856	27	FALSE	TRUE
chr17	38829935	38830187	Nanog_1k_peak_8553	175	.	10.4235	21.0385	17.523	105	FALSE	TRUE
chr17	39276010	39276197	Nanog_1k_peak_8558	194	.	12.8618	23.0552	19.4563	75	FALSE	TRUE
chr17	39586084	39586438	Nanog_1k_peak_8564	267	.	13.6957	30.6521	26.7736	105	FALSE	FALSE
chr17	40503076	40503557	Nanog_1k_peak_8577	310	.	11.4761	35.0757	31.0503	243	FALSE	TRUE
chr17	40512453	40512697	Nanog_1k_peak_8580	356	.	12.8131	39.8285	35.6555	127	TRUE	FALSE
chr17	40840331	40840492	Nanog_1k_peak_8585	240	.	14.8067	27.831	24.0527	56	TRUE	TRUE
chr17	41303372	41303775	Nanog_1k_peak_8594	413	.	17.1164	45.6993	41.3544	121	TRUE	FALSE
[truncated: 3,685 more rows]

## Sheet: Nanog dome FitCUT&RUN
chrom	start	end	name	score	strand	signalValue	pValue	qValue	peak	FitCUT&RUN specific	contain nanog motif	dome new peak
chr1	36640	36734	Nanog_dome_peak_2	204	.	12.8915	23.4435	20.4792	56	TRUE	FALSE	TRUE
chr1	93257	93508	Nanog_dome_peak_5	284	.	15.0229	31.6264	28.4887	145	FALSE	FALSE	TRUE
chr1	179361	179525	Nanog_dome_peak_8	433	.	21.8315	46.7601	43.3585	70	TRUE	FALSE	FALSE
chr1	214165	214348	Nanog_dome_peak_10	217	.	13.3796	24.7019	21.7089	82	TRUE	FALSE	TRUE
chr1	643658	643904	Nanog_dome_peak_19	241	.	12.4004	27.2203	24.1719	51	FALSE	FALSE	TRUE
chr1	655832	656074	Nanog_dome_peak_23	531	.	22.6174	56.7022	53.1512	87	FALSE	FALSE	TRUE
chr1	1029181	1029335	Nanog_dome_peak_29	155	.	10.7591	18.3416	15.5066	75	TRUE	FALSE	FALSE
chr1	1143216	1143380	Nanog_dome_peak_32	206	.	13.0805	23.5716	20.6043	58	TRUE	TRUE	TRUE
chr1	1402595	1402781	Nanog_dome_peak_37	413	.	21.0531	44.7279	41.3596	120	TRUE	FALSE	FALSE
chr1	1531284	1531529	Nanog_dome_peak_39	150	.	10.5063	17.8232	15.0028	180	TRUE	TRUE	TRUE
chr1	1626296	1626538	Nanog_dome_peak_41	251	.	12.6091	28.1883	25.1198	51	TRUE	FALSE	TRUE
chr1	1717005	1717226	Nanog_dome_peak_49	637	.	16.9238	67.4775	63.7774	82	FALSE	TRUE	TRUE
chr1	2260157	2260414	Nanog_dome_peak_56	576	.	20.8893	61.2365	57.6224	107	TRUE	FALSE	FALSE
chr1	2261893	2262103	Nanog_dome_peak_57	226	.	11.1102	25.6223	22.6086	146	TRUE	FALSE	TRUE
chr1	2283471	2283637	Nanog_dome_peak_59	373	.	19.7326	40.6623	37.3609	96	TRUE	TRUE	TRUE
chr1	2297033	2297321	Nanog_dome_peak_61	314	.	16.0599	34.6326	31.4374	119	TRUE	FALSE	TRUE
chr1	2308330	2308470	Nanog_dome_peak_63	249	.	14.4922	27.977	24.913	55	TRUE	TRUE	FALSE
chr1	3099975	3100268	Nanog_dome_peak_68	319	.	17.38	35.2042	31.9984	121	TRUE	FALSE	FALSE
chr1	3290970	3291328	Nanog_dome_peak_73	188	.	10.5312	21.7609	18.837	293	TRUE	FALSE	TRUE
chr1	3299805	3300029	Nanog_dome_peak_75	235	.	12.0426	26.6166	23.5813	121	TRUE	FALSE	FALSE
chr1	3305817	3306000	Nanog_dome_peak_76	188	.	12.1783	21.7726	18.8484	97	FALSE	TRUE	TRUE
chr1	3308327	3308562	Nanog_dome_peak_77	173	.	11.5345	20.2595	17.3733	164	TRUE	FALSE	TRUE
chr1	3507008	3507252	Nanog_dome_peak_79	440	.	20.3883	47.4999	44.0869	141	TRUE	TRUE	FALSE
chr1	3516241	3516517	Nanog_dome_peak_80	420	.	19.5873	45.4056	42.0258	180	FALSE	TRUE	FALSE
chr1	3529298	3529542	Nanog_dome_peak_81	178	.	11.8323	20.7152	17.8173	166	TRUE	TRUE	TRUE
chr1	4210518	4210703	Nanog_dome_peak_84	1329	.	43.7107	137.486	132.919	130	FALSE	FALSE	FALSE
chr1	4270496	4270685	Nanog_dome_peak_86	278	.	15.6285	30.9937	27.8683	82	TRUE	FALSE	TRUE
chr1	4637827	4638121	Nanog_dome_peak_90	264	.	14.8131	29.5427	26.4462	123	TRUE	FALSE	TRUE
chr1	5013896	5014033	Nanog_dome_peak_96	178	.	11.8031	20.7879	17.8879	68	FALSE	FALSE	FALSE
chr1	5019502	5019728	Nanog_dome_peak_97	315	.	17.3935	34.7571	31.5597	127	FALSE	FALSE	TRUE
chr1	5132452	5132643	Nanog_dome_peak_99	275	.	15.4664	30.7011	27.5814	81	TRUE	FALSE	TRUE
chr1	5228584	5228755	Nanog_dome_peak_103	204	.	12.474	23.4619	20.4972	77	TRUE	FALSE	TRUE
chr1	5244298	5244882	Nanog_dome_peak_104	929	.	21.1384	96.9992	92.9225	253	FALSE	FALSE	TRUE
chr1	5268581	5269149	Nanog_dome_peak_107	362	.	12.6458	39.4856	36.2039	458	TRUE	FALSE	TRUE
chr1	5274460	5274634	Nanog_dome_peak_109	426	.	10.5152	46.0665	42.6764	57	TRUE	FALSE	FALSE
chr1	5278934	5279293	Nanog_dome_peak_110	1370	.	19.2209	141.646	137.03	168	TRUE	FALSE	FALSE
chr1	5281670	5281985	Nanog_dome_peak_112	796	.	14.081	83.5316	79.622	130	FALSE	FALSE	TRUE
chr1	5296924	5297149	Nanog_dome_peak_114	151	.	10.5997	18.0125	15.187	39	TRUE	TRUE	TRUE
chr1	5315155	5315463	Nanog_dome_peak_116	1340	.	34.0466	138.673	134.093	158	FALSE	FALSE	TRUE
chr1	5323589	5323709	Nanog_dome_peak_117	245	.	14.514	27.5908	24.5346	56	TRUE	FALSE	TRUE
chr1	5407972	5408216	Nanog_dome_peak_121	420	.	18.2924	45.4406	42.0603	127	TRUE	FALSE	TRUE
chr1	5468375	5468551	Nanog_dome_peak_127	237	.	11.7921	26.7988	23.7593	87	FALSE	FALSE	TRUE
chr1	5478037	5478422	Nanog_dome_peak_129	289	.	13.7878	32.1084	28.9614	116	FALSE	TRUE	TRUE
chr1	5530765	5530998	Nanog_dome_peak_133	455	.	13.8179	49.0114	45.5748	129	TRUE	FALSE	TRUE
chr1	5533960	5534143	Nanog_dome_peak_134	595	.	15.1248	63.2165	59.5746	48	TRUE	TRUE	FALSE
chr1	5537592	5537878	Nanog_dome_peak_135	296	.	11.9478	32.7754	29.6155	201	TRUE	FALSE	TRUE
chr1	5664030	5664304	Nanog_dome_peak_137	254	.	13.5419	28.5257	25.4502	143	FALSE	FALSE	TRUE
chr1	5918569	5918853	Nanog_dome_peak_142	254	.	14.5089	28.489	25.4141	76	TRUE	FALSE	TRUE
chr1	5926695	5926972	Nanog_dome_peak_144	141	.	10.063	16.955	14.1584	107	FALSE	TRUE	TRUE
chr1	5965894	5966211	Nanog_dome_peak_146	1985	.	33.1088	203.852	198.529	203	TRUE	TRUE	FALSE
chr1	6143065	6143371	Nanog_dome_peak_157	528	.	21.0236	56.4424	52.8949	142	FALSE	TRUE	TRUE
chr1	6164429	6164665	Nanog_dome_peak_160	778	.	24.8384	81.7498	77.8631	142	TRUE	FALSE	FALSE
chr1	6371100	6371315	Nanog_dome_peak_164	252	.	15.0627	28.3623	25.2903	105	FALSE	FALSE	TRUE
chr1	6457194	6457397	Nanog_dome_peak_165	189	.	12.0354	21.8374	18.9112	112	TRUE	FALSE	TRUE
chr1	6494409	6494704	Nanog_dome_peak_166	535	.	23.3449	57.1394	53.5819	126	TRUE	FALSE	TRUE
chr1	7064923	7065497	Nanog_dome_peak_190	884	.	19.6533	92.4756	88.4536	386	FALSE	FALSE	FALSE
chr1	7247450	7247685	Nanog_dome_peak_193	259	.	14.8093	29.0237	25.9378	125	FALSE	TRUE	TRUE
chr1	7257880	7258125	Nanog_dome_peak_195	196	.	12.4317	22.5674	19.623	183	TRUE	TRUE	FALSE
chr1	7514182	7514431	Nanog_dome_peak_198	326	.	17.7147	35.8309	32.6138	154	TRUE	FALSE	FALSE
chr1	7616811	7617112	Nanog_dome_peak_199	155	.	10.7037	18.4117	15.5741	119	TRUE	FALSE	TRUE
chr1	7640321	7640622	Nanog_dome_peak_202	765	.	26.163	80.3999	76.5306	145	FALSE	FALSE	TRUE
chr1	7659912	7660108	Nanog_dome_peak_204	294	.	15.919	32.5765	29.4204	91	TRUE	FALSE	TRUE
chr1	7677558	7677966	Nanog_dome_peak_207	298	.	10.2523	33.0546	29.8893	243	TRUE	FALSE	TRUE
chr1	7681155	7681326	Nanog_dome_peak_208	452	.	13.3335	48.6381	45.2072	102	FALSE	FALSE	TRUE
chr1	7698240	7698519	Nanog_dome_peak_213	535	.	19.05	57.0903	53.5335	173	FALSE	TRUE	FALSE
chr1	7836027	7836285	Nanog_dome_peak_217	299	.	15.5595	33.1528	29.9856	155	FALSE	FALSE	FALSE
chr1	8140263	8140471	Nanog_dome_peak_224	270	.	13.7635	30.1304	27.0221	128	FALSE	FALSE	TRUE
chr1	8534340	8534585	Nanog_dome_peak_231	274	.	15.3865	30.5579	27.441	76	TRUE	FALSE	FALSE
chr1	8561831	8562082	Nanog_dome_peak_234	291	.	16.3127	32.254	29.104	178	TRUE	FALSE	TRUE
chr1	8693898	8694218	Nanog_dome_peak_237	618	.	20.4561	65.5704	61.8959	173	TRUE	FALSE	FALSE
chr1	8704565	8704693	Nanog_dome_peak_239	196	.	12.4317	22.5674	19.623	67	TRUE	FALSE	TRUE
chr1	8733033	8733414	Nanog_dome_peak_241	292	.	13.5573	32.3757	29.2235	221	TRUE	FALSE	TRUE
chr1	8737073	8737188	Nanog_dome_peak_242	237	.	11.7921	26.7988	23.7593	55	TRUE	FALSE	FALSE
chr1	8832463	8832668	Nanog_dome_peak_244	206	.	13.0025	23.6603	20.6906	142	TRUE	TRUE	TRUE
chr1	8977900	8978043	Nanog_dome_peak_247	270	.	15.65	30.1571	27.0484	49	TRUE	TRUE	FALSE
chr1	9175848	9176138	Nanog_dome_peak_253	677	.	25.8073	71.5341	67.7799	189	TRUE	FALSE	TRUE
chr1	9182231	9182377	Nanog_dome_peak_254	433	.	20.7633	46.7192	43.3184	70	TRUE	FALSE	TRUE
chr1	9195928	9196051	Nanog_dome_peak_255	245	.	13.9774	27.5583	24.5028	44	TRUE	FALSE	TRUE
chr1	9282740	9283155	Nanog_dome_peak_258	746	.	20.4064	78.4878	74.6427	272	TRUE	FALSE	TRUE
chr1	9294478	9294724	Nanog_dome_peak_261	806	.	15.5932	84.6075	80.6844	175	FALSE	FALSE	TRUE
chr1	9297072	9297572	Nanog_dome_peak_263	463	.	11.8546	49.8103	46.3611	86	TRUE	FALSE	TRUE
chr1	9369160	9369395	Nanog_dome_peak_269	356	.	18.8198	38.9124	35.6408	58	TRUE	TRUE	TRUE
chr1	9379238	9379451	Nanog_dome_peak_270	301	.	16.0329	33.3537	30.1827	52	FALSE	FALSE	TRUE
chr1	9457626	9457991	Nanog_dome_peak_272	432	.	18.5364	46.6165	43.2172	199	FALSE	FALSE	TRUE
chr1	9676258	9676405	Nanog_dome_peak_277	161	.	11.0585	18.9819	16.1294	57	TRUE	TRUE	TRUE
chr1	9719989	9720096	Nanog_dome_peak_279	145	.	10.1621	17.4068	14.598	45	TRUE	TRUE	TRUE
chr1	9795113	9795324	Nanog_dome_peak_282	165	.	11.2067	19.3969	16.5331	55	TRUE	TRUE	TRUE
chr1	9858487	9858599	Nanog_dome_peak_283	176	.	11.6673	20.5187	17.6258	73	FALSE	FALSE	TRUE
chr1	9941034	9941184	Nanog_dome_peak_286	163	.	11.162	19.2109	16.352	70	TRUE	FALSE	TRUE
chr1	10107392	10107841	Nanog_dome_peak_293	1333	.	19.8906	137.932	133.36	257	FALSE	TRUE	FALSE
chr1	10199589	10199748	Nanog_dome_peak_297	175	.	11.2579	20.458	17.5666	52	TRUE	FALSE	TRUE
chr1	10248976	10249204	Nanog_dome_peak_299	346	.	15.9752	37.8613	34.6079	142	FALSE	FALSE	TRUE
chr1	10279968	10280378	Nanog_dome_peak_301	158	.	10.6834	18.6732	15.8286	248	FALSE	TRUE	TRUE
chr1	10450913	10451214	Nanog_dome_peak_306	687	.	24.3146	72.5496	68.7821	208	FALSE	TRUE	TRUE
chr1	10473565	10473786	Nanog_dome_peak_307	322	.	16.8894	35.4365	32.2264	112	TRUE	FALSE	FALSE
chr1	10494838	10495015	Nanog_dome_peak_308	230	.	12.4387	26.0855	23.0619	88	FALSE	FALSE	TRUE
chr1	10495896	10496033	Nanog_dome_peak_309	348	.	16.5313	38.1013	34.8434	65	TRUE	FALSE	FALSE
chr1	10599036	10599397	Nanog_dome_peak_315	275	.	11.8649	30.6867	27.5673	268	TRUE	TRUE	FALSE
chr1	10619998	10620275	Nanog_dome_peak_317	588	.	23.0575	62.4506	58.8193	195	TRUE	FALSE	TRUE
chr1	10664674	10664975	Nanog_dome_peak_320	181	.	11.7774	21.0109	18.1056	183	TRUE	FALSE	TRUE
chr1	10848405	10848767	Nanog_dome_peak_323	218	.	12.971	24.8012	21.8059	156	FALSE	TRUE	FALSE
chr1	10885263	10885417	Nanog_dome_peak_324	212	.	13.122	24.2135	21.2314	105	TRUE	FALSE	TRUE
chr1	10901448	10901669	Nanog_dome_peak_325	187	.	12.1096	21.6401	18.7193	123	TRUE	FALSE	TRUE
chr1	10975243	10975412	Nanog_dome_peak_326	241	.	14.0468	27.1765	24.1291	57	FALSE	FALSE	FALSE
chr1	11075559	11075814	Nanog_dome_peak_328	298	.	16.7246	33.0363	29.8712	143	TRUE	TRUE	TRUE
chr1	11081293	11081519	Nanog_dome_peak_329	225	.	13.8057	25.5328	22.5213	69	TRUE	FALSE	TRUE
chr1	11099908	11100089	Nanog_dome_peak_330	216	.	13.4662	24.5927	21.602	110	TRUE	TRUE	TRUE
chr1	11121425	11121700	Nanog_dome_peak_331	471	.	21.3652	50.6564	47.1947	82	FALSE	FALSE	TRUE
chr1	11496157	11496655	Nanog_dome_peak_336	182	.	10.5181	21.196	18.2861	300	TRUE	FALSE	TRUE
chr1	12100773	12101013	Nanog_dome_peak_350	185	.	12.0417	21.5099	18.5922	119	TRUE	FALSE	TRUE
chr1	12348001	12348361	Nanog_dome_peak_356	573	.	21.2254	60.9821	57.3716	175	FALSE	FALSE	FALSE
chr1	12501084	12501203	Nanog_dome_peak_358	172	.	11.5416	20.0893	17.2072	56	FALSE	FALSE	TRUE
chr1	12564640	12564770	Nanog_dome_peak_360	201	.	12.5357	23.1354	20.1781	71	TRUE	TRUE	TRUE
chr1	12971352	12971575	Nanog_dome_peak_364	258	.	15.0077	28.9278	25.844	73	FALSE	FALSE	FALSE
chr1	13096245	13096456	Nanog_dome_peak_369	323	.	15.8497	35.5879	32.3751	76	TRUE	FALSE	TRUE
chr1	13120902	13121312	Nanog_dome_peak_370	212	.	12.8914	24.1974	21.2156	164	TRUE	TRUE	TRUE
chr1	13302986	13303151	Nanog_dome_peak_378	259	.	12.3527	29.0051	25.9195	86	TRUE	FALSE	TRUE
chr1	13318894	13319411	Nanog_dome_peak_380	281	.	14.0701	31.2817	28.1506	210	TRUE	FALSE	TRUE
chr1	13425568	13425789	Nanog_dome_peak_385	326	.	17.4582	35.8716	32.6538	124	FALSE	TRUE	FALSE
chr1	13533683	13533857	Nanog_dome_peak_386	188	.	12.311	21.8173	18.8919	92	TRUE	TRUE	FALSE
chr1	13552641	13552861	Nanog_dome_peak_387	270	.	15.65	30.1571	27.0484	129	TRUE	TRUE	TRUE
chr1	13603003	13603123	Nanog_dome_peak_389	170	.	11.4764	19.9507	17.0726	81	TRUE	TRUE	FALSE
chr1	13825111	13825849	Nanog_dome_peak_392	224	.	10.3762	25.5021	22.491	362	FALSE	TRUE	FALSE
chr1	13875404	13875815	Nanog_dome_peak_394	197	.	12.0536	22.7347	19.7868	135	TRUE	FALSE	TRUE
chr1	13966830	13967146	Nanog_dome_peak_395	764	.	24.5526	80.2967	76.4289	213	TRUE	TRUE	FALSE
chr1	13989307	13989418	Nanog_dome_peak_396	230	.	14.0912	26.1084	23.0842	46	FALSE	FALSE	TRUE
chr1	14129278	14129454	Nanog_dome_peak_400	168	.	11.2465	19.7092	16.8375	106	TRUE	TRUE	TRUE
chr1	14339637	14339770	Nanog_dome_peak_403	467	.	23.0268	50.1746	46.7198	68	TRUE	FALSE	FALSE
chr1	14355719	14355952	Nanog_dome_peak_405	156	.	10.5996	18.5229	15.6824	88	TRUE	TRUE	TRUE
chr1	14454393	14454698	Nanog_dome_peak_409	206	.	11.6217	23.5791	20.6116	138	TRUE	FALSE	TRUE
chr1	14466191	14466425	Nanog_dome_peak_410	207	.	11.0234	23.7127	20.742	83	TRUE	FALSE	TRUE
chr1	14498160	14498346	Nanog_dome_peak_413	472	.	21.8592	50.7601	47.297	96	TRUE	TRUE	FALSE
chr1	14507383	14507713	Nanog_dome_peak_414	746	.	18.1295	78.5057	74.6603	130	TRUE	FALSE	FALSE
chr1	14509808	14510090	Nanog_dome_peak_415	449	.	12.921	48.3846	44.9571	140	FALSE	FALSE	FALSE
chr1	15230260	15230404	Nanog_dome_peak_418	275	.	15.7032	30.6627	27.5437	57	TRUE	FALSE	TRUE
chr1	15316980	15317182	Nanog_dome_peak_420	180	.	11.2895	20.9575	18.0536	69	TRUE	FALSE	TRUE
chr1	15518050	15518204	Nanog_dome_peak_423	554	.	23.5165	59.0444	55.4603	106	TRUE	TRUE	FALSE
chr1	15565770	15565893	Nanog_dome_peak_426	188	.	12.311	21.8173	18.8919	41	TRUE	FALSE	FALSE
chr1	15681250	15681846	Nanog_dome_peak_431	306	.	11.5101	33.8574	30.6772	167	TRUE	TRUE	TRUE
chr1	15781926	15782159	Nanog_dome_peak_433	184	.	11.9745	21.382	18.4676	99	TRUE	FALSE	TRUE
chr1	15911405	15911529	Nanog_dome_peak_439	709	.	23.0506	74.7917	70.9954	56	FALSE	FALSE	FALSE
chr1	15913702	15913844	Nanog_dome_peak_440	227	.	10.1957	25.7559	22.7393	57	TRUE	FALSE	TRUE
chr1	15919181	15919358	Nanog_dome_peak_442	311	.	12.426	34.3397	31.1499	88	TRUE	TRUE	TRUE
chr1	15921226	15921466	Nanog_dome_peak_443	201	.	10.0039	23.0973	20.1409	59	TRUE	FALSE	FALSE
chr1	15926348	15926500	Nanog_dome_peak_444	245	.	12.9953	27.6108	24.5543	66	TRUE	TRUE	TRUE
chr1	15927167	15927393	Nanog_dome_peak_445	317	.	15.8481	34.9219	31.7215	143	FALSE	FALSE	FALSE
chr1	15957194	15957454	Nanog_dome_peak_447	503	.	20.9404	53.8521	50.3422	134	TRUE	TRUE	TRUE
chr1	15989496	15989946	Nanog_dome_peak_450	526	.	18.5741	56.2179	52.6734	232	FALSE	FALSE	TRUE
chr1	16458564	16459062	Nanog_dome_peak_459	208	.	11.4328	23.8272	20.8539	336	TRUE	FALSE	TRUE
chr1	16507804	16508079	Nanog_dome_peak_460	525	.	23.1752	56.0602	52.5181	91	TRUE	FALSE	FALSE
chr1	16538315	16538572	Nanog_dome_peak_461	212	.	12.3403	24.234	21.2515	155	TRUE	FALSE	TRUE
chr1	16540445	16540620	Nanog_dome_peak_462	254	.	13.8874	28.5141	25.4387	64	TRUE	TRUE	TRUE
chr1	16563741	16564123	Nanog_dome_peak_463	1058	.	20.0299	110.131	105.892	272	FALSE	FALSE	FALSE
chr1	16565191	16565428	Nanog_dome_peak_464	392	.	10.6195	42.604	39.2703	106	TRUE	TRUE	FALSE
chr1	16594306	16594906	Nanog_dome_peak_466	254	.	13.5705	28.5736	25.4968	72	FALSE	TRUE	FALSE
chr1	16635531	16635641	Nanog_dome_peak_469	139	.	10.0027	16.7191	13.9292	57	TRUE	FALSE	TRUE
chr1	16720934	16721350	Nanog_dome_peak_473	1047	.	28.9762	108.958	104.733	271	FALSE	FALSE	FALSE
chr1	16759155	16759433	Nanog_dome_peak_476	771	.	19.5577	80.9783	77.101	168	FALSE	FALSE	TRUE
chr1	16778937	16779193	Nanog_dome_peak_480	244	.	13.2635	27.4648	24.4112	169	FALSE	TRUE	TRUE
chr1	17317006	17317256	Nanog_dome_peak_490	264	.	15.1223	29.589	26.4915	147	TRUE	TRUE	TRUE
chr1	17355455	17355677	Nanog_dome_peak_491	508	.	19.3314	54.3214	50.8047	81	FALSE	TRUE	FALSE
chr1	17377171	17377482	Nanog_dome_peak_496	325	.	14.3211	35.7276	32.5124	134	TRUE	FALSE	FALSE
chr1	17384391	17384641	Nanog_dome_peak_498	369	.	15.7243	40.2932	36.9983	97	TRUE	FALSE	TRUE
chr1	17695287	17695491	Nanog_dome_peak_512	159	.	10.5345	18.7897	15.9421	78	TRUE	FALSE	TRUE
chr1	17857303	17857548	Nanog_dome_peak_513	198	.	12.5696	22.8267	19.8766	91	TRUE	TRUE	FALSE
chr1	17879117	17879466	Nanog_dome_peak_514	394	.	18.4835	42.811	39.4739	271	FALSE	FALSE	FALSE
chr1	17885230	17885347	Nanog_dome_peak_515	184	.	12.1333	21.3969	18.4821	49	TRUE	TRUE	TRUE
chr1	18029652	18029869	Nanog_dome_peak_518	314	.	16.7572	34.6185	31.4235	142	TRUE	TRUE	FALSE
chr1	18061078	18061189	Nanog_dome_peak_520	185	.	12.1207	21.434	18.5182	44	FALSE	FALSE	FALSE
chr1	18122522	18122737	Nanog_dome_peak_521	203	.	11.4819	23.3462	20.384	124	TRUE	TRUE	TRUE
chr1	18341987	18342099	Nanog_dome_peak_526	184	.	10.9193	21.3318	18.4185	68	TRUE	FALSE	TRUE
chr1	18343570	18343854	Nanog_dome_peak_527	290	.	14.5864	32.1489	29.0012	124	TRUE	TRUE	TRUE
chr1	18383529	18383863	Nanog_dome_peak_529	376	.	16.1335	41.0021	37.6951	235	FALSE	FALSE	FALSE
chr1	18424518	18425033	Nanog_dome_peak_531	200	.	11.9109	22.9884	20.0346	105	TRUE	FALSE	TRUE
chr1	18440485	18441080	Nanog_dome_peak_535	177	.	10.8053	20.6296	17.734	88	TRUE	FALSE	TRUE
chr1	18543504	18543777	Nanog_dome_peak_536	225	.	13.6653	25.6057	22.5925	160	FALSE	FALSE	TRUE
chr1	18613056	18613376	Nanog_dome_peak_539	269	.	12.6037	30.0768	26.9697	103	FALSE	FALSE	TRUE
chr1	18642118	18642269	Nanog_dome_peak_544	193	.	10.19	22.2941	19.3568	55	TRUE	FALSE	TRUE
chr1	18710692	18711074	Nanog_dome_peak_545	889	.	24.8133	92.9836	88.955	90	FALSE	FALSE	FALSE
chr1	18750015	18750185	Nanog_dome_peak_546	205	.	12.5051	23.5163	20.5502	89	TRUE	FALSE	TRUE
chr1	18844154	18844399	Nanog_dome_peak_548	414	.	19.6692	44.8294	41.4592	150	TRUE	FALSE	TRUE
chr1	19095136	19095339	Nanog_dome_peak_556	308	.	13.3418	34.0074	30.8242	136	FALSE	FALSE	TRUE
chr1	19169493	19169682	Nanog_dome_peak_560	261	.	15.3641	29.2515	26.1607	102	TRUE	TRUE	TRUE
chr1	19410060	19410308	Nanog_dome_peak_565	309	.	17.0586	34.1187	30.9334	100	FALSE	FALSE	TRUE
chr1	19415321	19415606	Nanog_dome_peak_566	234	.	13.9358	26.5175	23.4843	148	FALSE	FALSE	TRUE
chr1	19649919	19650370	Nanog_dome_peak_572	2447	.	23.672	250.562	244.72	79	FALSE	FALSE	FALSE
chr1	19659050	19659372	Nanog_dome_peak_574	822	.	13.3819	86.1449	82.2019	161	FALSE	FALSE	TRUE
chr1	19659834	19660166	Nanog_dome_peak_575	1607	.	20.8753	165.682	160.795	171	TRUE	TRUE	TRUE
chr1	19671810	19672237	Nanog_dome_peak_578	1387	.	15.2753	143.396	138.758	324	FALSE	TRUE	FALSE
chr1	19697497	19697628	Nanog_dome_peak_585	394	.	19.2834	42.7828	39.4461	87	TRUE	TRUE	TRUE
chr1	19825247	19825336	Nanog_dome_peak_590	241	.	14.6194	27.1531	24.1061	39	TRUE	FALSE	TRUE
chr1	19900298	19900617	Nanog_dome_peak_593	709	.	25.0606	74.7667	70.9707	238	FALSE	FALSE	FALSE
chr1	20361949	20362144	Nanog_dome_peak_601	243	.	14.1922	27.4359	24.3829	96	TRUE	TRUE	TRUE
chr1	20642841	20643172	Nanog_dome_peak_603	317	.	16.6055	34.9435	31.7424	67	TRUE	FALSE	TRUE
chr1	20763933	20764278	Nanog_dome_peak_605	183	.	11.9081	21.2562	18.3449	86	TRUE	TRUE	TRUE
chr1	20812997	20813191	Nanog_dome_peak_606	155	.	10.5171	18.3758	15.5399	98	FALSE	FALSE	TRUE
chr1	20818362	20818716	Nanog_dome_peak_607	1513	.	27.0891	156.135	151.357	256	FALSE	TRUE	FALSE
chr1	20825736	20826235	Nanog_dome_peak_610	385	.	12.4925	41.8873	38.5657	314	FALSE	TRUE	TRUE
chr1	20837857	20838067	Nanog_dome_peak_612	154	.	10.2088	18.2328	15.4006	126	TRUE	FALSE	TRUE
chr1	20928744	20928972	Nanog_dome_peak_614	648	.	26.6439	68.5684	64.8534	69	TRUE	FALSE	FALSE
chr1	20962032	20962247	Nanog_dome_peak_615	190	.	12.1321	22.0136	19.0831	135	TRUE	FALSE	TRUE
chr1	21202719	21202971	Nanog_dome_peak_617	371	.	16.6334	40.4026	37.1057	145	TRUE	FALSE	TRUE
chr1	21209679	21210089	Nanog_dome_peak_620	1097	.	23.6143	114.036	109.751	151	FALSE	FALSE	FALSE
chr1	21221817	21222098	Nanog_dome_peak_622	393	.	17.9533	42.6372	39.303	99	TRUE	FALSE	TRUE
chr1	21263779	21263954	Nanog_dome_peak_626	295	.	16.9277	32.6898	29.5316	93	TRUE	FALSE	TRUE
chr1	21291685	21292040	Nanog_dome_peak_627	1646	.	29.8485	169.593	164.66	169	FALSE	FALSE	FALSE
chr1	21296945	21297383	Nanog_dome_peak_629	1230	.	21.3816	127.507	123.062	243	FALSE	TRUE	FALSE
chr1	21309307	21309503	Nanog_dome_peak_630	143	.	10.2264	17.1514	14.3493	55	TRUE	FALSE	TRUE
chr1	21404924	21405164	Nanog_dome_peak_631	224	.	13.5911	25.4677	22.4574	75	TRUE	FALSE	TRUE
chr1	21501447	21501749	Nanog_dome_peak_634	192	.	11.7153	22.1573	19.2233	219	FALSE	FALSE	TRUE
chr1	21726012	21726284	Nanog_dome_peak_640	334	.	12.6071	36.6956	33.4629	153	TRUE	FALSE	TRUE
chr1	21730014	21730234	Nanog_dome_peak_641	728	.	19.1491	76.631	72.8103	124	TRUE	FALSE	FALSE
chr1	21735916	21736097	Nanog_dome_peak_644	654	.	17.3005	69.1462	65.4235	101	TRUE	FALSE	TRUE
chr1	21786830	21787018	Nanog_dome_peak_650	466	.	20.5637	50.0562	46.6034	99	FALSE	TRUE	TRUE
chr1	22157485	22157738	Nanog_dome_peak_656	205	.	13.0577	23.5168	20.5506	97	TRUE	FALSE	TRUE
chr1	22341327	22341585	Nanog_dome_peak_658	171	.	11.511	20.0233	17.1434	199	FALSE	FALSE	TRUE
chr1	22463439	22463646	Nanog_dome_peak_660	362	.	19.384	39.5304	36.2481	114	FALSE	FALSE	TRUE
chr1	22668116	22668283	Nanog_dome_peak_665	392	.	17.0504	42.5765	39.2432	54	TRUE	FALSE	TRUE
chr1	22672011	22672177	Nanog_dome_peak_666	256	.	12.9394	28.7457	25.6656	17	TRUE	TRUE	TRUE
chr1	22678424	22678628	Nanog_dome_peak_667	221	.	13.6087	25.1448	22.1419	160	TRUE	FALSE	TRUE
chr1	22835857	22836063	Nanog_dome_peak_669	317	.	16.9701	34.9958	31.7938	87	FALSE	FALSE	TRUE
chr1	22851683	22851799	Nanog_dome_peak_670	139	.	10.0027	16.7191	13.9292	46	TRUE	FALSE	TRUE
chr1	22890453	22890552	Nanog_dome_peak_673	155	.	10.7722	18.3893	15.5523	44	TRUE	TRUE	TRUE
chr1	22984310	22984730	Nanog_dome_peak_674	178	.	11.1836	20.7777	17.8779	334	FALSE	FALSE	TRUE
chr1	23014320	23014458	Nanog_dome_peak_676	173	.	11.5018	20.1962	17.3113	52	TRUE	TRUE	TRUE
chr1	23116512	23116688	Nanog_dome_peak_677	189	.	12.2478	21.9076	18.9795	101	TRUE	FALSE	TRUE
chr1	23294344	23294542	Nanog_dome_peak_682	152	.	10.3559	18.0908	15.2627	94	TRUE	FALSE	TRUE
chr1	23337800	23337985	Nanog_dome_peak_685	241	.	14.316	27.2188	24.1706	80	TRUE	TRUE	TRUE
chr1	23350306	23350461	Nanog_dome_peak_686	206	.	13.0805	23.5716	20.6043	66	FALSE	FALSE	TRUE
chr1	23356936	23357078	Nanog_dome_peak_687	724	.	31.8857	76.2541	72.4383	69	FALSE	TRUE	TRUE
chr1	23452331	23452548	Nanog_dome_peak_693	271	.	15.2293	30.2773	27.1662	107	FALSE	FALSE	TRUE
chr1	23489833	23490044	Nanog_dome_peak_695	171	.	11.2525	20.0508	17.1703	81	TRUE	TRUE	FALSE
chr1	23559247	23559485	Nanog_dome_peak_698	262	.	14.9642	29.3023	26.2105	114	TRUE	FALSE	TRUE
chr1	23594467	23594596	Nanog_dome_peak_699	158	.	10.7116	18.724	15.8783	56	TRUE	FALSE	TRUE
chr1	23595898	23595987	Nanog_dome_peak_700	190	.	12.1321	22.0136	19.0831	57	TRUE	FALSE	TRUE
chr1	23975984	23976267	Nanog_dome_peak_707	529	.	18.7394	56.5218	52.9732	118	FALSE	TRUE	TRUE
chr1	23981953	23982230	Nanog_dome_peak_710	290	.	11.009	32.206	29.0572	111	TRUE	FALSE	TRUE
chr1	23998738	23999089	Nanog_dome_peak_712	748	.	23.6917	78.7063	74.8585	227	FALSE	TRUE	FALSE
chr1	24080849	24081040	Nanog_dome_peak_717	222	.	12.6491	25.2953	22.289	108	TRUE	FALSE	TRUE
chr1	24221610	24221824	Nanog_dome_peak_722	477	.	22.1192	51.2103	47.7398	74	FALSE	TRUE	TRUE
chr1	24233333	24233513	Nanog_dome_peak_724	1143	.	24.3737	118.73	114.389	91	FALSE	TRUE	FALSE
chr1	24234377	24234603	Nanog_dome_peak_725	739	.	17.4837	77.7628	73.9272	99	TRUE	FALSE	TRUE
chr1	24239391	24239589	Nanog_dome_peak_727	197	.	10.069	22.6466	19.7005	146	TRUE	FALSE	TRUE
chr1	24467377	24467482	Nanog_dome_peak_733	143	.	10.0285	17.1663	14.3637	36	TRUE	FALSE	TRUE
chr1	24557268	24557482	Nanog_dome_peak_734	236	.	13.4835	26.7081	23.6705	76	TRUE	FALSE	TRUE
chr1	24563874	24564036	Nanog_dome_peak_735	588	.	25.9542	62.4379	58.8066	109	TRUE	TRUE	FALSE
chr1	24852934	24853178	Nanog_dome_peak_743	427	.	19.5947	46.1494	42.7578	110	FALSE	TRUE	TRUE
chr1	24859369	24859518	Nanog_dome_peak_744	396	.	19.7495	42.9412	39.6021	49	FALSE	FALSE	TRUE
chr1	24873273	24873718	Nanog_dome_peak_747	3439	.	28.7398	351.01	343.924	177	FALSE	TRUE	FALSE
chr1	24888888	24889149	Nanog_dome_peak_749	856	.	23.6268	89.6646	85.6774	82	FALSE	FALSE	TRUE
chr1	24901880	24902341	Nanog_dome_peak_751	1506	.	24.7552	155.443	150.673	238	TRUE	FALSE	FALSE
chr1	24907888	24908055	Nanog_dome_peak_752	254	.	14.2467	28.56	25.4835	74	TRUE	FALSE	TRUE
chr1	24922511	24922883	Nanog_dome_peak_755	1427	.	27.2253	147.444	142.76	163	FALSE	FALSE	TRUE
chr1	24933896	24934248	Nanog_dome_peak_756	966	.	11.9347	100.789	96.6656	140	TRUE	TRUE	TRUE
chr1	24938631	24939111	Nanog_dome_peak_757	1911	.	18.0647	196.393	191.154	237	FALSE	TRUE	FALSE
chr1	24946479	24946760	Nanog_dome_peak_758	460	.	19.7759	49.4953	46.0512	155	FALSE	FALSE	TRUE
chr1	25104315	25104480	Nanog_dome_peak_764	195	.	11.595	22.4579	19.5162	70	TRUE	FALSE	TRUE
chr1	25113012	25113336	Nanog_dome_peak_766	410	.	18.9969	44.4028	41.0401	140	TRUE	TRUE	TRUE
chr1	25125011	25125233	Nanog_dome_peak_767	165	.	10.8817	19.393	16.5296	94	FALSE	FALSE	TRUE
chr1	25144272	25144435	Nanog_dome_peak_769	274	.	15.1053	30.5969	27.4793	81	FALSE	FALSE	TRUE
chr1	25370258	25370456	Nanog_dome_peak_775	507	.	23.4677	54.2955	50.7792	86	TRUE	FALSE	TRUE
chr1	25565951	25566076	Nanog_dome_peak_781	241	.	14.6194	27.1531	24.1061	49	TRUE	FALSE	FALSE
chr1	25594947	25595174	Nanog_dome_peak_782	215	.	10.8491	24.5773	21.5871	72	TRUE	FALSE	TRUE
chr1	25687605	25687773	Nanog_dome_peak_785	206	.	12.5679	23.6261	20.6573	64	TRUE	FALSE	FALSE
chr1	25801426	25801697	Nanog_dome_peak_787	986	.	32.8054	102.759	98.611	113	FALSE	FALSE	FALSE
chr1	25978396	25978615	Nanog_dome_peak_788	166	.	11.303	19.5298	16.6631	85	TRUE	TRUE	TRUE
chr1	26063150	26063373	Nanog_dome_peak_792	387	.	15.114	42.1255	38.7999	153	TRUE	FALSE	TRUE
chr1	26071529	26071845	Nanog_dome_peak_794	1051	.	25.3233	109.369	105.139	113	FALSE	FALSE	FALSE
chr1	26079756	26079946	Nanog_dome_peak_796	160	.	11.0244	18.9074	16.0568	47	TRUE	FALSE	TRUE
chr1	26099106	26099292	Nanog_dome_peak_798	155	.	10.7591	18.3416	15.5066	91	TRUE	FALSE	TRUE
chr1	26161765	26161883	Nanog_dome_peak_801	157	.	10.8901	18.6181	15.7751	28	TRUE	FALSE	TRUE
chr1	26248042	26248216	Nanog_dome_peak_805	196	.	12.6502	22.5738	19.6293	84	TRUE	TRUE	TRUE
chr1	26283178	26283440	Nanog_dome_peak_806	386	.	17.5603	41.9728	38.6497	157	TRUE	TRUE	TRUE
chr1	26338364	26338641	Nanog_dome_peak_812	658	.	15.8098	69.5635	65.8353	131	TRUE	FALSE	TRUE
chr1	26340080	26340328	Nanog_dome_peak_813	481	.	12.8358	51.673	48.1957	121	TRUE	FALSE	TRUE
chr1	26348247	26348387	Nanog_dome_peak_815	198	.	11.5115	22.8475	19.897	88	TRUE	TRUE	TRUE
chr1	26348603	26348809	Nanog_dome_peak_816	357	.	17.0528	38.981	35.708	146	TRUE	FALSE	TRUE
chr1	26358020	26358329	Nanog_dome_peak_818	1173	.	26.907	121.687	117.309	88	FALSE	FALSE	FALSE
chr1	26394281	26394665	Nanog_dome_peak_821	392	.	14.9797	42.6102	39.2764	294	TRUE	TRUE	FALSE
chr1	26453352	26453487	Nanog_dome_peak_825	265	.	10.6504	29.628	26.5298	62	TRUE	TRUE	TRUE
chr1	26455379	26455853	Nanog_dome_peak_826	416	.	14.3471	45.0457	41.672	185	FALSE	FALSE	TRUE
chr1	26617365	26617876	Nanog_dome_peak_833	1583	.	20.9269	163.169	158.31	168	FALSE	TRUE	FALSE
chr1	26642674	26643076	Nanog_dome_peak_836	1578	.	22.8415	162.705	157.853	254	FALSE	TRUE	FALSE
chr1	26673342	26673892	Nanog_dome_peak_839	1798	.	19.5579	185.002	179.899	187	FALSE	FALSE	FALSE
chr1	26680141	26680425	Nanog_dome_peak_840	651	.	14.145	68.8941	65.1747	127	FALSE	FALSE	TRUE
chr1	26829412	26829799	Nanog_dome_peak_846	417	.	16.7975	45.1398	41.7646	307	FALSE	FALSE	TRUE
chr1	26840722	26841026	Nanog_dome_peak_848	360	.	16.0291	39.3735	36.0939	74	FALSE	FALSE	FALSE
chr1	26851261	26851475	Nanog_dome_peak_850	962	.	21.4093	100.358	96.2392	118	FALSE	FALSE	FALSE
chr1	26853919	26854187	Nanog_dome_peak_851	657	.	16.4319	69.5237	65.7962	124	TRUE	FALSE	TRUE
chr1	26881865	26882138	Nanog_dome_peak_855	934	.	15.2574	97.509	93.4259	95	TRUE	FALSE	TRUE
chr1	26882374	26882630	Nanog_dome_peak_856	1330	.	19.3058	137.608	133.04	118	FALSE	FALSE	FALSE
chr1	26914028	26914283	Nanog_dome_peak_861	919	.	10.6877	96.0295	91.9638	107	TRUE	FALSE	TRUE
chr1	26915009	26915433	Nanog_dome_peak_862	1655	.	15.6529	170.503	165.56	234	FALSE	TRUE	FALSE
chr1	26922492	26922867	Nanog_dome_peak_864	156	.	10.1032	18.4973	15.6574	136	TRUE	FALSE	TRUE
chr1	26954148	26954386	Nanog_dome_peak_865	1207	.	33.1181	125.137	120.719	153	TRUE	TRUE	TRUE
chr1	27025376	27025592	Nanog_dome_peak_869	146	.	10.0231	17.511	14.6992	83	TRUE	TRUE	TRUE
chr1	27052794	27053005	Nanog_dome_peak_872	254	.	14.8051	28.5508	25.4746	57	TRUE	FALSE	TRUE
chr1	27073813	27074098	Nanog_dome_peak_873	188	.	11.1752	21.7571	18.8333	155	FALSE	FALSE	TRUE
chr1	27115866	27116006	Nanog_dome_peak_876	169	.	11.1358	19.8421	16.9671	54	TRUE	TRUE	TRUE
chr1	27135822	27136283	Nanog_dome_peak_881	664	.	16.0727	70.2249	66.4879	341	FALSE	TRUE	FALSE
chr1	27152041	27152228	Nanog_dome_peak_884	316	.	15.0336	34.888	31.6881	76	FALSE	TRUE	TRUE
chr1	27158877	27159232	Nanog_dome_peak_886	575	.	19.4612	61.168	57.555	184	TRUE	TRUE	TRUE
chr1	27191807	27192226	Nanog_dome_peak_889	593	.	19.1169	63.026	59.3866	249	FALSE	FALSE	TRUE
chr1	27203364	27203805	Nanog_dome_peak_891	330	.	17.0147	36.2655	33.0405	226	TRUE	TRUE	TRUE
chr1	27808771	27808899	Nanog_dome_peak_893	311	.	17.4082	34.383	31.1924	60	FALSE	TRUE	TRUE
chr1	28030674	28030909	Nanog_dome_peak_896	180	.	11.5448	20.9599	18.0557	137	TRUE	FALSE	TRUE
chr1	28364811	28365098	Nanog_dome_peak_900	531	.	19.3015	56.7236	53.1724	210	TRUE	FALSE	FALSE
chr1	28393284	28393480	Nanog_dome_peak_904	203	.	11.4589	23.3079	20.3466	128	TRUE	TRUE	TRUE
chr1	28410702	28411130	Nanog_dome_peak_908	717	.	14.1333	75.5365	71.73	221	TRUE	TRUE	TRUE
chr1	28415855	28416119	Nanog_dome_peak_910	357	.	10.1842	38.9766	35.7037	65	TRUE	FALSE	TRUE
chr1	28582500	28582598	Nanog_dome_peak_913	353	.	15.1927	38.6488	35.3818	56	TRUE	FALSE	TRUE
chr1	28586101	28586230	Nanog_dome_peak_915	526	.	20.8703	56.1788	52.6351	67	TRUE	FALSE	TRUE
chr1	28903762	28903882	Nanog_dome_peak_920	163	.	10.2465	19.2078	16.3491	49	TRUE	FALSE	TRUE
chr1	28904610	28904909	Nanog_dome_peak_921	362	.	17.3818	39.5367	36.2543	210	TRUE	TRUE	FALSE
chr1	29192084	29192266	Nanog_dome_peak_928	162	.	10.9429	19.1447	16.2877	110	TRUE	TRUE	TRUE
chr1	29211280	29211572	Nanog_dome_peak_930	487	.	20.4351	52.1911	48.7059	158	TRUE	FALSE	TRUE
chr1	29216215	29216415	Nanog_dome_peak_931	172	.	10.2176	20.1678	17.2839	100	TRUE	FALSE	TRUE
chr1	29226846	29226968	Nanog_dome_peak_932	264	.	15.6267	29.5871	26.4897	37	TRUE	FALSE	FALSE
chr1	29598130	29598493	Nanog_dome_peak_935	252	.	13.7947	28.3577	25.2858	74	TRUE	FALSE	TRUE
chr1	29609436	29609966	Nanog_dome_peak_936	476	.	18.4204	51.1067	47.6378	121	FALSE	FALSE	TRUE
chr1	29648060	29648324	Nanog_dome_peak_940	386	.	18.7918	41.9357	38.6132	103	FALSE	FALSE	TRUE
chr1	29653359	29653703	Nanog_dome_peak_941	610	.	22.8947	64.7551	61.0916	156	TRUE	FALSE	TRUE
chr1	29664220	29664399	Nanog_dome_peak_942	183	.	11.9081	21.2562	18.3449	109	FALSE	FALSE	TRUE
chr1	29847859	29848038	Nanog_dome_peak_949	303	.	12.7054	33.5306	30.3562	65	TRUE	FALSE	TRUE
chr1	29849990	29850192	Nanog_dome_peak_950	680	.	21.4553	71.8032	68.0457	73	FALSE	FALSE	TRUE
chr1	29855190	29855539	Nanog_dome_peak_951	2263	.	22.0035	232.01	226.375	98	FALSE	FALSE	FALSE
chr1	29865969	29866198	Nanog_dome_peak_955	1285	.	18.0826	133.069	128.558	102	FALSE	FALSE	TRUE
chr1	29871246	29871526	Nanog_dome_peak_957	902	.	14.5812	94.3011	90.2564	171	FALSE	TRUE	TRUE
chr1	29877719	29878045	Nanog_dome_peak_959	1356	.	16.9925	140.289	135.688	170	TRUE	FALSE	FALSE
chr1	29880552	29880942	Nanog_dome_peak_960	1475	.	19.4972	152.3	147.564	254	FALSE	FALSE	FALSE
chr1	29893936	29894472	Nanog_dome_peak_961	2821	.	25.8395	288.51	282.194	221	FALSE	FALSE	FALSE
chr1	29935248	29935533	Nanog_dome_peak_962	725	.	25.4714	76.4027	72.585	111	FALSE	TRUE	TRUE
chr1	30053331	30053481	Nanog_dome_peak_964	173	.	11.5018	20.1962	17.3113	70	TRUE	FALSE	TRUE
chr1	30059225	30059719	Nanog_dome_peak_965	714	.	20.959	75.2368	71.4344	180	FALSE	FALSE	FALSE
chr1	30067410	30067710	Nanog_dome_peak_966	461	.	20.7156	49.5497	46.1048	91	TRUE	TRUE	FALSE
chr1	30075099	30075406	Nanog_dome_peak_967	368	.	18.1131	40.0963	36.8047	154	TRUE	TRUE	FALSE
chr1	30231094	30231184	Nanog_dome_peak_969	295	.	16.9277	32.6898	29.5316	43	TRUE	FALSE	FALSE
chr1	30327846	30328087	Nanog_dome_peak_970	340	.	17.941	37.2989	34.0556	55	FALSE	FALSE	TRUE
chr1	30359155	30359373	Nanog_dome_peak_974	244	.	11.471	27.4672	24.4135	61	TRUE	FALSE	TRUE
chr1	30359897	30360285	Nanog_dome_peak_975	236	.	10.6809	26.6548	23.6183	314	TRUE	TRUE	FALSE
chr1	30493151	30493281	Nanog_dome_peak_977	242	.	14.1191	27.3053	24.2551	64	TRUE	FALSE	TRUE
chr1	30698006	30698170	Nanog_dome_peak_982	139	.	10.0027	16.7191	13.9292	79	TRUE	FALSE	TRUE
chr1	30723245	30723428	Nanog_dome_peak_983	452	.	18.8337	48.6697	45.2382	88	TRUE	FALSE	FALSE
chr1	30723748	30723897	Nanog_dome_peak_984	176	.	10.111	20.5176	17.6249	36	TRUE	FALSE	TRUE
chr1	30757127	30757366	Nanog_dome_peak_986	210	.	13.1917	24.0355	21.0573	89	FALSE	FALSE	FALSE
chr1	30975389	30975613	Nanog_dome_peak_987	255	.	14.5829	28.62	25.5425	95	TRUE	FALSE	TRUE
chr1	31421371	31421641	Nanog_dome_peak_993	708	.	26.0328	74.6316	70.8373	162	TRUE	FALSE	FALSE
chr1	31488606	31488963	Nanog_dome_peak_995	259	.	14.8093	29.0237	25.9378	151	TRUE	FALSE	TRUE
chr1	31531357	31531489	Nanog_dome_peak_997	388	.	16.8344	42.207	38.88	54	FALSE	FALSE	TRUE
chr1	31534001	31534176	Nanog_dome_peak_998	509	.	19.8566	54.4261	50.9078	94	TRUE	TRUE	FALSE
chr1	31544309	31544832	Nanog_dome_peak_999	1101	.	27.7206	114.471	110.18	416	FALSE	TRUE	FALSE
chr1	31552030	31552212	Nanog_dome_peak_1000	341	.	16.1365	37.4356	34.1897	115	TRUE	TRUE	TRUE
chr1	31552352	31552454	Nanog_dome_peak_1001	176	.	10.4621	20.5732	17.6789	45	TRUE	FALSE	TRUE
chr1	31674159	31674416	Nanog_dome_peak_1005	271	.	14.8877	30.2203	27.1103	103	FALSE	FALSE	TRUE
chr1	31725003	31725187	Nanog_dome_peak_1007	358	.	19.1615	39.087	35.8122	73	TRUE	TRUE	FALSE
chr1	31749689	31749807	Nanog_dome_peak_1008	188	.	12.311	21.8173	18.8919	56	TRUE	FALSE	TRUE
chr1	31762621	31762759	Nanog_dome_peak_1009	139	.	10.0027	16.7191	13.9292	103	TRUE	FALSE	FALSE
chr1	31771386	31771655	Nanog_dome_peak_1010	357	.	18.6079	39.0737	35.7992	172	FALSE	FALSE	FALSE
chr1	31987431	31987772	Nanog_dome_peak_1015	522	.	24.3048	55.7822	52.2442	165	TRUE	FALSE	TRUE
chr1	32051500	32051595	Nanog_dome_peak_1016	139	.	10.0027	16.7191	13.9292	31	TRUE	FALSE	TRUE
chr1	32117778	32118054	Nanog_dome_peak_1019	304	.	14.6903	33.6358	30.4598	175	TRUE	TRUE	FALSE
chr1	32531148	32531433	Nanog_dome_peak_1023	275	.	14.8198	30.6811	27.5619	120	TRUE	FALSE	TRUE
chr1	32674395	32674505	Nanog_dome_peak_1027	188	.	11.4737	21.7486	18.8251	51	TRUE	FALSE	TRUE
chr1	32776366	32776632	Nanog_dome_peak_1028	271	.	13.0967	30.2808	27.1696	70	TRUE	FALSE	TRUE
chr1	32777728	32777874	Nanog_dome_peak_1029	180	.	10.068	20.9834	18.0788	108	TRUE	TRUE	TRUE
chr1	33047814	33047996	Nanog_dome_peak_1035	175	.	11.6873	20.3988	17.509	94	TRUE	FALSE	FALSE
chr1	33217719	33218001	Nanog_dome_peak_1040	286	.	16.0492	31.7633	28.6229	121	TRUE	FALSE	TRUE
chr1	33268046	33268576	Nanog_dome_peak_1041	395	.	15.937	42.8691	39.5311	248	FALSE	TRUE	TRUE
chr1	33351082	33351220	Nanog_dome_peak_1042	141	.	10.1333	16.9526	14.1561	78	TRUE	TRUE	TRUE
chr1	33365738	33365896	Nanog_dome_peak_1045	155	.	10.7722	18.3893	15.5523	56	FALSE	FALSE	TRUE
chr1	33409775	33410133	Nanog_dome_peak_1048	406	.	19.1857	44.0035	40.6471	191	FALSE	FALSE	TRUE
chr1	33521276	33521516	Nanog_dome_peak_1050	175	.	11.2579	20.458	17.5666	108	FALSE	FALSE	TRUE
chr1	33558433	33558603	Nanog_dome_peak_1052	503	.	20.4481	53.8201	50.3106	78	TRUE	TRUE	TRUE
chr1	33647430	33647686	Nanog_dome_peak_1053	953	.	30.9036	99.4267	95.3196	143	TRUE	FALSE	FALSE
chr1	33668169	33668282	Nanog_dome_peak_1054	184	.	11.7544	21.3317	18.4184	36	TRUE	FALSE	TRUE
chr1	33693706	33693957	Nanog_dome_peak_1056	172	.	11.2821	20.104	17.2212	135	TRUE	FALSE	TRUE
chr1	34010167	34010451	Nanog_dome_peak_1059	765	.	28.8784	80.4312	76.5614	87	FALSE	FALSE	FALSE
chr1	34042864	34043039	Nanog_dome_peak_1060	280	.	15.966	31.1608	28.0321	91	TRUE	TRUE	TRUE
chr1	34084577	34084803	Nanog_dome_peak_1062	221	.	13.7523	25.1921	22.1885	96	TRUE	TRUE	TRUE
chr1	34111379	34111624	Nanog_dome_peak_1063	189	.	12.2478	21.9076	18.9795	72	FALSE	FALSE	FALSE
chr1	34129981	34130199	Nanog_dome_peak_1064	230	.	14.0912	26.1084	23.0842	88	FALSE	FALSE	TRUE
chr1	34149417	34149656	Nanog_dome_peak_1065	439	.	19.4486	47.401	43.9895	107	FALSE	TRUE	TRUE
chr1	34154886	34155088	Nanog_dome_peak_1067	290	.	15.0188	32.2388	29.0894	110	FALSE	FALSE	TRUE
chr1	34355854	34356275	Nanog_dome_peak_1070	176	.	10.782	20.5909	17.6961	135	FALSE	TRUE	FALSE
chr1	34649535	34649726	Nanog_dome_peak_1080	159	.	10.2867	18.804	15.9559	66	FALSE	TRUE	TRUE
chr1	34731008	34731125	Nanog_dome_peak_1085	139	.	10.0027	16.7191	13.9292	70	TRUE	FALSE	TRUE
chr1	35490073	35490534	Nanog_dome_peak_1090	497	.	15.456	53.278	49.7764	349	FALSE	TRUE	TRUE
chr1	35511428	35511669	Nanog_dome_peak_1094	320	.	17.427	35.2916	32.0844	72	FALSE	FALSE	FALSE
chr1	35630961	35631476	Nanog_dome_peak_1095	661	.	19.1575	69.8462	66.1142	123	FALSE	TRUE	TRUE
chr1	35632454	35632667	Nanog_dome_peak_1097	304	.	11.3894	33.613	30.4374	56	FALSE	FALSE	TRUE
chr1	35638974	35639305	Nanog_dome_peak_1098	229	.	13.6458	25.993	22.9712	138	TRUE	FALSE	FALSE
chr1	35791717	35792135	Nanog_dome_peak_1104	496	.	14.6797	53.1175	49.6185	338	TRUE	TRUE	FALSE
chr1	35972482	35972616	Nanog_dome_peak_1109	165	.	11.2674	19.4486	16.5837	61	FALSE	FALSE	TRUE
chr1	36070434	36070630	Nanog_dome_peak_1110	215	.	13.268	24.4891	21.5008	73	FALSE	FALSE	TRUE
chr1	36408278	36408491	Nanog_dome_peak_1121	171	.	11.511	20.0233	17.1434	102	FALSE	FALSE	TRUE
chr1	36442856	36443394	Nanog_dome_peak_1123	795	.	18.4354	83.4476	79.5389	300	FALSE	FALSE	FALSE
chr1	36451199	36451472	Nanog_dome_peak_1124	358	.	17.5477	39.1322	35.8566	181	FALSE	FALSE	TRUE
chr1	36471657	36471866	Nanog_dome_peak_1125	356	.	18.5116	38.8999	35.6285	109	FALSE	FALSE	TRUE
chr1	36494218	36494351	Nanog_dome_peak_1126	200	.	12.8507	23.0297	20.075	53	FALSE	FALSE	TRUE
chr1	36505260	36505467	Nanog_dome_peak_1128	231	.	12.8358	26.1696	23.1441	147	FALSE	TRUE	TRUE
chr1	36534023	36534426	Nanog_dome_peak_1130	198	.	11.7772	22.7635	19.815	349	TRUE	FALSE	TRUE
chr1	36547653	36547900	Nanog_dome_peak_1131	241	.	14.0468	27.1765	24.1291	92	FALSE	FALSE	TRUE
chr1	36674503	36674736	Nanog_dome_peak_1133	908	.	34.033	94.9327	90.8803	132	FALSE	TRUE	FALSE
chr1	36804985	36805095	Nanog_dome_peak_1136	189	.	12.0354	21.8374	18.9112	66	TRUE	FALSE	TRUE
chr1	36999851	36999991	Nanog_dome_peak_1144	182	.	11.8424	21.1326	18.2244	62	TRUE	TRUE	TRUE
chr1	37014622	37014769	Nanog_dome_peak_1146	145	.	10.2947	17.4027	14.5941	55	TRUE	FALSE	TRUE
chr1	37048940	37049302	Nanog_dome_peak_1147	205	.	12.2445	23.5527	20.586	58	FALSE	FALSE	TRUE
chr1	37054557	37054842	Nanog_dome_peak_1149	172	.	10.1779	20.102	17.2194	195	FALSE	FALSE	TRUE
chr1	37063403	37063631	Nanog_dome_peak_1151	397	.	19.8492	43.1179	39.776	129	FALSE	TRUE	TRUE
chr1	37112218	37112414	Nanog_dome_peak_1153	268	.	15.3247	29.9593	26.8546	146	TRUE	FALSE	TRUE
chr1	37195763	37195931	Nanog_dome_peak_1155	276	.	15.9689	30.7896	27.6684	120	FALSE	FALSE	TRUE
chr1	37262370	37262722	Nanog_dome_peak_1156	356	.	17.8102	38.9137	35.642	120	FALSE	FALSE	TRUE
chr1	37543008	37543156	Nanog_dome_peak_1161	221	.	13.7107	25.1037	22.102	86	TRUE	FALSE	FALSE
chr1	37561820	37562013	Nanog_dome_peak_1162	155	.	10.7722	18.3893	15.5523	107	FALSE	TRUE	FALSE
chr1	37759740	37759957	Nanog_dome_peak_1165	310	.	13.4463	34.1927	31.006	164	TRUE	FALSE	TRUE
chr1	37760997	37761351	Nanog_dome_peak_1166	321	.	13.7124	35.3461	32.1378	73	TRUE	TRUE	TRUE
chr1	37868509	37868697	Nanog_dome_peak_1172	498	.	16.6277	53.3285	49.8262	109	FALSE	FALSE	FALSE
chr1	37869428	37869657	Nanog_dome_peak_1173	1028	.	27.4997	107.058	102.856	126	TRUE	TRUE	FALSE
chr1	37877155	37877281	Nanog_dome_peak_1174	200	.	12.7955	23.0057	20.0518	60	TRUE	FALSE	TRUE
chr1	37896058	37896406	Nanog_dome_peak_1175	448	.	17.2897	48.3146	44.8885	192	TRUE	TRUE	FALSE
chr1	37907355	37907693	Nanog_dome_peak_1179	457	.	14.5927	49.2165	45.7767	184	TRUE	TRUE	TRUE
chr1	37940409	37940645	Nanog_dome_peak_1180	147	.	10.4178	17.5705	14.757	55	TRUE	FALSE	TRUE
chr1	38142556	38142774	Nanog_dome_peak_1181	386	.	17.5603	41.9728	38.6497	103	FALSE	FALSE	TRUE
chr1	38143170	38143351	Nanog_dome_peak_1182	228	.	12.3151	25.8792	22.8598	32	TRUE	FALSE	TRUE
chr1	38171601	38171869	Nanog_dome_peak_1184	544	.	11.076	58.0035	54.4339	153	TRUE	FALSE	TRUE
chr1	38173694	38173940	Nanog_dome_peak_1186	1735	.	24.7129	178.617	173.585	132	FALSE	TRUE	FALSE
chr1	38182662	38182884	Nanog_dome_peak_1190	391	.	13.7784	42.473	39.1413	109	TRUE	FALSE	FALSE
chr1	38187131	38187274	Nanog_dome_peak_1192	358	.	12.4591	39.1	35.825	64	TRUE	FALSE	TRUE
chr1	38224082	38224312	Nanog_dome_peak_1199	1104	.	26.4247	114.695	110.401	106	FALSE	FALSE	TRUE
chr1	38224648	38224955	Nanog_dome_peak_1200	518	.	15.73	55.3883	51.8558	204	TRUE	FALSE	TRUE
chr1	38264977	38265117	Nanog_dome_peak_1201	164	.	11.1413	19.2653	16.4051	84	TRUE	FALSE	TRUE
chr1	38277576	38277824	Nanog_dome_peak_1203	214	.	13.0255	24.4369	21.4497	81	TRUE	TRUE	TRUE
chr1	38340470	38340659	Nanog_dome_peak_1209	267	.	13.9554	29.8285	26.7261	69	TRUE	FALSE	TRUE
chr1	38361153	38361281	Nanog_dome_peak_1212	281	.	14.8228	31.2878	28.1565	39	TRUE	FALSE	FALSE
chr1	38361384	38361684	Nanog_dome_peak_1213	169	.	10.6113	19.815	16.9407	88	FALSE	FALSE	TRUE
chr1	38379140	38379619	Nanog_dome_peak_1214	485	.	19.8555	52.0004	48.518	119	FALSE	FALSE	FALSE
chr1	38550567	38551056	Nanog_dome_peak_1222	1611	.	26.3342	166.014	161.124	184	FALSE	FALSE	FALSE
chr1	38566205	38566734	Nanog_dome_peak_1223	260	.	13.5587	29.1636	26.0746	217	FALSE	FALSE	TRUE
chr1	38699053	38699272	Nanog_dome_peak_1227	292	.	13.5573	32.3757	29.2235	110	TRUE	FALSE	TRUE
chr1	38708487	38709099	Nanog_dome_peak_1229	1435	.	22.1387	148.232	143.539	362	FALSE	TRUE	FALSE
chr1	38758308	38758523	Nanog_dome_peak_1231	401	.	18.4411	43.4618	40.1142	74	TRUE	FALSE	FALSE
chr1	38808656	38808901	Nanog_dome_peak_1233	209	.	12.4775	23.9498	20.9737	93	TRUE	FALSE	TRUE
chr1	38815438	38815691	Nanog_dome_peak_1234	654	.	19.6381	69.1234	65.4009	165	TRUE	FALSE	FALSE
chr1	38816666	38816876	Nanog_dome_peak_1235	574	.	18.1242	61.0845	57.4727	131	FALSE	FALSE	FALSE
chr1	38860133	38860297	Nanog_dome_peak_1237	155	.	10.7722	18.3893	15.5523	85	TRUE	FALSE	TRUE
chr1	38870989	38871365	Nanog_dome_peak_1238	202	.	12.3205	23.195	20.2362	154	TRUE	FALSE	TRUE
chr1	38884049	38884187	Nanog_dome_peak_1239	222	.	13.7942	25.2816	22.2757	83	TRUE	TRUE	TRUE
chr1	38889420	38889657	Nanog_dome_peak_1240	378	.	18.7162	41.1336	37.8245	147	FALSE	FALSE	TRUE
chr1	38907936	38908264	Nanog_dome_peak_1242	757	.	23.6939	79.6269	75.7677	184	FALSE	FALSE	TRUE
chr1	38975881	38975995	Nanog_dome_peak_1248	166	.	10.4486	19.5436	16.6761	49	TRUE	FALSE	TRUE
chr1	38977983	38978132	Nanog_dome_peak_1249	189	.	11.5798	21.9278	18.9992	71	TRUE	FALSE	FALSE
chr1	39104355	39104577	Nanog_dome_peak_1253	389	.	19.3608	42.2561	38.928	90	TRUE	TRUE	TRUE
chr1	39122069	39122389	Nanog_dome_peak_1254	416	.	19.7598	44.9845	41.6118	116	TRUE	FALSE	TRUE
chr1	39127354	39127535	Nanog_dome_peak_1255	170	.	11.1647	19.8937	17.0173	89	FALSE	TRUE	TRUE
chr1	39137809	39138052	Nanog_dome_peak_1257	357	.	17.8937	39.0573	35.783	180	TRUE	FALSE	TRUE
chr1	39151499	39151811	Nanog_dome_peak_1259	212	.	12.3403	24.234	21.2515	68	FALSE	FALSE	TRUE
chr1	39184709	39185056	Nanog_dome_peak_1261	928	.	28.4214	96.9534	92.877	146	FALSE	FALSE	FALSE
chr1	39217055	39217247	Nanog_dome_peak_1267	390	.	17.8084	42.3922	39.062	78	TRUE	TRUE	TRUE
chr1	39314755	39315168	Nanog_dome_peak_1273	378	.	15.4104	41.1979	37.8876	242	TRUE	FALSE	TRUE
chr1	39433343	39433708	Nanog_dome_peak_1284	1109	.	16.0222	115.284	110.985	157	TRUE	FALSE	FALSE
chr1	39465484	39465619	Nanog_dome_peak_1286	187	.	12.2501	21.6716	18.7501	73	TRUE	FALSE	TRUE
chr1	39483506	39483855	Nanog_dome_peak_1287	335	.	16.177	36.8156	33.5808	151	TRUE	FALSE	TRUE
chr1	39512896	39513207	Nanog_dome_peak_1289	227	.	11.2183	25.8101	22.7922	212	TRUE	FALSE	TRUE
chr1	39557170	39557375	Nanog_dome_peak_1296	192	.	10.7892	22.1922	19.2573	152	TRUE	TRUE	TRUE
chr1	39571540	39572261	Nanog_dome_peak_1298	855	.	16.9786	89.5131	85.5277	495	TRUE	FALSE	TRUE
chr1	39612922	39613110	Nanog_dome_peak_1303	197	.	12.3092	22.7296	19.7817	87	TRUE	FALSE	TRUE
chr1	39622455	39623039	Nanog_dome_peak_1304	1382	.	25.8678	142.918	138.286	141	TRUE	TRUE	TRUE
chr1	39628098	39628911	Nanog_dome_peak_1306	1171	.	17.0209	121.546	117.17	459	FALSE	FALSE	TRUE
chr1	39761135	39761476	Nanog_dome_peak_1312	271	.	11.2892	30.2466	27.136	90	FALSE	FALSE	TRUE
chr1	39770349	39770596	Nanog_dome_peak_1315	252	.	12.7018	28.3448	25.2732	190	TRUE	FALSE	TRUE
chr1	39863708	39863891	Nanog_dome_peak_1319	813	.	23.2816	85.2698	81.338	65	FALSE	FALSE	FALSE
chr1	39865547	39865754	Nanog_dome_peak_1320	363	.	14.1574	39.6449	36.3607	96	TRUE	FALSE	FALSE
chr1	39872633	39873139	Nanog_dome_peak_1321	1220	.	26.4063	126.488	122.055	204	TRUE	TRUE	FALSE
chr1	39888410	39888875	Nanog_dome_peak_1322	443	.	17.4077	47.7489	44.3317	182	FALSE	FALSE	FALSE
chr1	39904974	39905128	Nanog_dome_peak_1324	217	.	13.5467	24.7594	21.765	68	TRUE	TRUE	TRUE
chr1	39914967	39915083	Nanog_dome_peak_1325	155	.	10.7722	18.3893	15.5523	34	TRUE	FALSE	TRUE
chr1	39930095	39930359	Nanog_dome_peak_1327	428	.	18.328	46.2612	42.8678	161	TRUE	FALSE	FALSE
chr1	39983632	39983926	Nanog_dome_peak_1328	262	.	13.6697	29.3496	26.2568	166	TRUE	FALSE	TRUE
chr1	39985908	39986130	Nanog_dome_peak_1329	208	.	11.7893	23.8581	20.884	155	TRUE	TRUE	TRUE
chr1	40017950	40018169	Nanog_dome_peak_1331	175	.	10.9777	20.4295	17.5391	53	TRUE	FALSE	TRUE
chr1	40044457	40044666	Nanog_dome_peak_1333	298	.	16.4695	33.0243	29.8596	100	FALSE	FALSE	TRUE
chr1	40107693	40107927	Nanog_dome_peak_1336	276	.	14.8884	30.7979	27.6764	141	FALSE	TRUE	TRUE
chr1	40120536	40120813	Nanog_dome_peak_1337	495	.	21.8463	53.0099	49.5126	72	FALSE	FALSE	FALSE
chr1	40131683	40131892	Nanog_dome_peak_1338	695	.	22.2563	73.3153	69.538	106	TRUE	TRUE	FALSE
chr1	40132794	40132977	Nanog_dome_peak_1339	437	.	16.2328	47.1668	43.7585	80	FALSE	FALSE	TRUE
chr1	40227396	40227516	Nanog_dome_peak_1340	238	.	14.1615	26.9318	23.8894	42	TRUE	FALSE	FALSE
chr1	40263627	40263836	Nanog_dome_peak_1342	150	.	10.2253	17.862	15.0406	183	TRUE	FALSE	TRUE
chr1	40481341	40481658	Nanog_dome_peak_1352	1384	.	31.5104	143.052	138.418	225	FALSE	FALSE	FALSE
chr1	40518019	40518338	Nanog_dome_peak_1354	1113	.	29.2902	115.642	111.337	140	TRUE	TRUE	FALSE
chr1	40821604	40821834	Nanog_dome_peak_1363	207	.	13.1482	23.7514	20.7798	133	TRUE	FALSE	TRUE
chr1	40854419	40854953	Nanog_dome_peak_1365	393	.	17.546	42.6808	39.3458	316	TRUE	FALSE	TRUE
chr1	40888056	40888417	Nanog_dome_peak_1369	233	.	12.6416	26.4244	23.3933	268	TRUE	FALSE	TRUE
chr1	40898408	40898699	Nanog_dome_peak_1371	682	.	18.5931	72.0234	68.2629	94	TRUE	FALSE	TRUE
chr1	40901333	40901530	Nanog_dome_peak_1372	481	.	15.753	51.5956	48.1194	73	FALSE	FALSE	TRUE
chr1	40907148	40907354	Nanog_dome_peak_1374	372	.	15.4735	40.5811	37.2811	153	TRUE	TRUE	TRUE
chr1	40912780	40913202	Nanog_dome_peak_1375	1116	.	15.0426	115.989	111.68	299	FALSE	TRUE	FALSE
chr1	40913728	40914035	Nanog_dome_peak_1376	925	.	13.2935	96.6185	92.5461	111	TRUE	TRUE	TRUE
chr1	40930524	40930710	Nanog_dome_peak_1378	277	.	15.7898	30.826	27.7039	110	TRUE	FALSE	TRUE
chr1	40993973	40994110	Nanog_dome_peak_1380	144	.	10.2894	17.2877	14.4821	65	TRUE	TRUE	TRUE
chr1	41099905	41100023	Nanog_dome_peak_1382	257	.	11.8779	28.8071	25.7258	52	TRUE	FALSE	FALSE
chr1	41100323	41100632	Nanog_dome_peak_1383	321	.	13.7338	35.3841	32.175	182	TRUE	TRUE	TRUE
chr1	41111350	41111619	Nanog_dome_peak_1384	371	.	12.4493	40.4344	37.1368	112	TRUE	FALSE	TRUE
chr1	41112236	41112796	Nanog_dome_peak_1385	394	.	12.8979	42.7632	39.4269	453	TRUE	TRUE	TRUE
chr1	41194002	41194153	Nanog_dome_peak_1388	152	.	10.6505	18.1012	15.2729	84	FALSE	FALSE	TRUE
chr1	41206299	41206541	Nanog_dome_peak_1390	249	.	13.5831	28.0014	24.9366	107	TRUE	FALSE	TRUE
chr1	41238421	41238890	Nanog_dome_peak_1392	748	.	19.3264	78.7366	74.8886	298	TRUE	FALSE	TRUE
chr1	41239641	41239835	Nanog_dome_peak_1393	393	.	12.5452	42.6855	39.3503	105	TRUE	TRUE	TRUE
chr1	41269450	41269802	Nanog_dome_peak_1396	398	.	16.959	43.1631	39.8205	132	FALSE	FALSE	TRUE
chr1	41289808	41290003	Nanog_dome_peak_1397	370	.	19.3111	40.3624	37.066	79	FALSE	FALSE	TRUE
chr1	41478878	41479117	Nanog_dome_peak_1402	168	.	11.2465	19.7092	16.8375	173	TRUE	FALSE	TRUE
chr1	41629442	41629624	Nanog_dome_peak_1409	148	.	10.4449	17.7001	14.8831	68	TRUE	FALSE	TRUE
chr1	41795553	41795789	Nanog_dome_peak_1419	154	.	10.2088	18.2328	15.4006	83	TRUE	FALSE	TRUE
chr1	41807431	41807664	Nanog_dome_peak_1420	561	.	22.9637	59.7563	56.1625	77	TRUE	FALSE	TRUE
chr1	41813513	41813675	Nanog_dome_peak_1421	205	.	12.2445	23.5527	20.586	99	TRUE	TRUE	TRUE
chr1	41827137	41827557	Nanog_dome_peak_1424	635	.	21.8318	67.2352	63.5383	170	TRUE	FALSE	FALSE
chr1	41852401	41852695	Nanog_dome_peak_1426	336	.	17.0154	36.9016	33.6652	143	TRUE	FALSE	FALSE
chr1	41927045	41927174	Nanog_dome_peak_1427	294	.	16.7119	32.6244	29.4675	49	TRUE	FALSE	TRUE
chr1	41940712	41940838	Nanog_dome_peak_1429	195	.	12.5339	22.4731	19.5309	62	TRUE	FALSE	TRUE
chr1	42011833	42012246	Nanog_dome_peak_1432	437	.	17.5328	47.1957	43.787	52	FALSE	FALSE	TRUE
chr1	42093495	42093916	Nanog_dome_peak_1433	338	.	15.9461	37.1144	33.8743	58	FALSE	FALSE	TRUE
chr1	42210718	42210911	Nanog_dome_peak_1434	516	.	20.7764	55.1966	51.667	89	FALSE	TRUE	TRUE
chr1	42214592	42214847	Nanog_dome_peak_1435	314	.	14.4925	34.6497	31.4542	137	TRUE	TRUE	TRUE
chr1	42224906	42225101	Nanog_dome_peak_1436	154	.	10.644	18.2984	15.4646	82	TRUE	FALSE	TRUE
chr1	42232581	42232856	Nanog_dome_peak_1437	346	.	16.7985	37.8637	34.6103	121	FALSE	FALSE	TRUE
chr1	42531007	42531388	Nanog_dome_peak_1441	1097	.	21.1111	114.043	109.758	202	FALSE	TRUE	FALSE
chr1	42531563	42531798	Nanog_dome_peak_1442	374	.	10.1557	40.73	37.4274	165	TRUE	FALSE	TRUE
chr1	42536035	42536276	Nanog_dome_peak_1443	516	.	13.6756	55.1863	51.6567	143	TRUE	TRUE	TRUE
chr1	42602356	42602553	Nanog_dome_peak_1445	366	.	17.1928	39.9176	36.6289	65	FALSE	FALSE	TRUE
chr1	42695175	42695439	Nanog_dome_peak_1448	201	.	12.5357	23.1354	20.1781	161	FALSE	FALSE	TRUE
chr1	42706452	42706700	Nanog_dome_peak_1450	185	.	11.011	21.4841	18.5672	203	TRUE	FALSE	TRUE
chr1	42786545	42786749	Nanog_dome_peak_1457	148	.	10.4449	17.7001	14.8831	63	TRUE	FALSE	TRUE
chr1	43166930	43167129	Nanog_dome_peak_1462	169	.	11.3093	19.8278	16.9531	89	FALSE	FALSE	TRUE
chr1	43298212	43298575	Nanog_dome_peak_1464	359	.	17.6263	39.2658	35.988	199	TRUE	TRUE	FALSE
chr1	43636595	43636892	Nanog_dome_peak_1467	200	.	10.6084	23.0094	20.0553	230	TRUE	FALSE	TRUE
chr1	43659078	43659323	Nanog_dome_peak_1469	463	.	21.7069	49.7706	46.322	133	FALSE	FALSE	TRUE
chr1	43712988	43713193	Nanog_dome_peak_1472	316	.	17.1943	34.8612	31.6619	138	TRUE	FALSE	TRUE
chr1	43720043	43720451	Nanog_dome_peak_1473	165	.	10.0668	19.4051	16.5412	68	TRUE	TRUE	TRUE
chr1	43734731	43735022	Nanog_dome_peak_1475	284	.	15.0229	31.6264	28.4887	193	TRUE	TRUE	TRUE
chr1	43802344	43802568	Nanog_dome_peak_1476	461	.	19.3672	49.5817	46.1362	104	TRUE	TRUE	TRUE
chr1	43829698	43829819	Nanog_dome_peak_1477	192	.	12.4559	22.1454	19.2116	41	TRUE	TRUE	TRUE
chr1	43835968	43836083	Nanog_dome_peak_1478	316	.	17.614	34.8018	31.6036	53	TRUE	TRUE	FALSE
chr1	43880614	43880914	Nanog_dome_peak_1481	176	.	10.7589	20.5524	17.6587	86	FALSE	FALSE	TRUE
chr1	43971142	43971363	Nanog_dome_peak_1483	308	.	17.0118	34.0305	30.8469	66	TRUE	TRUE	TRUE
chr1	44012888	44013181	Nanog_dome_peak_1485	2717	.	44.2456	277.979	271.792	152	TRUE	TRUE	FALSE
chr1	44024995	44025117	Nanog_dome_peak_1486	193	.	12.4612	22.3276	19.3892	66	TRUE	FALSE	TRUE
chr1	44050976	44051304	Nanog_dome_peak_1488	490	.	11.4144	52.5514	49.0609	201	FALSE	TRUE	FALSE
chr1	44523399	44523551	Nanog_dome_peak_1499	345	.	18.5236	37.849	34.5958	47	TRUE	FALSE	FALSE
chr1	44581933	44582102	Nanog_dome_peak_1500	519	.	23.7045	55.4464	51.9132	105	TRUE	FALSE	FALSE
chr1	44704092	44704529	Nanog_dome_peak_1503	574	.	19.8295	61.0115	57.4005	96	TRUE	FALSE	FALSE
chr1	44724142	44724317	Nanog_dome_peak_1505	206	.	13.0025	23.6603	20.6906	95	TRUE	TRUE	TRUE
chr1	44743628	44743878	Nanog_dome_peak_1507	243	.	12.8912	27.4367	24.3837	110	FALSE	FALSE	TRUE
chr1	44800206	44800323	Nanog_dome_peak_1510	145	.	10.2947	17.4027	14.5941	56	TRUE	TRUE	TRUE
chr1	44838581	44838779	Nanog_dome_peak_1512	479	.	15.3141	51.4637	47.9895	64	TRUE	FALSE	FALSE
chr1	44839053	44839337	Nanog_dome_peak_1513	1098	.	27.0972	114.161	109.874	118	TRUE	FALSE	FALSE
chr1	44906422	44906592	Nanog_dome_peak_1514	304	.	15.8446	33.6376	30.4614	78	FALSE	FALSE	TRUE
chr1	45215254	45215442	Nanog_dome_peak_1521	351	.	16.736	38.4465	35.1828	73	TRUE	FALSE	TRUE
chr1	45217225	45217357	Nanog_dome_peak_1522	224	.	12.4083	25.4549	22.4449	67	TRUE	FALSE	TRUE
chr1	45322933	45323112	Nanog_dome_peak_1524	189	.	12.0675	21.8957	18.9682	94	TRUE	FALSE	TRUE
chr1	45341763	45341891	Nanog_dome_peak_1526	285	.	16.3986	31.669	28.5307	36	TRUE	TRUE	TRUE
chr1	45614366	45614647	Nanog_dome_peak_1534	185	.	10.6612	21.434	18.5182	149	TRUE	FALSE	TRUE
chr1	45671652	45671785	Nanog_dome_peak_1539	142	.	10.1951	17.0843	14.2842	85	TRUE	FALSE	TRUE
chr1	45708182	45708530	Nanog_dome_peak_1543	1011	.	15.4946	105.381	101.199	182	TRUE	TRUE	FALSE
chr1	45716197	45716724	Nanog_dome_peak_1546	1813	.	27.1272	186.472	181.354	265	FALSE	FALSE	FALSE
chr1	45726401	45726684	Nanog_dome_peak_1547	493	.	14.2165	52.8203	49.3257	148	FALSE	FALSE	TRUE
chr1	45733752	45733953	Nanog_dome_peak_1550	436	.	12.9472	47.0476	43.6412	98	TRUE	TRUE	TRUE
chr1	45742549	45742840	Nanog_dome_peak_1554	431	.	16.7554	46.5886	43.1897	139	TRUE	FALSE	TRUE
chr1	45852848	45853209	Nanog_dome_peak_1557	221	.	12.8611	25.116	22.1138	135	TRUE	FALSE	FALSE
chr1	45920627	45920767	Nanog_dome_peak_1561	520	.	17.3615	55.5456	52.0108	59	TRUE	FALSE	FALSE
chr1	46114960	46115389	Nanog_dome_peak_1569	779	.	22.9523	81.8696	77.9812	238	FALSE	TRUE	FALSE
chr1	46145552	46145776	Nanog_dome_peak_1570	164	.	11.0323	19.3093	16.4481	65	TRUE	TRUE	TRUE
chr1	46159008	46159267	Nanog_dome_peak_1571	221	.	13.6087	25.1448	22.1419	114	TRUE	FALSE	TRUE
chr1	46223378	46223725	Nanog_dome_peak_1574	171	.	10.985	19.9869	17.108	177	TRUE	TRUE	FALSE
chr1	46247814	46248055	Nanog_dome_peak_1576	661	.	23.8281	69.9016	66.1687	160	FALSE	FALSE	TRUE
chr1	46389619	46389914	Nanog_dome_peak_1580	1246	.	34.6501	129.08	124.617	142	FALSE	TRUE	FALSE
chr1	46650033	46650239	Nanog_dome_peak_1590	433	.	21.1589	46.7416	43.3403	85	TRUE	FALSE	TRUE
chr1	46707734	46707902	Nanog_dome_peak_1593	188	.	11.5001	21.7931	18.8684	76	TRUE	TRUE	TRUE
chr1	46740429	46740741	Nanog_dome_peak_1597	540	.	13.2227	57.6163	54.0517	239	TRUE	TRUE	TRUE
chr1	46742839	46743080	Nanog_dome_peak_1599	398	.	11.0741	43.1649	39.8223	147	FALSE	FALSE	TRUE
chr1	46753736	46753874	Nanog_dome_peak_1600	175	.	11.4629	20.4311	17.5404	63	TRUE	FALSE	TRUE
chr1	46788136	46788254	Nanog_dome_peak_1601	211	.	13.2303	24.1128	21.1327	33	TRUE	FALSE	TRUE
chr1	46806007	46806167	Nanog_dome_peak_1605	282	.	14.5145	31.3905	28.2574	42	TRUE	TRUE	TRUE
chr1	46813218	46813382	Nanog_dome_peak_1606	307	.	16.6604	33.8907	30.7098	81	FALSE	FALSE	TRUE
chr1	46832594	46832982	Nanog_dome_peak_1610	1454	.	20.3239	150.132	145.419	227	FALSE	FALSE	FALSE
chr1	46874780	46875058	Nanog_dome_peak_1617	160	.	10.0522	18.8857	16.0356	107	TRUE	FALSE	TRUE
chr1	46875443	46875571	Nanog_dome_peak_1618	272	.	14.2533	30.3284	27.2163	48	FALSE	FALSE	TRUE
chr1	46924102	46924214	Nanog_dome_peak_1619	169	.	11.4078	19.8078	16.9338	48	TRUE	FALSE	FALSE
chr1	46984024	46984231	Nanog_dome_peak_1624	257	.	14.0765	28.8341	25.7522	70	TRUE	FALSE	TRUE
chr1	47150873	47151204	Nanog_dome_peak_1627	229	.	13.053	25.9761	22.9548	252	TRUE	FALSE	TRUE
chr1	47176481	47176867	Nanog_dome_peak_1629	945	.	10.8145	98.6693	94.5719	277	FALSE	TRUE	FALSE
chr1	47177095	47177493	Nanog_dome_peak_1630	1234	.	11.6159	127.875	123.426	136	FALSE	TRUE	FALSE
chr1	47195807	47196048	Nanog_dome_peak_1633	477	.	19.3892	51.1999	47.7298	115	TRUE	FALSE	FALSE
chr1	47206198	47206647	Nanog_dome_peak_1634	443	.	18.7399	47.7325	44.3156	83	FALSE	FALSE	TRUE
chr1	47221536	47221951	Nanog_dome_peak_1635	743	.	20.2447	78.1449	74.3043	308	TRUE	FALSE	TRUE
chr1	47228177	47228417	Nanog_dome_peak_1636	163	.	10.2686	19.2444	16.385	170	TRUE	FALSE	TRUE
chr1	47330830	47331161	Nanog_dome_peak_1638	228	.	12.9937	25.8759	22.8565	231	FALSE	FALSE	TRUE
chr1	47411906	47412042	Nanog_dome_peak_1639	164	.	11.1413	19.2653	16.4051	51	TRUE	FALSE	TRUE
chr1	47539198	47539361	Nanog_dome_peak_1642	174	.	11.5674	20.3234	17.4354	96	FALSE	FALSE	FALSE
chr1	47549791	47550103	Nanog_dome_peak_1644	201	.	12.5028	23.0762	20.1206	168	TRUE	FALSE	TRUE
chr1	47703876	47704020	Nanog_dome_peak_1645	139	.	10.0027	16.7191	13.9292	54	TRUE	TRUE	TRUE
chr1	47721513	47721677	Nanog_dome_peak_1646	224	.	13.8787	25.4636	22.4535	82	TRUE	FALSE	TRUE
chr1	48692773	48692993	Nanog_dome_peak_1664	144	.	10.2065	17.231	14.4268	92	TRUE	TRUE	TRUE
chr1	48898612	48898850	Nanog_dome_peak_1665	240	.	13.9753	27.0494	24.0048	60	FALSE	FALSE	FALSE
chr1	48939870	48940208	Nanog_dome_peak_1668	406	.	19.5712	43.9621	40.6064	212	TRUE	FALSE	FALSE
chr1	49266796	49266946	Nanog_dome_peak_1671	258	.	11.971	28.9714	25.8867	49	FALSE	FALSE	TRUE
chr1	49270382	49270604	Nanog_dome_peak_1673	295	.	12.9914	32.7163	29.5574	148	TRUE	FALSE	TRUE
chr1	49290543	49290666	Nanog_dome_peak_1675	214	.	11.0924	24.4093	21.423	54	TRUE	FALSE	TRUE
chr1	49303124	49303351	Nanog_dome_peak_1679	357	.	14.9894	39.0074	35.7339	93	TRUE	TRUE	FALSE
chr1	49305318	49305559	Nanog_dome_peak_1680	559	.	20.4361	59.586	55.9946	136	FALSE	TRUE	TRUE
chr1	49314924	49315267	Nanog_dome_peak_1681	700	.	22.5149	73.7984	70.015	196	FALSE	FALSE	TRUE
chr1	49332115	49332413	Nanog_dome_peak_1683	195	.	11.595	22.4579	19.5162	63	TRUE	FALSE	TRUE
chr1	49339562	49339956	Nanog_dome_peak_1684	1130	.	26.2854	117.339	113.014	115	FALSE	FALSE	TRUE
chr1	49352536	49352959	Nanog_dome_peak_1686	2405	.	26.9336	246.36	240.569	184	TRUE	TRUE	FALSE
chr1	49382728	49383064	Nanog_dome_peak_1687	315	.	14.9479	34.7432	31.546	69	TRUE	FALSE	TRUE
chr1	49396505	49396827	Nanog_dome_peak_1688	421	.	18.8089	45.563	42.1807	146	TRUE	FALSE	TRUE
chr1	49434816	49435064	Nanog_dome_peak_1689	709	.	28.7144	74.721	70.9254	112	TRUE	FALSE	FALSE
chr1	49650893	49651026	Nanog_dome_peak_1694	154	.	10.6144	18.2424	15.4101	41	TRUE	FALSE	FALSE
chr1	49789691	49789844	Nanog_dome_peak_1696	175	.	11.4629	20.4311	17.5404	63	TRUE	FALSE	TRUE
chr1	49812537	49812823	Nanog_dome_peak_1697	187	.	10.4925	21.6962	18.7743	166	TRUE	FALSE	TRUE
chr1	49814380	49814519	Nanog_dome_peak_1698	326	.	14.8128	35.884	32.6659	55	TRUE	FALSE	TRUE
chr1	49819382	49819712	Nanog_dome_peak_1699	222	.	12.3059	25.2839	22.2778	213	FALSE	TRUE	TRUE
chr1	49932012	49932194	Nanog_dome_peak_1701	168	.	11.3749	19.6957	16.8244	98	TRUE	FALSE	FALSE
chr1	50527946	50528155	Nanog_dome_peak_1709	591	.	25.7222	62.8268	59.1903	125	TRUE	FALSE	FALSE
chr1	50534641	50534864	Nanog_dome_peak_1710	450	.	19.6543	48.5147	45.0855	112	FALSE	FALSE	TRUE
chr1	50611044	50611178	Nanog_dome_peak_1713	172	.	11.5416	20.0893	17.2072	60	TRUE	FALSE	TRUE
chr1	50697927	50698137	Nanog_dome_peak_1714	171	.	10.7549	20.0552	17.1746	72	TRUE	TRUE	TRUE
chr1	50710457	50710673	Nanog_dome_peak_1716	162	.	10.9135	19.0907	16.2353	147	TRUE	FALSE	TRUE
chr1	50730257	50730508	Nanog_dome_peak_1717	554	.	21.5825	59.0693	55.4849	106	FALSE	FALSE	TRUE
chr1	50751678	50751990	Nanog_dome_peak_1719	142	.	10.0914	17.0092	14.2112	164	TRUE	TRUE	TRUE
[truncated: 14,846 more rows]

## Sheet: Pou5f3 dome FitCUT&RUN
chrom	start	end	name	score	strand	signalValue	pValue	qValue	peak	FitCUT&RUN specific	contain pou5f3 motif
[truncated: 1,346 more rows]

[truncated: 1 more sheets: Sox19b dome FitCUT&RUN]
