# Supplementary material for: Antibody-free profiling of transcription factor occupancy during early embryogenesis by FitCUT&RUN
Source: HighWire-hosted journal article supplement (doi:10.1101/gr.275837.121), 2021-12-29
Supplement: Supplemental_Table_S5.xlsx [file Supplemental_Table_S5.xlsx]

## Sheet: Nanog pre-MBT target
Supplemental Table S5. Nanog target genes.
Gene	first-wave transcribed genes	early ZGA genes	Nanog binding cluster (NBC) target	down-regulated in nanog MO 4hpf (Lee, et al. 2013 Nature)	down-regulated in nanog MO 6hpf (Lee, et al. 2013 Nature)
ENSDARG00000116145	FALSE	FALSE	FALSE	FALSE	FALSE
ENSDARG00000019941	FALSE	FALSE	FALSE	FALSE	FALSE
ENSDARG00000081946	FALSE	FALSE	FALSE	FALSE	FALSE
ENSDARG00000094512	FALSE	FALSE	FALSE	FALSE	FALSE
ENSDARG00000015906	TRUE	TRUE	FALSE	TRUE	TRUE
ENSDARG00000038900	FALSE	FALSE	FALSE	FALSE	FALSE
ENSDARG00000094270	FALSE	FALSE	FALSE	FALSE	FALSE
ENSDARG00000030108	FALSE	FALSE	FALSE	FALSE	FALSE
ENSDARG00000037178	TRUE	TRUE	TRUE	TRUE	TRUE
ENSDARG00000053074	FALSE	FALSE	FALSE	FALSE	FALSE
ENSDARG00000076480	FALSE	FALSE	FALSE	FALSE	FALSE
ENSDARG00000111235	FALSE	FALSE	FALSE	FALSE	FALSE
ENSDARG00000104696	FALSE	FALSE	FALSE	FALSE	FALSE
ENSDARG00000109889	FALSE	FALSE	FALSE	FALSE	FALSE
ENSDARG00000074509	FALSE	FALSE	FALSE	FALSE	FALSE
ENSDARG00000021566	FALSE	FALSE	FALSE	FALSE	TRUE
ENSDARG00000070187	FALSE	FALSE	FALSE	FALSE	FALSE
ENSDARG00000115871	FALSE	FALSE	FALSE	FALSE	FALSE
ENSDARG00000029263	FALSE	FALSE	FALSE	FALSE	FALSE
ENSDARG00000075129	FALSE	FALSE	FALSE	FALSE	FALSE
ENSDARG00000004581	FALSE	FALSE	FALSE	FALSE	FALSE
ENSDARG00000115466	FALSE	FALSE	FALSE	FALSE	FALSE
ENSDARG00000098665	FALSE	FALSE	FALSE	FALSE	FALSE
ENSDARG00000111442	FALSE	FALSE	FALSE	FALSE	FALSE
ENSDARG00000062289	FALSE	FALSE	TRUE	FALSE	FALSE
ENSDARG00000079238	FALSE	FALSE	FALSE	FALSE	FALSE
ENSDARG00000082394	FALSE	FALSE	FALSE	FALSE	FALSE
ENSDARG00000006389	FALSE	FALSE	FALSE	FALSE	FALSE
ENSDARG00000063309	FALSE	FALSE	FALSE	FALSE	FALSE
ENSDARG00000000503	FALSE	FALSE	FALSE	FALSE	FALSE
ENSDARG00000102458	FALSE	FALSE	FALSE	FALSE	FALSE
ENSDARG00000032327	FALSE	FALSE	FALSE	FALSE	TRUE
ENSDARG00000071213	FALSE	FALSE	FALSE	FALSE	FALSE
ENSDARG00000103537	FALSE	FALSE	FALSE	FALSE	FALSE
ENSDARG00000030830	FALSE	FALSE	FALSE	FALSE	FALSE
ENSDARG00000053291	TRUE	TRUE	FALSE	FALSE	TRUE
ENSDARG00000116749	FALSE	FALSE	FALSE	FALSE	FALSE
ENSDARG00000030703	FALSE	TRUE	FALSE	FALSE	FALSE
ENSDARG00000014098	FALSE	FALSE	FALSE	FALSE	TRUE
ENSDARG00000052334	FALSE	FALSE	TRUE	FALSE	FALSE
ENSDARG00000023272	FALSE	FALSE	FALSE	FALSE	FALSE
ENSDARG00000070214	FALSE	FALSE	FALSE	FALSE	FALSE
ENSDARG00000005948	FALSE	FALSE	FALSE	FALSE	FALSE
ENSDARG00000040644	FALSE	FALSE	FALSE	FALSE	FALSE
ENSDARG00000044422	FALSE	FALSE	FALSE	FALSE	FALSE
ENSDARG00000099693	FALSE	FALSE	FALSE	FALSE	FALSE
ENSDARG00000098142	FALSE	FALSE	FALSE	FALSE	FALSE
ENSDARG00000103727	FALSE	FALSE	FALSE	FALSE	FALSE
ENSDARG00000010432	FALSE	FALSE	FALSE	FALSE	FALSE
ENSDARG00000060103	FALSE	FALSE	FALSE	FALSE	FALSE
ENSDARG00000018259	FALSE	FALSE	FALSE	FALSE	FALSE
ENSDARG00000094193	FALSE	FALSE	FALSE	FALSE	FALSE
ENSDARG00000092738	FALSE	FALSE	FALSE	FALSE	FALSE
ENSDARG00000019365	FALSE	FALSE	FALSE	FALSE	TRUE
ENSDARG00000079699	FALSE	FALSE	FALSE	FALSE	FALSE
ENSDARG00000054378	FALSE	FALSE	FALSE	FALSE	FALSE
ENSDARG00000052435	FALSE	FALSE	FALSE	FALSE	FALSE
ENSDARG00000087564	FALSE	FALSE	FALSE	FALSE	FALSE
ENSDARG00000035175	FALSE	FALSE	FALSE	FALSE	FALSE
ENSDARG00000059945	FALSE	FALSE	FALSE	FALSE	FALSE
ENSDARG00000015790	FALSE	FALSE	FALSE	TRUE	TRUE
ENSDARG00000025372	TRUE	TRUE	TRUE	TRUE	TRUE
ENSDARG00000116475	FALSE	FALSE	FALSE	FALSE	FALSE
ENSDARG00000013056	FALSE	FALSE	FALSE	FALSE	TRUE
ENSDARG00000070043	FALSE	FALSE	TRUE	FALSE	TRUE
ENSDARG00000095606	FALSE	FALSE	FALSE	FALSE	FALSE
ENSDARG00000018716	FALSE	FALSE	TRUE	FALSE	FALSE
ENSDARG00000099175	FALSE	FALSE	FALSE	FALSE	FALSE
ENSDARG00000009685	FALSE	FALSE	FALSE	FALSE	TRUE
ENSDARG00000097054	FALSE	FALSE	FALSE	FALSE	FALSE
ENSDARG00000074533	FALSE	FALSE	FALSE	FALSE	FALSE
ENSDARG00000089646	FALSE	FALSE	FALSE	FALSE	FALSE
ENSDARG00000007195	FALSE	FALSE	FALSE	FALSE	FALSE
ENSDARG00000071044	FALSE	FALSE	FALSE	FALSE	FALSE
ENSDARG00000097947	FALSE	FALSE	TRUE	FALSE	FALSE
ENSDARG00000086927	FALSE	FALSE	TRUE	FALSE	FALSE
ENSDARG00000011770	FALSE	FALSE	FALSE	FALSE	FALSE
ENSDARG00000103961	FALSE	FALSE	FALSE	FALSE	FALSE
ENSDARG00000080174	FALSE	FALSE	TRUE	FALSE	FALSE
ENSDARG00000055226	FALSE	FALSE	FALSE	FALSE	FALSE
ENSDARG00000053728	FALSE	FALSE	FALSE	FALSE	FALSE
ENSDARG00000002877	FALSE	FALSE	FALSE	FALSE	FALSE
ENSDARG00000113073	FALSE	FALSE	FALSE	FALSE	FALSE
ENSDARG00000070442	FALSE	FALSE	FALSE	FALSE	FALSE
ENSDARG00000031316	FALSE	FALSE	FALSE	FALSE	FALSE
ENSDARG00000033009	FALSE	FALSE	FALSE	FALSE	TRUE
ENSDARG00000057691	FALSE	FALSE	FALSE	FALSE	TRUE
ENSDARG00000045422	FALSE	FALSE	FALSE	FALSE	FALSE
ENSDARG00000027590	FALSE	FALSE	FALSE	FALSE	FALSE
ENSDARG00000101169	FALSE	FALSE	FALSE	FALSE	FALSE
ENSDARG00000114192	FALSE	FALSE	FALSE	FALSE	FALSE
ENSDARG00000116403	FALSE	FALSE	FALSE	FALSE	FALSE
ENSDARG00000097300	FALSE	FALSE	FALSE	FALSE	FALSE
ENSDARG00000024365	FALSE	FALSE	FALSE	FALSE	FALSE
ENSDARG00000111781	FALSE	FALSE	FALSE	FALSE	FALSE
ENSDARG00000054031	FALSE	FALSE	FALSE	FALSE	FALSE
ENSDARG00000111237	FALSE	FALSE	FALSE	FALSE	FALSE
ENSDARG00000077013	FALSE	FALSE	FALSE	FALSE	TRUE
ENSDARG00000013161	FALSE	FALSE	FALSE	FALSE	FALSE
ENSDARG00000104199	FALSE	FALSE	FALSE	FALSE	FALSE
ENSDARG00000023815	FALSE	FALSE	FALSE	FALSE	FALSE
ENSDARG00000097033	FALSE	FALSE	FALSE	FALSE	FALSE
ENSDARG00000114255	FALSE	FALSE	FALSE	FALSE	FALSE
ENSDARG00000112863	FALSE	FALSE	FALSE	FALSE	FALSE
ENSDARG00000029308	FALSE	FALSE	FALSE	FALSE	FALSE
ENSDARG00000068965	FALSE	FALSE	FALSE	FALSE	TRUE
ENSDARG00000079946	FALSE	FALSE	FALSE	FALSE	FALSE
ENSDARG00000055078	FALSE	FALSE	FALSE	FALSE	FALSE
ENSDARG00000068372	FALSE	FALSE	FALSE	FALSE	FALSE
ENSDARG00000056561	TRUE	TRUE	FALSE	TRUE	TRUE
ENSDARG00000012667	FALSE	FALSE	FALSE	FALSE	FALSE
ENSDARG00000103648	FALSE	FALSE	FALSE	FALSE	FALSE
ENSDARG00000020008	FALSE	FALSE	FALSE	FALSE	FALSE
ENSDARG00000095507	FALSE	FALSE	FALSE	FALSE	FALSE
ENSDARG00000013670	FALSE	FALSE	FALSE	FALSE	FALSE
ENSDARG00000098199	FALSE	FALSE	FALSE	FALSE	FALSE
ENSDARG00000051785	FALSE	FALSE	FALSE	FALSE	FALSE
ENSDARG00000074531	FALSE	FALSE	FALSE	FALSE	FALSE
ENSDARG00000035715	TRUE	TRUE	FALSE	TRUE	TRUE
ENSDARG00000112126	FALSE	FALSE	FALSE	FALSE	FALSE
ENSDARG00000112164	FALSE	FALSE	FALSE	FALSE	FALSE
ENSDARG00000023914	FALSE	FALSE	FALSE	FALSE	FALSE
ENSDARG00000110967	FALSE	FALSE	FALSE	FALSE	FALSE
ENSDARG00000054931	FALSE	FALSE	FALSE	FALSE	FALSE
ENSDARG00000096751	FALSE	FALSE	FALSE	FALSE	FALSE
ENSDARG00000018508	FALSE	FALSE	FALSE	FALSE	TRUE
ENSDARG00000055630	TRUE	TRUE	FALSE	TRUE	TRUE
ENSDARG00000044074	FALSE	FALSE	FALSE	FALSE	FALSE
ENSDARG00000060415	FALSE	FALSE	FALSE	FALSE	FALSE
ENSDARG00000068820	FALSE	FALSE	FALSE	FALSE	FALSE
ENSDARG00000034222	FALSE	FALSE	FALSE	FALSE	TRUE
ENSDARG00000104270	FALSE	FALSE	FALSE	FALSE	FALSE
ENSDARG00000038064	FALSE	FALSE	TRUE	FALSE	FALSE
ENSDARG00000045626	FALSE	FALSE	FALSE	FALSE	FALSE
ENSDARG00000116546	FALSE	FALSE	FALSE	FALSE	FALSE
ENSDARG00000061385	FALSE	FALSE	FALSE	FALSE	FALSE
ENSDARG00000032708	FALSE	FALSE	FALSE	FALSE	FALSE
ENSDARG00000042759	FALSE	FALSE	FALSE	FALSE	FALSE
ENSDARG00000069790	FALSE	FALSE	FALSE	FALSE	TRUE
ENSDARG00000070930	FALSE	FALSE	FALSE	FALSE	FALSE
ENSDARG00000054804	FALSE	FALSE	FALSE	TRUE	TRUE
ENSDARG00000025667	FALSE	FALSE	FALSE	FALSE	FALSE
ENSDARG00000030347	FALSE	FALSE	FALSE	FALSE	FALSE
ENSDARG00000100483	FALSE	FALSE	TRUE	FALSE	FALSE
ENSDARG00000097686	FALSE	FALSE	FALSE	FALSE	FALSE
ENSDARG00000041430	TRUE	TRUE	TRUE	TRUE	TRUE
ENSDARG00000081623	FALSE	FALSE	TRUE	FALSE	FALSE
ENSDARG00000044691	FALSE	FALSE	FALSE	FALSE	FALSE
ENSDARG00000115369	FALSE	FALSE	FALSE	FALSE	FALSE
ENSDARG00000042840	FALSE	FALSE	FALSE	FALSE	FALSE
ENSDARG00000041107	FALSE	FALSE	FALSE	FALSE	FALSE
ENSDARG00000095502	FALSE	FALSE	FALSE	FALSE	FALSE
ENSDARG00000110116	FALSE	FALSE	FALSE	FALSE	FALSE
ENSDARG00000082615	FALSE	FALSE	FALSE	FALSE	FALSE
ENSDARG00000018121	FALSE	FALSE	FALSE	FALSE	FALSE
ENSDARG00000077284	FALSE	FALSE	FALSE	FALSE	FALSE
ENSDARG00000038154	FALSE	FALSE	FALSE	FALSE	FALSE
ENSDARG00000063182	FALSE	FALSE	FALSE	FALSE	FALSE
ENSDARG00000022085	FALSE	FALSE	FALSE	FALSE	FALSE
ENSDARG00000069044	FALSE	FALSE	FALSE	FALSE	TRUE
ENSDARG00000006434	FALSE	FALSE	TRUE	FALSE	TRUE
ENSDARG00000096610	FALSE	FALSE	FALSE	FALSE	FALSE
ENSDARG00000091917	FALSE	FALSE	FALSE	FALSE	FALSE
ENSDARG00000055314	FALSE	FALSE	FALSE	FALSE	TRUE
ENSDARG00000057143	FALSE	FALSE	FALSE	FALSE	TRUE
ENSDARG00000094794	FALSE	FALSE	FALSE	FALSE	FALSE
ENSDARG00000115644	FALSE	FALSE	FALSE	FALSE	FALSE
ENSDARG00000103522	FALSE	FALSE	FALSE	FALSE	FALSE
ENSDARG00000088798	FALSE	FALSE	FALSE	FALSE	FALSE
ENSDARG00000096829	FALSE	FALSE	FALSE	FALSE	FALSE
ENSDARG00000039022	FALSE	FALSE	FALSE	FALSE	FALSE
ENSDARG00000068434	FALSE	FALSE	FALSE	FALSE	FALSE
ENSDARG00000005559	FALSE	FALSE	FALSE	FALSE	FALSE
ENSDARG00000101297	FALSE	FALSE	FALSE	FALSE	FALSE
ENSDARG00000104825	FALSE	FALSE	FALSE	FALSE	FALSE
ENSDARG00000092115	TRUE	FALSE	FALSE	FALSE	TRUE
ENSDARG00000045092	FALSE	FALSE	FALSE	FALSE	FALSE
ENSDARG00000028322	FALSE	FALSE	FALSE	FALSE	FALSE
ENSDARG00000095081	FALSE	FALSE	TRUE	FALSE	FALSE
ENSDARG00000071037	FALSE	FALSE	FALSE	FALSE	FALSE
ENSDARG00000013307	FALSE	FALSE	FALSE	FALSE	FALSE
ENSDARG00000075650	FALSE	FALSE	FALSE	FALSE	FALSE
ENSDARG00000002533	FALSE	FALSE	FALSE	FALSE	FALSE
ENSDARG00000114211	FALSE	FALSE	FALSE	FALSE	FALSE
ENSDARG00000102832	FALSE	FALSE	FALSE	FALSE	FALSE
ENSDARG00000097159	FALSE	FALSE	FALSE	FALSE	FALSE
ENSDARG00000075132	FALSE	FALSE	TRUE	FALSE	FALSE
ENSDARG00000114485	FALSE	FALSE	FALSE	FALSE	FALSE
ENSDARG00000055108	FALSE	FALSE	FALSE	FALSE	FALSE
ENSDARG00000035993	FALSE	FALSE	FALSE	FALSE	TRUE
ENSDARG00000115383	FALSE	FALSE	FALSE	FALSE	FALSE
ENSDARG00000016867	FALSE	FALSE	FALSE	FALSE	FALSE
ENSDARG00000096664	FALSE	FALSE	FALSE	FALSE	FALSE
ENSDARG00000099227	FALSE	FALSE	FALSE	FALSE	FALSE
ENSDARG00000057633	TRUE	TRUE	TRUE	TRUE	TRUE
ENSDARG00000096554	FALSE	FALSE	FALSE	FALSE	FALSE
ENSDARG00000096957	FALSE	FALSE	FALSE	FALSE	FALSE
ENSDARG00000116261	FALSE	FALSE	FALSE	FALSE	FALSE
ENSDARG00000102879	FALSE	FALSE	FALSE	FALSE	FALSE
ENSDARG00000097286	FALSE	FALSE	FALSE	FALSE	FALSE
ENSDARG00000100312	FALSE	FALSE	FALSE	FALSE	FALSE
ENSDARG00000105133	FALSE	FALSE	FALSE	FALSE	FALSE
ENSDARG00000045557	FALSE	FALSE	FALSE	FALSE	FALSE
ENSDARG00000012044	FALSE	FALSE	FALSE	TRUE	TRUE
ENSDARG00000094881	FALSE	FALSE	FALSE	FALSE	FALSE
ENSDARG00000054023	FALSE	FALSE	FALSE	FALSE	FALSE
ENSDARG00000115426	FALSE	FALSE	FALSE	FALSE	FALSE
ENSDARG00000077909	FALSE	FALSE	FALSE	FALSE	FALSE
ENSDARG00000052966	FALSE	FALSE	FALSE	FALSE	FALSE
ENSDARG00000114213	FALSE	FALSE	FALSE	FALSE	FALSE
ENSDARG00000115317	FALSE	FALSE	FALSE	FALSE	FALSE
ENSDARG00000104125	FALSE	FALSE	FALSE	FALSE	FALSE
ENSDARG00000034907	FALSE	FALSE	FALSE	FALSE	FALSE
ENSDARG00000040503	FALSE	TRUE	FALSE	TRUE	TRUE
ENSDARG00000077631	FALSE	TRUE	TRUE	FALSE	TRUE
ENSDARG00000078752	FALSE	FALSE	FALSE	FALSE	FALSE
ENSDARG00000110956	FALSE	FALSE	FALSE	FALSE	FALSE
ENSDARG00000054754	FALSE	FALSE	FALSE	FALSE	FALSE
ENSDARG00000004256	TRUE	TRUE	TRUE	FALSE	FALSE
ENSDARG00000005210	FALSE	FALSE	FALSE	FALSE	FALSE
ENSDARG00000062948	FALSE	FALSE	TRUE	FALSE	FALSE
ENSDARG00000070961	FALSE	FALSE	FALSE	FALSE	FALSE
ENSDARG00000002167	FALSE	FALSE	FALSE	FALSE	FALSE
ENSDARG00000079373	FALSE	FALSE	FALSE	FALSE	FALSE
ENSDARG00000038909	FALSE	FALSE	FALSE	FALSE	TRUE
ENSDARG00000093041	FALSE	FALSE	FALSE	FALSE	FALSE
ENSDARG00000008372	FALSE	FALSE	FALSE	FALSE	FALSE
ENSDARG00000070053	FALSE	FALSE	FALSE	FALSE	FALSE
ENSDARG00000063292	FALSE	FALSE	FALSE	FALSE	FALSE
ENSDARG00000068572	FALSE	FALSE	TRUE	TRUE	TRUE
ENSDARG00000109967	FALSE	FALSE	FALSE	FALSE	FALSE
ENSDARG00000101052	FALSE	FALSE	FALSE	FALSE	FALSE
ENSDARG00000023214	TRUE	FALSE	FALSE	FALSE	FALSE
ENSDARG00000012745	FALSE	FALSE	FALSE	FALSE	FALSE
ENSDARG00000057497	FALSE	FALSE	TRUE	FALSE	FALSE
ENSDARG00000004621	FALSE	FALSE	FALSE	FALSE	FALSE
ENSDARG00000076805	FALSE	FALSE	FALSE	FALSE	FALSE
ENSDARG00000079009	FALSE	FALSE	FALSE	FALSE	TRUE
ENSDARG00000078002	FALSE	FALSE	FALSE	FALSE	FALSE
ENSDARG00000028017	TRUE	TRUE	FALSE	FALSE	FALSE
ENSDARG00000069065	FALSE	FALSE	FALSE	FALSE	FALSE
ENSDARG00000053569	TRUE	TRUE	TRUE	TRUE	TRUE
ENSDARG00000103308	FALSE	FALSE	FALSE	FALSE	FALSE
ENSDARG00000113089	FALSE	FALSE	FALSE	FALSE	FALSE
ENSDARG00000053691	FALSE	FALSE	FALSE	FALSE	FALSE
ENSDARG00000111325	FALSE	FALSE	FALSE	FALSE	FALSE
ENSDARG00000021004	FALSE	FALSE	FALSE	FALSE	FALSE
ENSDARG00000109597	FALSE	FALSE	FALSE	FALSE	FALSE
ENSDARG00000033567	FALSE	FALSE	FALSE	FALSE	TRUE
ENSDARG00000097596	FALSE	FALSE	FALSE	FALSE	FALSE
ENSDARG00000100272	FALSE	FALSE	FALSE	FALSE	FALSE
ENSDARG00000055561	FALSE	FALSE	FALSE	FALSE	FALSE
ENSDARG00000011597	FALSE	FALSE	FALSE	FALSE	TRUE
ENSDARG00000098436	FALSE	FALSE	FALSE	FALSE	FALSE
ENSDARG00000061187	FALSE	FALSE	TRUE	FALSE	TRUE
ENSDARG00000116273	FALSE	FALSE	FALSE	FALSE	FALSE
ENSDARG00000099134	FALSE	FALSE	FALSE	FALSE	FALSE
ENSDARG00000038476	FALSE	FALSE	FALSE	FALSE	FALSE
ENSDARG00000089109	FALSE	FALSE	FALSE	FALSE	FALSE
ENSDARG00000076004	FALSE	FALSE	FALSE	FALSE	FALSE
ENSDARG00000078011	FALSE	FALSE	FALSE	FALSE	TRUE
ENSDARG00000001470	FALSE	FALSE	FALSE	FALSE	FALSE
ENSDARG00000011727	FALSE	FALSE	FALSE	FALSE	FALSE
ENSDARG00000052494	FALSE	FALSE	TRUE	FALSE	TRUE
ENSDARG00000061255	FALSE	FALSE	FALSE	FALSE	FALSE
ENSDARG00000022303	FALSE	FALSE	FALSE	FALSE	FALSE
ENSDARG00000092155	FALSE	FALSE	FALSE	FALSE	TRUE
ENSDARG00000099001	FALSE	FALSE	FALSE	FALSE	FALSE
ENSDARG00000016307	FALSE	FALSE	FALSE	FALSE	FALSE
ENSDARG00000037618	TRUE	FALSE	FALSE	FALSE	FALSE
ENSDARG00000015567	FALSE	FALSE	FALSE	FALSE	FALSE
ENSDARG00000053684	FALSE	FALSE	FALSE	TRUE	TRUE
ENSDARG00000069006	FALSE	FALSE	TRUE	FALSE	TRUE
ENSDARG00000101894	FALSE	FALSE	FALSE	FALSE	FALSE
ENSDARG00000027403	FALSE	FALSE	FALSE	FALSE	FALSE
ENSDARG00000059768	FALSE	FALSE	FALSE	FALSE	FALSE
ENSDARG00000073900	FALSE	FALSE	FALSE	FALSE	FALSE
ENSDARG00000078507	FALSE	FALSE	FALSE	TRUE	TRUE
ENSDARG00000069866	FALSE	FALSE	FALSE	FALSE	FALSE
ENSDARG00000069734	FALSE	FALSE	FALSE	FALSE	FALSE
ENSDARG00000031983	FALSE	FALSE	FALSE	FALSE	FALSE
ENSDARG00000092750	FALSE	FALSE	FALSE	FALSE	FALSE
ENSDARG00000077610	FALSE	FALSE	FALSE	FALSE	FALSE
ENSDARG00000060529	FALSE	FALSE	FALSE	FALSE	FALSE
ENSDARG00000110229	FALSE	FALSE	FALSE	FALSE	FALSE
ENSDARG00000018997	FALSE	FALSE	FALSE	FALSE	FALSE
ENSDARG00000043185	FALSE	FALSE	FALSE	FALSE	FALSE
ENSDARG00000044949	FALSE	FALSE	FALSE	FALSE	FALSE
ENSDARG00000044692	FALSE	FALSE	FALSE	FALSE	FALSE
ENSDARG00000086471	FALSE	FALSE	FALSE	FALSE	FALSE
ENSDARG00000100891	FALSE	FALSE	FALSE	FALSE	FALSE
ENSDARG00000095728	FALSE	FALSE	FALSE	FALSE	FALSE
ENSDARG00000061017	FALSE	FALSE	FALSE	FALSE	TRUE
ENSDARG00000031548	FALSE	FALSE	FALSE	FALSE	TRUE
ENSDARG00000039943	TRUE	TRUE	TRUE	TRUE	TRUE
ENSDARG00000056438	FALSE	FALSE	FALSE	FALSE	FALSE
ENSDARG00000056395	FALSE	FALSE	FALSE	FALSE	TRUE
ENSDARG00000087196	FALSE	FALSE	FALSE	FALSE	FALSE
ENSDARG00000007323	FALSE	FALSE	FALSE	FALSE	FALSE
ENSDARG00000093983	FALSE	FALSE	FALSE	FALSE	FALSE
ENSDARG00000091317	FALSE	FALSE	FALSE	FALSE	FALSE
ENSDARG00000075917	FALSE	FALSE	FALSE	FALSE	FALSE
ENSDARG00000097102	FALSE	FALSE	FALSE	FALSE	FALSE
ENSDARG00000005058	TRUE	TRUE	FALSE	TRUE	TRUE
ENSDARG00000018145	FALSE	FALSE	FALSE	FALSE	FALSE
ENSDARG00000105892	FALSE	FALSE	FALSE	FALSE	FALSE
ENSDARG00000075333	FALSE	FALSE	TRUE	FALSE	FALSE
ENSDARG00000055786	FALSE	FALSE	FALSE	FALSE	FALSE
ENSDARG00000029406	FALSE	FALSE	FALSE	FALSE	FALSE
ENSDARG00000000943	FALSE	FALSE	TRUE	FALSE	TRUE
ENSDARG00000071347	FALSE	FALSE	FALSE	FALSE	FALSE
ENSDARG00000027169	FALSE	FALSE	FALSE	FALSE	FALSE
ENSDARG00000097317	FALSE	FALSE	FALSE	FALSE	FALSE
ENSDARG00000099291	FALSE	FALSE	FALSE	FALSE	FALSE
ENSDARG00000002332	FALSE	FALSE	FALSE	FALSE	TRUE
ENSDARG00000031647	FALSE	FALSE	FALSE	FALSE	FALSE
ENSDARG00000059109	FALSE	FALSE	FALSE	FALSE	FALSE
ENSDARG00000019335	FALSE	FALSE	FALSE	FALSE	TRUE
ENSDARG00000115081	FALSE	FALSE	FALSE	FALSE	FALSE
ENSDARG00000054154	FALSE	FALSE	FALSE	FALSE	TRUE
ENSDARG00000062873	FALSE	FALSE	FALSE	FALSE	FALSE
ENSDARG00000004714	FALSE	FALSE	FALSE	FALSE	FALSE
ENSDARG00000088927	TRUE	FALSE	FALSE	TRUE	TRUE
ENSDARG00000038561	FALSE	FALSE	FALSE	FALSE	FALSE
ENSDARG00000036816	FALSE	FALSE	FALSE	FALSE	FALSE
ENSDARG00000068365	FALSE	FALSE	FALSE	FALSE	FALSE
ENSDARG00000115716	FALSE	FALSE	FALSE	FALSE	FALSE
ENSDARG00000077840	FALSE	FALSE	FALSE	FALSE	FALSE
ENSDARG00000004328	FALSE	FALSE	FALSE	FALSE	FALSE
ENSDARG00000010097	FALSE	FALSE	TRUE	FALSE	FALSE
ENSDARG00000113306	FALSE	FALSE	FALSE	FALSE	FALSE
ENSDARG00000077506	FALSE	FALSE	TRUE	FALSE	FALSE
ENSDARG00000042848	FALSE	FALSE	FALSE	FALSE	FALSE
ENSDARG00000029722	TRUE	FALSE	FALSE	FALSE	TRUE
ENSDARG00000016056	FALSE	FALSE	FALSE	FALSE	FALSE
ENSDARG00000015662	FALSE	FALSE	FALSE	FALSE	TRUE
ENSDARG00000111340	FALSE	FALSE	FALSE	FALSE	FALSE
ENSDARG00000095571	FALSE	FALSE	FALSE	FALSE	FALSE
ENSDARG00000079317	FALSE	FALSE	FALSE	FALSE	FALSE
ENSDARG00000016513	FALSE	FALSE	FALSE	FALSE	FALSE
ENSDARG00000116477	FALSE	FALSE	FALSE	FALSE	FALSE
ENSDARG00000056036	FALSE	FALSE	FALSE	FALSE	FALSE
ENSDARG00000074301	FALSE	FALSE	FALSE	FALSE	TRUE
ENSDARG00000051731	FALSE	FALSE	FALSE	FALSE	FALSE
ENSDARG00000101006	FALSE	FALSE	FALSE	FALSE	FALSE
ENSDARG00000009250	FALSE	FALSE	FALSE	FALSE	FALSE
ENSDARG00000083378	FALSE	FALSE	FALSE	FALSE	FALSE
ENSDARG00000105634	FALSE	FALSE	FALSE	FALSE	FALSE
ENSDARG00000105317	FALSE	FALSE	FALSE	FALSE	FALSE
ENSDARG00000004232	FALSE	FALSE	FALSE	FALSE	FALSE
ENSDARG00000052649	FALSE	FALSE	FALSE	FALSE	TRUE
ENSDARG00000071555	FALSE	FALSE	FALSE	FALSE	FALSE
ENSDARG00000104487	FALSE	FALSE	FALSE	FALSE	FALSE
ENSDARG00000075743	FALSE	FALSE	FALSE	FALSE	FALSE
ENSDARG00000001769	FALSE	FALSE	FALSE	FALSE	FALSE
ENSDARG00000036335	FALSE	FALSE	FALSE	FALSE	FALSE
ENSDARG00000112693	FALSE	FALSE	FALSE	FALSE	FALSE
ENSDARG00000007916	FALSE	FALSE	TRUE	FALSE	FALSE
ENSDARG00000013613	FALSE	FALSE	FALSE	FALSE	FALSE
ENSDARG00000040295	TRUE	TRUE	TRUE	TRUE	TRUE
ENSDARG00000101624	FALSE	FALSE	FALSE	FALSE	FALSE
ENSDARG00000023927	FALSE	FALSE	FALSE	FALSE	FALSE
ENSDARG00000011609	FALSE	FALSE	FALSE	FALSE	FALSE
ENSDARG00000058379	FALSE	FALSE	FALSE	FALSE	TRUE
ENSDARG00000002601	TRUE	TRUE	FALSE	FALSE	FALSE
ENSDARG00000078281	FALSE	FALSE	FALSE	FALSE	FALSE
ENSDARG00000117541	FALSE	FALSE	FALSE	FALSE	FALSE
ENSDARG00000111690	FALSE	FALSE	FALSE	FALSE	FALSE
ENSDARG00000100256	FALSE	FALSE	FALSE	FALSE	FALSE
ENSDARG00000114347	FALSE	FALSE	FALSE	FALSE	FALSE
ENSDARG00000038428	FALSE	FALSE	FALSE	TRUE	FALSE
ENSDARG00000115901	FALSE	FALSE	FALSE	FALSE	FALSE
ENSDARG00000018162	FALSE	FALSE	FALSE	FALSE	FALSE
ENSDARG00000059333	FALSE	FALSE	FALSE	FALSE	TRUE
ENSDARG00000117364	FALSE	FALSE	FALSE	FALSE	FALSE
ENSDARG00000077751	FALSE	FALSE	FALSE	FALSE	FALSE
ENSDARG00000111709	FALSE	FALSE	FALSE	FALSE	FALSE
ENSDARG00000021112	FALSE	FALSE	FALSE	FALSE	FALSE
ENSDARG00000114818	FALSE	FALSE	FALSE	FALSE	FALSE
ENSDARG00000036162	FALSE	TRUE	FALSE	FALSE	TRUE
ENSDARG00000039350	FALSE	FALSE	FALSE	FALSE	FALSE
ENSDARG00000041617	FALSE	FALSE	FALSE	FALSE	FALSE
ENSDARG00000004840	FALSE	FALSE	FALSE	FALSE	TRUE
ENSDARG00000013681	FALSE	FALSE	FALSE	FALSE	FALSE
ENSDARG00000036754	FALSE	FALSE	FALSE	FALSE	FALSE
ENSDARG00000040623	FALSE	FALSE	FALSE	FALSE	FALSE
ENSDARG00000016875	FALSE	FALSE	FALSE	FALSE	FALSE
ENSDARG00000087793	FALSE	FALSE	FALSE	FALSE	TRUE
ENSDARG00000015709	FALSE	FALSE	FALSE	TRUE	TRUE
ENSDARG00000109709	FALSE	FALSE	FALSE	FALSE	FALSE
ENSDARG00000104097	FALSE	FALSE	FALSE	FALSE	FALSE
ENSDARG00000075113	TRUE	TRUE	FALSE	TRUE	FALSE
ENSDARG00000103985	FALSE	FALSE	FALSE	FALSE	FALSE
ENSDARG00000115456	FALSE	FALSE	FALSE	FALSE	FALSE
ENSDARG00000042122	FALSE	FALSE	FALSE	FALSE	FALSE
ENSDARG00000093118	FALSE	FALSE	FALSE	FALSE	FALSE
ENSDARG00000038938	FALSE	FALSE	FALSE	FALSE	FALSE
ENSDARG00000116992	FALSE	FALSE	FALSE	FALSE	FALSE
ENSDARG00000006408	FALSE	FALSE	FALSE	FALSE	FALSE
ENSDARG00000103025	FALSE	FALSE	FALSE	FALSE	FALSE
ENSDARG00000069196	FALSE	FALSE	FALSE	FALSE	FALSE
ENSDARG00000004748	FALSE	FALSE	FALSE	FALSE	TRUE
ENSDARG00000099374	FALSE	FALSE	FALSE	FALSE	FALSE
ENSDARG00000071150	FALSE	FALSE	FALSE	FALSE	FALSE
ENSDARG00000093030	FALSE	FALSE	FALSE	FALSE	FALSE
ENSDARG00000014943	FALSE	FALSE	FALSE	FALSE	FALSE
ENSDARG00000087388	FALSE	FALSE	FALSE	FALSE	FALSE
ENSDARG00000026170	FALSE	FALSE	FALSE	FALSE	FALSE
ENSDARG00000036292	FALSE	TRUE	FALSE	FALSE	TRUE
ENSDARG00000007385	FALSE	FALSE	FALSE	FALSE	TRUE
ENSDARG00000093284	TRUE	FALSE	FALSE	TRUE	TRUE
ENSDARG00000061992	FALSE	FALSE	FALSE	FALSE	TRUE
ENSDARG00000117456	FALSE	FALSE	FALSE	FALSE	FALSE
ENSDARG00000099195	FALSE	FALSE	FALSE	FALSE	FALSE
ENSDARG00000015221	FALSE	TRUE	FALSE	FALSE	FALSE
ENSDARG00000073931	FALSE	FALSE	FALSE	FALSE	FALSE
ENSDARG00000092650	FALSE	FALSE	FALSE	FALSE	FALSE
ENSDARG00000039830	FALSE	FALSE	FALSE	FALSE	FALSE
ENSDARG00000101549	FALSE	FALSE	FALSE	FALSE	FALSE
ENSDARG00000102810	FALSE	FALSE	FALSE	FALSE	FALSE
ENSDARG00000036338	FALSE	FALSE	FALSE	FALSE	FALSE
ENSDARG00000057166	FALSE	FALSE	FALSE	FALSE	FALSE
ENSDARG00000115288	FALSE	FALSE	FALSE	FALSE	FALSE
ENSDARG00000055066	FALSE	FALSE	FALSE	FALSE	FALSE
ENSDARG00000098427	FALSE	FALSE	FALSE	FALSE	FALSE
ENSDARG00000087611	FALSE	FALSE	FALSE	FALSE	FALSE
ENSDARG00000039263	FALSE	FALSE	FALSE	FALSE	FALSE
ENSDARG00000055381	TRUE	TRUE	TRUE	TRUE	TRUE
ENSDARG00000098135	FALSE	FALSE	FALSE	FALSE	FALSE
ENSDARG00000040141	TRUE	TRUE	FALSE	TRUE	TRUE
ENSDARG00000070914	TRUE	TRUE	TRUE	TRUE	TRUE
ENSDARG00000035095	TRUE	TRUE	TRUE	FALSE	TRUE
ENSDARG00000102138	FALSE	FALSE	FALSE	FALSE	FALSE
ENSDARG00000070656	FALSE	FALSE	FALSE	FALSE	FALSE
ENSDARG00000101576	FALSE	FALSE	FALSE	FALSE	FALSE
ENSDARG00000090943	FALSE	FALSE	FALSE	FALSE	FALSE
ENSDARG00000010042	FALSE	FALSE	FALSE	FALSE	FALSE
ENSDARG00000003570	FALSE	FALSE	FALSE	FALSE	FALSE
ENSDARG00000094859	TRUE	TRUE	FALSE	TRUE	TRUE
ENSDARG00000032765	FALSE	TRUE	FALSE	FALSE	TRUE
ENSDARG00000094527	FALSE	FALSE	FALSE	FALSE	FALSE
ENSDARG00000021392	FALSE	FALSE	FALSE	FALSE	FALSE
ENSDARG00000015915	FALSE	FALSE	FALSE	FALSE	FALSE
ENSDARG00000070584	FALSE	FALSE	FALSE	FALSE	FALSE
ENSDARG00000115102	FALSE	FALSE	FALSE	FALSE	FALSE
ENSDARG00000003399	FALSE	FALSE	TRUE	FALSE	FALSE
ENSDARG00000008832	FALSE	FALSE	FALSE	FALSE	FALSE
ENSDARG00000055966	FALSE	FALSE	FALSE	FALSE	FALSE
ENSDARG00000033655	FALSE	FALSE	FALSE	FALSE	FALSE
ENSDARG00000096602	FALSE	FALSE	FALSE	FALSE	FALSE
ENSDARG00000053966	FALSE	FALSE	FALSE	FALSE	FALSE
ENSDARG00000045036	FALSE	FALSE	FALSE	FALSE	TRUE
ENSDARG00000079352	FALSE	FALSE	FALSE	FALSE	FALSE
ENSDARG00000042319	FALSE	FALSE	FALSE	FALSE	TRUE
ENSDARG00000098651	FALSE	FALSE	FALSE	FALSE	FALSE
ENSDARG00000101918	FALSE	FALSE	FALSE	FALSE	FALSE
ENSDARG00000077740	FALSE	FALSE	FALSE	FALSE	FALSE
ENSDARG00000095635	TRUE	TRUE	TRUE	TRUE	TRUE
ENSDARG00000013031	FALSE	FALSE	FALSE	FALSE	FALSE
ENSDARG00000006200	FALSE	FALSE	FALSE	FALSE	TRUE
ENSDARG00000001859	FALSE	FALSE	FALSE	FALSE	FALSE
ENSDARG00000097211	FALSE	FALSE	TRUE	FALSE	FALSE
ENSDARG00000081103	FALSE	FALSE	FALSE	FALSE	FALSE
ENSDARG00000052348	FALSE	FALSE	FALSE	FALSE	TRUE
ENSDARG00000013351	TRUE	TRUE	FALSE	FALSE	TRUE
ENSDARG00000073747	FALSE	FALSE	FALSE	FALSE	FALSE
ENSDARG00000088165	FALSE	TRUE	FALSE	FALSE	FALSE
ENSDARG00000013669	FALSE	FALSE	FALSE	FALSE	FALSE
ENSDARG00000068883	FALSE	FALSE	FALSE	FALSE	FALSE
ENSDARG00000075826	FALSE	FALSE	FALSE	FALSE	FALSE
ENSDARG00000021466	FALSE	FALSE	FALSE	FALSE	FALSE
ENSDARG00000003446	FALSE	FALSE	FALSE	FALSE	TRUE
ENSDARG00000040245	FALSE	FALSE	FALSE	FALSE	FALSE
ENSDARG00000045661	FALSE	FALSE	FALSE	FALSE	FALSE
ENSDARG00000006399	FALSE	FALSE	FALSE	FALSE	FALSE
ENSDARG00000002750	FALSE	FALSE	FALSE	FALSE	TRUE
ENSDARG00000105510	FALSE	FALSE	FALSE	FALSE	FALSE
ENSDARG00000056954	FALSE	TRUE	FALSE	FALSE	FALSE
ENSDARG00000070491	FALSE	FALSE	FALSE	FALSE	FALSE
ENSDARG00000087094	FALSE	FALSE	TRUE	FALSE	FALSE
ENSDARG00000095189	FALSE	FALSE	FALSE	FALSE	FALSE
ENSDARG00000019920	TRUE	TRUE	FALSE	FALSE	FALSE
ENSDARG00000096992	FALSE	FALSE	FALSE	FALSE	FALSE
ENSDARG00000107506	FALSE	FALSE	FALSE	FALSE	FALSE
ENSDARG00000020574	FALSE	FALSE	FALSE	FALSE	FALSE
ENSDARG00000034396	FALSE	FALSE	FALSE	FALSE	FALSE
ENSDARG00000097411	FALSE	FALSE	FALSE	FALSE	FALSE
ENSDARG00000002779	FALSE	FALSE	FALSE	FALSE	FALSE
ENSDARG00000020702	FALSE	FALSE	FALSE	FALSE	TRUE
ENSDARG00000099471	FALSE	FALSE	FALSE	FALSE	FALSE
ENSDARG00000098240	FALSE	FALSE	FALSE	FALSE	FALSE
ENSDARG00000093407	FALSE	FALSE	FALSE	FALSE	FALSE
ENSDARG00000102040	FALSE	FALSE	FALSE	FALSE	FALSE
ENSDARG00000058702	FALSE	FALSE	FALSE	FALSE	FALSE
ENSDARG00000040606	FALSE	TRUE	FALSE	FALSE	TRUE
ENSDARG00000076763	FALSE	FALSE	FALSE	FALSE	FALSE
ENSDARG00000041959	TRUE	TRUE	TRUE	TRUE	TRUE
ENSDARG00000029292	FALSE	FALSE	FALSE	FALSE	FALSE
ENSDARG00000029818	TRUE	TRUE	FALSE	FALSE	TRUE
ENSDARG00000104115	FALSE	FALSE	FALSE	FALSE	FALSE
ENSDARG00000115251	FALSE	FALSE	FALSE	FALSE	FALSE
ENSDARG00000097128	FALSE	FALSE	FALSE	FALSE	FALSE
ENSDARG00000078941	FALSE	FALSE	FALSE	FALSE	FALSE
ENSDARG00000076238	FALSE	FALSE	FALSE	FALSE	TRUE
ENSDARG00000071868	FALSE	FALSE	FALSE	FALSE	FALSE
ENSDARG00000074899	FALSE	FALSE	FALSE	FALSE	FALSE
ENSDARG00000096739	FALSE	FALSE	FALSE	FALSE	FALSE
ENSDARG00000012244	FALSE	FALSE	FALSE	FALSE	FALSE
ENSDARG00000022280	TRUE	TRUE	FALSE	FALSE	FALSE
ENSDARG00000056979	FALSE	FALSE	FALSE	FALSE	FALSE
ENSDARG00000092354	FALSE	FALSE	FALSE	FALSE	FALSE
ENSDARG00000099807	FALSE	FALSE	TRUE	FALSE	FALSE
ENSDARG00000079716	FALSE	FALSE	FALSE	FALSE	FALSE
ENSDARG00000007406	FALSE	FALSE	FALSE	FALSE	FALSE
ENSDARG00000112295	FALSE	FALSE	FALSE	FALSE	FALSE
ENSDARG00000008310	FALSE	FALSE	FALSE	FALSE	FALSE
ENSDARG00000006422	FALSE	FALSE	FALSE	FALSE	FALSE
ENSDARG00000021124	FALSE	FALSE	FALSE	FALSE	FALSE
ENSDARG00000101766	FALSE	FALSE	FALSE	FALSE	FALSE
ENSDARG00000078835	FALSE	FALSE	FALSE	FALSE	FALSE
ENSDARG00000026338	FALSE	FALSE	FALSE	FALSE	FALSE
ENSDARG00000017986	FALSE	FALSE	FALSE	FALSE	FALSE
ENSDARG00000007941	FALSE	FALSE	TRUE	FALSE	FALSE
ENSDARG00000059812	FALSE	FALSE	FALSE	FALSE	FALSE
ENSDARG00000038500	FALSE	FALSE	FALSE	FALSE	FALSE
ENSDARG00000037633	FALSE	FALSE	FALSE	FALSE	TRUE
ENSDARG00000099919	FALSE	FALSE	FALSE	FALSE	FALSE
ENSDARG00000024877	FALSE	FALSE	FALSE	FALSE	FALSE
ENSDARG00000087927	FALSE	FALSE	FALSE	FALSE	TRUE
ENSDARG00000104490	FALSE	FALSE	FALSE	FALSE	FALSE
ENSDARG00000109591	FALSE	FALSE	FALSE	FALSE	FALSE
ENSDARG00000105046	FALSE	FALSE	FALSE	FALSE	FALSE
ENSDARG00000070119	FALSE	FALSE	FALSE	FALSE	FALSE
ENSDARG00000014091	FALSE	FALSE	TRUE	FALSE	TRUE
ENSDARG00000109974	FALSE	FALSE	FALSE	FALSE	FALSE
ENSDARG00000011188	FALSE	FALSE	FALSE	FALSE	FALSE
ENSDARG00000115248	FALSE	FALSE	FALSE	FALSE	FALSE
ENSDARG00000102896	FALSE	FALSE	FALSE	FALSE	FALSE
ENSDARG00000054025	FALSE	FALSE	FALSE	FALSE	FALSE
ENSDARG00000036471	FALSE	FALSE	FALSE	FALSE	FALSE
ENSDARG00000026090	FALSE	TRUE	FALSE	FALSE	TRUE
ENSDARG00000093405	FALSE	FALSE	FALSE	FALSE	FALSE
ENSDARG00000104457	FALSE	FALSE	FALSE	FALSE	FALSE
ENSDARG00000054208	FALSE	FALSE	FALSE	FALSE	TRUE
ENSDARG00000086309	FALSE	FALSE	FALSE	FALSE	FALSE
ENSDARG00000104925	FALSE	FALSE	FALSE	FALSE	FALSE
ENSDARG00000101790	FALSE	FALSE	FALSE	FALSE	FALSE
ENSDARG00000079872	FALSE	FALSE	FALSE	FALSE	FALSE
ENSDARG00000040076	FALSE	FALSE	FALSE	FALSE	FALSE
ENSDARG00000037411	FALSE	FALSE	TRUE	FALSE	FALSE
ENSDARG00000086756	FALSE	FALSE	FALSE	FALSE	FALSE
ENSDARG00000044718	FALSE	FALSE	FALSE	FALSE	FALSE
ENSDARG00000100349	FALSE	FALSE	FALSE	FALSE	FALSE
ENSDARG00000071341	FALSE	FALSE	FALSE	FALSE	FALSE
ENSDARG00000088331	FALSE	FALSE	FALSE	FALSE	FALSE
ENSDARG00000041299	TRUE	TRUE	FALSE	FALSE	TRUE
ENSDARG00000008807	FALSE	FALSE	FALSE	FALSE	FALSE
ENSDARG00000111749	FALSE	FALSE	FALSE	FALSE	FALSE
ENSDARG00000109296	FALSE	FALSE	FALSE	FALSE	FALSE
ENSDARG00000031774	FALSE	FALSE	FALSE	FALSE	FALSE
ENSDARG00000076609	FALSE	FALSE	FALSE	FALSE	FALSE
ENSDARG00000095651	FALSE	FALSE	TRUE	FALSE	FALSE
ENSDARG00000100181	FALSE	FALSE	FALSE	FALSE	FALSE
ENSDARG00000044339	FALSE	FALSE	FALSE	FALSE	FALSE
ENSDARG00000008049	TRUE	TRUE	FALSE	FALSE	TRUE
ENSDARG00000093129	TRUE	TRUE	TRUE	TRUE	FALSE
ENSDARG00000034409	FALSE	FALSE	FALSE	FALSE	FALSE
ENSDARG00000060005	FALSE	FALSE	TRUE	FALSE	FALSE
ENSDARG00000027777	FALSE	FALSE	FALSE	FALSE	FALSE
ENSDARG00000005574	FALSE	FALSE	TRUE	FALSE	FALSE
ENSDARG00000102731	FALSE	FALSE	FALSE	FALSE	FALSE
ENSDARG00000041619	FALSE	FALSE	FALSE	FALSE	TRUE
ENSDARG00000012144	FALSE	FALSE	FALSE	FALSE	FALSE
ENSDARG00000117589	FALSE	FALSE	FALSE	FALSE	FALSE
ENSDARG00000034138	TRUE	TRUE	TRUE	TRUE	TRUE
ENSDARG00000042151	FALSE	FALSE	TRUE	FALSE	TRUE
ENSDARG00000101197	FALSE	FALSE	FALSE	FALSE	FALSE
ENSDARG00000027689	FALSE	FALSE	FALSE	FALSE	FALSE
ENSDARG00000103846	FALSE	FALSE	FALSE	FALSE	FALSE
ENSDARG00000037838	FALSE	FALSE	FALSE	FALSE	TRUE
ENSDARG00000103915	FALSE	FALSE	FALSE	FALSE	FALSE
ENSDARG00000073883	FALSE	FALSE	FALSE	FALSE	FALSE
ENSDARG00000081583	FALSE	FALSE	FALSE	FALSE	FALSE
ENSDARG00000078094	FALSE	FALSE	FALSE	FALSE	FALSE
ENSDARG00000099761	FALSE	FALSE	TRUE	FALSE	FALSE
ENSDARG00000098103	FALSE	FALSE	FALSE	FALSE	FALSE
ENSDARG00000063412	FALSE	FALSE	FALSE	FALSE	FALSE
ENSDARG00000033382	FALSE	FALSE	TRUE	FALSE	FALSE
ENSDARG00000075723	FALSE	FALSE	FALSE	FALSE	FALSE
ENSDARG00000114861	FALSE	FALSE	FALSE	FALSE	FALSE
ENSDARG00000097933	FALSE	FALSE	FALSE	FALSE	FALSE
ENSDARG00000109652	FALSE	FALSE	FALSE	FALSE	FALSE
ENSDARG00000031775	FALSE	FALSE	FALSE	FALSE	FALSE
ENSDARG00000019231	FALSE	FALSE	FALSE	FALSE	FALSE
ENSDARG00000098386	FALSE	FALSE	TRUE	FALSE	FALSE
ENSDARG00000093577	FALSE	FALSE	FALSE	FALSE	FALSE
ENSDARG00000103709	FALSE	FALSE	FALSE	FALSE	FALSE
ENSDARG00000075201	FALSE	FALSE	FALSE	FALSE	FALSE
ENSDARG00000056783	FALSE	FALSE	FALSE	FALSE	FALSE
ENSDARG00000078593	FALSE	FALSE	TRUE	FALSE	FALSE
ENSDARG00000037639	FALSE	FALSE	FALSE	FALSE	FALSE
ENSDARG00000015891	FALSE	FALSE	FALSE	FALSE	FALSE
ENSDARG00000096929	FALSE	FALSE	TRUE	FALSE	FALSE
ENSDARG00000070050	FALSE	FALSE	FALSE	FALSE	FALSE
ENSDARG00000092290	FALSE	FALSE	FALSE	FALSE	FALSE
ENSDARG00000099021	FALSE	FALSE	FALSE	FALSE	FALSE
ENSDARG00000040553	FALSE	FALSE	FALSE	FALSE	FALSE
ENSDARG00000073688	FALSE	FALSE	FALSE	FALSE	FALSE
ENSDARG00000092632	FALSE	FALSE	TRUE	FALSE	FALSE
ENSDARG00000057481	FALSE	FALSE	FALSE	FALSE	FALSE
ENSDARG00000056950	FALSE	TRUE	FALSE	FALSE	TRUE
ENSDARG00000070360	TRUE	TRUE	FALSE	TRUE	TRUE
ENSDARG00000105338	FALSE	FALSE	TRUE	FALSE	FALSE
ENSDARG00000104985	FALSE	FALSE	FALSE	FALSE	FALSE
ENSDARG00000002241	FALSE	FALSE	FALSE	FALSE	TRUE
ENSDARG00000020504	TRUE	TRUE	FALSE	FALSE	TRUE
ENSDARG00000055502	FALSE	FALSE	FALSE	FALSE	FALSE
ENSDARG00000052114	FALSE	FALSE	FALSE	FALSE	FALSE
ENSDARG00000040971	FALSE	FALSE	FALSE	FALSE	FALSE
ENSDARG00000009194	FALSE	FALSE	FALSE	FALSE	FALSE
ENSDARG00000069249	FALSE	FALSE	FALSE	FALSE	FALSE
ENSDARG00000098717	FALSE	FALSE	FALSE	FALSE	FALSE
ENSDARG00000045166	FALSE	FALSE	FALSE	FALSE	FALSE
ENSDARG00000018228	FALSE	FALSE	TRUE	FALSE	FALSE
ENSDARG00000091320	FALSE	FALSE	FALSE	FALSE	FALSE
ENSDARG00000040277	FALSE	FALSE	FALSE	FALSE	TRUE
ENSDARG00000070682	FALSE	FALSE	FALSE	FALSE	FALSE
ENSDARG00000104038	FALSE	FALSE	FALSE	FALSE	FALSE
ENSDARG00000035913	FALSE	FALSE	FALSE	FALSE	FALSE
ENSDARG00000114311	FALSE	FALSE	FALSE	FALSE	FALSE
ENSDARG00000007277	FALSE	FALSE	FALSE	FALSE	FALSE
ENSDARG00000092870	FALSE	FALSE	FALSE	FALSE	FALSE
ENSDARG00000076766	TRUE	FALSE	FALSE	FALSE	FALSE
ENSDARG00000036051	FALSE	FALSE	FALSE	FALSE	FALSE
ENSDARG00000036499	FALSE	FALSE	FALSE	FALSE	FALSE
ENSDARG00000097186	FALSE	FALSE	FALSE	FALSE	FALSE
ENSDARG00000019304	FALSE	FALSE	FALSE	FALSE	FALSE
ENSDARG00000092633	FALSE	FALSE	FALSE	FALSE	FALSE
ENSDARG00000100531	FALSE	FALSE	FALSE	FALSE	FALSE
ENSDARG00000107282	FALSE	FALSE	FALSE	FALSE	FALSE
ENSDARG00000041359	FALSE	FALSE	FALSE	FALSE	TRUE
ENSDARG00000104278	FALSE	FALSE	FALSE	FALSE	FALSE
ENSDARG00000103510	FALSE	FALSE	FALSE	FALSE	FALSE
ENSDARG00000097868	FALSE	FALSE	TRUE	FALSE	FALSE
ENSDARG00000001999	FALSE	FALSE	FALSE	FALSE	TRUE
ENSDARG00000045444	TRUE	TRUE	TRUE	FALSE	FALSE
ENSDARG00000098443	FALSE	FALSE	FALSE	FALSE	FALSE
ENSDARG00000110315	FALSE	FALSE	FALSE	FALSE	FALSE
ENSDARG00000102379	FALSE	FALSE	TRUE	FALSE	FALSE
ENSDARG00000018257	FALSE	FALSE	FALSE	FALSE	FALSE
ENSDARG00000098591	FALSE	FALSE	FALSE	FALSE	FALSE
ENSDARG00000110028	FALSE	FALSE	FALSE	FALSE	FALSE
ENSDARG00000020893	TRUE	TRUE	FALSE	FALSE	FALSE
ENSDARG00000011870	FALSE	FALSE	FALSE	FALSE	FALSE
ENSDARG00000095829	FALSE	FALSE	FALSE	FALSE	FALSE
ENSDARG00000057000	FALSE	FALSE	FALSE	FALSE	FALSE
ENSDARG00000078057	FALSE	FALSE	FALSE	FALSE	FALSE
ENSDARG00000007099	TRUE	FALSE	TRUE	FALSE	FALSE
ENSDARG00000055538	FALSE	FALSE	FALSE	FALSE	FALSE
ENSDARG00000063570	FALSE	FALSE	FALSE	FALSE	FALSE
ENSDARG00000061647	FALSE	FALSE	FALSE	FALSE	FALSE
ENSDARG00000039093	FALSE	FALSE	FALSE	FALSE	FALSE
ENSDARG00000060846	FALSE	FALSE	FALSE	FALSE	FALSE
ENSDARG00000056012	FALSE	FALSE	TRUE	FALSE	TRUE
ENSDARG00000024560	FALSE	FALSE	FALSE	FALSE	FALSE
ENSDARG00000117395	FALSE	FALSE	FALSE	FALSE	FALSE
ENSDARG00000097166	FALSE	FALSE	FALSE	FALSE	FALSE
ENSDARG00000020289	FALSE	FALSE	FALSE	FALSE	FALSE
ENSDARG00000011000	FALSE	FALSE	FALSE	FALSE	FALSE
ENSDARG00000052351	FALSE	FALSE	FALSE	FALSE	FALSE
ENSDARG00000078522	FALSE	FALSE	FALSE	FALSE	FALSE
ENSDARG00000101935	FALSE	FALSE	FALSE	FALSE	FALSE
ENSDARG00000115035	FALSE	FALSE	FALSE	FALSE	FALSE
ENSDARG00000008434	FALSE	FALSE	FALSE	FALSE	FALSE
ENSDARG00000008026	FALSE	FALSE	FALSE	FALSE	FALSE
ENSDARG00000070337	FALSE	FALSE	FALSE	FALSE	FALSE
ENSDARG00000044625	TRUE	TRUE	FALSE	FALSE	TRUE
ENSDARG00000098894	FALSE	FALSE	TRUE	FALSE	FALSE
ENSDARG00000035909	FALSE	FALSE	FALSE	FALSE	FALSE
ENSDARG00000099117	FALSE	FALSE	FALSE	FALSE	FALSE
ENSDARG00000089042	FALSE	TRUE	TRUE	FALSE	FALSE
ENSDARG00000109380	FALSE	FALSE	FALSE	FALSE	FALSE
ENSDARG00000035571	FALSE	FALSE	FALSE	FALSE	FALSE
ENSDARG00000052910	FALSE	FALSE	FALSE	TRUE	TRUE
ENSDARG00000102883	FALSE	FALSE	FALSE	FALSE	FALSE
ENSDARG00000070598	FALSE	FALSE	FALSE	FALSE	FALSE
ENSDARG00000094225	FALSE	FALSE	FALSE	FALSE	FALSE
ENSDARG00000102778	FALSE	FALSE	TRUE	FALSE	FALSE
ENSDARG00000071005	FALSE	TRUE	FALSE	FALSE	TRUE
ENSDARG00000039650	FALSE	FALSE	FALSE	FALSE	TRUE
ENSDARG00000025615	FALSE	FALSE	FALSE	FALSE	FALSE
ENSDARG00000070723	FALSE	FALSE	FALSE	FALSE	FALSE
ENSDARG00000076895	FALSE	FALSE	TRUE	FALSE	TRUE
ENSDARG00000063563	FALSE	FALSE	FALSE	FALSE	FALSE
ENSDARG00000104501	FALSE	FALSE	FALSE	FALSE	FALSE
ENSDARG00000101593	FALSE	FALSE	FALSE	FALSE	FALSE
ENSDARG00000056008	FALSE	FALSE	FALSE	FALSE	FALSE
ENSDARG00000085894	FALSE	FALSE	TRUE	FALSE	FALSE
ENSDARG00000042341	FALSE	FALSE	FALSE	FALSE	FALSE
ENSDARG00000096603	FALSE	FALSE	FALSE	FALSE	FALSE
ENSDARG00000070824	FALSE	FALSE	FALSE	FALSE	FALSE
ENSDARG00000036254	FALSE	FALSE	FALSE	FALSE	FALSE
ENSDARG00000103996	FALSE	FALSE	FALSE	FALSE	FALSE
ENSDARG00000055493	FALSE	FALSE	FALSE	FALSE	TRUE
ENSDARG00000102435	FALSE	FALSE	FALSE	FALSE	FALSE
ENSDARG00000083583	FALSE	FALSE	FALSE	FALSE	FALSE
ENSDARG00000109726	FALSE	FALSE	FALSE	FALSE	FALSE
ENSDARG00000063525	FALSE	FALSE	FALSE	FALSE	FALSE
ENSDARG00000003411	FALSE	FALSE	FALSE	FALSE	FALSE
ENSDARG00000105601	FALSE	FALSE	TRUE	FALSE	FALSE
ENSDARG00000117418	FALSE	FALSE	FALSE	FALSE	FALSE
ENSDARG00000101814	FALSE	FALSE	FALSE	FALSE	FALSE
ENSDARG00000060638	FALSE	FALSE	FALSE	FALSE	FALSE
ENSDARG00000094214	FALSE	FALSE	FALSE	FALSE	FALSE
ENSDARG00000040955	TRUE	TRUE	TRUE	FALSE	FALSE
ENSDARG00000031100	FALSE	FALSE	FALSE	FALSE	FALSE
ENSDARG00000103283	FALSE	FALSE	FALSE	FALSE	FALSE
ENSDARG00000067920	FALSE	FALSE	FALSE	FALSE	FALSE
ENSDARG00000035630	FALSE	FALSE	FALSE	FALSE	FALSE
ENSDARG00000019302	FALSE	FALSE	FALSE	FALSE	TRUE
ENSDARG00000055647	FALSE	TRUE	FALSE	TRUE	TRUE
ENSDARG00000104860	FALSE	FALSE	FALSE	FALSE	FALSE
ENSDARG00000061791	FALSE	FALSE	FALSE	FALSE	FALSE
ENSDARG00000030972	FALSE	FALSE	FALSE	FALSE	FALSE
ENSDARG00000068021	FALSE	TRUE	FALSE	TRUE	FALSE
ENSDARG00000018650	FALSE	FALSE	FALSE	FALSE	FALSE
ENSDARG00000104361	FALSE	FALSE	TRUE	FALSE	FALSE
ENSDARG00000071418	FALSE	FALSE	FALSE	FALSE	TRUE
ENSDARG00000059972	FALSE	FALSE	FALSE	FALSE	FALSE
ENSDARG00000093615	FALSE	FALSE	FALSE	FALSE	FALSE
ENSDARG00000096417	FALSE	FALSE	TRUE	FALSE	FALSE
ENSDARG00000083266	FALSE	FALSE	FALSE	FALSE	FALSE
ENSDARG00000002571	FALSE	FALSE	FALSE	FALSE	FALSE
ENSDARG00000000588	FALSE	FALSE	FALSE	FALSE	FALSE
ENSDARG00000077726	FALSE	TRUE	FALSE	FALSE	TRUE
ENSDARG00000061737	FALSE	FALSE	TRUE	FALSE	FALSE
ENSDARG00000079939	FALSE	FALSE	FALSE	FALSE	FALSE
ENSDARG00000041609	FALSE	FALSE	TRUE	FALSE	FALSE
ENSDARG00000109841	FALSE	FALSE	FALSE	FALSE	FALSE
ENSDARG00000057652	FALSE	FALSE	FALSE	FALSE	FALSE
ENSDARG00000117001	FALSE	FALSE	FALSE	FALSE	FALSE
ENSDARG00000078888	FALSE	FALSE	FALSE	FALSE	TRUE
ENSDARG00000062053	FALSE	FALSE	FALSE	FALSE	FALSE
ENSDARG00000001549	FALSE	FALSE	FALSE	FALSE	TRUE
ENSDARG00000115739	FALSE	FALSE	FALSE	FALSE	FALSE
ENSDARG00000097776	FALSE	FALSE	FALSE	FALSE	FALSE
ENSDARG00000007774	FALSE	FALSE	FALSE	FALSE	TRUE
ENSDARG00000092970	FALSE	FALSE	FALSE	FALSE	FALSE
ENSDARG00000075033	FALSE	FALSE	FALSE	FALSE	FALSE
ENSDARG00000113279	FALSE	FALSE	FALSE	FALSE	FALSE
ENSDARG00000040607	FALSE	FALSE	FALSE	FALSE	FALSE
ENSDARG00000018566	FALSE	FALSE	FALSE	FALSE	FALSE
ENSDARG00000117705	FALSE	FALSE	TRUE	FALSE	FALSE
ENSDARG00000100588	FALSE	FALSE	FALSE	FALSE	FALSE
ENSDARG00000101009	FALSE	FALSE	TRUE	FALSE	FALSE
ENSDARG00000103306	FALSE	FALSE	FALSE	FALSE	FALSE
ENSDARG00000043509	FALSE	FALSE	TRUE	FALSE	TRUE
ENSDARG00000073872	FALSE	FALSE	FALSE	FALSE	FALSE
ENSDARG00000055679	FALSE	FALSE	FALSE	FALSE	FALSE
ENSDARG00000101569	FALSE	FALSE	FALSE	FALSE	FALSE
ENSDARG00000015515	FALSE	FALSE	FALSE	FALSE	FALSE
ENSDARG00000060847	FALSE	FALSE	FALSE	FALSE	FALSE
ENSDARG00000067605	FALSE	FALSE	FALSE	FALSE	FALSE
ENSDARG00000012932	FALSE	FALSE	FALSE	FALSE	FALSE
ENSDARG00000030905	TRUE	TRUE	TRUE	TRUE	FALSE
ENSDARG00000097065	FALSE	FALSE	FALSE	FALSE	FALSE
ENSDARG00000103589	FALSE	FALSE	FALSE	FALSE	FALSE
ENSDARG00000086881	FALSE	FALSE	FALSE	FALSE	FALSE
ENSDARG00000114133	FALSE	FALSE	FALSE	FALSE	FALSE
ENSDARG00000098231	FALSE	FALSE	TRUE	FALSE	FALSE
ENSDARG00000030326	FALSE	FALSE	TRUE	FALSE	TRUE
ENSDARG00000026489	FALSE	FALSE	FALSE	FALSE	TRUE
ENSDARG00000096970	FALSE	FALSE	FALSE	FALSE	FALSE
ENSDARG00000068576	FALSE	FALSE	FALSE	FALSE	FALSE
ENSDARG00000026294	FALSE	FALSE	FALSE	FALSE	TRUE
ENSDARG00000018693	FALSE	TRUE	FALSE	FALSE	FALSE
ENSDARG00000008153	FALSE	FALSE	FALSE	FALSE	TRUE
ENSDARG00000102321	FALSE	FALSE	FALSE	FALSE	FALSE
ENSDARG00000096154	FALSE	FALSE	FALSE	FALSE	FALSE
ENSDARG00000097871	FALSE	FALSE	FALSE	FALSE	FALSE
ENSDARG00000004160	FALSE	FALSE	FALSE	FALSE	FALSE
ENSDARG00000026842	FALSE	TRUE	TRUE	TRUE	TRUE
ENSDARG00000092892	FALSE	FALSE	FALSE	FALSE	FALSE
ENSDARG00000041493	FALSE	FALSE	FALSE	TRUE	FALSE
ENSDARG00000012788	FALSE	TRUE	TRUE	TRUE	TRUE
ENSDARG00000093463	FALSE	FALSE	FALSE	FALSE	FALSE
ENSDARG00000061450	FALSE	FALSE	FALSE	FALSE	FALSE
ENSDARG00000116592	FALSE	FALSE	FALSE	FALSE	FALSE
ENSDARG00000060980	FALSE	FALSE	FALSE	TRUE	FALSE
ENSDARG00000113472	FALSE	FALSE	FALSE	FALSE	FALSE
ENSDARG00000099725	FALSE	FALSE	FALSE	FALSE	FALSE
ENSDARG00000021702	FALSE	FALSE	FALSE	FALSE	FALSE
ENSDARG00000036501	FALSE	FALSE	FALSE	FALSE	FALSE
ENSDARG00000097060	FALSE	FALSE	FALSE	FALSE	FALSE
ENSDARG00000110957	FALSE	FALSE	FALSE	FALSE	FALSE
ENSDARG00000058597	FALSE	FALSE	FALSE	FALSE	TRUE
ENSDARG00000071086	FALSE	FALSE	FALSE	FALSE	FALSE
ENSDARG00000002463	FALSE	FALSE	TRUE	FALSE	FALSE
ENSDARG00000037997	FALSE	FALSE	FALSE	FALSE	FALSE
ENSDARG00000028335	TRUE	TRUE	TRUE	FALSE	TRUE
ENSDARG00000018260	TRUE	FALSE	FALSE	TRUE	TRUE
ENSDARG00000021110	FALSE	FALSE	FALSE	FALSE	FALSE
ENSDARG00000093865	FALSE	TRUE	FALSE	FALSE	TRUE
ENSDARG00000016868	FALSE	FALSE	FALSE	FALSE	FALSE
ENSDARG00000094304	FALSE	FALSE	FALSE	FALSE	FALSE
ENSDARG00000040033	FALSE	FALSE	FALSE	FALSE	TRUE
ENSDARG00000098841	FALSE	FALSE	FALSE	FALSE	FALSE
ENSDARG00000113299	FALSE	FALSE	FALSE	FALSE	FALSE
ENSDARG00000020891	FALSE	FALSE	FALSE	FALSE	FALSE
ENSDARG00000017354	FALSE	FALSE	FALSE	FALSE	TRUE
ENSDARG00000016260	FALSE	FALSE	FALSE	FALSE	FALSE
ENSDARG00000113307	FALSE	FALSE	FALSE	FALSE	FALSE
ENSDARG00000041294	FALSE	FALSE	FALSE	FALSE	FALSE
ENSDARG00000016022	FALSE	FALSE	TRUE	FALSE	FALSE
ENSDARG00000005593	FALSE	FALSE	FALSE	FALSE	FALSE
ENSDARG00000113674	FALSE	FALSE	FALSE	FALSE	FALSE
ENSDARG00000090427	FALSE	FALSE	FALSE	FALSE	FALSE
ENSDARG00000019791	FALSE	FALSE	FALSE	FALSE	FALSE
ENSDARG00000096214	FALSE	FALSE	FALSE	FALSE	FALSE
ENSDARG00000071004	FALSE	FALSE	FALSE	FALSE	FALSE
ENSDARG00000038059	FALSE	FALSE	FALSE	FALSE	TRUE
ENSDARG00000016981	FALSE	FALSE	FALSE	FALSE	TRUE
ENSDARG00000113618	FALSE	FALSE	FALSE	FALSE	FALSE
ENSDARG00000054036	FALSE	FALSE	FALSE	FALSE	FALSE
ENSDARG00000052388	FALSE	FALSE	FALSE	FALSE	FALSE
ENSDARG00000111541	FALSE	FALSE	FALSE	FALSE	FALSE
ENSDARG00000070573	FALSE	FALSE	FALSE	FALSE	TRUE
ENSDARG00000088087	FALSE	FALSE	FALSE	FALSE	FALSE
ENSDARG00000117535	FALSE	FALSE	FALSE	FALSE	FALSE
ENSDARG00000005026	FALSE	FALSE	TRUE	FALSE	TRUE
ENSDARG00000095905	FALSE	FALSE	FALSE	FALSE	FALSE
ENSDARG00000020164	FALSE	FALSE	FALSE	FALSE	TRUE
ENSDARG00000018491	FALSE	FALSE	FALSE	FALSE	FALSE
ENSDARG00000058284	FALSE	FALSE	FALSE	FALSE	FALSE
ENSDARG00000070419	FALSE	FALSE	FALSE	FALSE	FALSE
ENSDARG00000079378	FALSE	FALSE	TRUE	FALSE	TRUE
ENSDARG00000058917	TRUE	TRUE	FALSE	TRUE	TRUE
ENSDARG00000017687	FALSE	FALSE	FALSE	FALSE	FALSE
ENSDARG00000102141	FALSE	FALSE	FALSE	FALSE	FALSE
ENSDARG00000096506	FALSE	FALSE	FALSE	FALSE	FALSE
ENSDARG00000098593	FALSE	FALSE	FALSE	FALSE	FALSE
ENSDARG00000078986	TRUE	TRUE	FALSE	FALSE	TRUE
ENSDARG00000067601	FALSE	FALSE	FALSE	FALSE	FALSE
ENSDARG00000112802	FALSE	FALSE	FALSE	FALSE	FALSE
ENSDARG00000074378	FALSE	FALSE	FALSE	FALSE	FALSE
ENSDARG00000015554	FALSE	FALSE	TRUE	TRUE	TRUE
ENSDARG00000055690	FALSE	FALSE	FALSE	FALSE	FALSE
ENSDARG00000063049	FALSE	FALSE	TRUE	FALSE	FALSE
ENSDARG00000027744	TRUE	TRUE	FALSE	FALSE	FALSE
ENSDARG00000111400	FALSE	FALSE	FALSE	FALSE	FALSE
ENSDARG00000015805	FALSE	TRUE	FALSE	FALSE	FALSE
ENSDARG00000040009	FALSE	FALSE	FALSE	FALSE	FALSE
ENSDARG00000010318	FALSE	FALSE	FALSE	FALSE	FALSE
ENSDARG00000062152	FALSE	FALSE	FALSE	FALSE	FALSE
ENSDARG00000038910	FALSE	FALSE	FALSE	FALSE	FALSE
ENSDARG00000058039	FALSE	FALSE	FALSE	FALSE	FALSE
ENSDARG00000113362	FALSE	FALSE	FALSE	FALSE	FALSE
ENSDARG00000076998	FALSE	FALSE	FALSE	FALSE	FALSE
ENSDARG00000042552	FALSE	FALSE	FALSE	FALSE	FALSE
ENSDARG00000105000	FALSE	FALSE	FALSE	FALSE	FALSE
ENSDARG00000105305	FALSE	FALSE	FALSE	FALSE	FALSE
ENSDARG00000088984	FALSE	FALSE	FALSE	FALSE	FALSE
ENSDARG00000057890	FALSE	FALSE	FALSE	TRUE	TRUE
ENSDARG00000063149	FALSE	FALSE	FALSE	FALSE	FALSE
ENSDARG00000023916	FALSE	FALSE	FALSE	FALSE	FALSE
ENSDARG00000115262	FALSE	FALSE	FALSE	FALSE	FALSE
ENSDARG00000115277	FALSE	FALSE	FALSE	FALSE	FALSE
ENSDARG00000040266	TRUE	FALSE	FALSE	FALSE	FALSE
ENSDARG00000038894	FALSE	FALSE	FALSE	FALSE	FALSE
ENSDARG00000097791	FALSE	FALSE	FALSE	FALSE	FALSE
ENSDARG00000032161	FALSE	FALSE	FALSE	FALSE	FALSE
ENSDARG00000076495	FALSE	FALSE	FALSE	FALSE	FALSE
ENSDARG00000078733	FALSE	FALSE	FALSE	FALSE	FALSE
ENSDARG00000111403	FALSE	FALSE	FALSE	FALSE	FALSE
ENSDARG00000012519	FALSE	FALSE	FALSE	FALSE	FALSE
ENSDARG00000014554	FALSE	FALSE	FALSE	FALSE	TRUE
ENSDARG00000096295	FALSE	FALSE	FALSE	FALSE	FALSE
ENSDARG00000110605	FALSE	FALSE	FALSE	FALSE	FALSE
ENSDARG00000092659	FALSE	FALSE	FALSE	FALSE	FALSE
ENSDARG00000057531	FALSE	FALSE	FALSE	FALSE	FALSE
ENSDARG00000021455	FALSE	FALSE	FALSE	FALSE	FALSE
ENSDARG00000061204	FALSE	FALSE	FALSE	FALSE	FALSE
ENSDARG00000038141	FALSE	TRUE	FALSE	FALSE	TRUE
ENSDARG00000045927	FALSE	FALSE	FALSE	FALSE	FALSE
ENSDARG00000090981	FALSE	FALSE	TRUE	FALSE	FALSE
ENSDARG00000061773	FALSE	TRUE	FALSE	FALSE	TRUE
ENSDARG00000069013	FALSE	FALSE	FALSE	FALSE	FALSE
ENSDARG00000096849	FALSE	FALSE	FALSE	FALSE	FALSE
ENSDARG00000115615	FALSE	FALSE	FALSE	FALSE	FALSE
ENSDARG00000070603	FALSE	FALSE	FALSE	FALSE	TRUE
ENSDARG00000102216	FALSE	FALSE	FALSE	FALSE	FALSE
ENSDARG00000042864	FALSE	FALSE	FALSE	FALSE	TRUE
ENSDARG00000040039	FALSE	FALSE	FALSE	FALSE	FALSE
ENSDARG00000039970	FALSE	FALSE	FALSE	FALSE	FALSE
ENSDARG00000009610	FALSE	FALSE	FALSE	FALSE	FALSE
ENSDARG00000008835	FALSE	FALSE	FALSE	FALSE	FALSE
ENSDARG00000110183	FALSE	FALSE	FALSE	FALSE	FALSE
ENSDARG00000086732	FALSE	FALSE	FALSE	FALSE	FALSE
ENSDARG00000056995	TRUE	TRUE	TRUE	TRUE	TRUE
ENSDARG00000012818	FALSE	FALSE	FALSE	FALSE	FALSE
ENSDARG00000094105	FALSE	FALSE	TRUE	FALSE	FALSE
ENSDARG00000089260	FALSE	FALSE	FALSE	FALSE	TRUE
ENSDARG00000086790	FALSE	FALSE	FALSE	FALSE	FALSE
ENSDARG00000103940	FALSE	FALSE	FALSE	FALSE	FALSE
ENSDARG00000094135	FALSE	FALSE	FALSE	FALSE	FALSE
ENSDARG00000037145	FALSE	FALSE	FALSE	FALSE	FALSE
ENSDARG00000100591	FALSE	FALSE	FALSE	FALSE	FALSE
ENSDARG00000099516	FALSE	FALSE	FALSE	FALSE	FALSE
ENSDARG00000044562	FALSE	FALSE	FALSE	FALSE	TRUE
ENSDARG00000010531	FALSE	FALSE	FALSE	FALSE	FALSE
ENSDARG00000043271	FALSE	FALSE	TRUE	TRUE	TRUE
ENSDARG00000063014	FALSE	FALSE	FALSE	FALSE	FALSE
ENSDARG00000078285	FALSE	FALSE	FALSE	FALSE	FALSE
ENSDARG00000080372	FALSE	FALSE	FALSE	FALSE	FALSE
ENSDARG00000096679	FALSE	FALSE	FALSE	FALSE	FALSE
ENSDARG00000051902	FALSE	FALSE	FALSE	FALSE	TRUE
ENSDARG00000010572	FALSE	FALSE	FALSE	FALSE	FALSE
ENSDARG00000102371	FALSE	FALSE	FALSE	FALSE	FALSE
ENSDARG00000006604	FALSE	FALSE	FALSE	FALSE	FALSE
ENSDARG00000099247	FALSE	FALSE	FALSE	FALSE	FALSE
ENSDARG00000017078	FALSE	FALSE	FALSE	FALSE	TRUE
ENSDARG00000100019	FALSE	FALSE	FALSE	FALSE	FALSE
ENSDARG00000098946	FALSE	FALSE	TRUE	FALSE	FALSE
ENSDARG00000026225	FALSE	FALSE	FALSE	FALSE	FALSE
ENSDARG00000036698	FALSE	FALSE	FALSE	FALSE	FALSE
ENSDARG00000077236	FALSE	FALSE	FALSE	FALSE	FALSE
ENSDARG00000041586	FALSE	FALSE	FALSE	FALSE	FALSE
ENSDARG00000037116	FALSE	FALSE	TRUE	FALSE	TRUE
ENSDARG00000019728	FALSE	FALSE	FALSE	FALSE	TRUE
ENSDARG00000103038	FALSE	FALSE	FALSE	FALSE	FALSE
ENSDARG00000095264	FALSE	FALSE	FALSE	FALSE	FALSE
ENSDARG00000078152	FALSE	FALSE	FALSE	FALSE	FALSE
ENSDARG00000093535	FALSE	FALSE	FALSE	FALSE	FALSE
ENSDARG00000011273	FALSE	FALSE	FALSE	FALSE	FALSE
ENSDARG00000097895	FALSE	FALSE	FALSE	FALSE	FALSE
ENSDARG00000096594	FALSE	FALSE	FALSE	FALSE	FALSE
ENSDARG00000015010	FALSE	FALSE	FALSE	FALSE	FALSE
ENSDARG00000017798	FALSE	FALSE	TRUE	FALSE	FALSE
ENSDARG00000077722	FALSE	FALSE	FALSE	FALSE	FALSE
ENSDARG00000036090	FALSE	FALSE	FALSE	FALSE	FALSE
ENSDARG00000088898	FALSE	FALSE	FALSE	FALSE	FALSE
ENSDARG00000006603	FALSE	FALSE	FALSE	FALSE	FALSE
ENSDARG00000055753	FALSE	FALSE	FALSE	FALSE	TRUE
ENSDARG00000115201	FALSE	FALSE	FALSE	FALSE	FALSE
ENSDARG00000069981	FALSE	FALSE	FALSE	FALSE	FALSE
ENSDARG00000031222	FALSE	FALSE	FALSE	FALSE	FALSE
ENSDARG00000075252	FALSE	FALSE	FALSE	FALSE	FALSE
ENSDARG00000063438	FALSE	FALSE	FALSE	FALSE	FALSE
ENSDARG00000013236	FALSE	FALSE	FALSE	FALSE	FALSE
ENSDARG00000051819	FALSE	FALSE	FALSE	FALSE	FALSE
ENSDARG00000101139	FALSE	FALSE	FALSE	FALSE	FALSE
ENSDARG00000015546	FALSE	FALSE	TRUE	FALSE	TRUE
ENSDARG00000037484	FALSE	FALSE	TRUE	FALSE	FALSE
ENSDARG00000094419	FALSE	FALSE	TRUE	FALSE	FALSE
ENSDARG00000037245	FALSE	FALSE	FALSE	FALSE	FALSE
ENSDARG00000070705	TRUE	TRUE	FALSE	TRUE	TRUE
ENSDARG00000042539	FALSE	FALSE	FALSE	FALSE	FALSE
ENSDARG00000029688	FALSE	FALSE	FALSE	FALSE	FALSE
ENSDARG00000081488	FALSE	FALSE	FALSE	FALSE	FALSE
ENSDARG00000083336	FALSE	FALSE	FALSE	FALSE	FALSE
ENSDARG00000094160	TRUE	FALSE	FALSE	TRUE	TRUE
ENSDARG00000002790	FALSE	FALSE	FALSE	FALSE	FALSE
ENSDARG00000037064	FALSE	FALSE	FALSE	FALSE	FALSE
ENSDARG00000096718	FALSE	FALSE	FALSE	FALSE	FALSE
ENSDARG00000115532	FALSE	FALSE	FALSE	FALSE	FALSE
ENSDARG00000024759	FALSE	FALSE	FALSE	FALSE	FALSE
ENSDARG00000018524	FALSE	TRUE	FALSE	FALSE	FALSE
ENSDARG00000107261	FALSE	FALSE	FALSE	FALSE	FALSE
ENSDARG00000055554	FALSE	FALSE	FALSE	FALSE	FALSE
ENSDARG00000097238	FALSE	FALSE	FALSE	FALSE	FALSE
ENSDARG00000040584	FALSE	FALSE	FALSE	FALSE	FALSE
ENSDARG00000095917	FALSE	FALSE	FALSE	FALSE	FALSE
ENSDARG00000057936	FALSE	FALSE	FALSE	FALSE	TRUE
ENSDARG00000110133	FALSE	FALSE	FALSE	FALSE	FALSE
ENSDARG00000083434	FALSE	FALSE	TRUE	FALSE	FALSE
ENSDARG00000101936	FALSE	FALSE	FALSE	FALSE	FALSE
ENSDARG00000104491	FALSE	FALSE	FALSE	FALSE	FALSE
ENSDARG00000114100	FALSE	FALSE	FALSE	FALSE	FALSE
ENSDARG00000086840	FALSE	FALSE	FALSE	FALSE	FALSE
ENSDARG00000069494	FALSE	FALSE	FALSE	FALSE	FALSE
ENSDARG00000104681	FALSE	FALSE	FALSE	FALSE	FALSE
ENSDARG00000021389	FALSE	FALSE	FALSE	FALSE	FALSE
ENSDARG00000095697	FALSE	FALSE	FALSE	FALSE	FALSE
ENSDARG00000063726	FALSE	FALSE	FALSE	FALSE	FALSE
ENSDARG00000040725	TRUE	TRUE	TRUE	FALSE	FALSE
ENSDARG00000089724	FALSE	FALSE	FALSE	FALSE	FALSE
ENSDARG00000024017	FALSE	FALSE	FALSE	FALSE	FALSE
ENSDARG00000011487	FALSE	FALSE	FALSE	FALSE	FALSE
ENSDARG00000053383	FALSE	FALSE	FALSE	FALSE	FALSE
ENSDARG00000055412	FALSE	FALSE	FALSE	FALSE	FALSE
ENSDARG00000017762	FALSE	FALSE	FALSE	FALSE	TRUE
ENSDARG00000062646	FALSE	FALSE	FALSE	FALSE	FALSE
ENSDARG00000091062	TRUE	TRUE	FALSE	TRUE	FALSE
ENSDARG00000075248	FALSE	FALSE	FALSE	FALSE	FALSE
ENSDARG00000110053	FALSE	FALSE	FALSE	FALSE	FALSE
ENSDARG00000092394	FALSE	FALSE	TRUE	FALSE	FALSE
ENSDARG00000027738	FALSE	FALSE	FALSE	FALSE	FALSE
ENSDARG00000057419	FALSE	FALSE	FALSE	FALSE	FALSE
ENSDARG00000070898	FALSE	TRUE	FALSE	FALSE	TRUE
ENSDARG00000010721	FALSE	FALSE	FALSE	FALSE	FALSE
ENSDARG00000040925	FALSE	FALSE	FALSE	FALSE	FALSE
ENSDARG00000099679	FALSE	FALSE	FALSE	FALSE	FALSE
ENSDARG00000060596	FALSE	FALSE	FALSE	FALSE	TRUE
ENSDARG00000100375	FALSE	FALSE	FALSE	FALSE	FALSE
ENSDARG00000099284	FALSE	FALSE	FALSE	FALSE	FALSE
ENSDARG00000043901	FALSE	FALSE	FALSE	FALSE	FALSE
ENSDARG00000104936	FALSE	FALSE	FALSE	FALSE	FALSE
ENSDARG00000063076	FALSE	FALSE	FALSE	FALSE	FALSE
ENSDARG00000013946	FALSE	FALSE	FALSE	FALSE	TRUE
ENSDARG00000021973	FALSE	FALSE	TRUE	FALSE	TRUE
ENSDARG00000062632	FALSE	FALSE	FALSE	FALSE	TRUE
ENSDARG00000116118	FALSE	FALSE	FALSE	FALSE	FALSE
ENSDARG00000099079	FALSE	FALSE	FALSE	FALSE	FALSE
ENSDARG00000097011	FALSE	FALSE	FALSE	FALSE	FALSE
ENSDARG00000010770	TRUE	TRUE	FALSE	FALSE	TRUE
ENSDARG00000090912	FALSE	FALSE	FALSE	FALSE	TRUE
ENSDARG00000078760	FALSE	FALSE	FALSE	FALSE	FALSE
ENSDARG00000075014	FALSE	FALSE	FALSE	FALSE	FALSE
ENSDARG00000052104	FALSE	FALSE	FALSE	FALSE	FALSE
ENSDARG00000062148	FALSE	FALSE	FALSE	FALSE	FALSE
ENSDARG00000077467	FALSE	FALSE	FALSE	FALSE	FALSE
ENSDARG00000062801	FALSE	FALSE	FALSE	FALSE	FALSE
ENSDARG00000019487	FALSE	FALSE	FALSE	FALSE	FALSE
ENSDARG00000079552	FALSE	FALSE	FALSE	FALSE	TRUE
ENSDARG00000104388	FALSE	FALSE	FALSE	FALSE	FALSE
ENSDARG00000011222	FALSE	FALSE	FALSE	FALSE	FALSE
ENSDARG00000034423	FALSE	FALSE	FALSE	FALSE	FALSE
ENSDARG00000097098	FALSE	FALSE	FALSE	FALSE	FALSE
ENSDARG00000114779	FALSE	FALSE	FALSE	FALSE	FALSE
ENSDARG00000093205	FALSE	FALSE	FALSE	FALSE	FALSE
ENSDARG00000091757	FALSE	FALSE	FALSE	FALSE	FALSE
ENSDARG00000114031	FALSE	FALSE	FALSE	FALSE	FALSE
ENSDARG00000077177	FALSE	TRUE	FALSE	FALSE	FALSE
ENSDARG00000008796	TRUE	TRUE	TRUE	TRUE	TRUE
ENSDARG00000081126	FALSE	TRUE	FALSE	FALSE	FALSE
ENSDARG00000030155	FALSE	FALSE	FALSE	FALSE	TRUE
ENSDARG00000056642	FALSE	FALSE	FALSE	FALSE	FALSE
ENSDARG00000069529	FALSE	FALSE	FALSE	FALSE	FALSE
ENSDARG00000041358	FALSE	FALSE	FALSE	FALSE	FALSE
ENSDARG00000056427	FALSE	FALSE	TRUE	FALSE	FALSE
ENSDARG00000004105	FALSE	FALSE	FALSE	FALSE	FALSE
ENSDARG00000020777	FALSE	FALSE	FALSE	FALSE	FALSE
ENSDARG00000055770	FALSE	FALSE	FALSE	FALSE	FALSE
ENSDARG00000044774	TRUE	FALSE	FALSE	TRUE	TRUE
ENSDARG00000093303	FALSE	FALSE	FALSE	FALSE	FALSE
ENSDARG00000076748	FALSE	FALSE	FALSE	FALSE	TRUE
ENSDARG00000051783	FALSE	FALSE	FALSE	FALSE	TRUE
ENSDARG00000093565	FALSE	FALSE	FALSE	FALSE	FALSE
ENSDARG00000098178	FALSE	FALSE	FALSE	FALSE	FALSE
ENSDARG00000029072	FALSE	FALSE	FALSE	FALSE	FALSE
ENSDARG00000017982	FALSE	FALSE	FALSE	FALSE	FALSE
ENSDARG00000095800	FALSE	FALSE	FALSE	FALSE	FALSE
ENSDARG00000101759	FALSE	FALSE	FALSE	FALSE	FALSE
ENSDARG00000069329	FALSE	FALSE	FALSE	FALSE	FALSE
ENSDARG00000080038	FALSE	FALSE	FALSE	FALSE	FALSE
ENSDARG00000061413	FALSE	FALSE	FALSE	FALSE	FALSE
ENSDARG00000035147	FALSE	TRUE	FALSE	TRUE	TRUE
ENSDARG00000117336	FALSE	FALSE	FALSE	FALSE	FALSE
ENSDARG00000104035	FALSE	FALSE	FALSE	FALSE	FALSE
ENSDARG00000017423	FALSE	FALSE	FALSE	FALSE	FALSE
ENSDARG00000076264	TRUE	TRUE	FALSE	TRUE	TRUE
ENSDARG00000068822	FALSE	FALSE	FALSE	FALSE	FALSE
ENSDARG00000074270	FALSE	FALSE	FALSE	FALSE	FALSE
ENSDARG00000016363	FALSE	FALSE	FALSE	FALSE	TRUE
ENSDARG00000053987	FALSE	FALSE	FALSE	FALSE	TRUE
ENSDARG00000039062	FALSE	FALSE	FALSE	FALSE	FALSE
ENSDARG00000056793	FALSE	FALSE	FALSE	FALSE	FALSE
ENSDARG00000021201	TRUE	TRUE	TRUE	FALSE	FALSE
ENSDARG00000055831	TRUE	TRUE	FALSE	FALSE	FALSE
ENSDARG00000073935	FALSE	FALSE	FALSE	FALSE	FALSE
ENSDARG00000021987	FALSE	FALSE	FALSE	FALSE	FALSE
ENSDARG00000015524	FALSE	FALSE	FALSE	FALSE	FALSE
ENSDARG00000105311	FALSE	FALSE	FALSE	FALSE	FALSE
ENSDARG00000038068	TRUE	TRUE	FALSE	TRUE	TRUE
ENSDARG00000035151	FALSE	TRUE	FALSE	TRUE	TRUE
ENSDARG00000114183	FALSE	FALSE	FALSE	FALSE	FALSE
ENSDARG00000022895	FALSE	FALSE	FALSE	FALSE	FALSE
ENSDARG00000005454	FALSE	FALSE	FALSE	FALSE	FALSE
ENSDARG00000031126	FALSE	FALSE	FALSE	TRUE	TRUE
ENSDARG00000102694	FALSE	FALSE	FALSE	FALSE	FALSE
ENSDARG00000008592	FALSE	FALSE	TRUE	FALSE	FALSE
ENSDARG00000003701	FALSE	FALSE	FALSE	FALSE	FALSE
ENSDARG00000098744	FALSE	FALSE	FALSE	FALSE	FALSE
ENSDARG00000003968	FALSE	FALSE	FALSE	FALSE	FALSE
ENSDARG00000030844	FALSE	FALSE	FALSE	FALSE	FALSE
ENSDARG00000070818	FALSE	FALSE	FALSE	FALSE	FALSE
ENSDARG00000016253	FALSE	TRUE	FALSE	FALSE	TRUE
ENSDARG00000095620	FALSE	FALSE	FALSE	FALSE	FALSE
ENSDARG00000076754	FALSE	FALSE	FALSE	FALSE	FALSE
ENSDARG00000075562	FALSE	FALSE	FALSE	FALSE	FALSE
ENSDARG00000059073	FALSE	TRUE	TRUE	TRUE	TRUE
ENSDARG00000097916	FALSE	FALSE	FALSE	FALSE	FALSE
ENSDARG00000098955	FALSE	FALSE	FALSE	FALSE	FALSE
ENSDARG00000102599	FALSE	FALSE	FALSE	FALSE	FALSE
ENSDARG00000054343	FALSE	FALSE	FALSE	FALSE	FALSE
ENSDARG00000114566	FALSE	FALSE	FALSE	FALSE	FALSE
ENSDARG00000111975	FALSE	FALSE	FALSE	FALSE	FALSE
ENSDARG00000095328	FALSE	FALSE	FALSE	FALSE	TRUE
ENSDARG00000111501	FALSE	FALSE	FALSE	FALSE	FALSE
ENSDARG00000075551	FALSE	FALSE	FALSE	FALSE	FALSE
ENSDARG00000056659	FALSE	FALSE	FALSE	FALSE	FALSE
ENSDARG00000080608	FALSE	FALSE	TRUE	FALSE	FALSE
ENSDARG00000093342	FALSE	FALSE	FALSE	FALSE	FALSE
ENSDARG00000075543	FALSE	FALSE	FALSE	FALSE	TRUE
ENSDARG00000070644	FALSE	FALSE	FALSE	FALSE	FALSE
ENSDARG00000014303	FALSE	FALSE	FALSE	FALSE	FALSE
ENSDARG00000004823	FALSE	FALSE	FALSE	FALSE	FALSE
ENSDARG00000116481	FALSE	FALSE	FALSE	FALSE	FALSE
ENSDARG00000101093	FALSE	FALSE	FALSE	FALSE	FALSE
ENSDARG00000069118	FALSE	FALSE	FALSE	FALSE	FALSE
ENSDARG00000097478	FALSE	FALSE	FALSE	FALSE	FALSE
ENSDARG00000103739	FALSE	FALSE	FALSE	FALSE	FALSE
ENSDARG00000019213	FALSE	FALSE	FALSE	FALSE	FALSE
ENSDARG00000101980	FALSE	FALSE	TRUE	FALSE	FALSE
ENSDARG00000043795	FALSE	FALSE	FALSE	FALSE	FALSE
ENSDARG00000044485	TRUE	FALSE	FALSE	TRUE	TRUE
ENSDARG00000015531	FALSE	FALSE	FALSE	FALSE	FALSE
ENSDARG00000018611	FALSE	FALSE	TRUE	FALSE	FALSE
ENSDARG00000052454	FALSE	FALSE	FALSE	FALSE	FALSE
ENSDARG00000076807	FALSE	TRUE	FALSE	FALSE	FALSE
ENSDARG00000040816	FALSE	FALSE	FALSE	FALSE	FALSE
ENSDARG00000070953	FALSE	FALSE	FALSE	FALSE	FALSE
ENSDARG00000100608	FALSE	FALSE	FALSE	FALSE	FALSE
ENSDARG00000036414	FALSE	FALSE	FALSE	FALSE	FALSE
ENSDARG00000019426	FALSE	FALSE	FALSE	FALSE	TRUE
ENSDARG00000007430	FALSE	FALSE	FALSE	FALSE	FALSE
ENSDARG00000102151	FALSE	FALSE	FALSE	FALSE	FALSE
ENSDARG00000043209	FALSE	FALSE	FALSE	FALSE	TRUE
ENSDARG00000051899	FALSE	FALSE	FALSE	FALSE	FALSE
ENSDARG00000008886	FALSE	FALSE	FALSE	FALSE	TRUE
ENSDARG00000005246	FALSE	FALSE	FALSE	FALSE	FALSE
ENSDARG00000052826	FALSE	FALSE	FALSE	FALSE	FALSE
ENSDARG00000019747	FALSE	FALSE	FALSE	FALSE	TRUE
ENSDARG00000113793	FALSE	FALSE	FALSE	FALSE	FALSE
ENSDARG00000013075	FALSE	FALSE	TRUE	FALSE	FALSE
ENSDARG00000104508	FALSE	FALSE	FALSE	FALSE	FALSE
ENSDARG00000062712	FALSE	FALSE	FALSE	FALSE	FALSE
ENSDARG00000079631	FALSE	FALSE	FALSE	FALSE	TRUE
ENSDARG00000052375	FALSE	FALSE	FALSE	FALSE	FALSE
ENSDARG00000070142	FALSE	FALSE	FALSE	FALSE	TRUE
ENSDARG00000054253	FALSE	FALSE	FALSE	FALSE	FALSE
ENSDARG00000114599	FALSE	FALSE	FALSE	FALSE	FALSE
ENSDARG00000051959	FALSE	FALSE	FALSE	FALSE	FALSE
ENSDARG00000097830	FALSE	FALSE	TRUE	FALSE	FALSE
ENSDARG00000056015	FALSE	FALSE	TRUE	FALSE	FALSE
ENSDARG00000003989	FALSE	FALSE	FALSE	FALSE	FALSE
ENSDARG00000097813	FALSE	FALSE	FALSE	FALSE	FALSE
ENSDARG00000006487	FALSE	TRUE	FALSE	FALSE	TRUE
ENSDARG00000001785	FALSE	FALSE	FALSE	FALSE	FALSE
ENSDARG00000016753	FALSE	FALSE	FALSE	FALSE	FALSE
ENSDARG00000018643	FALSE	FALSE	FALSE	FALSE	FALSE
ENSDARG00000097112	FALSE	FALSE	FALSE	FALSE	FALSE
ENSDARG00000114836	FALSE	FALSE	FALSE	FALSE	FALSE
ENSDARG00000006003	TRUE	TRUE	FALSE	FALSE	FALSE
ENSDARG00000062699	FALSE	FALSE	FALSE	FALSE	FALSE
ENSDARG00000070452	FALSE	FALSE	FALSE	FALSE	FALSE
ENSDARG00000014246	FALSE	FALSE	FALSE	FALSE	FALSE
ENSDARG00000089232	FALSE	FALSE	FALSE	FALSE	FALSE
ENSDARG00000070621	FALSE	FALSE	FALSE	FALSE	FALSE
ENSDARG00000035161	FALSE	FALSE	TRUE	FALSE	FALSE
ENSDARG00000060542	FALSE	FALSE	FALSE	FALSE	FALSE
ENSDARG00000006878	FALSE	FALSE	FALSE	FALSE	FALSE
ENSDARG00000110007	FALSE	FALSE	FALSE	FALSE	FALSE
ENSDARG00000116608	FALSE	FALSE	FALSE	FALSE	FALSE
ENSDARG00000104961	FALSE	FALSE	FALSE	FALSE	FALSE
ENSDARG00000089814	FALSE	TRUE	FALSE	TRUE	TRUE
ENSDARG00000058730	FALSE	FALSE	FALSE	FALSE	TRUE
ENSDARG00000015563	FALSE	FALSE	FALSE	FALSE	FALSE
ENSDARG00000103441	FALSE	FALSE	FALSE	FALSE	FALSE
ENSDARG00000105573	FALSE	FALSE	FALSE	FALSE	FALSE
ENSDARG00000018492	FALSE	FALSE	FALSE	FALSE	FALSE
ENSDARG00000014571	TRUE	FALSE	FALSE	FALSE	TRUE
ENSDARG00000098359	FALSE	FALSE	FALSE	FALSE	FALSE
ENSDARG00000062139	FALSE	FALSE	FALSE	FALSE	FALSE
ENSDARG00000080774	FALSE	FALSE	FALSE	FALSE	FALSE
ENSDARG00000116759	FALSE	FALSE	FALSE	FALSE	FALSE
ENSDARG00000037998	FALSE	FALSE	FALSE	FALSE	FALSE
ENSDARG00000057899	FALSE	FALSE	FALSE	FALSE	FALSE
ENSDARG00000096803	FALSE	FALSE	FALSE	FALSE	FALSE
ENSDARG00000013576	TRUE	TRUE	FALSE	FALSE	TRUE
ENSDARG00000104953	FALSE	FALSE	FALSE	FALSE	FALSE
ENSDARG00000093220	TRUE	TRUE	FALSE	TRUE	TRUE
ENSDARG00000038159	FALSE	FALSE	FALSE	FALSE	TRUE
ENSDARG00000034518	FALSE	FALSE	FALSE	FALSE	TRUE
ENSDARG00000058693	FALSE	FALSE	FALSE	TRUE	TRUE
ENSDARG00000056978	FALSE	FALSE	FALSE	FALSE	TRUE
ENSDARG00000036670	TRUE	TRUE	TRUE	FALSE	TRUE
ENSDARG00000111943	FALSE	FALSE	FALSE	FALSE	FALSE
ENSDARG00000060374	FALSE	FALSE	FALSE	FALSE	FALSE
ENSDARG00000112791	FALSE	FALSE	FALSE	FALSE	FALSE
ENSDARG00000039455	FALSE	FALSE	FALSE	FALSE	TRUE
ENSDARG00000104290	FALSE	FALSE	FALSE	FALSE	FALSE
ENSDARG00000076140	FALSE	FALSE	FALSE	FALSE	FALSE
ENSDARG00000104932	FALSE	FALSE	FALSE	FALSE	FALSE
ENSDARG00000002787	FALSE	FALSE	TRUE	FALSE	FALSE
ENSDARG00000037066	FALSE	FALSE	FALSE	FALSE	FALSE
ENSDARG00000069252	FALSE	FALSE	TRUE	FALSE	TRUE
ENSDARG00000067964	FALSE	FALSE	FALSE	FALSE	FALSE
ENSDARG00000074317	FALSE	FALSE	FALSE	FALSE	FALSE
ENSDARG00000112506	FALSE	FALSE	FALSE	FALSE	FALSE
ENSDARG00000069142	FALSE	FALSE	FALSE	FALSE	FALSE
ENSDARG00000097891	FALSE	FALSE	FALSE	FALSE	FALSE
ENSDARG00000097452	FALSE	FALSE	FALSE	FALSE	FALSE
ENSDARG00000081802	FALSE	FALSE	FALSE	FALSE	FALSE
ENSDARG00000088178	FALSE	FALSE	TRUE	FALSE	TRUE
ENSDARG00000074271	FALSE	FALSE	FALSE	FALSE	FALSE
ENSDARG00000069735	FALSE	FALSE	FALSE	FALSE	FALSE
ENSDARG00000094887	TRUE	FALSE	FALSE	TRUE	FALSE
ENSDARG00000100145	FALSE	FALSE	FALSE	FALSE	FALSE
ENSDARG00000011122	FALSE	FALSE	FALSE	FALSE	FALSE
ENSDARG00000109864	FALSE	FALSE	FALSE	FALSE	FALSE
ENSDARG00000077881	FALSE	FALSE	FALSE	FALSE	FALSE
ENSDARG00000061124	FALSE	FALSE	FALSE	FALSE	FALSE
ENSDARG00000052387	FALSE	FALSE	FALSE	FALSE	FALSE
ENSDARG00000097455	FALSE	FALSE	TRUE	FALSE	FALSE
ENSDARG00000087152	FALSE	FALSE	FALSE	FALSE	FALSE
ENSDARG00000117179	FALSE	FALSE	FALSE	FALSE	FALSE
ENSDARG00000088204	FALSE	FALSE	FALSE	FALSE	FALSE
ENSDARG00000032816	FALSE	FALSE	FALSE	FALSE	FALSE
ENSDARG00000080493	FALSE	TRUE	TRUE	FALSE	FALSE
ENSDARG00000092014	FALSE	FALSE	FALSE	FALSE	FALSE
ENSDARG00000044144	FALSE	FALSE	FALSE	FALSE	FALSE
ENSDARG00000076768	FALSE	FALSE	FALSE	FALSE	FALSE
ENSDARG00000074293	FALSE	FALSE	FALSE	FALSE	FALSE
ENSDARG00000038905	FALSE	FALSE	FALSE	FALSE	FALSE
ENSDARG00000098378	FALSE	FALSE	FALSE	FALSE	FALSE
ENSDARG00000100121	FALSE	FALSE	FALSE	FALSE	FALSE
ENSDARG00000044597	FALSE	FALSE	FALSE	FALSE	FALSE
ENSDARG00000055481	FALSE	FALSE	TRUE	FALSE	FALSE
ENSDARG00000057296	FALSE	FALSE	FALSE	FALSE	FALSE
ENSDARG00000093787	TRUE	TRUE	FALSE	TRUE	TRUE
ENSDARG00000002707	FALSE	TRUE	TRUE	FALSE	FALSE
ENSDARG00000087780	FALSE	FALSE	FALSE	FALSE	FALSE
ENSDARG00000097267	FALSE	FALSE	FALSE	FALSE	FALSE
ENSDARG00000010948	FALSE	FALSE	FALSE	FALSE	FALSE
ENSDARG00000115819	FALSE	FALSE	FALSE	FALSE	FALSE
ENSDARG00000113369	FALSE	FALSE	FALSE	FALSE	FALSE
ENSDARG00000014479	FALSE	FALSE	FALSE	FALSE	FALSE
ENSDARG00000043211	FALSE	FALSE	FALSE	TRUE	FALSE
ENSDARG00000061640	FALSE	FALSE	FALSE	FALSE	FALSE
ENSDARG00000077788	FALSE	FALSE	FALSE	FALSE	FALSE
ENSDARG00000089930	FALSE	FALSE	FALSE	FALSE	FALSE
ENSDARG00000063167	FALSE	FALSE	FALSE	FALSE	FALSE
ENSDARG00000105230	FALSE	FALSE	TRUE	FALSE	FALSE
ENSDARG00000087393	FALSE	FALSE	FALSE	FALSE	FALSE
ENSDARG00000006350	FALSE	FALSE	FALSE	FALSE	FALSE
ENSDARG00000003751	FALSE	FALSE	FALSE	FALSE	FALSE
ENSDARG00000109941	FALSE	FALSE	FALSE	FALSE	FALSE
ENSDARG00000089090	FALSE	FALSE	FALSE	FALSE	FALSE
ENSDARG00000015674	FALSE	FALSE	FALSE	FALSE	TRUE
ENSDARG00000117262	FALSE	FALSE	FALSE	FALSE	FALSE
ENSDARG00000077948	FALSE	FALSE	FALSE	FALSE	FALSE
ENSDARG00000115654	FALSE	FALSE	FALSE	FALSE	FALSE
ENSDARG00000062063	FALSE	FALSE	FALSE	FALSE	TRUE
ENSDARG00000036065	FALSE	FALSE	TRUE	TRUE	TRUE
ENSDARG00000095912	FALSE	FALSE	FALSE	FALSE	FALSE
ENSDARG00000103361	FALSE	FALSE	FALSE	FALSE	FALSE
ENSDARG00000056284	FALSE	FALSE	FALSE	FALSE	FALSE
ENSDARG00000053196	FALSE	FALSE	FALSE	FALSE	FALSE
ENSDARG00000098037	FALSE	FALSE	FALSE	FALSE	FALSE
ENSDARG00000018534	FALSE	FALSE	FALSE	FALSE	FALSE
ENSDARG00000081997	FALSE	FALSE	FALSE	FALSE	FALSE
ENSDARG00000114956	FALSE	FALSE	FALSE	FALSE	FALSE
ENSDARG00000110445	FALSE	FALSE	FALSE	FALSE	FALSE
ENSDARG00000112296	FALSE	FALSE	FALSE	FALSE	FALSE
ENSDARG00000014018	FALSE	FALSE	FALSE	FALSE	TRUE
ENSDARG00000116026	FALSE	FALSE	FALSE	FALSE	FALSE
ENSDARG00000093022	FALSE	FALSE	FALSE	FALSE	FALSE
ENSDARG00000109546	FALSE	FALSE	FALSE	FALSE	FALSE
ENSDARG00000004445	FALSE	FALSE	FALSE	FALSE	FALSE
ENSDARG00000103499	FALSE	FALSE	FALSE	FALSE	FALSE
ENSDARG00000042322	FALSE	TRUE	FALSE	FALSE	FALSE
ENSDARG00000035131	FALSE	FALSE	FALSE	FALSE	FALSE
ENSDARG00000104297	FALSE	FALSE	FALSE	FALSE	FALSE
ENSDARG00000035694	FALSE	FALSE	FALSE	TRUE	TRUE
ENSDARG00000057556	FALSE	FALSE	FALSE	FALSE	TRUE
ENSDARG00000036135	FALSE	FALSE	FALSE	FALSE	FALSE
ENSDARG00000104963	FALSE	FALSE	FALSE	FALSE	FALSE
ENSDARG00000056666	FALSE	FALSE	FALSE	FALSE	FALSE
ENSDARG00000097918	FALSE	FALSE	FALSE	FALSE	FALSE
ENSDARG00000104581	FALSE	FALSE	FALSE	FALSE	FALSE
ENSDARG00000107177	FALSE	FALSE	FALSE	FALSE	FALSE
ENSDARG00000078962	FALSE	FALSE	FALSE	FALSE	TRUE
ENSDARG00000017255	FALSE	FALSE	FALSE	FALSE	FALSE
ENSDARG00000101423	FALSE	FALSE	FALSE	FALSE	FALSE
ENSDARG00000069961	FALSE	FALSE	FALSE	FALSE	FALSE
ENSDARG00000007086	FALSE	FALSE	FALSE	FALSE	FALSE
ENSDARG00000099518	FALSE	FALSE	FALSE	FALSE	FALSE
ENSDARG00000019345	FALSE	FALSE	FALSE	FALSE	FALSE
ENSDARG00000035570	FALSE	FALSE	FALSE	FALSE	FALSE
ENSDARG00000024894	FALSE	FALSE	FALSE	FALSE	FALSE
ENSDARG00000015128	FALSE	FALSE	FALSE	FALSE	TRUE
ENSDARG00000009212	FALSE	FALSE	FALSE	FALSE	TRUE
ENSDARG00000098428	FALSE	FALSE	FALSE	FALSE	FALSE
ENSDARG00000093131	FALSE	FALSE	FALSE	FALSE	FALSE
ENSDARG00000073962	FALSE	FALSE	FALSE	FALSE	FALSE
ENSDARG00000088915	FALSE	FALSE	FALSE	FALSE	FALSE
ENSDARG00000086457	FALSE	FALSE	FALSE	FALSE	FALSE
ENSDARG00000031911	FALSE	FALSE	FALSE	FALSE	TRUE
ENSDARG00000098312	FALSE	FALSE	FALSE	FALSE	FALSE
ENSDARG00000079350	FALSE	FALSE	FALSE	FALSE	TRUE
ENSDARG00000033182	TRUE	TRUE	TRUE	TRUE	TRUE
ENSDARG00000075383	FALSE	FALSE	FALSE	FALSE	FALSE
ENSDARG00000012446	FALSE	FALSE	FALSE	FALSE	FALSE
ENSDARG00000117320	FALSE	FALSE	TRUE	FALSE	FALSE
ENSDARG00000087646	FALSE	FALSE	FALSE	FALSE	FALSE
ENSDARG00000057886	FALSE	FALSE	FALSE	FALSE	FALSE
ENSDARG00000038569	FALSE	TRUE	TRUE	FALSE	TRUE
ENSDARG00000013020	FALSE	FALSE	FALSE	FALSE	FALSE
ENSDARG00000005115	FALSE	FALSE	FALSE	FALSE	FALSE
ENSDARG00000095937	FALSE	FALSE	FALSE	FALSE	FALSE
ENSDARG00000053990	FALSE	FALSE	FALSE	FALSE	TRUE
ENSDARG00000098155	FALSE	FALSE	FALSE	FALSE	FALSE
ENSDARG00000101886	FALSE	FALSE	FALSE	FALSE	FALSE
ENSDARG00000101512	FALSE	FALSE	FALSE	FALSE	FALSE
ENSDARG00000035391	FALSE	FALSE	FALSE	FALSE	FALSE
ENSDARG00000057626	FALSE	FALSE	FALSE	FALSE	FALSE

## Sheet: Nanog MBT new target
Gene	first-wave transcribed genes	early ZGA genes	down-regulated in nanog MO 4hpf (Lee, et al. 2013 Nature)	down-regulated in nanog MO 6hpf (Lee, et al. 2013 Nature)
ENSDARG00000036282	FALSE	FALSE	FALSE	FALSE
ENSDARG00000070786	FALSE	FALSE	FALSE	FALSE
ENSDARG00000042977	FALSE	FALSE	FALSE	FALSE
ENSDARG00000096921	FALSE	FALSE	FALSE	FALSE
ENSDARG00000104068	FALSE	FALSE	FALSE	FALSE
ENSDARG00000093648	FALSE	FALSE	FALSE	FALSE
ENSDARG00000010519	FALSE	FALSE	FALSE	FALSE
ENSDARG00000100773	FALSE	FALSE	FALSE	FALSE
ENSDARG00000070029	FALSE	FALSE	FALSE	FALSE
ENSDARG00000006546	FALSE	FALSE	FALSE	FALSE
ENSDARG00000114922	FALSE	FALSE	FALSE	FALSE
ENSDARG00000044092	FALSE	FALSE	FALSE	FALSE
ENSDARG00000042139	FALSE	FALSE	FALSE	FALSE
ENSDARG00000036546	FALSE	FALSE	FALSE	FALSE
ENSDARG00000062187	FALSE	FALSE	FALSE	FALSE
ENSDARG00000042485	TRUE	TRUE	FALSE	FALSE
ENSDARG00000094186	FALSE	FALSE	FALSE	FALSE
ENSDARG00000038977	FALSE	FALSE	FALSE	FALSE
ENSDARG00000099103	FALSE	FALSE	FALSE	FALSE
ENSDARG00000073847	FALSE	FALSE	FALSE	FALSE
ENSDARG00000015474	FALSE	FALSE	FALSE	FALSE
ENSDARG00000110594	FALSE	FALSE	FALSE	FALSE
ENSDARG00000052279	TRUE	FALSE	TRUE	FALSE
ENSDARG00000068732	FALSE	FALSE	TRUE	TRUE
ENSDARG00000071727	FALSE	FALSE	FALSE	FALSE
ENSDARG00000077530	FALSE	FALSE	FALSE	TRUE
ENSDARG00000097748	FALSE	FALSE	FALSE	FALSE
ENSDARG00000086819	FALSE	FALSE	FALSE	FALSE
ENSDARG00000003941	FALSE	FALSE	FALSE	TRUE
ENSDARG00000058088	FALSE	FALSE	FALSE	FALSE
ENSDARG00000005150	FALSE	FALSE	FALSE	FALSE
ENSDARG00000103270	FALSE	FALSE	FALSE	FALSE
ENSDARG00000117678	FALSE	FALSE	FALSE	FALSE
ENSDARG00000096429	FALSE	FALSE	FALSE	FALSE
ENSDARG00000019692	FALSE	FALSE	FALSE	FALSE
ENSDARG00000018334	FALSE	FALSE	FALSE	TRUE
ENSDARG00000043581	FALSE	FALSE	FALSE	FALSE
ENSDARG00000028118	FALSE	FALSE	FALSE	FALSE
ENSDARG00000022456	FALSE	FALSE	FALSE	FALSE
ENSDARG00000054916	FALSE	FALSE	FALSE	TRUE
ENSDARG00000055945	FALSE	FALSE	FALSE	FALSE
ENSDARG00000005841	FALSE	FALSE	FALSE	FALSE
ENSDARG00000043661	FALSE	FALSE	FALSE	FALSE
ENSDARG00000094206	FALSE	FALSE	FALSE	FALSE
ENSDARG00000017007	FALSE	FALSE	FALSE	FALSE
ENSDARG00000113979	FALSE	FALSE	FALSE	FALSE
ENSDARG00000079201	FALSE	FALSE	FALSE	FALSE
ENSDARG00000105258	FALSE	FALSE	FALSE	FALSE
ENSDARG00000097709	FALSE	FALSE	FALSE	FALSE
ENSDARG00000003193	FALSE	FALSE	FALSE	TRUE
ENSDARG00000071669	FALSE	FALSE	FALSE	FALSE
ENSDARG00000078624	FALSE	FALSE	FALSE	FALSE
ENSDARG00000113335	FALSE	FALSE	FALSE	FALSE
ENSDARG00000115874	FALSE	FALSE	FALSE	FALSE
ENSDARG00000055100	FALSE	FALSE	FALSE	FALSE
ENSDARG00000098639	FALSE	FALSE	FALSE	FALSE
ENSDARG00000056322	FALSE	FALSE	FALSE	FALSE
ENSDARG00000003544	FALSE	FALSE	FALSE	FALSE
ENSDARG00000097543	FALSE	FALSE	FALSE	FALSE
ENSDARG00000099025	FALSE	FALSE	FALSE	FALSE
ENSDARG00000042548	FALSE	FALSE	FALSE	FALSE
ENSDARG00000070434	FALSE	TRUE	FALSE	TRUE
ENSDARG00000112740	FALSE	FALSE	FALSE	FALSE
ENSDARG00000116871	FALSE	FALSE	FALSE	FALSE
ENSDARG00000071018	FALSE	FALSE	FALSE	FALSE
ENSDARG00000045305	FALSE	FALSE	FALSE	TRUE
ENSDARG00000100995	FALSE	FALSE	FALSE	FALSE
ENSDARG00000045343	FALSE	FALSE	FALSE	FALSE
ENSDARG00000053918	FALSE	FALSE	FALSE	FALSE
ENSDARG00000095451	TRUE	FALSE	FALSE	FALSE
ENSDARG00000070847	FALSE	FALSE	FALSE	FALSE
ENSDARG00000001975	FALSE	FALSE	FALSE	FALSE
ENSDARG00000054632	FALSE	FALSE	FALSE	FALSE
ENSDARG00000054501	FALSE	FALSE	FALSE	FALSE
ENSDARG00000076120	FALSE	FALSE	FALSE	FALSE
ENSDARG00000079605	FALSE	FALSE	FALSE	TRUE
ENSDARG00000020761	FALSE	FALSE	FALSE	FALSE
ENSDARG00000093636	FALSE	FALSE	FALSE	FALSE
ENSDARG00000116723	FALSE	FALSE	FALSE	FALSE
ENSDARG00000042688	FALSE	FALSE	FALSE	TRUE
ENSDARG00000068976	FALSE	FALSE	FALSE	FALSE
ENSDARG00000088638	FALSE	FALSE	FALSE	FALSE
ENSDARG00000012816	FALSE	FALSE	FALSE	FALSE
ENSDARG00000089689	FALSE	FALSE	FALSE	FALSE
ENSDARG00000010571	FALSE	FALSE	FALSE	TRUE
ENSDARG00000018107	FALSE	FALSE	FALSE	FALSE
ENSDARG00000097013	FALSE	FALSE	FALSE	FALSE
ENSDARG00000010717	FALSE	FALSE	FALSE	FALSE
ENSDARG00000020948	FALSE	FALSE	FALSE	FALSE
ENSDARG00000100084	FALSE	FALSE	FALSE	FALSE
ENSDARG00000089291	FALSE	FALSE	FALSE	FALSE
ENSDARG00000104137	FALSE	FALSE	FALSE	FALSE
ENSDARG00000096690	FALSE	FALSE	FALSE	FALSE
ENSDARG00000006120	FALSE	FALSE	FALSE	TRUE
ENSDARG00000115833	FALSE	FALSE	FALSE	FALSE
ENSDARG00000088439	FALSE	FALSE	FALSE	FALSE
ENSDARG00000057671	FALSE	FALSE	FALSE	FALSE
ENSDARG00000021959	FALSE	FALSE	FALSE	FALSE
ENSDARG00000053829	FALSE	FALSE	FALSE	FALSE
ENSDARG00000041065	TRUE	TRUE	TRUE	TRUE
ENSDARG00000002082	FALSE	FALSE	FALSE	TRUE
ENSDARG00000113839	FALSE	FALSE	FALSE	FALSE
ENSDARG00000077352	FALSE	FALSE	FALSE	FALSE
ENSDARG00000069074	FALSE	FALSE	FALSE	FALSE
ENSDARG00000117501	FALSE	FALSE	FALSE	FALSE
ENSDARG00000033683	FALSE	FALSE	FALSE	FALSE
ENSDARG00000092800	FALSE	FALSE	FALSE	FALSE
ENSDARG00000060113	FALSE	FALSE	FALSE	FALSE
ENSDARG00000015199	FALSE	FALSE	FALSE	FALSE
ENSDARG00000041791	FALSE	FALSE	FALSE	FALSE
ENSDARG00000099083	FALSE	FALSE	FALSE	FALSE
ENSDARG00000109568	FALSE	FALSE	FALSE	FALSE
ENSDARG00000104389	FALSE	FALSE	FALSE	FALSE
ENSDARG00000026454	FALSE	FALSE	FALSE	FALSE
ENSDARG00000087519	FALSE	FALSE	FALSE	FALSE
ENSDARG00000096403	FALSE	FALSE	FALSE	FALSE
ENSDARG00000094457	FALSE	FALSE	FALSE	TRUE
ENSDARG00000098529	FALSE	FALSE	FALSE	FALSE
ENSDARG00000039429	FALSE	FALSE	FALSE	FALSE
ENSDARG00000016396	FALSE	FALSE	FALSE	FALSE
ENSDARG00000104458	FALSE	FALSE	FALSE	FALSE
ENSDARG00000100097	FALSE	FALSE	FALSE	FALSE
ENSDARG00000061057	FALSE	FALSE	FALSE	FALSE
ENSDARG00000104101	FALSE	FALSE	FALSE	FALSE
ENSDARG00000054530	FALSE	FALSE	FALSE	FALSE
ENSDARG00000016811	FALSE	FALSE	FALSE	FALSE
ENSDARG00000111831	FALSE	FALSE	FALSE	FALSE
ENSDARG00000068981	FALSE	FALSE	FALSE	FALSE
ENSDARG00000038867	FALSE	FALSE	FALSE	FALSE
ENSDARG00000117820	FALSE	FALSE	FALSE	FALSE
ENSDARG00000080462	FALSE	FALSE	FALSE	FALSE
ENSDARG00000037100	FALSE	FALSE	FALSE	TRUE
ENSDARG00000069543	FALSE	FALSE	FALSE	FALSE
ENSDARG00000111111	FALSE	FALSE	FALSE	FALSE
ENSDARG00000060393	FALSE	FALSE	FALSE	FALSE
ENSDARG00000082738	FALSE	FALSE	FALSE	FALSE
ENSDARG00000081574	FALSE	FALSE	FALSE	FALSE
ENSDARG00000006640	FALSE	FALSE	FALSE	FALSE
ENSDARG00000045417	FALSE	FALSE	FALSE	FALSE
ENSDARG00000027984	FALSE	FALSE	FALSE	FALSE
ENSDARG00000055926	FALSE	FALSE	FALSE	FALSE
ENSDARG00000103994	FALSE	FALSE	FALSE	FALSE
ENSDARG00000117765	FALSE	FALSE	FALSE	FALSE
ENSDARG00000089033	FALSE	FALSE	FALSE	FALSE
ENSDARG00000017240	FALSE	FALSE	FALSE	FALSE
ENSDARG00000036422	FALSE	FALSE	FALSE	TRUE
ENSDARG00000020279	FALSE	FALSE	FALSE	FALSE
ENSDARG00000087030	FALSE	FALSE	FALSE	FALSE
ENSDARG00000001014	FALSE	FALSE	FALSE	FALSE
ENSDARG00000005010	FALSE	FALSE	FALSE	FALSE
ENSDARG00000008192	FALSE	FALSE	FALSE	FALSE
ENSDARG00000054122	FALSE	FALSE	FALSE	FALSE
ENSDARG00000099768	FALSE	FALSE	FALSE	FALSE
ENSDARG00000098057	FALSE	FALSE	FALSE	FALSE
ENSDARG00000012367	FALSE	FALSE	FALSE	FALSE
ENSDARG00000019585	FALSE	FALSE	FALSE	FALSE
ENSDARG00000093170	FALSE	FALSE	FALSE	FALSE
ENSDARG00000070490	FALSE	FALSE	FALSE	FALSE
ENSDARG00000024488	FALSE	FALSE	FALSE	FALSE
ENSDARG00000093036	FALSE	FALSE	FALSE	FALSE
ENSDARG00000007709	FALSE	FALSE	FALSE	FALSE
ENSDARG00000058000	FALSE	FALSE	FALSE	TRUE
ENSDARG00000059815	FALSE	FALSE	FALSE	FALSE
ENSDARG00000051890	FALSE	FALSE	FALSE	FALSE
ENSDARG00000004889	FALSE	FALSE	FALSE	FALSE
ENSDARG00000004251	FALSE	FALSE	FALSE	FALSE
ENSDARG00000058906	FALSE	FALSE	FALSE	FALSE
ENSDARG00000098798	FALSE	FALSE	FALSE	FALSE
ENSDARG00000071570	FALSE	FALSE	FALSE	FALSE
ENSDARG00000098511	FALSE	FALSE	FALSE	FALSE
ENSDARG00000030176	FALSE	FALSE	FALSE	FALSE
ENSDARG00000109601	FALSE	FALSE	FALSE	FALSE
ENSDARG00000113612	FALSE	FALSE	FALSE	FALSE
ENSDARG00000111764	FALSE	FALSE	FALSE	FALSE
ENSDARG00000103638	FALSE	FALSE	FALSE	FALSE
ENSDARG00000029230	FALSE	FALSE	FALSE	FALSE
ENSDARG00000099194	FALSE	FALSE	FALSE	FALSE
ENSDARG00000040284	FALSE	FALSE	FALSE	FALSE
ENSDARG00000041363	FALSE	FALSE	FALSE	FALSE
ENSDARG00000115815	FALSE	FALSE	FALSE	FALSE
ENSDARG00000055672	FALSE	FALSE	FALSE	FALSE
ENSDARG00000037879	TRUE	TRUE	TRUE	FALSE
ENSDARG00000006010	FALSE	FALSE	FALSE	FALSE
ENSDARG00000014907	FALSE	FALSE	FALSE	FALSE
ENSDARG00000074337	FALSE	FALSE	FALSE	FALSE
ENSDARG00000099197	FALSE	FALSE	FALSE	FALSE
ENSDARG00000060089	FALSE	FALSE	FALSE	FALSE
ENSDARG00000074583	FALSE	FALSE	FALSE	FALSE
ENSDARG00000112419	FALSE	FALSE	FALSE	FALSE
ENSDARG00000017703	FALSE	FALSE	FALSE	TRUE
ENSDARG00000057374	FALSE	FALSE	FALSE	FALSE
ENSDARG00000078106	FALSE	FALSE	FALSE	FALSE
ENSDARG00000102756	FALSE	FALSE	FALSE	FALSE
ENSDARG00000028306	FALSE	FALSE	FALSE	FALSE
ENSDARG00000023814	FALSE	FALSE	FALSE	FALSE
ENSDARG00000011496	FALSE	FALSE	FALSE	FALSE
ENSDARG00000004851	FALSE	FALSE	FALSE	FALSE
ENSDARG00000112565	FALSE	FALSE	FALSE	FALSE
ENSDARG00000020469	FALSE	FALSE	FALSE	TRUE
ENSDARG00000042401	FALSE	FALSE	FALSE	FALSE
ENSDARG00000111995	FALSE	FALSE	FALSE	FALSE
ENSDARG00000014775	FALSE	FALSE	FALSE	TRUE
ENSDARG00000061454	FALSE	FALSE	FALSE	FALSE
ENSDARG00000059337	FALSE	TRUE	TRUE	TRUE
ENSDARG00000086449	FALSE	FALSE	FALSE	FALSE
ENSDARG00000017446	FALSE	FALSE	FALSE	FALSE
ENSDARG00000082131	FALSE	FALSE	FALSE	FALSE
ENSDARG00000004597	FALSE	FALSE	FALSE	FALSE
ENSDARG00000100555	FALSE	FALSE	FALSE	FALSE
ENSDARG00000038792	TRUE	TRUE	FALSE	TRUE
ENSDARG00000099060	FALSE	FALSE	FALSE	FALSE
ENSDARG00000088238	FALSE	FALSE	FALSE	FALSE
ENSDARG00000077038	FALSE	FALSE	FALSE	TRUE
ENSDARG00000093797	FALSE	FALSE	FALSE	FALSE
ENSDARG00000011594	FALSE	FALSE	FALSE	TRUE
ENSDARG00000117047	FALSE	FALSE	FALSE	FALSE
ENSDARG00000113162	FALSE	FALSE	FALSE	FALSE
ENSDARG00000034215	FALSE	FALSE	FALSE	FALSE
ENSDARG00000098536	FALSE	FALSE	FALSE	FALSE
ENSDARG00000074085	FALSE	FALSE	FALSE	FALSE
ENSDARG00000077783	FALSE	FALSE	FALSE	FALSE
ENSDARG00000007959	FALSE	FALSE	FALSE	FALSE
ENSDARG00000103672	FALSE	FALSE	FALSE	FALSE
ENSDARG00000117721	FALSE	FALSE	FALSE	FALSE
ENSDARG00000100047	FALSE	FALSE	FALSE	FALSE
ENSDARG00000045155	FALSE	FALSE	FALSE	TRUE
ENSDARG00000103696	FALSE	FALSE	FALSE	FALSE
ENSDARG00000058079	FALSE	FALSE	FALSE	FALSE
ENSDARG00000005541	FALSE	FALSE	FALSE	FALSE
ENSDARG00000069752	FALSE	FALSE	FALSE	FALSE
ENSDARG00000070340	FALSE	FALSE	FALSE	FALSE
ENSDARG00000020946	FALSE	FALSE	FALSE	FALSE
ENSDARG00000042120	FALSE	FALSE	FALSE	FALSE
ENSDARG00000052408	FALSE	FALSE	FALSE	FALSE
ENSDARG00000034541	FALSE	FALSE	FALSE	FALSE
ENSDARG00000024828	FALSE	FALSE	FALSE	TRUE
ENSDARG00000035949	FALSE	FALSE	FALSE	FALSE
ENSDARG00000021372	FALSE	FALSE	FALSE	FALSE
ENSDARG00000031075	FALSE	FALSE	FALSE	FALSE
ENSDARG00000078473	FALSE	FALSE	FALSE	TRUE
ENSDARG00000100558	FALSE	FALSE	FALSE	FALSE
ENSDARG00000055575	FALSE	FALSE	FALSE	FALSE
ENSDARG00000031929	FALSE	TRUE	FALSE	TRUE
ENSDARG00000079500	FALSE	FALSE	FALSE	FALSE
ENSDARG00000018814	FALSE	FALSE	FALSE	FALSE
ENSDARG00000033447	FALSE	FALSE	FALSE	FALSE
ENSDARG00000055076	FALSE	FALSE	FALSE	TRUE
ENSDARG00000106283	FALSE	FALSE	FALSE	FALSE
ENSDARG00000103251	FALSE	FALSE	FALSE	FALSE
ENSDARG00000071198	FALSE	FALSE	FALSE	FALSE
ENSDARG00000043976	FALSE	FALSE	FALSE	TRUE
ENSDARG00000116862	FALSE	FALSE	FALSE	FALSE
ENSDARG00000044541	FALSE	FALSE	FALSE	FALSE
ENSDARG00000107022	FALSE	FALSE	FALSE	FALSE
ENSDARG00000116746	FALSE	FALSE	FALSE	FALSE
ENSDARG00000089697	FALSE	TRUE	FALSE	FALSE
ENSDARG00000001940	FALSE	FALSE	FALSE	FALSE
ENSDARG00000083254	FALSE	FALSE	FALSE	FALSE
ENSDARG00000036074	FALSE	FALSE	FALSE	TRUE
ENSDARG00000076857	TRUE	TRUE	FALSE	FALSE
ENSDARG00000011065	FALSE	FALSE	FALSE	FALSE
ENSDARG00000102905	FALSE	FALSE	FALSE	FALSE
ENSDARG00000103736	FALSE	FALSE	FALSE	FALSE
ENSDARG00000040407	FALSE	FALSE	FALSE	FALSE
ENSDARG00000020301	FALSE	FALSE	FALSE	FALSE
ENSDARG00000077664	FALSE	FALSE	FALSE	FALSE
ENSDARG00000039034	TRUE	TRUE	FALSE	TRUE
ENSDARG00000095513	FALSE	FALSE	FALSE	FALSE
ENSDARG00000099814	FALSE	FALSE	FALSE	FALSE
ENSDARG00000005549	FALSE	FALSE	FALSE	FALSE
ENSDARG00000097374	FALSE	FALSE	FALSE	FALSE
ENSDARG00000041910	FALSE	FALSE	FALSE	FALSE
ENSDARG00000074111	FALSE	FALSE	FALSE	FALSE
ENSDARG00000039270	FALSE	FALSE	FALSE	FALSE
ENSDARG00000102124	FALSE	FALSE	FALSE	FALSE
ENSDARG00000115278	FALSE	FALSE	FALSE	FALSE
ENSDARG00000094662	FALSE	FALSE	FALSE	FALSE
ENSDARG00000075397	FALSE	FALSE	FALSE	FALSE
ENSDARG00000052512	FALSE	FALSE	FALSE	FALSE
ENSDARG00000027687	FALSE	FALSE	FALSE	FALSE
ENSDARG00000017274	FALSE	FALSE	FALSE	FALSE
ENSDARG00000070688	FALSE	FALSE	FALSE	FALSE
ENSDARG00000008263	FALSE	FALSE	FALSE	FALSE
ENSDARG00000113873	FALSE	FALSE	FALSE	FALSE
ENSDARG00000043720	FALSE	FALSE	FALSE	FALSE
ENSDARG00000097200	FALSE	FALSE	FALSE	FALSE
ENSDARG00000113337	FALSE	FALSE	FALSE	FALSE
ENSDARG00000114972	FALSE	FALSE	FALSE	FALSE
ENSDARG00000013500	FALSE	FALSE	FALSE	FALSE
ENSDARG00000004695	FALSE	FALSE	FALSE	TRUE
ENSDARG00000105600	FALSE	FALSE	FALSE	FALSE
ENSDARG00000078251	FALSE	FALSE	FALSE	FALSE
ENSDARG00000094754	FALSE	FALSE	FALSE	FALSE
ENSDARG00000009285	FALSE	FALSE	FALSE	TRUE
ENSDARG00000059596	FALSE	FALSE	FALSE	FALSE
ENSDARG00000096744	FALSE	FALSE	FALSE	FALSE
ENSDARG00000002947	FALSE	FALSE	FALSE	FALSE
ENSDARG00000069386	FALSE	FALSE	FALSE	TRUE
ENSDARG00000042004	FALSE	FALSE	FALSE	TRUE
ENSDARG00000035132	FALSE	FALSE	FALSE	TRUE
ENSDARG00000105190	FALSE	FALSE	FALSE	FALSE
ENSDARG00000060745	FALSE	FALSE	FALSE	FALSE
ENSDARG00000099545	FALSE	FALSE	FALSE	FALSE
ENSDARG00000038639	FALSE	FALSE	FALSE	TRUE
ENSDARG00000087993	FALSE	FALSE	FALSE	FALSE
ENSDARG00000007349	FALSE	FALSE	FALSE	FALSE
ENSDARG00000116829	FALSE	FALSE	FALSE	FALSE
ENSDARG00000111726	FALSE	FALSE	FALSE	FALSE
ENSDARG00000004023	FALSE	FALSE	FALSE	FALSE
ENSDARG00000002722	FALSE	FALSE	FALSE	FALSE
ENSDARG00000086764	FALSE	FALSE	FALSE	FALSE
ENSDARG00000101966	FALSE	FALSE	FALSE	FALSE
ENSDARG00000079891	FALSE	FALSE	FALSE	FALSE
ENSDARG00000040657	FALSE	FALSE	FALSE	FALSE
ENSDARG00000117236	FALSE	FALSE	FALSE	FALSE
ENSDARG00000104576	FALSE	FALSE	FALSE	FALSE
ENSDARG00000097368	FALSE	FALSE	FALSE	FALSE
ENSDARG00000026519	FALSE	FALSE	FALSE	FALSE
ENSDARG00000090949	FALSE	FALSE	FALSE	FALSE
ENSDARG00000068726	FALSE	FALSE	FALSE	FALSE
ENSDARG00000102363	FALSE	FALSE	FALSE	FALSE
ENSDARG00000076290	FALSE	FALSE	FALSE	FALSE
ENSDARG00000098184	FALSE	FALSE	FALSE	FALSE
ENSDARG00000004517	FALSE	FALSE	FALSE	TRUE
ENSDARG00000115614	FALSE	FALSE	FALSE	FALSE
ENSDARG00000017809	FALSE	FALSE	FALSE	TRUE
ENSDARG00000092752	FALSE	FALSE	FALSE	FALSE
ENSDARG00000068398	FALSE	FALSE	FALSE	FALSE
ENSDARG00000093768	FALSE	FALSE	FALSE	TRUE
ENSDARG00000053571	FALSE	FALSE	FALSE	FALSE
ENSDARG00000097526	FALSE	FALSE	FALSE	FALSE
ENSDARG00000041911	FALSE	FALSE	FALSE	TRUE
ENSDARG00000012432	FALSE	FALSE	FALSE	TRUE
ENSDARG00000004954	FALSE	FALSE	FALSE	FALSE
ENSDARG00000010059	FALSE	FALSE	FALSE	FALSE
ENSDARG00000013741	FALSE	FALSE	FALSE	TRUE
ENSDARG00000083047	FALSE	FALSE	FALSE	FALSE
ENSDARG00000040635	FALSE	FALSE	FALSE	FALSE
ENSDARG00000020123	FALSE	FALSE	FALSE	FALSE
ENSDARG00000104307	FALSE	FALSE	FALSE	FALSE
ENSDARG00000042141	FALSE	FALSE	FALSE	FALSE
ENSDARG00000030602	FALSE	FALSE	FALSE	TRUE
ENSDARG00000052182	FALSE	FALSE	FALSE	FALSE
ENSDARG00000007960	FALSE	FALSE	FALSE	FALSE
ENSDARG00000115434	FALSE	FALSE	FALSE	FALSE
ENSDARG00000007975	FALSE	FALSE	FALSE	FALSE
ENSDARG00000069937	FALSE	FALSE	FALSE	FALSE
ENSDARG00000077410	FALSE	FALSE	FALSE	FALSE
ENSDARG00000044083	FALSE	FALSE	FALSE	FALSE
ENSDARG00000000189	FALSE	FALSE	FALSE	FALSE
ENSDARG00000040890	FALSE	FALSE	FALSE	FALSE
ENSDARG00000112814	FALSE	FALSE	FALSE	FALSE
ENSDARG00000052652	FALSE	FALSE	FALSE	FALSE
ENSDARG00000100583	FALSE	FALSE	FALSE	FALSE
ENSDARG00000053485	FALSE	FALSE	FALSE	FALSE
ENSDARG00000085485	FALSE	FALSE	FALSE	FALSE
ENSDARG00000017821	FALSE	FALSE	FALSE	TRUE
ENSDARG00000038067	FALSE	FALSE	FALSE	TRUE
ENSDARG00000116097	FALSE	FALSE	FALSE	FALSE
ENSDARG00000099054	FALSE	FALSE	FALSE	FALSE
ENSDARG00000109664	FALSE	FALSE	FALSE	FALSE
ENSDARG00000017612	FALSE	FALSE	FALSE	FALSE
ENSDARG00000068214	FALSE	FALSE	FALSE	FALSE
ENSDARG00000110891	FALSE	FALSE	FALSE	FALSE
ENSDARG00000075857	FALSE	FALSE	FALSE	FALSE
ENSDARG00000078611	FALSE	FALSE	FALSE	FALSE
ENSDARG00000114880	FALSE	FALSE	FALSE	FALSE
ENSDARG00000016429	FALSE	FALSE	FALSE	TRUE
ENSDARG00000099407	FALSE	FALSE	FALSE	FALSE
ENSDARG00000109479	FALSE	FALSE	FALSE	FALSE
ENSDARG00000104383	FALSE	FALSE	FALSE	FALSE
ENSDARG00000111857	FALSE	FALSE	FALSE	FALSE
ENSDARG00000060477	FALSE	FALSE	FALSE	FALSE
ENSDARG00000109928	FALSE	FALSE	FALSE	FALSE
ENSDARG00000058357	FALSE	FALSE	FALSE	FALSE
ENSDARG00000101106	FALSE	FALSE	FALSE	FALSE
ENSDARG00000045755	FALSE	FALSE	FALSE	TRUE
ENSDARG00000039501	FALSE	FALSE	FALSE	FALSE
ENSDARG00000035434	FALSE	FALSE	FALSE	FALSE
ENSDARG00000069260	FALSE	FALSE	FALSE	FALSE
ENSDARG00000093350	FALSE	FALSE	FALSE	FALSE
ENSDARG00000105418	FALSE	FALSE	FALSE	FALSE
ENSDARG00000053453	FALSE	FALSE	FALSE	FALSE
ENSDARG00000101949	FALSE	FALSE	FALSE	FALSE
ENSDARG00000053896	FALSE	FALSE	FALSE	TRUE
ENSDARG00000079687	FALSE	FALSE	FALSE	TRUE
ENSDARG00000103774	FALSE	FALSE	FALSE	FALSE
ENSDARG00000075831	FALSE	FALSE	TRUE	TRUE
ENSDARG00000101393	FALSE	FALSE	FALSE	FALSE
ENSDARG00000016904	FALSE	FALSE	FALSE	FALSE
ENSDARG00000030236	FALSE	FALSE	FALSE	FALSE
ENSDARG00000010658	FALSE	TRUE	FALSE	FALSE
ENSDARG00000111187	FALSE	FALSE	FALSE	FALSE
ENSDARG00000097855	FALSE	FALSE	FALSE	FALSE
ENSDARG00000060953	FALSE	FALSE	FALSE	FALSE
ENSDARG00000012138	FALSE	FALSE	FALSE	FALSE
ENSDARG00000025212	FALSE	FALSE	FALSE	FALSE
ENSDARG00000035150	FALSE	TRUE	TRUE	TRUE
ENSDARG00000052300	FALSE	FALSE	FALSE	FALSE
ENSDARG00000115768	FALSE	FALSE	FALSE	FALSE
ENSDARG00000058200	FALSE	FALSE	FALSE	FALSE
ENSDARG00000062326	FALSE	FALSE	FALSE	TRUE
ENSDARG00000033604	FALSE	FALSE	FALSE	FALSE
ENSDARG00000110138	FALSE	FALSE	FALSE	FALSE
ENSDARG00000020345	FALSE	FALSE	FALSE	FALSE
ENSDARG00000106972	FALSE	FALSE	FALSE	FALSE
ENSDARG00000040198	FALSE	FALSE	FALSE	FALSE
ENSDARG00000067676	FALSE	FALSE	FALSE	FALSE
ENSDARG00000025319	FALSE	FALSE	FALSE	FALSE
ENSDARG00000012040	TRUE	FALSE	FALSE	FALSE
ENSDARG00000018069	FALSE	FALSE	FALSE	FALSE
ENSDARG00000013125	FALSE	FALSE	FALSE	FALSE
ENSDARG00000086618	FALSE	FALSE	FALSE	TRUE
ENSDARG00000053817	FALSE	FALSE	FALSE	FALSE
ENSDARG00000074858	FALSE	FALSE	FALSE	FALSE
ENSDARG00000025891	FALSE	FALSE	FALSE	FALSE
ENSDARG00000063375	FALSE	FALSE	FALSE	FALSE
ENSDARG00000033706	FALSE	FALSE	FALSE	FALSE
ENSDARG00000079382	FALSE	FALSE	FALSE	FALSE
ENSDARG00000101037	FALSE	FALSE	FALSE	FALSE
ENSDARG00000084222	FALSE	FALSE	FALSE	FALSE
ENSDARG00000109221	FALSE	FALSE	FALSE	FALSE
ENSDARG00000041607	FALSE	FALSE	FALSE	FALSE
ENSDARG00000099645	FALSE	FALSE	FALSE	FALSE
ENSDARG00000020771	FALSE	FALSE	FALSE	FALSE
ENSDARG00000100944	FALSE	FALSE	FALSE	FALSE
ENSDARG00000004930	FALSE	FALSE	FALSE	TRUE
ENSDARG00000017602	FALSE	FALSE	FALSE	FALSE
ENSDARG00000079420	FALSE	FALSE	FALSE	FALSE
ENSDARG00000020656	FALSE	FALSE	FALSE	FALSE
ENSDARG00000038985	FALSE	FALSE	FALSE	FALSE
ENSDARG00000074506	FALSE	FALSE	FALSE	FALSE
ENSDARG00000045371	FALSE	FALSE	FALSE	TRUE
ENSDARG00000103515	FALSE	FALSE	FALSE	FALSE
ENSDARG00000058992	FALSE	FALSE	FALSE	TRUE
ENSDARG00000044336	FALSE	FALSE	FALSE	FALSE
ENSDARG00000035080	FALSE	FALSE	FALSE	FALSE
ENSDARG00000013207	FALSE	FALSE	FALSE	TRUE
ENSDARG00000010953	FALSE	FALSE	FALSE	FALSE
ENSDARG00000088878	FALSE	FALSE	FALSE	FALSE
ENSDARG00000114437	FALSE	FALSE	FALSE	FALSE
ENSDARG00000007198	FALSE	FALSE	FALSE	TRUE
ENSDARG00000034568	FALSE	FALSE	FALSE	FALSE
ENSDARG00000097373	FALSE	FALSE	FALSE	FALSE
ENSDARG00000094605	FALSE	FALSE	FALSE	FALSE
ENSDARG00000004696	FALSE	FALSE	FALSE	FALSE
ENSDARG00000100703	FALSE	FALSE	FALSE	FALSE
ENSDARG00000009567	FALSE	FALSE	FALSE	FALSE
ENSDARG00000113841	FALSE	FALSE	FALSE	FALSE
ENSDARG00000034503	FALSE	FALSE	FALSE	FALSE
ENSDARG00000098029	FALSE	FALSE	FALSE	FALSE
ENSDARG00000076019	FALSE	FALSE	FALSE	FALSE
ENSDARG00000098911	FALSE	FALSE	FALSE	FALSE
ENSDARG00000040851	FALSE	FALSE	FALSE	FALSE
ENSDARG00000103923	FALSE	FALSE	FALSE	FALSE
ENSDARG00000111421	FALSE	FALSE	FALSE	FALSE
ENSDARG00000104726	FALSE	FALSE	FALSE	FALSE
ENSDARG00000060641	FALSE	FALSE	FALSE	FALSE
ENSDARG00000052695	FALSE	FALSE	FALSE	FALSE
ENSDARG00000108175	FALSE	FALSE	FALSE	FALSE
ENSDARG00000035389	FALSE	FALSE	FALSE	FALSE
ENSDARG00000060004	TRUE	TRUE	TRUE	TRUE
ENSDARG00000110847	FALSE	FALSE	FALSE	FALSE
ENSDARG00000041361	FALSE	FALSE	FALSE	FALSE
ENSDARG00000115154	FALSE	FALSE	FALSE	FALSE
ENSDARG00000116512	FALSE	FALSE	FALSE	FALSE
ENSDARG00000034240	FALSE	FALSE	FALSE	TRUE
ENSDARG00000026875	FALSE	FALSE	FALSE	FALSE
ENSDARG00000113861	FALSE	FALSE	FALSE	FALSE
ENSDARG00000035732	FALSE	FALSE	FALSE	FALSE
ENSDARG00000059646	TRUE	FALSE	TRUE	TRUE
ENSDARG00000102551	FALSE	FALSE	FALSE	FALSE
ENSDARG00000069298	FALSE	FALSE	FALSE	FALSE
ENSDARG00000005814	FALSE	FALSE	FALSE	FALSE
ENSDARG00000114833	FALSE	FALSE	FALSE	FALSE
ENSDARG00000084628	FALSE	FALSE	FALSE	FALSE
ENSDARG00000092660	FALSE	FALSE	FALSE	TRUE
ENSDARG00000027065	FALSE	FALSE	FALSE	FALSE
ENSDARG00000076512	FALSE	FALSE	FALSE	FALSE
ENSDARG00000024471	FALSE	FALSE	FALSE	TRUE
ENSDARG00000105792	FALSE	FALSE	FALSE	FALSE
ENSDARG00000085170	FALSE	FALSE	FALSE	FALSE
ENSDARG00000103668	FALSE	FALSE	FALSE	FALSE
ENSDARG00000082113	FALSE	FALSE	FALSE	FALSE
ENSDARG00000010270	FALSE	FALSE	FALSE	FALSE
ENSDARG00000080205	FALSE	FALSE	FALSE	FALSE
ENSDARG00000028517	FALSE	FALSE	FALSE	FALSE
ENSDARG00000102732	FALSE	FALSE	FALSE	FALSE
ENSDARG00000042018	FALSE	FALSE	FALSE	FALSE
ENSDARG00000053082	FALSE	FALSE	FALSE	FALSE
ENSDARG00000061580	FALSE	FALSE	FALSE	FALSE
ENSDARG00000070677	FALSE	FALSE	FALSE	FALSE
ENSDARG00000110389	FALSE	FALSE	FALSE	FALSE
ENSDARG00000113763	FALSE	FALSE	FALSE	FALSE
ENSDARG00000104767	FALSE	FALSE	FALSE	FALSE
ENSDARG00000103949	FALSE	FALSE	FALSE	FALSE
ENSDARG00000103919	FALSE	FALSE	FALSE	FALSE
ENSDARG00000082530	FALSE	FALSE	FALSE	FALSE
ENSDARG00000100513	FALSE	FALSE	FALSE	FALSE
ENSDARG00000115725	FALSE	FALSE	FALSE	FALSE
ENSDARG00000004789	FALSE	FALSE	FALSE	FALSE
ENSDARG00000012829	FALSE	FALSE	FALSE	FALSE
ENSDARG00000031136	FALSE	FALSE	FALSE	FALSE
ENSDARG00000041407	FALSE	FALSE	FALSE	FALSE
ENSDARG00000077847	FALSE	FALSE	FALSE	FALSE
ENSDARG00000098605	FALSE	FALSE	FALSE	FALSE
ENSDARG00000019362	FALSE	TRUE	FALSE	TRUE
ENSDARG00000035360	FALSE	FALSE	FALSE	FALSE
ENSDARG00000091222	FALSE	FALSE	FALSE	FALSE
ENSDARG00000110052	FALSE	FALSE	FALSE	FALSE
ENSDARG00000077813	FALSE	FALSE	FALSE	FALSE
ENSDARG00000096044	FALSE	FALSE	FALSE	FALSE
ENSDARG00000040838	FALSE	FALSE	FALSE	FALSE
ENSDARG00000010442	FALSE	FALSE	FALSE	FALSE
ENSDARG00000019280	FALSE	FALSE	FALSE	FALSE
ENSDARG00000102572	FALSE	FALSE	FALSE	FALSE
ENSDARG00000024904	FALSE	FALSE	FALSE	FALSE
ENSDARG00000092705	FALSE	FALSE	FALSE	FALSE
ENSDARG00000028625	FALSE	FALSE	FALSE	FALSE
ENSDARG00000038990	FALSE	FALSE	FALSE	FALSE
ENSDARG00000085362	FALSE	FALSE	FALSE	FALSE
ENSDARG00000030914	FALSE	FALSE	FALSE	FALSE
ENSDARG00000053544	FALSE	FALSE	FALSE	FALSE
ENSDARG00000097046	FALSE	FALSE	FALSE	FALSE
ENSDARG00000108367	FALSE	FALSE	FALSE	FALSE
ENSDARG00000026611	FALSE	FALSE	FALSE	FALSE
ENSDARG00000039626	FALSE	FALSE	FALSE	FALSE
ENSDARG00000031494	FALSE	FALSE	FALSE	FALSE
ENSDARG00000058260	FALSE	FALSE	FALSE	FALSE
ENSDARG00000004049	FALSE	FALSE	FALSE	TRUE
ENSDARG00000015314	FALSE	FALSE	FALSE	TRUE
ENSDARG00000020122	FALSE	FALSE	FALSE	FALSE
ENSDARG00000105614	FALSE	FALSE	FALSE	FALSE
ENSDARG00000099445	FALSE	FALSE	FALSE	FALSE
ENSDARG00000078654	FALSE	FALSE	FALSE	FALSE
ENSDARG00000029609	FALSE	FALSE	FALSE	FALSE
ENSDARG00000114677	FALSE	FALSE	FALSE	FALSE
ENSDARG00000069280	FALSE	FALSE	FALSE	FALSE
ENSDARG00000013784	TRUE	FALSE	FALSE	FALSE
ENSDARG00000091932	FALSE	FALSE	FALSE	FALSE
ENSDARG00000042129	FALSE	FALSE	FALSE	FALSE
ENSDARG00000114670	FALSE	FALSE	FALSE	FALSE
ENSDARG00000044492	FALSE	FALSE	FALSE	FALSE
ENSDARG00000110897	FALSE	FALSE	FALSE	FALSE
ENSDARG00000035598	FALSE	FALSE	FALSE	TRUE
ENSDARG00000017624	FALSE	FALSE	TRUE	TRUE
ENSDARG00000092439	FALSE	FALSE	FALSE	FALSE
ENSDARG00000034056	FALSE	FALSE	FALSE	FALSE
ENSDARG00000114360	FALSE	FALSE	FALSE	FALSE
ENSDARG00000077224	FALSE	FALSE	FALSE	FALSE
ENSDARG00000088524	FALSE	FALSE	FALSE	FALSE
ENSDARG00000084772	FALSE	FALSE	FALSE	FALSE
ENSDARG00000096797	FALSE	FALSE	FALSE	FALSE
ENSDARG00000003032	FALSE	FALSE	FALSE	FALSE
ENSDARG00000112400	FALSE	FALSE	FALSE	FALSE
ENSDARG00000038239	FALSE	FALSE	FALSE	TRUE
ENSDARG00000113950	FALSE	FALSE	FALSE	FALSE
ENSDARG00000104973	FALSE	FALSE	FALSE	FALSE
ENSDARG00000003169	FALSE	FALSE	FALSE	TRUE
ENSDARG00000097953	FALSE	FALSE	FALSE	FALSE
ENSDARG00000074087	FALSE	FALSE	FALSE	FALSE
ENSDARG00000021113	FALSE	FALSE	FALSE	FALSE
ENSDARG00000104805	FALSE	FALSE	FALSE	FALSE
ENSDARG00000113665	FALSE	FALSE	FALSE	FALSE
ENSDARG00000041215	FALSE	FALSE	FALSE	FALSE
ENSDARG00000011027	FALSE	FALSE	FALSE	FALSE
ENSDARG00000007257	FALSE	FALSE	FALSE	FALSE
ENSDARG00000007179	FALSE	FALSE	FALSE	FALSE
ENSDARG00000097567	FALSE	FALSE	FALSE	FALSE
ENSDARG00000115512	FALSE	FALSE	FALSE	FALSE
ENSDARG00000103004	FALSE	FALSE	FALSE	FALSE
ENSDARG00000018426	FALSE	FALSE	FALSE	FALSE
ENSDARG00000110846	FALSE	FALSE	FALSE	FALSE
ENSDARG00000098119	FALSE	FALSE	FALSE	FALSE
ENSDARG00000060559	FALSE	FALSE	FALSE	TRUE
ENSDARG00000057529	FALSE	FALSE	FALSE	FALSE
ENSDARG00000057683	FALSE	FALSE	FALSE	TRUE
ENSDARG00000054619	FALSE	FALSE	FALSE	FALSE
ENSDARG00000113929	FALSE	FALSE	FALSE	FALSE
ENSDARG00000069030	FALSE	FALSE	FALSE	FALSE
ENSDARG00000103384	FALSE	FALSE	FALSE	FALSE
ENSDARG00000101251	FALSE	FALSE	FALSE	FALSE
ENSDARG00000037574	FALSE	FALSE	FALSE	FALSE
ENSDARG00000078317	FALSE	FALSE	FALSE	FALSE
ENSDARG00000080641	FALSE	FALSE	FALSE	FALSE
ENSDARG00000045596	FALSE	FALSE	FALSE	FALSE
ENSDARG00000100871	FALSE	FALSE	FALSE	FALSE
ENSDARG00000092119	FALSE	FALSE	FALSE	FALSE
ENSDARG00000043260	FALSE	FALSE	FALSE	FALSE
ENSDARG00000089159	FALSE	FALSE	FALSE	FALSE
ENSDARG00000078095	FALSE	FALSE	FALSE	FALSE
ENSDARG00000068096	FALSE	FALSE	FALSE	FALSE
ENSDARG00000094509	FALSE	FALSE	FALSE	FALSE
ENSDARG00000045413	FALSE	FALSE	FALSE	FALSE
ENSDARG00000054186	FALSE	FALSE	FALSE	FALSE
ENSDARG00000111708	FALSE	FALSE	FALSE	FALSE
ENSDARG00000086484	FALSE	FALSE	FALSE	FALSE
ENSDARG00000078640	FALSE	FALSE	FALSE	FALSE
ENSDARG00000091835	FALSE	FALSE	FALSE	FALSE
ENSDARG00000025468	FALSE	FALSE	FALSE	FALSE
ENSDARG00000031968	FALSE	FALSE	FALSE	FALSE
ENSDARG00000039117	FALSE	FALSE	FALSE	FALSE
ENSDARG00000075461	FALSE	FALSE	FALSE	FALSE
ENSDARG00000096761	FALSE	FALSE	FALSE	FALSE
ENSDARG00000007130	FALSE	FALSE	FALSE	TRUE
ENSDARG00000007184	FALSE	FALSE	FALSE	FALSE
ENSDARG00000041728	FALSE	FALSE	FALSE	FALSE
ENSDARG00000059653	FALSE	FALSE	FALSE	FALSE
ENSDARG00000058801	FALSE	FALSE	FALSE	FALSE
ENSDARG00000035540	FALSE	FALSE	FALSE	FALSE
ENSDARG00000095267	FALSE	FALSE	FALSE	FALSE
ENSDARG00000083588	FALSE	FALSE	FALSE	FALSE
ENSDARG00000102171	FALSE	FALSE	FALSE	FALSE
ENSDARG00000079308	FALSE	FALSE	FALSE	FALSE
ENSDARG00000078518	FALSE	FALSE	FALSE	FALSE
ENSDARG00000056515	FALSE	FALSE	FALSE	FALSE
ENSDARG00000096569	FALSE	FALSE	FALSE	FALSE
ENSDARG00000068344	FALSE	FALSE	FALSE	FALSE
ENSDARG00000110080	FALSE	FALSE	FALSE	FALSE
ENSDARG00000057096	FALSE	TRUE	FALSE	FALSE
ENSDARG00000055722	FALSE	FALSE	FALSE	FALSE
ENSDARG00000029124	FALSE	FALSE	FALSE	FALSE
ENSDARG00000099431	FALSE	FALSE	FALSE	FALSE
ENSDARG00000017811	FALSE	FALSE	FALSE	FALSE
ENSDARG00000094025	FALSE	FALSE	FALSE	FALSE
ENSDARG00000006038	FALSE	FALSE	FALSE	TRUE
ENSDARG00000069589	FALSE	FALSE	FALSE	FALSE
ENSDARG00000003257	FALSE	FALSE	FALSE	FALSE
ENSDARG00000091992	FALSE	FALSE	FALSE	FALSE
ENSDARG00000109951	FALSE	FALSE	FALSE	FALSE
ENSDARG00000008255	FALSE	FALSE	FALSE	TRUE
ENSDARG00000112757	FALSE	FALSE	FALSE	FALSE
ENSDARG00000076699	FALSE	FALSE	FALSE	FALSE
ENSDARG00000011851	FALSE	FALSE	FALSE	FALSE
ENSDARG00000030871	FALSE	FALSE	FALSE	FALSE
ENSDARG00000112166	FALSE	FALSE	FALSE	FALSE
ENSDARG00000099705	FALSE	FALSE	FALSE	FALSE
ENSDARG00000093597	FALSE	FALSE	FALSE	FALSE
ENSDARG00000056034	FALSE	FALSE	FALSE	FALSE
ENSDARG00000093232	FALSE	FALSE	FALSE	FALSE
ENSDARG00000117206	FALSE	FALSE	FALSE	FALSE
ENSDARG00000042545	FALSE	FALSE	FALSE	FALSE
ENSDARG00000067831	FALSE	FALSE	FALSE	FALSE
ENSDARG00000103647	FALSE	FALSE	FALSE	FALSE
ENSDARG00000112859	FALSE	FALSE	FALSE	FALSE
ENSDARG00000020887	FALSE	FALSE	FALSE	FALSE
ENSDARG00000025641	FALSE	FALSE	FALSE	FALSE
ENSDARG00000053912	FALSE	FALSE	FALSE	TRUE
ENSDARG00000102579	FALSE	FALSE	FALSE	FALSE
ENSDARG00000090847	FALSE	FALSE	FALSE	FALSE
ENSDARG00000114570	FALSE	FALSE	FALSE	FALSE
ENSDARG00000099943	FALSE	FALSE	FALSE	FALSE
ENSDARG00000003098	FALSE	FALSE	FALSE	FALSE
ENSDARG00000014545	FALSE	FALSE	FALSE	FALSE
ENSDARG00000015829	FALSE	FALSE	FALSE	FALSE
ENSDARG00000079578	FALSE	FALSE	FALSE	FALSE
ENSDARG00000079626	FALSE	FALSE	FALSE	FALSE
ENSDARG00000117183	FALSE	FALSE	FALSE	FALSE
ENSDARG00000112834	FALSE	FALSE	FALSE	FALSE
ENSDARG00000092346	FALSE	FALSE	FALSE	FALSE
ENSDARG00000017803	FALSE	FALSE	FALSE	FALSE
ENSDARG00000032103	FALSE	FALSE	FALSE	FALSE
ENSDARG00000062812	FALSE	FALSE	FALSE	FALSE
ENSDARG00000055855	FALSE	FALSE	FALSE	FALSE
ENSDARG00000029615	FALSE	FALSE	FALSE	FALSE
ENSDARG00000020764	FALSE	FALSE	FALSE	FALSE
ENSDARG00000040021	FALSE	FALSE	FALSE	FALSE
ENSDARG00000036987	TRUE	FALSE	TRUE	TRUE
ENSDARG00000092893	FALSE	FALSE	FALSE	FALSE
ENSDARG00000055543	FALSE	FALSE	FALSE	FALSE
ENSDARG00000098924	FALSE	FALSE	FALSE	FALSE
ENSDARG00000077107	FALSE	FALSE	FALSE	FALSE
ENSDARG00000054252	FALSE	FALSE	FALSE	FALSE
ENSDARG00000105616	FALSE	FALSE	FALSE	FALSE
ENSDARG00000037097	FALSE	FALSE	FALSE	FALSE
ENSDARG00000042484	FALSE	FALSE	FALSE	FALSE
ENSDARG00000108953	FALSE	FALSE	FALSE	FALSE
ENSDARG00000110523	FALSE	FALSE	FALSE	FALSE
ENSDARG00000015176	FALSE	FALSE	FALSE	FALSE
ENSDARG00000027041	FALSE	FALSE	FALSE	FALSE
ENSDARG00000078541	FALSE	FALSE	FALSE	FALSE
ENSDARG00000078502	FALSE	FALSE	FALSE	FALSE
ENSDARG00000070681	FALSE	FALSE	FALSE	FALSE
ENSDARG00000102911	FALSE	FALSE	FALSE	FALSE
ENSDARG00000015472	FALSE	FALSE	FALSE	TRUE
ENSDARG00000035324	FALSE	TRUE	FALSE	TRUE
ENSDARG00000028539	FALSE	FALSE	FALSE	TRUE
ENSDARG00000022319	FALSE	FALSE	FALSE	FALSE
ENSDARG00000110337	FALSE	FALSE	FALSE	FALSE
ENSDARG00000056453	FALSE	FALSE	FALSE	FALSE
ENSDARG00000089088	FALSE	FALSE	FALSE	FALSE
ENSDARG00000008480	FALSE	FALSE	FALSE	FALSE
ENSDARG00000076189	FALSE	FALSE	FALSE	FALSE
ENSDARG00000099199	FALSE	FALSE	FALSE	FALSE
ENSDARG00000024209	FALSE	FALSE	FALSE	TRUE
ENSDARG00000109421	FALSE	FALSE	FALSE	FALSE
ENSDARG00000104793	FALSE	FALSE	FALSE	FALSE
ENSDARG00000062146	FALSE	FALSE	FALSE	TRUE
ENSDARG00000099673	FALSE	FALSE	FALSE	FALSE
ENSDARG00000052789	FALSE	FALSE	FALSE	FALSE
ENSDARG00000061654	FALSE	FALSE	FALSE	FALSE
ENSDARG00000098768	FALSE	FALSE	FALSE	FALSE
ENSDARG00000117062	FALSE	FALSE	FALSE	FALSE
ENSDARG00000078001	FALSE	FALSE	FALSE	FALSE
ENSDARG00000000729	FALSE	FALSE	FALSE	TRUE
ENSDARG00000062000	FALSE	FALSE	FALSE	TRUE
ENSDARG00000023683	FALSE	FALSE	FALSE	FALSE
ENSDARG00000074229	FALSE	FALSE	FALSE	FALSE
ENSDARG00000033012	FALSE	FALSE	FALSE	FALSE
ENSDARG00000040778	FALSE	FALSE	FALSE	FALSE
ENSDARG00000117208	FALSE	FALSE	FALSE	FALSE
ENSDARG00000097372	FALSE	FALSE	FALSE	FALSE
ENSDARG00000097461	FALSE	FALSE	FALSE	FALSE
ENSDARG00000078267	FALSE	FALSE	FALSE	FALSE
ENSDARG00000055295	FALSE	FALSE	FALSE	FALSE
ENSDARG00000075282	FALSE	FALSE	FALSE	FALSE
ENSDARG00000100741	FALSE	FALSE	FALSE	FALSE
ENSDARG00000061195	FALSE	FALSE	FALSE	FALSE
ENSDARG00000012981	FALSE	FALSE	FALSE	FALSE
ENSDARG00000097742	FALSE	FALSE	FALSE	FALSE
ENSDARG00000098433	FALSE	FALSE	FALSE	FALSE
ENSDARG00000076563	FALSE	FALSE	FALSE	FALSE
ENSDARG00000111586	FALSE	FALSE	FALSE	FALSE
ENSDARG00000017901	FALSE	FALSE	FALSE	TRUE
ENSDARG00000015072	FALSE	FALSE	FALSE	FALSE
ENSDARG00000069425	FALSE	FALSE	FALSE	FALSE
ENSDARG00000034270	FALSE	FALSE	FALSE	FALSE
ENSDARG00000062448	FALSE	FALSE	FALSE	FALSE
ENSDARG00000100956	FALSE	FALSE	FALSE	FALSE
ENSDARG00000061391	FALSE	FALSE	FALSE	FALSE
ENSDARG00000062753	FALSE	FALSE	FALSE	FALSE
ENSDARG00000069133	FALSE	FALSE	FALSE	FALSE
ENSDARG00000058740	FALSE	FALSE	FALSE	FALSE
ENSDARG00000020332	FALSE	FALSE	FALSE	FALSE
ENSDARG00000105013	FALSE	FALSE	FALSE	FALSE
ENSDARG00000089076	FALSE	FALSE	FALSE	FALSE
ENSDARG00000074274	FALSE	FALSE	FALSE	FALSE
ENSDARG00000020101	FALSE	FALSE	FALSE	FALSE
ENSDARG00000038066	FALSE	FALSE	FALSE	FALSE
ENSDARG00000040695	FALSE	FALSE	FALSE	FALSE
ENSDARG00000010246	FALSE	FALSE	FALSE	TRUE
ENSDARG00000033099	FALSE	FALSE	FALSE	FALSE
ENSDARG00000009922	FALSE	FALSE	FALSE	FALSE
ENSDARG00000075269	FALSE	FALSE	FALSE	FALSE
ENSDARG00000109530	FALSE	FALSE	FALSE	FALSE
ENSDARG00000010905	FALSE	FALSE	FALSE	FALSE
ENSDARG00000053456	FALSE	FALSE	FALSE	FALSE
ENSDARG00000003270	FALSE	FALSE	FALSE	FALSE
ENSDARG00000020086	FALSE	FALSE	FALSE	TRUE
ENSDARG00000059983	FALSE	FALSE	FALSE	FALSE
ENSDARG00000069698	FALSE	FALSE	FALSE	FALSE
ENSDARG00000020219	FALSE	TRUE	FALSE	TRUE
ENSDARG00000099315	FALSE	FALSE	FALSE	FALSE
ENSDARG00000096878	FALSE	FALSE	FALSE	FALSE
ENSDARG00000099355	FALSE	FALSE	FALSE	FALSE
ENSDARG00000093348	FALSE	FALSE	FALSE	FALSE
ENSDARG00000081841	FALSE	FALSE	FALSE	FALSE
ENSDARG00000007081	FALSE	FALSE	FALSE	FALSE
ENSDARG00000097817	FALSE	FALSE	FALSE	FALSE
ENSDARG00000112250	FALSE	FALSE	FALSE	FALSE
ENSDARG00000054076	FALSE	FALSE	FALSE	FALSE
ENSDARG00000052646	FALSE	FALSE	FALSE	FALSE
ENSDARG00000100515	FALSE	FALSE	FALSE	FALSE
ENSDARG00000037488	FALSE	FALSE	FALSE	FALSE
ENSDARG00000018914	FALSE	FALSE	FALSE	TRUE
ENSDARG00000081284	FALSE	FALSE	FALSE	FALSE
ENSDARG00000012574	FALSE	FALSE	FALSE	TRUE
ENSDARG00000019595	FALSE	FALSE	FALSE	FALSE
ENSDARG00000012449	FALSE	FALSE	FALSE	FALSE
ENSDARG00000053087	FALSE	FALSE	FALSE	FALSE
ENSDARG00000018985	FALSE	FALSE	FALSE	TRUE
ENSDARG00000004697	FALSE	FALSE	FALSE	FALSE
ENSDARG00000078578	FALSE	FALSE	FALSE	FALSE
ENSDARG00000042030	FALSE	FALSE	FALSE	FALSE
ENSDARG00000100906	FALSE	FALSE	FALSE	FALSE
ENSDARG00000113010	FALSE	FALSE	FALSE	FALSE
ENSDARG00000074519	FALSE	FALSE	FALSE	FALSE
ENSDARG00000109703	FALSE	FALSE	FALSE	FALSE
ENSDARG00000075567	FALSE	FALSE	FALSE	FALSE
ENSDARG00000101062	FALSE	FALSE	FALSE	FALSE
ENSDARG00000044847	FALSE	FALSE	FALSE	FALSE
ENSDARG00000094729	TRUE	TRUE	TRUE	TRUE
ENSDARG00000006773	FALSE	FALSE	FALSE	FALSE
ENSDARG00000070441	FALSE	FALSE	FALSE	FALSE
ENSDARG00000104517	FALSE	FALSE	FALSE	FALSE
ENSDARG00000039229	FALSE	FALSE	FALSE	FALSE
ENSDARG00000042045	FALSE	FALSE	FALSE	FALSE
ENSDARG00000038089	FALSE	FALSE	FALSE	FALSE
ENSDARG00000110916	FALSE	FALSE	FALSE	FALSE
ENSDARG00000018351	FALSE	FALSE	FALSE	FALSE
ENSDARG00000061039	FALSE	FALSE	FALSE	TRUE
ENSDARG00000114802	FALSE	FALSE	FALSE	FALSE
ENSDARG00000036305	FALSE	FALSE	FALSE	FALSE
ENSDARG00000108340	FALSE	FALSE	FALSE	FALSE
ENSDARG00000037473	FALSE	FALSE	FALSE	FALSE
ENSDARG00000042725	FALSE	FALSE	FALSE	FALSE
ENSDARG00000117295	FALSE	FALSE	FALSE	FALSE
ENSDARG00000054320	FALSE	FALSE	FALSE	TRUE
ENSDARG00000092539	FALSE	FALSE	FALSE	FALSE
ENSDARG00000076960	FALSE	FALSE	FALSE	FALSE
ENSDARG00000045373	FALSE	FALSE	FALSE	TRUE
ENSDARG00000016968	FALSE	FALSE	FALSE	FALSE
ENSDARG00000074892	FALSE	FALSE	FALSE	FALSE
ENSDARG00000056307	FALSE	FALSE	FALSE	FALSE
ENSDARG00000020693	TRUE	FALSE	FALSE	FALSE
ENSDARG00000062501	FALSE	FALSE	FALSE	FALSE
ENSDARG00000035433	FALSE	FALSE	FALSE	FALSE
ENSDARG00000083189	FALSE	FALSE	FALSE	FALSE
ENSDARG00000079361	FALSE	FALSE	FALSE	FALSE
ENSDARG00000070213	FALSE	FALSE	FALSE	FALSE
ENSDARG00000095993	FALSE	FALSE	FALSE	FALSE
ENSDARG00000015678	FALSE	FALSE	FALSE	FALSE
ENSDARG00000099430	FALSE	FALSE	FALSE	FALSE
ENSDARG00000078734	FALSE	FALSE	FALSE	FALSE
ENSDARG00000061789	FALSE	FALSE	FALSE	FALSE
ENSDARG00000013615	FALSE	FALSE	FALSE	FALSE
ENSDARG00000056830	FALSE	FALSE	FALSE	FALSE
ENSDARG00000045936	FALSE	FALSE	FALSE	FALSE
ENSDARG00000110160	FALSE	FALSE	FALSE	FALSE
ENSDARG00000113020	FALSE	FALSE	FALSE	FALSE
ENSDARG00000040490	FALSE	FALSE	FALSE	FALSE
ENSDARG00000094016	FALSE	FALSE	FALSE	FALSE
ENSDARG00000026654	FALSE	FALSE	FALSE	FALSE
ENSDARG00000059279	FALSE	TRUE	FALSE	FALSE
ENSDARG00000096668	FALSE	FALSE	FALSE	FALSE
ENSDARG00000062137	FALSE	FALSE	FALSE	TRUE
ENSDARG00000001154	FALSE	FALSE	FALSE	FALSE
ENSDARG00000063177	FALSE	FALSE	FALSE	FALSE
ENSDARG00000111032	FALSE	FALSE	FALSE	FALSE
ENSDARG00000060662	FALSE	FALSE	FALSE	FALSE
ENSDARG00000033901	FALSE	FALSE	FALSE	FALSE
ENSDARG00000006125	FALSE	FALSE	FALSE	TRUE
ENSDARG00000044093	FALSE	TRUE	FALSE	TRUE
ENSDARG00000111980	FALSE	FALSE	FALSE	FALSE
ENSDARG00000112038	FALSE	FALSE	FALSE	FALSE
ENSDARG00000001968	FALSE	FALSE	FALSE	FALSE
ENSDARG00000105578	FALSE	FALSE	FALSE	FALSE
ENSDARG00000087893	FALSE	FALSE	FALSE	FALSE
ENSDARG00000024687	FALSE	FALSE	FALSE	FALSE
ENSDARG00000059327	FALSE	TRUE	FALSE	FALSE
ENSDARG00000037393	FALSE	FALSE	FALSE	TRUE
ENSDARG00000042510	FALSE	FALSE	FALSE	FALSE
ENSDARG00000094128	FALSE	FALSE	FALSE	FALSE
ENSDARG00000106551	FALSE	FALSE	FALSE	FALSE
ENSDARG00000067564	FALSE	FALSE	FALSE	FALSE
ENSDARG00000074747	FALSE	FALSE	FALSE	FALSE
ENSDARG00000008131	FALSE	FALSE	FALSE	FALSE
ENSDARG00000092124	FALSE	FALSE	FALSE	FALSE
ENSDARG00000035650	FALSE	FALSE	FALSE	FALSE
ENSDARG00000056111	FALSE	FALSE	FALSE	FALSE
ENSDARG00000059280	FALSE	FALSE	FALSE	FALSE
ENSDARG00000039412	FALSE	FALSE	FALSE	FALSE
ENSDARG00000113401	FALSE	FALSE	FALSE	FALSE
ENSDARG00000081931	FALSE	FALSE	FALSE	FALSE
ENSDARG00000113563	FALSE	FALSE	FALSE	FALSE
ENSDARG00000102120	FALSE	FALSE	FALSE	FALSE
ENSDARG00000079616	FALSE	FALSE	FALSE	FALSE
ENSDARG00000004539	FALSE	FALSE	FALSE	TRUE
ENSDARG00000115301	FALSE	FALSE	FALSE	FALSE
ENSDARG00000095149	FALSE	FALSE	FALSE	FALSE
ENSDARG00000110249	FALSE	FALSE	FALSE	FALSE
ENSDARG00000098288	FALSE	FALSE	FALSE	FALSE
ENSDARG00000056138	FALSE	FALSE	FALSE	TRUE
ENSDARG00000079977	FALSE	FALSE	FALSE	TRUE
ENSDARG00000025555	FALSE	FALSE	FALSE	FALSE
ENSDARG00000056856	FALSE	FALSE	FALSE	FALSE
ENSDARG00000060808	FALSE	FALSE	FALSE	TRUE
ENSDARG00000012002	FALSE	FALSE	FALSE	TRUE
ENSDARG00000012632	FALSE	FALSE	FALSE	FALSE
ENSDARG00000054400	FALSE	FALSE	FALSE	FALSE
ENSDARG00000029928	FALSE	FALSE	FALSE	FALSE
ENSDARG00000033539	TRUE	TRUE	FALSE	TRUE
ENSDARG00000095715	FALSE	FALSE	FALSE	FALSE
ENSDARG00000096239	FALSE	FALSE	FALSE	FALSE
ENSDARG00000010070	FALSE	FALSE	FALSE	FALSE
ENSDARG00000099220	FALSE	FALSE	FALSE	FALSE
ENSDARG00000112338	FALSE	FALSE	FALSE	FALSE
ENSDARG00000059209	FALSE	FALSE	FALSE	FALSE
ENSDARG00000069595	FALSE	FALSE	TRUE	TRUE
ENSDARG00000109244	FALSE	FALSE	FALSE	FALSE
ENSDARG00000028541	FALSE	FALSE	FALSE	FALSE
ENSDARG00000033666	FALSE	FALSE	FALSE	FALSE
ENSDARG00000100400	FALSE	FALSE	FALSE	FALSE
ENSDARG00000062721	FALSE	FALSE	FALSE	FALSE
ENSDARG00000001890	FALSE	FALSE	FALSE	FALSE
ENSDARG00000063390	FALSE	FALSE	FALSE	FALSE
ENSDARG00000104154	FALSE	FALSE	FALSE	FALSE
ENSDARG00000041896	FALSE	FALSE	FALSE	TRUE
ENSDARG00000058996	FALSE	FALSE	FALSE	FALSE
ENSDARG00000003642	FALSE	FALSE	FALSE	FALSE
ENSDARG00000097146	FALSE	FALSE	FALSE	FALSE
ENSDARG00000086055	FALSE	FALSE	FALSE	FALSE
ENSDARG00000037739	FALSE	FALSE	FALSE	FALSE
ENSDARG00000040046	TRUE	TRUE	TRUE	TRUE
ENSDARG00000077047	FALSE	FALSE	FALSE	FALSE
ENSDARG00000095482	FALSE	FALSE	FALSE	FALSE
ENSDARG00000057867	FALSE	FALSE	FALSE	FALSE
ENSDARG00000017220	FALSE	FALSE	FALSE	FALSE
ENSDARG00000069014	FALSE	FALSE	FALSE	FALSE
ENSDARG00000021021	FALSE	FALSE	FALSE	FALSE
ENSDARG00000080924	FALSE	FALSE	FALSE	FALSE
ENSDARG00000063330	FALSE	FALSE	FALSE	FALSE
ENSDARG00000021250	FALSE	FALSE	FALSE	FALSE
ENSDARG00000005015	FALSE	FALSE	FALSE	FALSE
ENSDARG00000116479	FALSE	FALSE	FALSE	FALSE
ENSDARG00000053813	FALSE	FALSE	FALSE	FALSE
ENSDARG00000053222	FALSE	FALSE	FALSE	FALSE
ENSDARG00000039406	FALSE	FALSE	FALSE	FALSE
ENSDARG00000010641	FALSE	FALSE	FALSE	TRUE
ENSDARG00000016725	FALSE	FALSE	FALSE	FALSE
ENSDARG00000113921	FALSE	FALSE	FALSE	FALSE
ENSDARG00000006598	FALSE	FALSE	FALSE	FALSE
ENSDARG00000074927	FALSE	FALSE	FALSE	TRUE
ENSDARG00000111622	FALSE	FALSE	FALSE	FALSE
ENSDARG00000016128	FALSE	FALSE	FALSE	FALSE
ENSDARG00000099837	FALSE	FALSE	FALSE	FALSE
ENSDARG00000056112	FALSE	FALSE	FALSE	FALSE
ENSDARG00000093696	FALSE	FALSE	FALSE	FALSE
ENSDARG00000089326	FALSE	FALSE	FALSE	FALSE
ENSDARG00000042293	FALSE	FALSE	FALSE	FALSE
ENSDARG00000078308	FALSE	FALSE	FALSE	FALSE
ENSDARG00000099273	FALSE	FALSE	FALSE	FALSE
ENSDARG00000115335	FALSE	FALSE	FALSE	FALSE
ENSDARG00000116472	FALSE	FALSE	FALSE	FALSE
ENSDARG00000004452	FALSE	TRUE	FALSE	TRUE
ENSDARG00000017569	FALSE	FALSE	FALSE	FALSE
ENSDARG00000053625	FALSE	FALSE	FALSE	TRUE
ENSDARG00000042815	FALSE	FALSE	FALSE	FALSE
ENSDARG00000077860	FALSE	FALSE	FALSE	FALSE
ENSDARG00000109367	FALSE	FALSE	FALSE	FALSE
ENSDARG00000033489	FALSE	FALSE	FALSE	FALSE
ENSDARG00000101859	FALSE	FALSE	FALSE	FALSE
ENSDARG00000094155	FALSE	FALSE	FALSE	FALSE
ENSDARG00000096667	FALSE	FALSE	FALSE	FALSE
ENSDARG00000105285	FALSE	FALSE	FALSE	FALSE
ENSDARG00000019013	FALSE	FALSE	FALSE	FALSE
ENSDARG00000016706	FALSE	FALSE	FALSE	FALSE
ENSDARG00000111830	FALSE	FALSE	FALSE	FALSE
ENSDARG00000103980	FALSE	FALSE	FALSE	FALSE
ENSDARG00000074575	FALSE	FALSE	FALSE	TRUE
ENSDARG00000103728	FALSE	FALSE	FALSE	FALSE
ENSDARG00000116492	FALSE	FALSE	FALSE	FALSE
ENSDARG00000028628	FALSE	FALSE	FALSE	FALSE
ENSDARG00000086826	FALSE	FALSE	FALSE	TRUE
ENSDARG00000070046	FALSE	FALSE	FALSE	TRUE
ENSDARG00000076486	FALSE	FALSE	FALSE	FALSE
ENSDARG00000019924	FALSE	FALSE	FALSE	FALSE
ENSDARG00000044511	FALSE	FALSE	FALSE	TRUE
ENSDARG00000055151	FALSE	FALSE	FALSE	FALSE
ENSDARG00000101171	FALSE	FALSE	FALSE	FALSE
ENSDARG00000113085	FALSE	FALSE	FALSE	FALSE
ENSDARG00000061473	FALSE	FALSE	FALSE	FALSE
ENSDARG00000113272	FALSE	FALSE	FALSE	FALSE
ENSDARG00000112614	FALSE	FALSE	FALSE	FALSE
ENSDARG00000097731	FALSE	FALSE	FALSE	FALSE
ENSDARG00000104542	FALSE	FALSE	FALSE	FALSE
ENSDARG00000078078	FALSE	FALSE	FALSE	FALSE
ENSDARG00000015887	FALSE	FALSE	FALSE	FALSE
ENSDARG00000116159	FALSE	FALSE	FALSE	FALSE
ENSDARG00000006553	FALSE	FALSE	FALSE	FALSE
ENSDARG00000085130	FALSE	FALSE	FALSE	FALSE
ENSDARG00000101064	FALSE	FALSE	FALSE	FALSE
ENSDARG00000028552	FALSE	FALSE	FALSE	FALSE
ENSDARG00000101130	FALSE	FALSE	FALSE	FALSE
ENSDARG00000069105	TRUE	TRUE	TRUE	TRUE
ENSDARG00000103400	FALSE	FALSE	FALSE	FALSE
ENSDARG00000070081	FALSE	FALSE	FALSE	FALSE
ENSDARG00000060687	FALSE	FALSE	FALSE	FALSE
ENSDARG00000005220	FALSE	FALSE	FALSE	FALSE
ENSDARG00000025436	FALSE	FALSE	FALSE	FALSE
ENSDARG00000076923	FALSE	FALSE	FALSE	FALSE
ENSDARG00000095002	FALSE	FALSE	FALSE	FALSE
ENSDARG00000112813	FALSE	FALSE	FALSE	FALSE
ENSDARG00000099637	FALSE	FALSE	FALSE	FALSE
ENSDARG00000009733	FALSE	FALSE	FALSE	FALSE
ENSDARG00000095214	FALSE	FALSE	FALSE	FALSE
ENSDARG00000115540	FALSE	FALSE	FALSE	FALSE
ENSDARG00000069703	FALSE	FALSE	FALSE	FALSE
ENSDARG00000099812	FALSE	FALSE	FALSE	FALSE
ENSDARG00000109383	FALSE	FALSE	FALSE	FALSE
ENSDARG00000096210	TRUE	FALSE	FALSE	TRUE
ENSDARG00000113820	FALSE	FALSE	FALSE	FALSE
ENSDARG00000023330	TRUE	FALSE	TRUE	TRUE
ENSDARG00000099898	FALSE	FALSE	FALSE	FALSE
ENSDARG00000032651	FALSE	TRUE	FALSE	FALSE
ENSDARG00000070710	FALSE	FALSE	FALSE	FALSE
ENSDARG00000041750	FALSE	FALSE	FALSE	FALSE
ENSDARG00000107642	FALSE	FALSE	FALSE	FALSE
ENSDARG00000035048	FALSE	FALSE	FALSE	FALSE
ENSDARG00000102906	FALSE	FALSE	FALSE	FALSE
ENSDARG00000087165	FALSE	FALSE	FALSE	FALSE
ENSDARG00000010051	FALSE	FALSE	FALSE	FALSE
ENSDARG00000059978	FALSE	FALSE	FALSE	FALSE
ENSDARG00000040881	FALSE	FALSE	FALSE	FALSE
ENSDARG00000088222	FALSE	FALSE	FALSE	FALSE
ENSDARG00000040815	FALSE	FALSE	FALSE	TRUE
ENSDARG00000089432	FALSE	FALSE	FALSE	FALSE
ENSDARG00000081799	FALSE	FALSE	FALSE	FALSE
ENSDARG00000009336	FALSE	FALSE	FALSE	TRUE
ENSDARG00000040432	TRUE	TRUE	FALSE	FALSE
ENSDARG00000003219	FALSE	FALSE	FALSE	FALSE
ENSDARG00000036279	FALSE	FALSE	FALSE	TRUE
ENSDARG00000095619	FALSE	FALSE	FALSE	FALSE
ENSDARG00000117750	FALSE	FALSE	FALSE	FALSE
ENSDARG00000068409	TRUE	FALSE	TRUE	FALSE
ENSDARG00000075931	FALSE	FALSE	FALSE	FALSE
ENSDARG00000055876	FALSE	FALSE	FALSE	FALSE
ENSDARG00000044532	FALSE	FALSE	FALSE	FALSE
ENSDARG00000082778	FALSE	FALSE	FALSE	FALSE
ENSDARG00000019417	TRUE	TRUE	FALSE	TRUE
ENSDARG00000097873	FALSE	FALSE	FALSE	FALSE
ENSDARG00000071497	FALSE	FALSE	TRUE	TRUE
ENSDARG00000097579	FALSE	FALSE	FALSE	FALSE
ENSDARG00000101718	FALSE	FALSE	FALSE	FALSE
ENSDARG00000057987	FALSE	FALSE	FALSE	FALSE
ENSDARG00000110266	FALSE	FALSE	FALSE	FALSE
ENSDARG00000115808	FALSE	FALSE	FALSE	FALSE
ENSDARG00000092499	FALSE	FALSE	FALSE	FALSE
ENSDARG00000081580	FALSE	FALSE	FALSE	FALSE
ENSDARG00000076836	FALSE	FALSE	FALSE	TRUE
ENSDARG00000027461	FALSE	FALSE	FALSE	FALSE
ENSDARG00000021483	FALSE	FALSE	FALSE	FALSE
ENSDARG00000111938	FALSE	FALSE	FALSE	FALSE
ENSDARG00000076865	FALSE	FALSE	FALSE	FALSE
ENSDARG00000098984	FALSE	FALSE	FALSE	FALSE
ENSDARG00000026829	FALSE	FALSE	FALSE	FALSE
ENSDARG00000112580	FALSE	FALSE	FALSE	FALSE
ENSDARG00000036344	FALSE	FALSE	FALSE	FALSE
ENSDARG00000089368	FALSE	FALSE	FALSE	FALSE
ENSDARG00000094171	FALSE	FALSE	FALSE	FALSE
ENSDARG00000037018	FALSE	FALSE	FALSE	FALSE
ENSDARG00000016112	FALSE	FALSE	FALSE	FALSE
ENSDARG00000076182	FALSE	FALSE	FALSE	FALSE
ENSDARG00000036967	FALSE	FALSE	FALSE	FALSE
ENSDARG00000076153	FALSE	FALSE	FALSE	FALSE
ENSDARG00000039299	FALSE	FALSE	FALSE	FALSE
ENSDARG00000019060	FALSE	FALSE	FALSE	TRUE
ENSDARG00000023323	FALSE	FALSE	FALSE	FALSE
ENSDARG00000097621	FALSE	FALSE	FALSE	FALSE
ENSDARG00000010556	FALSE	FALSE	FALSE	FALSE
ENSDARG00000025013	FALSE	FALSE	FALSE	FALSE
ENSDARG00000105479	FALSE	FALSE	FALSE	FALSE
ENSDARG00000016749	FALSE	FALSE	FALSE	FALSE
ENSDARG00000057006	FALSE	FALSE	FALSE	FALSE
ENSDARG00000052700	FALSE	FALSE	FALSE	FALSE
ENSDARG00000005368	FALSE	FALSE	FALSE	FALSE
ENSDARG00000100162	FALSE	FALSE	FALSE	FALSE
ENSDARG00000060941	FALSE	FALSE	FALSE	FALSE
ENSDARG00000071007	FALSE	FALSE	FALSE	FALSE
ENSDARG00000091342	FALSE	FALSE	FALSE	FALSE
ENSDARG00000101540	FALSE	FALSE	FALSE	FALSE
ENSDARG00000091266	FALSE	FALSE	FALSE	FALSE
ENSDARG00000111157	FALSE	FALSE	FALSE	FALSE
ENSDARG00000074428	FALSE	FALSE	FALSE	FALSE
ENSDARG00000013794	FALSE	TRUE	FALSE	FALSE
ENSDARG00000104480	FALSE	FALSE	FALSE	FALSE
ENSDARG00000002403	FALSE	FALSE	FALSE	FALSE
ENSDARG00000060671	FALSE	FALSE	FALSE	FALSE
ENSDARG00000058953	FALSE	FALSE	FALSE	FALSE
ENSDARG00000105282	FALSE	FALSE	FALSE	FALSE
ENSDARG00000060150	FALSE	FALSE	FALSE	TRUE
ENSDARG00000095427	FALSE	FALSE	FALSE	TRUE
ENSDARG00000010981	FALSE	FALSE	FALSE	FALSE
ENSDARG00000002172	FALSE	FALSE	FALSE	FALSE
ENSDARG00000011418	FALSE	FALSE	FALSE	FALSE
ENSDARG00000091511	FALSE	FALSE	FALSE	FALSE
ENSDARG00000035735	FALSE	FALSE	FALSE	FALSE
ENSDARG00000075643	FALSE	FALSE	FALSE	FALSE
ENSDARG00000080775	FALSE	FALSE	FALSE	FALSE
ENSDARG00000036930	FALSE	FALSE	FALSE	FALSE
ENSDARG00000007398	FALSE	FALSE	FALSE	FALSE
ENSDARG00000079741	FALSE	FALSE	FALSE	FALSE
ENSDARG00000035563	FALSE	FALSE	FALSE	TRUE
ENSDARG00000113103	FALSE	FALSE	FALSE	FALSE
ENSDARG00000030949	FALSE	FALSE	FALSE	FALSE
ENSDARG00000101677	FALSE	FALSE	FALSE	FALSE
ENSDARG00000116838	FALSE	FALSE	FALSE	FALSE
ENSDARG00000041839	FALSE	FALSE	FALSE	FALSE
ENSDARG00000040698	FALSE	FALSE	FALSE	TRUE
ENSDARG00000112514	FALSE	FALSE	FALSE	FALSE
ENSDARG00000030116	FALSE	FALSE	FALSE	TRUE
ENSDARG00000005232	FALSE	FALSE	FALSE	TRUE
ENSDARG00000029402	FALSE	FALSE	FALSE	FALSE
ENSDARG00000098641	FALSE	FALSE	FALSE	FALSE
ENSDARG00000045402	FALSE	FALSE	FALSE	FALSE
ENSDARG00000008866	FALSE	FALSE	FALSE	FALSE
ENSDARG00000113682	FALSE	FALSE	FALSE	FALSE
ENSDARG00000100273	FALSE	FALSE	FALSE	FALSE
ENSDARG00000068104	FALSE	FALSE	FALSE	FALSE
ENSDARG00000110195	FALSE	FALSE	FALSE	FALSE
ENSDARG00000055889	FALSE	FALSE	FALSE	FALSE
ENSDARG00000062135	FALSE	FALSE	TRUE	FALSE
ENSDARG00000000563	FALSE	FALSE	FALSE	FALSE
ENSDARG00000042670	FALSE	FALSE	FALSE	TRUE
ENSDARG00000078249	FALSE	FALSE	FALSE	FALSE
ENSDARG00000074849	FALSE	FALSE	FALSE	FALSE
ENSDARG00000044751	FALSE	FALSE	FALSE	FALSE
ENSDARG00000104172	FALSE	FALSE	FALSE	FALSE
ENSDARG00000112759	FALSE	FALSE	FALSE	FALSE
ENSDARG00000098680	FALSE	FALSE	FALSE	FALSE
ENSDARG00000053124	FALSE	FALSE	FALSE	FALSE
ENSDARG00000030251	FALSE	FALSE	FALSE	FALSE
ENSDARG00000038242	FALSE	FALSE	FALSE	TRUE
ENSDARG00000020541	FALSE	FALSE	FALSE	TRUE
ENSDARG00000097663	FALSE	FALSE	FALSE	FALSE
ENSDARG00000038386	FALSE	TRUE	FALSE	FALSE
ENSDARG00000054224	FALSE	FALSE	FALSE	FALSE
ENSDARG00000041576	FALSE	FALSE	FALSE	FALSE
ENSDARG00000101750	FALSE	FALSE	FALSE	FALSE
ENSDARG00000074221	FALSE	FALSE	FALSE	FALSE
ENSDARG00000117389	FALSE	FALSE	FALSE	FALSE
ENSDARG00000057328	FALSE	FALSE	FALSE	FALSE
ENSDARG00000089976	FALSE	FALSE	FALSE	FALSE
ENSDARG00000020298	TRUE	FALSE	FALSE	FALSE
ENSDARG00000035120	FALSE	FALSE	TRUE	TRUE
ENSDARG00000077817	FALSE	FALSE	FALSE	FALSE
ENSDARG00000082495	FALSE	FALSE	FALSE	FALSE
ENSDARG00000010681	FALSE	FALSE	FALSE	FALSE
ENSDARG00000044769	FALSE	FALSE	FALSE	FALSE
ENSDARG00000070013	FALSE	FALSE	FALSE	FALSE
ENSDARG00000103871	FALSE	FALSE	FALSE	FALSE
ENSDARG00000013938	FALSE	FALSE	FALSE	TRUE
ENSDARG00000079930	FALSE	FALSE	FALSE	FALSE
ENSDARG00000112342	FALSE	FALSE	FALSE	FALSE
ENSDARG00000087413	FALSE	FALSE	FALSE	FALSE
ENSDARG00000053386	FALSE	FALSE	FALSE	FALSE
ENSDARG00000104155	FALSE	FALSE	FALSE	FALSE
ENSDARG00000115261	FALSE	FALSE	FALSE	FALSE
ENSDARG00000082177	FALSE	FALSE	FALSE	FALSE
ENSDARG00000052556	FALSE	FALSE	FALSE	FALSE
ENSDARG00000073858	FALSE	FALSE	FALSE	FALSE
ENSDARG00000059001	TRUE	TRUE	FALSE	FALSE
ENSDARG00000053449	FALSE	FALSE	FALSE	FALSE
ENSDARG00000006288	FALSE	FALSE	FALSE	FALSE
ENSDARG00000037760	FALSE	FALSE	FALSE	FALSE
ENSDARG00000068194	FALSE	FALSE	FALSE	FALSE
ENSDARG00000035018	FALSE	FALSE	FALSE	FALSE
ENSDARG00000082428	FALSE	FALSE	FALSE	FALSE
ENSDARG00000070433	FALSE	FALSE	FALSE	FALSE
ENSDARG00000053447	FALSE	FALSE	FALSE	FALSE
ENSDARG00000109557	FALSE	FALSE	FALSE	FALSE
ENSDARG00000028348	FALSE	FALSE	FALSE	FALSE
ENSDARG00000019501	FALSE	FALSE	FALSE	FALSE
ENSDARG00000069808	FALSE	FALSE	FALSE	FALSE
ENSDARG00000098546	FALSE	FALSE	FALSE	FALSE
ENSDARG00000058004	FALSE	FALSE	FALSE	FALSE
ENSDARG00000026762	FALSE	FALSE	FALSE	FALSE
ENSDARG00000092267	FALSE	FALSE	FALSE	FALSE
ENSDARG00000052721	FALSE	FALSE	FALSE	TRUE
ENSDARG00000002607	FALSE	FALSE	FALSE	FALSE
ENSDARG00000105807	FALSE	FALSE	FALSE	FALSE
ENSDARG00000079128	FALSE	FALSE	FALSE	FALSE
ENSDARG00000007065	FALSE	FALSE	FALSE	FALSE
ENSDARG00000061810	FALSE	FALSE	FALSE	FALSE
ENSDARG00000070512	FALSE	FALSE	FALSE	FALSE
ENSDARG00000095895	FALSE	FALSE	FALSE	FALSE
ENSDARG00000114290	FALSE	FALSE	FALSE	FALSE
ENSDARG00000060849	FALSE	FALSE	FALSE	FALSE
ENSDARG00000077709	FALSE	FALSE	FALSE	FALSE
ENSDARG00000098771	FALSE	FALSE	FALSE	FALSE
ENSDARG00000060551	FALSE	FALSE	FALSE	FALSE
ENSDARG00000005690	FALSE	FALSE	FALSE	FALSE
ENSDARG00000062430	FALSE	FALSE	FALSE	FALSE
ENSDARG00000097025	FALSE	FALSE	FALSE	FALSE
ENSDARG00000026081	FALSE	FALSE	FALSE	FALSE
ENSDARG00000094362	FALSE	FALSE	FALSE	FALSE
ENSDARG00000117637	FALSE	FALSE	FALSE	FALSE
ENSDARG00000096271	FALSE	FALSE	FALSE	FALSE
ENSDARG00000025404	FALSE	FALSE	FALSE	FALSE
ENSDARG00000043134	FALSE	FALSE	FALSE	FALSE
ENSDARG00000070494	FALSE	FALSE	FALSE	FALSE
ENSDARG00000117007	FALSE	FALSE	FALSE	FALSE
ENSDARG00000078435	FALSE	FALSE	FALSE	FALSE
ENSDARG00000003732	FALSE	FALSE	FALSE	FALSE
ENSDARG00000035678	FALSE	FALSE	FALSE	FALSE
ENSDARG00000055154	FALSE	FALSE	FALSE	FALSE
ENSDARG00000010823	FALSE	FALSE	FALSE	TRUE
ENSDARG00000060023	FALSE	FALSE	FALSE	FALSE
ENSDARG00000098803	FALSE	FALSE	FALSE	FALSE
ENSDARG00000044062	FALSE	FALSE	FALSE	FALSE
ENSDARG00000007477	FALSE	FALSE	FALSE	FALSE
ENSDARG00000071084	FALSE	FALSE	FALSE	FALSE
ENSDARG00000102418	FALSE	FALSE	FALSE	FALSE
ENSDARG00000096307	FALSE	FALSE	FALSE	FALSE
ENSDARG00000116840	FALSE	FALSE	FALSE	FALSE
ENSDARG00000059933	FALSE	FALSE	FALSE	FALSE
ENSDARG00000042329	FALSE	FALSE	FALSE	FALSE
ENSDARG00000057635	FALSE	FALSE	FALSE	FALSE
ENSDARG00000059965	FALSE	FALSE	FALSE	FALSE
ENSDARG00000100366	FALSE	FALSE	FALSE	FALSE
ENSDARG00000028213	FALSE	FALSE	FALSE	FALSE
ENSDARG00000089075	FALSE	FALSE	FALSE	FALSE
ENSDARG00000017781	FALSE	FALSE	FALSE	FALSE
ENSDARG00000078133	FALSE	FALSE	FALSE	FALSE
ENSDARG00000074565	FALSE	FALSE	FALSE	FALSE
ENSDARG00000092005	FALSE	FALSE	FALSE	FALSE
ENSDARG00000020417	FALSE	FALSE	FALSE	FALSE
ENSDARG00000011235	FALSE	FALSE	FALSE	FALSE
ENSDARG00000081937	FALSE	FALSE	FALSE	FALSE
ENSDARG00000116396	FALSE	FALSE	FALSE	FALSE
ENSDARG00000062427	FALSE	FALSE	FALSE	FALSE
ENSDARG00000109871	FALSE	FALSE	FALSE	FALSE
ENSDARG00000098720	FALSE	FALSE	FALSE	FALSE
ENSDARG00000070426	TRUE	FALSE	FALSE	FALSE
ENSDARG00000035468	FALSE	FALSE	FALSE	TRUE
ENSDARG00000038615	FALSE	FALSE	FALSE	FALSE
ENSDARG00000117516	FALSE	FALSE	FALSE	FALSE
ENSDARG00000070538	FALSE	FALSE	FALSE	FALSE
ENSDARG00000029415	FALSE	FALSE	FALSE	FALSE
ENSDARG00000096851	FALSE	FALSE	FALSE	FALSE
ENSDARG00000018303	FALSE	FALSE	FALSE	TRUE
ENSDARG00000092996	FALSE	FALSE	FALSE	FALSE
ENSDARG00000007786	FALSE	FALSE	FALSE	FALSE
ENSDARG00000054087	FALSE	FALSE	FALSE	FALSE
ENSDARG00000105738	FALSE	FALSE	FALSE	FALSE
ENSDARG00000020001	FALSE	FALSE	FALSE	FALSE
ENSDARG00000105502	FALSE	FALSE	FALSE	FALSE
ENSDARG00000083634	FALSE	FALSE	FALSE	FALSE
ENSDARG00000027491	FALSE	FALSE	FALSE	FALSE
ENSDARG00000111532	FALSE	FALSE	FALSE	FALSE
ENSDARG00000099312	FALSE	FALSE	FALSE	FALSE
ENSDARG00000106545	FALSE	FALSE	FALSE	FALSE
ENSDARG00000105209	FALSE	FALSE	FALSE	FALSE
ENSDARG00000104903	FALSE	FALSE	FALSE	FALSE
ENSDARG00000056618	FALSE	FALSE	FALSE	TRUE
ENSDARG00000007405	FALSE	FALSE	FALSE	FALSE
ENSDARG00000117442	FALSE	FALSE	FALSE	FALSE
ENSDARG00000053138	FALSE	FALSE	FALSE	FALSE
ENSDARG00000090292	FALSE	FALSE	FALSE	FALSE
ENSDARG00000078755	FALSE	FALSE	FALSE	FALSE
ENSDARG00000038789	FALSE	FALSE	FALSE	FALSE
ENSDARG00000051926	FALSE	FALSE	FALSE	FALSE
ENSDARG00000099527	FALSE	FALSE	FALSE	FALSE
ENSDARG00000086631	FALSE	FALSE	FALSE	FALSE
ENSDARG00000017400	FALSE	FALSE	FALSE	FALSE
ENSDARG00000032013	FALSE	FALSE	FALSE	TRUE
ENSDARG00000095365	FALSE	FALSE	FALSE	FALSE
ENSDARG00000116360	FALSE	FALSE	FALSE	FALSE
ENSDARG00000057099	FALSE	FALSE	FALSE	FALSE
ENSDARG00000045091	FALSE	FALSE	FALSE	FALSE
ENSDARG00000038306	FALSE	FALSE	FALSE	TRUE
ENSDARG00000079751	FALSE	FALSE	FALSE	TRUE
ENSDARG00000056102	FALSE	FALSE	FALSE	FALSE
ENSDARG00000056651	FALSE	FALSE	FALSE	FALSE
ENSDARG00000095260	FALSE	FALSE	FALSE	FALSE
ENSDARG00000103959	FALSE	FALSE	FALSE	FALSE
ENSDARG00000075098	FALSE	FALSE	FALSE	FALSE
ENSDARG00000059276	FALSE	FALSE	FALSE	FALSE
ENSDARG00000076351	FALSE	FALSE	FALSE	FALSE
ENSDARG00000110538	FALSE	FALSE	FALSE	FALSE
ENSDARG00000113830	FALSE	FALSE	FALSE	FALSE
ENSDARG00000037587	FALSE	FALSE	FALSE	FALSE
ENSDARG00000090946	FALSE	FALSE	FALSE	FALSE
ENSDARG00000114693	FALSE	FALSE	FALSE	FALSE
ENSDARG00000005915	FALSE	FALSE	FALSE	FALSE
ENSDARG00000061311	FALSE	FALSE	FALSE	FALSE
ENSDARG00000008235	FALSE	FALSE	FALSE	FALSE
ENSDARG00000037199	FALSE	FALSE	FALSE	FALSE
ENSDARG00000011245	FALSE	FALSE	FALSE	TRUE
ENSDARG00000114778	FALSE	FALSE	FALSE	FALSE
ENSDARG00000075116	FALSE	FALSE	FALSE	FALSE
ENSDARG00000054302	FALSE	FALSE	FALSE	FALSE
ENSDARG00000103862	FALSE	FALSE	FALSE	FALSE
ENSDARG00000098903	FALSE	FALSE	FALSE	FALSE
ENSDARG00000028067	FALSE	FALSE	FALSE	FALSE
ENSDARG00000094097	FALSE	FALSE	FALSE	FALSE
ENSDARG00000040633	FALSE	FALSE	FALSE	FALSE
ENSDARG00000056594	FALSE	FALSE	FALSE	TRUE
ENSDARG00000079881	FALSE	FALSE	FALSE	FALSE
ENSDARG00000010052	FALSE	FALSE	FALSE	FALSE
ENSDARG00000102889	FALSE	FALSE	FALSE	FALSE
ENSDARG00000038737	FALSE	FALSE	FALSE	FALSE
ENSDARG00000116355	FALSE	FALSE	FALSE	FALSE
ENSDARG00000063229	FALSE	FALSE	FALSE	FALSE
ENSDARG00000087443	FALSE	FALSE	FALSE	TRUE
ENSDARG00000058108	FALSE	FALSE	FALSE	FALSE
ENSDARG00000010844	FALSE	FALSE	FALSE	FALSE
ENSDARG00000026369	FALSE	FALSE	FALSE	FALSE
ENSDARG00000116816	FALSE	FALSE	FALSE	FALSE
ENSDARG00000102824	FALSE	FALSE	FALSE	FALSE
ENSDARG00000094064	FALSE	FALSE	FALSE	FALSE
ENSDARG00000026473	FALSE	FALSE	FALSE	FALSE
ENSDARG00000036990	FALSE	FALSE	FALSE	FALSE
ENSDARG00000021140	FALSE	FALSE	FALSE	FALSE
ENSDARG00000043241	FALSE	FALSE	FALSE	FALSE
ENSDARG00000091870	FALSE	FALSE	FALSE	FALSE
ENSDARG00000081082	FALSE	FALSE	FALSE	FALSE
ENSDARG00000056141	FALSE	FALSE	FALSE	FALSE
ENSDARG00000044298	FALSE	FALSE	FALSE	FALSE
ENSDARG00000025233	FALSE	FALSE	FALSE	FALSE
ENSDARG00000102898	FALSE	FALSE	FALSE	FALSE
ENSDARG00000022904	FALSE	FALSE	FALSE	FALSE
ENSDARG00000079241	FALSE	FALSE	FALSE	FALSE
ENSDARG00000073721	FALSE	FALSE	FALSE	FALSE
ENSDARG00000060394	FALSE	FALSE	FALSE	FALSE
ENSDARG00000030938	FALSE	FALSE	FALSE	FALSE
ENSDARG00000077487	FALSE	FALSE	FALSE	FALSE
ENSDARG00000106101	FALSE	FALSE	FALSE	FALSE
ENSDARG00000058226	FALSE	FALSE	FALSE	TRUE
ENSDARG00000106182	FALSE	FALSE	FALSE	FALSE
ENSDARG00000087181	FALSE	FALSE	FALSE	FALSE
ENSDARG00000042732	FALSE	FALSE	FALSE	FALSE
ENSDARG00000101279	FALSE	FALSE	FALSE	FALSE
ENSDARG00000088805	FALSE	FALSE	FALSE	FALSE
ENSDARG00000076074	FALSE	FALSE	FALSE	FALSE
ENSDARG00000102917	FALSE	FALSE	FALSE	FALSE
ENSDARG00000015399	FALSE	FALSE	FALSE	FALSE
ENSDARG00000093266	FALSE	FALSE	FALSE	FALSE
ENSDARG00000024619	FALSE	FALSE	FALSE	FALSE
ENSDARG00000042091	FALSE	FALSE	FALSE	FALSE
ENSDARG00000086815	FALSE	FALSE	FALSE	FALSE
ENSDARG00000031907	FALSE	TRUE	FALSE	TRUE
ENSDARG00000053027	FALSE	FALSE	FALSE	FALSE
ENSDARG00000093773	FALSE	FALSE	FALSE	FALSE
ENSDARG00000069382	FALSE	FALSE	TRUE	TRUE
ENSDARG00000005327	FALSE	FALSE	FALSE	FALSE
ENSDARG00000075369	FALSE	FALSE	FALSE	FALSE
ENSDARG00000076752	FALSE	FALSE	FALSE	TRUE
ENSDARG00000113824	FALSE	FALSE	FALSE	FALSE
ENSDARG00000061490	FALSE	FALSE	FALSE	FALSE
ENSDARG00000095600	FALSE	FALSE	FALSE	FALSE
ENSDARG00000009142	FALSE	FALSE	FALSE	FALSE
ENSDARG00000100646	FALSE	FALSE	FALSE	FALSE
ENSDARG00000099009	FALSE	FALSE	FALSE	FALSE
ENSDARG00000069305	FALSE	FALSE	FALSE	FALSE
ENSDARG00000113887	FALSE	FALSE	FALSE	FALSE
ENSDARG00000100940	FALSE	FALSE	FALSE	FALSE
ENSDARG00000032318	FALSE	FALSE	FALSE	FALSE
ENSDARG00000058008	FALSE	FALSE	FALSE	FALSE
ENSDARG00000090369	FALSE	FALSE	FALSE	FALSE
ENSDARG00000076269	FALSE	FALSE	FALSE	FALSE
ENSDARG00000057452	FALSE	FALSE	FALSE	FALSE
ENSDARG00000100358	FALSE	FALSE	FALSE	FALSE
ENSDARG00000062216	FALSE	FALSE	FALSE	FALSE
ENSDARG00000014939	FALSE	FALSE	FALSE	FALSE
ENSDARG00000063626	FALSE	FALSE	FALSE	TRUE
ENSDARG00000005544	FALSE	FALSE	FALSE	FALSE
ENSDARG00000044642	FALSE	FALSE	FALSE	FALSE
ENSDARG00000069469	FALSE	FALSE	FALSE	FALSE
ENSDARG00000070843	FALSE	FALSE	FALSE	FALSE
ENSDARG00000100462	FALSE	FALSE	FALSE	FALSE
ENSDARG00000056855	FALSE	FALSE	FALSE	TRUE
ENSDARG00000078004	FALSE	TRUE	TRUE	TRUE
ENSDARG00000024575	FALSE	FALSE	FALSE	FALSE
ENSDARG00000028845	FALSE	FALSE	FALSE	FALSE
ENSDARG00000019636	FALSE	FALSE	FALSE	FALSE
ENSDARG00000069254	FALSE	FALSE	FALSE	FALSE
ENSDARG00000042000	FALSE	FALSE	FALSE	FALSE
ENSDARG00000075021	FALSE	FALSE	FALSE	FALSE
ENSDARG00000073957	FALSE	FALSE	FALSE	FALSE
ENSDARG00000091203	FALSE	FALSE	FALSE	FALSE
ENSDARG00000077349	FALSE	FALSE	FALSE	FALSE
ENSDARG00000097219	FALSE	FALSE	FALSE	FALSE
ENSDARG00000100731	FALSE	FALSE	FALSE	FALSE
ENSDARG00000091481	FALSE	FALSE	FALSE	FALSE
ENSDARG00000019135	FALSE	FALSE	FALSE	FALSE
ENSDARG00000045490	FALSE	FALSE	FALSE	TRUE
ENSDARG00000073824	FALSE	FALSE	FALSE	FALSE
ENSDARG00000091640	FALSE	FALSE	FALSE	FALSE
ENSDARG00000092181	FALSE	FALSE	FALSE	FALSE
ENSDARG00000028900	FALSE	FALSE	FALSE	FALSE
ENSDARG00000018190	FALSE	FALSE	FALSE	FALSE
ENSDARG00000074310	FALSE	FALSE	FALSE	FALSE
ENSDARG00000063310	FALSE	FALSE	FALSE	FALSE
ENSDARG00000067805	FALSE	FALSE	FALSE	FALSE
ENSDARG00000038785	TRUE	TRUE	TRUE	TRUE
ENSDARG00000026178	FALSE	FALSE	FALSE	FALSE
ENSDARG00000076776	FALSE	FALSE	FALSE	FALSE
ENSDARG00000101637	FALSE	FALSE	FALSE	FALSE
ENSDARG00000070447	FALSE	FALSE	FALSE	FALSE
ENSDARG00000036915	FALSE	FALSE	FALSE	FALSE
ENSDARG00000062590	FALSE	FALSE	FALSE	TRUE
ENSDARG00000036424	FALSE	FALSE	FALSE	FALSE
ENSDARG00000009217	FALSE	FALSE	FALSE	FALSE
ENSDARG00000035325	FALSE	FALSE	FALSE	FALSE
ENSDARG00000097853	FALSE	FALSE	FALSE	FALSE
ENSDARG00000006602	FALSE	FALSE	FALSE	FALSE
ENSDARG00000101145	FALSE	FALSE	FALSE	FALSE
ENSDARG00000001776	FALSE	FALSE	FALSE	FALSE
ENSDARG00000102967	FALSE	FALSE	FALSE	FALSE
ENSDARG00000073920	FALSE	FALSE	FALSE	FALSE
ENSDARG00000114028	FALSE	FALSE	FALSE	FALSE
ENSDARG00000093630	FALSE	FALSE	FALSE	FALSE
ENSDARG00000061478	FALSE	FALSE	FALSE	TRUE
ENSDARG00000094685	FALSE	FALSE	FALSE	FALSE
ENSDARG00000087554	FALSE	FALSE	FALSE	FALSE
ENSDARG00000008540	FALSE	FALSE	FALSE	FALSE
ENSDARG00000014137	FALSE	FALSE	FALSE	TRUE
ENSDARG00000020876	FALSE	FALSE	FALSE	FALSE
ENSDARG00000096740	FALSE	FALSE	FALSE	FALSE
ENSDARG00000043322	FALSE	FALSE	FALSE	FALSE
ENSDARG00000009472	FALSE	FALSE	FALSE	FALSE
ENSDARG00000013705	FALSE	FALSE	FALSE	TRUE
ENSDARG00000093547	FALSE	FALSE	FALSE	FALSE
ENSDARG00000083280	FALSE	FALSE	FALSE	FALSE
ENSDARG00000058736	FALSE	FALSE	FALSE	FALSE
ENSDARG00000101825	FALSE	FALSE	FALSE	FALSE
ENSDARG00000104413	FALSE	FALSE	FALSE	FALSE
ENSDARG00000013274	FALSE	FALSE	FALSE	FALSE
ENSDARG00000052045	FALSE	FALSE	FALSE	FALSE
ENSDARG00000104329	FALSE	FALSE	FALSE	FALSE
ENSDARG00000078310	FALSE	FALSE	FALSE	FALSE
ENSDARG00000101798	FALSE	FALSE	FALSE	FALSE
ENSDARG00000097206	FALSE	FALSE	FALSE	FALSE
ENSDARG00000053804	FALSE	FALSE	FALSE	FALSE
ENSDARG00000105136	FALSE	FALSE	FALSE	FALSE
ENSDARG00000079656	FALSE	FALSE	FALSE	FALSE
ENSDARG00000110684	FALSE	FALSE	FALSE	FALSE
ENSDARG00000104324	FALSE	FALSE	FALSE	FALSE
ENSDARG00000078026	FALSE	FALSE	FALSE	FALSE
ENSDARG00000061437	FALSE	FALSE	FALSE	FALSE
ENSDARG00000073802	FALSE	FALSE	FALSE	FALSE
ENSDARG00000034189	FALSE	FALSE	FALSE	TRUE
ENSDARG00000104782	FALSE	FALSE	FALSE	FALSE
ENSDARG00000019532	FALSE	FALSE	FALSE	FALSE
ENSDARG00000011876	FALSE	FALSE	FALSE	TRUE
ENSDARG00000092856	FALSE	FALSE	FALSE	FALSE
ENSDARG00000043077	FALSE	FALSE	FALSE	FALSE
ENSDARG00000041232	FALSE	TRUE	FALSE	TRUE
ENSDARG00000015374	FALSE	FALSE	FALSE	FALSE
ENSDARG00000060249	FALSE	FALSE	FALSE	TRUE
ENSDARG00000036080	FALSE	FALSE	FALSE	FALSE
ENSDARG00000113632	FALSE	FALSE	FALSE	FALSE
ENSDARG00000101622	FALSE	FALSE	FALSE	FALSE
ENSDARG00000042723	FALSE	FALSE	FALSE	FALSE
ENSDARG00000110271	FALSE	FALSE	FALSE	FALSE
ENSDARG00000112426	FALSE	FALSE	FALSE	FALSE
ENSDARG00000041853	FALSE	FALSE	FALSE	FALSE
ENSDARG00000019566	FALSE	FALSE	FALSE	FALSE
ENSDARG00000116362	FALSE	FALSE	FALSE	FALSE
ENSDARG00000105123	FALSE	FALSE	FALSE	FALSE
ENSDARG00000002538	FALSE	FALSE	FALSE	TRUE
ENSDARG00000045801	FALSE	FALSE	FALSE	FALSE
ENSDARG00000103676	FALSE	FALSE	FALSE	FALSE
ENSDARG00000101834	FALSE	FALSE	FALSE	FALSE
ENSDARG00000099365	FALSE	FALSE	FALSE	FALSE
ENSDARG00000052535	FALSE	FALSE	FALSE	FALSE
ENSDARG00000004757	TRUE	TRUE	FALSE	TRUE
ENSDARG00000111592	FALSE	FALSE	FALSE	FALSE
ENSDARG00000011545	FALSE	FALSE	FALSE	FALSE
ENSDARG00000092321	FALSE	FALSE	FALSE	FALSE
ENSDARG00000078118	FALSE	FALSE	FALSE	FALSE
ENSDARG00000004735	TRUE	TRUE	FALSE	TRUE
ENSDARG00000115011	FALSE	FALSE	FALSE	FALSE
ENSDARG00000002077	FALSE	FALSE	FALSE	FALSE
ENSDARG00000007387	FALSE	FALSE	FALSE	FALSE
ENSDARG00000105580	FALSE	FALSE	FALSE	FALSE
ENSDARG00000077791	FALSE	FALSE	FALSE	FALSE
ENSDARG00000056270	FALSE	FALSE	FALSE	FALSE
ENSDARG00000035290	FALSE	FALSE	FALSE	FALSE
ENSDARG00000030349	FALSE	FALSE	FALSE	FALSE
ENSDARG00000041376	FALSE	FALSE	FALSE	FALSE
ENSDARG00000074979	FALSE	TRUE	FALSE	TRUE
ENSDARG00000075824	FALSE	FALSE	FALSE	FALSE
ENSDARG00000022424	FALSE	FALSE	FALSE	FALSE
ENSDARG00000110566	FALSE	FALSE	FALSE	FALSE
ENSDARG00000074548	FALSE	FALSE	FALSE	FALSE
ENSDARG00000010591	FALSE	FALSE	FALSE	FALSE
ENSDARG00000036966	FALSE	FALSE	FALSE	FALSE
ENSDARG00000102254	FALSE	FALSE	FALSE	FALSE
ENSDARG00000040712	FALSE	FALSE	FALSE	FALSE
ENSDARG00000089207	FALSE	FALSE	FALSE	FALSE
ENSDARG00000006467	FALSE	FALSE	FALSE	TRUE
ENSDARG00000097420	FALSE	FALSE	FALSE	FALSE
ENSDARG00000110215	FALSE	FALSE	FALSE	FALSE
ENSDARG00000115329	FALSE	FALSE	FALSE	FALSE
ENSDARG00000040085	FALSE	FALSE	FALSE	FALSE
ENSDARG00000088315	FALSE	FALSE	FALSE	FALSE
ENSDARG00000093785	FALSE	FALSE	FALSE	FALSE
ENSDARG00000074955	FALSE	FALSE	FALSE	FALSE
ENSDARG00000060348	FALSE	FALSE	FALSE	FALSE
ENSDARG00000067613	FALSE	FALSE	FALSE	FALSE
ENSDARG00000070917	FALSE	FALSE	FALSE	FALSE
ENSDARG00000104837	FALSE	FALSE	FALSE	FALSE
ENSDARG00000103743	FALSE	FALSE	FALSE	FALSE
ENSDARG00000083457	FALSE	FALSE	FALSE	FALSE
ENSDARG00000051940	FALSE	FALSE	FALSE	FALSE
ENSDARG00000099920	FALSE	FALSE	FALSE	FALSE
ENSDARG00000060361	FALSE	FALSE	FALSE	FALSE
ENSDARG00000097195	FALSE	FALSE	FALSE	FALSE
ENSDARG00000059689	FALSE	FALSE	FALSE	FALSE
ENSDARG00000040257	FALSE	FALSE	FALSE	FALSE
ENSDARG00000022832	FALSE	FALSE	FALSE	FALSE
ENSDARG00000076213	FALSE	FALSE	FALSE	FALSE
ENSDARG00000077295	FALSE	FALSE	FALSE	FALSE
ENSDARG00000062178	FALSE	FALSE	FALSE	FALSE
ENSDARG00000040966	FALSE	FALSE	FALSE	FALSE
ENSDARG00000026548	FALSE	FALSE	FALSE	FALSE
ENSDARG00000037916	FALSE	FALSE	FALSE	FALSE
ENSDARG00000016858	FALSE	FALSE	FALSE	TRUE
ENSDARG00000103196	FALSE	FALSE	FALSE	FALSE
ENSDARG00000039064	FALSE	FALSE	FALSE	FALSE
ENSDARG00000043126	TRUE	TRUE	TRUE	TRUE
ENSDARG00000045618	FALSE	FALSE	FALSE	FALSE
ENSDARG00000076627	FALSE	FALSE	FALSE	TRUE
ENSDARG00000040255	FALSE	FALSE	FALSE	FALSE
ENSDARG00000043332	FALSE	FALSE	FALSE	FALSE
ENSDARG00000014340	FALSE	FALSE	FALSE	FALSE
ENSDARG00000039843	FALSE	FALSE	FALSE	FALSE
ENSDARG00000032430	FALSE	FALSE	FALSE	TRUE
ENSDARG00000076171	FALSE	FALSE	FALSE	FALSE
ENSDARG00000038898	FALSE	FALSE	FALSE	FALSE
ENSDARG00000110122	FALSE	FALSE	FALSE	FALSE
ENSDARG00000063144	FALSE	FALSE	FALSE	FALSE
ENSDARG00000044601	FALSE	FALSE	FALSE	FALSE
ENSDARG00000024602	FALSE	FALSE	TRUE	FALSE
ENSDARG00000005092	FALSE	FALSE	FALSE	FALSE
ENSDARG00000036446	FALSE	FALSE	FALSE	FALSE
ENSDARG00000019293	FALSE	FALSE	FALSE	TRUE
ENSDARG00000073709	FALSE	FALSE	FALSE	FALSE
ENSDARG00000083129	FALSE	FALSE	FALSE	FALSE
ENSDARG00000088699	FALSE	FALSE	FALSE	FALSE
ENSDARG00000068428	FALSE	FALSE	FALSE	FALSE
ENSDARG00000062824	FALSE	FALSE	FALSE	FALSE
ENSDARG00000094055	FALSE	FALSE	FALSE	FALSE
ENSDARG00000056892	FALSE	FALSE	FALSE	TRUE
ENSDARG00000074599	FALSE	FALSE	FALSE	FALSE
ENSDARG00000040547	FALSE	FALSE	FALSE	FALSE
ENSDARG00000114506	FALSE	FALSE	FALSE	FALSE
ENSDARG00000113709	FALSE	FALSE	FALSE	FALSE
ENSDARG00000004586	FALSE	FALSE	FALSE	FALSE
ENSDARG00000035521	FALSE	FALSE	FALSE	FALSE
ENSDARG00000045145	FALSE	FALSE	FALSE	FALSE
ENSDARG00000094392	FALSE	FALSE	FALSE	FALSE
ENSDARG00000007247	FALSE	FALSE	FALSE	FALSE
ENSDARG00000078599	FALSE	FALSE	FALSE	FALSE
ENSDARG00000114067	FALSE	FALSE	FALSE	FALSE
ENSDARG00000077298	FALSE	FALSE	FALSE	TRUE
ENSDARG00000052113	FALSE	FALSE	FALSE	FALSE
ENSDARG00000068233	FALSE	FALSE	FALSE	FALSE
ENSDARG00000109130	FALSE	FALSE	FALSE	FALSE
ENSDARG00000011488	FALSE	FALSE	FALSE	FALSE
ENSDARG00000060679	FALSE	FALSE	FALSE	TRUE
ENSDARG00000096630	FALSE	FALSE	FALSE	FALSE
ENSDARG00000076928	FALSE	FALSE	FALSE	FALSE
ENSDARG00000103815	FALSE	FALSE	FALSE	FALSE
ENSDARG00000107376	FALSE	FALSE	FALSE	FALSE
ENSDARG00000061963	FALSE	FALSE	FALSE	TRUE
ENSDARG00000019995	FALSE	FALSE	FALSE	TRUE
ENSDARG00000094992	FALSE	FALSE	FALSE	FALSE
ENSDARG00000096003	FALSE	FALSE	FALSE	TRUE
ENSDARG00000044142	FALSE	FALSE	FALSE	TRUE
ENSDARG00000061974	FALSE	FALSE	FALSE	FALSE
ENSDARG00000100942	FALSE	FALSE	FALSE	FALSE
ENSDARG00000020482	FALSE	FALSE	FALSE	TRUE
ENSDARG00000054723	FALSE	FALSE	FALSE	TRUE
ENSDARG00000099767	FALSE	FALSE	FALSE	FALSE
ENSDARG00000054879	FALSE	FALSE	FALSE	FALSE
ENSDARG00000020594	FALSE	FALSE	FALSE	FALSE
ENSDARG00000056627	FALSE	FALSE	FALSE	FALSE
ENSDARG00000062806	FALSE	FALSE	FALSE	FALSE
ENSDARG00000016483	FALSE	FALSE	FALSE	FALSE
ENSDARG00000009771	FALSE	FALSE	FALSE	FALSE
ENSDARG00000117096	FALSE	FALSE	FALSE	FALSE
ENSDARG00000055479	FALSE	FALSE	FALSE	TRUE
ENSDARG00000082257	FALSE	FALSE	FALSE	FALSE
ENSDARG00000006385	FALSE	FALSE	FALSE	FALSE
ENSDARG00000035905	FALSE	FALSE	FALSE	FALSE
ENSDARG00000060018	FALSE	FALSE	FALSE	FALSE
ENSDARG00000002937	FALSE	FALSE	FALSE	FALSE
ENSDARG00000057053	FALSE	FALSE	FALSE	FALSE
ENSDARG00000068716	FALSE	FALSE	FALSE	FALSE
ENSDARG00000018022	FALSE	FALSE	FALSE	FALSE
ENSDARG00000014722	FALSE	FALSE	FALSE	TRUE
ENSDARG00000110433	FALSE	FALSE	FALSE	FALSE
ENSDARG00000113958	FALSE	FALSE	FALSE	FALSE
ENSDARG00000060116	FALSE	FALSE	FALSE	FALSE
ENSDARG00000053106	FALSE	FALSE	FALSE	FALSE
ENSDARG00000004189	FALSE	FALSE	FALSE	TRUE
ENSDARG00000031702	FALSE	FALSE	FALSE	FALSE
ENSDARG00000079438	FALSE	FALSE	FALSE	FALSE
ENSDARG00000092404	TRUE	FALSE	FALSE	FALSE
ENSDARG00000068156	FALSE	FALSE	FALSE	FALSE
ENSDARG00000109322	FALSE	FALSE	FALSE	FALSE
ENSDARG00000069767	FALSE	FALSE	FALSE	FALSE
ENSDARG00000039020	TRUE	TRUE	FALSE	TRUE
ENSDARG00000069356	FALSE	FALSE	FALSE	FALSE
ENSDARG00000113385	FALSE	FALSE	FALSE	FALSE
ENSDARG00000076532	FALSE	FALSE	FALSE	TRUE
ENSDARG00000015224	FALSE	FALSE	FALSE	FALSE
ENSDARG00000111177	FALSE	FALSE	FALSE	FALSE
ENSDARG00000027078	FALSE	FALSE	FALSE	TRUE
ENSDARG00000070028	FALSE	FALSE	FALSE	FALSE
ENSDARG00000055192	FALSE	FALSE	FALSE	FALSE
ENSDARG00000111695	FALSE	FALSE	FALSE	FALSE
ENSDARG00000027957	FALSE	FALSE	FALSE	FALSE
ENSDARG00000017388	FALSE	FALSE	FALSE	TRUE
ENSDARG00000100149	FALSE	FALSE	FALSE	FALSE
ENSDARG00000016263	FALSE	FALSE	FALSE	FALSE
ENSDARG00000004130	FALSE	FALSE	FALSE	FALSE
ENSDARG00000117366	FALSE	FALSE	FALSE	FALSE
ENSDARG00000042526	FALSE	FALSE	FALSE	TRUE
ENSDARG00000097375	FALSE	FALSE	FALSE	FALSE
ENSDARG00000069058	FALSE	FALSE	FALSE	FALSE
ENSDARG00000105232	FALSE	FALSE	FALSE	FALSE
ENSDARG00000096752	FALSE	FALSE	FALSE	FALSE
ENSDARG00000094475	FALSE	FALSE	FALSE	FALSE
ENSDARG00000104295	FALSE	FALSE	FALSE	FALSE
ENSDARG00000044356	FALSE	FALSE	FALSE	FALSE
ENSDARG00000013763	FALSE	FALSE	FALSE	FALSE
ENSDARG00000081303	FALSE	FALSE	FALSE	FALSE
ENSDARG00000116247	FALSE	FALSE	FALSE	FALSE
ENSDARG00000055653	FALSE	FALSE	FALSE	FALSE
ENSDARG00000013076	FALSE	FALSE	FALSE	FALSE
ENSDARG00000014321	FALSE	FALSE	FALSE	FALSE
ENSDARG00000054749	FALSE	FALSE	FALSE	TRUE
ENSDARG00000100973	FALSE	FALSE	FALSE	FALSE
ENSDARG00000055792	FALSE	FALSE	FALSE	FALSE
ENSDARG00000101178	FALSE	FALSE	FALSE	FALSE
ENSDARG00000101135	FALSE	FALSE	FALSE	FALSE
ENSDARG00000112468	FALSE	FALSE	FALSE	FALSE
ENSDARG00000086324	FALSE	FALSE	FALSE	FALSE
ENSDARG00000037020	FALSE	FALSE	FALSE	FALSE
ENSDARG00000070717	FALSE	FALSE	FALSE	FALSE
ENSDARG00000017748	FALSE	FALSE	FALSE	FALSE
ENSDARG00000102450	FALSE	FALSE	FALSE	FALSE
ENSDARG00000097072	FALSE	FALSE	FALSE	FALSE
ENSDARG00000112939	FALSE	FALSE	FALSE	FALSE
ENSDARG00000041723	FALSE	FALSE	FALSE	FALSE
ENSDARG00000013726	FALSE	FALSE	FALSE	FALSE
ENSDARG00000077622	FALSE	FALSE	FALSE	FALSE
ENSDARG00000016584	FALSE	FALSE	FALSE	FALSE
ENSDARG00000023933	FALSE	FALSE	FALSE	FALSE
ENSDARG00000018399	FALSE	FALSE	FALSE	FALSE
ENSDARG00000002912	FALSE	FALSE	FALSE	TRUE
ENSDARG00000093752	FALSE	FALSE	FALSE	FALSE
ENSDARG00000029482	FALSE	FALSE	FALSE	FALSE
ENSDARG00000062017	FALSE	FALSE	FALSE	FALSE
ENSDARG00000076564	FALSE	FALSE	FALSE	TRUE
ENSDARG00000042936	FALSE	FALSE	FALSE	FALSE
ENSDARG00000036695	FALSE	FALSE	FALSE	FALSE
ENSDARG00000027469	FALSE	FALSE	FALSE	FALSE
ENSDARG00000059601	FALSE	FALSE	FALSE	FALSE
ENSDARG00000032199	FALSE	FALSE	FALSE	FALSE
ENSDARG00000069951	FALSE	FALSE	FALSE	FALSE
ENSDARG00000100079	FALSE	FALSE	FALSE	FALSE
ENSDARG00000071697	FALSE	FALSE	FALSE	FALSE
ENSDARG00000097691	FALSE	FALSE	FALSE	FALSE
ENSDARG00000013950	FALSE	FALSE	FALSE	FALSE
ENSDARG00000056725	TRUE	FALSE	FALSE	TRUE
ENSDARG00000097538	FALSE	FALSE	FALSE	FALSE
ENSDARG00000060601	FALSE	FALSE	FALSE	FALSE
ENSDARG00000036593	FALSE	FALSE	FALSE	FALSE
ENSDARG00000036073	FALSE	FALSE	FALSE	FALSE
ENSDARG00000110404	FALSE	FALSE	FALSE	FALSE
ENSDARG00000114078	FALSE	FALSE	FALSE	FALSE
ENSDARG00000097088	FALSE	FALSE	FALSE	FALSE
ENSDARG00000068729	FALSE	FALSE	FALSE	FALSE
ENSDARG00000104107	FALSE	FALSE	FALSE	FALSE
ENSDARG00000090708	FALSE	FALSE	FALSE	FALSE
ENSDARG00000116282	FALSE	FALSE	FALSE	FALSE
ENSDARG00000004587	FALSE	FALSE	FALSE	FALSE
ENSDARG00000086463	FALSE	FALSE	FALSE	FALSE
ENSDARG00000110745	FALSE	FALSE	FALSE	FALSE
ENSDARG00000054237	FALSE	FALSE	FALSE	FALSE
ENSDARG00000056695	FALSE	FALSE	FALSE	TRUE
ENSDARG00000069168	FALSE	FALSE	FALSE	FALSE
ENSDARG00000104910	FALSE	FALSE	FALSE	FALSE
ENSDARG00000029051	FALSE	FALSE	FALSE	FALSE
ENSDARG00000088711	FALSE	FALSE	FALSE	FALSE
ENSDARG00000097795	FALSE	FALSE	FALSE	FALSE
ENSDARG00000110472	FALSE	FALSE	FALSE	FALSE
ENSDARG00000113051	FALSE	FALSE	FALSE	FALSE
ENSDARG00000005883	FALSE	FALSE	FALSE	FALSE
ENSDARG00000003789	FALSE	FALSE	FALSE	TRUE
ENSDARG00000055162	FALSE	FALSE	FALSE	FALSE
ENSDARG00000012699	FALSE	FALSE	FALSE	TRUE
ENSDARG00000040237	FALSE	FALSE	FALSE	FALSE
ENSDARG00000008986	FALSE	FALSE	FALSE	FALSE
ENSDARG00000076111	FALSE	TRUE	FALSE	FALSE
ENSDARG00000021979	FALSE	FALSE	FALSE	FALSE
ENSDARG00000094197	FALSE	FALSE	FALSE	FALSE
ENSDARG00000030449	FALSE	FALSE	FALSE	TRUE
ENSDARG00000093708	FALSE	FALSE	FALSE	FALSE
ENSDARG00000021046	FALSE	FALSE	FALSE	FALSE
ENSDARG00000098390	FALSE	FALSE	FALSE	FALSE
ENSDARG00000017917	FALSE	TRUE	FALSE	TRUE
ENSDARG00000052157	FALSE	FALSE	FALSE	FALSE
ENSDARG00000077769	FALSE	TRUE	FALSE	FALSE
ENSDARG00000029524	FALSE	FALSE	FALSE	TRUE
ENSDARG00000061631	FALSE	FALSE	FALSE	TRUE
ENSDARG00000101925	FALSE	FALSE	FALSE	FALSE
ENSDARG00000014348	FALSE	FALSE	FALSE	FALSE
ENSDARG00000103412	FALSE	FALSE	FALSE	FALSE
ENSDARG00000079036	TRUE	FALSE	FALSE	FALSE
ENSDARG00000055138	FALSE	FALSE	FALSE	FALSE
ENSDARG00000035990	FALSE	FALSE	FALSE	FALSE
ENSDARG00000037383	FALSE	FALSE	FALSE	FALSE
ENSDARG00000060397	FALSE	FALSE	FALSE	FALSE
ENSDARG00000054181	FALSE	FALSE	FALSE	FALSE
ENSDARG00000021343	FALSE	FALSE	FALSE	FALSE
ENSDARG00000045605	FALSE	FALSE	FALSE	FALSE
ENSDARG00000116271	FALSE	FALSE	FALSE	FALSE
ENSDARG00000056235	FALSE	FALSE	FALSE	FALSE
ENSDARG00000000370	FALSE	FALSE	FALSE	FALSE
ENSDARG00000092535	FALSE	FALSE	FALSE	FALSE
ENSDARG00000060312	FALSE	FALSE	FALSE	FALSE
ENSDARG00000091366	FALSE	FALSE	FALSE	FALSE
ENSDARG00000060723	FALSE	FALSE	FALSE	FALSE
ENSDARG00000070386	FALSE	FALSE	FALSE	FALSE
ENSDARG00000012553	FALSE	FALSE	FALSE	TRUE
ENSDARG00000102300	FALSE	FALSE	FALSE	FALSE
ENSDARG00000063018	FALSE	FALSE	FALSE	FALSE
ENSDARG00000074245	FALSE	FALSE	FALSE	FALSE
ENSDARG00000101823	FALSE	FALSE	FALSE	FALSE
ENSDARG00000090064	FALSE	FALSE	FALSE	FALSE
ENSDARG00000096750	FALSE	FALSE	FALSE	FALSE
ENSDARG00000074098	FALSE	FALSE	FALSE	TRUE
ENSDARG00000110196	FALSE	FALSE	FALSE	FALSE
ENSDARG00000069829	FALSE	FALSE	FALSE	FALSE
ENSDARG00000069774	FALSE	FALSE	FALSE	FALSE
ENSDARG00000034685	FALSE	FALSE	FALSE	FALSE
ENSDARG00000056387	FALSE	FALSE	FALSE	FALSE
ENSDARG00000092337	FALSE	TRUE	FALSE	TRUE
ENSDARG00000044902	FALSE	FALSE	FALSE	FALSE
ENSDARG00000112824	FALSE	FALSE	FALSE	FALSE
ENSDARG00000100573	FALSE	FALSE	FALSE	FALSE
ENSDARG00000070412	FALSE	FALSE	FALSE	FALSE
ENSDARG00000096383	FALSE	FALSE	FALSE	FALSE
ENSDARG00000016132	FALSE	FALSE	FALSE	FALSE
ENSDARG00000094696	FALSE	FALSE	FALSE	FALSE
ENSDARG00000075641	FALSE	FALSE	FALSE	FALSE
ENSDARG00000058606	FALSE	FALSE	FALSE	FALSE
ENSDARG00000104239	FALSE	FALSE	FALSE	FALSE
ENSDARG00000021985	FALSE	FALSE	FALSE	TRUE
ENSDARG00000117335	FALSE	FALSE	FALSE	FALSE
ENSDARG00000114186	FALSE	FALSE	FALSE	FALSE
ENSDARG00000111615	FALSE	FALSE	FALSE	FALSE
ENSDARG00000014386	FALSE	FALSE	FALSE	FALSE
ENSDARG00000054906	TRUE	TRUE	FALSE	FALSE
ENSDARG00000010946	FALSE	FALSE	FALSE	TRUE
ENSDARG00000043105	FALSE	FALSE	FALSE	FALSE
ENSDARG00000044155	FALSE	FALSE	FALSE	FALSE
ENSDARG00000109323	FALSE	FALSE	FALSE	FALSE
ENSDARG00000013655	FALSE	FALSE	FALSE	FALSE
ENSDARG00000095830	FALSE	FALSE	FALSE	FALSE
ENSDARG00000063264	FALSE	FALSE	FALSE	FALSE
ENSDARG00000013310	FALSE	FALSE	FALSE	FALSE
ENSDARG00000010779	FALSE	FALSE	FALSE	FALSE
ENSDARG00000095080	FALSE	FALSE	FALSE	FALSE
ENSDARG00000101844	FALSE	FALSE	FALSE	FALSE
ENSDARG00000007034	FALSE	FALSE	FALSE	FALSE
ENSDARG00000096951	FALSE	FALSE	FALSE	FALSE
ENSDARG00000012458	TRUE	FALSE	FALSE	FALSE
ENSDARG00000093254	FALSE	FALSE	FALSE	FALSE
ENSDARG00000074305	FALSE	FALSE	FALSE	FALSE
ENSDARG00000043873	FALSE	FALSE	FALSE	FALSE
ENSDARG00000070126	FALSE	FALSE	FALSE	TRUE
ENSDARG00000098835	FALSE	FALSE	FALSE	FALSE
ENSDARG00000113187	FALSE	FALSE	FALSE	FALSE
ENSDARG00000099757	FALSE	FALSE	FALSE	FALSE
ENSDARG00000113240	FALSE	FALSE	FALSE	FALSE
ENSDARG00000001898	FALSE	FALSE	FALSE	FALSE
ENSDARG00000033138	FALSE	FALSE	FALSE	FALSE
ENSDARG00000015803	FALSE	FALSE	FALSE	FALSE
ENSDARG00000030224	FALSE	FALSE	FALSE	FALSE
ENSDARG00000008457	FALSE	FALSE	FALSE	FALSE
ENSDARG00000101051	FALSE	FALSE	FALSE	FALSE
ENSDARG00000007369	FALSE	FALSE	FALSE	FALSE
ENSDARG00000112345	FALSE	FALSE	FALSE	FALSE
ENSDARG00000062421	FALSE	FALSE	FALSE	FALSE
ENSDARG00000089345	FALSE	FALSE	FALSE	FALSE
ENSDARG00000034427	FALSE	FALSE	FALSE	FALSE
ENSDARG00000080188	FALSE	FALSE	FALSE	FALSE
ENSDARG00000043821	FALSE	FALSE	FALSE	FALSE
ENSDARG00000069376	FALSE	FALSE	FALSE	FALSE
ENSDARG00000045131	FALSE	FALSE	FALSE	TRUE
ENSDARG00000055365	FALSE	FALSE	FALSE	FALSE
ENSDARG00000101330	FALSE	FALSE	FALSE	FALSE
ENSDARG00000097666	FALSE	FALSE	FALSE	FALSE
ENSDARG00000104393	FALSE	FALSE	FALSE	FALSE
ENSDARG00000109860	FALSE	FALSE	FALSE	FALSE
ENSDARG00000042410	FALSE	FALSE	FALSE	FALSE
ENSDARG00000077468	FALSE	FALSE	FALSE	FALSE
ENSDARG00000094688	FALSE	FALSE	FALSE	FALSE
ENSDARG00000099970	FALSE	FALSE	FALSE	FALSE
ENSDARG00000009134	FALSE	FALSE	FALSE	FALSE
ENSDARG00000063701	FALSE	FALSE	FALSE	FALSE
ENSDARG00000002826	FALSE	FALSE	FALSE	FALSE
ENSDARG00000052480	FALSE	FALSE	FALSE	TRUE
ENSDARG00000058966	FALSE	FALSE	TRUE	TRUE
ENSDARG00000078959	FALSE	FALSE	FALSE	FALSE
ENSDARG00000017591	FALSE	FALSE	FALSE	FALSE
ENSDARG00000113283	FALSE	FALSE	FALSE	FALSE
ENSDARG00000081850	FALSE	FALSE	FALSE	FALSE
ENSDARG00000060054	FALSE	FALSE	FALSE	FALSE
ENSDARG00000102808	FALSE	FALSE	FALSE	FALSE
ENSDARG00000078227	FALSE	FALSE	FALSE	FALSE
ENSDARG00000060853	FALSE	FALSE	FALSE	FALSE
ENSDARG00000030479	FALSE	FALSE	FALSE	FALSE
ENSDARG00000078784	FALSE	FALSE	FALSE	TRUE
ENSDARG00000046106	FALSE	FALSE	FALSE	FALSE
ENSDARG00000004402	FALSE	FALSE	FALSE	FALSE
ENSDARG00000002591	FALSE	FALSE	FALSE	TRUE
ENSDARG00000070339	FALSE	FALSE	FALSE	FALSE
ENSDARG00000052696	FALSE	FALSE	FALSE	FALSE
ENSDARG00000094879	FALSE	FALSE	FALSE	FALSE
ENSDARG00000075126	FALSE	FALSE	FALSE	FALSE
ENSDARG00000029865	FALSE	FALSE	FALSE	TRUE
ENSDARG00000075599	FALSE	FALSE	FALSE	FALSE
ENSDARG00000098860	FALSE	FALSE	FALSE	FALSE
ENSDARG00000016173	FALSE	FALSE	FALSE	TRUE
ENSDARG00000092158	FALSE	FALSE	FALSE	FALSE
ENSDARG00000116616	FALSE	FALSE	FALSE	FALSE
ENSDARG00000062042	FALSE	FALSE	FALSE	FALSE
ENSDARG00000010773	FALSE	FALSE	FALSE	FALSE
ENSDARG00000102470	FALSE	FALSE	FALSE	FALSE
ENSDARG00000012942	FALSE	FALSE	FALSE	TRUE
ENSDARG00000093438	FALSE	FALSE	FALSE	FALSE
ENSDARG00000016765	FALSE	FALSE	FALSE	FALSE
ENSDARG00000021239	FALSE	FALSE	FALSE	FALSE
ENSDARG00000096538	FALSE	FALSE	FALSE	FALSE
ENSDARG00000069928	FALSE	FALSE	FALSE	FALSE
ENSDARG00000089388	FALSE	FALSE	FALSE	FALSE
ENSDARG00000056519	FALSE	FALSE	FALSE	FALSE
ENSDARG00000075625	FALSE	FALSE	FALSE	FALSE
ENSDARG00000085985	FALSE	FALSE	FALSE	FALSE
ENSDARG00000070504	FALSE	FALSE	FALSE	FALSE
ENSDARG00000100087	FALSE	FALSE	FALSE	FALSE
ENSDARG00000091902	FALSE	FALSE	FALSE	TRUE
ENSDARG00000041098	FALSE	FALSE	FALSE	FALSE
ENSDARG00000098078	FALSE	FALSE	FALSE	FALSE
ENSDARG00000112536	FALSE	FALSE	FALSE	FALSE
ENSDARG00000017154	FALSE	FALSE	FALSE	FALSE
ENSDARG00000002840	FALSE	FALSE	FALSE	FALSE
ENSDARG00000117618	FALSE	FALSE	FALSE	FALSE
ENSDARG00000071065	FALSE	FALSE	FALSE	FALSE
ENSDARG00000069114	FALSE	FALSE	FALSE	FALSE
ENSDARG00000097940	FALSE	FALSE	FALSE	FALSE
ENSDARG00000019004	FALSE	FALSE	FALSE	TRUE
ENSDARG00000102266	FALSE	FALSE	FALSE	FALSE
ENSDARG00000058094	FALSE	FALSE	FALSE	FALSE
ENSDARG00000023648	FALSE	FALSE	FALSE	FALSE
ENSDARG00000042671	FALSE	FALSE	FALSE	FALSE
ENSDARG00000024398	FALSE	FALSE	FALSE	FALSE
ENSDARG00000073741	FALSE	FALSE	FALSE	FALSE
ENSDARG00000093605	FALSE	FALSE	FALSE	FALSE
ENSDARG00000062909	FALSE	FALSE	FALSE	TRUE
ENSDARG00000035952	FALSE	FALSE	FALSE	FALSE
ENSDARG00000016548	FALSE	FALSE	FALSE	TRUE
ENSDARG00000113435	FALSE	FALSE	FALSE	FALSE
ENSDARG00000020625	FALSE	FALSE	FALSE	FALSE
ENSDARG00000088332	FALSE	FALSE	FALSE	FALSE
ENSDARG00000098852	FALSE	FALSE	FALSE	FALSE
ENSDARG00000052537	FALSE	FALSE	FALSE	FALSE
ENSDARG00000079110	FALSE	FALSE	FALSE	FALSE
ENSDARG00000105114	FALSE	FALSE	FALSE	FALSE
ENSDARG00000054680	FALSE	FALSE	FALSE	FALSE
ENSDARG00000043317	FALSE	FALSE	FALSE	FALSE
ENSDARG00000056532	FALSE	FALSE	FALSE	FALSE
ENSDARG00000026664	FALSE	FALSE	FALSE	TRUE
ENSDARG00000060398	FALSE	FALSE	FALSE	FALSE
ENSDARG00000040157	FALSE	FALSE	FALSE	FALSE
ENSDARG00000102626	FALSE	FALSE	FALSE	FALSE
ENSDARG00000067607	FALSE	FALSE	FALSE	FALSE
ENSDARG00000005772	FALSE	FALSE	FALSE	FALSE
ENSDARG00000036069	FALSE	FALSE	FALSE	FALSE
ENSDARG00000011515	FALSE	FALSE	FALSE	FALSE
ENSDARG00000094980	FALSE	FALSE	FALSE	FALSE
ENSDARG00000013117	FALSE	FALSE	FALSE	FALSE
ENSDARG00000022176	FALSE	FALSE	FALSE	FALSE
ENSDARG00000016886	FALSE	FALSE	FALSE	FALSE
ENSDARG00000009637	FALSE	FALSE	FALSE	FALSE
ENSDARG00000089838	FALSE	FALSE	FALSE	FALSE
ENSDARG00000078226	FALSE	FALSE	FALSE	FALSE
ENSDARG00000077040	FALSE	FALSE	FALSE	FALSE
ENSDARG00000103953	FALSE	FALSE	FALSE	FALSE
ENSDARG00000069926	FALSE	FALSE	FALSE	FALSE
ENSDARG00000070675	FALSE	FALSE	FALSE	TRUE
ENSDARG00000062745	FALSE	FALSE	FALSE	FALSE
ENSDARG00000058857	FALSE	FALSE	FALSE	FALSE
ENSDARG00000013250	FALSE	FALSE	FALSE	TRUE
ENSDARG00000105693	FALSE	FALSE	FALSE	FALSE
ENSDARG00000096541	FALSE	FALSE	FALSE	FALSE
ENSDARG00000101510	FALSE	FALSE	FALSE	FALSE
ENSDARG00000042123	FALSE	FALSE	FALSE	FALSE
ENSDARG00000017230	FALSE	FALSE	FALSE	FALSE
ENSDARG00000053263	FALSE	FALSE	FALSE	FALSE
ENSDARG00000115792	FALSE	FALSE	FALSE	FALSE
ENSDARG00000076729	FALSE	FALSE	FALSE	FALSE
ENSDARG00000057949	FALSE	FALSE	FALSE	TRUE
ENSDARG00000086551	FALSE	FALSE	FALSE	FALSE
ENSDARG00000091150	FALSE	FALSE	FALSE	FALSE
ENSDARG00000042031	FALSE	FALSE	FALSE	FALSE
ENSDARG00000021789	FALSE	FALSE	FALSE	FALSE
ENSDARG00000022532	FALSE	FALSE	FALSE	FALSE
ENSDARG00000102717	FALSE	FALSE	FALSE	FALSE
ENSDARG00000011665	FALSE	FALSE	FALSE	TRUE
ENSDARG00000037101	FALSE	FALSE	FALSE	FALSE
ENSDARG00000075526	FALSE	FALSE	FALSE	FALSE
ENSDARG00000008487	FALSE	FALSE	FALSE	FALSE

## Sheet: Nanog post-MBT new target
Gene	first-wave transcribed genes	early ZGA genes	down-regulated in nanog MO 4hpf (Lee, et al. 2013 Nature)	down-regulated in nanog MO 6hpf (Lee, et al. 2013 Nature)
ENSDARG00000086405	FALSE	FALSE	FALSE	FALSE
ENSDARG00000034896	FALSE	FALSE	FALSE	FALSE
ENSDARG00000089913	FALSE	FALSE	FALSE	FALSE
ENSDARG00000019498	FALSE	FALSE	FALSE	FALSE
ENSDARG00000077850	FALSE	FALSE	FALSE	FALSE
ENSDARG00000042851	FALSE	FALSE	FALSE	TRUE
ENSDARG00000011373	FALSE	FALSE	FALSE	FALSE
ENSDARG00000077712	TRUE	TRUE	TRUE	TRUE
ENSDARG00000078108	FALSE	FALSE	FALSE	FALSE
ENSDARG00000076348	FALSE	FALSE	FALSE	FALSE
ENSDARG00000112334	FALSE	FALSE	FALSE	FALSE
ENSDARG00000092448	FALSE	FALSE	FALSE	FALSE
ENSDARG00000045289	FALSE	FALSE	FALSE	FALSE
ENSDARG00000006514	FALSE	FALSE	FALSE	FALSE
ENSDARG00000098328	FALSE	FALSE	FALSE	FALSE
ENSDARG00000057590	FALSE	FALSE	FALSE	FALSE
ENSDARG00000062457	FALSE	FALSE	FALSE	TRUE
ENSDARG00000070571	FALSE	FALSE	FALSE	FALSE
ENSDARG00000012141	FALSE	FALSE	FALSE	TRUE
ENSDARG00000014531	FALSE	FALSE	FALSE	FALSE
ENSDARG00000036811	FALSE	FALSE	FALSE	FALSE
ENSDARG00000042261	FALSE	FALSE	FALSE	FALSE
ENSDARG00000096315	FALSE	FALSE	FALSE	FALSE
ENSDARG00000013063	FALSE	FALSE	FALSE	FALSE
ENSDARG00000076364	FALSE	FALSE	FALSE	FALSE
ENSDARG00000027599	FALSE	FALSE	FALSE	FALSE
ENSDARG00000053713	FALSE	FALSE	FALSE	FALSE
ENSDARG00000058558	FALSE	FALSE	FALSE	FALSE
ENSDARG00000063030	FALSE	FALSE	FALSE	FALSE
ENSDARG00000026834	FALSE	FALSE	FALSE	FALSE
ENSDARG00000101076	FALSE	FALSE	FALSE	FALSE
ENSDARG00000056601	FALSE	FALSE	FALSE	FALSE
ENSDARG00000060207	FALSE	FALSE	FALSE	FALSE
ENSDARG00000100678	FALSE	FALSE	FALSE	FALSE
ENSDARG00000020261	FALSE	FALSE	FALSE	FALSE
ENSDARG00000043285	FALSE	FALSE	FALSE	FALSE
ENSDARG00000093366	FALSE	FALSE	FALSE	FALSE
ENSDARG00000101914	FALSE	FALSE	FALSE	FALSE
ENSDARG00000078309	FALSE	FALSE	FALSE	FALSE
ENSDARG00000003462	FALSE	FALSE	FALSE	FALSE
ENSDARG00000105355	FALSE	FALSE	FALSE	FALSE
ENSDARG00000090190	FALSE	FALSE	FALSE	FALSE
ENSDARG00000094423	FALSE	FALSE	FALSE	FALSE
ENSDARG00000095732	FALSE	FALSE	FALSE	FALSE
ENSDARG00000026862	FALSE	FALSE	FALSE	FALSE
ENSDARG00000005675	FALSE	FALSE	FALSE	FALSE
ENSDARG00000102798	FALSE	FALSE	FALSE	FALSE
ENSDARG00000103112	FALSE	FALSE	FALSE	FALSE
ENSDARG00000009273	FALSE	FALSE	FALSE	TRUE
ENSDARG00000092423	FALSE	FALSE	FALSE	FALSE
ENSDARG00000061169	FALSE	FALSE	FALSE	TRUE
ENSDARG00000019976	FALSE	FALSE	FALSE	FALSE
ENSDARG00000075569	FALSE	FALSE	FALSE	FALSE
ENSDARG00000081095	FALSE	FALSE	FALSE	FALSE
ENSDARG00000062967	FALSE	FALSE	FALSE	FALSE
ENSDARG00000089456	FALSE	FALSE	FALSE	FALSE
ENSDARG00000100623	FALSE	FALSE	FALSE	FALSE
ENSDARG00000013397	FALSE	FALSE	FALSE	FALSE
ENSDARG00000114676	FALSE	FALSE	FALSE	FALSE
ENSDARG00000113225	FALSE	FALSE	FALSE	FALSE
ENSDARG00000075842	FALSE	FALSE	FALSE	FALSE
ENSDARG00000094046	FALSE	FALSE	FALSE	FALSE
ENSDARG00000004074	FALSE	FALSE	FALSE	FALSE
ENSDARG00000081904	FALSE	FALSE	FALSE	FALSE
ENSDARG00000009942	FALSE	FALSE	FALSE	TRUE
ENSDARG00000031658	FALSE	FALSE	FALSE	FALSE
ENSDARG00000088539	FALSE	FALSE	FALSE	FALSE
ENSDARG00000080152	FALSE	FALSE	FALSE	FALSE
ENSDARG00000010098	FALSE	FALSE	FALSE	FALSE
ENSDARG00000019233	FALSE	FALSE	FALSE	FALSE
ENSDARG00000040984	FALSE	FALSE	FALSE	FALSE
ENSDARG00000016743	FALSE	FALSE	FALSE	FALSE
ENSDARG00000043474	FALSE	FALSE	FALSE	FALSE
ENSDARG00000068868	FALSE	FALSE	FALSE	FALSE
ENSDARG00000014003	FALSE	FALSE	FALSE	TRUE
ENSDARG00000099368	FALSE	FALSE	FALSE	FALSE
ENSDARG00000076687	FALSE	FALSE	FALSE	FALSE
ENSDARG00000077858	FALSE	FALSE	FALSE	FALSE
ENSDARG00000105431	FALSE	FALSE	FALSE	FALSE
ENSDARG00000001621	FALSE	FALSE	FALSE	FALSE
ENSDARG00000027589	FALSE	FALSE	FALSE	FALSE
ENSDARG00000010021	FALSE	FALSE	FALSE	FALSE
ENSDARG00000007278	FALSE	FALSE	FALSE	FALSE
ENSDARG00000042839	FALSE	FALSE	FALSE	FALSE
ENSDARG00000027813	FALSE	FALSE	FALSE	FALSE
ENSDARG00000020454	FALSE	FALSE	FALSE	TRUE
ENSDARG00000099257	FALSE	FALSE	FALSE	FALSE
ENSDARG00000003607	FALSE	FALSE	FALSE	FALSE
ENSDARG00000045935	FALSE	FALSE	FALSE	FALSE
ENSDARG00000019838	FALSE	FALSE	FALSE	FALSE
ENSDARG00000079876	FALSE	FALSE	FALSE	FALSE
ENSDARG00000069135	TRUE	TRUE	FALSE	TRUE
ENSDARG00000035810	FALSE	FALSE	FALSE	TRUE
ENSDARG00000060120	FALSE	FALSE	FALSE	FALSE
ENSDARG00000013333	FALSE	FALSE	FALSE	TRUE
ENSDARG00000096306	FALSE	FALSE	FALSE	FALSE
ENSDARG00000054213	FALSE	FALSE	FALSE	TRUE
ENSDARG00000101244	FALSE	FALSE	FALSE	FALSE
ENSDARG00000014465	FALSE	FALSE	FALSE	FALSE
ENSDARG00000052641	FALSE	FALSE	FALSE	TRUE
ENSDARG00000023031	FALSE	FALSE	FALSE	FALSE
ENSDARG00000083431	FALSE	FALSE	FALSE	FALSE
ENSDARG00000007245	FALSE	FALSE	FALSE	FALSE
ENSDARG00000007764	FALSE	FALSE	FALSE	FALSE
ENSDARG00000117556	FALSE	FALSE	FALSE	FALSE
ENSDARG00000041699	FALSE	FALSE	FALSE	FALSE
ENSDARG00000088351	FALSE	FALSE	FALSE	FALSE
ENSDARG00000101380	FALSE	FALSE	FALSE	FALSE
ENSDARG00000009693	FALSE	FALSE	FALSE	TRUE
ENSDARG00000094514	FALSE	FALSE	FALSE	FALSE
ENSDARG00000083247	FALSE	FALSE	FALSE	FALSE
ENSDARG00000068199	FALSE	FALSE	FALSE	FALSE
ENSDARG00000057058	FALSE	FALSE	FALSE	FALSE
ENSDARG00000058937	FALSE	FALSE	FALSE	FALSE
ENSDARG00000037675	FALSE	FALSE	FALSE	TRUE
ENSDARG00000097027	FALSE	FALSE	FALSE	FALSE
ENSDARG00000074244	FALSE	FALSE	FALSE	FALSE
ENSDARG00000015015	FALSE	FALSE	FALSE	TRUE
ENSDARG00000095857	FALSE	FALSE	FALSE	FALSE
ENSDARG00000010266	FALSE	FALSE	FALSE	TRUE
ENSDARG00000005576	FALSE	FALSE	FALSE	TRUE
ENSDARG00000104037	FALSE	FALSE	FALSE	FALSE
ENSDARG00000067984	FALSE	FALSE	FALSE	FALSE
ENSDARG00000088828	FALSE	FALSE	FALSE	FALSE
ENSDARG00000079183	FALSE	FALSE	FALSE	FALSE
ENSDARG00000073841	FALSE	FALSE	FALSE	FALSE
ENSDARG00000069109	FALSE	FALSE	FALSE	FALSE
ENSDARG00000009557	FALSE	FALSE	FALSE	FALSE
ENSDARG00000099692	FALSE	FALSE	FALSE	FALSE
ENSDARG00000113479	FALSE	FALSE	FALSE	FALSE
ENSDARG00000079067	FALSE	FALSE	FALSE	FALSE
ENSDARG00000021135	FALSE	FALSE	FALSE	FALSE
ENSDARG00000102310	FALSE	FALSE	FALSE	FALSE
ENSDARG00000010941	FALSE	FALSE	FALSE	FALSE
ENSDARG00000095844	FALSE	FALSE	FALSE	FALSE
ENSDARG00000044301	FALSE	FALSE	FALSE	FALSE
ENSDARG00000070127	FALSE	FALSE	FALSE	FALSE
ENSDARG00000018296	FALSE	FALSE	FALSE	FALSE
ENSDARG00000039900	FALSE	FALSE	FALSE	FALSE
ENSDARG00000093569	FALSE	FALSE	FALSE	TRUE
ENSDARG00000005980	FALSE	FALSE	FALSE	FALSE
ENSDARG00000059510	FALSE	FALSE	FALSE	FALSE
ENSDARG00000056193	FALSE	FALSE	FALSE	FALSE
ENSDARG00000103046	FALSE	FALSE	FALSE	FALSE
ENSDARG00000104468	FALSE	FALSE	FALSE	FALSE
ENSDARG00000115096	FALSE	FALSE	FALSE	FALSE
ENSDARG00000105079	FALSE	FALSE	FALSE	FALSE
ENSDARG00000037706	FALSE	FALSE	FALSE	FALSE
ENSDARG00000114798	FALSE	FALSE	FALSE	FALSE
ENSDARG00000109717	FALSE	FALSE	FALSE	FALSE
ENSDARG00000110357	FALSE	FALSE	FALSE	FALSE
ENSDARG00000060500	FALSE	FALSE	FALSE	FALSE
ENSDARG00000043687	FALSE	FALSE	FALSE	FALSE
ENSDARG00000077029	FALSE	FALSE	FALSE	FALSE
ENSDARG00000019564	FALSE	FALSE	FALSE	FALSE
ENSDARG00000019774	FALSE	FALSE	FALSE	FALSE
ENSDARG00000058729	FALSE	FALSE	FALSE	FALSE
ENSDARG00000070404	FALSE	FALSE	FALSE	TRUE
ENSDARG00000075517	FALSE	FALSE	FALSE	FALSE
ENSDARG00000052856	TRUE	TRUE	TRUE	TRUE
ENSDARG00000080698	FALSE	FALSE	FALSE	FALSE
ENSDARG00000039150	FALSE	FALSE	FALSE	FALSE
ENSDARG00000058354	FALSE	FALSE	FALSE	FALSE
ENSDARG00000013800	FALSE	FALSE	FALSE	FALSE
ENSDARG00000090977	FALSE	FALSE	FALSE	FALSE
ENSDARG00000075854	FALSE	FALSE	FALSE	FALSE
ENSDARG00000060380	FALSE	FALSE	FALSE	FALSE
ENSDARG00000101478	FALSE	FALSE	FALSE	FALSE
ENSDARG00000017874	FALSE	FALSE	FALSE	FALSE
ENSDARG00000056801	FALSE	FALSE	FALSE	FALSE
ENSDARG00000096270	FALSE	FALSE	FALSE	FALSE
ENSDARG00000076735	FALSE	FALSE	FALSE	FALSE
ENSDARG00000027649	FALSE	FALSE	FALSE	FALSE
ENSDARG00000020957	FALSE	FALSE	FALSE	FALSE
ENSDARG00000029952	FALSE	FALSE	FALSE	TRUE
ENSDARG00000032614	FALSE	FALSE	FALSE	FALSE
ENSDARG00000045669	FALSE	FALSE	FALSE	FALSE
ENSDARG00000011662	FALSE	FALSE	FALSE	FALSE
ENSDARG00000052450	FALSE	FALSE	FALSE	FALSE
ENSDARG00000095385	FALSE	FALSE	FALSE	FALSE
ENSDARG00000051857	FALSE	FALSE	FALSE	FALSE
ENSDARG00000042291	FALSE	FALSE	FALSE	FALSE
ENSDARG00000103379	FALSE	FALSE	FALSE	FALSE
ENSDARG00000075556	FALSE	FALSE	FALSE	FALSE
ENSDARG00000044491	FALSE	FALSE	FALSE	FALSE
ENSDARG00000092122	FALSE	FALSE	FALSE	FALSE
ENSDARG00000113056	FALSE	FALSE	FALSE	FALSE
ENSDARG00000062995	FALSE	FALSE	FALSE	FALSE
ENSDARG00000042946	FALSE	FALSE	FALSE	FALSE
ENSDARG00000103453	FALSE	FALSE	FALSE	FALSE
ENSDARG00000053301	FALSE	FALSE	FALSE	FALSE
ENSDARG00000103278	FALSE	FALSE	FALSE	FALSE
ENSDARG00000116122	FALSE	FALSE	FALSE	FALSE
ENSDARG00000079415	FALSE	FALSE	FALSE	FALSE
ENSDARG00000096539	FALSE	FALSE	FALSE	FALSE
ENSDARG00000036291	FALSE	FALSE	FALSE	FALSE
ENSDARG00000105718	FALSE	FALSE	FALSE	FALSE
ENSDARG00000095304	FALSE	FALSE	FALSE	FALSE
ENSDARG00000013087	FALSE	FALSE	FALSE	FALSE
ENSDARG00000103220	FALSE	FALSE	FALSE	FALSE
ENSDARG00000007231	FALSE	FALSE	FALSE	TRUE
ENSDARG00000101831	FALSE	FALSE	FALSE	FALSE
ENSDARG00000052766	FALSE	FALSE	FALSE	FALSE
ENSDARG00000068978	FALSE	FALSE	FALSE	FALSE
ENSDARG00000103015	FALSE	FALSE	FALSE	FALSE
ENSDARG00000095026	FALSE	FALSE	FALSE	FALSE
ENSDARG00000058128	FALSE	FALSE	FALSE	FALSE
ENSDARG00000075977	FALSE	FALSE	FALSE	FALSE
ENSDARG00000081078	FALSE	FALSE	FALSE	FALSE
ENSDARG00000104701	FALSE	FALSE	FALSE	FALSE
ENSDARG00000070939	FALSE	FALSE	FALSE	FALSE
ENSDARG00000045304	FALSE	FALSE	FALSE	FALSE
ENSDARG00000017772	FALSE	FALSE	FALSE	FALSE
ENSDARG00000038731	FALSE	FALSE	FALSE	FALSE
ENSDARG00000070981	FALSE	FALSE	FALSE	FALSE
ENSDARG00000077101	FALSE	FALSE	FALSE	FALSE
ENSDARG00000039701	FALSE	FALSE	FALSE	FALSE
ENSDARG00000071678	FALSE	FALSE	FALSE	FALSE
ENSDARG00000077341	FALSE	FALSE	FALSE	FALSE
ENSDARG00000054849	FALSE	FALSE	FALSE	FALSE
ENSDARG00000076896	FALSE	FALSE	FALSE	FALSE
ENSDARG00000043342	FALSE	FALSE	FALSE	FALSE
ENSDARG00000003699	FALSE	FALSE	FALSE	FALSE
ENSDARG00000042902	FALSE	FALSE	FALSE	FALSE
ENSDARG00000054864	FALSE	FALSE	FALSE	FALSE
ENSDARG00000039490	FALSE	FALSE	FALSE	FALSE
ENSDARG00000076657	FALSE	FALSE	FALSE	FALSE
ENSDARG00000040008	FALSE	FALSE	FALSE	FALSE
ENSDARG00000046030	FALSE	FALSE	FALSE	FALSE
ENSDARG00000105585	FALSE	FALSE	FALSE	FALSE
ENSDARG00000038205	FALSE	FALSE	FALSE	FALSE
ENSDARG00000023989	FALSE	FALSE	FALSE	FALSE
ENSDARG00000092896	FALSE	FALSE	FALSE	FALSE
ENSDARG00000081311	FALSE	FALSE	FALSE	FALSE
ENSDARG00000005185	FALSE	FALSE	FALSE	TRUE
ENSDARG00000081976	FALSE	FALSE	FALSE	FALSE
ENSDARG00000006896	FALSE	FALSE	FALSE	FALSE
ENSDARG00000096352	FALSE	FALSE	FALSE	FALSE
ENSDARG00000079760	FALSE	FALSE	FALSE	TRUE
ENSDARG00000043242	FALSE	FALSE	FALSE	TRUE
ENSDARG00000111753	FALSE	FALSE	FALSE	FALSE
ENSDARG00000100221	FALSE	FALSE	FALSE	FALSE
ENSDARG00000002031	FALSE	FALSE	FALSE	FALSE
ENSDARG00000070839	FALSE	FALSE	FALSE	FALSE
ENSDARG00000039269	FALSE	TRUE	FALSE	FALSE
ENSDARG00000102501	FALSE	FALSE	FALSE	FALSE
ENSDARG00000030644	FALSE	FALSE	FALSE	FALSE
ENSDARG00000037071	FALSE	FALSE	FALSE	TRUE
ENSDARG00000109897	FALSE	FALSE	FALSE	FALSE
ENSDARG00000025607	FALSE	FALSE	FALSE	FALSE
ENSDARG00000041581	FALSE	FALSE	FALSE	FALSE
ENSDARG00000059351	FALSE	FALSE	FALSE	FALSE
ENSDARG00000100952	FALSE	FALSE	FALSE	FALSE
ENSDARG00000101559	FALSE	FALSE	FALSE	FALSE
ENSDARG00000061644	FALSE	FALSE	FALSE	FALSE
ENSDARG00000041199	FALSE	FALSE	FALSE	FALSE
ENSDARG00000036868	FALSE	FALSE	FALSE	TRUE
ENSDARG00000051836	FALSE	FALSE	FALSE	FALSE
ENSDARG00000021193	FALSE	FALSE	FALSE	FALSE
ENSDARG00000057037	FALSE	FALSE	FALSE	FALSE
ENSDARG00000101717	FALSE	FALSE	FALSE	FALSE
ENSDARG00000046022	FALSE	FALSE	FALSE	FALSE
ENSDARG00000015732	FALSE	FALSE	FALSE	FALSE
ENSDARG00000037154	FALSE	FALSE	FALSE	FALSE
ENSDARG00000070607	FALSE	FALSE	FALSE	FALSE
ENSDARG00000012407	FALSE	FALSE	FALSE	FALSE
ENSDARG00000107337	FALSE	FALSE	FALSE	FALSE
ENSDARG00000036784	FALSE	FALSE	FALSE	FALSE
ENSDARG00000042467	FALSE	FALSE	FALSE	TRUE
ENSDARG00000053460	FALSE	FALSE	FALSE	FALSE
ENSDARG00000071658	FALSE	FALSE	FALSE	TRUE
ENSDARG00000008859	FALSE	FALSE	FALSE	TRUE
ENSDARG00000034493	FALSE	FALSE	FALSE	FALSE
ENSDARG00000026753	FALSE	FALSE	FALSE	FALSE
ENSDARG00000039439	FALSE	FALSE	FALSE	FALSE
ENSDARG00000037259	FALSE	FALSE	FALSE	FALSE
ENSDARG00000034855	FALSE	FALSE	FALSE	TRUE
ENSDARG00000011696	FALSE	FALSE	FALSE	FALSE
ENSDARG00000103274	FALSE	FALSE	FALSE	FALSE
ENSDARG00000040564	FALSE	FALSE	FALSE	TRUE
ENSDARG00000100446	FALSE	FALSE	FALSE	FALSE
ENSDARG00000091003	FALSE	FALSE	FALSE	TRUE
ENSDARG00000117297	FALSE	FALSE	FALSE	FALSE
ENSDARG00000074807	FALSE	FALSE	FALSE	TRUE
ENSDARG00000060308	FALSE	FALSE	FALSE	FALSE
ENSDARG00000070453	FALSE	FALSE	FALSE	FALSE
ENSDARG00000042345	FALSE	FALSE	FALSE	FALSE
ENSDARG00000071458	FALSE	FALSE	FALSE	FALSE
ENSDARG00000035869	FALSE	FALSE	FALSE	TRUE
ENSDARG00000092949	FALSE	FALSE	FALSE	FALSE
ENSDARG00000089302	FALSE	TRUE	FALSE	TRUE
ENSDARG00000008966	FALSE	FALSE	FALSE	FALSE
ENSDARG00000053554	FALSE	FALSE	FALSE	FALSE
ENSDARG00000075666	FALSE	TRUE	FALSE	FALSE
ENSDARG00000006921	FALSE	FALSE	FALSE	FALSE
ENSDARG00000100697	FALSE	FALSE	FALSE	FALSE
ENSDARG00000063169	FALSE	FALSE	FALSE	FALSE
ENSDARG00000006624	FALSE	FALSE	FALSE	TRUE
ENSDARG00000005590	FALSE	FALSE	FALSE	TRUE
ENSDARG00000078675	FALSE	FALSE	FALSE	TRUE
ENSDARG00000006332	FALSE	FALSE	FALSE	FALSE
ENSDARG00000075165	FALSE	FALSE	FALSE	FALSE
ENSDARG00000082942	FALSE	FALSE	FALSE	FALSE
ENSDARG00000097465	FALSE	FALSE	FALSE	FALSE
ENSDARG00000096658	FALSE	FALSE	FALSE	FALSE
ENSDARG00000096933	FALSE	FALSE	FALSE	FALSE
ENSDARG00000094133	FALSE	FALSE	FALSE	FALSE
ENSDARG00000061603	FALSE	FALSE	FALSE	FALSE
ENSDARG00000094192	FALSE	FALSE	FALSE	FALSE
ENSDARG00000078890	FALSE	FALSE	FALSE	FALSE
ENSDARG00000090690	FALSE	FALSE	FALSE	FALSE
ENSDARG00000039434	FALSE	FALSE	FALSE	FALSE
ENSDARG00000102674	FALSE	FALSE	FALSE	FALSE
ENSDARG00000053127	FALSE	FALSE	TRUE	TRUE
ENSDARG00000038687	FALSE	FALSE	FALSE	FALSE
ENSDARG00000011703	FALSE	FALSE	FALSE	FALSE
ENSDARG00000056550	FALSE	FALSE	FALSE	FALSE
ENSDARG00000026395	FALSE	FALSE	FALSE	FALSE
ENSDARG00000096879	FALSE	FALSE	FALSE	FALSE
ENSDARG00000110611	FALSE	FALSE	FALSE	FALSE
ENSDARG00000018898	FALSE	TRUE	FALSE	TRUE
ENSDARG00000088835	FALSE	TRUE	FALSE	TRUE
ENSDARG00000099376	FALSE	FALSE	FALSE	FALSE
ENSDARG00000010194	FALSE	FALSE	FALSE	TRUE
ENSDARG00000021916	FALSE	FALSE	FALSE	FALSE
ENSDARG00000097153	FALSE	FALSE	FALSE	FALSE
ENSDARG00000020676	FALSE	FALSE	FALSE	FALSE
ENSDARG00000105748	FALSE	FALSE	FALSE	FALSE
ENSDARG00000036774	FALSE	FALSE	FALSE	FALSE
ENSDARG00000062954	FALSE	FALSE	FALSE	FALSE
ENSDARG00000014041	FALSE	FALSE	FALSE	TRUE
ENSDARG00000016745	FALSE	FALSE	FALSE	FALSE
ENSDARG00000007377	FALSE	FALSE	FALSE	FALSE
ENSDARG00000076228	FALSE	FALSE	FALSE	FALSE
ENSDARG00000074456	FALSE	FALSE	FALSE	FALSE
ENSDARG00000032617	FALSE	FALSE	FALSE	FALSE
ENSDARG00000008494	FALSE	FALSE	FALSE	TRUE
ENSDARG00000104657	FALSE	FALSE	FALSE	FALSE
ENSDARG00000077877	TRUE	TRUE	FALSE	FALSE
ENSDARG00000099510	FALSE	FALSE	FALSE	FALSE
ENSDARG00000046014	FALSE	FALSE	FALSE	FALSE
ENSDARG00000029729	FALSE	FALSE	FALSE	FALSE
ENSDARG00000080682	FALSE	FALSE	FALSE	FALSE
ENSDARG00000041858	FALSE	FALSE	FALSE	FALSE
ENSDARG00000070351	FALSE	FALSE	FALSE	FALSE
ENSDARG00000074311	FALSE	FALSE	FALSE	FALSE
ENSDARG00000105594	FALSE	FALSE	FALSE	FALSE
ENSDARG00000056794	FALSE	FALSE	FALSE	TRUE
ENSDARG00000040822	FALSE	FALSE	FALSE	FALSE
ENSDARG00000097915	FALSE	FALSE	FALSE	FALSE
ENSDARG00000060845	FALSE	FALSE	FALSE	FALSE
ENSDARG00000014956	FALSE	FALSE	FALSE	FALSE
ENSDARG00000020239	FALSE	FALSE	FALSE	FALSE
ENSDARG00000094258	FALSE	FALSE	FALSE	FALSE
ENSDARG00000002347	FALSE	FALSE	FALSE	TRUE
ENSDARG00000115492	FALSE	FALSE	FALSE	FALSE
ENSDARG00000002021	FALSE	FALSE	FALSE	FALSE
ENSDARG00000019328	FALSE	FALSE	FALSE	FALSE
ENSDARG00000016496	FALSE	FALSE	FALSE	TRUE
ENSDARG00000018411	FALSE	FALSE	FALSE	FALSE
ENSDARG00000012513	FALSE	FALSE	FALSE	FALSE
ENSDARG00000079253	FALSE	FALSE	FALSE	FALSE
ENSDARG00000087916	FALSE	FALSE	FALSE	FALSE
ENSDARG00000009549	FALSE	FALSE	FALSE	FALSE
ENSDARG00000057465	FALSE	FALSE	FALSE	FALSE
ENSDARG00000056099	FALSE	FALSE	FALSE	FALSE
ENSDARG00000088140	FALSE	FALSE	FALSE	FALSE
ENSDARG00000079611	FALSE	FALSE	FALSE	FALSE
ENSDARG00000028099	FALSE	FALSE	FALSE	FALSE
ENSDARG00000040526	FALSE	FALSE	FALSE	TRUE
ENSDARG00000070553	FALSE	FALSE	FALSE	TRUE
ENSDARG00000099256	FALSE	FALSE	FALSE	FALSE
ENSDARG00000058818	FALSE	FALSE	FALSE	TRUE
ENSDARG00000041895	FALSE	FALSE	FALSE	TRUE
ENSDARG00000055294	FALSE	FALSE	FALSE	FALSE
ENSDARG00000089071	FALSE	FALSE	FALSE	FALSE
ENSDARG00000101471	FALSE	FALSE	FALSE	FALSE
ENSDARG00000007723	FALSE	FALSE	FALSE	FALSE
ENSDARG00000057513	FALSE	FALSE	FALSE	TRUE
ENSDARG00000058322	FALSE	FALSE	FALSE	FALSE
ENSDARG00000012057	FALSE	FALSE	FALSE	FALSE
ENSDARG00000029307	FALSE	FALSE	FALSE	FALSE
ENSDARG00000079478	FALSE	FALSE	FALSE	FALSE
ENSDARG00000106350	FALSE	FALSE	FALSE	FALSE
ENSDARG00000081224	FALSE	FALSE	FALSE	FALSE
ENSDARG00000115347	FALSE	FALSE	FALSE	FALSE
ENSDARG00000034504	FALSE	FALSE	FALSE	TRUE
ENSDARG00000061687	FALSE	FALSE	FALSE	FALSE
ENSDARG00000099909	FALSE	FALSE	FALSE	FALSE
ENSDARG00000054814	FALSE	FALSE	FALSE	TRUE
ENSDARG00000115944	FALSE	FALSE	FALSE	FALSE
ENSDARG00000104279	FALSE	FALSE	FALSE	FALSE
ENSDARG00000075564	FALSE	FALSE	FALSE	TRUE
ENSDARG00000029480	FALSE	FALSE	FALSE	FALSE
ENSDARG00000059235	FALSE	FALSE	FALSE	FALSE
ENSDARG00000062020	FALSE	FALSE	FALSE	FALSE
ENSDARG00000057167	FALSE	FALSE	FALSE	TRUE
ENSDARG00000076066	FALSE	FALSE	FALSE	FALSE
ENSDARG00000061684	FALSE	FALSE	FALSE	FALSE
ENSDARG00000075954	FALSE	FALSE	FALSE	FALSE
ENSDARG00000116736	FALSE	FALSE	FALSE	FALSE
ENSDARG00000023298	FALSE	FALSE	FALSE	TRUE
ENSDARG00000078803	FALSE	FALSE	FALSE	TRUE
ENSDARG00000030887	FALSE	FALSE	FALSE	FALSE
ENSDARG00000038297	FALSE	FALSE	FALSE	FALSE
ENSDARG00000060096	FALSE	FALSE	FALSE	FALSE
ENSDARG00000039466	FALSE	FALSE	FALSE	FALSE
ENSDARG00000062489	FALSE	FALSE	FALSE	FALSE
ENSDARG00000044328	FALSE	FALSE	FALSE	FALSE
ENSDARG00000074001	FALSE	FALSE	FALSE	FALSE
ENSDARG00000078574	FALSE	FALSE	FALSE	FALSE
ENSDARG00000102972	FALSE	FALSE	FALSE	FALSE
ENSDARG00000111514	FALSE	FALSE	FALSE	FALSE
ENSDARG00000053724	FALSE	FALSE	FALSE	FALSE
ENSDARG00000102833	FALSE	FALSE	FALSE	FALSE
ENSDARG00000089564	FALSE	FALSE	FALSE	FALSE
ENSDARG00000107213	FALSE	FALSE	FALSE	FALSE
ENSDARG00000017174	FALSE	FALSE	FALSE	FALSE
ENSDARG00000028800	FALSE	FALSE	FALSE	TRUE
ENSDARG00000090230	FALSE	FALSE	FALSE	FALSE
ENSDARG00000074057	FALSE	FALSE	FALSE	FALSE
ENSDARG00000040988	FALSE	FALSE	FALSE	FALSE
ENSDARG00000010160	FALSE	FALSE	FALSE	TRUE
ENSDARG00000080987	FALSE	FALSE	FALSE	FALSE
ENSDARG00000003311	FALSE	FALSE	FALSE	FALSE
ENSDARG00000031770	FALSE	FALSE	FALSE	FALSE
ENSDARG00000008127	FALSE	FALSE	FALSE	FALSE
ENSDARG00000006863	FALSE	FALSE	FALSE	FALSE
ENSDARG00000007244	FALSE	FALSE	FALSE	FALSE
ENSDARG00000077845	FALSE	FALSE	FALSE	FALSE
ENSDARG00000002230	FALSE	FALSE	FALSE	FALSE
ENSDARG00000026322	FALSE	FALSE	FALSE	FALSE
ENSDARG00000101636	FALSE	FALSE	FALSE	FALSE
ENSDARG00000070006	FALSE	FALSE	FALSE	TRUE
ENSDARG00000104242	FALSE	FALSE	FALSE	FALSE
ENSDARG00000096617	FALSE	FALSE	FALSE	FALSE
ENSDARG00000060751	FALSE	FALSE	FALSE	FALSE
ENSDARG00000077544	FALSE	FALSE	FALSE	FALSE
ENSDARG00000040487	FALSE	FALSE	FALSE	FALSE
ENSDARG00000110441	FALSE	FALSE	FALSE	FALSE
ENSDARG00000035835	FALSE	FALSE	FALSE	FALSE
ENSDARG00000027992	FALSE	FALSE	FALSE	FALSE
ENSDARG00000088440	FALSE	FALSE	FALSE	FALSE
ENSDARG00000112652	FALSE	FALSE	FALSE	FALSE
ENSDARG00000030289	FALSE	FALSE	FALSE	TRUE
ENSDARG00000096780	FALSE	FALSE	FALSE	FALSE
ENSDARG00000006782	FALSE	FALSE	FALSE	TRUE
ENSDARG00000042145	FALSE	FALSE	FALSE	FALSE
ENSDARG00000006791	FALSE	FALSE	FALSE	FALSE
ENSDARG00000058133	FALSE	FALSE	FALSE	FALSE
ENSDARG00000032801	FALSE	FALSE	FALSE	FALSE
ENSDARG00000094169	FALSE	FALSE	FALSE	FALSE
ENSDARG00000101735	FALSE	FALSE	FALSE	FALSE
ENSDARG00000074074	FALSE	FALSE	FALSE	FALSE
ENSDARG00000104372	FALSE	FALSE	FALSE	FALSE
ENSDARG00000036569	FALSE	FALSE	FALSE	FALSE
ENSDARG00000062956	FALSE	FALSE	FALSE	FALSE
ENSDARG00000113257	FALSE	FALSE	FALSE	FALSE
ENSDARG00000102844	FALSE	FALSE	FALSE	FALSE
ENSDARG00000096870	FALSE	FALSE	FALSE	FALSE
ENSDARG00000033616	FALSE	FALSE	FALSE	FALSE
ENSDARG00000024124	FALSE	FALSE	FALSE	FALSE
ENSDARG00000040926	FALSE	FALSE	FALSE	FALSE
ENSDARG00000100229	FALSE	FALSE	FALSE	FALSE
ENSDARG00000070535	FALSE	FALSE	FALSE	FALSE
ENSDARG00000018757	FALSE	FALSE	FALSE	FALSE
ENSDARG00000057830	FALSE	FALSE	FALSE	TRUE
ENSDARG00000107439	FALSE	FALSE	FALSE	FALSE
ENSDARG00000103819	FALSE	FALSE	FALSE	FALSE
ENSDARG00000116483	FALSE	FALSE	FALSE	FALSE
ENSDARG00000101482	FALSE	FALSE	FALSE	FALSE
ENSDARG00000035564	FALSE	FALSE	FALSE	TRUE
ENSDARG00000080404	FALSE	FALSE	FALSE	FALSE
ENSDARG00000008165	FALSE	FALSE	FALSE	FALSE
ENSDARG00000044381	FALSE	FALSE	FALSE	FALSE
ENSDARG00000076592	FALSE	FALSE	FALSE	FALSE
ENSDARG00000010132	FALSE	FALSE	FALSE	FALSE
ENSDARG00000010267	FALSE	FALSE	FALSE	FALSE
ENSDARG00000020623	FALSE	FALSE	FALSE	FALSE
ENSDARG00000035136	FALSE	FALSE	FALSE	FALSE
ENSDARG00000097451	FALSE	FALSE	FALSE	FALSE
ENSDARG00000076239	FALSE	FALSE	FALSE	FALSE
ENSDARG00000114895	FALSE	FALSE	FALSE	FALSE
ENSDARG00000062561	FALSE	FALSE	FALSE	FALSE
ENSDARG00000099733	FALSE	FALSE	FALSE	FALSE
ENSDARG00000015879	FALSE	FALSE	FALSE	FALSE
ENSDARG00000076464	FALSE	FALSE	FALSE	FALSE
ENSDARG00000070651	FALSE	FALSE	FALSE	FALSE
ENSDARG00000069744	FALSE	FALSE	FALSE	FALSE
ENSDARG00000077384	FALSE	FALSE	FALSE	FALSE
ENSDARG00000105629	FALSE	FALSE	FALSE	FALSE
ENSDARG00000025899	FALSE	FALSE	FALSE	TRUE
ENSDARG00000015990	FALSE	FALSE	FALSE	TRUE
ENSDARG00000100947	FALSE	FALSE	FALSE	FALSE
ENSDARG00000062765	FALSE	FALSE	FALSE	FALSE
ENSDARG00000096925	FALSE	FALSE	FALSE	FALSE
ENSDARG00000101655	FALSE	FALSE	FALSE	FALSE
ENSDARG00000106344	FALSE	FALSE	FALSE	FALSE
ENSDARG00000079790	FALSE	FALSE	FALSE	TRUE
ENSDARG00000011490	FALSE	FALSE	FALSE	FALSE
ENSDARG00000093416	FALSE	FALSE	FALSE	FALSE
ENSDARG00000055270	FALSE	FALSE	FALSE	FALSE
ENSDARG00000061864	FALSE	FALSE	FALSE	FALSE
ENSDARG00000115557	FALSE	FALSE	FALSE	FALSE
ENSDARG00000113800	FALSE	FALSE	FALSE	FALSE
ENSDARG00000056245	FALSE	FALSE	FALSE	FALSE
ENSDARG00000019339	FALSE	FALSE	FALSE	FALSE
ENSDARG00000057577	FALSE	FALSE	FALSE	FALSE
ENSDARG00000043135	FALSE	FALSE	FALSE	FALSE
ENSDARG00000105788	FALSE	FALSE	FALSE	FALSE
ENSDARG00000070297	TRUE	FALSE	FALSE	FALSE
ENSDARG00000074863	FALSE	FALSE	FALSE	FALSE
ENSDARG00000020000	FALSE	FALSE	FALSE	TRUE
ENSDARG00000060813	FALSE	FALSE	FALSE	FALSE
ENSDARG00000078006	FALSE	FALSE	FALSE	FALSE
ENSDARG00000104812	FALSE	FALSE	FALSE	FALSE
ENSDARG00000070734	FALSE	FALSE	FALSE	FALSE
ENSDARG00000105189	FALSE	FALSE	FALSE	FALSE
ENSDARG00000075501	FALSE	FALSE	FALSE	FALSE
ENSDARG00000006272	FALSE	FALSE	FALSE	FALSE
ENSDARG00000042826	FALSE	FALSE	FALSE	FALSE
ENSDARG00000105393	FALSE	FALSE	FALSE	FALSE
ENSDARG00000026766	FALSE	FALSE	FALSE	TRUE
ENSDARG00000069373	FALSE	FALSE	FALSE	FALSE
ENSDARG00000013210	FALSE	FALSE	FALSE	FALSE
ENSDARG00000093485	FALSE	FALSE	FALSE	FALSE
ENSDARG00000099252	FALSE	FALSE	FALSE	FALSE
ENSDARG00000081702	FALSE	FALSE	FALSE	FALSE
ENSDARG00000061590	FALSE	FALSE	FALSE	TRUE
ENSDARG00000037593	FALSE	FALSE	FALSE	FALSE
ENSDARG00000099953	FALSE	FALSE	FALSE	FALSE
ENSDARG00000026499	FALSE	FALSE	FALSE	FALSE
ENSDARG00000006526	FALSE	FALSE	FALSE	FALSE
ENSDARG00000097119	FALSE	FALSE	FALSE	FALSE
ENSDARG00000074117	FALSE	FALSE	FALSE	FALSE
ENSDARG00000086699	FALSE	FALSE	FALSE	FALSE
ENSDARG00000101475	FALSE	FALSE	FALSE	FALSE
ENSDARG00000101242	FALSE	FALSE	FALSE	FALSE
ENSDARG00000070098	FALSE	FALSE	FALSE	FALSE
ENSDARG00000058961	FALSE	FALSE	FALSE	FALSE
ENSDARG00000079233	FALSE	FALSE	FALSE	FALSE
ENSDARG00000079401	FALSE	FALSE	FALSE	FALSE
ENSDARG00000014309	FALSE	FALSE	FALSE	FALSE
ENSDARG00000070480	FALSE	FALSE	FALSE	FALSE
ENSDARG00000069467	FALSE	FALSE	FALSE	FALSE
ENSDARG00000021209	FALSE	FALSE	FALSE	FALSE
ENSDARG00000017235	FALSE	FALSE	FALSE	TRUE
ENSDARG00000055305	FALSE	FALSE	FALSE	FALSE
ENSDARG00000058413	FALSE	FALSE	FALSE	FALSE
ENSDARG00000102229	FALSE	FALSE	FALSE	FALSE
ENSDARG00000075172	FALSE	FALSE	FALSE	FALSE
ENSDARG00000009281	FALSE	FALSE	FALSE	FALSE
ENSDARG00000007812	FALSE	FALSE	FALSE	FALSE
ENSDARG00000079618	FALSE	FALSE	FALSE	FALSE
ENSDARG00000101184	FALSE	FALSE	FALSE	FALSE
ENSDARG00000012823	FALSE	FALSE	FALSE	FALSE
ENSDARG00000058178	FALSE	FALSE	FALSE	FALSE
ENSDARG00000018272	FALSE	FALSE	FALSE	FALSE
ENSDARG00000091348	FALSE	FALSE	FALSE	FALSE
ENSDARG00000033738	FALSE	FALSE	FALSE	FALSE
ENSDARG00000105430	FALSE	FALSE	FALSE	FALSE
ENSDARG00000031817	FALSE	FALSE	FALSE	FALSE
ENSDARG00000019702	FALSE	FALSE	FALSE	FALSE
ENSDARG00000028614	FALSE	FALSE	FALSE	FALSE
ENSDARG00000097771	FALSE	FALSE	FALSE	FALSE
ENSDARG00000099753	FALSE	FALSE	FALSE	FALSE
ENSDARG00000059826	FALSE	FALSE	FALSE	FALSE
ENSDARG00000097992	FALSE	FALSE	FALSE	FALSE
ENSDARG00000088658	FALSE	FALSE	FALSE	FALSE
ENSDARG00000059705	FALSE	FALSE	FALSE	FALSE
ENSDARG00000079854	FALSE	FALSE	FALSE	FALSE
ENSDARG00000021220	FALSE	FALSE	FALSE	FALSE
ENSDARG00000056490	FALSE	FALSE	FALSE	FALSE
ENSDARG00000115784	FALSE	FALSE	FALSE	FALSE
ENSDARG00000103840	FALSE	FALSE	FALSE	FALSE
ENSDARG00000094678	FALSE	FALSE	FALSE	FALSE
ENSDARG00000071046	FALSE	FALSE	FALSE	FALSE
ENSDARG00000094850	FALSE	FALSE	FALSE	FALSE
ENSDARG00000042033	FALSE	FALSE	FALSE	FALSE
ENSDARG00000057714	FALSE	FALSE	FALSE	FALSE
ENSDARG00000015427	FALSE	FALSE	FALSE	TRUE
ENSDARG00000039513	FALSE	FALSE	FALSE	FALSE
ENSDARG00000059902	FALSE	FALSE	FALSE	FALSE
ENSDARG00000062702	FALSE	FALSE	FALSE	FALSE
ENSDARG00000089019	FALSE	FALSE	FALSE	FALSE
ENSDARG00000095805	FALSE	FALSE	FALSE	TRUE
ENSDARG00000059461	FALSE	FALSE	FALSE	FALSE
ENSDARG00000094871	FALSE	FALSE	FALSE	FALSE
ENSDARG00000087084	FALSE	FALSE	FALSE	FALSE
ENSDARG00000060925	FALSE	FALSE	FALSE	TRUE
ENSDARG00000100925	FALSE	FALSE	FALSE	FALSE
ENSDARG00000007467	FALSE	FALSE	FALSE	FALSE
ENSDARG00000099989	FALSE	FALSE	FALSE	FALSE
ENSDARG00000032114	FALSE	FALSE	FALSE	FALSE
ENSDARG00000115851	FALSE	FALSE	FALSE	FALSE
ENSDARG00000112012	FALSE	FALSE	FALSE	FALSE
ENSDARG00000082513	FALSE	FALSE	FALSE	FALSE
ENSDARG00000058302	FALSE	FALSE	FALSE	FALSE
ENSDARG00000007912	FALSE	FALSE	FALSE	FALSE
ENSDARG00000076308	FALSE	FALSE	FALSE	FALSE
ENSDARG00000044550	FALSE	FALSE	FALSE	FALSE
ENSDARG00000029768	FALSE	FALSE	FALSE	FALSE
ENSDARG00000053097	FALSE	FALSE	FALSE	TRUE
ENSDARG00000083420	FALSE	FALSE	FALSE	FALSE
ENSDARG00000000151	FALSE	FALSE	FALSE	FALSE
ENSDARG00000020080	FALSE	FALSE	FALSE	FALSE
ENSDARG00000056750	FALSE	FALSE	FALSE	FALSE
ENSDARG00000117444	FALSE	FALSE	FALSE	FALSE
ENSDARG00000062471	FALSE	FALSE	FALSE	FALSE
ENSDARG00000036844	FALSE	FALSE	FALSE	FALSE
ENSDARG00000070162	FALSE	FALSE	FALSE	FALSE
ENSDARG00000055518	FALSE	FALSE	FALSE	FALSE
ENSDARG00000103443	FALSE	FALSE	FALSE	FALSE
ENSDARG00000085644	FALSE	FALSE	FALSE	FALSE
ENSDARG00000085437	FALSE	FALSE	FALSE	FALSE
ENSDARG00000033889	FALSE	FALSE	FALSE	FALSE
ENSDARG00000001879	FALSE	FALSE	FALSE	TRUE
ENSDARG00000007359	FALSE	FALSE	FALSE	FALSE
ENSDARG00000098730	FALSE	FALSE	FALSE	FALSE
ENSDARG00000012460	FALSE	FALSE	FALSE	FALSE
ENSDARG00000055563	FALSE	FALSE	FALSE	FALSE
ENSDARG00000056888	FALSE	FALSE	FALSE	FALSE
ENSDARG00000089959	FALSE	FALSE	FALSE	FALSE
ENSDARG00000044299	FALSE	FALSE	FALSE	TRUE
ENSDARG00000114557	FALSE	FALSE	FALSE	FALSE
ENSDARG00000007485	FALSE	FALSE	FALSE	FALSE
ENSDARG00000040727	FALSE	FALSE	FALSE	FALSE
ENSDARG00000116079	FALSE	FALSE	FALSE	FALSE
ENSDARG00000018006	FALSE	FALSE	FALSE	FALSE
ENSDARG00000062972	FALSE	FALSE	FALSE	FALSE
ENSDARG00000079688	FALSE	FALSE	FALSE	FALSE
ENSDARG00000078256	FALSE	FALSE	FALSE	FALSE
ENSDARG00000117743	FALSE	FALSE	FALSE	FALSE
ENSDARG00000088029	FALSE	FALSE	FALSE	FALSE
ENSDARG00000079276	FALSE	FALSE	FALSE	FALSE
ENSDARG00000014962	FALSE	FALSE	FALSE	FALSE
ENSDARG00000099999	FALSE	FALSE	FALSE	FALSE
ENSDARG00000079613	FALSE	FALSE	FALSE	FALSE
ENSDARG00000097764	FALSE	FALSE	FALSE	FALSE
ENSDARG00000017571	FALSE	FALSE	FALSE	TRUE
ENSDARG00000087145	FALSE	FALSE	FALSE	FALSE
ENSDARG00000059719	FALSE	FALSE	FALSE	FALSE
ENSDARG00000076362	FALSE	FALSE	FALSE	FALSE
ENSDARG00000057317	FALSE	FALSE	FALSE	FALSE
ENSDARG00000012899	FALSE	FALSE	FALSE	TRUE
ENSDARG00000068213	FALSE	FALSE	FALSE	TRUE
ENSDARG00000101437	FALSE	FALSE	FALSE	FALSE
ENSDARG00000006202	FALSE	FALSE	FALSE	FALSE
ENSDARG00000077473	TRUE	TRUE	TRUE	TRUE
ENSDARG00000053483	FALSE	FALSE	FALSE	FALSE
ENSDARG00000112528	FALSE	FALSE	FALSE	FALSE
ENSDARG00000025953	FALSE	FALSE	FALSE	FALSE
ENSDARG00000098603	FALSE	FALSE	FALSE	FALSE
ENSDARG00000035519	TRUE	TRUE	FALSE	FALSE
ENSDARG00000074050	FALSE	FALSE	FALSE	TRUE
ENSDARG00000019008	FALSE	FALSE	FALSE	FALSE
ENSDARG00000100252	FALSE	FALSE	FALSE	FALSE
ENSDARG00000053474	FALSE	FALSE	FALSE	FALSE
ENSDARG00000056491	FALSE	FALSE	FALSE	FALSE
ENSDARG00000033614	FALSE	FALSE	FALSE	FALSE
ENSDARG00000097324	FALSE	FALSE	FALSE	FALSE
ENSDARG00000062472	FALSE	FALSE	FALSE	FALSE
ENSDARG00000028848	FALSE	FALSE	FALSE	FALSE
ENSDARG00000074465	FALSE	FALSE	FALSE	FALSE
ENSDARG00000045331	FALSE	FALSE	FALSE	FALSE
ENSDARG00000063242	FALSE	FALSE	FALSE	FALSE
ENSDARG00000069917	FALSE	FALSE	FALSE	FALSE
ENSDARG00000095939	FALSE	FALSE	FALSE	FALSE
ENSDARG00000101652	FALSE	FALSE	FALSE	FALSE
ENSDARG00000032221	FALSE	FALSE	FALSE	FALSE
ENSDARG00000016605	FALSE	FALSE	FALSE	FALSE
ENSDARG00000013023	FALSE	FALSE	FALSE	FALSE
ENSDARG00000004243	FALSE	FALSE	FALSE	FALSE
ENSDARG00000095557	FALSE	FALSE	FALSE	FALSE
ENSDARG00000077428	FALSE	FALSE	FALSE	FALSE
ENSDARG00000068681	FALSE	FALSE	FALSE	FALSE
ENSDARG00000097481	FALSE	FALSE	FALSE	FALSE
ENSDARG00000005786	FALSE	FALSE	FALSE	FALSE
ENSDARG00000095504	FALSE	FALSE	FALSE	FALSE
ENSDARG00000038868	FALSE	FALSE	FALSE	FALSE
ENSDARG00000036316	FALSE	FALSE	FALSE	TRUE
ENSDARG00000013795	FALSE	FALSE	FALSE	FALSE
ENSDARG00000023963	FALSE	FALSE	FALSE	FALSE
ENSDARG00000067741	FALSE	FALSE	FALSE	FALSE
ENSDARG00000070955	FALSE	FALSE	FALSE	FALSE
ENSDARG00000044326	FALSE	FALSE	FALSE	FALSE
ENSDARG00000097151	FALSE	FALSE	FALSE	FALSE
ENSDARG00000028327	FALSE	FALSE	FALSE	FALSE
ENSDARG00000105281	FALSE	FALSE	FALSE	FALSE
ENSDARG00000077155	FALSE	FALSE	FALSE	FALSE
ENSDARG00000069496	FALSE	FALSE	FALSE	FALSE
ENSDARG00000060594	FALSE	FALSE	FALSE	FALSE
ENSDARG00000045483	FALSE	FALSE	FALSE	FALSE
ENSDARG00000109440	FALSE	FALSE	FALSE	FALSE
ENSDARG00000069865	FALSE	FALSE	FALSE	FALSE
ENSDARG00000103037	FALSE	FALSE	FALSE	FALSE
ENSDARG00000024785	FALSE	FALSE	FALSE	FALSE
ENSDARG00000095933	FALSE	FALSE	FALSE	FALSE
ENSDARG00000100470	FALSE	FALSE	FALSE	FALSE
ENSDARG00000117476	FALSE	FALSE	FALSE	FALSE
ENSDARG00000053878	FALSE	FALSE	FALSE	FALSE
ENSDARG00000078924	FALSE	FALSE	FALSE	FALSE
ENSDARG00000103418	FALSE	FALSE	FALSE	FALSE
ENSDARG00000037677	FALSE	FALSE	FALSE	FALSE
ENSDARG00000038378	FALSE	FALSE	TRUE	TRUE
ENSDARG00000083100	FALSE	FALSE	FALSE	FALSE
ENSDARG00000097490	FALSE	FALSE	FALSE	FALSE
ENSDARG00000096558	FALSE	FALSE	FALSE	FALSE
ENSDARG00000019572	FALSE	FALSE	FALSE	TRUE
ENSDARG00000060734	FALSE	FALSE	FALSE	FALSE
ENSDARG00000038424	FALSE	FALSE	FALSE	FALSE
ENSDARG00000003526	FALSE	FALSE	FALSE	FALSE
ENSDARG00000099918	FALSE	FALSE	FALSE	FALSE
ENSDARG00000075500	FALSE	FALSE	FALSE	FALSE
ENSDARG00000107820	FALSE	FALSE	FALSE	FALSE
ENSDARG00000105184	FALSE	FALSE	FALSE	FALSE
ENSDARG00000104118	FALSE	FALSE	FALSE	FALSE
ENSDARG00000060875	FALSE	FALSE	FALSE	FALSE
ENSDARG00000096834	FALSE	FALSE	FALSE	FALSE
ENSDARG00000077822	FALSE	FALSE	FALSE	FALSE
ENSDARG00000070390	FALSE	FALSE	FALSE	FALSE
ENSDARG00000008322	FALSE	FALSE	FALSE	FALSE
ENSDARG00000097794	FALSE	FALSE	FALSE	FALSE
ENSDARG00000103226	FALSE	FALSE	FALSE	FALSE
ENSDARG00000032623	FALSE	FALSE	FALSE	FALSE
ENSDARG00000003421	FALSE	FALSE	FALSE	FALSE
ENSDARG00000014230	FALSE	FALSE	FALSE	FALSE
ENSDARG00000076416	FALSE	FALSE	FALSE	FALSE
ENSDARG00000025949	FALSE	FALSE	FALSE	FALSE
ENSDARG00000078529	FALSE	FALSE	FALSE	FALSE
ENSDARG00000093420	FALSE	FALSE	FALSE	FALSE
ENSDARG00000102724	FALSE	FALSE	FALSE	FALSE
ENSDARG00000034086	FALSE	FALSE	FALSE	FALSE
ENSDARG00000078802	FALSE	FALSE	FALSE	FALSE
ENSDARG00000042652	FALSE	FALSE	FALSE	FALSE
ENSDARG00000036063	FALSE	FALSE	FALSE	TRUE
ENSDARG00000038156	FALSE	FALSE	FALSE	FALSE
ENSDARG00000060978	FALSE	FALSE	FALSE	FALSE
ENSDARG00000024920	FALSE	FALSE	FALSE	TRUE
ENSDARG00000043624	FALSE	FALSE	FALSE	FALSE
ENSDARG00000041802	FALSE	FALSE	FALSE	FALSE
ENSDARG00000101819	FALSE	FALSE	FALSE	FALSE
ENSDARG00000099123	FALSE	FALSE	FALSE	FALSE
ENSDARG00000079915	FALSE	FALSE	FALSE	FALSE
ENSDARG00000068262	FALSE	FALSE	FALSE	FALSE
ENSDARG00000074307	FALSE	FALSE	FALSE	FALSE
ENSDARG00000007279	FALSE	FALSE	FALSE	FALSE
ENSDARG00000024694	FALSE	FALSE	FALSE	FALSE
ENSDARG00000074688	FALSE	FALSE	FALSE	FALSE
ENSDARG00000052396	FALSE	FALSE	FALSE	FALSE
ENSDARG00000061732	FALSE	FALSE	FALSE	TRUE
ENSDARG00000020521	FALSE	FALSE	FALSE	FALSE
ENSDARG00000013623	FALSE	FALSE	FALSE	FALSE
ENSDARG00000097000	FALSE	FALSE	FALSE	FALSE
ENSDARG00000100916	FALSE	FALSE	FALSE	FALSE
ENSDARG00000005162	FALSE	FALSE	FALSE	FALSE
ENSDARG00000078904	FALSE	FALSE	FALSE	FALSE
ENSDARG00000056986	FALSE	FALSE	FALSE	FALSE
ENSDARG00000091660	FALSE	FALSE	FALSE	FALSE
ENSDARG00000033376	FALSE	FALSE	FALSE	FALSE
ENSDARG00000020573	FALSE	FALSE	FALSE	FALSE
ENSDARG00000112235	FALSE	FALSE	FALSE	FALSE
ENSDARG00000089372	FALSE	FALSE	FALSE	FALSE
ENSDARG00000075346	FALSE	FALSE	FALSE	FALSE
ENSDARG00000061030	FALSE	FALSE	FALSE	FALSE
ENSDARG00000051956	FALSE	FALSE	FALSE	FALSE
ENSDARG00000102786	FALSE	FALSE	FALSE	FALSE
ENSDARG00000089887	FALSE	FALSE	FALSE	FALSE
ENSDARG00000095745	TRUE	TRUE	TRUE	TRUE
ENSDARG00000089790	FALSE	FALSE	FALSE	TRUE
ENSDARG00000070794	FALSE	FALSE	FALSE	TRUE
ENSDARG00000092118	FALSE	FALSE	FALSE	FALSE
ENSDARG00000056838	FALSE	FALSE	FALSE	FALSE
ENSDARG00000100173	FALSE	FALSE	FALSE	FALSE
ENSDARG00000095638	FALSE	FALSE	FALSE	FALSE
ENSDARG00000003527	FALSE	FALSE	FALSE	TRUE
ENSDARG00000113756	FALSE	FALSE	FALSE	FALSE
ENSDARG00000078434	FALSE	FALSE	FALSE	FALSE
ENSDARG00000086445	FALSE	FALSE	FALSE	FALSE
ENSDARG00000075952	FALSE	FALSE	FALSE	FALSE
ENSDARG00000009657	FALSE	FALSE	FALSE	FALSE
ENSDARG00000105583	FALSE	FALSE	FALSE	FALSE
ENSDARG00000102874	FALSE	FALSE	FALSE	FALSE
ENSDARG00000043431	FALSE	FALSE	FALSE	FALSE
ENSDARG00000107408	FALSE	FALSE	FALSE	FALSE
ENSDARG00000044874	FALSE	FALSE	FALSE	FALSE
ENSDARG00000075904	FALSE	FALSE	FALSE	FALSE
ENSDARG00000087844	TRUE	TRUE	FALSE	TRUE
ENSDARG00000074702	FALSE	FALSE	FALSE	FALSE
ENSDARG00000043480	FALSE	FALSE	FALSE	FALSE
ENSDARG00000021945	FALSE	FALSE	FALSE	TRUE
ENSDARG00000082646	FALSE	FALSE	FALSE	FALSE
ENSDARG00000096838	FALSE	FALSE	FALSE	FALSE
ENSDARG00000089919	FALSE	FALSE	FALSE	FALSE
ENSDARG00000010425	FALSE	FALSE	FALSE	FALSE
ENSDARG00000042072	FALSE	FALSE	FALSE	FALSE
ENSDARG00000011247	FALSE	FALSE	FALSE	TRUE
ENSDARG00000034610	FALSE	FALSE	FALSE	FALSE
ENSDARG00000025397	FALSE	FALSE	FALSE	TRUE
ENSDARG00000105504	FALSE	FALSE	FALSE	FALSE
ENSDARG00000079947	FALSE	FALSE	FALSE	FALSE
ENSDARG00000098683	FALSE	FALSE	FALSE	FALSE
ENSDARG00000018968	FALSE	FALSE	FALSE	TRUE
ENSDARG00000057334	FALSE	FALSE	FALSE	FALSE
ENSDARG00000074060	FALSE	FALSE	FALSE	FALSE
ENSDARG00000067656	FALSE	FALSE	FALSE	FALSE
ENSDARG00000018192	FALSE	FALSE	FALSE	TRUE
ENSDARG00000026855	FALSE	FALSE	FALSE	FALSE
ENSDARG00000056966	FALSE	FALSE	FALSE	FALSE
ENSDARG00000059722	FALSE	FALSE	FALSE	FALSE
ENSDARG00000016311	FALSE	FALSE	FALSE	FALSE
ENSDARG00000026655	FALSE	FALSE	FALSE	FALSE
ENSDARG00000005754	FALSE	FALSE	FALSE	FALSE
ENSDARG00000043011	FALSE	FALSE	FALSE	FALSE
ENSDARG00000091656	FALSE	FALSE	FALSE	FALSE
ENSDARG00000078492	FALSE	FALSE	FALSE	FALSE
ENSDARG00000014522	FALSE	FALSE	FALSE	TRUE
ENSDARG00000075850	FALSE	FALSE	FALSE	FALSE
ENSDARG00000032532	FALSE	FALSE	FALSE	TRUE
ENSDARG00000105409	FALSE	FALSE	FALSE	FALSE
ENSDARG00000102802	FALSE	FALSE	FALSE	FALSE
ENSDARG00000017741	FALSE	FALSE	FALSE	TRUE
ENSDARG00000098968	FALSE	FALSE	FALSE	FALSE
ENSDARG00000008119	FALSE	FALSE	FALSE	FALSE
ENSDARG00000041141	FALSE	FALSE	FALSE	FALSE
ENSDARG00000115123	FALSE	FALSE	FALSE	FALSE
ENSDARG00000101378	FALSE	FALSE	FALSE	FALSE
ENSDARG00000082187	FALSE	FALSE	FALSE	FALSE
ENSDARG00000038296	FALSE	FALSE	FALSE	FALSE
ENSDARG00000003287	FALSE	FALSE	FALSE	TRUE
ENSDARG00000098687	FALSE	FALSE	FALSE	FALSE
ENSDARG00000018025	FALSE	FALSE	FALSE	FALSE
ENSDARG00000010553	FALSE	FALSE	FALSE	FALSE
ENSDARG00000075008	FALSE	FALSE	FALSE	FALSE
ENSDARG00000102711	FALSE	FALSE	FALSE	FALSE
ENSDARG00000085061	FALSE	FALSE	FALSE	FALSE
ENSDARG00000099741	FALSE	FALSE	FALSE	FALSE
ENSDARG00000069893	FALSE	FALSE	FALSE	FALSE
ENSDARG00000006253	TRUE	FALSE	FALSE	FALSE
ENSDARG00000002362	FALSE	FALSE	FALSE	FALSE
ENSDARG00000103027	FALSE	FALSE	FALSE	FALSE
ENSDARG00000111460	FALSE	FALSE	FALSE	FALSE
ENSDARG00000063509	FALSE	FALSE	FALSE	FALSE
ENSDARG00000109630	FALSE	FALSE	FALSE	FALSE
ENSDARG00000079623	FALSE	FALSE	FALSE	FALSE
ENSDARG00000003091	FALSE	FALSE	FALSE	FALSE
ENSDARG00000042054	FALSE	FALSE	FALSE	FALSE
ENSDARG00000061844	FALSE	FALSE	FALSE	FALSE
ENSDARG00000097662	FALSE	FALSE	FALSE	FALSE
ENSDARG00000011055	FALSE	FALSE	FALSE	FALSE
ENSDARG00000103100	FALSE	FALSE	FALSE	FALSE
ENSDARG00000074287	FALSE	FALSE	FALSE	FALSE
ENSDARG00000104919	FALSE	FALSE	FALSE	FALSE
ENSDARG00000117475	FALSE	FALSE	FALSE	FALSE
ENSDARG00000092073	FALSE	FALSE	FALSE	TRUE
ENSDARG00000007141	FALSE	FALSE	FALSE	FALSE
ENSDARG00000016871	FALSE	FALSE	FALSE	FALSE
ENSDARG00000104596	FALSE	FALSE	FALSE	FALSE
ENSDARG00000056691	FALSE	FALSE	FALSE	FALSE
ENSDARG00000102462	FALSE	FALSE	FALSE	FALSE
ENSDARG00000113398	FALSE	FALSE	FALSE	FALSE
ENSDARG00000044752	FALSE	FALSE	FALSE	FALSE
ENSDARG00000057074	FALSE	FALSE	FALSE	FALSE
ENSDARG00000058352	FALSE	FALSE	FALSE	FALSE
ENSDARG00000054033	FALSE	FALSE	FALSE	FALSE
ENSDARG00000055255	FALSE	FALSE	FALSE	FALSE
ENSDARG00000057286	FALSE	FALSE	FALSE	FALSE
ENSDARG00000102459	FALSE	FALSE	FALSE	FALSE
ENSDARG00000099966	FALSE	FALSE	FALSE	FALSE
ENSDARG00000102328	FALSE	FALSE	FALSE	FALSE
ENSDARG00000073876	FALSE	FALSE	FALSE	FALSE
ENSDARG00000033978	FALSE	FALSE	FALSE	FALSE
ENSDARG00000007976	FALSE	FALSE	FALSE	FALSE
ENSDARG00000020759	FALSE	FALSE	FALSE	FALSE
ENSDARG00000106966	FALSE	FALSE	FALSE	FALSE
ENSDARG00000105341	FALSE	FALSE	FALSE	FALSE
ENSDARG00000060917	FALSE	FALSE	FALSE	FALSE
ENSDARG00000031098	FALSE	FALSE	FALSE	FALSE
ENSDARG00000061274	FALSE	FALSE	FALSE	FALSE
ENSDARG00000101083	FALSE	FALSE	FALSE	FALSE
ENSDARG00000073950	FALSE	FALSE	FALSE	FALSE
ENSDARG00000044375	FALSE	FALSE	FALSE	FALSE
ENSDARG00000100368	FALSE	FALSE	FALSE	FALSE
ENSDARG00000009886	FALSE	FALSE	FALSE	FALSE
ENSDARG00000091131	FALSE	FALSE	FALSE	FALSE
ENSDARG00000039684	FALSE	FALSE	FALSE	FALSE
ENSDARG00000037924	FALSE	FALSE	FALSE	FALSE
ENSDARG00000062350	FALSE	FALSE	FALSE	FALSE
ENSDARG00000058538	FALSE	FALSE	FALSE	TRUE
ENSDARG00000070423	FALSE	FALSE	FALSE	FALSE
ENSDARG00000100212	FALSE	FALSE	FALSE	FALSE
ENSDARG00000014015	FALSE	FALSE	FALSE	FALSE
ENSDARG00000057586	FALSE	FALSE	FALSE	FALSE
ENSDARG00000017211	FALSE	FALSE	FALSE	FALSE
ENSDARG00000014854	FALSE	FALSE	FALSE	FALSE
ENSDARG00000073952	FALSE	FALSE	FALSE	FALSE
ENSDARG00000117016	FALSE	FALSE	FALSE	FALSE
ENSDARG00000034559	FALSE	FALSE	FALSE	FALSE
ENSDARG00000036700	FALSE	FALSE	FALSE	TRUE
ENSDARG00000005972	FALSE	FALSE	FALSE	FALSE
ENSDARG00000092630	FALSE	FALSE	FALSE	FALSE
ENSDARG00000016474	FALSE	FALSE	FALSE	FALSE
ENSDARG00000068557	FALSE	FALSE	FALSE	FALSE
ENSDARG00000045014	FALSE	FALSE	FALSE	FALSE
ENSDARG00000002968	FALSE	FALSE	FALSE	TRUE
ENSDARG00000117470	FALSE	FALSE	FALSE	FALSE
ENSDARG00000059534	FALSE	FALSE	FALSE	FALSE
ENSDARG00000074447	FALSE	FALSE	FALSE	TRUE
ENSDARG00000097367	FALSE	FALSE	FALSE	FALSE
ENSDARG00000055813	FALSE	FALSE	FALSE	FALSE
ENSDARG00000037954	FALSE	FALSE	FALSE	FALSE
ENSDARG00000100398	FALSE	FALSE	FALSE	FALSE
ENSDARG00000002336	FALSE	FALSE	TRUE	TRUE
ENSDARG00000001313	FALSE	FALSE	FALSE	FALSE
ENSDARG00000103319	FALSE	FALSE	FALSE	FALSE
ENSDARG00000042881	FALSE	FALSE	FALSE	FALSE
ENSDARG00000077762	FALSE	FALSE	FALSE	FALSE
ENSDARG00000063538	FALSE	FALSE	FALSE	FALSE
ENSDARG00000023002	FALSE	FALSE	FALSE	TRUE
ENSDARG00000076919	FALSE	FALSE	FALSE	FALSE
ENSDARG00000105934	FALSE	FALSE	FALSE	FALSE
ENSDARG00000095750	FALSE	FALSE	FALSE	FALSE
ENSDARG00000045804	FALSE	FALSE	FALSE	FALSE
ENSDARG00000043133	FALSE	FALSE	FALSE	TRUE
ENSDARG00000004796	FALSE	FALSE	FALSE	FALSE
ENSDARG00000011693	FALSE	FALSE	FALSE	FALSE
ENSDARG00000060006	FALSE	FALSE	FALSE	FALSE
ENSDARG00000057698	FALSE	FALSE	FALSE	TRUE
ENSDARG00000105659	FALSE	FALSE	FALSE	FALSE
ENSDARG00000099086	FALSE	FALSE	FALSE	FALSE
ENSDARG00000059303	FALSE	FALSE	FALSE	TRUE
ENSDARG00000018853	FALSE	FALSE	FALSE	FALSE
ENSDARG00000097082	FALSE	FALSE	FALSE	FALSE
ENSDARG00000044803	FALSE	FALSE	FALSE	TRUE
ENSDARG00000108349	FALSE	FALSE	FALSE	FALSE
ENSDARG00000002285	FALSE	FALSE	FALSE	FALSE
ENSDARG00000037654	FALSE	FALSE	FALSE	FALSE
ENSDARG00000092407	FALSE	FALSE	FALSE	FALSE
ENSDARG00000099793	FALSE	FALSE	FALSE	FALSE
ENSDARG00000029177	FALSE	FALSE	FALSE	FALSE
ENSDARG00000013777	FALSE	FALSE	FALSE	FALSE
ENSDARG00000101727	FALSE	FALSE	FALSE	FALSE
ENSDARG00000097964	FALSE	FALSE	FALSE	FALSE
ENSDARG00000103625	FALSE	FALSE	FALSE	FALSE
ENSDARG00000036637	FALSE	FALSE	FALSE	FALSE
ENSDARG00000053091	FALSE	FALSE	FALSE	FALSE
ENSDARG00000079766	FALSE	FALSE	FALSE	FALSE
ENSDARG00000080572	FALSE	FALSE	FALSE	FALSE
ENSDARG00000040300	FALSE	FALSE	FALSE	FALSE
ENSDARG00000054778	FALSE	FALSE	FALSE	FALSE
ENSDARG00000044056	FALSE	FALSE	FALSE	FALSE
ENSDARG00000077002	FALSE	FALSE	FALSE	FALSE
ENSDARG00000037906	FALSE	FALSE	FALSE	FALSE
ENSDARG00000034825	FALSE	FALSE	FALSE	TRUE
ENSDARG00000057234	FALSE	FALSE	FALSE	FALSE
ENSDARG00000014577	FALSE	FALSE	FALSE	FALSE
ENSDARG00000022007	FALSE	FALSE	FALSE	FALSE
ENSDARG00000093189	FALSE	FALSE	FALSE	FALSE
ENSDARG00000116130	FALSE	FALSE	FALSE	FALSE
ENSDARG00000061180	FALSE	FALSE	FALSE	FALSE
ENSDARG00000002220	FALSE	FALSE	FALSE	TRUE
ENSDARG00000055719	FALSE	FALSE	FALSE	FALSE
ENSDARG00000042978	FALSE	FALSE	FALSE	FALSE
ENSDARG00000004497	FALSE	FALSE	FALSE	FALSE
ENSDARG00000013830	FALSE	FALSE	FALSE	FALSE
ENSDARG00000094441	FALSE	FALSE	FALSE	FALSE
ENSDARG00000075984	FALSE	FALSE	FALSE	FALSE
ENSDARG00000046142	FALSE	FALSE	FALSE	FALSE
ENSDARG00000016999	FALSE	FALSE	FALSE	TRUE
ENSDARG00000082213	FALSE	FALSE	FALSE	FALSE
ENSDARG00000009740	FALSE	FALSE	FALSE	TRUE
ENSDARG00000051851	FALSE	FALSE	FALSE	TRUE
ENSDARG00000018953	FALSE	FALSE	FALSE	FALSE
ENSDARG00000030107	FALSE	FALSE	FALSE	FALSE
ENSDARG00000098838	FALSE	FALSE	FALSE	FALSE
ENSDARG00000061328	FALSE	FALSE	FALSE	FALSE
ENSDARG00000061585	FALSE	FALSE	FALSE	FALSE
ENSDARG00000096346	FALSE	FALSE	FALSE	FALSE
ENSDARG00000011506	FALSE	FALSE	FALSE	FALSE
ENSDARG00000086778	FALSE	FALSE	FALSE	FALSE
ENSDARG00000014439	FALSE	FALSE	FALSE	FALSE
ENSDARG00000104629	FALSE	FALSE	FALSE	FALSE
ENSDARG00000071055	FALSE	FALSE	FALSE	FALSE
ENSDARG00000006062	FALSE	FALSE	FALSE	TRUE
ENSDARG00000000229	FALSE	FALSE	FALSE	FALSE
ENSDARG00000014969	FALSE	FALSE	FALSE	FALSE
ENSDARG00000010244	FALSE	FALSE	FALSE	TRUE
ENSDARG00000099084	FALSE	FALSE	FALSE	FALSE
ENSDARG00000055474	FALSE	FALSE	FALSE	FALSE
ENSDARG00000016695	FALSE	FALSE	FALSE	FALSE
ENSDARG00000034178	FALSE	FALSE	FALSE	FALSE
ENSDARG00000104588	FALSE	FALSE	FALSE	FALSE
ENSDARG00000100359	FALSE	FALSE	FALSE	FALSE
ENSDARG00000114022	FALSE	FALSE	FALSE	FALSE
ENSDARG00000004754	FALSE	FALSE	FALSE	FALSE
ENSDARG00000005397	FALSE	FALSE	FALSE	FALSE
ENSDARG00000017431	FALSE	FALSE	FALSE	FALSE
ENSDARG00000078416	FALSE	FALSE	FALSE	FALSE
ENSDARG00000078164	FALSE	FALSE	FALSE	TRUE
ENSDARG00000054533	FALSE	TRUE	FALSE	FALSE
ENSDARG00000117284	FALSE	FALSE	FALSE	FALSE
ENSDARG00000073707	FALSE	FALSE	FALSE	TRUE
ENSDARG00000000857	FALSE	FALSE	FALSE	TRUE
ENSDARG00000062577	FALSE	FALSE	FALSE	FALSE
ENSDARG00000013317	FALSE	FALSE	FALSE	FALSE
ENSDARG00000054307	FALSE	FALSE	FALSE	FALSE
ENSDARG00000020964	FALSE	FALSE	FALSE	FALSE
ENSDARG00000053381	FALSE	FALSE	FALSE	FALSE
ENSDARG00000116510	FALSE	FALSE	FALSE	FALSE
ENSDARG00000040334	FALSE	FALSE	FALSE	TRUE
ENSDARG00000111091	FALSE	FALSE	FALSE	FALSE
ENSDARG00000087178	FALSE	FALSE	FALSE	FALSE
ENSDARG00000011371	FALSE	FALSE	FALSE	FALSE
ENSDARG00000109845	FALSE	FALSE	FALSE	FALSE
ENSDARG00000012248	FALSE	FALSE	FALSE	FALSE
ENSDARG00000009825	FALSE	FALSE	FALSE	FALSE
ENSDARG00000101630	FALSE	FALSE	FALSE	FALSE
ENSDARG00000006639	FALSE	FALSE	FALSE	FALSE
ENSDARG00000043757	FALSE	FALSE	FALSE	FALSE
ENSDARG00000091548	FALSE	FALSE	FALSE	TRUE
ENSDARG00000034808	FALSE	FALSE	FALSE	FALSE
ENSDARG00000017121	FALSE	FALSE	FALSE	FALSE
ENSDARG00000078523	FALSE	FALSE	FALSE	FALSE
ENSDARG00000070832	FALSE	FALSE	FALSE	FALSE
ENSDARG00000062695	FALSE	FALSE	FALSE	FALSE
ENSDARG00000076297	FALSE	FALSE	FALSE	FALSE
ENSDARG00000102839	FALSE	FALSE	FALSE	FALSE
ENSDARG00000092508	FALSE	FALSE	FALSE	FALSE
ENSDARG00000057055	FALSE	FALSE	FALSE	FALSE
ENSDARG00000104034	FALSE	FALSE	FALSE	FALSE
ENSDARG00000055539	FALSE	FALSE	FALSE	FALSE
ENSDARG00000100012	FALSE	FALSE	FALSE	FALSE
ENSDARG00000073737	FALSE	FALSE	FALSE	FALSE
ENSDARG00000035978	FALSE	FALSE	FALSE	FALSE
ENSDARG00000052019	FALSE	FALSE	FALSE	FALSE
ENSDARG00000007823	FALSE	FALSE	FALSE	FALSE
ENSDARG00000092483	FALSE	FALSE	FALSE	FALSE
ENSDARG00000117399	FALSE	FALSE	FALSE	FALSE
ENSDARG00000058448	FALSE	FALSE	FALSE	TRUE
ENSDARG00000034344	FALSE	FALSE	FALSE	FALSE
ENSDARG00000111106	FALSE	FALSE	FALSE	FALSE
ENSDARG00000032482	FALSE	FALSE	FALSE	FALSE
ENSDARG00000092277	FALSE	FALSE	FALSE	FALSE
ENSDARG00000019614	FALSE	FALSE	FALSE	FALSE
ENSDARG00000044549	FALSE	FALSE	FALSE	FALSE
ENSDARG00000094451	FALSE	FALSE	FALSE	FALSE
ENSDARG00000114108	FALSE	FALSE	FALSE	FALSE
ENSDARG00000029718	FALSE	FALSE	FALSE	FALSE
ENSDARG00000042708	FALSE	FALSE	FALSE	FALSE
ENSDARG00000056381	FALSE	FALSE	FALSE	FALSE
ENSDARG00000004218	FALSE	FALSE	TRUE	TRUE
ENSDARG00000015158	FALSE	FALSE	FALSE	FALSE
ENSDARG00000116570	FALSE	FALSE	FALSE	FALSE
ENSDARG00000098732	FALSE	FALSE	FALSE	FALSE
ENSDARG00000100742	FALSE	FALSE	FALSE	FALSE
ENSDARG00000075819	FALSE	FALSE	FALSE	TRUE
ENSDARG00000001710	FALSE	FALSE	FALSE	FALSE
ENSDARG00000042962	FALSE	FALSE	FALSE	FALSE
ENSDARG00000079908	FALSE	FALSE	FALSE	FALSE
ENSDARG00000089967	FALSE	FALSE	FALSE	TRUE
ENSDARG00000012060	FALSE	FALSE	FALSE	FALSE
ENSDARG00000030616	FALSE	FALSE	FALSE	FALSE
ENSDARG00000097626	FALSE	FALSE	FALSE	FALSE
ENSDARG00000077706	FALSE	FALSE	FALSE	FALSE
ENSDARG00000087203	FALSE	FALSE	FALSE	FALSE
ENSDARG00000040705	FALSE	FALSE	FALSE	FALSE
ENSDARG00000029472	FALSE	FALSE	FALSE	FALSE
ENSDARG00000034326	FALSE	FALSE	FALSE	FALSE
ENSDARG00000013443	FALSE	FALSE	FALSE	TRUE
ENSDARG00000062483	FALSE	FALSE	FALSE	FALSE
ENSDARG00000078942	FALSE	FALSE	FALSE	FALSE
ENSDARG00000011825	FALSE	FALSE	FALSE	FALSE
ENSDARG00000075108	FALSE	FALSE	FALSE	FALSE
ENSDARG00000083050	FALSE	FALSE	FALSE	FALSE
ENSDARG00000017931	FALSE	FALSE	FALSE	FALSE
ENSDARG00000042336	FALSE	FALSE	FALSE	FALSE
ENSDARG00000095388	FALSE	FALSE	FALSE	FALSE
ENSDARG00000098497	FALSE	FALSE	FALSE	FALSE
ENSDARG00000103856	FALSE	FALSE	FALSE	FALSE
ENSDARG00000094456	FALSE	FALSE	FALSE	FALSE
ENSDARG00000016788	FALSE	FALSE	FALSE	FALSE
ENSDARG00000045159	FALSE	FALSE	FALSE	FALSE
ENSDARG00000068461	FALSE	FALSE	FALSE	FALSE
ENSDARG00000097496	FALSE	FALSE	FALSE	FALSE
ENSDARG00000109375	FALSE	FALSE	FALSE	FALSE
ENSDARG00000094709	FALSE	FALSE	FALSE	FALSE
ENSDARG00000117575	FALSE	FALSE	FALSE	FALSE
ENSDARG00000100377	FALSE	FALSE	FALSE	FALSE
ENSDARG00000077396	FALSE	FALSE	FALSE	FALSE
ENSDARG00000062951	FALSE	FALSE	FALSE	FALSE
ENSDARG00000068738	FALSE	FALSE	FALSE	FALSE
ENSDARG00000099091	FALSE	FALSE	FALSE	FALSE
ENSDARG00000097277	FALSE	FALSE	FALSE	FALSE
ENSDARG00000039913	FALSE	FALSE	FALSE	FALSE
ENSDARG00000016611	FALSE	FALSE	FALSE	FALSE
ENSDARG00000078652	FALSE	FALSE	FALSE	FALSE
ENSDARG00000115166	FALSE	FALSE	FALSE	FALSE
ENSDARG00000016360	FALSE	FALSE	FALSE	TRUE
ENSDARG00000095275	FALSE	FALSE	FALSE	FALSE
ENSDARG00000036549	FALSE	FALSE	FALSE	FALSE
ENSDARG00000018393	FALSE	FALSE	FALSE	FALSE
ENSDARG00000035308	FALSE	FALSE	FALSE	FALSE
ENSDARG00000052917	FALSE	FALSE	FALSE	FALSE
ENSDARG00000068406	FALSE	FALSE	FALSE	FALSE
ENSDARG00000099101	FALSE	FALSE	FALSE	FALSE
ENSDARG00000099345	FALSE	FALSE	FALSE	FALSE
ENSDARG00000090389	FALSE	FALSE	FALSE	FALSE
ENSDARG00000054980	FALSE	FALSE	FALSE	TRUE
ENSDARG00000097384	FALSE	FALSE	FALSE	FALSE
ENSDARG00000101900	FALSE	FALSE	FALSE	FALSE
ENSDARG00000038213	FALSE	FALSE	FALSE	FALSE
ENSDARG00000004460	FALSE	FALSE	FALSE	FALSE
ENSDARG00000097849	FALSE	FALSE	FALSE	FALSE
ENSDARG00000068759	FALSE	FALSE	FALSE	FALSE
ENSDARG00000079777	FALSE	FALSE	FALSE	FALSE
ENSDARG00000035610	FALSE	FALSE	FALSE	FALSE
ENSDARG00000061173	FALSE	FALSE	FALSE	FALSE
ENSDARG00000104653	FALSE	FALSE	FALSE	FALSE
ENSDARG00000044968	FALSE	FALSE	FALSE	FALSE
ENSDARG00000106025	FALSE	FALSE	FALSE	FALSE
ENSDARG00000019191	FALSE	FALSE	TRUE	TRUE
ENSDARG00000101212	FALSE	FALSE	FALSE	FALSE
ENSDARG00000056091	FALSE	FALSE	FALSE	FALSE
ENSDARG00000024746	FALSE	FALSE	FALSE	FALSE
ENSDARG00000104693	FALSE	FALSE	FALSE	FALSE
ENSDARG00000007040	FALSE	FALSE	FALSE	FALSE
ENSDARG00000074624	TRUE	FALSE	FALSE	FALSE
ENSDARG00000042452	FALSE	FALSE	FALSE	FALSE
ENSDARG00000076799	FALSE	FALSE	FALSE	FALSE
ENSDARG00000086762	FALSE	FALSE	FALSE	FALSE
ENSDARG00000077489	FALSE	FALSE	FALSE	FALSE
ENSDARG00000090537	FALSE	FALSE	FALSE	FALSE
ENSDARG00000097598	FALSE	FALSE	FALSE	FALSE
ENSDARG00000060537	FALSE	FALSE	FALSE	FALSE
ENSDARG00000077261	FALSE	FALSE	FALSE	FALSE
ENSDARG00000077237	FALSE	FALSE	FALSE	FALSE
ENSDARG00000029894	FALSE	FALSE	FALSE	FALSE
ENSDARG00000009209	FALSE	FALSE	FALSE	FALSE
ENSDARG00000052536	FALSE	FALSE	FALSE	TRUE
ENSDARG00000004078	FALSE	FALSE	FALSE	FALSE
ENSDARG00000088260	FALSE	FALSE	FALSE	FALSE
ENSDARG00000021439	FALSE	FALSE	FALSE	TRUE
ENSDARG00000099911	FALSE	FALSE	FALSE	FALSE
ENSDARG00000106746	FALSE	FALSE	FALSE	FALSE
ENSDARG00000062103	FALSE	FALSE	FALSE	FALSE
ENSDARG00000103746	FALSE	FALSE	FALSE	FALSE
ENSDARG00000095296	FALSE	FALSE	FALSE	TRUE
ENSDARG00000092623	FALSE	FALSE	FALSE	FALSE
ENSDARG00000114221	FALSE	FALSE	FALSE	FALSE
ENSDARG00000098052	FALSE	FALSE	FALSE	FALSE
ENSDARG00000058005	FALSE	FALSE	FALSE	FALSE
ENSDARG00000011818	FALSE	FALSE	FALSE	FALSE
ENSDARG00000082222	FALSE	FALSE	FALSE	FALSE
ENSDARG00000012747	FALSE	FALSE	FALSE	FALSE
ENSDARG00000038305	FALSE	FALSE	FALSE	FALSE
ENSDARG00000096867	FALSE	FALSE	FALSE	FALSE
ENSDARG00000117521	FALSE	FALSE	FALSE	FALSE
ENSDARG00000041887	FALSE	FALSE	FALSE	TRUE
ENSDARG00000117300	FALSE	FALSE	FALSE	FALSE
ENSDARG00000097263	FALSE	FALSE	FALSE	FALSE
ENSDARG00000053468	FALSE	FALSE	FALSE	FALSE
ENSDARG00000097999	FALSE	FALSE	FALSE	FALSE
ENSDARG00000052379	FALSE	FALSE	FALSE	FALSE
ENSDARG00000000103	FALSE	FALSE	FALSE	FALSE
ENSDARG00000006420	FALSE	FALSE	FALSE	FALSE
ENSDARG00000074453	FALSE	FALSE	FALSE	FALSE
ENSDARG00000037905	FALSE	FALSE	FALSE	FALSE
ENSDARG00000079369	FALSE	FALSE	FALSE	FALSE
ENSDARG00000034534	FALSE	FALSE	FALSE	FALSE
ENSDARG00000040869	FALSE	FALSE	FALSE	FALSE
ENSDARG00000094243	FALSE	FALSE	FALSE	FALSE
ENSDARG00000073988	FALSE	FALSE	FALSE	FALSE
ENSDARG00000052138	FALSE	FALSE	FALSE	FALSE
ENSDARG00000104311	FALSE	FALSE	FALSE	FALSE
ENSDARG00000056191	FALSE	FALSE	FALSE	FALSE
ENSDARG00000013025	FALSE	FALSE	FALSE	TRUE
ENSDARG00000084594	FALSE	FALSE	FALSE	FALSE
ENSDARG00000068661	FALSE	FALSE	FALSE	FALSE
ENSDARG00000020850	TRUE	TRUE	FALSE	TRUE
ENSDARG00000081613	FALSE	FALSE	FALSE	FALSE
ENSDARG00000054539	FALSE	FALSE	FALSE	FALSE
ENSDARG00000030367	FALSE	FALSE	FALSE	FALSE
ENSDARG00000012866	FALSE	FALSE	FALSE	FALSE
ENSDARG00000099485	FALSE	FALSE	FALSE	FALSE
ENSDARG00000104106	FALSE	FALSE	FALSE	FALSE
ENSDARG00000075616	FALSE	FALSE	FALSE	TRUE
ENSDARG00000010655	FALSE	FALSE	FALSE	FALSE
ENSDARG00000083238	FALSE	FALSE	FALSE	FALSE
ENSDARG00000018383	FALSE	FALSE	FALSE	TRUE
ENSDARG00000088877	FALSE	FALSE	FALSE	FALSE
ENSDARG00000117819	FALSE	FALSE	FALSE	FALSE
ENSDARG00000037889	FALSE	FALSE	FALSE	FALSE
ENSDARG00000076796	FALSE	FALSE	FALSE	FALSE
ENSDARG00000097284	FALSE	FALSE	FALSE	FALSE
ENSDARG00000100725	FALSE	FALSE	FALSE	FALSE
ENSDARG00000078216	FALSE	FALSE	FALSE	FALSE
ENSDARG00000083309	FALSE	FALSE	FALSE	FALSE
ENSDARG00000079126	FALSE	FALSE	FALSE	FALSE
ENSDARG00000038672	FALSE	FALSE	FALSE	FALSE
ENSDARG00000026865	FALSE	FALSE	FALSE	FALSE
ENSDARG00000058212	FALSE	FALSE	FALSE	TRUE
ENSDARG00000116732	FALSE	FALSE	FALSE	FALSE
ENSDARG00000088044	FALSE	FALSE	FALSE	FALSE
ENSDARG00000077404	FALSE	FALSE	FALSE	FALSE
ENSDARG00000110989	FALSE	FALSE	FALSE	FALSE
ENSDARG00000031216	FALSE	TRUE	FALSE	FALSE
ENSDARG00000013024	FALSE	FALSE	FALSE	FALSE
ENSDARG00000045555	FALSE	FALSE	FALSE	FALSE
ENSDARG00000053133	FALSE	FALSE	FALSE	FALSE
ENSDARG00000078186	FALSE	FALSE	FALSE	FALSE
ENSDARG00000115704	FALSE	FALSE	FALSE	FALSE
ENSDARG00000101720	FALSE	FALSE	FALSE	FALSE
ENSDARG00000104139	FALSE	FALSE	FALSE	FALSE
ENSDARG00000079608	FALSE	FALSE	FALSE	FALSE
ENSDARG00000041685	FALSE	FALSE	FALSE	FALSE
ENSDARG00000055123	FALSE	FALSE	FALSE	FALSE
ENSDARG00000045219	TRUE	TRUE	FALSE	TRUE
ENSDARG00000069675	FALSE	FALSE	FALSE	FALSE
ENSDARG00000035595	FALSE	FALSE	FALSE	FALSE
ENSDARG00000086393	FALSE	FALSE	FALSE	FALSE
ENSDARG00000116588	FALSE	FALSE	FALSE	FALSE
ENSDARG00000074086	FALSE	FALSE	FALSE	FALSE
ENSDARG00000062206	FALSE	FALSE	FALSE	FALSE
ENSDARG00000061461	FALSE	FALSE	FALSE	FALSE
ENSDARG00000092950	FALSE	FALSE	FALSE	FALSE
ENSDARG00000005479	FALSE	FALSE	FALSE	FALSE
ENSDARG00000070173	FALSE	FALSE	FALSE	FALSE
ENSDARG00000053868	FALSE	FALSE	FALSE	FALSE
ENSDARG00000098171	FALSE	FALSE	FALSE	FALSE
ENSDARG00000020079	FALSE	FALSE	FALSE	FALSE
ENSDARG00000077400	FALSE	FALSE	FALSE	FALSE
ENSDARG00000061923	FALSE	TRUE	FALSE	TRUE
ENSDARG00000113412	FALSE	FALSE	FALSE	FALSE
ENSDARG00000075284	FALSE	FALSE	FALSE	FALSE
ENSDARG00000054220	FALSE	FALSE	FALSE	FALSE
ENSDARG00000088100	FALSE	FALSE	FALSE	FALSE
ENSDARG00000097101	FALSE	FALSE	FALSE	FALSE
ENSDARG00000059256	FALSE	FALSE	FALSE	FALSE
ENSDARG00000019897	FALSE	FALSE	FALSE	TRUE
ENSDARG00000091471	FALSE	FALSE	FALSE	FALSE
ENSDARG00000016664	FALSE	FALSE	FALSE	FALSE
ENSDARG00000055133	FALSE	FALSE	FALSE	TRUE
ENSDARG00000115296	FALSE	FALSE	FALSE	FALSE
ENSDARG00000028661	FALSE	FALSE	FALSE	FALSE
ENSDARG00000092610	FALSE	FALSE	FALSE	FALSE
ENSDARG00000057287	FALSE	FALSE	FALSE	TRUE
ENSDARG00000014488	FALSE	FALSE	FALSE	FALSE
ENSDARG00000053179	FALSE	FALSE	FALSE	FALSE
ENSDARG00000055433	FALSE	FALSE	FALSE	FALSE
ENSDARG00000107253	FALSE	FALSE	FALSE	FALSE
ENSDARG00000006981	FALSE	FALSE	FALSE	FALSE
ENSDARG00000006939	FALSE	FALSE	FALSE	TRUE
ENSDARG00000017882	FALSE	FALSE	FALSE	FALSE
ENSDARG00000075151	FALSE	FALSE	FALSE	FALSE
ENSDARG00000056130	FALSE	FALSE	FALSE	FALSE
ENSDARG00000004302	FALSE	FALSE	FALSE	FALSE
ENSDARG00000096876	FALSE	FALSE	FALSE	FALSE
ENSDARG00000110936	FALSE	FALSE	FALSE	FALSE
ENSDARG00000031427	FALSE	FALSE	FALSE	FALSE
ENSDARG00000116969	FALSE	FALSE	FALSE	FALSE
ENSDARG00000101019	FALSE	FALSE	FALSE	FALSE
ENSDARG00000091633	FALSE	FALSE	FALSE	FALSE
ENSDARG00000115389	FALSE	FALSE	FALSE	FALSE
ENSDARG00000013422	FALSE	FALSE	FALSE	FALSE
ENSDARG00000082020	FALSE	FALSE	FALSE	FALSE
ENSDARG00000074662	FALSE	FALSE	FALSE	FALSE
ENSDARG00000083285	FALSE	FALSE	FALSE	FALSE
ENSDARG00000036675	TRUE	TRUE	TRUE	TRUE
ENSDARG00000004141	FALSE	FALSE	FALSE	FALSE
ENSDARG00000101069	FALSE	FALSE	FALSE	FALSE
ENSDARG00000105397	FALSE	FALSE	FALSE	FALSE
ENSDARG00000029663	FALSE	FALSE	FALSE	FALSE
ENSDARG00000117621	FALSE	FALSE	FALSE	FALSE
ENSDARG00000036180	FALSE	FALSE	FALSE	FALSE
ENSDARG00000078576	FALSE	FALSE	FALSE	FALSE
ENSDARG00000103540	FALSE	FALSE	FALSE	FALSE
ENSDARG00000015325	FALSE	FALSE	FALSE	TRUE
ENSDARG00000017266	FALSE	FALSE	FALSE	FALSE
ENSDARG00000037708	FALSE	FALSE	FALSE	TRUE
ENSDARG00000104353	FALSE	FALSE	FALSE	FALSE
ENSDARG00000092327	FALSE	FALSE	FALSE	FALSE
ENSDARG00000078807	FALSE	FALSE	FALSE	FALSE
ENSDARG00000051921	FALSE	FALSE	FALSE	TRUE
ENSDARG00000016573	FALSE	FALSE	FALSE	FALSE
ENSDARG00000019810	FALSE	TRUE	FALSE	TRUE
ENSDARG00000015607	FALSE	FALSE	FALSE	FALSE
ENSDARG00000070913	FALSE	FALSE	FALSE	TRUE
ENSDARG00000100836	FALSE	FALSE	FALSE	FALSE
ENSDARG00000008174	FALSE	FALSE	FALSE	FALSE
ENSDARG00000078688	FALSE	FALSE	FALSE	FALSE
ENSDARG00000102245	FALSE	FALSE	FALSE	FALSE
ENSDARG00000053209	FALSE	FALSE	FALSE	TRUE
ENSDARG00000080942	FALSE	FALSE	FALSE	FALSE
ENSDARG00000023190	FALSE	FALSE	FALSE	FALSE
ENSDARG00000006353	FALSE	FALSE	TRUE	TRUE
ENSDARG00000002523	FALSE	FALSE	FALSE	FALSE
ENSDARG00000045398	FALSE	FALSE	FALSE	FALSE
ENSDARG00000077569	FALSE	FALSE	FALSE	FALSE
ENSDARG00000031709	FALSE	FALSE	FALSE	FALSE
ENSDARG00000102902	FALSE	FALSE	FALSE	FALSE
ENSDARG00000105243	FALSE	FALSE	FALSE	FALSE
ENSDARG00000090036	FALSE	FALSE	FALSE	FALSE
ENSDARG00000004291	FALSE	FALSE	FALSE	FALSE
ENSDARG00000110604	FALSE	FALSE	FALSE	FALSE
ENSDARG00000112688	FALSE	FALSE	FALSE	FALSE
ENSDARG00000076414	FALSE	FALSE	FALSE	FALSE
ENSDARG00000068374	FALSE	FALSE	FALSE	FALSE
ENSDARG00000019195	FALSE	FALSE	FALSE	FALSE
ENSDARG00000014215	FALSE	FALSE	FALSE	FALSE
ENSDARG00000060434	FALSE	FALSE	FALSE	FALSE
ENSDARG00000034693	FALSE	FALSE	FALSE	FALSE
ENSDARG00000013346	FALSE	FALSE	FALSE	FALSE
ENSDARG00000019658	FALSE	FALSE	FALSE	FALSE
ENSDARG00000075192	FALSE	FALSE	FALSE	FALSE
ENSDARG00000029112	FALSE	FALSE	FALSE	FALSE
ENSDARG00000115918	FALSE	FALSE	FALSE	FALSE
ENSDARG00000027183	FALSE	FALSE	FALSE	TRUE
ENSDARG00000057113	FALSE	FALSE	FALSE	FALSE
ENSDARG00000104530	FALSE	FALSE	FALSE	FALSE
ENSDARG00000096384	FALSE	FALSE	FALSE	FALSE
ENSDARG00000101696	FALSE	FALSE	FALSE	FALSE
ENSDARG00000095458	FALSE	FALSE	FALSE	FALSE
ENSDARG00000103290	FALSE	FALSE	FALSE	FALSE
ENSDARG00000063001	FALSE	FALSE	FALSE	FALSE
ENSDARG00000099694	FALSE	FALSE	FALSE	FALSE
ENSDARG00000077596	FALSE	FALSE	FALSE	FALSE
ENSDARG00000098912	FALSE	FALSE	FALSE	FALSE
ENSDARG00000015731	FALSE	FALSE	FALSE	TRUE
ENSDARG00000007791	FALSE	FALSE	FALSE	FALSE
ENSDARG00000102482	FALSE	FALSE	FALSE	FALSE
ENSDARG00000008034	FALSE	FALSE	FALSE	FALSE
ENSDARG00000094631	FALSE	FALSE	FALSE	FALSE
ENSDARG00000106837	FALSE	FALSE	FALSE	FALSE
ENSDARG00000007787	FALSE	FALSE	FALSE	FALSE
ENSDARG00000094126	FALSE	FALSE	FALSE	FALSE
ENSDARG00000060554	FALSE	FALSE	FALSE	FALSE
ENSDARG00000020053	FALSE	FALSE	FALSE	TRUE
ENSDARG00000116708	FALSE	FALSE	FALSE	FALSE
ENSDARG00000096914	FALSE	FALSE	FALSE	FALSE
ENSDARG00000012005	FALSE	FALSE	FALSE	FALSE
ENSDARG00000059398	FALSE	FALSE	FALSE	FALSE
ENSDARG00000018840	FALSE	FALSE	FALSE	FALSE
ENSDARG00000101994	FALSE	FALSE	FALSE	FALSE
ENSDARG00000000018	FALSE	FALSE	FALSE	TRUE
ENSDARG00000016769	FALSE	FALSE	FALSE	FALSE
ENSDARG00000082127	FALSE	FALSE	FALSE	FALSE
ENSDARG00000087369	FALSE	FALSE	FALSE	FALSE
ENSDARG00000061044	FALSE	FALSE	FALSE	FALSE
ENSDARG00000097692	FALSE	FALSE	FALSE	FALSE
ENSDARG00000042727	FALSE	FALSE	FALSE	FALSE
ENSDARG00000039899	FALSE	FALSE	FALSE	TRUE
ENSDARG00000015628	FALSE	FALSE	FALSE	FALSE
ENSDARG00000098990	FALSE	FALSE	FALSE	FALSE
ENSDARG00000070109	FALSE	FALSE	FALSE	FALSE
ENSDARG00000109575	FALSE	FALSE	FALSE	FALSE
ENSDARG00000000966	FALSE	FALSE	FALSE	FALSE
ENSDARG00000084475	FALSE	FALSE	FALSE	FALSE
ENSDARG00000031985	FALSE	FALSE	FALSE	FALSE
ENSDARG00000020509	FALSE	FALSE	FALSE	FALSE
ENSDARG00000014498	FALSE	FALSE	FALSE	FALSE
ENSDARG00000097087	FALSE	FALSE	FALSE	FALSE
ENSDARG00000061656	FALSE	FALSE	FALSE	FALSE
ENSDARG00000011769	FALSE	FALSE	FALSE	FALSE
ENSDARG00000094625	FALSE	FALSE	FALSE	FALSE
ENSDARG00000109107	FALSE	FALSE	FALSE	FALSE
ENSDARG00000041248	FALSE	FALSE	FALSE	FALSE
ENSDARG00000062573	FALSE	FALSE	FALSE	FALSE
ENSDARG00000028976	FALSE	FALSE	FALSE	TRUE
ENSDARG00000045262	FALSE	FALSE	FALSE	FALSE
ENSDARG00000109896	FALSE	FALSE	FALSE	FALSE
ENSDARG00000086052	FALSE	FALSE	FALSE	FALSE
ENSDARG00000051736	FALSE	TRUE	FALSE	FALSE
ENSDARG00000105414	FALSE	FALSE	FALSE	FALSE
ENSDARG00000111090	FALSE	FALSE	FALSE	FALSE
ENSDARG00000016200	FALSE	TRUE	FALSE	TRUE
ENSDARG00000011890	FALSE	FALSE	FALSE	FALSE
ENSDARG00000044072	FALSE	FALSE	FALSE	FALSE
ENSDARG00000073944	FALSE	FALSE	FALSE	FALSE
ENSDARG00000026035	FALSE	FALSE	FALSE	FALSE
ENSDARG00000091692	FALSE	FALSE	FALSE	FALSE
ENSDARG00000062382	FALSE	FALSE	FALSE	FALSE
ENSDARG00000070280	FALSE	FALSE	FALSE	FALSE
ENSDARG00000112922	FALSE	FALSE	FALSE	FALSE
ENSDARG00000006409	FALSE	FALSE	FALSE	TRUE
ENSDARG00000089480	FALSE	FALSE	FALSE	FALSE
ENSDARG00000099842	FALSE	FALSE	FALSE	FALSE
ENSDARG00000045542	FALSE	FALSE	FALSE	FALSE
ENSDARG00000044345	FALSE	FALSE	FALSE	TRUE
ENSDARG00000069037	FALSE	FALSE	FALSE	FALSE
ENSDARG00000042456	FALSE	FALSE	FALSE	FALSE
ENSDARG00000004415	FALSE	FALSE	FALSE	FALSE
ENSDARG00000015611	TRUE	TRUE	FALSE	TRUE
ENSDARG00000085728	FALSE	FALSE	FALSE	FALSE
ENSDARG00000008383	FALSE	FALSE	FALSE	TRUE
ENSDARG00000115656	FALSE	FALSE	FALSE	FALSE
ENSDARG00000071877	FALSE	FALSE	FALSE	FALSE
ENSDARG00000061549	FALSE	FALSE	FALSE	FALSE
ENSDARG00000075536	FALSE	FALSE	FALSE	FALSE
ENSDARG00000008414	FALSE	FALSE	FALSE	FALSE
ENSDARG00000079591	FALSE	FALSE	FALSE	FALSE
ENSDARG00000043395	FALSE	FALSE	FALSE	FALSE
ENSDARG00000117763	FALSE	FALSE	FALSE	FALSE
ENSDARG00000101209	FALSE	FALSE	FALSE	FALSE
ENSDARG00000019686	FALSE	FALSE	FALSE	FALSE
ENSDARG00000029168	FALSE	FALSE	FALSE	TRUE
ENSDARG00000074225	FALSE	FALSE	FALSE	FALSE
ENSDARG00000061697	FALSE	FALSE	FALSE	FALSE
ENSDARG00000087558	FALSE	FALSE	FALSE	FALSE
ENSDARG00000004171	FALSE	FALSE	FALSE	FALSE
ENSDARG00000088022	FALSE	FALSE	FALSE	FALSE
ENSDARG00000016089	FALSE	FALSE	FALSE	FALSE
ENSDARG00000058504	FALSE	FALSE	FALSE	FALSE
ENSDARG00000080923	FALSE	FALSE	FALSE	FALSE
ENSDARG00000098238	FALSE	FALSE	FALSE	FALSE
ENSDARG00000055635	FALSE	FALSE	FALSE	FALSE
ENSDARG00000036457	FALSE	FALSE	FALSE	FALSE
ENSDARG00000010113	FALSE	FALSE	FALSE	FALSE
ENSDARG00000099776	FALSE	FALSE	FALSE	FALSE
ENSDARG00000060102	FALSE	FALSE	FALSE	FALSE
ENSDARG00000056678	FALSE	FALSE	FALSE	TRUE
ENSDARG00000032298	FALSE	FALSE	FALSE	FALSE
ENSDARG00000021669	FALSE	FALSE	FALSE	FALSE
ENSDARG00000114405	FALSE	FALSE	FALSE	FALSE
ENSDARG00000092185	FALSE	FALSE	FALSE	FALSE
ENSDARG00000087674	FALSE	FALSE	FALSE	FALSE
ENSDARG00000059357	FALSE	FALSE	FALSE	TRUE
ENSDARG00000061459	FALSE	FALSE	FALSE	TRUE
ENSDARG00000111666	FALSE	FALSE	FALSE	FALSE
ENSDARG00000101332	FALSE	FALSE	FALSE	FALSE
ENSDARG00000008678	FALSE	FALSE	FALSE	FALSE
ENSDARG00000080010	FALSE	FALSE	FALSE	FALSE
ENSDARG00000017385	FALSE	FALSE	FALSE	FALSE
ENSDARG00000099336	FALSE	FALSE	FALSE	FALSE
ENSDARG00000054032	FALSE	FALSE	FALSE	FALSE
ENSDARG00000097532	FALSE	FALSE	FALSE	FALSE
ENSDARG00000059020	FALSE	FALSE	FALSE	FALSE
ENSDARG00000097944	FALSE	FALSE	FALSE	FALSE
ENSDARG00000077018	FALSE	FALSE	FALSE	FALSE
ENSDARG00000075849	FALSE	FALSE	FALSE	FALSE
ENSDARG00000059362	FALSE	FALSE	FALSE	FALSE
ENSDARG00000101311	FALSE	FALSE	FALSE	FALSE
ENSDARG00000094736	FALSE	FALSE	FALSE	FALSE
ENSDARG00000097029	FALSE	FALSE	FALSE	FALSE
ENSDARG00000019033	FALSE	FALSE	FALSE	FALSE
ENSDARG00000078489	FALSE	FALSE	FALSE	FALSE
ENSDARG00000023712	FALSE	FALSE	FALSE	FALSE
ENSDARG00000088181	FALSE	FALSE	FALSE	FALSE
ENSDARG00000116491	FALSE	FALSE	FALSE	FALSE
ENSDARG00000074335	FALSE	FALSE	FALSE	FALSE
ENSDARG00000085174	FALSE	FALSE	FALSE	FALSE
ENSDARG00000045139	FALSE	FALSE	FALSE	FALSE
ENSDARG00000060309	FALSE	FALSE	FALSE	FALSE
ENSDARG00000117232	FALSE	FALSE	FALSE	FALSE
ENSDARG00000013379	FALSE	FALSE	FALSE	FALSE
ENSDARG00000020467	FALSE	FALSE	FALSE	TRUE
ENSDARG00000037929	FALSE	FALSE	FALSE	FALSE
ENSDARG00000010085	FALSE	FALSE	FALSE	FALSE
ENSDARG00000041226	FALSE	FALSE	FALSE	FALSE
ENSDARG00000087911	FALSE	FALSE	FALSE	FALSE
ENSDARG00000032619	TRUE	FALSE	FALSE	FALSE
ENSDARG00000109823	FALSE	FALSE	FALSE	FALSE
ENSDARG00000117244	FALSE	FALSE	FALSE	FALSE
ENSDARG00000100071	FALSE	FALSE	FALSE	FALSE
ENSDARG00000089156	FALSE	FALSE	FALSE	FALSE
ENSDARG00000028815	FALSE	FALSE	FALSE	FALSE
ENSDARG00000043938	FALSE	FALSE	FALSE	TRUE
ENSDARG00000112817	FALSE	FALSE	FALSE	FALSE
ENSDARG00000092528	FALSE	FALSE	FALSE	FALSE
ENSDARG00000101561	FALSE	FALSE	FALSE	FALSE
ENSDARG00000042221	FALSE	FALSE	FALSE	TRUE
ENSDARG00000060070	FALSE	FALSE	FALSE	FALSE
ENSDARG00000042742	FALSE	FALSE	FALSE	TRUE
ENSDARG00000096489	FALSE	FALSE	FALSE	FALSE
ENSDARG00000079530	FALSE	FALSE	FALSE	FALSE
ENSDARG00000114950	FALSE	FALSE	FALSE	FALSE
ENSDARG00000055510	FALSE	FALSE	FALSE	FALSE
ENSDARG00000094010	FALSE	FALSE	FALSE	FALSE
ENSDARG00000005463	FALSE	FALSE	FALSE	TRUE
ENSDARG00000045342	FALSE	FALSE	FALSE	TRUE
ENSDARG00000095639	FALSE	FALSE	FALSE	FALSE
ENSDARG00000101591	FALSE	FALSE	FALSE	FALSE
ENSDARG00000045803	FALSE	FALSE	FALSE	TRUE
ENSDARG00000036298	FALSE	TRUE	FALSE	TRUE
ENSDARG00000059987	FALSE	FALSE	FALSE	FALSE
ENSDARG00000025693	FALSE	FALSE	FALSE	FALSE
ENSDARG00000016519	FALSE	FALSE	FALSE	FALSE
ENSDARG00000054334	FALSE	FALSE	FALSE	FALSE
ENSDARG00000011533	FALSE	FALSE	TRUE	TRUE
ENSDARG00000053950	FALSE	FALSE	FALSE	FALSE
ENSDARG00000062083	FALSE	FALSE	FALSE	FALSE
ENSDARG00000021573	FALSE	FALSE	FALSE	FALSE
ENSDARG00000042277	FALSE	FALSE	FALSE	FALSE
ENSDARG00000087657	FALSE	FALSE	FALSE	FALSE
ENSDARG00000104103	FALSE	FALSE	FALSE	FALSE
ENSDARG00000077581	FALSE	FALSE	FALSE	FALSE
ENSDARG00000040803	FALSE	FALSE	FALSE	FALSE
ENSDARG00000020655	FALSE	FALSE	FALSE	FALSE
ENSDARG00000113703	FALSE	FALSE	FALSE	FALSE
ENSDARG00000004592	FALSE	FALSE	FALSE	FALSE
ENSDARG00000076978	FALSE	FALSE	FALSE	FALSE
ENSDARG00000092387	FALSE	FALSE	FALSE	FALSE
ENSDARG00000023820	FALSE	FALSE	FALSE	FALSE
ENSDARG00000080422	FALSE	FALSE	FALSE	FALSE
ENSDARG00000038074	FALSE	FALSE	FALSE	TRUE
ENSDARG00000039892	FALSE	FALSE	FALSE	FALSE
ENSDARG00000096894	FALSE	FALSE	FALSE	FALSE
ENSDARG00000070743	FALSE	FALSE	FALSE	FALSE
ENSDARG00000053517	FALSE	FALSE	FALSE	FALSE
ENSDARG00000036482	FALSE	FALSE	FALSE	FALSE
ENSDARG00000012874	FALSE	FALSE	FALSE	FALSE
ENSDARG00000058369	TRUE	TRUE	FALSE	TRUE
ENSDARG00000005468	FALSE	FALSE	FALSE	FALSE
ENSDARG00000006477	FALSE	FALSE	FALSE	TRUE
ENSDARG00000031756	FALSE	FALSE	FALSE	FALSE
ENSDARG00000082087	FALSE	FALSE	FALSE	FALSE
ENSDARG00000025017	FALSE	FALSE	FALSE	FALSE
ENSDARG00000041217	FALSE	FALSE	FALSE	FALSE
ENSDARG00000045401	FALSE	FALSE	FALSE	FALSE
ENSDARG00000104495	FALSE	FALSE	FALSE	FALSE
ENSDARG00000016649	FALSE	FALSE	FALSE	FALSE
ENSDARG00000101493	FALSE	FALSE	FALSE	FALSE
ENSDARG00000035859	FALSE	FALSE	FALSE	FALSE
ENSDARG00000056267	FALSE	FALSE	FALSE	FALSE
ENSDARG00000036164	FALSE	FALSE	FALSE	FALSE
ENSDARG00000057805	FALSE	FALSE	FALSE	FALSE
ENSDARG00000113699	FALSE	FALSE	FALSE	FALSE
ENSDARG00000101919	FALSE	FALSE	FALSE	FALSE
ENSDARG00000061896	FALSE	FALSE	FALSE	FALSE
ENSDARG00000088567	FALSE	FALSE	FALSE	FALSE
ENSDARG00000056134	FALSE	FALSE	FALSE	FALSE
ENSDARG00000015552	FALSE	FALSE	FALSE	FALSE
ENSDARG00000117500	FALSE	FALSE	FALSE	FALSE
ENSDARG00000019613	FALSE	FALSE	FALSE	FALSE
ENSDARG00000071465	FALSE	FALSE	FALSE	FALSE
ENSDARG00000045015	FALSE	FALSE	FALSE	FALSE
ENSDARG00000016490	FALSE	FALSE	FALSE	FALSE
ENSDARG00000014017	FALSE	FALSE	FALSE	FALSE
ENSDARG00000018891	FALSE	FALSE	FALSE	FALSE
ENSDARG00000070348	FALSE	FALSE	FALSE	FALSE
ENSDARG00000074314	FALSE	FALSE	FALSE	FALSE
ENSDARG00000090366	FALSE	FALSE	FALSE	FALSE
ENSDARG00000001557	FALSE	FALSE	FALSE	FALSE
ENSDARG00000085080	FALSE	FALSE	FALSE	FALSE
ENSDARG00000016514	FALSE	FALSE	FALSE	FALSE
ENSDARG00000093378	FALSE	FALSE	FALSE	TRUE
ENSDARG00000083537	FALSE	FALSE	FALSE	FALSE
ENSDARG00000025789	FALSE	FALSE	FALSE	FALSE
ENSDARG00000076703	FALSE	FALSE	FALSE	FALSE
ENSDARG00000071586	FALSE	FALSE	FALSE	FALSE
ENSDARG00000004094	FALSE	FALSE	FALSE	TRUE
ENSDARG00000077650	FALSE	FALSE	FALSE	FALSE
ENSDARG00000056473	FALSE	FALSE	FALSE	FALSE
ENSDARG00000092362	FALSE	FALSE	FALSE	FALSE
ENSDARG00000089636	FALSE	FALSE	FALSE	FALSE
ENSDARG00000104573	FALSE	FALSE	FALSE	FALSE
ENSDARG00000010784	FALSE	FALSE	FALSE	FALSE
ENSDARG00000068397	FALSE	FALSE	FALSE	FALSE
ENSDARG00000092774	FALSE	FALSE	FALSE	FALSE
ENSDARG00000079248	FALSE	FALSE	FALSE	FALSE
ENSDARG00000108788	FALSE	FALSE	FALSE	FALSE
ENSDARG00000056050	FALSE	FALSE	FALSE	TRUE
ENSDARG00000040254	FALSE	FALSE	FALSE	FALSE
ENSDARG00000090126	FALSE	FALSE	FALSE	FALSE
ENSDARG00000104571	FALSE	FALSE	FALSE	FALSE
ENSDARG00000097622	FALSE	FALSE	FALSE	FALSE
ENSDARG00000109727	FALSE	FALSE	FALSE	FALSE
ENSDARG00000027824	FALSE	FALSE	FALSE	FALSE
ENSDARG00000021399	FALSE	FALSE	FALSE	FALSE
ENSDARG00000062562	FALSE	FALSE	FALSE	FALSE
ENSDARG00000103609	FALSE	FALSE	FALSE	FALSE
ENSDARG00000055307	FALSE	FALSE	FALSE	FALSE
ENSDARG00000108486	FALSE	FALSE	FALSE	FALSE
ENSDARG00000093614	FALSE	FALSE	FALSE	FALSE
ENSDARG00000056150	FALSE	FALSE	FALSE	FALSE
ENSDARG00000102228	FALSE	FALSE	FALSE	FALSE
ENSDARG00000024195	FALSE	FALSE	FALSE	FALSE
ENSDARG00000102066	FALSE	FALSE	FALSE	FALSE
ENSDARG00000052037	FALSE	FALSE	FALSE	FALSE
ENSDARG00000055429	FALSE	FALSE	FALSE	FALSE
ENSDARG00000026296	FALSE	FALSE	TRUE	TRUE
ENSDARG00000075700	FALSE	FALSE	FALSE	FALSE
ENSDARG00000015752	FALSE	FALSE	FALSE	FALSE
ENSDARG00000103207	FALSE	FALSE	FALSE	FALSE
ENSDARG00000022503	FALSE	FALSE	FALSE	FALSE
ENSDARG00000018653	FALSE	FALSE	FALSE	FALSE
ENSDARG00000044688	FALSE	FALSE	FALSE	TRUE
ENSDARG00000089947	FALSE	FALSE	FALSE	FALSE
ENSDARG00000041450	FALSE	FALSE	FALSE	FALSE
ENSDARG00000117242	FALSE	FALSE	FALSE	FALSE
ENSDARG00000057403	FALSE	FALSE	FALSE	FALSE
ENSDARG00000020328	FALSE	FALSE	FALSE	FALSE
ENSDARG00000062593	FALSE	FALSE	FALSE	TRUE
ENSDARG00000078964	FALSE	FALSE	FALSE	FALSE
ENSDARG00000005453	FALSE	FALSE	FALSE	FALSE
ENSDARG00000019596	FALSE	FALSE	FALSE	FALSE
ENSDARG00000006944	FALSE	FALSE	FALSE	FALSE
ENSDARG00000003235	FALSE	FALSE	FALSE	FALSE
ENSDARG00000000380	FALSE	FALSE	FALSE	FALSE
ENSDARG00000063219	FALSE	FALSE	FALSE	TRUE
ENSDARG00000098401	FALSE	FALSE	FALSE	FALSE
ENSDARG00000098871	FALSE	FALSE	FALSE	FALSE
ENSDARG00000042551	FALSE	FALSE	FALSE	FALSE
ENSDARG00000111458	FALSE	FALSE	FALSE	FALSE
ENSDARG00000099913	FALSE	FALSE	FALSE	FALSE
ENSDARG00000070358	FALSE	FALSE	FALSE	FALSE
ENSDARG00000108221	FALSE	FALSE	FALSE	FALSE
ENSDARG00000113984	FALSE	FALSE	FALSE	FALSE
ENSDARG00000070698	FALSE	FALSE	FALSE	TRUE
ENSDARG00000104901	FALSE	FALSE	FALSE	FALSE
ENSDARG00000082842	FALSE	FALSE	FALSE	FALSE
ENSDARG00000010630	FALSE	FALSE	FALSE	FALSE
ENSDARG00000095555	FALSE	FALSE	FALSE	FALSE
ENSDARG00000097900	FALSE	FALSE	FALSE	FALSE
ENSDARG00000105348	FALSE	FALSE	FALSE	FALSE
ENSDARG00000111972	FALSE	FALSE	FALSE	FALSE
ENSDARG00000099139	FALSE	FALSE	FALSE	FALSE
ENSDARG00000092112	FALSE	FALSE	FALSE	FALSE
ENSDARG00000040620	FALSE	FALSE	FALSE	FALSE
ENSDARG00000062884	FALSE	FALSE	FALSE	FALSE
ENSDARG00000102578	FALSE	FALSE	FALSE	FALSE
ENSDARG00000055022	FALSE	FALSE	FALSE	TRUE
ENSDARG00000100497	FALSE	FALSE	FALSE	FALSE
ENSDARG00000074591	FALSE	FALSE	FALSE	TRUE
ENSDARG00000089086	FALSE	FALSE	FALSE	FALSE
ENSDARG00000087452	FALSE	FALSE	FALSE	FALSE
ENSDARG00000100251	FALSE	FALSE	FALSE	FALSE
ENSDARG00000089217	FALSE	FALSE	FALSE	FALSE
ENSDARG00000096910	FALSE	FALSE	FALSE	FALSE
ENSDARG00000055026	FALSE	FALSE	FALSE	FALSE
ENSDARG00000029751	FALSE	FALSE	FALSE	FALSE
ENSDARG00000035942	FALSE	FALSE	FALSE	FALSE
ENSDARG00000098999	FALSE	FALSE	FALSE	FALSE
ENSDARG00000032951	FALSE	FALSE	FALSE	FALSE
ENSDARG00000021115	FALSE	FALSE	FALSE	FALSE
ENSDARG00000110103	FALSE	FALSE	FALSE	FALSE
ENSDARG00000075584	FALSE	FALSE	FALSE	FALSE
ENSDARG00000002847	FALSE	FALSE	FALSE	FALSE
ENSDARG00000116679	FALSE	FALSE	FALSE	FALSE
ENSDARG00000017004	FALSE	FALSE	FALSE	FALSE
ENSDARG00000008852	FALSE	FALSE	FALSE	FALSE
ENSDARG00000082005	FALSE	FALSE	FALSE	FALSE
ENSDARG00000079034	FALSE	FALSE	FALSE	FALSE
ENSDARG00000016016	FALSE	FALSE	FALSE	FALSE
ENSDARG00000042477	FALSE	FALSE	FALSE	FALSE
ENSDARG00000058696	FALSE	FALSE	FALSE	TRUE
ENSDARG00000110757	FALSE	FALSE	FALSE	FALSE
ENSDARG00000079769	FALSE	FALSE	FALSE	FALSE
ENSDARG00000061233	FALSE	FALSE	FALSE	FALSE
ENSDARG00000108787	FALSE	FALSE	FALSE	FALSE
ENSDARG00000036645	FALSE	FALSE	FALSE	FALSE
ENSDARG00000076104	FALSE	FALSE	FALSE	TRUE
ENSDARG00000096956	FALSE	FALSE	FALSE	FALSE
ENSDARG00000053586	FALSE	FALSE	FALSE	FALSE
ENSDARG00000010155	FALSE	FALSE	FALSE	FALSE
ENSDARG00000062402	FALSE	FALSE	FALSE	FALSE
ENSDARG00000056027	FALSE	FALSE	FALSE	FALSE
ENSDARG00000039218	FALSE	FALSE	FALSE	FALSE
ENSDARG00000037965	FALSE	FALSE	FALSE	TRUE
ENSDARG00000096981	FALSE	FALSE	FALSE	FALSE
ENSDARG00000068168	FALSE	FALSE	FALSE	FALSE
ENSDARG00000059658	FALSE	FALSE	FALSE	FALSE
ENSDARG00000076121	FALSE	FALSE	FALSE	FALSE
ENSDARG00000031506	FALSE	FALSE	FALSE	FALSE
ENSDARG00000060682	FALSE	FALSE	FALSE	TRUE
ENSDARG00000091783	FALSE	FALSE	FALSE	FALSE
ENSDARG00000016093	FALSE	FALSE	FALSE	FALSE
ENSDARG00000031495	TRUE	FALSE	FALSE	TRUE
ENSDARG00000104641	FALSE	FALSE	FALSE	FALSE
ENSDARG00000095167	FALSE	FALSE	FALSE	FALSE
ENSDARG00000055743	FALSE	FALSE	FALSE	FALSE
ENSDARG00000055797	FALSE	FALSE	FALSE	FALSE
ENSDARG00000104058	FALSE	FALSE	FALSE	FALSE
ENSDARG00000056475	FALSE	FALSE	FALSE	TRUE
ENSDARG00000015016	FALSE	FALSE	FALSE	TRUE
ENSDARG00000112633	FALSE	FALSE	FALSE	FALSE
ENSDARG00000091419	FALSE	TRUE	FALSE	FALSE
ENSDARG00000006719	FALSE	FALSE	FALSE	FALSE
ENSDARG00000102499	FALSE	FALSE	FALSE	FALSE
ENSDARG00000076139	FALSE	FALSE	FALSE	FALSE
ENSDARG00000078748	FALSE	FALSE	FALSE	FALSE
ENSDARG00000074985	FALSE	FALSE	FALSE	TRUE
ENSDARG00000091059	FALSE	FALSE	FALSE	FALSE
ENSDARG00000025350	FALSE	FALSE	FALSE	FALSE
ENSDARG00000086288	FALSE	FALSE	FALSE	TRUE
ENSDARG00000013245	FALSE	FALSE	FALSE	FALSE
ENSDARG00000117360	FALSE	FALSE	FALSE	FALSE
ENSDARG00000055477	FALSE	FALSE	FALSE	TRUE
ENSDARG00000042659	FALSE	FALSE	FALSE	FALSE
ENSDARG00000059712	FALSE	FALSE	FALSE	FALSE
ENSDARG00000076718	FALSE	FALSE	FALSE	FALSE
ENSDARG00000034600	FALSE	FALSE	FALSE	FALSE
ENSDARG00000004392	FALSE	FALSE	FALSE	FALSE
ENSDARG00000071774	FALSE	FALSE	FALSE	FALSE
ENSDARG00000100918	FALSE	FALSE	FALSE	FALSE
ENSDARG00000102850	FALSE	FALSE	FALSE	FALSE
ENSDARG00000073756	FALSE	FALSE	FALSE	FALSE
ENSDARG00000044281	FALSE	FALSE	FALSE	FALSE
ENSDARG00000076650	FALSE	FALSE	FALSE	FALSE
ENSDARG00000018559	FALSE	FALSE	FALSE	TRUE
ENSDARG00000100227	FALSE	FALSE	FALSE	FALSE
ENSDARG00000103144	FALSE	FALSE	FALSE	FALSE
ENSDARG00000093393	FALSE	FALSE	FALSE	FALSE
ENSDARG00000007566	FALSE	FALSE	FALSE	FALSE
ENSDARG00000069888	FALSE	FALSE	FALSE	FALSE
ENSDARG00000056914	FALSE	FALSE	FALSE	TRUE
ENSDARG00000069669	FALSE	FALSE	FALSE	FALSE
ENSDARG00000071673	FALSE	FALSE	FALSE	FALSE
ENSDARG00000044513	FALSE	FALSE	FALSE	FALSE
ENSDARG00000042147	FALSE	FALSE	FALSE	TRUE
ENSDARG00000105031	FALSE	FALSE	FALSE	FALSE
ENSDARG00000022569	FALSE	FALSE	FALSE	FALSE
ENSDARG00000020834	FALSE	TRUE	FALSE	FALSE
ENSDARG00000098766	FALSE	FALSE	FALSE	FALSE
ENSDARG00000101320	FALSE	FALSE	FALSE	FALSE
ENSDARG00000003769	FALSE	FALSE	FALSE	FALSE
ENSDARG00000059809	FALSE	FALSE	FALSE	FALSE
ENSDARG00000036194	FALSE	FALSE	FALSE	FALSE
ENSDARG00000099958	FALSE	FALSE	FALSE	FALSE
ENSDARG00000078754	FALSE	FALSE	FALSE	FALSE
ENSDARG00000093778	FALSE	FALSE	FALSE	FALSE
ENSDARG00000043902	FALSE	FALSE	FALSE	FALSE
ENSDARG00000062305	FALSE	FALSE	FALSE	FALSE
ENSDARG00000092787	FALSE	FALSE	FALSE	FALSE
ENSDARG00000096375	FALSE	FALSE	FALSE	FALSE
ENSDARG00000078087	FALSE	FALSE	FALSE	FALSE
ENSDARG00000027657	FALSE	FALSE	FALSE	FALSE
ENSDARG00000054271	FALSE	FALSE	FALSE	FALSE
ENSDARG00000061560	FALSE	FALSE	FALSE	FALSE
ENSDARG00000006225	FALSE	FALSE	FALSE	TRUE
ENSDARG00000028086	FALSE	FALSE	FALSE	FALSE
ENSDARG00000001889	FALSE	FALSE	FALSE	TRUE
ENSDARG00000097908	FALSE	FALSE	FALSE	FALSE
ENSDARG00000079455	FALSE	FALSE	FALSE	FALSE
ENSDARG00000103313	FALSE	FALSE	FALSE	FALSE
ENSDARG00000036215	FALSE	FALSE	FALSE	FALSE
ENSDARG00000055370	FALSE	FALSE	FALSE	TRUE
ENSDARG00000003829	FALSE	FALSE	FALSE	FALSE
ENSDARG00000112131	FALSE	FALSE	FALSE	FALSE
ENSDARG00000038030	FALSE	FALSE	FALSE	FALSE
ENSDARG00000116155	FALSE	FALSE	FALSE	FALSE
ENSDARG00000007329	FALSE	FALSE	TRUE	TRUE
ENSDARG00000037961	FALSE	FALSE	FALSE	FALSE
ENSDARG00000086712	FALSE	FALSE	FALSE	FALSE
ENSDARG00000062549	FALSE	FALSE	FALSE	FALSE
ENSDARG00000004647	FALSE	FALSE	FALSE	FALSE
ENSDARG00000068227	FALSE	FALSE	FALSE	FALSE
ENSDARG00000089467	FALSE	FALSE	FALSE	FALSE
ENSDARG00000077549	FALSE	FALSE	FALSE	FALSE
ENSDARG00000116148	FALSE	FALSE	FALSE	FALSE
ENSDARG00000056679	FALSE	FALSE	FALSE	FALSE
ENSDARG00000068122	FALSE	FALSE	FALSE	FALSE
ENSDARG00000110920	FALSE	FALSE	FALSE	FALSE
ENSDARG00000057918	FALSE	FALSE	FALSE	FALSE
ENSDARG00000055470	FALSE	FALSE	FALSE	TRUE
ENSDARG00000053876	FALSE	FALSE	FALSE	FALSE
ENSDARG00000039929	FALSE	FALSE	FALSE	FALSE
ENSDARG00000002249	FALSE	FALSE	FALSE	FALSE
ENSDARG00000051886	FALSE	FALSE	FALSE	FALSE
ENSDARG00000094952	FALSE	FALSE	FALSE	FALSE
ENSDARG00000031632	FALSE	FALSE	FALSE	FALSE
ENSDARG00000086892	FALSE	FALSE	FALSE	FALSE
ENSDARG00000090255	FALSE	FALSE	FALSE	FALSE
ENSDARG00000025904	FALSE	FALSE	FALSE	FALSE
ENSDARG00000038348	FALSE	FALSE	FALSE	FALSE
ENSDARG00000036820	FALSE	FALSE	FALSE	TRUE
ENSDARG00000079306	FALSE	FALSE	FALSE	FALSE
ENSDARG00000017522	FALSE	FALSE	FALSE	FALSE
ENSDARG00000026784	FALSE	FALSE	FALSE	FALSE
ENSDARG00000062101	FALSE	FALSE	FALSE	FALSE
ENSDARG00000052851	FALSE	FALSE	FALSE	TRUE
ENSDARG00000116390	FALSE	FALSE	FALSE	FALSE
ENSDARG00000069708	FALSE	FALSE	FALSE	FALSE
ENSDARG00000038094	FALSE	FALSE	FALSE	FALSE
ENSDARG00000020235	FALSE	FALSE	FALSE	FALSE
ENSDARG00000105434	FALSE	FALSE	FALSE	FALSE
ENSDARG00000079403	FALSE	FALSE	FALSE	FALSE
ENSDARG00000069823	FALSE	FALSE	FALSE	FALSE
ENSDARG00000029479	FALSE	FALSE	FALSE	FALSE
ENSDARG00000045296	FALSE	FALSE	FALSE	TRUE
ENSDARG00000103730	FALSE	FALSE	FALSE	FALSE
ENSDARG00000056648	FALSE	FALSE	FALSE	FALSE
ENSDARG00000098197	FALSE	FALSE	FALSE	FALSE
ENSDARG00000111474	FALSE	FALSE	FALSE	FALSE
ENSDARG00000110153	FALSE	FALSE	FALSE	FALSE
ENSDARG00000105335	FALSE	FALSE	FALSE	FALSE
ENSDARG00000089681	FALSE	FALSE	FALSE	FALSE
ENSDARG00000074697	FALSE	FALSE	FALSE	FALSE
ENSDARG00000092179	FALSE	FALSE	FALSE	FALSE
ENSDARG00000055530	FALSE	FALSE	FALSE	TRUE
ENSDARG00000014180	FALSE	FALSE	FALSE	FALSE
ENSDARG00000078172	FALSE	FALSE	FALSE	FALSE
ENSDARG00000070954	FALSE	FALSE	FALSE	FALSE
ENSDARG00000074490	FALSE	FALSE	FALSE	FALSE
ENSDARG00000004635	FALSE	FALSE	FALSE	FALSE
ENSDARG00000021697	FALSE	FALSE	FALSE	FALSE
ENSDARG00000093145	FALSE	FALSE	FALSE	FALSE
ENSDARG00000101102	FALSE	FALSE	FALSE	FALSE
ENSDARG00000015355	FALSE	FALSE	FALSE	FALSE
ENSDARG00000060071	FALSE	FALSE	FALSE	FALSE
ENSDARG00000090830	FALSE	FALSE	FALSE	FALSE
ENSDARG00000018328	FALSE	FALSE	FALSE	TRUE
ENSDARG00000039997	FALSE	FALSE	FALSE	FALSE
ENSDARG00000012672	FALSE	FALSE	FALSE	FALSE
ENSDARG00000079847	FALSE	FALSE	FALSE	FALSE
ENSDARG00000021869	FALSE	FALSE	FALSE	FALSE
ENSDARG00000036299	FALSE	FALSE	FALSE	FALSE
ENSDARG00000107678	FALSE	FALSE	FALSE	FALSE
ENSDARG00000016058	FALSE	FALSE	FALSE	FALSE
ENSDARG00000036107	FALSE	FALSE	FALSE	FALSE
ENSDARG00000043797	FALSE	FALSE	FALSE	FALSE
ENSDARG00000102167	FALSE	FALSE	FALSE	FALSE
ENSDARG00000094318	FALSE	FALSE	FALSE	FALSE
ENSDARG00000067713	FALSE	FALSE	FALSE	FALSE
ENSDARG00000104883	FALSE	FALSE	FALSE	FALSE
ENSDARG00000035872	FALSE	FALSE	FALSE	FALSE
ENSDARG00000045595	FALSE	FALSE	FALSE	FALSE
ENSDARG00000078604	FALSE	FALSE	FALSE	FALSE
ENSDARG00000082216	FALSE	FALSE	FALSE	FALSE
ENSDARG00000055099	FALSE	FALSE	FALSE	FALSE
ENSDARG00000100339	FALSE	FALSE	FALSE	FALSE
ENSDARG00000035390	FALSE	FALSE	FALSE	FALSE
ENSDARG00000089538	FALSE	FALSE	FALSE	FALSE
ENSDARG00000020699	FALSE	FALSE	FALSE	FALSE
ENSDARG00000101210	FALSE	FALSE	FALSE	FALSE
ENSDARG00000092341	FALSE	FALSE	FALSE	FALSE
ENSDARG00000037192	FALSE	FALSE	FALSE	FALSE
ENSDARG00000076533	FALSE	FALSE	FALSE	FALSE
ENSDARG00000008407	FALSE	FALSE	FALSE	FALSE
ENSDARG00000079784	FALSE	FALSE	FALSE	FALSE
ENSDARG00000110582	FALSE	FALSE	FALSE	FALSE
ENSDARG00000105967	FALSE	FALSE	FALSE	FALSE
ENSDARG00000102076	FALSE	FALSE	FALSE	FALSE
ENSDARG00000078066	FALSE	FALSE	FALSE	FALSE
ENSDARG00000002305	FALSE	FALSE	FALSE	FALSE
ENSDARG00000092454	FALSE	FALSE	FALSE	FALSE
ENSDARG00000088630	FALSE	FALSE	FALSE	FALSE
ENSDARG00000028106	FALSE	FALSE	FALSE	FALSE
ENSDARG00000086236	FALSE	FALSE	FALSE	FALSE
ENSDARG00000021805	FALSE	FALSE	FALSE	FALSE
ENSDARG00000043130	FALSE	FALSE	FALSE	FALSE
ENSDARG00000070151	FALSE	FALSE	FALSE	FALSE
ENSDARG00000019364	FALSE	FALSE	FALSE	FALSE
ENSDARG00000020981	FALSE	FALSE	FALSE	FALSE
ENSDARG00000020606	FALSE	TRUE	FALSE	FALSE
ENSDARG00000008377	FALSE	FALSE	FALSE	TRUE
ENSDARG00000034043	FALSE	FALSE	FALSE	FALSE
ENSDARG00000113707	FALSE	FALSE	FALSE	FALSE
ENSDARG00000014796	FALSE	FALSE	FALSE	FALSE
ENSDARG00000103511	FALSE	FALSE	FALSE	FALSE
ENSDARG00000074691	FALSE	FALSE	FALSE	FALSE
ENSDARG00000117727	FALSE	FALSE	FALSE	FALSE
ENSDARG00000002339	FALSE	FALSE	FALSE	FALSE
ENSDARG00000086183	FALSE	FALSE	FALSE	FALSE
ENSDARG00000035056	FALSE	FALSE	FALSE	FALSE
ENSDARG00000076602	FALSE	FALSE	FALSE	FALSE
ENSDARG00000103358	FALSE	FALSE	FALSE	FALSE
ENSDARG00000097630	FALSE	FALSE	FALSE	FALSE
ENSDARG00000112572	FALSE	FALSE	FALSE	FALSE
ENSDARG00000021547	FALSE	FALSE	FALSE	FALSE
ENSDARG00000105468	FALSE	FALSE	FALSE	FALSE
ENSDARG00000080009	FALSE	FALSE	FALSE	FALSE
ENSDARG00000060316	FALSE	FALSE	FALSE	FALSE
ENSDARG00000103135	FALSE	FALSE	FALSE	FALSE
ENSDARG00000059858	FALSE	FALSE	FALSE	FALSE
ENSDARG00000061011	FALSE	FALSE	FALSE	FALSE
ENSDARG00000006215	FALSE	FALSE	FALSE	FALSE
ENSDARG00000039070	FALSE	FALSE	FALSE	TRUE
ENSDARG00000032795	FALSE	FALSE	FALSE	FALSE
ENSDARG00000091879	FALSE	FALSE	FALSE	FALSE
ENSDARG00000095064	FALSE	FALSE	FALSE	FALSE
ENSDARG00000038577	FALSE	FALSE	FALSE	FALSE
ENSDARG00000054941	FALSE	FALSE	FALSE	FALSE
ENSDARG00000082215	FALSE	FALSE	FALSE	FALSE
ENSDARG00000051876	FALSE	FALSE	FALSE	FALSE
ENSDARG00000099044	FALSE	FALSE	FALSE	FALSE
ENSDARG00000113021	FALSE	FALSE	FALSE	FALSE
ENSDARG00000037057	FALSE	FALSE	FALSE	FALSE
ENSDARG00000091637	FALSE	FALSE	FALSE	FALSE
ENSDARG00000107445	FALSE	FALSE	FALSE	FALSE
ENSDARG00000078691	FALSE	FALSE	FALSE	TRUE
ENSDARG00000115071	FALSE	FALSE	FALSE	FALSE
ENSDARG00000004745	FALSE	FALSE	FALSE	TRUE
ENSDARG00000083784	FALSE	FALSE	FALSE	FALSE
ENSDARG00000080938	FALSE	FALSE	FALSE	FALSE
ENSDARG00000096229	FALSE	FALSE	FALSE	FALSE
ENSDARG00000028389	FALSE	FALSE	FALSE	FALSE
ENSDARG00000063614	FALSE	FALSE	FALSE	FALSE
ENSDARG00000075730	FALSE	FALSE	FALSE	FALSE
ENSDARG00000003144	FALSE	FALSE	FALSE	FALSE
ENSDARG00000060926	FALSE	FALSE	FALSE	FALSE
ENSDARG00000003398	FALSE	FALSE	FALSE	FALSE
ENSDARG00000061256	FALSE	FALSE	FALSE	FALSE
ENSDARG00000079148	FALSE	FALSE	FALSE	TRUE
ENSDARG00000094265	FALSE	FALSE	FALSE	FALSE
ENSDARG00000054007	FALSE	FALSE	FALSE	FALSE
ENSDARG00000007449	FALSE	FALSE	FALSE	FALSE
ENSDARG00000086775	FALSE	FALSE	FALSE	FALSE
ENSDARG00000099821	FALSE	FALSE	FALSE	FALSE
ENSDARG00000070809	FALSE	FALSE	FALSE	FALSE
ENSDARG00000020136	FALSE	FALSE	FALSE	FALSE
ENSDARG00000070475	TRUE	TRUE	FALSE	TRUE
ENSDARG00000011317	FALSE	FALSE	FALSE	FALSE
ENSDARG00000071051	FALSE	FALSE	FALSE	FALSE
ENSDARG00000074319	FALSE	FALSE	FALSE	TRUE
ENSDARG00000102162	FALSE	FALSE	FALSE	FALSE
ENSDARG00000114038	FALSE	FALSE	FALSE	FALSE
ENSDARG00000103700	FALSE	FALSE	FALSE	FALSE
ENSDARG00000019299	FALSE	FALSE	FALSE	FALSE
ENSDARG00000070432	FALSE	FALSE	FALSE	TRUE
ENSDARG00000100384	FALSE	FALSE	FALSE	FALSE
ENSDARG00000100815	FALSE	FALSE	FALSE	FALSE
ENSDARG00000037836	FALSE	FALSE	FALSE	FALSE
ENSDARG00000096646	FALSE	FALSE	FALSE	FALSE
ENSDARG00000016177	FALSE	FALSE	FALSE	FALSE
ENSDARG00000095610	FALSE	FALSE	FALSE	FALSE
ENSDARG00000076020	FALSE	FALSE	FALSE	FALSE
ENSDARG00000105362	FALSE	FALSE	FALSE	FALSE
ENSDARG00000104945	FALSE	FALSE	FALSE	FALSE
ENSDARG00000015681	FALSE	FALSE	FALSE	FALSE
ENSDARG00000070478	FALSE	FALSE	FALSE	FALSE
ENSDARG00000054312	FALSE	FALSE	FALSE	FALSE
ENSDARG00000032261	FALSE	FALSE	FALSE	FALSE
ENSDARG00000012072	FALSE	FALSE	FALSE	FALSE
ENSDARG00000055676	FALSE	FALSE	FALSE	FALSE
ENSDARG00000033599	FALSE	FALSE	FALSE	FALSE
ENSDARG00000078311	FALSE	FALSE	FALSE	FALSE
ENSDARG00000099944	FALSE	FALSE	FALSE	FALSE
ENSDARG00000028386	FALSE	FALSE	FALSE	FALSE
ENSDARG00000045105	FALSE	FALSE	FALSE	TRUE
ENSDARG00000075561	FALSE	FALSE	FALSE	FALSE
ENSDARG00000077790	FALSE	FALSE	FALSE	FALSE
ENSDARG00000071250	FALSE	FALSE	FALSE	FALSE
ENSDARG00000029931	FALSE	FALSE	FALSE	FALSE
ENSDARG00000103404	FALSE	FALSE	FALSE	FALSE
ENSDARG00000042667	TRUE	TRUE	FALSE	FALSE
ENSDARG00000008904	FALSE	FALSE	FALSE	FALSE
ENSDARG00000027940	FALSE	FALSE	FALSE	FALSE
ENSDARG00000029353	FALSE	FALSE	FALSE	FALSE
ENSDARG00000100958	FALSE	FALSE	FALSE	FALSE
ENSDARG00000100396	FALSE	FALSE	FALSE	FALSE
ENSDARG00000060256	FALSE	FALSE	FALSE	FALSE
ENSDARG00000117785	FALSE	FALSE	FALSE	FALSE
ENSDARG00000042057	FALSE	FALSE	FALSE	TRUE
ENSDARG00000101915	FALSE	FALSE	FALSE	FALSE
ENSDARG00000053404	FALSE	FALSE	FALSE	FALSE
ENSDARG00000101818	FALSE	FALSE	FALSE	FALSE
ENSDARG00000077116	FALSE	FALSE	FALSE	TRUE
ENSDARG00000110020	FALSE	FALSE	FALSE	FALSE
ENSDARG00000080423	FALSE	FALSE	FALSE	FALSE
ENSDARG00000113550	FALSE	FALSE	FALSE	FALSE
ENSDARG00000011301	FALSE	FALSE	FALSE	FALSE
ENSDARG00000115869	FALSE	FALSE	FALSE	FALSE
ENSDARG00000087536	FALSE	FALSE	FALSE	FALSE
ENSDARG00000096950	FALSE	FALSE	FALSE	FALSE
ENSDARG00000036008	FALSE	FALSE	FALSE	FALSE
ENSDARG00000012581	FALSE	FALSE	FALSE	FALSE
ENSDARG00000077407	FALSE	FALSE	FALSE	FALSE
ENSDARG00000035970	FALSE	FALSE	FALSE	FALSE
ENSDARG00000068967	FALSE	FALSE	FALSE	FALSE
ENSDARG00000038954	FALSE	FALSE	FALSE	TRUE
ENSDARG00000036070	FALSE	FALSE	FALSE	TRUE
ENSDARG00000037362	FALSE	FALSE	FALSE	FALSE
ENSDARG00000040184	FALSE	FALSE	FALSE	FALSE
ENSDARG00000018787	FALSE	TRUE	FALSE	FALSE
ENSDARG00000055124	FALSE	FALSE	FALSE	TRUE
ENSDARG00000077656	FALSE	FALSE	FALSE	FALSE
ENSDARG00000105328	FALSE	FALSE	FALSE	FALSE
ENSDARG00000057477	FALSE	FALSE	FALSE	FALSE
ENSDARG00000113923	FALSE	FALSE	FALSE	FALSE
ENSDARG00000075673	FALSE	FALSE	FALSE	TRUE
ENSDARG00000040251	FALSE	FALSE	FALSE	TRUE
ENSDARG00000076176	FALSE	FALSE	FALSE	FALSE
ENSDARG00000076721	FALSE	FALSE	FALSE	FALSE
ENSDARG00000092042	FALSE	FALSE	FALSE	FALSE
ENSDARG00000003854	FALSE	FALSE	FALSE	FALSE
ENSDARG00000117730	FALSE	FALSE	FALSE	FALSE
ENSDARG00000037943	FALSE	FALSE	FALSE	FALSE
ENSDARG00000045675	FALSE	FALSE	FALSE	FALSE
ENSDARG00000030448	FALSE	FALSE	FALSE	FALSE
ENSDARG00000100060	FALSE	FALSE	FALSE	FALSE
ENSDARG00000097428	FALSE	FALSE	FALSE	FALSE
ENSDARG00000099158	FALSE	FALSE	FALSE	FALSE
ENSDARG00000073859	FALSE	FALSE	FALSE	FALSE
ENSDARG00000110872	FALSE	FALSE	FALSE	FALSE
ENSDARG00000053979	FALSE	FALSE	FALSE	FALSE
ENSDARG00000058342	FALSE	FALSE	FALSE	TRUE
ENSDARG00000112858	FALSE	FALSE	FALSE	FALSE
ENSDARG00000054304	FALSE	FALSE	FALSE	FALSE
ENSDARG00000103032	FALSE	FALSE	FALSE	FALSE
ENSDARG00000018342	FALSE	FALSE	FALSE	FALSE
ENSDARG00000056250	FALSE	FALSE	FALSE	TRUE
ENSDARG00000097909	FALSE	FALSE	FALSE	FALSE
ENSDARG00000103508	FALSE	FALSE	FALSE	FALSE
ENSDARG00000103380	FALSE	FALSE	FALSE	FALSE
ENSDARG00000089920	FALSE	FALSE	FALSE	FALSE
ENSDARG00000012577	FALSE	FALSE	FALSE	FALSE
ENSDARG00000030999	FALSE	FALSE	FALSE	FALSE
ENSDARG00000105295	FALSE	FALSE	FALSE	FALSE
ENSDARG00000062991	FALSE	FALSE	FALSE	TRUE
[truncated: 2,048 more rows]
