# Supplementary material for: Antibody-free profiling of transcription factor occupancy during early embryogenesis by FitCUT&RUN
Source: HighWire-hosted journal article supplement (doi:10.1101/gr.275837.121), 2021-12-29
Supplement: Supplemental_Table_S6.xlsx [file Supplemental_Table_S6.xlsx]

## Sheet: Sheet1
Supplemental Table S6. Sequence of CRISPR targets and RT-qPCR primers.
Name	Sequence (5' to 3')
gRNA (peak near hist1h4l)	GGATAATGGTGCACTTAA
gRNA (peak near dharma)	TCTACAAAGAGGTGTTAA
gRNA (peak 1 near foxa3)	CTCCATTCATTAGCCATT
gRNA (peak 2 near foxa3)	CTTAATGGGTGACGCTAA
gRNA (peak near fgfr4)	AAGCCCCTTATTATGCTAA
hist1h4l primer-F	CAACATCCAAGGCATTACAA
hist1h4l primer-R	CATAGCGGTCACAGTCTT
dharma primer-F	CAGCACTGATGGTGAACT
dharma primer-R	TGAGCGATTGTGTGGTAG
foxa3 primer-F	GCTCCGTGAAGATGGAAT
foxa3 primer-R	GCCGAGTTGAGATTTATGTAG
fgfr4 primer-F	GAGTGTGGTTCCCTCAGACC
fgfr4 primer-R	ACACAGGAACTGGGCATCTC
actb1 primer-F	TGAGGAAATCGCTGCCCTG
actb1 primer-R	AGGAGTCTTTCTGTCCCATGC
