# Supplementary material for: Antibody-free profiling of transcription factor occupancy during early embryogenesis by FitCUT&RUN
Source: HighWire-hosted journal article supplement (doi:10.1101/gr.275837.121), 2021-12-29
Supplement: Supplemental_Table_S7.xlsx [file Supplemental_Table_S7.xlsx]

## Sheet: danRer11_2.ensGene
Supplemental Table S7. Ensembl transcript/gene annotation for danRer11 with new Chromosome 4 assembly.
Ensembl_transcript_id	Chromosome	Strand	Transcription start position	Transcription end position	Coding region start	Coding region end	Number of exons	Exon start positions	Exon end positions	Score	Ensembl_gene_id	Status of CDS start annotation (none, unknown, incomplete, or complete)	Status of CDS end annotation (none, unknown, incomplete, or complete)	Exon frame offsets {0,1,2}
ENSDART00000164359.1	chr1	-	6407	12027	6679	11755	6	6407,6891,9557,10080,11549,11750,	6760,6955,9694,10191,11625,12027,	0	ENSDARG00000099104.1	cmpl	cmpl	0,2,0,0,2,0,
ENSDART00000158290.1	chr1	-	6641	7335	7335	7335	2	6641,6891,	6760,7335,	0	ENSDARG00000099104.1	none	none	-1,-1,
ENSDART00000157701.1	chr1	-	6641	9919	9919	9919	3	6641,6891,9557,	6760,6955,9919,	0	ENSDARG00000099104.1	none	none	-1,-1,-1,
ENSDART00000167898.1	chr1	-	6643	11725	11725	11725	5	6643,6891,9557,10080,11549,	6760,6955,9694,10191,11725,	0	ENSDARG00000099104.1	none	none	-1,-1,-1,-1,-1,
ENSDART00000166393.1	chr1	+	11821	16373	11997	15963	11	11821,12372,12794,13033,13218,13503,14031,14289,14698,15351,15675,	12034,12521,12953,13135,13332,13667,14190,14402,15137,15427,16373,	0	ENSDARG00000102407.2	cmpl	cmpl	0,1,0,0,0,0,2,2,1,2,0,
ENSDART00000161842.1	chr1	+	11991	14058	11991	14058	7	11991,12372,12794,13069,13218,13503,14031,	12034,12521,12953,13135,13332,13667,14058,	0	ENSDARG00000102407.2	incmpl	incmpl	0,1,0,0,0,0,2,
ENSDART00000170877.1	chr1	+	12128	13257	13257	13257	5	12128,12372,12794,13033,13218,	12269,12521,12953,13135,13257,	0	ENSDARG00000102407.2	none	none	-1,-1,-1,-1,-1,
ENSDART00000165461.1	chr1	+	14166	14809	14809	14809	2	14166,14698,	14402,14809,	0	ENSDARG00000102407.2	none	none	-1,-1,
ENSDART00000171631.1	chr1	+	14342	15063	15063	15063	2	14342,14698,	14432,15063,	0	ENSDARG00000102407.2	none	none	-1,-1,
ENSDART00000169005.1	chr1	+	15061	16272	15061	15410	3	15061,15364,15675,	15137,15427,16272,	0	ENSDARG00000102407.2	incmpl	cmpl	1,2,-1,
ENSDART00000172454.1	chr1	+	18715	23389	18715	23112	12	18715,19484,19672,19805,20024,20419,20659,22225,22364,22613,22798,23067,	18912,19582,19712,19888,20329,20525,20806,22289,22522,22724,22966,23389,	0	ENSDARG00000102097.2	incmpl	cmpl	2,1,0,1,0,2,0,0,1,0,0,0,
ENSDART00000168451.1	chr1	+	18715	19963	19963	19963	4	18715,19484,19672,19805,	18912,19582,19712,19963,	0	ENSDARG00000102097.2	none	none	-1,-1,-1,-1,
ENSDART00000172487.1	chr1	+	18746	20331	20331	20331	4	18746,19484,19672,20024,	18912,19582,19888,20331,	0	ENSDARG00000102097.2	none	none	-1,-1,-1,-1,
ENSDART00000161190.1	chr1	+	18785	23173	18785	23090	12	18785,19484,19672,19805,20024,20419,20659,22225,22364,22613,22806,23067,	18912,19582,19712,19888,20329,20525,20806,22289,22522,22724,22966,23173,	0	ENSDARG00000102097.2	incmpl	cmpl	0,1,0,1,0,2,0,0,1,0,0,1,
ENSDART00000161139.1	chr1	+	25584	27255	25714	27061	1	25584,	27255,	0	ENSDARG00000099319.1	incmpl	incmpl	0,
ENSDART00000162928.1	chr1	+	27689	34330	27835	34247	12	27689,29800,30079,31228,31399,31658,31813,32109,32377,32982,33505,34120,	27955,29953,30172,31294,31525,31740,31905,32243,32483,33141,33579,34330,	0	ENSDARG00000099640.1	cmpl	cmpl	0,0,0,0,0,0,1,0,2,0,0,2,
ENSDART00000166052.1	chr1	+	27813	31905	31905	31905	6	27813,29800,30079,31228,31399,31658,	27955,29953,30172,31294,31525,31905,	0	ENSDARG00000099640.1	none	none	-1,-1,-1,-1,-1,-1,
ENSDART00000161955.1	chr1	+	27848	31321	31321	31321	4	27848,29800,30079,31228,	27955,29953,30172,31321,	0	ENSDARG00000099640.1	none	none	-1,-1,-1,-1,
ENSDART00000163891.1	chr1	+	31786	32353	32353	32353	2	31786,32109,	31905,32353,	0	ENSDARG00000099640.1	none	none	-1,-1,
ENSDART00000169685.1	chr1	+	36551	39191	36848	39035	5	36551,37983,38492,38757,38980,	36878,38221,38644,38876,39191,	0	ENSDARG00000104071.1	cmpl	cmpl	0,0,1,0,2,
ENSDART00000166557.1	chr1	+	36726	38446	38446	38446	2	36726,37983,	36878,38446,	0	ENSDARG00000104071.1	none	none	-1,-1,
ENSDART00000171547.1	chr1	-	39312	44484	39821	43400	7	39312,40318,40796,42214,42478,43287,44331,	40061,40439,40837,42256,42701,43430,44484,	0	ENSDARG00000102746.2	cmpl	cmpl	0,2,0,0,2,0,-1,
ENSDART00000168091.1	chr1	-	39324	44565	39821	43400	9	39324,40318,40796,41250,41933,42172,42478,43287,44331,	40061,40439,40984,41572,42088,42256,42701,43430,44565,	0	ENSDARG00000102746.2	cmpl	cmpl	0,2,0,2,0,0,2,0,-1,
ENSDART00000164075.1	chr1	-	41332	44534	41332	44348	5	41332,41933,42172,42478,44331,	41572,42088,42256,42701,44534,	0	ENSDARG00000102746.2	incmpl	cmpl	2,0,0,2,0,
ENSDART00000170183.1	chr1	-	42039	42838	42838	42838	3	42039,42172,42478,	42088,42256,42838,	0	ENSDARG00000102746.2	none	none	-1,-1,-1,
ENSDART00000165693.1	chr1	-	42203	44546	42243	43400	3	42203,43287,44331,	42256,43430,44546,	0	ENSDARG00000102746.2	cmpl	cmpl	2,0,-1,
ENSDART00000160050.1	chr1	-	42479	44314	42479	43400	3	42479,43287,44158,	42701,43430,44314,	0	ENSDARG00000102746.2	incmpl	cmpl	2,0,-1,
ENSDART00000169744.1	chr1	-	42838	44546	44546	44546	2	42838,44331,	43430,44546,	0	ENSDARG00000102746.2	none	none	-1,-1,
ENSDART00000168660.1	chr1	-	43384	43782	43384	43644	2	43384,43632,	43430,43782,	0	ENSDARG00000102746.2	incmpl	cmpl	0,0,
ENSDART00000168428.1	chr1	-	44838	50247	45511	49692	8	44838,45787,47420,47660,47952,48434,48889,49637,	45550,46371,47549,47807,48072,48584,49060,50247,	0	ENSDARG00000103929.1	cmpl	cmpl	0,1,1,1,1,1,1,0,
ENSDART00000171162.1	chr1	-	46036	48933	46036	48933	6	46036,47420,47660,47952,48434,48889,	46371,47549,47807,48072,48576,48933,	0	ENSDARG00000103929.1	incmpl	incmpl	1,1,1,1,0,1,
ENSDART00000164034.1	chr1	-	47419	48077	48077	48077	3	47419,47660,47952,	47549,47807,48077,	0	ENSDARG00000103929.1	none	none	-1,-1,-1,
ENSDART00000166228.1	chr1	-	47819	49695	49695	49695	4	47819,48434,48889,49637,	48072,48584,49060,49695,	0	ENSDARG00000103929.1	none	none	-1,-1,-1,-1,
ENSDART00000161565.1	chr1	-	47953	49835	48541	49692	4	47953,48434,48889,49637,	48072,48564,49060,49835,	0	ENSDARG00000103929.1	cmpl	cmpl	-1,1,1,0,
ENSDART00000161352.1	chr1	-	48876	49842	49842	49842	2	48876,49637,	49060,49842,	0	ENSDARG00000103929.1	none	none	-1,-1,
ENSDART00000180269.1	chr1	-	60978	64829	60978	64829	3	60978,62716,64756,	61106,63052,64829,	0	ENSDARG00000101073.2	cmpl	cmpl	1,1,0,
ENSDART00000168609.1	chr1	-	60986	65017	60986	64856	3	60986,62716,64756,	61106,63064,65017,	0	ENSDARG00000101073.2	incmpl	cmpl	1,1,0,
ENSDART00000164282.1	chr1	-	65704	71494	71494	71494	5	65704,67620,67833,68048,71432,	67548,67753,67950,69440,71494,	0	ENSDARG00000100223.2	none	none	-1,-1,-1,-1,-1,
ENSDART00000165650.2	chr1	-	65704	71523	67043	71475	7	65704,67620,67833,68048,68861,69270,71432,	67548,67753,67950,68213,69075,69443,71523,	0	ENSDARG00000100223.2	cmpl	cmpl	2,1,1,1,0,1,0,
ENSDART00000165267.1	chr1	-	65704	71523	67043	71523	7	65704,67620,67833,68048,68861,69270,71432,	67548,67753,67950,68213,69075,69440,71523,	0	ENSDARG00000100223.2	cmpl	incmpl	2,1,1,1,0,1,0,
ENSDART00000166954.1	chr1	-	66282	69444	67043	69273	6	66282,67620,67833,68048,68861,69270,	67548,67753,67950,68213,69075,69444,	0	ENSDARG00000100223.2	cmpl	cmpl	2,1,1,1,0,0,
ENSDART00000171963.1	chr1	-	67886	71470	67886	69581	6	67886,68048,68861,69270,69565,71432,	67950,68213,69075,69440,69801,71470,	0	ENSDARG00000100223.2	incmpl	cmpl	1,1,0,1,0,-1,
ENSDART00000167148.1	chr1	-	67889	71472	71472	71472	4	67889,68861,69270,71432,	68213,69075,69443,71472,	0	ENSDARG00000100223.2	none	none	-1,-1,-1,-1,
ENSDART00000152494.1	chr1	-	108284	110804	110804	110804	2	108284,110576,	108338,110804,	0	ENSDARG00000096573.1	none	none	-1,-1,
ENSDART00000165402.1	chr1	+	109797	119146	109843	117618	8	109797,110643,111175,111530,112244,115047,115237,117070,	109928,110807,111200,111644,112391,115139,115358,119146,	0	ENSDARG00000100782.2	cmpl	cmpl	0,1,0,1,1,1,0,1,
ENSDART00000013209.7	chr1	+	119959	125246	119975	124755	8	119959,120112,120863,120961,121701,122110,122328,124204,	120036,120276,120888,121078,121842,122232,122449,125246,	0	ENSDARG00000034862.5	cmpl	cmpl	0,1,0,1,1,1,0,1,
ENSDART00000003463.8	chr1	+	127249	134079	127263	133723	8	127249,128804,129072,130897,131178,131859,132323,133112,	127324,128968,129097,131011,131316,131957,132444,134079,	0	ENSDARG00000075827.6	cmpl	cmpl	0,1,0,1,1,1,0,1,
ENSDART00000152301.2	chr1	+	127265	133215	133215	133215	8	127265,128804,129072,130897,131178,131859,132323,133112,	127324,128968,129182,131011,131316,131957,132444,133215,	0	ENSDARG00000075827.6	none	none	-1,-1,-1,-1,-1,-1,-1,-1,
ENSDART00000152530.1	chr1	+	127299	129591	129591	129591	3	127299,128804,129072,	127324,128968,129591,	0	ENSDARG00000075827.6	none	none	-1,-1,-1,
ENSDART00000152248.1	chr1	+	130626	131221	131221	131221	2	130626,131178,	131011,131221,	0	ENSDARG00000075827.6	none	none	-1,-1,
ENSDART00000124837.3	chr1	+	135902	142469	136086	141441	8	135902,136305,137424,137673,139221,139485,140308,140821,	136147,136466,137449,137787,139353,139769,140426,142469,	0	ENSDARG00000088581.4	cmpl	cmpl	0,1,0,1,1,1,0,1,
ENSDART00000064061.4	chr1	+	144283	151998	144301	151685	8	144283,144921,148137,148392,148586,150715,150869,151191,	144377,145085,148162,148506,148718,150780,150987,151998,	0	ENSDARG00000076900.2	cmpl	cmpl	0,1,0,1,1,1,0,1,
ENSDART00000018741.9	chr1	-	152006	157563	152315	156375	15	152006,152662,152865,153153,153451,153771,154085,154355,154605,154760,154900,155881,156159,156339,157473,	152405,152786,152991,153227,153552,153913,154161,154459,154660,154802,154966,155955,156249,156420,157563,	0	ENSDARG00000013802.10	cmpl	cmpl	0,2,2,0,1,0,2,0,2,2,2,0,0,0,-1,
ENSDART00000160221.2	chr1	-	152315	156375	152315	156375	14	152315,152662,152865,153153,153451,153771,154085,154355,154605,154760,154899,155881,156159,156339,	152405,152786,152991,153227,153552,153913,154161,154459,154660,154801,154966,155955,156249,156375,	0	ENSDARG00000013802.10	cmpl	cmpl	0,2,2,0,1,0,2,0,2,0,2,0,0,0,
ENSDART00000152573.1	chr1	-	153237	153846	153846	153846	3	153237,153451,153771,	153337,153552,153846,	0	ENSDARG00000013802.10	none	none	-1,-1,-1,
ENSDART00000152426.2	chr1	-	153642	157554	157554	157554	10	153642,154085,154355,154605,154760,154900,155881,156159,156339,157473,	153913,154161,154459,154660,154802,154966,155955,156249,156420,157554,	0	ENSDARG00000013802.10	none	none	-1,-1,-1,-1,-1,-1,-1,-1,-1,-1,
ENSDART00000152132.1	chr1	-	154085	154808	154808	154808	4	154085,154355,154605,154760,	154161,154459,154660,154808,	0	ENSDARG00000013802.10	none	none	-1,-1,-1,-1,
ENSDART00000152200.1	chr1	-	154612	157531	157531	157531	6	154612,154760,154900,155881,156339,157473,	154660,154802,154966,156249,156417,157531,	0	ENSDARG00000013802.10	none	none	-1,-1,-1,-1,-1,-1,
ENSDART00000152361.1	chr1	-	155769	157533	157533	157533	4	155769,156159,156339,157473,	155955,156249,156420,157533,	0	ENSDARG00000013802.10	none	none	-1,-1,-1,-1,
ENSDART00000152205.1	chr1	+	157792	158136	158030	158136	1	157792,	158136,	0	ENSDARG00000096578.3	cmpl	incmpl	0,
ENSDART00000160843.2	chr1	+	158033	167398	158033	167398	18	158033,160185,160728,161005,161168,161342,161868,162055,162301,162506,162727,163098,164115,164437,165168,165394,166917,167306,	158136,160301,160832,161075,161242,161505,161958,162138,162369,162625,162920,163203,164226,164523,165276,165508,167023,167398,	0	ENSDARG00000096578.3	cmpl	incmpl	0,1,0,2,0,2,0,0,2,1,0,1,1,1,0,0,0,1,
ENSDART00000188956.1	chr1	-	160301	201004	160301	201004	10	160301,161988,164464,168492,172501,186788,195072,200343,200701,200977,	160382,162018,164477,168543,172532,186807,195081,200352,200728,201004,	0	ENSDARG00000109848.1	incmpl	incmpl	0,0,2,2,1,0,0,0,0,0,
ENSDART00000168760.2	chr1	+	176582	182258	176582	182258	7	176582,176953,177267,177561,180031,181635,182118,	176951,176979,177478,177698,180066,181803,182258,	0	ENSDARG00000100181.2	incmpl	cmpl	0,0,2,0,2,1,1,
ENSDART00000160425.2	chr1	+	176585	182258	176585	182258	8	176585,176909,177228,177561,179953,181553,181635,182118,	176859,176955,177478,177684,180004,181569,181803,182258,	0	ENSDARG00000100181.2	incmpl	cmpl	0,1,2,0,0,0,1,1,
ENSDART00000164091.2	chr1	-	184914	191971	185329	191796	8	184914,186268,186842,187634,188684,189650,190064,191710,	185422,186454,187015,187731,188809,189809,190216,191971,	0	ENSDARG00000029936.8	cmpl	cmpl	0,0,1,0,1,1,2,0,
ENSDART00000159237.2	chr1	-	184915	192033	185329	186923	4	184915,186268,186842,191793,	185422,186454,186930,192033,	0	ENSDARG00000029936.8	cmpl	cmpl	0,0,0,-1,
ENSDART00000060968.7	chr1	-	200293	206208	201106	206157	8	200293,200942,201767,202079,202800,203028,204330,205952,	200563,201264,201900,202204,202941,203154,204495,206208,	0	ENSDARG00000041589.7	cmpl	cmpl	-1,1,0,1,1,1,1,0,
ENSDART00000060971.5	chr1	-	208180	214911	209226	213116	8	208180,208969,210262,210733,211526,212015,213061,214820,	208616,209306,210359,210816,211657,212184,213206,214911,	0	ENSDARG00000041592.6	cmpl	cmpl	-1,1,0,1,2,1,0,-1,
ENSDART00000109529.4	chr1	+	218523	225137	218523	225137	12	218523,219287,220971,221270,221462,221676,222018,222367,222677,223506,224073,224993,	218910,219467,221166,221399,221555,221851,222136,222563,222828,223586,224223,225137,	0	ENSDARG00000075108.4	cmpl	cmpl	0,0,0,0,0,0,1,2,0,1,0,0,
ENSDART00000003317.11	chr1	+	227240	241707	230362	241389	12	227240,230294,232964,234084,235302,236208,236815,237096,237272,238007,238626,241280,	227378,230374,233025,234194,235403,236386,236962,237165,237424,238174,238678,241707,	0	ENSDARG00000016304.11	cmpl	cmpl	-1,0,0,1,0,2,0,0,0,2,1,2,
ENSDART00000153285.3	chr1	+	230362	243798	230362	241389	11	230362,232964,234084,235302,236208,236815,237096,237272,238007,238626,241280,	230374,233025,234194,235403,236374,236962,237165,237424,238174,238678,243798,	0	ENSDARG00000016304.11	cmpl	cmpl	0,0,1,0,2,0,0,0,2,1,2,
ENSDART00000081743.6	chr1	+	245075	258138	245250	255949	7	245075,251600,252823,254095,254427,254890,255656,	245952,251728,252981,254179,254552,255092,258138,	0	ENSDARG00000058803.6	cmpl	cmpl	0,0,2,1,1,0,1,
ENSDART00000111806.5	chr1	+	260038	296057	260090	295713	58	260038,260877,262698,263434,264300,264494,264800,264982,265794,266480,266935,267255,267899,268686,269303,269572,270286,270437,271012,271590,271758,272114,273578,273806,274441,275337,276136,276816,277007,277588,278219,278718,279737,280233,280517,281043,281586,282712,283298,283841,285261,285643,286029,286347,287083,287850,288108,288294,288770,289462,290260,290845,291653,292544,293398,293855,294243,…	260146,260984,262788,263553,264420,264576,264868,265057,265846,266568,267065,267375,268052,268834,269403,269930,270343,270647,271087,271659,271890,272292,273724,274079,274654,275478,276337,276918,277091,277861,278432,278787,279821,280356,280709,281244,281778,282892,283478,283979,285354,285727,286146,286515,287185,287931,288210,288477,288986,289669,290464,290992,291766,292642,293504,294136,294309,…	0	ENSDARG00000063385.7	cmpl	cmpl	0,2,1,1,0,0,1,0,0,1,2,0,0,0,1,2,0,0,0,0,0,0,1,0,0,0,0,0,0,0,0,0,0,0,0,0,0,0,0,0,0,0,0,0,0,0,0,0,0,0,0,0,0,2,1,2,1,1,
ENSDART00000092584.5	chr1	+	260038	296055	260954	295713	10	260038,260877,262698,290920,291653,292544,293398,293855,294243,295600,	260146,260984,262773,290992,291766,292642,293504,294136,294309,296055,	0	ENSDARG00000063385.7	cmpl	cmpl	-1,0,0,0,0,2,1,2,1,1,
ENSDART00000139438.2	chr1	+	260039	293894	293894	293894	6	260039,260877,291681,292544,293398,293855,	260146,260976,291766,292642,293504,293894,	0	ENSDARG00000063385.7	none	none	-1,-1,-1,-1,-1,-1,
ENSDART00000148172.2	chr1	+	267034	269883	267034	269883	4	267034,267255,269303,269572,	267065,267322,269403,269883,	0	ENSDARG00000063385.7	incmpl	incmpl	2,0,1,2,
ENSDART00000133431.2	chr1	+	277730	280259	277730	280259	5	277730,278219,278727,279737,280233,	277861,278432,278787,279821,280259,	0	ENSDARG00000063385.7	incmpl	incmpl	1,0,0,0,0,
ENSDART00000148261.2	chr1	+	292544	296057	292544	295713	4	292544,293398,293855,295600,	292642,293504,294136,296057,	0	ENSDARG00000063385.7	incmpl	cmpl	2,1,2,1,
ENSDART00000010092.7	chr1	-	312783	338445	313226	338198	15	312783,316018,317590,318596,319251,320859,321179,323451,323836,326014,330093,333110,333252,337907,338137,	313378,316226,317733,318765,319416,321049,321298,323573,323962,326134,330216,333173,333277,338068,338445,	0	ENSDARG00000007804.8	cmpl	cmpl	1,0,1,0,0,2,0,1,1,1,1,1,0,1,0,
ENSDART00000098627.5	chr1	-	343291	354166	343705	353985	14	343291,344154,344484,345665,345973,347925,348329,349252,350047,350783,351083,351580,352301,353897,	343872,344383,344621,345834,346138,348112,348570,349381,350173,350906,351161,351605,352459,354166,	0	ENSDARG00000068261.5	cmpl	cmpl	1,0,1,0,0,2,1,1,1,1,1,0,1,0,
ENSDART00000136423.2	chr1	-	343616	345895	345895	345895	4	343616,344154,344484,345665,	343872,344383,344621,345895,	0	ENSDARG00000068261.5	none	none	-1,-1,-1,-1,
ENSDART00000141590.2	chr1	-	350839	354115	351127	353985	5	350839,351083,351588,352301,353897,	350906,351161,351605,352459,354115,	0	ENSDARG00000068261.5	cmpl	cmpl	-1,2,0,1,0,
ENSDART00000092524.6	chr1	-	357517	411331	357824	411246	24	357517,360312,361283,361558,361922,362422,365188,365342,365818,366546,368018,369352,369498,369940,370590,371543,372384,377186,378929,385143,388695,391780,392307,411191,	357900,360496,361387,361767,362005,362529,365262,365420,365896,366653,368142,369427,369613,370089,370747,371648,372458,377259,379010,385220,388790,391884,392425,411331,	0	ENSDARG00000063371.6	cmpl	cmpl	2,1,2,0,1,2,0,0,0,1,0,0,2,0,2,2,0,2,2,0,1,2,1,0,
ENSDART00000152173.2	chr1	+	418868	443759	418956	442143	29	418868,420172,420972,421747,422013,422574,423087,425075,425655,426638,427000,428134,428811,429537,430359,430902,431406,431718,432255,433128,433591,435142,438676,439455,440096,440598,441239,441723,442053,	419121,420301,421068,421852,422138,422738,423242,425152,425783,426887,427116,428306,428969,429614,430466,431057,431523,431819,432352,433266,433836,435221,438718,439604,440193,440729,441447,441843,443759,	0	ENSDARG00000078751.5	cmpl	cmpl	0,0,0,0,0,2,1,0,2,1,1,0,1,0,2,1,0,0,2,0,0,2,0,0,2,0,2,0,0,
ENSDART00000152799.2	chr1	-	454314	462165	454314	457480	6	454314,456537,457178,457410,458175,462049,	454696,456655,457318,457495,458342,462165,	0	ENSDARG00000078878.5	incmpl	cmpl	1,0,1,0,-1,-1,
ENSDART00000192527.1	chr1	-	466779	470812	467662	470772	4	466779,468448,470449,470649,	467842,468657,470567,470812,	0	ENSDARG00000016343.10	cmpl	cmpl	0,1,0,0,
ENSDART00000152684.3	chr1	-	466779	471925	467662	470772	5	466779,468448,470449,470649,471887,	467842,468657,470567,470807,471925,	0	ENSDARG00000016343.10	cmpl	cmpl	0,1,0,0,-1,
ENSDART00000152511.2	chr1	-	467742	471925	468670	470772	5	467742,468448,470449,470649,471887,	467842,468678,470567,470807,471925,	0	ENSDARG00000016343.10	cmpl	cmpl	-1,1,0,0,-1,
ENSDART00000144406.3	chr1	-	474084	494280	474286	493218	17	474084,475967,476926,477811,479784,483755,484061,484367,486291,487095,488323,489095,489249,489738,492071,493130,494237,	474685,476052,477127,477956,479998,483875,484273,484593,486857,487279,488467,489150,489351,489854,492247,493223,494280,	0	ENSDARG00000023678.8	cmpl	cmpl	0,2,2,1,0,0,1,0,1,0,0,2,2,0,1,0,-1,
ENSDART00000192494.1	chr1	-	474286	481841	474286	481841	6	474286,475967,476907,477811,479784,481823,	474685,476042,477127,477956,479998,481841,	0	ENSDARG00000023678.8	cmpl	cmpl	0,0,2,1,0,0,
ENSDART00000136878.2	chr1	-	479806	484588	484588	484588	3	479806,483755,484061,	479998,483875,484588,	0	ENSDARG00000023678.8	none	none	-1,-1,-1,
ENSDART00000031635.6	chr1	-	487188	493218	487188	493218	8	487188,487232,488323,489095,489249,489738,492071,493130,	487210,487279,488467,489150,489351,489854,492247,493218,	0	ENSDARG00000023678.8	cmpl	cmpl	2,0,0,2,2,0,1,0,
ENSDART00000108579.5	chr1	+	494296	505620	496318	504044	7	494296,496269,496698,499139,501293,501910,503867,	494382,496346,497132,499339,501422,502127,505620,	0	ENSDARG00000011299.11	cmpl	cmpl	-1,0,1,0,2,2,0,
ENSDART00000146732.3	chr1	+	494340	497021	496318	497021	4	494340,494952,496269,496698,	494382,495018,496346,497021,	0	ENSDARG00000011299.11	cmpl	incmpl	-1,-1,0,1,
ENSDART00000134581.2	chr1	+	494872	496858	496318	496858	3	494872,496269,496698,	495018,496346,496858,	0	ENSDARG00000011299.11	cmpl	incmpl	-1,0,1,
ENSDART00000109415.3	chr1	+	496267	505617	496318	504044	6	496267,496698,499139,501293,501910,503867,	496346,497132,499339,501422,502127,505617,	0	ENSDARG00000011299.11	cmpl	cmpl	0,1,0,2,2,0,
ENSDART00000144606.3	chr1	-	508884	513786	509158	512180	5	508884,509675,511500,511916,513592,	509494,510008,511779,512183,513786,	0	ENSDARG00000041575.7	cmpl	cmpl	0,0,0,0,-1,
ENSDART00000148162.2	chr1	-	509071	513762	509158	512180	5	509071,509675,511500,512067,513592,	509494,510008,511597,512183,513762,	0	ENSDARG00000041575.7	cmpl	cmpl	0,0,2,0,-1,
ENSDART00000138032.2	chr1	-	511770	513717	513717	513717	2	511770,513592,	512183,513717,	0	ENSDARG00000041575.7	none	none	-1,-1,
ENSDART00000109083.5	chr1	+	513985	518073	514087	517665	3	513985,515498,517499,	514219,515650,518073,	0	ENSDARG00000058962.6	cmpl	cmpl	0,0,2,
ENSDART00000081945.4	chr1	+	514000	518076	514087	517665	4	514000,515498,517499,517780,	514219,515650,517667,518076,	0	ENSDARG00000058962.6	cmpl	cmpl	0,0,2,-1,
ENSDART00000132385.2	chr1	+	514012	515322	515322	515322	2	514012,514693,	514227,515322,	0	ENSDARG00000058962.6	none	none	-1,-1,
ENSDART00000147610.2	chr1	-	518852	524433	518880	522606	4	518852,520413,522168,524223,	519127,520637,522626,524433,	0	ENSDARG00000089799.4	cmpl	cmpl	2,0,0,-1,
ENSDART00000020327.9	chr1	+	524387	530935	524820	530492	6	524387,524613,525887,527175,528432,530300,	524596,524878,525959,527324,528726,530935,	0	ENSDARG00000075325.5	cmpl	cmpl	-1,0,1,1,0,0,
ENSDART00000102421.4	chr1	+	524716	530935	525925	530492	5	524716,525887,527175,528432,530300,	524878,525959,527324,528726,530935,	0	ENSDARG00000075325.5	cmpl	cmpl	-1,0,1,0,0,
ENSDART00000184473.1	chr1	+	524820	532429	524820	530492	5	524820,525887,527175,528432,530300,	524878,525959,527324,528726,532429,	0	ENSDARG00000075325.5	cmpl	cmpl	0,1,1,0,0,
ENSDART00000179731.1	chr1	+	532765	549521	534215	549488	9	532765,534207,537273,540231,541016,543728,544318,546138,549344,	532899,534299,537328,540325,541085,543858,544438,546216,549521,	0	ENSDARG00000041570.9	cmpl	cmpl	-1,0,0,1,2,2,0,0,0,
ENSDART00000060944.8	chr1	+	532806	591328	580805	591263	20	532806,534207,537273,540231,541016,543728,544318,546138,549344,563303,580786,582243,586079,586759,587171,588236,588475,589010,590088,591173,	532899,534299,537328,540325,541085,543858,544438,546216,549452,563329,580845,582453,586219,586859,587239,588349,588541,589164,590136,591328,	0	ENSDARG00000041570.9	cmpl	cmpl	-1,-1,-1,-1,-1,-1,-1,-1,-1,-1,0,1,1,0,1,0,2,2,0,0,
ENSDART00000136011.2	chr1	+	537588	546217	546217	546217	6	537588,540231,541016,543728,544318,546138,	537717,540325,541085,543858,544438,546217,	0	ENSDARG00000041570.9	none	none	-1,-1,-1,-1,-1,-1,
ENSDART00000184316.1	chr1	-	552274	558260	552274	558260	2	552274,558231,	553355,558260,	0	ENSDARG00000113329.1	cmpl	cmpl	2,0,
ENSDART00000116068.2	chr1	+	576443	576521	576521	576521	1	576443,	576521,	0	ENSDARG00000081781.2	none	none	-1,
ENSDART00000147633.2	chr1	+	580641	591331	580805	591263	10	580641,582243,586079,586759,587171,588236,588475,589010,590088,591173,	580845,582453,586219,586859,587239,588349,588541,589164,590136,591331,	0	ENSDARG00000041570.9	cmpl	cmpl	0,1,1,0,1,0,2,2,0,0,
ENSDART00000143526.2	chr1	+	580687	586501	586501	586501	3	580687,582243,586079,	580845,582453,586501,	0	ENSDARG00000041570.9	none	none	-1,-1,-1,
ENSDART00000135944.3	chr1	+	594583	603397	594735	603397	5	594583,601719,601862,602990,603212,	594772,601785,601979,603140,603397,	0	ENSDARG00000058996.6	cmpl	incmpl	0,1,1,1,1,
ENSDART00000166731.2	chr1	+	594735	608055	594735	608055	12	594735,601719,601862,602990,603212,603536,603873,604126,605257,606094,606353,608016,	594772,601785,601979,603140,603397,603616,603896,604234,605270,606166,606387,608055,	0	ENSDARG00000058996.6	cmpl	cmpl	0,1,1,1,1,0,2,1,1,2,2,0,
ENSDART00000133165.2	chr1	+	604126	608247	604126	608093	4	604126,606090,606353,608016,	604235,606166,606387,608247,	0	ENSDARG00000058996.6	incmpl	cmpl	1,2,0,1,
ENSDART00000134456.3	chr1	-	610081	614638	610752	613188	4	610081,611186,613015,614541,	610784,611311,613192,614638,	0	ENSDARG00000014313.9	cmpl	cmpl	1,2,0,-1,
ENSDART00000004062.8	chr1	-	610326	614583	611145	613188	3	610326,613015,614541,	611311,613192,614583,	0	ENSDARG00000014313.9	cmpl	cmpl	2,0,-1,
ENSDART00000147937.3	chr1	-	610688	614592	610752	613188	4	610688,611186,613015,614503,	610784,611311,613192,614592,	0	ENSDARG00000014313.9	cmpl	cmpl	1,2,0,-1,
ENSDART00000146351.2	chr1	-	610692	614592	610752	613188	4	610692,611186,613015,614503,	610784,611311,613189,614592,	0	ENSDARG00000014313.9	cmpl	cmpl	1,2,0,-1,
ENSDART00000167331.2	chr1	-	617619	625875	621373	625875	5	617619,621564,622016,624539,625676,	621475,621711,622099,624593,625875,	0	ENSDARG00000104279.2	cmpl	incmpl	0,0,1,1,0,
ENSDART00000172116.2	chr1	-	620989	622179	622179	622179	3	620989,621564,622016,	621475,621711,622179,	0	ENSDARG00000104279.2	none	none	-1,-1,-1,
ENSDART00000161223.2	chr1	-	621024	625080	625080	625080	5	621024,621564,622016,624539,625047,	621475,621711,622099,624593,625080,	0	ENSDARG00000104279.2	none	none	-1,-1,-1,-1,-1,
ENSDART00000166786.2	chr1	-	621373	656693	621373	656693	19	621373,621564,622016,624539,625676,626155,626217,626257,626541,628681,629585,630206,633233,634787,635669,635999,637358,638268,656633,	621475,621711,622099,624593,625889,626196,626226,626281,626678,628840,629660,630340,633401,634996,635860,636112,637488,638436,656693,	0	ENSDARG00000104279.2	cmpl	cmpl	0,0,1,1,1,2,2,2,0,0,0,1,1,2,0,1,0,0,0,
ENSDART00000170483.2	chr1	-	621373	656693	621373	656693	18	621373,621564,622016,624539,625676,626155,626217,626257,626541,628681,629585,630206,634787,635669,635999,637358,638268,656633,	621475,621711,622099,624593,625889,626196,626226,626281,626678,628840,629660,630340,634996,635860,636112,637488,638436,656693,	0	ENSDARG00000104279.2	cmpl	cmpl	0,0,1,1,1,2,2,2,0,0,0,1,2,0,1,0,0,0,
ENSDART00000171019.2	chr1	-	626549	633356	626549	633356	5	626549,628681,629585,630206,633233,	626678,628840,629660,630340,633356,	0	ENSDARG00000104279.2	incmpl	incmpl	0,0,0,1,1,
ENSDART00000160564.2	chr1	-	658404	669717	660673	669535	4	658404,661461,665060,669456,	660810,661622,665160,669717,	0	ENSDARG00000103783.2	cmpl	cmpl	1,2,1,0,
ENSDART00000165894.2	chr1	-	673162	681116	673162	681116	10	673162,673605,675072,675332,675584,675942,676481,678210,680447,681114,	673284,674195,675248,675511,675771,676400,676614,678551,680995,681116,	0	ENSDARG00000103519.2	cmpl	incmpl	1,2,0,1,0,1,0,1,2,0,
ENSDART00000161072.2	chr1	-	691737	714626	691737	714626	8	691737,694660,695307,696430,700120,700614,701351,713720,	692524,694836,695483,696614,700404,700782,701484,714626,	0	ENSDARG00000100307.2	cmpl	cmpl	2,0,1,0,1,1,0,0,
ENSDART00000170884.2	chr1	-	960208	999556	960208	999556	24	960208,962578,976252,976427,976587,977388,977994,978213,978402,978543,980559,981161,981462,983163,985026,985467,988877,991700,992218,992879,997161,997475,997767,999411,	960225,962596,976394,976483,976658,977545,978046,978295,978472,978696,980811,981360,981572,983258,985261,985636,988963,991788,992344,992948,997273,997650,997863,999556,	0	ENSDARG00000101089.2	incmpl	cmpl	1,1,0,1,2,1,0,2,1,1,1,0,1,2,1,0,1,0,0,0,2,1,1,0,
ENSDART00000184660.1	chr1	+	961606	970951	965215	970633	8	961606,963236,965201,965505,967033,968355,970238,970505,	961665,963344,965343,965592,967124,968439,970380,970951,	0	ENSDARG00000115421.1	cmpl	cmpl	-1,-1,0,2,2,0,0,1,
ENSDART00000172235.2	chr1	-	973466	999556	973466	999556	28	973466,974586,975130,975359,975515,976252,976427,976587,977388,977994,978207,978252,978402,978543,980559,981161,981462,983163,985026,985467,988877,991700,992218,992879,997161,997475,997767,999411,	973664,974599,975148,975434,975525,976394,976483,976658,977545,978046,978241,978294,978472,978696,980811,981360,981572,983258,985261,985636,988963,991788,992344,992948,997273,997650,997863,999556,	0	ENSDARG00000101089.2	cmpl	cmpl	0,2,2,2,1,0,1,2,1,0,2,2,1,1,1,0,1,2,1,0,1,0,0,0,2,1,1,0,
ENSDART00000190086.1	chr1	-	1050940	1051057	1051057	1051057	1	1050940,	1051057,	0	ENSDARG00000115673.1	none	none	-1,
ENSDART00000187355.1	chr1	+	1218690	1218805	1218805	1218805	1	1218690,	1218805,	0	ENSDARG00000116514.1	none	none	-1,
ENSDART00000165762.2	chr1	-	1313604	1315753	1315753	1315753	2	1313604,1315596,	1313691,1315753,	0	ENSDARG00000103469.2	none	none	-1,-1,
ENSDART00000194139.1	chr1	-	1350110	1352997	1352997	1352997	3	1350110,1350840,1352444,	1350412,1350921,1352997,	0	ENSDARG00000117321.1	none	none	-1,-1,-1,
ENSDART00000194799.1	chr1	-	1350110	1352997	1352997	1352997	2	1350110,1352444,	1350921,1352997,	0	ENSDARG00000117321.1	none	none	-1,-1,
ENSDART00000130697.3	chr1	-	1362931	1402303	1363765	1402273	7	1362931,1367388,1377463,1378722,1391138,1395314,1402245,	1364280,1367514,1377631,1378827,1391295,1395571,1402303,	0	ENSDARG00000087646.3	cmpl	cmpl	1,1,1,1,0,1,0,
ENSDART00000118322.2	chr1	+	1575482	1575563	1575563	1575563	1	1575482,	1575563,	0	ENSDARG00000080051.2	none	none	-1,
ENSDART00000097626.3	chr1	+	1599978	1614500	1600090	1614284	5	1599978,1606884,1608278,1609350,1614252,	1600208,1607271,1608319,1609504,1614500,	0	ENSDARG00000067781.5	cmpl	cmpl	0,1,1,0,1,
ENSDART00000166094.2	chr1	-	1618993	1627487	1619152	1627487	4	1618993,1621003,1627165,1627359,	1619314,1621185,1627272,1627487,	0	ENSDARG00000099108.3	cmpl	incmpl	0,1,2,0,
ENSDART00000176787.2	chr1	-	1619152	1631399	1619152	1631399	6	1619152,1621000,1627165,1627359,1629000,1631330,	1619314,1621185,1627272,1627485,1629110,1631399,	0	ENSDARG00000099108.3	cmpl	incmpl	0,1,2,2,0,0,
ENSDART00000048828.5	chr1	+	1689774	1706159	1689849	1706063	22	1689774,1690011,1690217,1693968,1696389,1696587,1698728,1698917,1699267,1699662,1699878,1700162,1700621,1700826,1701061,1701310,1703098,1703895,1704132,1705606,1705795,1706034,	1689861,1690125,1690277,1694172,1696503,1696722,1698846,1699186,1699576,1699797,1700071,1700338,1700758,1700977,1701230,1701465,1703222,1704041,1704263,1705708,1705887,1706159,	0	ENSDARG00000001870.10	cmpl	cmpl	0,0,0,0,0,0,0,1,0,0,0,1,0,2,0,1,0,1,0,2,2,1,
ENSDART00000141426.2	chr1	+	1690046	1691025	1691025	1691025	2	1690046,1690217,	1690125,1691025,	0	ENSDARG00000001870.10	none	none	-1,-1,
ENSDART00000123205.3	chr1	+	1705129	1705880	1705880	1705880	2	1705129,1705795,	1705708,1705880,	0	ENSDARG00000001870.10	none	none	-1,-1,
ENSDART00000081047.5	chr1	+	1712139	1731564	1712344	1731350	22	1712139,1717342,1717550,1717691,1717994,1718198,1718413,1718612,1718960,1721185,1721484,1721753,1722001,1722534,1723105,1723353,1723587,1724057,1724289,1724499,1730908,1731321,	1712356,1717462,1717610,1717895,1718108,1718333,1718531,1718881,1719269,1721320,1721683,1721929,1722138,1722685,1723274,1723508,1723711,1724203,1724420,1724601,1731000,1731564,	0	ENSDARG00000002791.11	cmpl	cmpl	0,0,0,0,0,0,0,1,0,0,0,1,0,2,0,1,0,1,0,2,2,1,
ENSDART00000137184.2	chr1	+	1712152	1718527	1718527	1718527	5	1712152,1717793,1717994,1718198,1718413,	1712339,1717895,1718108,1718333,1718527,	0	ENSDARG00000002791.11	none	none	-1,-1,-1,-1,-1,
ENSDART00000135994.2	chr1	+	1717696	1723157	1723157	1723157	7	1717696,1721244,1721484,1721753,1722001,1722534,1723105,	1717772,1721320,1721683,1721929,1722138,1722685,1723157,	0	ENSDARG00000002791.11	none	none	-1,-1,-1,-1,-1,-1,-1,
ENSDART00000147682.2	chr1	+	1718610	1793371	1793371	1793371	2	1718610,1793329,	1718881,1793371,	0	ENSDARG00000002791.11	none	none	-1,-1,
ENSDART00000136381.2	chr1	+	1719206	1732326	1732326	1732326	3	1719206,1721185,1732108,	1719269,1721320,1732326,	0	ENSDARG00000002791.11	none	none	-1,-1,-1,
ENSDART00000132968.2	chr1	+	1730391	1731484	1731484	1731484	2	1730391,1731321,	1731000,1731484,	0	ENSDARG00000002791.11	none	none	-1,-1,
ENSDART00000006449.8	chr1	+	1789356	1796832	1789417	1796733	22	1789356,1789643,1789928,1790719,1792196,1792389,1792775,1792976,1793329,1793750,1793971,1794265,1794577,1794811,1795047,1795294,1795526,1795734,1796029,1796284,1796482,1796704,	1789429,1789754,1789988,1790923,1792310,1792524,1792893,1793245,1793638,1793885,1794164,1794441,1794714,1794962,1795216,1795449,1795650,1795880,1796160,1796386,1796574,1796832,	0	ENSDARG00000007739.11	cmpl	cmpl	0,0,0,0,0,0,0,1,0,0,0,1,0,2,0,1,0,1,0,2,2,1,
ENSDART00000144313.2	chr1	+	1790771	1792523	1792523	1792523	2	1790771,1792196,	1790923,1792523,	0	ENSDARG00000007739.11	none	none	-1,-1,
ENSDART00000103850.4	chr1	+	1805293	1815660	1805366	1815541	22	1805293,1805514,1806757,1807050,1807460,1807655,1807872,1808084,1808435,1810815,1811026,1811307,1811564,1811778,1812020,1812267,1812506,1812712,1812955,1815084,1815270,1815512,	1805378,1805628,1806817,1807254,1807574,1807790,1807990,1808353,1808744,1810950,1811219,1811483,1811701,1811929,1812189,1812422,1812630,1812858,1813086,1815186,1815362,1815660,	0	ENSDARG00000039131.5	cmpl	cmpl	0,0,0,0,0,0,0,1,0,0,0,1,0,2,0,1,0,1,0,2,2,1,
ENSDART00000006013.9	chr1	+	1838163	1850104	1838231	1849424	22	1838163,1838376,1838811,1840058,1840476,1840678,1840899,1842801,1843151,1844898,1845143,1845424,1845681,1845895,1846137,1846381,1846623,1846822,1847074,1847346,1847542,1849395,	1838243,1838490,1838871,1840259,1840590,1840813,1841017,1843070,1843460,1845033,1845336,1845600,1845818,1846046,1846306,1846536,1846747,1846968,1847205,1847448,1847634,1850104,	0	ENSDARG00000040252.6	cmpl	cmpl	0,0,0,0,0,0,0,1,0,0,0,1,0,2,0,1,0,1,0,2,2,1,
ENSDART00000143337.3	chr1	-	1870860	1875118	1875118	1875118	4	1870860,1874009,1874826,1875071,	1870899,1874042,1874859,1875118,	0	ENSDARG00000089477.4	none	none	-1,-1,-1,-1,
ENSDART00000137332.3	chr1	-	1874007	1885600	1885600	1885600	7	1874007,1874826,1875071,1877181,1878449,1884210,1885446,	1874042,1874859,1875113,1877214,1878551,1884504,1885600,	0	ENSDARG00000089477.4	none	none	-1,-1,-1,-1,-1,-1,-1,
ENSDART00000131675.3	chr1	-	1874426	1885594	1874771	1885516	7	1874426,1875071,1877181,1878449,1882647,1884210,1885446,	1874776,1875113,1877214,1878551,1882920,1884504,1885594,	0	ENSDARG00000089477.4	cmpl	cmpl	1,1,1,1,1,1,0,
ENSDART00000122187.3	chr1	-	1875069	1885516	1875069	1885516	6	1875069,1877181,1878449,1882647,1884210,1885446,	1875113,1877214,1878551,1882920,1884504,1885516,	0	ENSDARG00000089477.4	incmpl	cmpl	1,1,1,1,1,0,
ENSDART00000138723.3	chr1	-	1877190	1928047	1928047	1928047	6	1877190,1878432,1882647,1884210,1925384,1927994,	1877214,1878551,1882920,1884504,1925440,1928047,	0	ENSDARG00000089477.4	none	none	-1,-1,-1,-1,-1,-1,
ENSDART00000135193.3	chr1	-	1884359	1928111	1928111	1928111	3	1884359,1925384,1927994,	1884504,1925440,1928111,	0	ENSDARG00000089477.4	none	none	-1,-1,-1,
ENSDART00000143790.3	chr1	-	1887619	1928122	1928122	1928122	6	1887619,1888612,1890173,1893107,1925384,1927994,	1887663,1888675,1890440,1893410,1925440,1928122,	0	ENSDARG00000089477.4	none	none	-1,-1,-1,-1,-1,-1,
ENSDART00000165669.2	chr1	-	1888540	1894722	1888571	1893971	4	1888540,1890173,1893107,1893913,	1888675,1890440,1893410,1894722,	0	ENSDARG00000089477.4	cmpl	cmpl	1,1,1,0,
ENSDART00000147773.3	chr1	-	1890170	1894005	1894005	1894005	3	1890170,1893107,1893913,	1890440,1893410,1894005,	0	ENSDARG00000089477.4	none	none	-1,-1,-1,
ENSDART00000136696.2	chr1	-	1890345	1898407	1898407	1898407	3	1890345,1893107,1898372,	1890440,1893410,1898407,	0	ENSDARG00000089477.4	none	none	-1,-1,-1,
ENSDART00000152442.2	chr1	+	1896736	1899848	1896790	1899848	5	1896736,1897796,1898227,1899511,1899707,	1896848,1898096,1898418,1899563,1899848,	0	ENSDARG00000093102.4	cmpl	incmpl	0,1,1,0,1,
ENSDART00000139418.2	chr1	+	1898908	1899843	1899843	1899843	2	1898908,1899707,	1899563,1899843,	0	ENSDARG00000093102.4	none	none	-1,-1,
ENSDART00000142874.3	chr1	+	1904418	1911381	1904475	1909483	7	1904418,1906592,1906988,1907372,1908555,1909343,1911270,	1904533,1906892,1907231,1907390,1908765,1909483,1911381,	0	ENSDARG00000095102.3	cmpl	cmpl	0,1,1,1,1,1,-1,
ENSDART00000131463.2	chr1	+	1915966	1923253	1916002	1923253	4	1915966,1921753,1922153,1923200,	1916060,1922053,1922399,1923253,	0	ENSDARG00000040250.7	cmpl	incmpl	0,1,1,1,
ENSDART00000110331.4	chr1	+	1941030	2000357	1941296	2000192	9	1941030,1949070,1957201,1961647,1975030,1978011,1982607,1996618,2000028,	1941339,1949436,1957609,1962016,1975453,1978419,1982715,1996924,2000357,	0	ENSDARG00000075505.6	cmpl	cmpl	0,1,1,1,1,1,1,1,1,
ENSDART00000008332.5	chr1	+	2025084	2027100	2025084	2027100	1	2025084,	2027100,	0	ENSDARG00000010376.5	cmpl	cmpl	0,
ENSDART00000041936.7	chr1	-	2048046	2051599	2048311	2049301	2	2048046,2051572,	2049309,2051599,	0	ENSDARG00000033684.7	cmpl	cmpl	0,-1,
ENSDART00000058878.4	chr1	-	2060429	2061419	2060429	2061419	1	2060429,	2061419,	0	ENSDARG00000040247.4	cmpl	cmpl	0,
ENSDART00000109983.2	chr1	-	2074512	2075529	2074512	2075529	1	2074512,	2075529,	0	ENSDARG00000078743.2	cmpl	cmpl	0,
ENSDART00000164488.2	chr1	+	2101540	2216362	2129457	2214195	8	2101540,2128968,2185501,2186135,2190701,2201459,2205708,2214180,	2101796,2129631,2185666,2186336,2190956,2201616,2205761,2216362,	0	ENSDARG00000018460.11	cmpl	cmpl	-1,0,0,0,0,0,1,0,
ENSDART00000122626.3	chr1	+	2101540	2216362	2129457	2214195	9	2101540,2128968,2185501,2186135,2190701,2201063,2201459,2205666,2214180,	2101796,2129631,2185666,2186336,2190956,2201117,2201616,2205761,2216362,	0	ENSDARG00000018460.11	cmpl	cmpl	-1,0,0,0,0,0,0,1,0,
ENSDART00000182153.1	chr1	+	2101540	2216362	2129457	2214195	6	2101540,2128968,2190701,2201459,2205666,2214180,	2101796,2129508,2190956,2201616,2205761,2216362,	0	ENSDARG00000018460.11	cmpl	cmpl	-1,0,0,0,1,0,
ENSDART00000167050.2	chr1	+	2101540	2216362	2129457	2214195	7	2101540,2128968,2190701,2201063,2201459,2205666,2214180,	2101796,2129508,2190956,2201117,2201616,2205761,2216362,	0	ENSDARG00000018460.11	cmpl	cmpl	-1,0,0,0,0,1,0,
ENSDART00000128187.4	chr1	+	2101540	2129631	2129457	2129631	2	2101540,2128968,	2101796,2129631,	0	ENSDARG00000018460.11	cmpl	incmpl	-1,0,
ENSDART00000131714.3	chr1	+	2112725	2129483	2129457	2129483	2	2112725,2128968,	2112944,2129483,	0	ENSDARG00000018460.11	cmpl	incmpl	-1,0,
ENSDART00000138396.2	chr1	+	2112752	2129483	2129457	2129483	2	2112752,2128968,	2112880,2129483,	0	ENSDARG00000018460.11	cmpl	incmpl	-1,0,
ENSDART00000098059.5	chr1	+	2128969	2214317	2129457	2214195	6	2128969,2190701,2201063,2201459,2205666,2214180,	2129508,2190956,2201117,2201616,2205761,2214317,	0	ENSDARG00000018460.11	cmpl	cmpl	0,0,0,0,1,0,
ENSDART00000022019.8	chr1	+	2128969	2214317	2129457	2214195	7	2128969,2185501,2186135,2190701,2201459,2205708,2214180,	2129631,2185666,2186336,2190956,2201616,2205761,2214317,	0	ENSDARG00000018460.11	cmpl	cmpl	0,0,0,0,0,1,0,
ENSDART00000180074.1	chr1	+	2128969	2214309	2129457	2214195	5	2128969,2190701,2201459,2205666,2214180,	2129508,2190956,2201616,2205761,2214309,	0	ENSDARG00000018460.11	cmpl	cmpl	0,0,0,1,0,
ENSDART00000074923.5	chr1	+	2129163	2214227	2129457	2214195	8	2129163,2185501,2186135,2190701,2201063,2201459,2205708,2214180,	2129631,2185666,2186336,2190956,2201117,2201616,2205761,2214227,	0	ENSDARG00000018460.11	cmpl	cmpl	0,0,0,0,0,0,1,0,
ENSDART00000124534.4	chr1	+	2129174	2217861	2129457	2214195	8	2129174,2185501,2186135,2190701,2201063,2201459,2205666,2214180,	2129631,2185666,2186336,2190956,2201117,2201616,2205761,2217861,	0	ENSDARG00000018460.11	cmpl	cmpl	0,0,0,0,0,0,1,0,
ENSDART00000136680.2	chr1	+	2190699	2214397	2214397	2214397	5	2190699,2201459,2203815,2205708,2214180,	2190956,2201616,2203851,2205761,2214397,	0	ENSDARG00000018460.11	none	none	-1,-1,-1,-1,-1,
ENSDART00000132126.2	chr1	+	2190713	2214400	2190713	2214195	4	2190713,2201459,2205666,2214180,	2190956,2201616,2205761,2214400,	0	ENSDARG00000018460.11	incmpl	cmpl	0,0,1,0,
ENSDART00000058877.5	chr1	+	2222362	2240119	2222365	2240119	2	2222362,2239881,	2222679,2240119,	0	ENSDARG00000040246.5	cmpl	cmpl	0,2,
ENSDART00000058876.9	chr1	+	2260406	2299553	2260446	2298679	26	2260406,2265142,2270695,2272207,2273625,2274231,2275413,2276006,2276688,2278969,2279162,2279366,2280693,2281414,2283295,2283461,2285215,2286028,2286824,2287516,2288512,2288650,2294393,2295942,2296706,2298592,	2260524,2265223,2270888,2272310,2273722,2274336,2275536,2276127,2276776,2279076,2279287,2279456,2280867,2281633,2283379,2283594,2285337,2286125,2286997,2287628,2288568,2288773,2294613,2296171,2296848,2299553,	0	ENSDARG00000040245.9	cmpl	cmpl	0,0,0,1,2,0,0,0,1,2,1,0,0,0,0,0,1,0,1,0,1,0,0,1,2,0,
ENSDART00000146095.2	chr1	+	2272260	2288773	2288773	2288773	8	2272260,2273625,2274231,2275413,2286890,2287516,2288512,2288650,	2272310,2273722,2274336,2275555,2286997,2287628,2288568,2288773,	0	ENSDARG00000040245.9	none	none	-1,-1,-1,-1,-1,-1,-1,-1,
ENSDART00000116379.2	chr1	+	2275604	2275742	2275742	2275742	1	2275604,	2275742,	0	ENSDARG00000082290.2	none	none	-1,
ENSDART00000140507.2	chr1	+	2286848	2299546	2299546	2299546	3	2286848,2287516,2299143,	2286997,2287584,2299546,	0	ENSDARG00000040245.9	none	none	-1,-1,-1,
ENSDART00000143008.2	chr1	+	2296590	2299206	2299206	2299206	3	2296590,2296706,2298592,	2296617,2296848,2299206,	0	ENSDARG00000040245.9	none	none	-1,-1,-1,
ENSDART00000143758.2	chr1	+	2301957	2302623	2302623	2302623	2	2301957,2302243,	2302137,2302623,	0	ENSDARG00000074381.6	none	none	-1,-1,
ENSDART00000108919.5	chr1	+	2301960	2394973	2321383	2394768	3	2301960,2321367,2394516,	2302137,2321557,2394973,	0	ENSDARG00000074381.6	cmpl	cmpl	-1,0,0,
ENSDART00000141036.2	chr1	+	2301971	2441683	2441683	2441683	7	2301971,2431919,2432139,2432723,2433452,2436228,2441677,	2302105,2431967,2432229,2432806,2433565,2436392,2441683,	0	ENSDARG00000074381.6	none	none	-1,-1,-1,-1,-1,-1,-1,
ENSDART00000142944.2	chr1	+	2301973	2444210	2321383	2443772	27	2301973,2321367,2394516,2394941,2397013,2400342,2401419,2402905,2404635,2405355,2405797,2407642,2407857,2420281,2423668,2426373,2429554,2430337,2431681,2431898,2432139,2432723,2433452,2436228,2441677,2441926,2443690,	2302137,2321557,2394621,2394984,2397092,2400440,2401534,2403053,2404731,2405519,2405866,2407718,2408056,2420457,2423758,2426507,2429636,2430575,2431812,2431967,2432229,2432806,2433565,2436392,2441785,2442078,2444210,	0	ENSDARG00000074381.6	cmpl	cmpl	-1,0,0,0,1,2,1,2,0,0,2,2,0,1,0,0,2,0,1,0,0,0,2,1,0,0,2,
ENSDART00000143361.3	chr1	+	2301973	2409126	2321383	2409126	13	2301973,2321367,2394516,2394941,2397013,2400342,2401419,2402905,2404635,2405355,2405797,2407642,2407857,	2302137,2321557,2394621,2394984,2397092,2400440,2401534,2403053,2404731,2405519,2405866,2407718,2409126,	0	ENSDARG00000074381.6	cmpl	cmpl	-1,0,0,0,1,2,1,2,0,0,2,2,0,
ENSDART00000157662.2	chr1	+	2321383	2394768	2321383	2394768	2	2321383,2394516,	2321557,2394768,	0	ENSDARG00000074381.6	cmpl	cmpl	0,0,
ENSDART00000144500.2	chr1	-	2331636	2334254	2331969	2334175	4	2331636,2332738,2332897,2334091,	2332053,2332798,2332960,2334254,	0	ENSDARG00000095179.2	cmpl	cmpl	0,0,0,0,
ENSDART00000119884.2	chr1	+	2403102	2403224	2403224	2403224	1	2403102,	2403224,	0	ENSDARG00000084484.2	none	none	-1,
ENSDART00000183832.1	chr1	+	2431955	2443772	2431955	2443772	8	2431955,2432139,2432723,2433452,2436247,2441677,2441926,2443690,	2431967,2432229,2432806,2433569,2436392,2441785,2442078,2443772,	0	ENSDARG00000074381.6	cmpl	cmpl	0,0,0,2,2,0,0,2,
ENSDART00000103785.5	chr1	-	2446995	2449395	2448093	2448552	2	2446995,2449303,	2448591,2449395,	0	ENSDARG00000070579.5	cmpl	cmpl	0,-1,
ENSDART00000190207.1	chr1	-	2447024	2448592	2448093	2448552	1	2447024,	2448592,	0	ENSDARG00000070579.5	cmpl	cmpl	0,
ENSDART00000152555.2	chr1	-	2448050	2453185	2448093	2448552	2	2448050,2453064,	2448591,2453185,	0	ENSDARG00000070579.5	cmpl	cmpl	0,-1,
ENSDART00000055779.4	chr1	-	2450139	2453174	2451602	2452178	2	2450139,2453064,	2452269,2453174,	0	ENSDARG00000038248.5	cmpl	cmpl	0,-1,
ENSDART00000103795.5	chr1	-	2454093	2457546	2455320	2457469	2	2454093,2457442,	2455779,2457546,	0	ENSDARG00000070581.5	cmpl	cmpl	0,0,
ENSDART00000152251.2	chr1	-	2704603	2714275	2714275	2714275	2	2704603,2714236,	2705226,2714275,	0	ENSDARG00000096559.2	none	none	-1,-1,
ENSDART00000126093.3	chr1	+	2712955	3036019	2713204	3035936	10	2712955,2789561,2884722,2915520,2965058,2977902,2980157,3023582,3030534,3035736,	2713361,2789720,2885114,2915686,2965189,2978049,2980187,3023713,3030710,3036019,	0	ENSDARG00000103156.2	cmpl	cmpl	0,1,1,0,1,0,0,0,2,1,
ENSDART00000157572.2	chr1	-	3100243	3295045	3100243	3295045	8	3100243,3104841,3159643,3221037,3224506,3227352,3284475,3294888,	3100332,3104992,3159764,3221163,3224646,3228041,3284637,3295045,	0	ENSDARG00000103647.2	cmpl	cmpl	1,0,2,2,0,1,1,0,
ENSDART00000165341.2	chr1	-	3297366	3297451	3297451	3297451	1	3297366,	3297451,	0	ENSDARG00000104805.2	none	none	-1,
ENSDART00000160452.2	chr1	-	3297483	3297570	3297570	3297570	1	3297483,	3297570,	0	ENSDARG00000100273.2	none	none	-1,
ENSDART00000168824.2	chr1	-	3297602	3297755	3297755	3297755	1	3297602,	3297755,	0	ENSDARG00000104910.2	none	none	-1,
ENSDART00000164057.2	chr1	-	3297847	3297936	3297936	3297936	1	3297847,	3297936,	0	ENSDARG00000099103.2	none	none	-1,
ENSDART00000162113.2	chr1	-	3298005	3298088	3298088	3298088	1	3298005,	3298088,	0	ENSDARG00000098078.2	none	none	-1,
ENSDART00000165512.2	chr1	-	3298111	3298249	3298249	3298249	1	3298111,	3298249,	0	ENSDARG00000104155.2	none	none	-1,
ENSDART00000194827.1	chr1	-	3305548	3309194	3309194	3309194	2	3305548,3308889,	3306074,3309194,	0	ENSDARG00000117575.1	none	none	-1,-1,
ENSDART00000194988.1	chr1	-	3305548	3330435	3330435	3330435	2	3305548,3330397,	3306074,3330435,	0	ENSDARG00000117575.1	none	none	-1,-1,
ENSDART00000121234.3	chr1	+	3759923	3760034	3760034	3760034	1	3759923,	3760034,	0	ENSDARG00000088916.2	none	none	-1,
ENSDART00000163793.2	chr1	+	4101740	4154332	4150591	4153084	2	4101740,4150591,	4101889,4154332,	0	ENSDARG00000098769.2	cmpl	cmpl	-1,0,
ENSDART00000166854.2	chr1	-	4210497	4210652	4210652	4210652	1	4210497,	4210652,	0	ENSDARG00000104115.2	none	none	-1,
ENSDART00000166256.2	chr1	-	4237207	4250283	4250283	4250283	2	4237207,4250193,	4237621,4250283,	0	ENSDARG00000102013.2	none	none	-1,-1,
ENSDART00000194519.1	chr1	+	4598059	4680477	4680477	4680477	3	4598059,4663615,4679593,	4598270,4663822,4680477,	0	ENSDARG00000117775.1	none	none	-1,-1,-1,
ENSDART00000117908.2	chr1	-	5078370	5078488	5078488	5078488	1	5078370,	5078488,	0	ENSDARG00000082581.2	none	none	-1,
ENSDART00000052423.6	chr1	+	5273480	5277583	5275814	5276720	2	5273480,5275763,	5273957,5277583,	0	ENSDARG00000078308.5	cmpl	cmpl	-1,0,
ENSDART00000189676.1	chr1	+	5275810	5277577	5275814	5276720	1	5275810,	5277577,	0	ENSDARG00000078308.5	cmpl	cmpl	0,
ENSDART00000103724.6	chr1	-	5354488	5394752	5363570	5394547	8	5354488,5363568,5365321,5365755,5369389,5375273,5378925,5394511,	5359003,5363674,5365388,5365880,5369477,5375404,5379088,5394752,	0	ENSDARG00000033928.11	cmpl	cmpl	-1,1,0,1,0,1,0,0,
ENSDART00000188453.1	chr1	-	5363568	5394791	5363570	5394547	7	5363568,5365321,5365755,5369389,5375273,5378925,5394511,	5363674,5365388,5365880,5369477,5375404,5379088,5394791,	0	ENSDARG00000033928.11	cmpl	cmpl	1,0,1,0,1,0,0,
ENSDART00000040204.6	chr1	+	5402475	5419116	5402680	5419055	4	5402475,5414279,5415839,5418080,	5402683,5414502,5415988,5419116,	0	ENSDARG00000031164.6	cmpl	cmpl	0,0,1,0,
ENSDART00000122569.3	chr1	+	5402533	5418507	5418507	5418507	5	5402533,5414279,5415839,5418080,5418233,	5402683,5414502,5415988,5418147,5418507,	0	ENSDARG00000031164.6	none	none	-1,-1,-1,-1,-1,
ENSDART00000055047.7	chr1	+	5422438	5434261	5425361	5433680	8	5422438,5425314,5426588,5428525,5430718,5430933,5431292,5433538,	5422532,5425447,5426808,5428659,5430839,5431029,5431414,5434261,	0	ENSDARG00000037777.7	cmpl	cmpl	-1,0,2,0,2,0,0,2,
ENSDART00000142248.2	chr1	+	5422575	5426706	5425361	5426706	3	5422575,5425314,5426588,	5422872,5425447,5426706,	0	ENSDARG00000037777.7	cmpl	incmpl	-1,0,2,
ENSDART00000137670.3	chr1	+	5437389	5487162	5487162	5487162	5	5437389,5438742,5449917,5484662,5487071,	5437426,5438836,5450289,5484805,5487162,	0	ENSDARG00000016706.11	none	none	-1,-1,-1,-1,-1,
ENSDART00000139261.3	chr1	+	5438742	5450316	5450316	5450316	2	5438742,5449917,	5438836,5450316,	0	ENSDARG00000016706.11	none	none	-1,-1,
ENSDART00000136282.2	chr1	+	5438742	5450444	5450444	5450444	2	5438742,5449917,	5438836,5450444,	0	ENSDARG00000016706.11	none	none	-1,-1,
ENSDART00000114035.4	chr1	-	5449776	5455502	5449878	5455439	3	5449776,5452442,5454985,	5450250,5452603,5455502,	0	ENSDARG00000030350.7	cmpl	cmpl	0,1,0,
ENSDART00000040368.5	chr1	-	5449869	5455498	5449878	5455439	3	5449869,5452442,5455009,	5450250,5452603,5455498,	0	ENSDARG00000030350.7	cmpl	cmpl	0,1,0,
ENSDART00000022307.10	chr1	+	5485798	5504130	5485896	5503524	15	5485798,5487071,5489856,5490382,5492300,5495169,5495395,5497292,5497519,5498474,5499008,5500561,5500734,5501994,5503404,	5485912,5487198,5490000,5490471,5492452,5495326,5495521,5497400,5497605,5498564,5499134,5500654,5500917,5502150,5504130,	0	ENSDARG00000016706.11	cmpl	cmpl	0,1,2,2,1,0,1,1,1,0,0,0,0,0,0,
ENSDART00000141973.2	chr1	+	5497284	5502084	5502084	5502084	7	5497284,5497519,5498474,5499008,5500561,5500734,5501994,	5497400,5497605,5498564,5499134,5500654,5500917,5502084,	0	ENSDARG00000016706.11	none	none	-1,-1,-1,-1,-1,-1,-1,
ENSDART00000160791.2	chr1	-	5504127	5542565	5505058	5542565	45	5504127,5506830,5507231,5507423,5509087,5509331,5509557,5511141,5511338,5511640,5511962,5512238,5512433,5512724,5513245,5513474,5513709,5513966,5514159,5515820,5516013,5516527,5519288,5519685,5519954,5521541,5521726,5522069,5524245,5524538,5524779,5526632,5526901,5528737,5531082,5532844,5533642,5536070,5536398,5536735,5537397,5538030,5540620,5540831,5542519,	5505136,5506920,5507338,5507549,5509249,5509470,5510045,5511231,5511527,5511730,5512145,5512326,5512621,5513024,5513359,5513630,5513883,5514083,5514426,5515910,5516202,5516806,5519480,5519772,5520123,5521636,5521990,5522348,5524440,5524628,5524908,5526809,5527070,5528850,5531223,5532973,5533795,5536247,5536581,5536933,5537559,5538168,5540752,5540969,5542565,	0	ENSDARG00000006526.12	cmpl	incmpl	0,0,1,1,1,0,1,1,1,1,1,0,1,1,1,1,1,1,1,1,1,1,1,1,0,1,1,1,1,1,1,1,0,1,1,1,1,1,1,1,1,1,1,1,0,
ENSDART00000103755.4	chr1	-	5504127	5543065	5505058	5542977	46	5504127,5506830,5507231,5507423,5509087,5509331,5509557,5511141,5511338,5511640,5511962,5512238,5512433,5512724,5513245,5513474,5513709,5513966,5514159,5515820,5516013,5516527,5519288,5519685,5519954,5521541,5521726,5522069,5524245,5524538,5524779,5526632,5526901,5528737,5531082,5532844,5533642,5536070,5536398,5536735,5537397,5538030,5540620,5540831,5542519,5542814,	5505136,5506920,5507338,5507549,5509249,5509470,5510045,5511231,5511527,5511730,5512145,5512326,5512621,5513024,5513359,5513630,5513883,5514083,5514426,5515910,5516202,5516806,5519480,5519772,5520123,5521636,5521990,5522348,5524440,5524628,5524908,5526809,5527070,5528850,5531223,5532973,5533795,5536247,5536581,5536933,5537559,5538168,5540752,5540969,5542645,5543065,	0	ENSDARG00000006526.12	cmpl	cmpl	0,0,1,1,1,0,1,1,1,1,1,0,1,1,1,1,1,1,1,1,1,1,1,1,0,1,1,1,1,1,1,1,0,1,1,1,1,1,1,1,1,1,1,1,1,0,
ENSDART00000126172.3	chr1	-	5506523	5509585	5509585	5509585	6	5506523,5507231,5507423,5509087,5509331,5509557,	5506920,5507338,5507549,5509249,5509470,5509585,	0	ENSDARG00000006526.12	none	none	-1,-1,-1,-1,-1,-1,
ENSDART00000144185.2	chr1	-	5509803	5511662	5511662	5511662	3	5509803,5511141,5511338,	5510045,5511231,5511662,	0	ENSDARG00000006526.12	none	none	-1,-1,-1,
ENSDART00000103754.6	chr1	-	5536337	5542565	5536685	5542565	6	5536337,5537397,5538030,5540620,5540831,5542519,	5536933,5537559,5538168,5540752,5540969,5542565,	0	ENSDARG00000006526.12	cmpl	incmpl	1,1,1,1,1,0,
ENSDART00000109756.4	chr1	+	5576150	5587575	5576220	5587130	9	5576150,5578120,5578659,5581102,5581890,5582092,5584400,5584699,5586864,	5576279,5578181,5578761,5581207,5582007,5582186,5584603,5584784,5587575,	0	ENSDARG00000077688.4	cmpl	cmpl	0,2,0,0,0,0,1,0,1,
ENSDART00000150863.3	chr1	-	5606459	5746030	5608343	5745420	17	5606459,5612995,5627418,5631336,5631799,5638711,5640980,5651178,5652874,5654424,5671658,5675357,5678597,5681037,5706972,5728508,5745347,	5608648,5613055,5627451,5631430,5632059,5638873,5641064,5651323,5653224,5654569,5671814,5675527,5678753,5681268,5707154,5728686,5746030,	0	ENSDARG00000096546.4	cmpl	cmpl	1,1,1,0,1,1,1,0,1,0,0,1,1,1,2,1,0,
ENSDART00000166779.2	chr1	-	5728349	5745420	5728504	5745420	2	5728349,5745347,	5728686,5745420,	0	ENSDARG00000096546.4	cmpl	cmpl	1,0,
ENSDART00000168117.2	chr1	-	5798547	6028876	5798745	5982466	23	5798547,5817373,5840480,5853335,5855178,5855579,5876052,5882339,5901345,5910795,5912675,5918600,5932320,5939430,5954439,5956323,5963099,5966399,5969212,5982410,5991028,6024635,6028856,	5799085,5817444,5840589,5853599,5855286,5855621,5876236,5882555,5901390,5910908,5912805,5918730,5932494,5939616,5954565,5956463,5963527,5966525,5969299,5982502,5991129,6024804,6028876,	0	ENSDARG00000092671.5	cmpl	cmpl	2,0,2,2,2,2,1,1,1,2,1,0,0,0,0,1,2,2,2,0,-1,-1,-1,
ENSDART00000138891.3	chr1	-	6068435	6085750	6068435	6085427	2	6068435,6085310,	6068537,6085750,	0	ENSDARG00000113935.1	incmpl	cmpl	0,0,
ENSDART00000092324.5	chr1	+	6135175	6158609	6137595	6158408	20	6135175,6137561,6144196,6144425,6146478,6146660,6148399,6149853,6150070,6151854,6152279,6152461,6152608,6153199,6153379,6154342,6154929,6156939,6158075,6158248,	6135334,6138111,6144334,6144615,6146571,6146853,6148521,6149963,6150136,6151980,6152356,6152525,6152694,6153257,6153484,6154517,6155042,6157034,6158144,6158609,	0	ENSDARG00000063297.5	cmpl	cmpl	-1,0,0,0,1,1,2,1,0,0,0,2,0,2,0,0,1,0,2,2,
ENSDART00000179970.1	chr1	+	6135187	6158609	6137595	6158254	20	6135187,6137561,6144196,6144425,6146478,6146660,6148399,6149853,6150070,6151854,6152279,6152461,6152608,6153199,6153379,6154342,6154929,6156939,6158075,6158247,	6135334,6138111,6144334,6144615,6146571,6146853,6148521,6149963,6150136,6151980,6152356,6152525,6152694,6153257,6153484,6154517,6155042,6157034,6158144,6158609,	0	ENSDARG00000063297.5	cmpl	cmpl	-1,0,0,0,1,1,2,1,0,0,0,2,0,2,0,0,1,0,2,2,
ENSDART00000037036.4	chr1	+	6161929	6169817	6162089	6168855	8	6161929,6162886,6165139,6165311,6166424,6166652,6167375,6168249,	6162152,6162989,6165221,6165432,6166553,6166714,6167493,6169817,	0	ENSDARG00000027078.4	cmpl	cmpl	0,0,1,2,0,0,2,0,
ENSDART00000144559.2	chr1	+	6162012	6166554	6166554	6166554	4	6162012,6162886,6165139,6166424,	6162152,6162989,6165432,6166554,	0	ENSDARG00000027078.4	none	none	-1,-1,-1,-1,
ENSDART00000188295.1	chr1	+	6162089	6172328	6162089	6168855	7	6162089,6162886,6165139,6165311,6166424,6167375,6168249,	6162152,6162989,6165221,6165432,6166714,6167493,6172328,	0	ENSDARG00000027078.4	cmpl	cmpl	0,0,1,2,0,2,0,
ENSDART00000024358.9	chr1	+	6171584	6182518	6171811	6182355	10	6171584,6173486,6173627,6175104,6175269,6176760,6177282,6178683,6179390,6182329,	6171865,6173523,6173734,6175186,6175328,6176806,6177337,6178810,6179556,6182518,	0	ENSDARG00000017537.9	cmpl	cmpl	0,0,1,0,1,0,1,2,0,1,
ENSDART00000136060.3	chr1	+	6171842	6177337	6177337	6177337	7	6171842,6173486,6173627,6175104,6175269,6176760,6177282,	6171865,6173523,6173734,6175186,6175328,6176821,6177337,	0	ENSDARG00000017537.9	none	none	-1,-1,-1,-1,-1,-1,-1,
ENSDART00000126468.3	chr1	+	6172785	6183228	6172785	6183228	10	6172785,6173627,6175104,6175269,6176760,6178683,6179390,6182193,6182329,6183111,	6172855,6173734,6175186,6175328,6176783,6178810,6179556,6182231,6182476,6183228,	0	ENSDARG00000017537.9	incmpl	cmpl	0,1,0,1,0,2,0,1,0,0,
ENSDART00000132675.2	chr1	+	6173483	6179556	6179556	6179556	8	6173483,6173627,6175104,6175269,6176760,6177282,6178683,6179390,	6173523,6173734,6175186,6175328,6176843,6177337,6178810,6179556,	0	ENSDARG00000017537.9	none	none	-1,-1,-1,-1,-1,-1,-1,-1,
ENSDART00000145809.2	chr1	+	6182341	6185532	6185532	6185532	3	6182341,6183111,6185198,	6182476,6183282,6185532,	0	ENSDARG00000017537.9	none	none	-1,-1,-1,
ENSDART00000139723.2	chr1	+	6182343	6185512	6185512	6185512	3	6182343,6183111,6185198,	6182476,6183205,6185512,	0	ENSDARG00000017537.9	none	none	-1,-1,-1,
ENSDART00000092277.6	chr1	+	6189948	6210718	6190019	6210232	9	6189948,6192902,6196181,6198982,6201916,6203232,6204050,6206924,6209534,	6190246,6193006,6196212,6199112,6202001,6203370,6204139,6207060,6210718,	0	ENSDARG00000063270.7	cmpl	cmpl	0,2,1,2,0,1,1,0,1,
ENSDART00000140936.2	chr1	+	6189996	6196763	6196763	6196763	3	6189996,6192902,6196181,	6190246,6193006,6196763,	0	ENSDARG00000063270.7	none	none	-1,-1,-1,
ENSDART00000146473.2	chr1	+	6206949	6210718	6206949	6210232	2	6206949,6209531,	6207060,6210718,	0	ENSDARG00000063270.7	incmpl	cmpl	1,1,
ENSDART00000141653.3	chr1	-	6218631	6225285	6218787	6225285	10	6218631,6218983,6220454,6220856,6221533,6221867,6222114,6224239,6224601,6225243,	6218829,6219123,6220630,6220998,6221795,6222036,6222257,6224374,6224714,6225285,	0	ENSDARG00000018008.12	cmpl	incmpl	0,1,2,1,0,2,0,0,1,1,
ENSDART00000134199.2	chr1	-	6220880	6222249	6222249	6222249	4	6220880,6221533,6221867,6222114,	6220998,6221768,6222036,6222249,	0	ENSDARG00000018008.12	none	none	-1,-1,-1,-1,
ENSDART00000131254.3	chr1	-	6221551	6225273	6225273	6225273	5	6221551,6222114,6224239,6224601,6225239,	6222036,6222257,6224374,6224714,6225273,	0	ENSDARG00000018008.12	none	none	-1,-1,-1,-1,-1,
ENSDART00000144454.2	chr1	-	6221700	6225285	6225285	6225285	4	6221700,6224239,6224601,6225243,	6222257,6224374,6224714,6225285,	0	ENSDARG00000018008.12	none	none	-1,-1,-1,-1,
ENSDART00000145378.3	chr1	+	6225492	6240518	6226107	6240518	11	6225492,6225901,6226061,6231022,6231211,6232397,6232593,6233970,6236788,6238554,6240436,	6225575,6225954,6226695,6231126,6231320,6232521,6232733,6234143,6236952,6238776,6240518,	0	ENSDARG00000074031.5	cmpl	incmpl	-1,-1,0,0,2,0,1,0,2,1,1,
ENSDART00000108816.4	chr1	+	6226134	6243978	6226134	6243978	13	6226134,6231022,6231211,6232397,6232593,6233970,6236788,6238554,6240430,6241143,6241323,6243542,6243949,	6226695,6231126,6231320,6232521,6232733,6234143,6236952,6238776,6240465,6241162,6241445,6243627,6243978,	0	ENSDARG00000074031.5	cmpl	incmpl	0,0,2,0,1,0,2,1,1,0,1,0,1,
ENSDART00000127329.3	chr1	+	6243905	6272146	6244002	6272068	18	6243905,6244235,6247080,6247990,6250253,6252750,6253224,6254709,6255004,6256890,6258852,6261395,6262794,6264893,6266188,6269033,6271616,6271945,	6244089,6244341,6247358,6248114,6250445,6252916,6253372,6254833,6255105,6257062,6259055,6261497,6262930,6265119,6266379,6269158,6271769,6272146,	0	ENSDARG00000043247.6	cmpl	cmpl	0,0,1,0,1,1,2,0,1,0,1,0,0,1,2,1,0,0,
ENSDART00000183870.1	chr1	+	6307304	6329292	6307304	6327908	5	6307304,6317523,6318063,6325053,6327717,	6307635,6317631,6318158,6325129,6329292,	0	ENSDARG00000113848.1	cmpl	cmpl	0,1,1,0,1,
ENSDART00000166620.2	chr1	+	6357058	6366066	6357058	6365419	6	6357058,6357765,6359871,6362474,6364136,6365307,	6357188,6357912,6359986,6362560,6364249,6366066,	0	ENSDARG00000063253.6	incmpl	cmpl	2,0,0,1,0,2,
ENSDART00000109356.3	chr1	-	6403550	6494384	6405420	6494155	4	6403550,6416114,6429228,6494053,	6405472,6416238,6429811,6494384,	0	ENSDARG00000073857.3	cmpl	cmpl	2,1,0,0,
ENSDART00000176163.2	chr1	-	6453403	6453519	6453519	6453519	1	6453403,	6453519,	0	ENSDARG00000107682.2	none	none	-1,
ENSDART00000147638.2	chr1	+	6640436	6646356	6640464	6646259	6	6640436,6641185,6642841,6643242,6644546,6646162,	6640575,6641346,6643055,6643346,6644684,6646356,	0	ENSDARG00000070558.7	cmpl	cmpl	0,0,2,0,2,2,
ENSDART00000144641.3	chr1	+	6646528	6662926	6648728	6662702	10	6646528,6648696,6653531,6655153,6657488,6659050,6659226,6661198,6661322,6662651,	6646741,6648846,6653561,6655219,6657556,6659121,6659284,6661231,6661385,6662926,	0	ENSDARG00000025754.10	cmpl	cmpl	-1,0,1,1,1,0,2,0,0,0,
ENSDART00000103701.5	chr1	+	6646571	6664123	6648728	6662702	11	6646571,6648404,6648696,6653531,6655153,6657488,6659050,6659226,6661198,6661322,6662651,	6646741,6648545,6648846,6653561,6655219,6657556,6659121,6659284,6661231,6661385,6664123,	0	ENSDARG00000025754.10	cmpl	cmpl	-1,-1,0,1,1,1,0,2,0,0,0,
ENSDART00000138919.2	chr1	+	6646615	6662821	6648801	6662702	9	6646615,6648696,6653531,6655153,6659050,6659226,6661198,6661322,6662651,	6646741,6648846,6653561,6655219,6659121,6659284,6661231,6661385,6662821,	0	ENSDARG00000025754.10	cmpl	cmpl	-1,0,0,0,0,2,0,0,0,
ENSDART00000152383.2	chr1	+	6665032	6668168	6668168	6668168	2	6665032,6667296,	6665080,6668168,	0	ENSDARG00000096530.2	none	none	-1,-1,
ENSDART00000189104.1	chr1	+	6787689	6787804	6787804	6787804	1	6787689,	6787804,	0	ENSDARG00000116636.1	none	none	-1,
ENSDART00000092118.6	chr1	+	6817291	6925407	6817291	6925103	26	6817291,6838007,6860404,6860994,6862923,6864718,6865053,6869666,6870445,6871193,6873009,6876097,6878397,6880681,6883829,6884542,6887876,6888102,6889023,6909677,6910559,6911933,6916846,6917064,6918625,6924261,	6817443,6838194,6860539,6861060,6863042,6864860,6865167,6869793,6870519,6871284,6873209,6876230,6878491,6880836,6883874,6884675,6887999,6888201,6889209,6909833,6910635,6912080,6916944,6917235,6918926,6925407,	0	ENSDARG00000063207.7	incmpl	cmpl	1,0,1,1,1,0,1,1,2,1,2,1,2,0,2,2,0,0,0,0,0,1,1,0,0,1,
ENSDART00000145822.3	chr1	+	6817291	6925103	6817291	6925103	28	6817291,6838007,6860404,6860998,6862923,6864718,6865053,6869666,6870445,6871193,6873009,6876097,6878397,6880681,6881023,6883829,6884542,6887876,6888102,6889023,6909677,6910559,6911933,6916846,6917064,6918625,6924261,6924837,	6817443,6838194,6860543,6861060,6863042,6864860,6865167,6869793,6870519,6871284,6873209,6876230,6878491,6880836,6881155,6883874,6884675,6887999,6888201,6889209,6909833,6910635,6912080,6916944,6917235,6918926,6924429,6925103,	0	ENSDARG00000063207.7	incmpl	cmpl	1,0,1,2,1,0,1,1,2,1,2,1,2,0,2,2,2,0,0,0,0,0,1,1,0,0,1,1,
ENSDART00000182953.1	chr1	+	6862916	6925113	6862916	6925103	22	6862916,6864718,6865053,6869666,6870445,6871193,6873009,6876097,6878397,6880681,6883829,6884542,6887876,6888102,6889023,6909677,6910559,6911933,6916846,6917064,6918625,6924261,	6863042,6864860,6865167,6869793,6870519,6871284,6873209,6876230,6878491,6880836,6883874,6884675,6887999,6888201,6889209,6909833,6910635,6912080,6916944,6917235,6918926,6925113,	0	ENSDARG00000063207.7	incmpl	cmpl	0,0,1,1,2,1,2,1,2,0,2,2,0,0,0,0,0,1,1,0,0,1,
ENSDART00000133377.3	chr1	+	6957095	6990027	6990027	6990027	3	6957095,6961626,6989919,	6957324,6961691,6990027,	0	ENSDARG00000095087.3	none	none	-1,-1,-1,
ENSDART00000152187.2	chr1	+	7063836	7063943	7063943	7063943	1	7063836,	7063943,	0	ENSDARG00000096610.2	none	none	-1,
ENSDART00000194672.1	chr1	+	7092272	7095474	7095474	7095474	3	7092272,7092465,7095434,	7092383,7092490,7095474,	0	ENSDARG00000117465.1	none	none	-1,-1,-1,
ENSDART00000194346.1	chr1	+	7092272	7115914	7115914	7115914	4	7092272,7092465,7115294,7115503,	7092383,7092490,7115426,7115914,	0	ENSDARG00000117465.1	none	none	-1,-1,-1,-1,
ENSDART00000167329.2	chr1	-	7142038	7142143	7142143	7142143	1	7142038,	7142143,	0	ENSDARG00000102217.2	none	none	-1,
ENSDART00000092114.8	chr1	+	7189855	7448084	7190272	7448084	27	7189855,7320892,7345008,7374982,7376266,7379115,7379853,7381403,7383893,7385921,7386509,7387826,7394563,7404093,7405793,7409137,7410168,7414317,7414684,7419882,7438235,7439148,7440498,7443871,7444048,7446263,7447308,	7190351,7321044,7345195,7375117,7376332,7379234,7379995,7381517,7384020,7385995,7386600,7388026,7394696,7404187,7405948,7409182,7410301,7414440,7414783,7420068,7438391,7439224,7440645,7443969,7444219,7446564,7448084,	0	ENSDARG00000090408.5	cmpl	cmpl	0,1,0,1,1,1,0,1,1,2,1,2,1,2,0,2,2,0,0,0,0,0,1,1,0,0,1,
ENSDART00000127426.3	chr1	+	7414317	7448795	7414317	7448084	10	7414317,7414684,7419882,7438235,7439148,7440498,7443871,7444048,7446263,7447308,	7414440,7414783,7420068,7438391,7439224,7440645,7443969,7444219,7446564,7448795,	0	ENSDARG00000090408.5	incmpl	cmpl	0,0,0,0,0,1,1,0,0,1,
ENSDART00000123563.3	chr1	+	7517448	7523930	7523930	7523930	4	7517448,7518591,7522406,7523256,	7517496,7518689,7522524,7523930,	0	ENSDARG00000013741.8	none	none	-1,-1,-1,-1,
ENSDART00000016139.7	chr1	+	7517453	7539716	7518602	7538707	11	7517453,7518591,7522406,7523256,7526703,7527492,7528190,7529689,7530090,7538630,7538792,	7517496,7518689,7522524,7523464,7526851,7527639,7528373,7529866,7530163,7538709,7539716,	0	ENSDARG00000013741.8	cmpl	cmpl	-1,0,0,1,2,0,0,0,0,1,-1,
ENSDART00000135112.2	chr1	+	7529852	7539716	7539716	7539716	3	7529852,7538630,7538792,	7530163,7538709,7539716,	0	ENSDARG00000013741.8	none	none	-1,-1,-1,
ENSDART00000132217.2	chr1	+	7538407	7539392	7539392	7539392	2	7538407,7538792,	7538709,7539392,	0	ENSDARG00000013741.8	none	none	-1,-1,
ENSDART00000148276.3	chr1	+	7538908	7550654	7541044	7550654	5	7538908,7540870,7541018,7546735,7550549,	7538937,7540920,7541119,7546766,7550654,	0	ENSDARG00000017441.11	cmpl	incmpl	-1,-1,0,0,1,
ENSDART00000147770.3	chr1	+	7540977	7550899	7541044	7550899	4	7540977,7546735,7550549,7550781,	7541119,7546766,7550693,7550899,	0	ENSDARG00000017441.11	cmpl	incmpl	0,0,1,1,
ENSDART00000015732.8	chr1	+	7546258	7554463	7546415	7553918	6	7546258,7546735,7550549,7550781,7553581,7553889,	7546418,7546766,7550693,7550952,7553659,7554463,	0	ENSDARG00000017441.11	cmpl	cmpl	0,0,1,1,1,1,
ENSDART00000145445.2	chr1	+	7546682	7554215	7554215	7554215	5	7546682,7550549,7550781,7553581,7553889,	7546766,7550693,7550952,7553659,7554215,	0	ENSDARG00000017441.11	none	none	-1,-1,-1,-1,-1,
ENSDART00000184465.1	chr1	+	7556964	7561222	7557003	7560669	5	7556964,7559894,7560225,7560411,7560560,	7557049,7560103,7560300,7560467,7561222,	0	ENSDARG00000037713.7	cmpl	cmpl	0,1,0,0,2,
ENSDART00000101586.6	chr1	+	7556964	7561134	7557003	7560669	5	7556964,7559897,7560225,7560411,7560560,	7557049,7560103,7560300,7560467,7561134,	0	ENSDARG00000037713.7	cmpl	cmpl	0,1,0,0,2,
ENSDART00000146682.3	chr1	+	7556976	7561071	7557003	7560669	6	7556976,7559799,7559894,7560225,7560411,7560560,	7557049,7559826,7560103,7560300,7560467,7561071,	0	ENSDARG00000037713.7	cmpl	cmpl	0,1,1,0,0,2,
ENSDART00000054925.7	chr1	+	7556976	7561221	7560034	7560669	5	7556976,7559826,7560225,7560411,7560560,	7557049,7560103,7560300,7560467,7561221,	0	ENSDARG00000037713.7	cmpl	cmpl	-1,0,0,0,2,
ENSDART00000146238.2	chr1	+	7556998	7560854	7560854	7560854	4	7556998,7559894,7560225,7560560,	7557049,7560103,7560467,7560854,	0	ENSDARG00000037713.7	none	none	-1,-1,-1,-1,
ENSDART00000140189.3	chr1	+	7557017	7561014	7560034	7560669	6	7557017,7559799,7559946,7560225,7560411,7560560,	7557049,7559874,7560103,7560300,7560467,7561014,	0	ENSDARG00000037713.7	cmpl	cmpl	-1,-1,0,0,0,2,
ENSDART00000134213.2	chr1	+	7557060	7560638	7560034	7560638	6	7557060,7559799,7559946,7560225,7560411,7560560,	7557135,7559874,7560103,7560300,7560467,7560638,	0	ENSDARG00000037713.7	cmpl	incmpl	-1,-1,0,0,0,2,
ENSDART00000103588.5	chr1	-	7562315	7570181	7563016	7570135	12	7562315,7563323,7565266,7565908,7566287,7566536,7566743,7566949,7567242,7568237,7568461,7569936,	7563241,7563587,7565343,7566067,7566429,7566659,7566822,7567148,7567381,7568392,7568599,7570181,	0	ENSDARG00000021688.8	cmpl	cmpl	0,0,1,1,0,0,2,1,0,1,1,0,
ENSDART00000009315.11	chr1	-	7574350	7603734	7574446	7581932	12	7574350,7574755,7575531,7577259,7579270,7579493,7579699,7580667,7580941,7581173,7581826,7603549,	7574671,7575004,7575608,7577418,7579412,7579616,7579778,7580866,7581080,7581328,7581964,7603734,	0	ENSDARG00000004953.10	cmpl	cmpl	0,0,1,1,0,0,2,1,0,1,0,-1,
ENSDART00000012627.6	chr1	-	7574350	7603573	7603573	7603573	12	7574350,7574755,7575531,7577259,7579270,7579493,7579699,7580667,7580941,7581173,7581826,7603535,	7574671,7575004,7575608,7577418,7579412,7579616,7579778,7580866,7581080,7581328,7581964,7603573,	0	ENSDARG00000004953.10	none	none	-1,-1,-1,-1,-1,-1,-1,-1,-1,-1,-1,-1,
ENSDART00000110696.3	chr1	-	7574446	7582859	7574446	7582775	12	7574446,7574755,7575531,7577259,7579270,7579493,7579699,7580667,7580941,7581173,7581826,7582576,	7574671,7575004,7575608,7577418,7579412,7579616,7579778,7580866,7581080,7581328,7581964,7582859,	0	ENSDARG00000004953.10	cmpl	cmpl	0,0,1,1,0,0,2,1,0,1,1,0,
ENSDART00000131454.2	chr1	-	7581168	7581987	7581987	7581987	2	7581168,7581826,	7581328,7581987,	0	ENSDARG00000004953.10	none	none	-1,-1,
ENSDART00000134989.3	chr1	-	7632118	7650072	7650072	7650072	5	7632118,7634599,7636717,7637174,7650037,	7632380,7634913,7636828,7637267,7650072,	0	ENSDARG00000074050.5	none	none	-1,-1,-1,-1,-1,
ENSDART00000085203.6	chr1	-	7634457	7659870	7634515	7659569	5	7634457,7636717,7637174,7650037,7659456,	7634913,7636828,7637267,7650327,7659870,	0	ENSDARG00000074050.5	cmpl	cmpl	1,1,1,2,0,
ENSDART00000131426.2	chr1	-	7634812	7637680	7637680	7637680	3	7634812,7636717,7637174,	7634913,7636828,7637680,	0	ENSDARG00000074050.5	none	none	-1,-1,-1,
ENSDART00000013264.7	chr1	-	7662090	7673376	7662873	7673108	4	7662090,7668042,7670336,7672773,	7663038,7668126,7670562,7673376,	0	ENSDARG00000018319.7	cmpl	cmpl	0,0,2,0,
ENSDART00000152542.2	chr1	-	7662637	7668555	7668555	7668555	2	7662637,7668042,	7663038,7668555,	0	ENSDARG00000018319.7	none	none	-1,-1,
ENSDART00000163488.2	chr1	+	7679327	7680108	7679603	7680108	1	7679327,	7680108,	0	ENSDARG00000098730.3	cmpl	incmpl	0,
ENSDART00000190070.1	chr1	+	7679327	7683372	7679603	7682897	2	7679327,7682577,	7680108,7683372,	0	ENSDARG00000098730.3	cmpl	cmpl	0,1,
ENSDART00000152199.2	chr1	-	7700022	7701837	7701837	7701837	2	7700022,7701701,	7700215,7701837,	0	ENSDARG00000096630.2	none	none	-1,-1,
ENSDART00000194774.1	chr1	-	7771556	7844362	7844362	7844362	3	7771556,7843904,7844242,	7773138,7844007,7844362,	0	ENSDARG00000117359.1	none	none	-1,-1,-1,
ENSDART00000176748.2	chr1	-	7801530	7801646	7801646	7801646	1	7801530,	7801646,	0	ENSDARG00000106375.2	none	none	-1,
ENSDART00000167126.2	chr1	-	7847786	7894255	7847942	7889644	16	7847786,7850647,7851203,7853112,7859466,7859737,7861497,7864559,7867509,7872221,7872532,7874520,7877945,7889109,7893713,7894121,	7848042,7850787,7851343,7853518,7859657,7859888,7861670,7864824,7867625,7872379,7872570,7875201,7878226,7889680,7894044,7894255,	0	ENSDARG00000079779.5	cmpl	cmpl	2,0,1,0,1,0,1,0,1,2,0,0,1,0,-1,-1,
ENSDART00000110154.5	chr1	-	7847819	7893808	7847942	7889644	15	7847819,7850647,7851203,7853112,7859466,7859737,7861497,7864559,7867509,7872221,7872532,7874520,7877945,7889109,7893713,	7848042,7850787,7851343,7853518,7859657,7859888,7861670,7864824,7867625,7872379,7872570,7875201,7878226,7889680,7893808,	0	ENSDARG00000079779.5	cmpl	cmpl	2,0,1,0,1,0,1,0,1,2,0,0,1,0,-1,
ENSDART00000145460.2	chr1	-	7889109	7894255	7889109	7889644	3	7889109,7893713,7894121,	7889680,7894044,7894255,	0	ENSDARG00000079779.5	incmpl	cmpl	0,-1,-1,
ENSDART00000147383.3	chr1	-	7908281	7912932	7908281	7912932	6	7908281,7908799,7909719,7910738,7911953,7912850,	7908485,7908869,7909821,7910813,7912114,7912932,	0	ENSDARG00000089090.6	cmpl	incmpl	0,2,2,2,0,2,
ENSDART00000177068.2	chr1	-	7908281	7917062	7908281	7917062	7	7908281,7908799,7909719,7910738,7911953,7912850,7917048,	7908485,7908869,7909821,7910813,7912114,7912932,7917062,	0	ENSDARG00000089090.6	cmpl	cmpl	0,2,2,2,0,2,0,
ENSDART00000185682.1	chr1	-	7918794	7918882	7918882	7918882	1	7918794,	7918882,	0	ENSDARG00000109652.1	none	none	-1,
ENSDART00000130915.2	chr1	-	7919479	7919567	7919567	7919567	1	7919479,	7919567,	0	ENSDARG00000115102.1	none	none	-1,
ENSDART00000180877.1	chr1	-	7920118	7920206	7920206	7920206	1	7920118,	7920206,	0	ENSDARG00000115288.1	none	none	-1,
ENSDART00000146090.2	chr1	-	7924955	7930679	7925209	7930679	7	7924955,7925451,7927339,7927609,7927843,7928945,7930548,	7925380,7925552,7927511,7927756,7928048,7928979,7930679,	0	ENSDARG00000093857.2	cmpl	incmpl	0,1,0,0,2,1,2,
ENSDART00000139774.3	chr1	-	7936269	7939514	7936269	7939514	6	7936269,7936522,7938072,7938346,7938708,7939480,	7936439,7936623,7938247,7938493,7938912,7939514,	0	ENSDARG00000095309.3	incmpl	incmpl	0,1,0,0,0,2,
ENSDART00000138187.2	chr1	-	7946841	7951002	7947088	7951002	7	7946841,7947372,7947589,7947867,7948127,7949958,7950870,	7947271,7947473,7947761,7948014,7948332,7949992,7951002,	0	ENSDARG00000095673.3	cmpl	incmpl	0,1,0,0,2,1,1,
ENSDART00000159655.2	chr1	+	7956029	7961696	7956743	7961036	1	7956029,	7961696,	0	ENSDARG00000099359.2	cmpl	cmpl	0,
ENSDART00000188909.1	chr1	-	7964275	7970653	7967811	7969614	4	7964275,7968091,7969245,7970431,	7968003,7968238,7970240,7970653,	0	ENSDARG00000092361.4	cmpl	cmpl	0,0,0,-1,
ENSDART00000141765.2	chr1	-	7968091	7975755	7968091	7975729	9	7968091,7969245,7970017,7970160,7973623,7973750,7975035,7975172,7975675,	7968238,7969444,7970051,7970240,7973657,7973845,7975063,7975275,7975755,	0	ENSDARG00000092361.4	incmpl	cmpl	0,2,1,2,1,2,1,0,0,
ENSDART00000144582.2	chr1	-	7970405	7975769	7975769	7975769	7	7970405,7970558,7973623,7973750,7975035,7975172,7975675,	7970465,7970653,7973657,7973845,7975063,7975275,7975769,	0	ENSDARG00000092361.4	none	none	-1,-1,-1,-1,-1,-1,-1,
ENSDART00000167552.2	chr1	+	7988051	7989314	7988182	7989208	1	7988051,	7989314,	0	ENSDARG00000103767.2	cmpl	cmpl	0,
ENSDART00000185901.1	chr1	-	7993631	7998493	7994567	7997555	5	7993631,7994827,7997191,7997468,7998459,	7994738,7994928,7997363,7997926,7998493,	0	ENSDARG00000075791.5	cmpl	cmpl	0,1,0,0,-1,
ENSDART00000133098.2	chr1	-	7994111	8000428	7994567	8000428	7	7994111,7994827,7997191,7997468,7997721,7998459,8000317,	7994738,7994928,7997363,7997615,7997926,7998493,8000428,	0	ENSDARG00000075791.5	cmpl	incmpl	0,1,0,0,2,1,1,
ENSDART00000177051.2	chr1	-	8001434	8012476	8004022	8012139	7	8001434,8004302,8006789,8007069,8009075,8011326,8012090,	8004202,8004403,8006961,8007216,8009280,8011360,8012476,	0	ENSDARG00000107486.2	cmpl	cmpl	0,1,0,0,2,1,0,
ENSDART00000143881.2	chr1	-	8017068	8020589	8017422	8019363	8	8017068,8017675,8017929,8018200,8018563,8019137,8019326,8020442,	8017596,8017776,8018104,8018347,8018768,8019183,8019395,8020589,	0	ENSDARG00000029720.9	cmpl	cmpl	0,1,0,0,2,1,0,-1,
ENSDART00000161938.2	chr1	-	8022319	8101495	8024026	8101178	21	8022319,8025726,8026736,8028126,8030026,8030333,8030601,8031035,8031528,8032793,8034210,8044238,8047228,8047419,8049440,8051462,8055375,8055902,8057979,8061768,8101084,	8024123,8026570,8027358,8029118,8030165,8030435,8030712,8031145,8031613,8032990,8034312,8044353,8047323,8047528,8049549,8051584,8055465,8056048,8058077,8061820,8101495,	0	ENSDARG00000100166.2	cmpl	cmpl	2,1,0,1,0,0,0,1,0,1,1,0,1,0,2,0,0,1,2,1,0,
ENSDART00000112160.4	chr1	+	8110561	8163167	8110561	8163167	15	8110561,8111008,8113362,8114978,8118063,8121263,8123494,8128630,8131395,8143789,8144009,8146177,8157315,8159943,8162970,	8110672,8111080,8113467,8115038,8118168,8121369,8123575,8128836,8131531,8143897,8144160,8146346,8157531,8160034,8163167,	0	ENSDARG00000074212.5	cmpl	cmpl	0,0,0,0,0,0,1,1,0,1,1,2,0,0,1,
ENSDART00000152192.2	chr1	+	8111008	8159970	8111008	8159970	13	8111008,8113362,8114978,8118063,8121263,8123494,8128630,8131395,8143789,8144009,8146177,8157315,8159943,	8111080,8113467,8115038,8118168,8121369,8123575,8128836,8131531,8143897,8144160,8146346,8157531,8159970,	0	ENSDARG00000074212.5	incmpl	incmpl	0,0,0,0,0,1,1,0,1,1,2,0,0,
ENSDART00000091508.6	chr1	-	8127674	8140763	8131563	8140763	5	8127674,8134095,8137945,8138164,8140304,	8131569,8135329,8138070,8138332,8140763,	0	ENSDARG00000062929.7	cmpl	cmpl	0,2,0,0,0,
ENSDART00000152295.2	chr1	-	8134943	8141135	8134943	8140763	4	8134943,8137945,8138164,8140304,	8135329,8138070,8138332,8141135,	0	ENSDARG00000062929.7	incmpl	cmpl	2,0,0,0,
ENSDART00000136654.3	chr1	-	8165339	8192418	8167634	8192152	5	8165339,8169249,8185004,8189425,8192074,	8167814,8169418,8185124,8189523,8192418,	0	ENSDARG00000022668.8	cmpl	cmpl	0,2,2,0,0,
ENSDART00000168631.2	chr1	+	8304903	8398249	8304903	8398249	33	8304903,8309654,8312161,8314825,8325781,8334061,8336179,8336656,8341246,8346767,8350253,8352775,8358777,8364441,8364606,8366932,8367201,8367404,8369301,8369497,8369855,8373229,8376056,8376322,8378935,8383183,8387523,8389007,8392116,8393115,8394503,8396045,8397946,	8304996,8309788,8312259,8314985,8326067,8334154,8336611,8336762,8341443,8346919,8350439,8352893,8358933,8364526,8364803,8366955,8367368,8367523,8369402,8369621,8369924,8373414,8376183,8376448,8379025,8383376,8387675,8389117,8392250,8393186,8394582,8396167,8398249,	0	ENSDARG00000099708.2	cmpl	cmpl	0,0,2,1,2,0,0,0,1,0,2,2,0,0,1,0,2,1,0,2,0,0,2,0,0,0,1,0,2,1,0,1,0,
ENSDART00000160440.2	chr1	+	8314825	8404005	8314825	8404005	27	8314825,8325754,8334061,8336179,8341133,8346767,8350253,8352775,8358777,8369301,8369497,8369855,8373229,8376056,8376322,8378935,8383183,8387523,8389007,8392116,8393115,8394503,8396045,8397946,8401100,8401341,8403078,	8314985,8326067,8334154,8336517,8341443,8346919,8350439,8352893,8358933,8369402,8369621,8369924,8373414,8376183,8376448,8379025,8383376,8387675,8389117,8392250,8393186,8394582,8396167,8398240,8401257,8401499,8404005,	0	ENSDARG00000099708.2	incmpl	cmpl	1,2,0,0,2,0,2,2,0,0,2,0,0,2,0,0,0,1,0,2,1,0,1,0,0,1,0,
ENSDART00000121823.4	chr1	-	8415982	8428761	8418724	8428708	4	8415982,8422421,8424634,8428606,	8418943,8422567,8424869,8428761,	0	ENSDARG00000025034.8	cmpl	cmpl	0,1,0,0,
ENSDART00000138435.2	chr1	-	8422091	8428736	8422280	8428708	3	8422091,8424634,8428606,	8422567,8424869,8428736,	0	ENSDARG00000025034.8	cmpl	cmpl	1,0,0,
ENSDART00000143547.2	chr1	+	8442070	8507230	8442070	8507230	62	8442070,8442237,8442423,8442778,8442958,8445446,8445841,8445995,8447527,8447802,8452377,8452536,8453391,8455199,8455416,8456737,8457353,8457650,8459279,8459659,8462325,8463013,8465304,8465525,8465706,8467001,8469523,8471076,8471752,8473295,8474490,8476035,8476214,8478086,8480611,8480798,8481050,8482660,8483191,8484352,8485185,8485343,8485547,8487484,8487742,8489140,8491160,8491986,8492216,8492671…	8442153,8442301,8442533,8442853,8443049,8445550,8445905,8446109,8447689,8447916,8452436,8452660,8453487,8455331,8455542,8456815,8457508,8457696,8459429,8459835,8462418,8463120,8465435,8465621,8465942,8467180,8469596,8471271,8471868,8473384,8474602,8476122,8476279,8478410,8480696,8480964,8481144,8482766,8483307,8484412,8485261,8485459,8485666,8487626,8487854,8489215,8491366,8492105,8492289,8492744…	0	ENSDARG00000078474.5	cmpl	cmpl	0,2,0,2,2,0,2,0,0,0,0,2,0,0,0,0,0,2,0,0,2,2,1,0,0,2,1,2,2,1,0,1,1,0,0,1,2,0,1,0,0,1,0,2,0,1,1,0,2,0,1,0,2,1,0,0,1,0,2,1,0,0,
ENSDART00000183730.1	chr1	+	8487455	8489295	8487524	8489268	3	8487455,8487742,8489140,	8487626,8487854,8489295,	0	ENSDARG00000078474.5	cmpl	cmpl	0,0,1,
ENSDART00000184518.1	chr1	+	8492378	8498200	8492378	8498200	5	8492378,8494690,8495449,8497915,8498074,	8492446,8494821,8495544,8497993,8498200,	0	ENSDARG00000078474.5	cmpl	cmpl	0,2,1,0,0,
ENSDART00000152547.2	chr1	-	8507003	8510066	8510066	8510066	2	8507003,8508886,	8507224,8510066,	0	ENSDARG00000096583.2	none	none	-1,-1,
ENSDART00000091683.6	chr1	+	8508752	8516595	8509115	8516461	4	8508752,8511595,8511768,8516283,	8509789,8511676,8511894,8516595,	0	ENSDARG00000063003.6	cmpl	cmpl	0,2,2,2,
ENSDART00000121439.3	chr1	+	8521322	8532007	8525231	8531137	6	8521322,8524248,8525183,8526912,8529736,8531021,	8521426,8524363,8525340,8527244,8529869,8532007,	0	ENSDARG00000002377.12	cmpl	cmpl	-1,-1,0,1,0,1,
ENSDART00000103626.5	chr1	+	8521322	8532009	8525231	8530516	5	8521322,8524248,8525183,8526912,8529736,	8521426,8524363,8525340,8527244,8532009,	0	ENSDARG00000002377.12	cmpl	cmpl	-1,-1,0,1,0,
ENSDART00000141283.2	chr1	+	8521331	8529813	8521331	8529813	5	8521331,8524208,8525183,8526912,8529736,	8521426,8524363,8525340,8527244,8529813,	0	ENSDARG00000002377.12	incmpl	incmpl	2,1,0,1,0,
ENSDART00000021504.9	chr1	+	8534697	8540050	8534994	8539643	2	8534697,8539225,	8537534,8540050,	0	ENSDARG00000015803.9	cmpl	cmpl	0,2,
ENSDART00000054981.5	chr1	-	8539670	8553295	8540085	8553069	21	8539670,8540234,8543281,8543490,8543685,8544419,8544593,8545219,8546554,8547132,8547276,8548491,8549392,8549614,8549758,8549990,8550273,8552104,8552301,8552957,8553187,	8540148,8540283,8543404,8543603,8543790,8544500,8544701,8545299,8546771,8547175,8547330,8548650,8549512,8549668,8549881,8550177,8550430,8552198,8552407,8553070,8553295,	0	ENSDARG00000037739.6	cmpl	cmpl	0,2,2,0,0,0,0,1,0,2,2,2,2,2,2,1,0,2,1,0,-1,
ENSDART00000147640.2	chr1	-	8543151	8543611	8543611	8543611	2	8543151,8543490,	8543404,8543611,	0	ENSDARG00000037739.6	none	none	-1,-1,
ENSDART00000146333.2	chr1	-	8543686	8545359	8545359	8545359	3	8543686,8544419,8544593,	8543790,8544500,8545359,	0	ENSDARG00000037739.6	none	none	-1,-1,-1,
ENSDART00000135197.2	chr1	-	8549848	8553165	8549848	8553069	6	8549848,8549990,8550273,8552104,8552301,8552957,	8549881,8550177,8550430,8552198,8552407,8553165,	0	ENSDARG00000037739.6	incmpl	cmpl	2,1,0,2,1,0,
ENSDART00000140398.2	chr1	-	8550016	8553260	8553260	8553260	6	8550016,8550273,8552104,8552301,8552912,8553187,	8550177,8550430,8552198,8552407,8553070,8553260,	0	ENSDARG00000037739.6	none	none	-1,-1,-1,-1,-1,-1,
ENSDART00000147763.2	chr1	-	8552749	8553298	8553298	8553298	2	8552749,8553187,	8553070,8553298,	0	ENSDARG00000037739.6	none	none	-1,-1,
ENSDART00000114613.4	chr1	-	8555322	8566567	8555464	8566459	8	8555322,8556990,8559261,8559715,8561978,8563718,8564048,8566003,	8555629,8557173,8559378,8560426,8562080,8563937,8564189,8566567,	0	ENSDARG00000076176.4	cmpl	cmpl	0,0,0,0,0,0,0,0,
ENSDART00000152162.2	chr1	+	8575306	8577274	8577274	8577274	4	8575306,8575796,8576498,8577175,	8575403,8575886,8576584,8577274,	0	ENSDARG00000096526.2	none	none	-1,-1,-1,-1,
ENSDART00000186329.1	chr1	+	8579196	8586066	8579196	8586066	1	8579196,	8586066,	0	ENSDARG00000113858.1	cmpl	cmpl	0,
ENSDART00000152525.2	chr1	+	8587229	8590009	8590009	8590009	6	8587229,8587625,8587997,8588714,8589156,8589444,	8587361,8587756,8588256,8588801,8589214,8590009,	0	ENSDARG00000096599.2	none	none	-1,-1,-1,-1,-1,-1,
ENSDART00000161791.2	chr1	+	8593559	8597015	8593588	8595097	2	8593559,8594543,	8593613,8597015,	0	ENSDARG00000100771.2	cmpl	cmpl	0,1,
ENSDART00000152367.3	chr1	+	8601934	8610564	8603121	8610478	11	8601934,8603119,8603848,8604113,8604345,8605225,8606537,8607460,8607829,8608168,8610323,	8602071,8603245,8603980,8604227,8604474,8605300,8606812,8607593,8608017,8608409,8610564,	0	ENSDARG00000079873.5	cmpl	cmpl	-1,0,1,1,1,1,1,0,1,0,1,
ENSDART00000192130.1	chr1	-	8615534	8618644	8618644	8618644	2	8615534,8618038,	8616371,8618644,	0	ENSDARG00000079332.5	none	none	-1,-1,
ENSDART00000152148.2	chr1	-	8616302	8625266	8625266	8625266	4	8616302,8618038,8624597,8625213,	8616371,8618355,8624914,8625266,	0	ENSDARG00000079332.5	none	none	-1,-1,-1,-1,
ENSDART00000103644.4	chr1	-	8638161	8646941	8638459	8646776	5	8638161,8639823,8642674,8646097,8646755,	8638610,8640039,8644251,8646295,8646941,	0	ENSDARG00000007443.9	cmpl	cmpl	2,2,0,0,0,
ENSDART00000054987.7	chr1	-	8649098	8652732	8649602	8651608	6	8649098,8649828,8650096,8650846,8651485,8652578,	8649746,8650010,8650535,8651086,8651610,8652732,	0	ENSDARG00000037746.7	cmpl	cmpl	0,1,0,0,0,-1,
ENSDART00000133319.3	chr1	-	8649903	8651718	8649903	8651608	4	8649903,8650096,8650846,8651485,	8650010,8650535,8651086,8651718,	0	ENSDARG00000037746.7	incmpl	cmpl	1,0,0,0,
ENSDART00000141407.3	chr1	-	8650095	8652655	8650728	8651608	5	8650095,8650713,8650846,8651485,8652578,	8650535,8650755,8651086,8651610,8652655,	0	ENSDARG00000037746.7	cmpl	cmpl	-1,0,0,0,-1,
ENSDART00000148067.2	chr1	-	8650108	8652655	8652655	8652655	4	8650108,8650846,8651456,8652578,	8650535,8650957,8651610,8652655,	0	ENSDARG00000037746.7	none	none	-1,-1,-1,-1,
ENSDART00000138324.3	chr1	-	8650195	8652648	8650195	8651608	4	8650195,8650846,8651485,8652578,	8650535,8651086,8651631,8652648,	0	ENSDARG00000037746.7	incmpl	cmpl	0,0,0,-1,
ENSDART00000135318.2	chr1	-	8650425	8652648	8652648	8652648	3	8650425,8651485,8652578,	8651086,8651610,8652648,	0	ENSDARG00000037746.7	none	none	-1,-1,-1,
ENSDART00000193041.1	chr1	-	8650712	8653385	8650728	8651608	4	8650712,8650846,8651485,8652578,	8650755,8651086,8651610,8653385,	0	ENSDARG00000037746.7	cmpl	cmpl	0,0,0,-1,
ENSDART00000054989.7	chr1	+	8662529	8670486	8662541	8668202	5	8662529,8664376,8667343,8667550,8667996,	8663370,8664533,8667465,8667721,8670486,	0	ENSDARG00000037747.7	cmpl	cmpl	0,1,2,1,1,
ENSDART00000152153.3	chr1	-	8673060	8691969	8674073	8691921	15	8673060,8674857,8675081,8678697,8678966,8679409,8682129,8682497,8684991,8685700,8686432,8688999,8689601,8689800,8691748,	8674221,8674910,8675171,8678852,8679091,8679499,8682281,8682640,8685075,8685852,8686590,8689155,8689719,8689860,8691969,	0	ENSDARG00000079361.5	cmpl	cmpl	2,0,0,1,2,2,0,1,1,2,0,0,2,2,0,
ENSDART00000025604.8	chr1	+	8694195	8702684	8694350	8701731	4	8694195,8695728,8698595,8701489,	8694546,8695812,8698871,8702684,	0	ENSDARG00000012458.8	cmpl	cmpl	0,1,1,1,
ENSDART00000152142.2	chr1	+	8694290	8699111	8699111	8699111	3	8694290,8695728,8698595,	8694546,8695812,8699111,	0	ENSDARG00000012458.8	none	none	-1,-1,-1,
ENSDART00000103652.5	chr1	-	8763428	8928841	8765984	8907430	14	8763428,8768177,8770606,8770894,8773160,8776196,8776432,8777273,8777697,8781505,8810440,8907049,8916654,8928572,	8767763,8768416,8770794,8771055,8773390,8776322,8776586,8777439,8777900,8781620,8811036,8907445,8916840,8928841,	0	ENSDARG00000070543.6	cmpl	cmpl	0,1,2,0,1,1,0,2,0,2,0,0,-1,-1,
ENSDART00000137900.3	chr1	-	8765623	8917902	8765984	8907430	14	8765623,8768177,8770606,8770894,8773160,8776196,8776432,8777273,8777697,8781505,8810440,8907049,8916654,8917386,	8767763,8768416,8770794,8771055,8773390,8776322,8776586,8777439,8777900,8781620,8811036,8907445,8916840,8917902,	0	ENSDARG00000070543.6	cmpl	cmpl	0,1,2,0,1,1,0,2,0,2,0,0,-1,-1,
ENSDART00000139699.2	chr1	+	8950873	8963796	8963796	8963796	3	8950873,8958569,8963140,	8950936,8958715,8963796,	0	ENSDARG00000094298.2	none	none	-1,-1,-1,
ENSDART00000136198.2	chr1	-	8962623	8966046	8962888	8963470	2	8962623,8965976,	8963517,8966046,	0	ENSDARG00000089873.4	cmpl	cmpl	0,-1,
ENSDART00000188035.1	chr1	-	8962852	8963484	8962888	8963470	1	8962852,	8963484,	0	ENSDARG00000089873.4	cmpl	cmpl	0,
ENSDART00000133496.2	chr1	-	8974499	8977963	8977963	8977963	4	8974499,8975336,8977689,8977851,	8975196,8975429,8977760,8977963,	0	ENSDARG00000093438.2	none	none	-1,-1,-1,-1,
ENSDART00000148182.2	chr1	-	8978907	8980665	8979289	8980565	2	8978907,8980412,	8979301,8980665,	0	ENSDARG00000094206.2	cmpl	cmpl	0,0,
ENSDART00000122568.4	chr1	+	8984067	8988504	8984067	8988504	2	8984067,8986136,	8984156,8988504,	0	ENSDARG00000037758.6	cmpl	cmpl	0,2,
ENSDART00000055006.3	chr1	+	8986137	8988504	8986137	8988504	1	8986137,	8988504,	0	ENSDARG00000037758.6	cmpl	cmpl	0,
ENSDART00000006211.9	chr1	+	9004718	9064912	9004846	9064566	17	9004718,9005492,9028917,9032467,9038602,9044484,9044714,9046824,9047855,9051068,9051324,9052201,9053978,9056012,9056659,9056838,9064410,	9005007,9005524,9029000,9032579,9038731,9044641,9044849,9046921,9048002,9051242,9051416,9052264,9054117,9056093,9056767,9056979,9064912,	0	ENSDARG00000008723.9	cmpl	cmpl	0,2,1,0,1,1,2,2,0,0,0,2,2,0,0,0,0,
ENSDART00000137211.2	chr1	+	9004751	9044347	9004846	9043818	6	9004751,9005492,9028917,9032467,9038602,9043804,	9005007,9005524,9029000,9032579,9038731,9044347,	0	ENSDARG00000008723.9	cmpl	cmpl	0,2,1,0,1,1,
ENSDART00000184194.1	chr1	+	9071323	9074479	9071323	9074479	2	9071323,9074326,	9071347,9074479,	0	ENSDARG00000110570.1	incmpl	cmpl	0,0,
ENSDART00000146303.2	chr1	+	9082416	9091659	9082416	9091659	4	9082416,9086116,9087754,9091168,	9082627,9086200,9087895,9091659,	0	ENSDARG00000058460.6	cmpl	incmpl	0,1,1,1,
ENSDART00000055023.5	chr1	+	9086941	9091935	9087786	9091935	2	9086941,9091168,	9087895,9091935,	0	ENSDARG00000058460.6	cmpl	cmpl	0,1,
ENSDART00000146642.3	chr1	-	9100446	9104631	9100532	9104631	4	9100446,9100683,9103316,9104562,	9100607,9100840,9103538,9104631,	0	ENSDARG00000088975.5	cmpl	incmpl	0,2,2,2,
ENSDART00000163624.2	chr1	-	9100472	9114936	9100532	9114819	11	9100472,9100683,9103316,9104562,9104921,9106949,9107211,9109328,9109490,9113391,9114776,	9100607,9100840,9103538,9104754,9105081,9107107,9107270,9109399,9111608,9113748,9114936,	0	ENSDARG00000088975.5	cmpl	cmpl	0,2,2,2,1,2,0,1,1,1,0,
ENSDART00000147833.3	chr1	-	9105038	9109699	9105038	9109699	5	9105038,9106949,9107211,9109328,9109490,	9105081,9107107,9107270,9109399,9109699,	0	ENSDARG00000100949.2	incmpl	incmpl	1,2,0,1,2,
ENSDART00000132910.2	chr1	-	9113629	9115034	9113629	9114819	2	9113629,9114776,	9113748,9115034,	0	ENSDARG00000093053.2	incmpl	cmpl	1,0,
ENSDART00000081337.4	chr1	-	9118099	9123465	9118448	9123402	5	9118099,9118433,9121348,9121579,9123243,	9118340,9118540,9121436,9121708,9123465,	0	ENSDARG00000058463.6	cmpl	cmpl	-1,1,0,0,0,
ENSDART00000139516.3	chr1	-	9118099	9118671	9118671	9118671	2	9118099,9118433,	9118340,9118671,	0	ENSDARG00000058463.6	none	none	-1,-1,
ENSDART00000113013.4	chr1	-	9125022	9130136	9125204	9130136	8	9125022,9125587,9127329,9127919,9128120,9128405,9129485,9129721,	9125412,9125736,9127417,9128036,9128282,9128488,9129641,9130136,	0	ENSDARG00000076716.5	cmpl	incmpl	2,0,2,2,2,0,0,2,
ENSDART00000142132.2	chr1	-	9132334	9134045	9132334	9133743	5	9132334,9133039,9133319,9133704,9134000,	9132488,9133181,9133379,9133756,9134045,	0	ENSDARG00000076716.5	incmpl	cmpl	1,0,0,0,-1,
ENSDART00000046507.5	chr1	+	9144957	9145896	9145052	9145688	1	9144957,	9145896,	0	ENSDARG00000058464.4	cmpl	cmpl	0,
ENSDART00000081343.5	chr1	+	9153140	9161843	9153460	9161413	11	9153140,9154906,9155160,9155439,9156159,9156846,9157079,9157379,9158210,9158446,9161206,	9153826,9155075,9155305,9155533,9156382,9156913,9157180,9157457,9158365,9158629,9161843,	0	ENSDARG00000058471.5	cmpl	cmpl	0,0,1,2,0,1,2,1,1,0,0,
ENSDART00000139877.2	chr1	+	9154093	9155273	9155273	9155273	3	9154093,9154906,9155160,	9154149,9155075,9155273,	0	ENSDARG00000058471.5	none	none	-1,-1,-1,
ENSDART00000145524.2	chr1	+	9154992	9155521	9155521	9155521	3	9154992,9155160,9155419,	9155075,9155305,9155521,	0	ENSDARG00000058471.5	none	none	-1,-1,-1,
ENSDART00000152196.2	chr1	-	9157309	9162637	9162637	9162637	2	9157309,9162357,	9157453,9162637,	0	ENSDARG00000096584.2	none	none	-1,-1,
ENSDART00000141104.2	chr1	+	9157375	9161475	9161475	9161475	4	9157375,9158210,9158446,9161206,	9157457,9158365,9158629,9161475,	0	ENSDARG00000058471.5	none	none	-1,-1,-1,-1,
ENSDART00000192174.1	chr1	-	9169806	9195760	9169806	9195760	20	9169806,9172313,9172512,9174708,9175352,9177348,9177718,9179905,9181805,9183362,9183621,9183878,9184108,9185003,9186508,9186689,9187951,9188103,9191877,9195724,	9169977,9172381,9172636,9174820,9175504,9177548,9177818,9180095,9181928,9183501,9183783,9184032,9184187,9185271,9186613,9186812,9188024,9188176,9192047,9195760,	0	ENSDARG00000058475.6	cmpl	incmpl	0,1,0,2,0,1,0,2,2,1,1,0,2,1,1,1,0,2,0,0,
ENSDART00000143587.2	chr1	-	9169806	9195629	9169806	9195629	22	9169806,9172313,9172512,9174708,9175356,9177348,9177718,9179905,9181805,9182234,9183382,9183655,9183878,9184108,9185003,9186508,9186689,9187951,9188103,9189645,9191905,9195570,	9169977,9172381,9172636,9174836,9175504,9177548,9177818,9180095,9181896,9182454,9183511,9183783,9184032,9184187,9185271,9186613,9186812,9188024,9188176,9189679,9192023,9195629,	0	ENSDARG00000058475.6	cmpl	incmpl	0,1,0,1,0,1,0,2,1,0,0,1,0,2,1,1,1,0,2,1,0,1,
ENSDART00000118295.2	chr1	-	9197858	9197966	9197966	9197966	1	9197858,	9197966,	0	ENSDARG00000080404.2	none	none	-1,
ENSDART00000092058.6	chr1	+	9199030	9227204	9199155	9226963	22	9199030,9201501,9203064,9203273,9203589,9205657,9205787,9206460,9207287,9207472,9207682,9209492,9209676,9209846,9211320,9214488,9216360,9218037,9222701,9223672,9225442,9226832,	9199243,9201669,9203185,9203499,9203682,9205710,9205926,9206673,9207385,9207596,9207822,9209586,9209775,9209977,9211444,9214713,9216510,9218168,9222846,9223789,9225506,9227204,	0	ENSDARG00000058480.9	cmpl	cmpl	0,1,1,2,0,0,2,0,0,2,0,2,0,0,2,0,0,0,2,0,0,1,
ENSDART00000182771.1	chr1	+	9199148	9206616	9199155	9206616	8	9199148,9201501,9203064,9203273,9203589,9205657,9205787,9206460,	9199243,9201669,9203185,9203499,9203682,9205710,9205926,9206616,	0	ENSDARG00000058480.9	cmpl	incmpl	0,1,1,2,0,0,2,0,
ENSDART00000143336.2	chr1	+	9218647	9221616	9221616	9221616	2	9218647,9221007,	9218780,9221616,	0	ENSDARG00000058480.9	none	none	-1,-1,
ENSDART00000147277.3	chr1	-	9227080	9228007	9227291	9227776	3	9227080,9227678,9227903,	9227397,9227830,9228007,	0	ENSDARG00000024740.6	cmpl	cmpl	2,0,-1,
ENSDART00000135219.2	chr1	-	9227084	9228007	9227291	9227776	3	9227084,9227678,9227903,	9227397,9227776,9228007,	0	ENSDARG00000024740.6	cmpl	cmpl	2,0,-1,
ENSDART00000190360.1	chr1	-	9227239	9227804	9227291	9227776	2	9227239,9227678,	9227397,9227804,	0	ENSDARG00000024740.6	cmpl	cmpl	2,0,
ENSDART00000166515.2	chr1	-	9230243	9231952	9230980	9231841	1	9230243,	9231952,	0	ENSDARG00000101597.2	cmpl	cmpl	0,
ENSDART00000055011.7	chr1	-	9234927	9249943	9235040	9249893	11	9234927,9235301,9237465,9238230,9241170,9243626,9243835,9244498,9246214,9247006,9249727,	9235103,9235391,9237647,9238351,9241368,9243752,9243943,9244636,9246348,9247213,9249943,	0	ENSDARG00000058445.6	cmpl	cmpl	0,0,1,0,0,0,0,0,1,1,0,
ENSDART00000146065.4	chr1	-	9258930	9277986	9258930	9276389	15	9258930,9261827,9262317,9263310,9265457,9265787,9265990,9270077,9270870,9272923,9273875,9276087,9276338,9277167,9277782,	9258962,9262226,9262357,9263361,9265601,9265901,9266109,9270207,9270941,9273365,9273973,9276225,9276450,9277266,9277986,	0	ENSDARG00000063169.8	incmpl	cmpl	0,0,2,2,2,2,0,2,0,2,0,0,0,-1,-1,
ENSDART00000114876.5	chr1	-	9270014	9277986	9270059	9276389	8	9270014,9270870,9272923,9273875,9276087,9276338,9277167,9277782,	9270207,9270941,9273365,9273973,9276225,9276450,9277266,9277986,	0	ENSDARG00000063169.8	cmpl	cmpl	2,0,2,0,0,0,-1,-1,
ENSDART00000132812.2	chr1	-	9273207	9278037	9273207	9276389	6	9273207,9273875,9276087,9276338,9277167,9277782,	9273365,9273973,9276225,9276437,9277266,9278037,	0	ENSDARG00000063169.8	incmpl	cmpl	2,0,0,0,-1,-1,
ENSDART00000142384.2	chr1	+	9277845	9285351	9285351	9285351	3	9277845,9278069,9285020,	9277955,9278153,9285351,	0	ENSDARG00000092791.2	none	none	-1,-1,-1,
ENSDART00000055009.6	chr1	+	9290102	9294115	9290261	9293785	3	9290102,9291204,9292810,	9290523,9291380,9294115,	0	ENSDARG00000037760.6	cmpl	cmpl	0,1,0,
ENSDART00000194963.1	chr1	-	9308270	9314795	9314795	9314795	2	9308270,9314563,	9309210,9314795,	0	ENSDARG00000117314.1	none	none	-1,-1,
ENSDART00000194788.1	chr1	-	9314507	9321931	9321931	9321931	2	9314507,9321833,	9314639,9321931,	0	ENSDARG00000117314.1	none	none	-1,-1,
ENSDART00000137821.4	chr1	-	9459759	9486214	9460911	9485910	17	9459759,9464193,9464921,9465867,9466044,9467165,9467570,9469636,9470300,9472007,9474123,9475419,9476136,9477527,9478998,9483760,9485767,	9460994,9464240,9465036,9465941,9466147,9467283,9467629,9469803,9470352,9472174,9474450,9475845,9476267,9477676,9479140,9483809,9486214,	0	ENSDARG00000017834.12	cmpl	cmpl	1,2,1,2,1,0,1,2,1,2,2,2,0,1,0,2,0,
ENSDART00000008682.10	chr1	-	9460009	9486080	9469995	9485910	19	9460009,9464193,9464921,9465867,9466044,9467165,9467570,9469636,9469888,9470300,9472007,9474123,9475419,9476136,9477527,9478998,9483760,9485767,9486046,	9460994,9464240,9465036,9465941,9466147,9467283,9467629,9469803,9470098,9470352,9472174,9474450,9475845,9476267,9477676,9479140,9483809,9485965,9486080,	0	ENSDARG00000017834.12	cmpl	cmpl	-1,-1,-1,-1,-1,-1,-1,-1,2,1,2,2,2,0,1,0,2,0,-1,
ENSDART00000157814.2	chr1	-	9469909	9485939	9469995	9485910	10	9469909,9470300,9472007,9474123,9475419,9476136,9477527,9478998,9483760,9485767,	9470098,9470352,9472174,9474450,9475845,9476267,9477676,9479140,9483809,9485939,	0	ENSDARG00000017834.12	cmpl	cmpl	2,1,2,2,2,0,1,0,2,0,
ENSDART00000110790.4	chr1	-	9499644	9527200	9501378	9523559	20	9499644,9503727,9505422,9508091,9508287,9508683,9510447,9510967,9512243,9512445,9512617,9514037,9515397,9516817,9517013,9519921,9520398,9520704,9522947,9526993,	9501441,9503874,9505587,9508190,9508429,9508832,9510599,9511101,9512361,9512530,9512731,9514148,9515529,9516936,9517133,9520018,9520564,9520850,9523568,9527200,	0	ENSDARG00000074282.4	cmpl	cmpl	0,0,0,0,2,0,1,2,1,0,0,0,0,1,1,0,2,0,0,-1,
ENSDART00000111131.4	chr1	+	9557211	9712302	9708800	9711245	4	9557211,9618171,9674267,9708463,	9557481,9618272,9674339,9712302,	0	ENSDARG00000074372.4	cmpl	cmpl	-1,-1,-1,0,
ENSDART00000166601.2	chr1	-	9626276	9629705	9627554	9627917	3	9626276,9628463,9629642,	9627922,9628555,9629705,	0	ENSDARG00000104203.2	cmpl	cmpl	0,-1,-1,
ENSDART00000164079.2	chr1	-	9627239	9629724	9627554	9629649	2	9627239,9629642,	9627922,9629724,	0	ENSDARG00000104203.2	cmpl	cmpl	1,0,
ENSDART00000161164.2	chr1	-	9629160	9644662	9629531	9644624	2	9629160,9643065,	9629568,9644662,	0	ENSDARG00000101495.2	cmpl	cmpl	2,0,
ENSDART00000080323.6	chr1	-	9630995	9652696	9631472	9633068	4	9630995,9640348,9641640,9652500,	9633073,9640379,9641663,9652696,	0	ENSDARG00000091916.5	cmpl	cmpl	0,-1,-1,-1,
ENSDART00000121490.3	chr1	-	9631363	9641845	9631472	9633068	4	9631363,9640348,9641640,9641808,	9633073,9640379,9641663,9641845,	0	ENSDARG00000091916.5	cmpl	cmpl	0,-1,-1,-1,
ENSDART00000127735.3	chr1	-	9631363	9652547	9631472	9633068	4	9631363,9640348,9647006,9652500,	9633073,9640379,9647045,9652547,	0	ENSDARG00000091916.5	cmpl	cmpl	0,-1,-1,-1,
ENSDART00000160474.2	chr1	-	9631377	9652547	9631472	9633068	5	9631377,9640348,9641640,9648709,9652500,	9633073,9640379,9641663,9649073,9652547,	0	ENSDARG00000091916.5	cmpl	cmpl	0,-1,-1,-1,-1,
ENSDART00000126996.3	chr1	-	9635977	9652725	9636140	9637745	4	9635977,9640348,9641640,9652500,	9637750,9640379,9641663,9652725,	0	ENSDARG00000099276.2	cmpl	cmpl	0,-1,-1,-1,
ENSDART00000159411.2	chr1	-	9637120	9641861	9637120	9637745	4	9637120,9640348,9641640,9641808,	9637750,9640379,9641663,9641861,	0	ENSDARG00000099276.2	incmpl	cmpl	0,-1,-1,-1,
ENSDART00000016750.10	chr1	-	9642845	9652547	9643028	9644624	2	9642845,9652500,	9644629,9652547,	0	ENSDARG00000101495.2	cmpl	cmpl	0,-1,
ENSDART00000123725.2	chr1	-	9642975	9644630	9643028	9644624	1	9642975,	9644630,	0	ENSDARG00000101495.2	cmpl	cmpl	0,
ENSDART00000123773.3	chr1	-	9645274	9652725	9645363	9646959	3	9645274,9648709,9652500,	9646964,9649073,9652725,	0	ENSDARG00000104995.2	cmpl	cmpl	0,-1,-1,
ENSDART00000126877.3	chr1	-	9645274	9652725	9645363	9646959	2	9645274,9652500,	9646964,9652725,	0	ENSDARG00000104995.2	cmpl	cmpl	0,-1,
ENSDART00000189621.1	chr1	+	9708800	9711245	9708800	9711245	1	9708800,	9711245,	0	ENSDARG00000074372.4	cmpl	cmpl	0,
ENSDART00000147904.3	chr1	-	9739369	9858508	9741164	9856264	18	9739369,9784180,9793155,9804680,9808296,9808663,9813508,9820983,9833793,9847962,9850901,9851096,9851400,9852554,9853645,9855886,9856117,9858429,	9741326,9784371,9793360,9804771,9808388,9808720,9813649,9821128,9833880,9848024,9851016,9851227,9851482,9852679,9853825,9856027,9856278,9858508,	0	ENSDARG00000033852.10	cmpl	cmpl	0,1,0,2,0,0,0,2,2,0,2,0,2,0,0,0,0,-1,
ENSDART00000138592.2	chr1	-	9740801	9816875	9816875	9816875	3	9740801,9813605,9816801,	9741191,9813649,9816875,	0	ENSDARG00000033852.10	none	none	-1,-1,-1,
ENSDART00000054848.5	chr1	+	9860380	9866856	9860673	9866508	8	9860380,9863083,9863273,9863431,9865342,9865534,9865871,9866403,	9860748,9863195,9863350,9863523,9865442,9865610,9865987,9866856,	0	ENSDARG00000037654.5	cmpl	cmpl	0,0,1,0,2,0,1,0,
ENSDART00000138630.3	chr1	-	9873294	9885326	9873510	9883491	9	9873294,9873726,9874897,9875030,9877296,9879907,9880308,9883293,9885229,	9873657,9873808,9874937,9875232,9877598,9880073,9880530,9883545,9885326,	0	ENSDARG00000037652.8	cmpl	cmpl	0,2,1,0,1,0,0,0,-1,
ENSDART00000054843.7	chr1	-	9873314	9885320	9873510	9883491	8	9873314,9874897,9875030,9877296,9879907,9880308,9883293,9885229,	9873808,9874937,9875232,9877598,9880073,9880530,9883545,9885320,	0	ENSDARG00000037652.8	cmpl	cmpl	2,1,0,1,0,0,0,-1,
ENSDART00000135702.3	chr1	+	9886990	9914239	9887026	9914239	17	9886990,9889035,9891037,9893545,9893741,9893919,9896099,9897625,9900379,9900738,9904717,9904993,9906468,9909802,9912212,9912921,9914106,	9887089,9889132,9891088,9893652,9893793,9893978,9896176,9897707,9900445,9900762,9904779,9905107,9906584,9909890,9912351,9913004,9914239,	0	ENSDARG00000037646.9	cmpl	incmpl	0,0,1,1,0,1,0,2,0,0,0,2,2,1,2,0,2,
ENSDART00000054833.6	chr1	+	9886996	9914630	9887026	9912943	16	9886996,9889035,9891037,9893545,9893741,9893919,9896099,9897625,9900379,9900738,9904717,9904993,9906468,9909802,9912921,9914106,	9887089,9889132,9891088,9893652,9893793,9893978,9896176,9897707,9900445,9900762,9904779,9905107,9906584,9909890,9913004,9914630,	0	ENSDARG00000037646.9	cmpl	cmpl	0,0,1,1,0,1,0,2,0,0,0,2,2,1,2,-1,
ENSDART00000138726.2	chr1	-	9919908	9940494	9920079	9940410	12	9919908,9920612,9926719,9928205,9928481,9930328,9930539,9931812,9933496,9934497,9936796,9940303,	9920373,9920729,9926866,9928384,9928621,9930446,9930633,9932096,9933759,9934622,9937007,9940494,	0	ENSDARG00000032795.7	cmpl	cmpl	0,0,0,1,2,1,0,1,2,0,2,0,
ENSDART00000005895.8	chr1	+	9954488	9964765	9954532	9964632	11	9954488,9958321,9958620,9959646,9961055,9961309,9961524,9961804,9962325,9964297,9964566,	9954773,9958528,9958754,9959784,9961172,9961435,9961722,9961925,9962507,9964435,9964765,	0	ENSDARG00000018263.9	cmpl	cmpl	0,1,1,0,0,0,0,0,1,0,0,
ENSDART00000183003.1	chr1	+	9954532	9966195	9954532	9964486	10	9954532,9958321,9958620,9959646,9961055,9961309,9961524,9961804,9962325,9964297,	9954773,9958528,9958754,9959784,9961172,9961435,9961722,9961925,9962507,9966195,	0	ENSDARG00000018263.9	cmpl	cmpl	0,1,1,0,0,0,0,0,1,0,
ENSDART00000132607.3	chr1	+	9966383	9982114	9966383	9982020	5	9966383,9969076,9969321,9981619,9981911,	9966407,9969233,9969426,9981809,9982114,	0	ENSDARG00000077542.5	incmpl	cmpl	0,0,1,1,2,
ENSDART00000142906.2	chr1	-	9972564	9980765	9975812	9980765	5	9972564,9975801,9977439,9979454,9980708,	9973130,9975894,9977616,9979554,9980765,	0	ENSDARG00000070490.6	cmpl	incmpl	-1,2,2,1,1,
ENSDART00000144233.2	chr1	-	9972695	9980770	9980770	9980770	4	9972695,9975801,9979454,9980708,	9973130,9975894,9979554,9980770,	0	ENSDARG00000070490.6	none	none	-1,-1,-1,-1,
ENSDART00000136257.2	chr1	-	9979293	9980810	9980810	9980810	2	9979293,9980708,	9979554,9980810,	0	ENSDARG00000070490.6	none	none	-1,-1,
ENSDART00000144565.2	chr1	-	9986674	9988840	9986674	9988840	4	9986674,9986877,9988412,9988635,	9986775,9987049,9988559,9988840,	0	ENSDARG00000015678.10	incmpl	incmpl	1,0,0,2,
ENSDART00000143719.3	chr1	+	9994810	10000361	9994933	10000213	6	9994810,9994921,9996344,9998192,9999939,10000133,	9994844,9994994,9996442,9998327,10000051,10000361,	0	ENSDARG00000079043.5	cmpl	cmpl	-1,0,1,0,0,1,
ENSDART00000110749.4	chr1	+	9994812	10000376	9994933	10000213	5	9994812,9996344,9998192,9999939,10000133,	9994994,9996442,9998327,10000051,10000376,	0	ENSDARG00000079043.5	cmpl	cmpl	0,1,0,0,1,
ENSDART00000162675.2	chr1	+	10003192	10032308	10018527	10032308	12	10003192,10015992,10018474,10020341,10020946,10023181,10026577,10027087,10029172,10029475,10029868,10032155,	10003553,10016155,10018635,10020493,10021127,10023944,10026681,10027255,10029341,10029546,10030009,10032308,	0	ENSDARG00000076174.5	cmpl	cmpl	-1,-1,0,0,2,0,1,0,0,1,0,0,
ENSDART00000113551.4	chr1	+	10018465	10033113	10018527	10032308	10	10018465,10020341,10020946,10023181,10026577,10027087,10029172,10029475,10029868,10032155,	10018635,10020493,10021127,10023944,10026681,10027255,10029341,10029546,10030009,10033113,	0	ENSDARG00000076174.5	cmpl	cmpl	0,0,2,0,1,0,0,1,0,0,
ENSDART00000190227.1	chr1	+	10019652	10032308	10020326	10032308	9	10019652,10020946,10023181,10026577,10027087,10029172,10029475,10029868,10032155,	10020493,10021127,10023944,10026681,10027255,10029341,10029546,10030009,10032308,	0	ENSDARG00000076174.5	cmpl	cmpl	0,2,0,1,0,0,1,0,0,
ENSDART00000054835.7	chr1	-	10037443	10048514	10037919	10046146	10	10037443,10039807,10040143,10040679,10041565,10041824,10044312,10046123,10047450,10048392,	10038040,10039909,10040277,10040800,10041673,10041979,10044454,10046161,10047487,10048514,	0	ENSDARG00000037647.8	cmpl	cmpl	2,2,0,2,2,0,2,0,-1,-1,
ENSDART00000125358.3	chr1	-	10037443	10048514	10037919	10048413	9	10037443,10039807,10040143,10040679,10041565,10041824,10044312,10046123,10048392,	10038040,10039909,10040277,10040800,10041673,10041979,10044454,10046161,10048514,	0	ENSDARG00000037647.8	cmpl	cmpl	2,2,0,2,2,0,2,0,0,
ENSDART00000011701.7	chr1	+	10051762	10059496	10051835	10059192	8	10051762,10052009,10053083,10054320,10054884,10056245,10057770,10058960,	10051907,10052024,10053287,10054504,10055226,10056368,10058056,10059496,	0	ENSDARG00000008969.12	cmpl	cmpl	0,0,0,0,1,1,1,2,
ENSDART00000134835.3	chr1	+	10051773	10054771	10054771	10054771	4	10051773,10052009,10053083,10054320,	10051907,10052024,10053287,10054771,	0	ENSDARG00000008969.12	none	none	-1,-1,-1,-1,
ENSDART00000144756.3	chr1	+	10051783	10058057	10058057	10058057	6	10051783,10052009,10053083,10054320,10054884,10057898,	10051907,10052024,10053287,10054504,10054958,10058057,	0	ENSDARG00000008969.12	none	none	-1,-1,-1,-1,-1,-1,
ENSDART00000133465.2	chr1	+	10054018	10057808	10057808	10057808	5	10054018,10054320,10054884,10056245,10057770,	10054097,10054504,10055226,10056368,10057808,	0	ENSDARG00000008969.12	none	none	-1,-1,-1,-1,-1,
ENSDART00000139358.2	chr1	+	10054407	10055303	10055303	10055303	2	10054407,10054884,	10054504,10055303,	0	ENSDARG00000008969.12	none	none	-1,-1,
ENSDART00000147106.3	chr1	-	10063500	10064568	10064568	10064568	4	10063500,10063787,10064053,10064470,	10063575,10063933,10064237,10064568,	0	ENSDARG00000020741.12	none	none	-1,-1,-1,-1,
ENSDART00000148074.2	chr1	-	10063873	10068533	10068533	10068533	5	10063873,10064053,10064511,10067715,10068467,	10063933,10064237,10064621,10068046,10068533,	0	ENSDARG00000020741.12	none	none	-1,-1,-1,-1,-1,
ENSDART00000033118.6	chr1	-	10066099	10071539	10066269	10071398	6	10066099,10067187,10068467,10069497,10070016,10071344,	10066967,10068046,10068613,10069681,10070130,10071539,	0	ENSDARG00000020741.12	cmpl	cmpl	1,0,1,0,0,0,
ENSDART00000135522.3	chr1	-	10066099	10071422	10067173	10071398	5	10066099,10068467,10069497,10070016,10071344,	10068046,10068613,10069681,10070130,10071422,	0	ENSDARG00000020741.12	cmpl	cmpl	0,1,0,0,0,
ENSDART00000135676.2	chr1	-	10066230	10071422	10071422	10071422	6	10066230,10068006,10068467,10069497,10070016,10071344,	10066358,10068046,10068613,10069681,10070130,10071422,	0	ENSDARG00000020741.12	none	none	-1,-1,-1,-1,-1,-1,
ENSDART00000134913.2	chr1	-	10066878	10071431	10071431	10071431	3	10066878,10070033,10071344,	10067462,10070130,10071431,	0	ENSDARG00000020741.12	none	none	-1,-1,-1,
ENSDART00000190194.1	chr1	+	10074342	10114016	10074690	10100959	21	10074342,10076508,10076757,10077832,10079865,10080074,10082141,10082929,10084034,10086216,10086711,10086940,10087127,10087329,10087471,10088951,10094230,10096850,10098490,10100866,10112779,	10074943,10076609,10076824,10077963,10079954,10080174,10082185,10083007,10084231,10086281,10086818,10087043,10087227,10087369,10087523,10089072,10094314,10096974,10098581,10100981,10114016,	0	ENSDARG00000104660.3	cmpl	cmpl	0,1,0,1,0,2,0,2,2,1,0,2,0,1,2,0,1,1,2,0,-1,
ENSDART00000168473.2	chr1	+	10074600	10101227	10074690	10100959	20	10074600,10076508,10076757,10077832,10079865,10080074,10082141,10082929,10084034,10086216,10086711,10086940,10087127,10087329,10087471,10088951,10094230,10096850,10098490,10100866,	10074943,10076609,10076824,10077963,10079954,10080174,10082185,10083007,10084231,10086281,10086818,10087043,10087227,10087369,10087523,10089072,10094314,10096974,10098581,10101227,	0	ENSDARG00000104660.3	cmpl	cmpl	0,1,0,1,0,2,0,2,2,1,0,2,0,1,2,0,1,1,2,0,
ENSDART00000172059.2	chr1	+	10082477	10087525	10087525	10087525	9	10082477,10082929,10084034,10086216,10086711,10086940,10087127,10087329,10087471,	10082554,10083007,10084231,10086281,10086818,10087043,10087227,10087369,10087525,	0	ENSDARG00000104660.3	none	none	-1,-1,-1,-1,-1,-1,-1,-1,-1,
ENSDART00000080576.6	chr1	+	10110202	10113235	10110202	10112932	2	10110202,10112779,	10110744,10113235,	0	ENSDARG00000096594.3	incmpl	cmpl	1,0,
ENSDART00000181437.1	chr1	+	10110216	10119029	10110216	10112932	3	10110216,10112779,10118428,	10110744,10112955,10119029,	0	ENSDARG00000096594.3	cmpl	cmpl	0,0,-1,
ENSDART00000152432.2	chr1	+	10118454	10124192	10118454	10123806	2	10118454,10123650,	10119029,10124192,	0	ENSDARG00000077652.4	incmpl	cmpl	1,0,
ENSDART00000110698.5	chr1	+	10127162	10137452	10129142	10137096	6	10127162,10129098,10130807,10131232,10133211,10136911,	10127308,10129245,10131145,10131362,10133988,10137452,	0	ENSDARG00000079452.6	cmpl	cmpl	-1,0,1,0,1,1,
ENSDART00000187740.1	chr1	+	10129098	10137776	10129103	10137096	5	10129098,10130807,10131232,10133211,10136911,	10129245,10131145,10131362,10133988,10137776,	0	ENSDARG00000079452.6	cmpl	cmpl	0,1,0,1,1,
ENSDART00000152424.3	chr1	+	10221567	10235337	10222731	10233879	5	10221567,10222672,10225695,10233549,10235206,	10221817,10223366,10225852,10233880,10235337,	0	ENSDARG00000089943.4	cmpl	cmpl	-1,0,2,0,-1,
ENSDART00000152408.2	chr1	-	10270246	10272725	10272725	10272725	2	10270246,10272565,	10270955,10272725,	0	ENSDARG00000096536.2	none	none	-1,-1,
ENSDART00000152562.2	chr1	+	10297026	10304044	10297026	10304000	8	10297026,10297344,10298553,10299787,10302309,10302492,10303507,10303922,	10297165,10297415,10298633,10299925,10302401,10302629,10303621,10304044,	0	ENSDARG00000077533.5	incmpl	cmpl	0,1,0,2,2,1,0,0,
ENSDART00000043881.7	chr1	+	10305610	10315206	10305657	10314434	9	10305610,10306890,10307200,10308806,10311331,10311481,10311717,10313100,10314342,	10305782,10306979,10307274,10308919,10311393,10311602,10311790,10313245,10315206,	0	ENSDARG00000030563.7	cmpl	cmpl	0,2,1,0,2,1,2,0,1,
ENSDART00000152779.2	chr1	+	10318076	10323272	10323272	10323272	4	10318076,10320013,10322228,10322890,	10318306,10320198,10322335,10323272,	0	ENSDARG00000026387.6	none	none	-1,-1,-1,-1,
ENSDART00000029774.6	chr1	+	10318088	10325025	10318203	10324712	7	10318088,10320013,10322228,10324033,10324233,10324378,10324568,	10318306,10320198,10322335,10324139,10324286,10324469,10325025,	0	ENSDARG00000026387.6	cmpl	cmpl	0,1,0,2,0,2,0,
ENSDART00000109141.4	chr1	-	10336680	10347198	10336680	10347198	9	10336680,10337230,10338758,10340185,10340376,10340568,10341895,10342919,10347072,	10336824,10337326,10338904,10340281,10340474,10340640,10341942,10343024,10347198,	0	ENSDARG00000070495.6	cmpl	cmpl	0,0,1,1,2,2,0,0,0,
ENSDART00000152565.2	chr1	-	10336684	10347307	10336684	10347198	9	10336684,10337230,10338758,10340166,10340376,10340568,10341899,10342919,10347072,	10336848,10337326,10338906,10340281,10340474,10340647,10341942,10343024,10347307,	0	ENSDARG00000070495.6	incmpl	cmpl	0,0,2,1,2,1,0,0,0,
ENSDART00000120166.2	chr1	+	10363719	10363851	10363851	10363851	1	10363719,	10363851,	0	ENSDARG00000084766.2	none	none	-1,
ENSDART00000103535.4	chr1	+	10378705	10496799	10378851	10496210	3	10378705,10411591,10496175,	10379282,10411704,10496799,	0	ENSDARG00000034785.9	cmpl	cmpl	0,2,1,
ENSDART00000046283.8	chr1	+	10378705	10448524	10378842	10447980	12	10378705,10411591,10422628,10432448,10432781,10436624,10437922,10439928,10440143,10442056,10442288,10447942,	10379282,10411704,10422754,10432568,10432951,10436766,10437994,10440059,10440291,10442194,10442354,10448524,	0	ENSDARG00000034785.9	cmpl	cmpl	0,2,1,1,1,0,1,1,0,1,1,1,
ENSDART00000132076.3	chr1	+	10378705	10496809	10378842	10496253	3	10378705,10411591,10496175,	10379282,10411706,10496809,	0	ENSDARG00000034785.9	cmpl	cmpl	0,2,0,
ENSDART00000040116.8	chr1	-	10462691	10473630	10463399	10473510	6	10462691,10467401,10470102,10471094,10472666,10473410,	10463665,10467519,10470225,10471191,10472793,10473630,	0	ENSDARG00000070512.5	cmpl	cmpl	1,0,0,2,1,0,
ENSDART00000186876.1	chr1	-	10486092	10578013	10486881	10578003	10	10486092,10489551,10489862,10496131,10498273,10509962,10517454,10519364,10562989,10577550,	10487757,10489641,10489904,10496344,10498469,10510285,10517594,10519701,10563511,10578013,	0	ENSDARG00000070504.6	cmpl	cmpl	0,0,0,0,2,0,1,0,0,0,
ENSDART00000179237.2	chr1	-	10486092	10577945	10486881	10577937	10	10486092,10489551,10489862,10496131,10498273,10509962,10517454,10519364,10562989,10577550,	10487757,10489641,10489904,10496344,10498469,10510285,10517594,10519701,10563511,10577945,	0	ENSDARG00000070504.6	cmpl	cmpl	0,0,0,0,2,0,1,0,0,0,
ENSDART00000040502.7	chr1	-	10486793	10577945	10486881	10577928	10	10486793,10489551,10489862,10496131,10498273,10509962,10517454,10519364,10562989,10577550,	10487757,10489641,10489904,10496344,10498469,10510285,10517594,10519701,10563511,10577945,	0	ENSDARG00000070504.6	cmpl	cmpl	0,0,0,0,2,0,1,0,0,0,
ENSDART00000131294.3	chr1	-	10486881	10620345	10486881	10577937	12	10486881,10489551,10489862,10496119,10498273,10509962,10517454,10519364,10562989,10577550,10619976,10620230,	10487757,10489641,10489904,10496344,10498469,10510285,10517594,10519701,10563511,10577945,10620153,10620345,	0	ENSDARG00000070504.6	cmpl	cmpl	0,0,0,0,2,0,1,0,0,0,-1,-1,
ENSDART00000140495.2	chr1	-	10509576	10620345	10509958	10577937	7	10509576,10517454,10519364,10562989,10577550,10619976,10620230,	10510285,10517594,10519701,10563511,10577945,10620153,10620345,	0	ENSDARG00000070504.6	cmpl	cmpl	0,1,0,0,0,-1,-1,
ENSDART00000139060.2	chr1	-	10619815	10620459	10620459	10620459	2	10619815,10620230,	10620153,10620459,	0	ENSDARG00000070504.6	none	none	-1,-1,
ENSDART00000103550.4	chr1	-	10636063	10640748	10637716	10640617	3	10636063,10637914,10640544,	10637820,10638244,10640748,	0	ENSDARG00000062057.5	cmpl	cmpl	1,1,0,
ENSDART00000190904.1	chr1	-	10642321	10647484	10645219	10647305	3	10642321,10646840,10647265,	10645554,10647173,10647484,	0	ENSDARG00000067992.6	cmpl	cmpl	1,1,0,
ENSDART00000188958.1	chr1	-	10642321	10647484	10645219	10647219	2	10642321,10646840,	10645554,10647484,	0	ENSDARG00000067992.6	cmpl	cmpl	1,0,
ENSDART00000164541.2	chr1	-	10642321	10647484	10643487	10647219	3	10642321,10645248,10646840,	10643636,10645554,10647484,	0	ENSDARG00000067992.6	cmpl	cmpl	1,1,0,
ENSDART00000103548.5	chr1	-	10643540	10647307	10643540	10647307	4	10643540,10645248,10646840,10647265,	10643636,10645554,10647173,10647307,	0	ENSDARG00000067992.6	incmpl	incmpl	1,1,1,1,
ENSDART00000163201.2	chr1	+	10662311	10663525	10663525	10663525	2	10662311,10663045,	10662372,10663525,	0	ENSDARG00000103508.2	none	none	-1,-1,
ENSDART00000152421.2	chr1	-	10667446	10669436	10667446	10669436	3	10667446,10667728,10669072,	10667542,10668034,10669436,	0	ENSDARG00000070502.5	incmpl	incmpl	1,1,0,
ENSDART00000152189.2	chr1	-	10672842	10682149	10682149	10682149	5	10672842,10675576,10675866,10680505,10681986,	10673164,10675675,10676166,10680841,10682149,	0	ENSDARG00000096564.3	none	none	-1,-1,-1,-1,-1,
ENSDART00000054879.6	chr1	+	10683842	10696603	10684041	10696332	5	10683842,10687600,10688719,10692010,10696283,	10684189,10687641,10688804,10692122,10696603,	0	ENSDARG00000037679.6	cmpl	cmpl	0,1,0,1,2,
ENSDART00000152438.2	chr1	+	10683994	10696328	10696328	10696328	3	10683994,10692010,10696283,	10684189,10692122,10696328,	0	ENSDARG00000037679.6	none	none	-1,-1,-1,
ENSDART00000139387.2	chr1	+	10720293	10739221	10720293	10737894	6	10720293,10724198,10727758,10736017,10736408,10737633,	10720430,10724327,10727914,10736202,10736492,10739221,	0	ENSDARG00000076833.5	incmpl	cmpl	2,1,1,1,0,0,
ENSDART00000027050.8	chr1	+	10771456	10776547	10771456	10776547	5	10771456,10771644,10771921,10773451,10775156,	10771539,10771845,10772023,10773558,10776547,	0	ENSDARG00000012297.9	incmpl	cmpl	0,2,2,2,1,
ENSDART00000137185.3	chr1	+	10771473	10776547	10771473	10776547	5	10771473,10771629,10771921,10773451,10775156,	10771539,10771845,10772023,10773558,10776547,	0	ENSDARG00000012297.9	incmpl	cmpl	2,2,2,2,1,
ENSDART00000139749.2	chr1	-	10783669	10806625	10783731	10805772	24	10783669,10786894,10787091,10787246,10787594,10789246,10789502,10790079,10790354,10791788,10792051,10794260,10794426,10795994,10798880,10799661,10801867,10802497,10803640,10803828,10804999,10805408,10805642,10806580,	10783825,10787005,10787172,10787347,10787750,10789417,10789610,10790160,10790452,10791879,10792147,10794344,10794514,10796097,10799010,10799779,10802027,10802601,10803741,10803924,10805086,10805509,10805808,10806625,	0	ENSDARG00000087107.4	cmpl	cmpl	2,2,2,0,0,0,0,0,1,0,0,0,2,1,0,2,1,2,0,0,0,1,0,-1,
ENSDART00000167452.2	chr1	-	10809603	10821584	10809736	10821534	8	10809603,10811457,10811841,10814207,10814471,10815333,10819136,10821521,	10810093,10811531,10812001,10814362,10814644,10815451,10819214,10821584,	0	ENSDARG00000099342.2	cmpl	cmpl	0,1,0,1,2,1,1,0,
ENSDART00000162137.2	chr1	-	10814207	10821584	10814207	10821534	5	10814207,10814471,10815333,10819136,10821521,	10814362,10814644,10815451,10819214,10821584,	0	ENSDARG00000099342.2	incmpl	cmpl	1,2,1,1,0,
ENSDART00000170290.2	chr1	-	10824350	11075405	10824750	11075275	78	10824350,10828538,10834721,10841130,10847613,10849882,10853277,10855931,10858746,10858999,10861196,10863606,10866162,10873155,10875543,10877979,10893298,10893572,10897273,10900901,10901257,10904134,10905739,10912099,10914089,10914318,10916149,10918051,10918314,10918593,10925962,10928739,10930083,10930388,10930838,10932523,10932898,10934694,10935037,10941016,10943215,10944843,10946492,10948192,109…	10824848,10828631,10834842,10841374,10847772,10849948,10853343,10855970,10858883,10859111,10861363,10863764,10866248,10873357,10875618,10878041,10893359,10893648,10897420,10901170,10901375,10904291,10905912,10912289,10914244,10914530,10916267,10918218,10918396,10918674,10926112,10928871,10930231,10930564,10930962,10932669,10933009,10934865,10935190,10941151,10943332,10945014,10946615,10948372,109…	0	ENSDARG00000008487.12	cmpl	cmpl	1,1,0,2,2,2,2,2,0,2,0,1,2,1,1,2,1,0,0,1,0,2,0,2,0,1,0,1,0,0,0,0,2,0,2,0,0,0,0,0,0,0,0,0,0,0,0,0,0,0,0,0,0,0,0,0,1,0,1,0,2,0,0,0,0,0,2,0,0,0,1,2,0,0,0,0,1,0,
ENSDART00000009886.9	chr1	-	10824652	10885339	10826425	10885160	17	10824652,10826422,10828538,10834721,10841130,10847613,10849882,10853277,10858746,10858999,10861196,10863606,10866162,10873155,10875543,10877979,10885140,	10824848,10826448,10828631,10834836,10841374,10847772,10849948,10853343,10858883,10859111,10861363,10863764,10866248,10873357,10875618,10878041,10885339,	0	ENSDARG00000008487.12	cmpl	cmpl	-1,1,1,0,2,2,2,2,0,2,0,1,2,1,1,2,0,
ENSDART00000007013.10	chr1	-	10824652	10914523	10826425	10914523	26	10824652,10826422,10828538,10834721,10841130,10847613,10853277,10855931,10858746,10858999,10861196,10863606,10866162,10873155,10875543,10877979,10893298,10893572,10897273,10900901,10901257,10904134,10905739,10912099,10914089,10914318,	10824848,10826448,10828631,10834836,10841374,10847772,10853343,10855970,10858883,10859111,10861363,10863764,10866248,10873357,10875618,10878041,10893359,10893648,10897420,10901170,10901375,10904291,10905912,10912289,10914244,10914523,	0	ENSDARG00000008487.12	cmpl	incmpl	-1,1,1,0,2,2,2,2,0,2,0,1,2,1,1,2,1,0,0,1,0,2,0,2,0,2,
ENSDART00000135563.3	chr1	-	10824659	10841378	10841378	10841378	3	10824659,10828538,10841130,	10824848,10828631,10841378,	0	ENSDARG00000008487.12	none	none	-1,-1,-1,
ENSDART00000138275.2	chr1	-	10824659	10849951	10849951	10849951	6	10824659,10826422,10828538,10841130,10847613,10849882,	10824848,10826448,10828631,10841374,10847772,10849951,	0	ENSDARG00000008487.12	none	none	-1,-1,-1,-1,-1,-1,
ENSDART00000141052.3	chr1	-	10824750	10847753	10826425	10847753	6	10824750,10826422,10828538,10834721,10841130,10847613,	10824848,10826448,10828631,10834842,10841374,10847753,	0	ENSDARG00000008487.12	cmpl	incmpl	-1,1,1,0,2,0,
ENSDART00000102903.6	chr1	-	10824750	11075403	10824750	11075275	78	10824750,10828538,10834721,10841130,10847613,10849882,10853277,10855931,10858746,10858999,10861196,10863606,10866162,10873155,10875543,10877979,10893298,10893572,10897273,10900901,10901257,10904134,10905739,10912099,10914089,10914318,10916149,10918051,10918314,10918593,10925962,10928739,10930083,10930388,10930838,10932523,10932898,10934694,10935037,10941016,10943215,10944843,10946492,10948192,109…	10824848,10828631,10834842,10841374,10847772,10849948,10853343,10855970,10858883,10859111,10861363,10863764,10866248,10873357,10875618,10878041,10893359,10893648,10897420,10901170,10901375,10904291,10905912,10912289,10914244,10914530,10916267,10918218,10918396,10918674,10926112,10928871,10930231,10930564,10930962,10932669,10933081,10934865,10935190,10941151,10943332,10945014,10946615,10948372,109…	0	ENSDARG00000008487.12	cmpl	cmpl	1,1,0,2,2,2,2,2,0,2,0,1,2,1,1,2,1,0,0,1,0,2,0,2,0,1,0,1,0,0,0,0,2,0,2,0,0,0,0,0,0,0,0,0,0,0,0,0,0,0,0,0,0,0,0,0,1,0,1,0,2,0,0,0,0,0,2,0,0,0,1,2,0,0,0,0,1,0,
ENSDART00000148305.2	chr1	-	10826295	10841348	10826425	10841348	4	10826295,10828538,10834721,10841130,	10826448,10828631,10834836,10841348,	0	ENSDARG00000008487.12	cmpl	incmpl	1,1,0,1,
ENSDART00000126518.3	chr1	-	10853314	10885269	10853314	10885160	11	10853314,10855931,10858746,10858999,10861196,10863606,10866162,10873155,10875543,10877979,10885140,	10853343,10855970,10858883,10859111,10861363,10863764,10866248,10873357,10875618,10878041,10885269,	0	ENSDARG00000008487.12	incmpl	cmpl	2,2,0,2,0,1,2,1,1,2,0,
ENSDART00000120239.2	chr1	-	10870116	10870241	10870241	10870241	1	10870116,	10870241,	0	ENSDARG00000084839.2	none	none	-1,
ENSDART00000131744.2	chr1	-	10873016	10885338	10885338	10885338	4	10873016,10875543,10877979,10885140,	10873357,10875618,10878041,10885338,	0	ENSDARG00000008487.12	none	none	-1,-1,-1,-1,
ENSDART00000144095.3	chr1	-	10893321	10903886	10903886	10903886	6	10893321,10893572,10897273,10900901,10901257,10903826,	10893359,10893648,10897420,10901170,10901375,10903886,	0	ENSDARG00000008487.12	none	none	-1,-1,-1,-1,-1,-1,
ENSDART00000102923.5	chr1	-	10901065	10908621	10908621	10908621	5	10901065,10901257,10904134,10905739,10908478,	10901170,10901375,10904291,10905912,10908621,	0	ENSDARG00000008487.12	none	none	-1,-1,-1,-1,-1,
ENSDART00000166570.2	chr1	-	11062523	11062647	11062647	11062647	1	11062523,	11062647,	0	ENSDARG00000100507.2	none	none	-1,
ENSDART00000147648.3	chr1	-	11086956	11104805	11087068	11104805	23	11086956,11089457,11091539,11091827,11092044,11092203,11092846,11094134,11094251,11094435,11096917,11097143,11097341,11097533,11099716,11099890,11100150,11103881,11104111,11104287,11104453,11104609,11104776,	11087165,11089583,11091661,11091937,11092110,11092304,11092951,11094174,11094335,11094523,11097034,11097234,11097457,11097632,11099784,11099999,11103723,11103928,11104152,11104306,11104503,11104695,11104805,	0	ENSDARG00000070239.6	cmpl	incmpl	2,2,0,1,1,2,2,1,1,0,0,2,0,0,1,0,0,1,2,1,2,0,1,
ENSDART00000109858.3	chr1	+	11107687	11117930	11109555	11117479	8	11107687,11109552,11109730,11110609,11110836,11111040,11113847,11117347,	11107763,11109638,11109757,11110709,11110951,11111102,11113922,11117930,	0	ENSDARG00000074379.3	cmpl	cmpl	-1,0,2,2,0,1,0,0,
ENSDART00000141238.3	chr1	-	11124745	11372458	11125101	11372458	44	11124745,11127856,11128422,11130649,11132546,11132855,11136595,11139183,11140933,11144207,11150943,11151454,11155022,11155991,11157010,11167810,11169918,11180663,11184950,11188923,11194554,11206562,11207195,11216563,11217272,11219375,11230393,11232602,11238929,11241567,11250599,11256226,11262613,11267529,11270140,11270908,11275011,11280814,11288047,11291229,11340422,11364336,11366291,11372299,	11125371,11127986,11128543,11130787,11132711,11132981,11136757,11139321,11141120,11144323,11151038,11151515,11155089,11156062,11157114,11168012,11170113,11180762,11185140,11189039,11194792,11206713,11207314,11216685,11217464,11219468,11230589,11232718,11239111,11241708,11250747,11256363,11262787,11267632,11270308,11271025,11275209,11280898,11288238,11291344,11340556,11364484,11366398,11372458,	0	ENSDARG00000062854.7	cmpl	incmpl	0,2,1,1,1,1,1,1,0,1,2,1,0,1,2,1,1,1,0,1,0,2,0,1,1,1,0,1,2,2,1,2,2,1,1,1,1,1,2,1,2,1,2,2,
ENSDART00000091205.6	chr1	-	11125101	11291324	11125101	11291324	41	11125101,11127856,11128422,11130649,11132546,11132855,11136595,11139183,11140933,11144207,11150943,11151458,11154959,11155991,11157010,11167810,11169918,11180663,11184950,11188923,11194554,11206562,11207195,11216563,11217272,11219375,11230393,11232602,11238929,11241567,11250599,11256226,11262613,11267540,11270140,11270908,11274977,11275021,11280814,11288047,11291229,	11125371,11127986,11128543,11130787,11132711,11132981,11136757,11139321,11141120,11144323,11151045,11151515,11155089,11156062,11157114,11168012,11170113,11180762,11185140,11189039,11194792,11206713,11207314,11216685,11217464,11219474,11230589,11232718,11239111,11241708,11250747,11256363,11262804,11267632,11270308,11271081,11275006,11275209,11280898,11288238,11291324,	0	ENSDARG00000062854.7	cmpl	incmpl	0,2,1,1,1,1,1,1,0,1,1,1,0,1,2,1,1,1,0,1,0,2,0,1,1,1,0,1,2,2,1,2,0,1,1,2,0,1,1,2,0,
ENSDART00000144164.3	chr1	-	11340033	11372456	11340369	11372456	4	11340033,11364336,11366291,11372299,	11340556,11364484,11366398,11372456,	0	ENSDARG00000062854.7	cmpl	incmpl	2,1,2,1,
ENSDART00000162060.2	chr1	-	11340036	11519934	11340369	11518543	6	11340036,11364336,11366291,11372299,11518536,11519887,	11340556,11364484,11366398,11372456,11518630,11519934,	0	ENSDARG00000062854.7	cmpl	cmpl	2,1,2,1,0,-1,
ENSDART00000184803.1	chr1	+	11380496	11380611	11380611	11380611	1	11380496,	11380611,	0	ENSDARG00000112849.1	none	none	-1,
ENSDART00000188928.1	chr1	+	11469535	11469650	11469650	11469650	1	11469535,	11469650,	0	ENSDARG00000113410.1	none	none	-1,
ENSDART00000140725.2	chr1	-	11595797	11596829	11595797	11596829	1	11595797,	11596829,	0	ENSDARG00000092242.3	cmpl	cmpl	0,
ENSDART00000158253.2	chr1	-	11606009	11607062	11606009	11607062	1	11606009,	11607062,	0	ENSDARG00000092200.2	cmpl	incmpl	0,
ENSDART00000136093.2	chr1	-	11606009	11606903	11606009	11606903	1	11606009,	11606903,	0	ENSDARG00000092200.2	cmpl	incmpl	0,
ENSDART00000188891.1	chr1	-	11615272	11616295	11615272	11616295	1	11615272,	11616295,	0	ENSDARG00000093636.2	cmpl	cmpl	0,
ENSDART00000131668.2	chr1	-	11615272	11616142	11615272	11616142	1	11615272,	11616142,	0	ENSDARG00000093636.2	cmpl	incmpl	0,
ENSDART00000163312.2	chr1	-	11626251	11627289	11626251	11627289	1	11626251,	11627289,	0	ENSDARG00000095482.3	cmpl	cmpl	0,
ENSDART00000134588.2	chr1	-	11626251	11631634	11626251	11627289	2	11626251,11631544,	11627373,11631634,	0	ENSDARG00000095482.3	cmpl	cmpl	0,-1,
ENSDART00000115316.4	chr1	-	11641481	11642513	11641481	11642513	1	11641481,	11642513,	0	ENSDARG00000094981.2	cmpl	incmpl	0,
ENSDART00000139755.2	chr1	-	11641481	11642432	11641481	11642432	1	11641481,	11642432,	0	ENSDARG00000094981.2	cmpl	incmpl	0,
ENSDART00000054787.6	chr1	+	11659860	11668782	11660128	11668782	4	11659860,11663640,11664143,11668227,	11660272,11663868,11664194,11668782,	0	ENSDARG00000037619.6	cmpl	cmpl	0,0,0,0,
ENSDART00000090689.4	chr1	-	11670878	11689525	11670941	11689317	14	11670878,11675042,11675313,11680016,11680214,11681933,11682787,11682972,11683178,11685458,11687209,11687701,11689190,11689462,	11671676,11675212,11675412,11680101,11680288,11682114,11682891,11683049,11683298,11685852,11687357,11687856,11689351,11689525,	0	ENSDARG00000062585.4	cmpl	cmpl	0,1,1,0,1,0,1,2,2,1,0,1,0,-1,
ENSDART00000111041.4	chr1	+	11690359	11707665	11690359	11707665	19	11690359,11691721,11692018,11692904,11693156,11695022,11695069,11695255,11696678,11696830,11697761,11698087,11698250,11698838,11700282,11700554,11705753,11705953,11707561,	11690420,11691914,11692138,11692962,11693285,11695067,11695179,11695387,11696745,11696877,11697972,11698160,11698373,11698917,11700421,11700680,11705831,11706062,11707665,	0	ENSDARG00000074213.5	incmpl	cmpl	0,1,2,2,0,0,0,2,2,0,2,0,1,1,2,0,0,0,1,
ENSDART00000134531.2	chr1	+	11691721	11707665	11691721	11707665	17	11691721,11692018,11692904,11693156,11695021,11695255,11696678,11696830,11697761,11698087,11698250,11698838,11700282,11700554,11705753,11705953,11707561,	11691914,11692138,11692962,11693285,11695179,11695387,11696745,11696877,11697972,11698160,11698373,11698917,11700421,11700680,11705831,11706062,11707665,	0	ENSDARG00000074213.5	incmpl	cmpl	1,2,2,0,0,2,2,0,2,0,1,1,2,0,0,0,1,
ENSDART00000142045.2	chr1	+	11691747	11695168	11695168	11695168	5	11691747,11692018,11692904,11693156,11695022,	11691914,11692138,11692962,11693285,11695168,	0	ENSDARG00000074213.5	none	none	-1,-1,-1,-1,-1,
ENSDART00000147623.3	chr1	+	11711225	11733130	11711652	11733083	22	11711225,11711616,11714282,11718457,11718727,11718965,11719206,11721267,11721457,11721851,11723608,11724102,11724390,11725551,11726732,11727115,11727780,11728008,11729986,11732407,11732714,11732922,	11711531,11711694,11714363,11718568,11718815,11719102,11719332,11721360,11721559,11722004,11723731,11724259,11724553,11725729,11727003,11727237,11727911,11728096,11730165,11732529,11732822,11733130,	0	ENSDARG00000062606.7	cmpl	cmpl	-1,0,0,0,0,1,0,0,0,0,0,0,1,2,0,1,0,2,0,2,1,1,
ENSDART00000138355.3	chr1	+	11711502	11719021	11711652	11719021	6	11711502,11711599,11714282,11718457,11718727,11718965,	11711531,11711694,11714363,11718568,11718815,11719021,	0	ENSDARG00000062606.7	cmpl	incmpl	-1,0,0,0,0,1,
ENSDART00000140329.2	chr1	+	11736419	11737595	11736419	11737595	1	11736419,	11737595,	0	ENSDARG00000077198.5	cmpl	cmpl	0,
ENSDART00000033361.8	chr1	-	11781543	11850353	11785763	11849597	15	11781543,11788583,11790344,11794651,11798465,11798646,11798823,11803388,11804877,11808746,11809019,11814405,11832034,11849471,11849931,	11785937,11788659,11790524,11794788,11798558,11798739,11798879,11803464,11804950,11808842,11809240,11814517,11832204,11849618,11850353,	0	ENSDARG00000007678.11	cmpl	cmpl	0,2,2,0,0,0,1,0,2,2,0,2,0,0,-1,
ENSDART00000163971.2	chr1	-	11854709	11878845	11855742	11878424	21	11854709,11858858,11859233,11862467,11862659,11863193,11864813,11865309,11865586,11868253,11868517,11869968,11870845,11871039,11873865,11874867,11875793,11876672,11877167,11877366,11878373,	11855897,11858953,11859337,11862569,11862776,11863287,11864921,11865500,11865642,11868423,11868558,11870041,11870916,11871090,11873979,11874938,11875928,11876825,11877210,11877411,11878845,	0	ENSDARG00000089930.4	cmpl	cmpl	1,2,0,0,0,2,2,0,1,2,0,2,0,0,0,1,1,1,0,0,0,
ENSDART00000123431.3	chr1	-	11855443	11878845	11855742	11878424	21	11855443,11858858,11859233,11862467,11862659,11863193,11864813,11865309,11865586,11868253,11868517,11869968,11870845,11871039,11873865,11874867,11875793,11876672,11877167,11877366,11878373,	11855897,11858953,11859337,11862569,11862776,11863287,11864921,11865500,11865642,11868423,11868558,11870041,11870916,11871090,11873979,11874938,11875928,11876825,11877213,11877411,11878845,	0	ENSDARG00000089930.4	cmpl	cmpl	1,2,0,0,0,2,2,0,1,2,0,2,0,0,0,1,1,1,0,0,0,
ENSDART00000166981.2	chr1	+	11881558	11900420	11889177	11899590	12	11881558,11882245,11889165,11891220,11891446,11891712,11893762,11895694,11895996,11896248,11899218,11899452,	11881641,11882296,11889315,11891341,11891583,11891793,11893923,11895824,11896065,11896380,11899368,11900420,	0	ENSDARG00000078057.6	cmpl	cmpl	-1,-1,0,0,1,0,0,2,0,0,0,0,
ENSDART00000193419.1	chr1	+	11882185	11892019	11889177	11891352	3	11882185,11889165,11891220,	11882296,11889315,11892019,	0	ENSDARG00000078057.6	cmpl	cmpl	-1,0,0,
ENSDART00000159981.2	chr1	-	11902578	11973341	11911696	11973071	16	11902578,11911695,11912842,11913084,11917925,11918219,11921845,11925167,11934696,11935660,11940698,11946964,11947219,11947762,11955106,11973019,	11907812,11911876,11912980,11913222,11918134,11918309,11921883,11925358,11934837,11935724,11940791,11947065,11947297,11947875,11955202,11973341,	0	ENSDARG00000070448.8	cmpl	cmpl	-1,0,0,0,1,1,2,0,0,2,2,0,0,1,1,0,
ENSDART00000066638.7	chr1	-	11902581	11973341	11911696	11973071	17	11902581,11907719,11911695,11912842,11913084,11917925,11918219,11921845,11925167,11934696,11935660,11940698,11946964,11947219,11947762,11955106,11973019,	11903071,11907812,11911876,11912980,11913222,11918134,11918309,11921883,11925358,11934837,11935724,11940791,11947065,11947297,11947875,11955202,11973341,	0	ENSDARG00000070448.8	cmpl	cmpl	-1,-1,0,0,0,1,1,2,0,0,2,2,0,0,1,1,0,
ENSDART00000165543.2	chr1	-	11907308	11913170	11907746	11913170	4	11907308,11911744,11912842,11913084,	11907812,11911876,11912980,11913170,	0	ENSDARG00000070448.8	cmpl	incmpl	0,0,0,1,
ENSDART00000170032.2	chr1	-	11940160	11973334	11973334	11973334	6	11940160,11946964,11947219,11947762,11955106,11973019,	11940791,11947065,11947297,11947875,11955202,11973334,	0	ENSDARG00000070448.8	none	none	-1,-1,-1,-1,-1,-1,
ENSDART00000103399.6	chr1	+	11977425	11994710	11977693	11993725	9	11977425,11980994,11981133,11986365,11988250,11988651,11990258,11991154,11993712,	11977774,11981045,11981280,11986536,11988376,11988699,11990375,11991216,11994710,	0	ENSDARG00000070449.6	cmpl	cmpl	0,0,0,0,0,0,0,0,2,
ENSDART00000080100.6	chr1	+	12009672	12044390	12014523	12040864	10	12009672,12014371,12030928,12031060,12031247,12032976,12033150,12035844,12037139,12040614,	12009762,12015435,12030964,12031169,12031322,12033053,12033294,12035934,12037306,12044390,	0	ENSDARG00000042988.8	cmpl	cmpl	-1,0,0,0,1,1,0,0,0,2,
ENSDART00000145929.3	chr1	+	12015115	12033278	12033278	12033278	7	12015115,12030928,12031060,12031247,12032813,12032976,12033150,	12015435,12030964,12031169,12031322,12032840,12033053,12033278,	0	ENSDARG00000042988.8	none	none	-1,-1,-1,-1,-1,-1,-1,
ENSDART00000132752.2	chr1	+	12015155	12031300	12031300	12031300	5	12015155,12019201,12030928,12031060,12031247,	12015435,12019258,12030964,12031169,12031300,	0	ENSDARG00000042988.8	none	none	-1,-1,-1,-1,-1,
ENSDART00000152479.2	chr1	+	12046543	12048509	12046598	12048409	3	12046543,12047727,12048402,	12046637,12047816,12048509,	0	ENSDARG00000096506.2	cmpl	cmpl	0,0,2,
ENSDART00000152634.2	chr1	+	12046590	12047368	12047368	12047368	2	12046590,12047264,	12046637,12047368,	0	ENSDARG00000096506.2	none	none	-1,-1,
ENSDART00000103403.5	chr1	+	12049228	12058439	12049416	12057916	6	12049228,12051612,12054572,12056110,12057643,12057890,	12049489,12051791,12055065,12056285,12057735,12058439,	0	ENSDARG00000070452.5	cmpl	cmpl	0,1,0,1,2,1,
ENSDART00000137697.2	chr1	+	12049230	12058134	12049416	12057916	6	12049230,12051612,12054572,12056107,12057643,12057890,	12049489,12051791,12055065,12056285,12057735,12058134,	0	ENSDARG00000070452.5	cmpl	cmpl	0,1,0,1,2,1,
ENSDART00000103406.5	chr1	-	12061283	12064799	12062053	12064567	4	12061283,12062753,12064168,12064332,	12062172,12062919,12064245,12064799,	0	ENSDARG00000070454.7	cmpl	cmpl	1,0,1,0,
ENSDART00000143628.2	chr1	-	12061922	12064715	12062053	12064715	4	12061922,12062753,12064168,12064347,	12062172,12062919,12064245,12064715,	0	ENSDARG00000070454.7	cmpl	incmpl	1,0,1,2,
ENSDART00000152392.3	chr1	-	12065155	12068520	12066473	12068503	2	12065155,12068380,	12067196,12068520,	0	ENSDARG00000096515.3	cmpl	cmpl	0,0,
ENSDART00000055566.6	chr1	+	12068799	12097818	12069411	12091334	9	12068799,12069404,12069672,12071585,12071920,12074388,12077013,12090455,12097766,	12068877,12069589,12069783,12071691,12072086,12074506,12077105,12091340,12097818,	0	ENSDARG00000038114.6	cmpl	cmpl	-1,0,1,1,2,0,1,0,-1,
ENSDART00000140116.2	chr1	+	12071920	12077478	12077478	12077478	3	12071920,12074388,12077013,	12072086,12074506,12077478,	0	ENSDARG00000038114.6	none	none	-1,-1,-1,
ENSDART00000079930.6	chr1	-	12105900	12109216	12107993	12109216	2	12105900,12109043,	12108141,12109216,	0	ENSDARG00000008637.10	cmpl	incmpl	2,0,
ENSDART00000164817.2	chr1	-	12107686	12126535	12107993	12114935	6	12107686,12109043,12112527,12114791,12124499,12126407,	12108141,12109214,12112652,12114947,12124589,12126535,	0	ENSDARG00000008637.10	cmpl	cmpl	2,2,0,0,-1,-1,
ENSDART00000015251.9	chr1	-	12107686	12126625	12107993	12126468	18	12107686,12109043,12112527,12114791,12115104,12117809,12118016,12118298,12120016,12120684,12121016,12121255,12121499,12122203,12122398,12122599,12124407,12126407,	12108141,12109214,12112652,12115019,12115226,12117907,12118228,12118511,12120124,12120853,12121174,12121406,12121639,12122320,12122506,12122743,12124589,12126625,	0	ENSDARG00000008637.10	cmpl	cmpl	2,2,0,0,1,2,0,0,0,2,0,2,0,0,0,0,1,0,
ENSDART00000126020.3	chr1	+	12135128	12138612	12135141	12138552	4	12135128,12135402,12138131,12138506,	12135190,12135425,12138244,12138612,	0	ENSDARG00000091609.3	cmpl	cmpl	0,1,0,2,
ENSDART00000162146.2	chr1	-	12141875	12160981	12141875	12160981	4	12141875,12143365,12155586,12160668,	12141962,12143374,12155822,12160981,	0	ENSDARG00000002634.13	cmpl	cmpl	0,0,1,0,
ENSDART00000166429.2	chr1	-	12145642	12161148	12145642	12160981	4	12145642,12151440,12155586,12160668,	12145765,12151628,12155822,12161148,	0	ENSDARG00000002634.13	incmpl	cmpl	2,0,1,0,
ENSDART00000132560.2	chr1	+	12172321	12181039	12181039	12181039	5	12172321,12173564,12178489,12180769,12181033,	12172419,12173625,12178808,12180890,12181039,	0	ENSDARG00000062467.7	none	none	-1,-1,-1,-1,-1,
ENSDART00000146842.3	chr1	+	12177194	12182259	12178498	12182259	9	12177194,12178489,12178677,12180769,12181033,12181326,12181908,12182061,12182255,	12177429,12178590,12178808,12180890,12181079,12181455,12181976,12182173,12182259,	0	ENSDARG00000062467.7	cmpl	incmpl	-1,0,2,1,2,0,0,2,0,
ENSDART00000142081.3	chr1	+	12177265	12190943	12178498	12190527	17	12177265,12178489,12178677,12180769,12181033,12181326,12181908,12182061,12182255,12183990,12184151,12184339,12184580,12186212,12186752,12187611,12190309,	12177433,12178590,12178808,12180890,12181079,12181455,12181976,12182173,12182412,12184066,12184233,12184388,12184698,12186332,12186916,12187758,12190943,	0	ENSDARG00000062467.7	cmpl	cmpl	-1,0,2,1,2,0,0,2,0,1,2,0,1,2,2,1,1,
ENSDART00000090380.5	chr1	+	12178214	12193239	12178498	12190527	16	12178214,12178677,12180769,12181033,12181326,12181908,12182061,12182255,12183990,12184151,12184339,12184580,12186212,12186752,12187611,12190309,	12178590,12178808,12180890,12181079,12181455,12181976,12182173,12182412,12184066,12184233,12184388,12184698,12186332,12186916,12187758,12193239,	0	ENSDARG00000062467.7	cmpl	cmpl	0,2,1,2,0,0,2,0,1,2,0,1,2,2,1,1,
ENSDART00000136188.3	chr1	+	12184496	12187694	12187694	12187694	4	12184496,12186212,12186752,12187611,	12184698,12186332,12186916,12187694,	0	ENSDARG00000062467.7	none	none	-1,-1,-1,-1,
ENSDART00000141894.2	chr1	+	12186149	12187708	12187708	12187708	3	12186149,12186752,12187611,	12186332,12186916,12187708,	0	ENSDARG00000062467.7	none	none	-1,-1,-1,
ENSDART00000040307.9	chr1	+	12195699	12228116	12196945	12227694	18	12195699,12196944,12198100,12199535,12199764,12201014,12203572,12205935,12206287,12208766,12211354,12211639,12211862,12213133,12213816,12214789,12215315,12227473,	12195772,12197152,12198245,12199689,12199844,12201193,12204003,12206199,12206474,12208878,12211557,12211774,12211946,12213268,12213927,12215220,12215476,12228116,	0	ENSDARG00000032808.9	cmpl	cmpl	-1,0,0,1,2,1,0,2,2,0,1,0,0,0,0,0,2,1,
ENSDART00000143839.2	chr1	+	12196687	12199650	12196774	12199650	4	12196687,12196944,12198100,12199535,	12196863,12197152,12198245,12199650,	0	ENSDARG00000032808.9	cmpl	incmpl	0,2,0,1,
ENSDART00000111485.4	chr1	+	12231477	12257979	12231477	12257784	9	12231477,12237628,12238767,12245582,12247262,12247511,12251272,12251606,12257725,	12231594,12237785,12238887,12245672,12247393,12247619,12251416,12251751,12257979,	0	ENSDARG00000078318.5	cmpl	cmpl	0,0,1,1,1,0,0,0,1,
ENSDART00000137463.3	chr1	-	12262979	12278079	12263928	12277526	4	12262979,12265722,12277495,12277897,	12264120,12265901,12277603,12278079,	0	ENSDARG00000018997.11	cmpl	cmpl	0,1,0,-1,
ENSDART00000139336.3	chr1	-	12262979	12278056	12263928	12277526	4	12262979,12265722,12277495,12277852,	12264120,12265901,12277603,12278056,	0	ENSDARG00000018997.11	cmpl	cmpl	0,1,0,-1,
ENSDART00000142122.3	chr1	-	12262979	12278522	12263928	12277526	4	12262979,12265722,12277495,12278104,	12264120,12265901,12277603,12278522,	0	ENSDARG00000018997.11	cmpl	cmpl	0,1,0,-1,
ENSDART00000003825.7	chr1	-	12263079	12278581	12263928	12277526	4	12263079,12265722,12277495,12278385,	12264120,12265901,12277603,12278581,	0	ENSDARG00000018997.11	cmpl	cmpl	0,1,0,-1,
ENSDART00000158595.2	chr1	+	12295141	12334540	12308496	12333254	12	12295141,12308478,12314761,12318187,12322693,12323062,12325101,12325832,12327421,12329482,12329928,12333018,	12295307,12308687,12315216,12318340,12322906,12323150,12325312,12325962,12327643,12329665,12330045,12334540,	0	ENSDARG00000099771.2	cmpl	cmpl	-1,0,2,1,1,1,2,0,1,1,1,1,
ENSDART00000165733.2	chr1	+	12301912	12315139	12302072	12315139	4	12301912,12306735,12308478,12314761,	12302102,12306759,12308687,12315139,	0	ENSDARG00000099771.2	cmpl	incmpl	0,0,0,2,
ENSDART00000164045.2	chr1	+	12302072	12333254	12302072	12333254	12	12302072,12308478,12314761,12318187,12322693,12323062,12325101,12325832,12327421,12329482,12329928,12333018,	12302102,12308687,12315216,12318340,12322906,12323150,12325312,12325962,12327643,12329665,12330045,12333254,	0	ENSDARG00000099771.2	cmpl	cmpl	0,0,2,1,1,1,2,0,1,1,1,1,
ENSDART00000168776.2	chr1	+	12329542	12333372	12333372	12333372	2	12329542,12333018,	12330045,12333372,	0	ENSDARG00000099771.2	none	none	-1,-1,
ENSDART00000067086.6	chr1	+	12335815	12344792	12335921	12344595	6	12335815,12338591,12340982,12341632,12342444,12344385,	12336053,12338807,12341082,12341787,12342711,12344792,	0	ENSDARG00000045620.6	cmpl	cmpl	0,0,0,1,0,0,
ENSDART00000144920.3	chr1	+	12348212	12361417	12348319	12361388	5	12348212,12352640,12354936,12355142,12361216,	12348506,12352669,12355054,12355254,12361417,	0	ENSDARG00000045618.6	cmpl	cmpl	0,1,0,1,2,
ENSDART00000138759.3	chr1	+	12348231	12361620	12348319	12361388	6	12348231,12352640,12354936,12355142,12357282,12361216,	12348506,12352669,12355054,12355254,12357336,12361620,	0	ENSDARG00000045618.6	cmpl	cmpl	0,1,0,1,2,2,
ENSDART00000067082.5	chr1	+	12348231	12361930	12348319	12361388	7	12348231,12352640,12354936,12355142,12357282,12360153,12361216,	12348506,12352669,12355054,12355254,12357336,12360189,12361930,	0	ENSDARG00000045618.6	cmpl	cmpl	0,1,0,1,2,2,2,
ENSDART00000142900.3	chr1	+	12348236	12355565	12355565	12355565	4	12348236,12352640,12354936,12355142,	12348506,12352669,12355054,12355565,	0	ENSDARG00000045618.6	none	none	-1,-1,-1,-1,
ENSDART00000136658.3	chr1	+	12348266	12357666	12357666	12357666	5	12348266,12352640,12354936,12355142,12357282,	12348506,12352669,12355054,12355254,12357666,	0	ENSDARG00000045618.6	none	none	-1,-1,-1,-1,-1,
ENSDART00000144475.2	chr1	+	12348357	12357076	12357076	12357076	5	12348357,12352640,12354936,12355142,12356678,	12348506,12352669,12355054,12355254,12357076,	0	ENSDARG00000045618.6	none	none	-1,-1,-1,-1,-1,
ENSDART00000146067.3	chr1	-	12364455	12394048	12364788	12393052	22	12364455,12365397,12365829,12367505,12369528,12369907,12370502,12370667,12373691,12373880,12376339,12376597,12379113,12381375,12384275,12388132,12390454,12390748,12392281,12392858,12393018,12393806,	12364851,12365493,12365908,12367702,12369721,12370053,12370577,12370739,12373790,12374058,12376431,12376688,12379184,12381441,12384398,12388262,12390510,12390821,12392331,12392926,12393060,12394048,	0	ENSDARG00000057248.8	cmpl	cmpl	0,0,2,0,2,0,0,0,0,2,0,2,0,0,0,2,0,2,0,1,0,-1,
ENSDART00000079782.7	chr1	-	12364788	12393060	12364788	12393052	21	12364788,12365397,12365829,12367505,12369528,12369907,12370502,12370667,12373691,12373880,12376339,12376597,12379113,12381375,12384275,12388132,12390454,12390748,12392281,12392858,12393018,	12364851,12365493,12365908,12367702,12369721,12370053,12370577,12370739,12373790,12374058,12376431,12376688,12379184,12381441,12384398,12388262,12390510,12390821,12392331,12392926,12393060,	0	ENSDARG00000057248.8	cmpl	cmpl	0,0,2,0,2,0,0,0,0,2,0,2,0,0,0,2,0,2,0,1,0,
ENSDART00000134708.3	chr1	-	12384275	12394101	12384275	12393052	8	12384275,12388132,12390454,12390748,12392281,12392858,12393018,12394063,	12384398,12388262,12390510,12390821,12392331,12392926,12393060,12394101,	0	ENSDARG00000057248.8	incmpl	cmpl	0,2,0,2,0,1,0,-1,
ENSDART00000144596.2	chr1	-	12388202	12397258	12388202	12393052	8	12388202,12390454,12390748,12392281,12392858,12393018,12394684,12397126,	12388262,12390510,12390821,12392331,12392926,12393060,12394843,12397258,	0	ENSDARG00000057248.8	incmpl	cmpl	2,0,2,0,1,0,-1,-1,
ENSDART00000138622.3	chr1	+	12394204	12397780	12394647	12397537	6	12394204,12394616,12395197,12395345,12397152,12397437,	12394304,12394828,12395258,12395397,12397352,12397780,	0	ENSDARG00000017985.7	cmpl	cmpl	-1,0,1,2,0,2,
ENSDART00000134575.2	chr1	+	12394208	12395287	12395287	12395287	3	12394208,12394616,12395197,	12394304,12394828,12395287,	0	ENSDARG00000017985.7	none	none	-1,-1,-1,
ENSDART00000136421.3	chr1	+	12394263	12397300	12394647	12397300	6	12394263,12394393,12394616,12395197,12395345,12397152,	12394304,12394439,12394828,12395258,12395397,12397300,	0	ENSDARG00000017985.7	cmpl	incmpl	-1,-1,0,1,2,0,
ENSDART00000139440.3	chr1	+	12394294	12397352	12394647	12397352	5	12394294,12394616,12395197,12395345,12397152,	12394439,12394828,12395258,12395397,12397352,	0	ENSDARG00000017985.7	cmpl	incmpl	-1,0,1,2,0,
ENSDART00000184296.1	chr1	+	12394393	12400783	12394647	12397537	6	12394393,12394616,12395197,12395345,12397152,12397437,	12394439,12394828,12395258,12395397,12397352,12400783,	0	ENSDARG00000017985.7	cmpl	cmpl	-1,0,1,2,0,2,
ENSDART00000008127.6	chr1	+	12394478	12397886	12394647	12397537	5	12394478,12395197,12395345,12397152,12397437,	12394828,12395258,12395397,12397352,12397886,	0	ENSDARG00000017985.7	cmpl	cmpl	0,1,2,0,2,
ENSDART00000192154.1	chr1	+	12431327	12431442	12431442	12431442	1	12431327,	12431442,	0	ENSDARG00000113585.1	none	none	-1,
ENSDART00000179648.2	chr1	+	12543358	12543475	12543475	12543475	1	12543358,	12543475,	0	ENSDARG00000106508.2	none	none	-1,
ENSDART00000194595.1	chr1	-	12552299	12564530	12564530	12564530	2	12552299,12564230,	12554407,12564530,	0	ENSDARG00000117227.1	none	none	-1,-1,
ENSDART00000194054.1	chr1	-	12564190	12679517	12679517	12679517	2	12564190,12679357,	12564339,12679517,	0	ENSDARG00000117227.1	none	none	-1,-1,
ENSDART00000165050.2	chr1	+	12672978	12676287	12676287	12676287	3	12672978,12675557,12675743,	12673219,12675631,12676287,	0	ENSDARG00000104707.2	none	none	-1,-1,-1,
ENSDART00000157930.2	chr1	-	12675626	12677908	12677908	12677908	3	12675626,12676991,12677658,	12676111,12677032,12677908,	0	ENSDARG00000102049.2	none	none	-1,-1,-1,
ENSDART00000170656.2	chr1	-	12675739	12677821	12677821	12677821	2	12675739,12677658,	12676111,12677821,	0	ENSDARG00000102049.2	none	none	-1,-1,
ENSDART00000169150.2	chr1	-	12675986	12677715	12677715	12677715	3	12675986,12676991,12677658,	12676145,12677032,12677715,	0	ENSDARG00000102049.2	none	none	-1,-1,-1,
ENSDART00000185452.1	chr1	+	12735919	12736034	12736034	12736034	1	12735919,	12736034,	0	ENSDARG00000116228.1	none	none	-1,
ENSDART00000180121.1	chr1	+	12763460	12793458	12763919	12793357	4	12763460,12767317,12770219,12793007,	12766409,12767376,12770326,12793458,	0	ENSDARG00000099729.2	cmpl	cmpl	0,0,2,1,
ENSDART00000159226.2	chr1	+	12763460	12763970	12763919	12763970	1	12763460,	12763970,	0	ENSDARG00000099729.2	cmpl	incmpl	0,
ENSDART00000189465.1	chr1	+	12763919	12796578	12763919	12796578	5	12763919,12767317,12770219,12793007,12796558,	12766409,12767376,12770326,12793325,12796578,	0	ENSDARG00000099729.2	cmpl	cmpl	0,0,2,1,1,
ENSDART00000165785.2	chr1	+	12766350	12797410	12766350	12796612	5	12766350,12767317,12770219,12793007,12796558,	12766409,12767376,12770326,12793165,12797410,	0	ENSDARG00000099729.2	incmpl	cmpl	1,0,2,1,0,
ENSDART00000162652.2	chr1	+	12767317	12793593	12767317	12793357	3	12767317,12770219,12793007,	12767376,12770326,12793593,	0	ENSDARG00000099729.2	incmpl	cmpl	0,2,1,
ENSDART00000172433.2	chr1	+	12848060	12853263	12853263	12853263	6	12848060,12849387,12850784,12850931,12851191,12852590,	12848109,12849421,12850840,12851080,12851268,12853263,	0	ENSDARG00000105122.2	none	none	-1,-1,-1,-1,-1,-1,
ENSDART00000167315.2	chr1	+	12848071	12853013	12853013	12853013	6	12848071,12849387,12850784,12850931,12851191,12852590,	12848109,12849421,12850840,12850957,12851268,12853013,	0	ENSDARG00000105122.2	none	none	-1,-1,-1,-1,-1,-1,
ENSDART00000162959.2	chr1	+	12931445	12937089	12937089	12937089	2	12931445,12935964,	12931676,12937089,	0	ENSDARG00000098668.2	none	none	-1,-1,
ENSDART00000159014.2	chr1	+	13002977	13003067	13003067	13003067	1	13002977,	13003067,	0	ENSDARG00000098053.2	none	none	-1,
ENSDART00000166364.2	chr1	-	13077466	13203911	13203911	13203911	2	13077466,13203508,	13077629,13203911,	0	ENSDARG00000102604.2	none	none	-1,-1,
ENSDART00000170314.2	chr1	+	13087796	13089102	13087963	13088750	2	13087796,13088441,	13088155,13089102,	0	ENSDARG00000102339.2	cmpl	cmpl	0,0,
ENSDART00000167925.2	chr1	-	13180603	13203719	13203719	13203719	3	13180603,13184272,13203508,	13180896,13184305,13203719,	0	ENSDARG00000102604.2	none	none	-1,-1,-1,
ENSDART00000127838.4	chr1	-	13260808	13271569	13261735	13270650	4	13260808,13265284,13267815,13268160,	13262394,13265454,13267904,13271569,	0	ENSDARG00000089805.4	cmpl	cmpl	1,2,0,0,
ENSDART00000193663.1	chr1	-	13261122	13271085	13261735	13270650	4	13261122,13265284,13267815,13268160,	13262391,13265454,13267871,13271085,	0	ENSDARG00000089805.4	cmpl	cmpl	1,2,0,0,
ENSDART00000194606.1	chr1	-	13373949	13493950	13493950	13493950	3	13373949,13467903,13493799,	13374638,13468029,13493950,	0	ENSDARG00000117726.1	none	none	-1,-1,-1,
ENSDART00000194077.1	chr1	-	13460592	13493950	13493950	13493950	3	13460592,13467903,13493799,	13460735,13468029,13493950,	0	ENSDARG00000117726.1	none	none	-1,-1,-1,
ENSDART00000194013.1	chr1	-	13493725	13678213	13678213	13678213	2	13493725,13678106,	13493948,13678213,	0	ENSDARG00000117726.1	none	none	-1,-1,
ENSDART00000194796.1	chr1	-	13596297	13602838	13602838	13602838	5	13596297,13599487,13601329,13601658,13602765,	13599244,13599656,13601533,13601869,13602838,	0	ENSDARG00000117541.1	none	none	-1,-1,-1,-1,-1,
ENSDART00000194501.1	chr1	-	13596297	13604379	13604379	13604379	5	13596297,13599487,13601329,13602765,13603604,	13599244,13599656,13601533,13602838,13604379,	0	ENSDARG00000117541.1	none	none	-1,-1,-1,-1,-1,
ENSDART00000188563.1	chr1	-	13782929	13783046	13783046	13783046	1	13782929,	13783046,	0	ENSDARG00000112668.1	none	none	-1,
ENSDART00000177504.2	chr1	-	13875804	13875921	13875921	13875921	1	13875804,	13875921,	0	ENSDARG00000110084.1	none	none	-1,
ENSDART00000111026.4	chr1	+	13930624	13952084	13947932	13952084	3	13930624,13947924,13951233,	13930853,13948197,13952084,	0	ENSDARG00000078525.4	cmpl	cmpl	-1,0,1,
ENSDART00000011414.10	chr1	-	13957234	13964284	13958281	13963990	6	13957234,13960784,13961241,13963477,13963663,13963950,	13958918,13961132,13961431,13963558,13963840,13964284,	0	ENSDARG00000079626.5	cmpl	cmpl	2,2,1,1,1,0,
ENSDART00000103383.5	chr1	-	13957234	13968153	13958281	13968072	7	13957234,13960784,13961241,13963477,13963663,13963950,13968014,	13958918,13961132,13961431,13963558,13963840,13964058,13968153,	0	ENSDARG00000079626.5	cmpl	cmpl	2,2,1,1,1,1,0,
ENSDART00000191046.1	chr1	-	13958281	13989643	13958281	13976093	9	13958281,13960784,13961241,13963477,13963663,13963950,13972646,13976018,13989149,	13958918,13961132,13961431,13963558,13963840,13964058,13972854,13976139,13989643,	0	ENSDARG00000079626.5	cmpl	cmpl	2,2,1,1,1,1,0,0,-1,
ENSDART00000079716.4	chr1	+	14020444	14026780	14020483	14026025	8	14020444,14021136,14022157,14022459,14022678,14023249,14023466,14025890,	14020525,14021311,14022341,14022558,14022829,14023337,14023639,14026780,	0	ENSDARG00000057114.4	cmpl	cmpl	0,0,1,2,2,0,1,0,
ENSDART00000021693.9	chr1	+	14073890	14158563	14073890	14158563	52	14073890,14077839,14084156,14086546,14086818,14089384,14091128,14094032,14096687,14097060,14099899,14100176,14102580,14104731,14104920,14108135,14108578,14108898,14110186,14110406,14111349,14111529,14111725,14111880,14114936,14115313,14118749,14119157,14120221,14124851,14125357,14127471,14129109,14129405,14131701,14132985,14133224,14135446,14135577,14137140,14143648,14143809,14144043,14144289,141…	14073998,14077941,14084255,14086645,14086917,14089570,14091152,14094131,14096786,14097159,14100097,14100275,14102679,14104830,14105118,14108234,14108677,14109096,14110285,14110505,14111448,14111628,14111798,14111934,14115060,14115398,14118850,14119193,14120446,14124950,14125512,14127683,14129302,14129502,14131930,14133111,14133347,14135479,14135599,14142906,14143726,14143941,14144184,14144491,141…	0	ENSDARG00000009026.10	cmpl	cmpl	0,0,0,0,0,0,0,0,0,0,0,0,0,0,0,0,0,0,0,0,0,0,0,1,1,2,0,2,2,2,2,1,0,1,2,0,0,0,0,1,1,1,1,1,2,0,0,0,0,0,0,2,
ENSDART00000120800.2	chr1	-	14074306	14074375	14074375	14074375	1	14074306,	14074375,	0	ENSDARG00000085400.2	none	none	-1,
ENSDART00000040049.7	chr1	-	14163505	14234076	14163978	14233815	19	14163505,14166612,14169241,14169650,14176539,14178549,14188005,14190348,14191102,14191307,14191640,14193506,14195721,14196252,14196810,14201758,14201897,14230159,14233753,	14163982,14166841,14169336,14169726,14176588,14178594,14188046,14190391,14191186,14191430,14191735,14193590,14195824,14196325,14196876,14201813,14201957,14230254,14234076,	0	ENSDARG00000014273.11	cmpl	cmpl	2,1,2,1,0,0,1,0,0,0,1,1,0,2,2,1,1,2,0,
ENSDART00000044896.9	chr1	-	14166608	14233815	14166608	14233815	21	14166608,14169241,14169650,14172091,14176123,14176539,14178549,14183902,14188005,14190348,14191102,14191307,14191640,14193506,14195721,14196252,14196810,14201758,14201897,14230159,14233753,	14166841,14169336,14169726,14172112,14176225,14176588,14178594,14183962,14188046,14190391,14191186,14191430,14191735,14193590,14195824,14196325,14196876,14201813,14201957,14230254,14233815,	0	ENSDARG00000014273.11	cmpl	cmpl	1,2,1,1,1,0,0,0,1,0,0,0,1,1,0,2,2,1,1,2,0,
ENSDART00000161996.2	chr1	+	14253117	14254166	14253270	14253900	4	14253117,14253446,14253691,14253887,	14253334,14253579,14253778,14254166,	0	ENSDARG00000104795.2	cmpl	cmpl	0,1,2,2,
ENSDART00000079359.6	chr1	-	14257157	14258409	14257157	14258409	6	14257157,14257432,14257622,14257829,14258137,14258305,	14257280,14257516,14257697,14257893,14258215,14258409,	0	ENSDARG00000056806.6	cmpl	incmpl	0,0,0,2,2,0,
ENSDART00000017679.10	chr1	+	14283691	14306838	14284344	14306159	11	14283691,14284073,14284220,14288447,14289922,14292924,14297018,14300774,14302738,14305570,14305855,	14283885,14284145,14284408,14288545,14290097,14293037,14297196,14300939,14302908,14305662,14306838,	0	ENSDARG00000056797.7	cmpl	cmpl	-1,-1,0,1,0,1,0,1,1,0,2,
ENSDART00000090025.5	chr1	-	14313849	14332283	14313849	14327088	7	14313849,14322092,14322903,14324081,14325574,14326883,14332142,	14315029,14322781,14323041,14324236,14325652,14327335,14332283,	0	ENSDARG00000062341.5	cmpl	cmpl	2,0,0,1,1,0,-1,
ENSDART00000177692.2	chr1	+	14337210	14337313	14337313	14337313	1	14337210,	14337313,	0	ENSDARG00000107022.2	none	none	-1,
ENSDART00000064468.7	chr1	+	14348398	14364710	14348464	14364278	14	14348398,14349364,14351596,14353771,14354225,14354397,14355703,14355873,14358046,14360701,14360921,14363072,14363857,14364186,	14348512,14349453,14351781,14353936,14354287,14354478,14355772,14355994,14358203,14360843,14361092,14363252,14364023,14364710,	0	ENSDARG00000056742.6	cmpl	cmpl	0,0,2,1,1,0,0,0,1,2,0,0,0,1,
ENSDART00000046874.6	chr1	+	14372679	14373891	14372679	14373891	1	14372679,	14373891,	0	ENSDARG00000037576.5	incmpl	cmpl	0,
ENSDART00000103346.5	chr1	+	14382583	14404555	14383021	14403514	17	14382583,14385657,14387378,14387597,14389975,14390156,14390346,14391877,14392150,14395428,14397743,14398034,14399230,14400203,14400418,14402947,14403372,	14383100,14385715,14387493,14387704,14390040,14390264,14390477,14391993,14392204,14395528,14397897,14398061,14399285,14400262,14400599,14403109,14404555,	0	ENSDARG00000070431.5	cmpl	cmpl	0,1,2,0,2,1,1,0,2,2,0,1,1,2,1,2,2,
ENSDART00000030083.6	chr1	+	14406097	14416435	14406245	14415184	6	14406097,14407453,14408323,14411309,14411442,14415133,	14406376,14407508,14408479,14411366,14411502,14416435,	0	ENSDARG00000022690.6	cmpl	cmpl	0,2,0,0,0,0,
ENSDART00000184641.1	chr1	-	14417784	14426804	14418512	14426727	8	14417784,14420952,14422480,14423710,14423929,14425940,14426172,14426673,	14418550,14421111,14422632,14423840,14423977,14425994,14426257,14426804,	0	ENSDARG00000056677.7	cmpl	cmpl	1,1,2,1,1,1,0,0,
ENSDART00000123895.3	chr1	-	14420803	14426804	14420929	14426727	7	14420803,14422480,14423710,14423929,14425940,14426172,14426673,	14421111,14422632,14423840,14423977,14425994,14426257,14426804,	0	ENSDARG00000056677.7	cmpl	cmpl	1,2,1,1,1,0,0,
ENSDART00000024328.9	chr1	+	14432433	14442902	14434382	14442435	13	14432433,14434379,14434670,14435369,14435756,14436239,14438185,14438598,14438780,14438984,14439446,14441662,14441883,	14432682,14434443,14434781,14435498,14435900,14436351,14438381,14438694,14438865,14439152,14439563,14441787,14442902,	0	ENSDARG00000012903.10	cmpl	cmpl	-1,0,1,1,1,1,2,0,0,1,1,1,0,
ENSDART00000005067.10	chr1	+	14454662	14464020	14454689	14460399	11	14454662,14455501,14455638,14456452,14456713,14456977,14457782,14458082,14458375,14458655,14460056,	14454709,14455540,14455734,14456618,14456888,14457115,14457895,14458223,14458531,14458759,14464020,	0	ENSDARG00000003398.11	cmpl	cmpl	0,2,2,2,0,1,1,0,0,0,2,
ENSDART00000114097.4	chr1	+	14466859	14488074	14466859	14483215	12	14466859,14468362,14472937,14473145,14474730,14475100,14476217,14476473,14477553,14478225,14479896,14481873,	14466980,14468493,14473052,14473257,14474846,14475278,14476395,14476635,14477654,14478464,14480080,14488074,	0	ENSDARG00000074867.4	cmpl	cmpl	0,1,0,1,2,1,2,0,0,2,1,2,
ENSDART00000190599.1	chr1	-	14497457	14503182	14500870	14503182	3	14497457,14502303,14503170,	14502104,14502659,14503182,	0	ENSDARG00000109597.1	cmpl	cmpl	2,0,0,
ENSDART00000057044.8	chr1	-	14499780	14506759	14500466	14506759	5	14499780,14500874,14502303,14503170,14506687,	14500734,14502104,14502659,14503245,14506759,	0	ENSDARG00000109597.1	cmpl	incmpl	2,2,0,0,0,
ENSDART00000184399.1	chr1	-	14515444	14515539	14515539	14515539	1	14515444,	14515539,	0	ENSDARG00000111274.1	none	none	-1,
ENSDART00000180678.1	chr1	-	14522912	14533611	14527903	14533611	3	14522912,14529370,14533335,	14529137,14529579,14533611,	0	ENSDARG00000110922.1	cmpl	cmpl	2,0,0,
ENSDART00000184256.1	chr1	-	14553220	14553315	14553315	14553315	1	14553220,	14553315,	0	ENSDARG00000116310.1	none	none	-1,
ENSDART00000193804.1	chr1	-	14560390	14560485	14560485	14560485	1	14560390,	14560485,	0	ENSDARG00000109592.1	none	none	-1,
ENSDART00000194034.1	chr1	-	14565964	14655613	14655613	14655613	2	14565964,14655372,	14566761,14655613,	0	ENSDARG00000117482.1	none	none	-1,-1,
ENSDART00000167563.2	chr1	-	14593704	14593798	14593798	14593798	1	14593704,	14593798,	0	ENSDARG00000103921.2	none	none	-1,
ENSDART00000194461.1	chr1	-	14600982	14631055	14631055	14631055	3	14600982,14630279,14630835,	14601337,14630323,14631055,	0	ENSDARG00000117482.1	none	none	-1,-1,-1,
ENSDART00000194957.1	chr1	-	14600982	14655613	14655613	14655613	3	14600982,14630279,14655372,	14601337,14630323,14655613,	0	ENSDARG00000117482.1	none	none	-1,-1,-1,
ENSDART00000188627.1	chr1	-	14639581	14639676	14639676	14639676	1	14639581,	14639676,	0	ENSDARG00000114198.1	none	none	-1,
ENSDART00000177054.2	chr1	-	14648998	14649069	14649069	14649069	1	14648998,	14649069,	0	ENSDARG00000106947.2	none	none	-1,
ENSDART00000192194.1	chr1	+	14658800	14660280	14658800	14660280	2	14658800,14659046,	14658835,14660280,	0	ENSDARG00000039063.8	cmpl	cmpl	0,2,
ENSDART00000193331.1	chr1	-	14672439	14694809	14673220	14694809	2	14672439,14694472,	14673564,14694809,	0	ENSDARG00000113383.1	cmpl	cmpl	1,0,
ENSDART00000179745.1	chr1	+	14673776	14673871	14673871	14673871	1	14673776,	14673871,	0	ENSDARG00000109748.1	none	none	-1,
ENSDART00000187273.1	chr1	+	14694560	14694655	14694655	14694655	1	14694560,	14694655,	0	ENSDARG00000116279.1	none	none	-1,
ENSDART00000192733.1	chr1	+	14701735	14701830	14701830	14701830	1	14701735,	14701830,	0	ENSDARG00000109910.1	none	none	-1,
ENSDART00000188325.1	chr1	+	14708875	14708970	14708970	14708970	1	14708875,	14708970,	0	ENSDARG00000116174.1	none	none	-1,
ENSDART00000184805.1	chr1	+	14716015	14716110	14716110	14716110	1	14716015,	14716110,	0	ENSDARG00000116266.1	none	none	-1,
ENSDART00000193514.1	chr1	+	14723155	14723250	14723250	14723250	1	14723155,	14723250,	0	ENSDARG00000111171.1	none	none	-1,
ENSDART00000175698.2	chr1	+	14730295	14730390	14730390	14730390	1	14730295,	14730390,	0	ENSDARG00000111710.1	none	none	-1,
ENSDART00000192228.1	chr1	+	14737469	14737564	14737564	14737564	1	14737469,	14737564,	0	ENSDARG00000111723.1	none	none	-1,
ENSDART00000193139.1	chr1	+	14744644	14744739	14744739	14744739	1	14744644,	14744739,	0	ENSDARG00000115042.1	none	none	-1,
ENSDART00000187557.1	chr1	+	14767575	14767670	14767670	14767670	1	14767575,	14767670,	0	ENSDARG00000114262.1	none	none	-1,
ENSDART00000111475.3	chr1	+	15137900	15203357	15138841	15200766	4	15137900,15141980,15197594,15200263,	15141412,15142697,15197793,15203357,	0	ENSDARG00000078898.3	cmpl	cmpl	0,0,0,1,
ENSDART00000188410.1	chr1	+	15204632	15224338	15217003	15223298	8	15204632,15216989,15217312,15219089,15219420,15219979,15222266,15223157,	15204803,15217067,15217396,15219337,15219579,15220097,15222370,15224338,	0	ENSDARG00000007534.10	cmpl	cmpl	-1,0,1,1,0,0,1,0,
ENSDART00000121868.4	chr1	+	15216658	15223551	15217006	15223298	8	15216658,15216989,15217294,15219089,15219420,15219979,15222266,15223157,	15216686,15217067,15217396,15219337,15219579,15220097,15222370,15223551,	0	ENSDARG00000007534.10	cmpl	cmpl	-1,0,1,1,0,0,1,0,
ENSDART00000189206.1	chr1	+	15216987	15223551	15217003	15223298	7	15216987,15217294,15219089,15219420,15219979,15222266,15223157,	15217067,15217396,15219337,15219579,15220097,15222370,15223551,	0	ENSDARG00000007534.10	cmpl	cmpl	0,1,1,0,0,1,0,
ENSDART00000181639.1	chr1	+	15217002	15223298	15217006	15223298	7	15217002,15217294,15219089,15219420,15219979,15222266,15223157,	15217067,15217396,15219337,15219579,15220097,15222370,15223298,	0	ENSDARG00000007534.10	cmpl	cmpl	0,1,1,0,0,1,0,
ENSDART00000109911.5	chr1	+	15226267	15257315	15226360	15253281	18	15226267,15227403,15230378,15230655,15232607,15232802,15233109,15233571,15235802,15239256,15240084,15242334,15242908,15246093,15246433,15249314,15249558,15253099,	15226520,15227519,15230512,15230774,15232677,15232872,15233207,15233648,15235833,15239417,15240200,15242456,15243035,15246180,15246511,15249385,15249671,15257315,	0	ENSDARG00000077804.5	cmpl	cmpl	0,1,0,2,1,2,0,2,1,2,1,0,2,0,0,0,2,1,
ENSDART00000033018.11	chr1	+	15258640	15285455	15258890	15284564	10	15258640,15268663,15269363,15271760,15277350,15277894,15279419,15282024,15282584,15284390,	15259224,15268815,15269564,15271892,15277504,15277959,15279519,15282158,15282644,15285455,	0	ENSDARG00000013881.12	cmpl	cmpl	0,1,0,0,0,1,0,1,0,0,
ENSDART00000109970.4	chr1	-	15293530	15329277	15293530	15328962	14	15293530,15294675,15294939,15297368,15302305,15303214,15306141,15309417,15311045,15311766,15314876,15316668,15319003,15328949,	15293627,15294849,15295157,15297581,15302420,15303428,15306349,15309577,15311225,15313343,15314940,15316750,15319075,15329277,	0	ENSDARG00000079317.4	cmpl	cmpl	2,2,0,0,2,1,0,2,2,0,2,1,1,0,
ENSDART00000194301.1	chr1	-	15355856	15469666	15469666	15469666	5	15355856,15432640,15458758,15459562,15469354,	15357668,15432674,15458899,15459712,15469666,	0	ENSDARG00000117428.1	none	none	-1,-1,-1,-1,-1,
ENSDART00000194490.1	chr1	-	15355856	15492728	15492728	15492728	5	15355856,15432640,15458758,15459562,15491417,	15357668,15432674,15458899,15459712,15492728,	0	ENSDARG00000117428.1	none	none	-1,-1,-1,-1,-1,
ENSDART00000194150.1	chr1	-	15457384	15498152	15498152	15498152	4	15457384,15459562,15491417,15497648,	15458899,15459712,15492805,15498152,	0	ENSDARG00000117428.1	none	none	-1,-1,-1,-1,
ENSDART00000177122.2	chr1	-	15623960	15797663	15623960	15797193	7	15623960,15650622,15682077,15685753,15712297,15764365,15796998,	15624158,15650746,15682150,15685876,15712385,15764467,15797663,	0	ENSDARG00000106258.2	cmpl	cmpl	0,2,1,1,0,0,0,
ENSDART00000160270.2	chr1	+	16073886	16220234	16127824	16220126	10	16073886,16127821,16135485,16144614,16152804,16153559,16190462,16192162,16216327,16220110,	16074007,16127991,16135603,16144755,16152945,16153649,16190526,16192237,16216418,16220234,	0	ENSDARG00000078854.4	cmpl	cmpl	-1,0,2,0,0,0,0,1,1,2,
ENSDART00000122503.3	chr1	+	16127824	16220126	16127824	16220126	10	16127824,16128700,16135486,16144614,16152804,16153559,16190462,16192162,16216327,16220110,	16127991,16128701,16135603,16144755,16152945,16153649,16190526,16192237,16216418,16220126,	0	ENSDARG00000078854.4	cmpl	cmpl	0,2,0,0,0,0,0,1,1,2,
ENSDART00000054707.7	chr1	+	16144614	16220235	16144614	16220126	7	16144614,16152804,16153559,16190462,16192162,16216327,16220110,	16144755,16152945,16153649,16190526,16192237,16216418,16220235,	0	ENSDARG00000078854.4	incmpl	cmpl	0,0,0,0,1,1,2,
ENSDART00000177686.2	chr1	+	16162103	16162220	16162220	16162220	1	16162103,	16162220,	0	ENSDARG00000108223.2	none	none	-1,
ENSDART00000013024.8	chr1	-	16393076	16394814	16393122	16394380	3	16393076,16393576,16394103,	16393368,16393680,16394814,	0	ENSDARG00000007356.8	cmpl	cmpl	0,1,0,
ENSDART00000113266.4	chr1	+	16396869	16458257	16396928	16455921	15	16396869,16398767,16405944,16406127,16420420,16422604,16422777,16427926,16432029,16440840,16443214,16452796,16453376,16454839,16455914,	16397333,16398915,16405976,16406206,16420468,16422687,16422849,16427968,16432125,16440935,16443386,16452905,16453534,16454904,16458257,	0	ENSDARG00000078599.4	cmpl	cmpl	0,0,1,0,1,1,0,0,0,0,2,0,1,0,2,
ENSDART00000189245.1	chr1	+	16396869	16455921	16396928	16455921	14	16396869,16398767,16405944,16406127,16420420,16422604,16422777,16427926,16440840,16443214,16452796,16453376,16454839,16455914,	16397333,16398915,16405976,16406206,16420468,16422687,16422849,16427968,16440935,16443386,16452905,16453534,16454904,16455921,	0	ENSDARG00000078599.4	cmpl	cmpl	0,0,1,0,1,1,0,0,0,2,0,1,0,2,
ENSDART00000159794.2	chr1	+	16397062	16456501	16397062	16454908	12	16397062,16398767,16405944,16406127,16420420,16422604,16422777,16440840,16443214,16452796,16453376,16454839,	16397333,16398915,16405976,16406206,16420468,16422687,16422849,16440935,16443386,16452905,16453534,16456501,	0	ENSDARG00000078599.4	incmpl	cmpl	2,0,1,0,1,1,0,0,2,0,1,0,
ENSDART00000189735.1	chr1	+	16458524	16458740	16458740	16458740	1	16458524,	16458740,	0	ENSDARG00000115704.1	none	none	-1,
ENSDART00000185436.1	chr1	+	16458524	16458741	16458741	16458741	1	16458524,	16458741,	0	ENSDARG00000109375.1	none	none	-1,
ENSDART00000122959.3	chr1	-	16460123	16461398	16461398	16461398	1	16460123,	16461398,	0	ENSDARG00000091657.3	none	none	-1,
ENSDART00000078675.6	chr1	+	16463078	16480213	16463413	16479615	12	16463078,16466845,16467016,16470083,16470270,16473015,16474436,16476475,16476741,16477593,16479534,16479728,	16463523,16466920,16467134,16470181,16470481,16473086,16474564,16476534,16476810,16477737,16479633,16480213,	0	ENSDARG00000017119.10	cmpl	cmpl	0,2,2,0,2,0,2,1,0,0,0,-1,
ENSDART00000162389.2	chr1	+	16466770	16470347	16467107	16470347	4	16466770,16467016,16470083,16470270,	16466920,16467134,16470181,16470347,	0	ENSDARG00000017119.10	cmpl	incmpl	-1,0,0,2,
ENSDART00000169081.2	chr1	-	16484210	16507812	16484675	16507563	14	16484210,16487634,16488686,16492405,16494131,16495986,16498530,16498740,16500662,16500895,16503556,16504683,16506877,16507539,	16484740,16487789,16488821,16492606,16494181,16496112,16498640,16498873,16500797,16501024,16503714,16504846,16506997,16507812,	0	ENSDARG00000070412.7	cmpl	cmpl	1,2,2,2,0,0,1,0,0,0,1,0,0,0,
ENSDART00000164949.2	chr1	-	16506702	16507783	16507783	16507783	2	16506702,16507539,	16506997,16507783,	0	ENSDARG00000070412.7	none	none	-1,-1,
ENSDART00000048855.6	chr1	+	16548732	16617741	16548738	16617016	13	16548732,16559809,16564926,16568510,16590423,16604080,16609148,16612128,16612346,16612562,16613861,16614559,16616808,	16548964,16560001,16565067,16568624,16590653,16604147,16609363,16612234,16612420,16612658,16613978,16614657,16617741,	0	ENSDARG00000034105.7	cmpl	cmpl	0,1,1,1,1,0,1,0,1,0,0,0,2,
ENSDART00000166317.2	chr1	+	16573981	16612144	16574311	16612144	5	16573981,16590423,16604080,16609148,16612128,	16574432,16590653,16604147,16609363,16612144,	0	ENSDARG00000034105.7	cmpl	incmpl	0,1,0,1,0,
ENSDART00000187067.1	chr1	+	16574311	16619858	16574311	16617016	10	16574311,16590423,16604080,16609148,16612128,16612346,16612562,16613861,16614559,16616808,	16574432,16590653,16604147,16609363,16612234,16612420,16612658,16613978,16614657,16619858,	0	ENSDARG00000034105.7	cmpl	cmpl	0,1,0,1,0,1,0,0,0,2,
ENSDART00000162164.2	chr1	+	16600689	16616888	16600779	16616888	9	16600689,16604080,16609148,16612128,16612346,16612562,16613861,16614559,16616808,	16600842,16604147,16609363,16612234,16612420,16612658,16613978,16614657,16616888,	0	ENSDARG00000034105.7	cmpl	incmpl	0,0,1,0,1,0,0,0,2,
ENSDART00000171166.2	chr1	+	16600697	16614589	16614589	16614589	6	16600697,16604080,16609148,16612128,16613908,16614559,	16600842,16604147,16609363,16612234,16613978,16614589,	0	ENSDARG00000034105.7	none	none	-1,-1,-1,-1,-1,-1,
ENSDART00000149026.3	chr1	+	16621344	16654161	16625677	16653461	39	16621344,16625661,16626485,16626974,16629817,16633290,16633564,16634014,16634363,16634620,16634949,16635216,16635533,16635731,16635969,16637850,16638088,16638370,16638696,16639392,16639703,16639967,16641584,16642022,16642618,16643437,16643669,16643998,16646168,16646369,16646671,16646957,16647838,16649929,16650164,16650345,16650624,16650952,16653435,	16621461,16625779,16626731,16627274,16629988,16633468,16633674,16634261,16634514,16634815,16635113,16635452,16635652,16635861,16636134,16638014,16638283,16638620,16638842,16639568,16639830,16640320,16641746,16642079,16642791,16643569,16643802,16644145,16646272,16646504,16646869,16647017,16647959,16650081,16650234,16650536,16650717,16651076,16654161,	0	ENSDARG00000062198.7	cmpl	cmpl	-1,0,0,0,0,0,1,0,1,2,2,1,0,2,0,0,2,2,0,2,1,2,1,1,1,0,0,1,1,0,0,0,0,1,0,1,0,0,1,
ENSDART00000164899.2	chr1	+	16625677	16653461	16625677	16653461	40	16625677,16626485,16626974,16629817,16631700,16633307,16633564,16634014,16634368,16634620,16634949,16635216,16635533,16635731,16635969,16637850,16638088,16638370,16638696,16639392,16639703,16639967,16641584,16642022,16642618,16643437,16643669,16643998,16644854,16646189,16646369,16646671,16646957,16647838,16649929,16650164,16650345,16650624,16650952,16653435,	16625779,16626731,16627274,16629992,16631713,16633468,16633674,16634287,16634514,16634815,16635113,16635452,16635652,16635861,16636134,16638014,16638283,16638620,16638842,16639568,16639830,16640320,16641746,16642079,16642791,16643569,16643802,16644136,16644917,16646272,16646504,16646869,16647017,16647959,16650081,16650234,16650536,16650717,16651076,16653461,	0	ENSDARG00000062198.7	cmpl	cmpl	0,0,0,0,1,2,1,0,0,2,2,1,0,2,0,0,2,2,0,2,1,2,1,1,1,0,0,1,1,1,0,0,0,0,1,0,1,0,0,1,
ENSDART00000040434.7	chr1	-	16654253	16665044	16654695	16664948	14	16654253,16654879,16655025,16655921,16656756,16657578,16657804,16658044,16660179,16660339,16662168,16662452,16664550,16664870,	16654785,16654936,16655149,16656053,16656838,16657633,16657949,16658090,16660254,16660418,16662255,16662543,16664597,16665044,	0	ENSDARG00000034817.7	cmpl	cmpl	0,0,2,2,1,0,2,1,1,0,0,2,0,0,
ENSDART00000168555.2	chr1	-	16655701	16657853	16657853	16657853	4	16655701,16656756,16657578,16657804,	16656053,16656838,16657633,16657853,	0	ENSDARG00000034817.7	none	none	-1,-1,-1,-1,
ENSDART00000178599.2	chr1	-	16673840	16689023	16675630	16688874	9	16673840,16675908,16676109,16679667,16679898,16681497,16685788,16688585,16688815,	16675667,16676019,16676201,16679772,16680013,16681555,16685911,16688653,16689023,	0	ENSDARG00000056504.6	cmpl	cmpl	2,2,0,0,2,1,1,2,0,
ENSDART00000079001.5	chr1	-	16675263	16688965	16675630	16688874	10	16675263,16675487,16675908,16676109,16679667,16679898,16681497,16685788,16688585,16688815,	16675415,16675667,16676019,16676201,16679772,16680013,16681555,16685911,16688653,16688965,	0	ENSDARG00000056504.6	cmpl	cmpl	-1,2,2,0,0,2,1,1,2,0,
ENSDART00000162729.2	chr1	-	16675289	16685821	16675984	16685821	8	16675289,16675487,16675908,16676109,16679667,16679898,16681497,16685788,	16675415,16675667,16676015,16676201,16679772,16680013,16681555,16685821,	0	ENSDARG00000056504.6	cmpl	incmpl	-1,-1,2,0,0,2,1,1,
ENSDART00000159038.2	chr1	-	16675420	16676177	16675630	16676177	3	16675420,16675908,16676109,	16675667,16676019,16676177,	0	ENSDARG00000056504.6	cmpl	incmpl	2,2,0,
ENSDART00000158166.2	chr1	-	16679329	16688889	16688889	16688889	6	16679329,16679898,16681497,16685788,16688585,16688815,	16679772,16680013,16681555,16685911,16688653,16688889,	0	ENSDARG00000056504.6	none	none	-1,-1,-1,-1,-1,-1,
ENSDART00000174777.2	chr1	+	16768682	16768809	16768809	16768809	1	16768682,	16768809,	0	ENSDARG00000108673.2	none	none	-1,
ENSDART00000187712.1	chr1	-	16927723	16927939	16927939	16927939	1	16927723,	16927939,	0	ENSDARG00000110937.1	none	none	-1,
ENSDART00000186718.1	chr1	-	16930155	16930372	16930372	16930372	1	16930155,	16930372,	0	ENSDARG00000117129.1	none	none	-1,
ENSDART00000191450.1	chr1	-	16932585	16932801	16932801	16932801	1	16932585,	16932801,	0	ENSDARG00000116147.1	none	none	-1,
ENSDART00000189761.1	chr1	-	16935394	16935611	16935611	16935611	1	16935394,	16935611,	0	ENSDARG00000116406.1	none	none	-1,
ENSDART00000189694.1	chr1	-	16935395	16935611	16935611	16935611	1	16935395,	16935611,	0	ENSDARG00000111254.1	none	none	-1,
ENSDART00000188478.1	chr1	-	16937416	16937633	16937633	16937633	1	16937416,	16937633,	0	ENSDARG00000113731.1	none	none	-1,
ENSDART00000186149.1	chr1	-	16937417	16937633	16937633	16937633	1	16937417,	16937633,	0	ENSDARG00000115569.1	none	none	-1,
ENSDART00000191513.1	chr1	-	16939165	16939381	16939381	16939381	1	16939165,	16939381,	0	ENSDARG00000113149.1	none	none	-1,
ENSDART00000185464.1	chr1	-	16941214	16941430	16941430	16941430	1	16941214,	16941430,	0	ENSDARG00000116958.1	none	none	-1,
ENSDART00000135012.3	chr1	-	17330494	17361155	17361155	17361155	5	17330494,17341293,17341485,17341699,17360976,	17331068,17341398,17341572,17341731,17361155,	0	ENSDARG00000092109.3	none	none	-1,-1,-1,-1,-1,
ENSDART00000145068.3	chr1	+	17376921	17524922	17379291	17522508	27	17376921,17379266,17412649,17435370,17445846,17449073,17451910,17479744,17480290,17481191,17486392,17487023,17491462,17496215,17497300,17498116,17498344,17500122,17505003,17506278,17507520,17509598,17510790,17511847,17513165,17515069,17521837,	17377021,17382550,17412964,17435432,17446176,17449284,17452050,17480020,17480501,17485262,17486589,17487177,17491696,17496605,17497515,17498254,17498488,17500320,17505826,17506410,17507678,17510055,17510944,17511958,17513812,17515207,17524922,	0	ENSDARG00000017591.11	cmpl	cmpl	-1,0,1,1,0,0,1,0,0,1,1,0,1,1,1,0,0,0,0,1,1,0,1,2,2,1,1,
ENSDART00000146033.2	chr1	-	17465955	17466455	17466455	17466455	2	17465955,17466396,	17466097,17466455,	0	ENSDARG00000092708.2	none	none	-1,-1,
ENSDART00000131333.2	chr1	+	17513514	17522176	17522176	17522176	4	17513514,17515069,17520375,17521837,	17513812,17515207,17520411,17522176,	0	ENSDARG00000017591.11	none	none	-1,-1,-1,-1,
ENSDART00000139702.3	chr1	+	17527341	17531542	17528173	17531542	5	17527341,17527947,17529113,17531167,17531404,	17527453,17528217,17529256,17531296,17531542,	0	ENSDARG00000017905.9	cmpl	incmpl	-1,0,2,1,1,
ENSDART00000140076.3	chr1	+	17527377	17531527	17529147	17531527	4	17527377,17529113,17531167,17531404,	17527453,17529256,17531296,17531527,	0	ENSDARG00000017905.9	cmpl	incmpl	-1,0,1,1,
ENSDART00000005593.6	chr1	+	17527377	17536307	17528173	17534519	7	17527377,17527968,17529113,17531167,17531404,17531685,17534289,	17527453,17528217,17529256,17531296,17531580,17531812,17536307,	0	ENSDARG00000017905.9	cmpl	cmpl	-1,0,2,1,1,0,1,
ENSDART00000131927.2	chr1	+	17527930	17531812	17528173	17531812	5	17527930,17529113,17531167,17531404,17531685,	17528217,17529256,17531296,17531580,17531812,	0	ENSDARG00000017905.9	cmpl	incmpl	0,2,1,1,0,
ENSDART00000039917.7	chr1	-	17537450	17587552	17539648	17565870	21	17537450,17542049,17542888,17543447,17544510,17546567,17546771,17547038,17548709,17548939,17550751,17552629,17552942,17553895,17554028,17555183,17555392,17555943,17556115,17565675,17587501,	17539789,17542121,17542990,17543591,17544627,17546656,17546844,17547134,17548844,17549074,17550829,17552703,17552994,17553928,17554204,17555283,17555494,17556008,17556230,17565897,17587552,	0	ENSDARG00000030514.8	cmpl	cmpl	0,0,0,0,0,1,0,0,0,0,0,1,0,0,1,0,0,1,0,0,-1,
ENSDART00000125125.3	chr1	-	17538930	17569793	17539648	17565870	21	17538930,17542049,17542888,17543447,17544510,17546567,17546771,17547038,17548709,17548939,17550751,17552629,17552942,17553895,17554028,17555183,17555392,17555943,17556115,17565675,17569707,	17539789,17542121,17542990,17543591,17544627,17546656,17546844,17547134,17548844,17549074,17550829,17552703,17552994,17553928,17554204,17555283,17555494,17556008,17556230,17565897,17569793,	0	ENSDARG00000030514.8	cmpl	cmpl	0,0,0,0,0,1,0,0,0,0,0,1,0,0,1,0,0,1,0,0,-1,
ENSDART00000131293.2	chr1	-	17543540	17547267	17547267	17547267	5	17543540,17544510,17546567,17546771,17547038,	17543591,17544627,17546656,17546844,17547267,	0	ENSDARG00000030514.8	none	none	-1,-1,-1,-1,-1,
ENSDART00000146946.2	chr1	-	17555943	17570013	17555943	17565870	4	17555943,17556115,17565675,17569707,	17556008,17556230,17565897,17570013,	0	ENSDARG00000030514.8	incmpl	cmpl	1,0,0,-1,
ENSDART00000078889.4	chr1	+	17593391	17595045	17593437	17594953	4	17593391,17594137,17594324,17594516,	17593611,17594242,17594421,17595045,	0	ENSDARG00000056400.4	cmpl	cmpl	0,0,0,1,
ENSDART00000043484.8	chr1	-	17618014	17650223	17618256	17650158	7	17618014,17619714,17620666,17624140,17632128,17632843,17650138,	17618514,17619862,17620839,17624384,17632253,17632943,17650223,	0	ENSDARG00000042937.7	cmpl	cmpl	0,2,0,2,0,2,0,
ENSDART00000131559.2	chr1	-	17652387	17663108	17652387	17663108	3	17652387,17659340,17662960,	17652496,17659537,17663108,	0	ENSDARG00000092600.3	incmpl	incmpl	2,0,2,
ENSDART00000142689.2	chr1	-	17667932	17675037	17667932	17674819	5	17667932,17668159,17668308,17673093,17674512,	17668052,17668237,17668409,17673188,17675037,	0	ENSDARG00000092600.3	incmpl	cmpl	2,2,0,1,0,
ENSDART00000136279.2	chr1	-	17672759	17674970	17674970	17674970	2	17672759,17674512,	17673188,17674970,	0	ENSDARG00000092600.3	none	none	-1,-1,
ENSDART00000030665.7	chr1	+	17676744	17679089	17676818	17678626	4	17676744,17677681,17678248,17678468,	17676929,17678168,17678389,17679089,	0	ENSDARG00000027355.8	cmpl	cmpl	0,0,1,1,
ENSDART00000193160.1	chr1	-	17677372	17713483	17677372	17713483	7	17677372,17680809,17692037,17700110,17702213,17705262,17713468,	17677397,17680851,17692060,17700131,17702224,17705272,17713483,	0	ENSDARG00000092022.2	incmpl	incmpl	2,2,0,0,1,0,0,
ENSDART00000146258.3	chr1	-	17681043	17693273	17681483	17689832	5	17681043,17683182,17688641,17689003,17693056,	17681575,17683321,17688931,17689858,17693273,	0	ENSDARG00000056381.6	cmpl	cmpl	1,0,1,0,-1,
ENSDART00000181078.1	chr1	-	17681044	17689858	17681483	17689832	4	17681044,17683182,17688641,17689003,	17681575,17683321,17688931,17689858,	0	ENSDARG00000056381.6	cmpl	cmpl	1,0,1,0,
ENSDART00000103236.5	chr1	+	17695425	17698773	17695559	17698335	4	17695425,17695748,17696074,17698100,	17695583,17695901,17696166,17698773,	0	ENSDARG00000056376.6	cmpl	cmpl	0,0,0,2,
ENSDART00000148322.3	chr1	-	17699470	17711636	17699795	17711009	13	17699470,17701216,17701876,17702431,17702646,17704115,17708562,17710552,17710791,17710938,17711110,17711274,17711445,	17699882,17701341,17701953,17702556,17702811,17704262,17708755,17710707,17710852,17711031,17711122,17711353,17711636,	0	ENSDARG00000056369.7	cmpl	cmpl	0,1,2,0,0,0,2,0,2,0,-1,-1,-1,
ENSDART00000122670.4	chr1	-	17699476	17711676	17699795	17711594	12	17699476,17701216,17701876,17702431,17702646,17704115,17708562,17710552,17710791,17710938,17711274,17711591,	17699882,17701341,17701953,17702556,17702811,17704262,17708755,17710707,17710852,17711122,17711353,17711676,	0	ENSDARG00000056369.7	cmpl	cmpl	0,1,2,0,0,0,2,0,2,1,0,0,
ENSDART00000145162.2	chr1	-	17699481	17702810	17702810	17702810	4	17699481,17701216,17702431,17702646,	17699882,17701341,17702556,17702810,	0	ENSDARG00000056369.7	none	none	-1,-1,-1,-1,
ENSDART00000078848.6	chr1	-	17699486	17711361	17699795	17711009	11	17699486,17701216,17701876,17702431,17702646,17704115,17708562,17710552,17710791,17710938,17711272,	17699882,17701341,17701953,17702556,17702811,17704262,17708755,17710707,17710852,17711041,17711361,	0	ENSDARG00000056369.7	cmpl	cmpl	0,1,2,0,0,0,2,0,2,0,-1,
ENSDART00000133027.2	chr1	-	17712690	17715493	17713016	17714043	3	17712690,17713131,17715434,	17713040,17714157,17715493,	0	ENSDARG00000092022.2	cmpl	cmpl	0,0,-1,
ENSDART00000018238.9	chr1	-	17721852	17735861	17722393	17735822	7	17721852,17724320,17724960,17725229,17725497,17728173,17735729,	17722562,17724432,17725094,17725417,17725573,17728325,17735861,	0	ENSDARG00000011023.9	cmpl	cmpl	2,1,2,0,2,0,0,
ENSDART00000138475.3	chr1	-	17747655	17803614	17747948	17803614	21	17747655,17749512,17749700,17757125,17757381,17757610,17759898,17760273,17761114,17763240,17766411,17770477,17779161,17784102,17784285,17786086,17786829,17789444,17792870,17799627,17803518,	17748010,17749619,17749738,17757296,17757510,17757725,17759996,17760335,17762782,17763416,17766458,17770534,17779245,17784217,17784490,17786137,17786896,17789620,17792997,17799752,17803614,	0	ENSDARG00000003046.11	cmpl	incmpl	1,2,0,0,0,2,0,1,1,2,0,0,0,2,1,1,0,1,0,1,1,
ENSDART00000041215.7	chr1	-	17747948	17797802	17747948	17797802	19	17747948,17749512,17749700,17757125,17757381,17757610,17759898,17760273,17761114,17763240,17766411,17770477,17784102,17784285,17786086,17786829,17789444,17792870,17797268,	17748010,17749619,17749738,17757296,17757510,17757725,17759996,17760335,17762782,17763416,17766458,17770534,17784217,17784490,17786137,17786896,17789620,17792997,17797802,	0	ENSDARG00000003046.11	cmpl	cmpl	1,2,0,0,0,2,0,1,1,2,0,0,2,1,1,0,1,0,0,
ENSDART00000135263.2	chr1	+	17858379	17861928	17861928	17861928	2	17858379,17861888,	17858878,17861928,	0	ENSDARG00000095697.2	none	none	-1,-1,
ENSDART00000013021.9	chr1	+	17892943	17898227	17894123	17898020	5	17892943,17894083,17894995,17895692,17897791,	17893145,17894564,17895190,17897539,17898227,	0	ENSDARG00000016065.11	cmpl	cmpl	-1,0,0,0,2,
ENSDART00000089480.6	chr1	+	17900305	17912645	17900356	17911752	11	17900305,17900976,17901731,17902804,17903665,17906343,17906552,17909215,17910580,17911223,17911579,	17900546,17901089,17901817,17902995,17903735,17906470,17906726,17909318,17910715,17911403,17912645,	0	ENSDARG00000062132.6	cmpl	cmpl	0,1,0,2,1,2,0,0,1,1,1,
ENSDART00000138598.2	chr1	+	17909058	17911739	17911739	17911739	4	17909058,17910580,17911223,17911579,	17909318,17910715,17911403,17911739,	0	ENSDARG00000062132.6	none	none	-1,-1,-1,-1,
ENSDART00000194184.1	chr1	-	18002566	18004302	18004302	18004302	4	18002566,18003025,18003250,18003706,	18002660,18003147,18003310,18004302,	0	ENSDARG00000117687.1	none	none	-1,-1,-1,-1,
ENSDART00000194972.1	chr1	-	18002566	18004302	18004302	18004302	3	18002566,18003025,18003706,	18002660,18003310,18004302,	0	ENSDARG00000117687.1	none	none	-1,-1,-1,
ENSDART00000194199.1	chr1	-	18061681	18063577	18063577	18063577	4	18061681,18062922,18063143,18063493,	18062557,18063069,18063373,18063577,	0	ENSDARG00000117295.1	none	none	-1,-1,-1,-1,
ENSDART00000194348.1	chr1	-	18061681	18063577	18063577	18063577	3	18061681,18062922,18063143,	18062557,18063069,18063577,	0	ENSDARG00000117295.1	none	none	-1,-1,-1,
ENSDART00000194104.1	chr1	-	18061681	18063637	18063637	18063637	2	18061681,18062922,	18062557,18063637,	0	ENSDARG00000117295.1	none	none	-1,-1,
ENSDART00000143157.2	chr1	-	18187611	18237671	18237671	18237671	4	18187611,18234332,18234673,18237643,	18187867,18234450,18234793,18237671,	0	ENSDARG00000094943.2	none	none	-1,-1,-1,-1,
ENSDART00000188234.1	chr1	+	18234469	18315145	18234469	18315145	21	18234469,18243756,18253530,18255402,18257233,18257979,18262324,18264494,18266187,18266754,18268248,18268932,18273550,18294663,18296105,18297031,18297542,18297635,18306976,18310644,18315133,	18234504,18243769,18253547,18255425,18257258,18258023,18262349,18264502,18266221,18266770,18268268,18268940,18273569,18294672,18296120,18297035,18297558,18297667,18306987,18310657,18315145,	0	ENSDARG00000115616.1	incmpl	incmpl	0,2,0,2,1,2,1,2,1,2,0,2,1,2,2,2,0,1,0,2,0,
ENSDART00000134641.2	chr1	-	18234506	18237587	18237587	18237587	2	18234506,18237558,	18234793,18237587,	0	ENSDARG00000094943.2	none	none	-1,-1,
ENSDART00000054674.5	chr1	-	18251334	18336878	18251858	18336649	2	18251334,18336465,	18252727,18336878,	0	ENSDARG00000037545.5	cmpl	cmpl	1,0,
ENSDART00000134561.2	chr1	-	18252613	18336838	18254625	18336649	3	18252613,18254380,18336465,	18252727,18254669,18336838,	0	ENSDARG00000037545.5	cmpl	cmpl	-1,1,0,
ENSDART00000089442.5	chr1	-	18363832	18446161	18363977	18446161	11	18363832,18368231,18373275,18375620,18377607,18384456,18399307,18403941,18405692,18421176,18445598,	18364034,18368403,18373488,18375783,18377832,18384643,18399520,18404138,18405829,18421359,18446161,	0	ENSDARG00000062122.6	cmpl	cmpl	0,2,2,1,1,0,0,1,2,2,0,
ENSDART00000142515.2	chr1	+	18550863	18563321	18550879	18563321	6	18550863,18556106,18556412,18557944,18560441,18563240,	18550970,18556304,18556574,18558058,18560528,18563321,	0	ENSDARG00000095111.2	cmpl	incmpl	0,1,1,1,1,1,
ENSDART00000082063.7	chr1	-	18575746	18592068	18576135	18587437	13	18575746,18576617,18578250,18578416,18581052,18581371,18584120,18584937,18586245,18586535,18586971,18587143,18591870,	18576261,18576671,18578323,18578556,18581238,18581457,18584247,18585090,18586380,18586717,18587056,18587443,18592068,	0	ENSDARG00000008287.11	cmpl	cmpl	0,0,2,0,0,1,0,0,0,1,0,0,-1,
ENSDART00000147228.2	chr1	-	18578250	18585046	18578250	18585046	6	18578250,18578416,18581052,18581371,18584081,18584937,	18578323,18578556,18581238,18581457,18584247,18585046,	0	ENSDARG00000008287.11	incmpl	incmpl	2,0,0,1,0,2,
ENSDART00000131548.2	chr1	-	18584947	18587198	18587198	18587198	4	18584947,18586535,18586971,18587143,	18585090,18586717,18587056,18587198,	0	ENSDARG00000008287.11	none	none	-1,-1,-1,-1,
ENSDART00000014916.8	chr1	-	18594145	18615063	18596206	18606291	7	18594145,18598561,18601119,18601505,18603749,18606261,18614880,	18596388,18598701,18601258,18601659,18604091,18606310,18615063,	0	ENSDARG00000015495.9	cmpl	cmpl	1,2,1,0,0,0,-1,
ENSDART00000139550.2	chr1	-	18605634	18614974	18614974	18614974	2	18605634,18614880,	18606310,18614974,	0	ENSDARG00000015495.9	none	none	-1,-1,
ENSDART00000191493.1	chr1	-	18642116	18772311	18642116	18772311	23	18642116,18646644,18650569,18655027,18658062,18660034,18667788,18668816,18689756,18698413,18704469,18709024,18709261,18711657,18712334,18716170,18716715,18717877,18723411,18726354,18770038,18772035,18772093,	18642130,18646804,18650746,18655197,18658222,18660279,18667950,18668978,18689945,18698544,18704735,18709126,18709372,18711768,18712426,18716303,18716820,18717967,18723603,18726648,18770275,18772069,18772311,	0	ENSDARG00000062081.8	cmpl	cmpl	1,0,0,1,0,1,1,1,1,2,0,0,0,0,1,0,0,0,0,0,0,2,0,
ENSDART00000193094.1	chr1	-	18644203	18752981	18646597	18752387	20	18644203,18650569,18655027,18658062,18660034,18667788,18668816,18689756,18698413,18704469,18709039,18709261,18711657,18712334,18716170,18716715,18717877,18723411,18726354,18752312,	18646804,18650746,18655197,18658222,18660279,18667950,18668978,18689945,18698544,18704750,18709126,18709372,18711768,18712426,18716303,18716820,18717967,18723603,18726648,18752981,	0	ENSDARG00000062081.8	cmpl	cmpl	0,0,1,0,1,1,1,1,2,0,0,0,0,1,0,0,0,0,0,0,
ENSDART00000188146.1	chr1	-	18644203	18752981	18646597	18752387	21	18644203,18650569,18655027,18658062,18660034,18667788,18668816,18689756,18698413,18701853,18704469,18709039,18709261,18711657,18712334,18716170,18716715,18717877,18723411,18726354,18752312,	18646804,18650746,18655197,18658222,18660279,18667950,18668978,18689945,18698544,18701952,18704750,18709126,18709372,18711768,18712426,18716303,18716820,18717967,18723603,18726648,18752981,	0	ENSDARG00000062081.8	cmpl	cmpl	0,0,1,0,1,1,1,1,2,2,0,0,0,0,1,0,0,0,0,0,0,
ENSDART00000147525.3	chr1	-	18645347	18772241	18646597	18772241	22	18645347,18650569,18655027,18658062,18660034,18667788,18668816,18689756,18698413,18701853,18704469,18709039,18709261,18711657,18712334,18716170,18716715,18717877,18723411,18726354,18770038,18772035,	18646804,18650746,18655197,18658222,18660279,18667950,18668978,18689945,18698544,18701952,18704750,18709126,18709372,18711768,18712426,18716303,18716820,18717967,18723603,18726648,18770275,18772241,	0	ENSDARG00000062081.8	cmpl	incmpl	0,0,1,0,1,1,1,1,2,2,0,0,0,0,1,0,0,0,0,0,0,1,
ENSDART00000133194.3	chr1	-	18645347	18772241	18646597	18772241	23	18645347,18650569,18655027,18658062,18660034,18667788,18668816,18689756,18698413,18699654,18701853,18704469,18709039,18709261,18711657,18712334,18716170,18716715,18717877,18723411,18726354,18770038,18772035,	18646804,18650746,18655197,18658222,18660279,18667950,18668978,18689945,18698544,18699774,18701952,18704750,18709126,18709372,18711768,18712426,18716303,18716820,18717967,18723603,18726648,18770275,18772241,	0	ENSDARG00000062081.8	cmpl	incmpl	0,0,1,0,1,1,1,1,2,2,2,0,0,0,0,1,0,0,0,0,0,0,1,
ENSDART00000147645.2	chr1	-	18645347	18772241	18646597	18772241	21	18645347,18650569,18655027,18658062,18660034,18667788,18668816,18689756,18698413,18704469,18709039,18709261,18711657,18712334,18716170,18716715,18717877,18723411,18726354,18770038,18772035,	18646804,18650746,18655197,18658222,18660279,18667950,18668978,18689945,18698544,18704750,18709126,18709372,18711768,18712426,18716303,18716820,18717967,18723603,18726648,18770275,18772241,	0	ENSDARG00000062081.8	cmpl	incmpl	0,0,1,0,1,1,1,1,2,0,0,0,0,1,0,0,0,0,0,0,1,
ENSDART00000140981.2	chr1	-	18716177	18752464	18752464	18752464	6	18716177,18716715,18717877,18723411,18726354,18752312,	18716303,18716820,18717967,18723603,18726648,18752464,	0	ENSDARG00000062081.8	none	none	-1,-1,-1,-1,-1,-1,
ENSDART00000139190.2	chr1	-	18726358	18741618	18741618	18741618	2	18726358,18741509,	18726648,18741618,	0	ENSDARG00000062081.8	none	none	-1,-1,
ENSDART00000020970.8	chr1	-	18779167	18803919	18780641	18803792	13	18779167,18784488,18784703,18784989,18787578,18788343,18788601,18789209,18791477,18791777,18797391,18799440,18803717,	18780744,18784622,18784893,18785119,18787672,18788527,18788699,18789399,18791671,18791861,18797583,18799608,18803919,	0	ENSDARG00000018178.8	cmpl	cmpl	2,0,2,1,0,2,0,2,0,0,0,0,0,
ENSDART00000131423.2	chr1	-	18810890	18811484	18811484	18811484	3	18810890,18811248,18811445,	18811169,18811364,18811484,	0	ENSDARG00000093886.3	none	none	-1,-1,-1,
ENSDART00000146769.3	chr1	-	18810890	18811484	18811484	18811484	3	18810890,18811248,18811441,	18811169,18811361,18811484,	0	ENSDARG00000093886.3	none	none	-1,-1,-1,
ENSDART00000142026.2	chr1	-	18810890	18811517	18811137	18811348	3	18810890,18811248,18811445,	18811169,18811366,18811517,	0	ENSDARG00000093886.3	cmpl	cmpl	1,0,-1,
ENSDART00000145534.2	chr1	-	18810893	18811484	18811484	18811484	2	18810893,18811248,	18811169,18811484,	0	ENSDARG00000093886.3	none	none	-1,-1,
ENSDART00000137171.2	chr1	-	18810894	18811483	18811483	18811483	3	18810894,18811248,18811445,	18811205,18811366,18811483,	0	ENSDARG00000093886.3	none	none	-1,-1,-1,
ENSDART00000078610.4	chr1	+	18811678	18816806	18815868	18816717	2	18811678,18815788,	18812015,18816806,	0	ENSDARG00000056163.4	cmpl	cmpl	-1,0,
ENSDART00000146410.3	chr1	-	18841461	18849029	18842154	18848931	4	18841461,18844004,18844151,18848888,	18842204,18844059,18844246,18849029,	0	ENSDARG00000079488.5	cmpl	cmpl	1,0,1,0,
ENSDART00000109294.4	chr1	-	18841635	18848955	18842154	18848931	4	18841635,18844004,18844151,18848888,	18842201,18844059,18844246,18848955,	0	ENSDARG00000079488.5	cmpl	cmpl	1,0,1,0,
ENSDART00000139241.2	chr1	+	18863059	18933671	18867505	18933072	13	18863059,18867427,18894612,18920230,18921490,18923664,18924219,18926054,18926303,18928398,18928586,18929693,18933009,	18863185,18868037,18894674,18920424,18921746,18923844,18924378,18926216,18926407,18928486,18928708,18929793,18933671,	0	ENSDARG00000062055.7	cmpl	cmpl	-1,0,1,0,2,0,0,0,0,2,0,2,0,
ENSDART00000184180.1	chr1	+	18867505	18933072	18867505	18933072	13	18867505,18867878,18894612,18920230,18921490,18923664,18924219,18926054,18926303,18928398,18928586,18929693,18933009,	18867842,18868037,18894674,18920424,18921746,18923844,18924378,18926216,18926407,18928486,18928708,18929793,18933072,	0	ENSDARG00000062055.7	cmpl	cmpl	0,1,1,0,2,0,0,0,0,2,0,2,0,
ENSDART00000193777.1	chr1	+	18920212	18933072	18920212	18933072	11	18920212,18921490,18923673,18923748,18924219,18926054,18926303,18928398,18928586,18929693,18933009,	18920424,18921746,18923727,18923844,18924378,18926216,18926407,18928486,18928708,18929793,18933072,	0	ENSDARG00000062055.7	cmpl	cmpl	0,2,0,0,0,0,0,2,0,2,0,
ENSDART00000132379.2	chr1	+	18965749	19066327	18965969	19066153	22	18965749,18997484,18998546,18999013,19001954,19002067,19002257,19007161,19034357,19034577,19036318,19046330,19047657,19055454,19058473,19058637,19060229,19061430,19061778,19065510,19065690,19066127,	18966071,18997555,18998616,18999120,19001985,19002178,19002459,19007393,19034490,19034735,19036790,19046637,19047776,19055568,19058566,19058843,19060327,19061539,19061865,19065619,19065793,19066327,	0	ENSDARG00000074275.5	cmpl	cmpl	0,0,2,0,2,0,0,1,2,0,2,0,1,0,0,0,2,1,2,2,0,1,
ENSDART00000137940.2	chr1	+	18965814	18999546	18999546	18999546	4	18965814,18997484,18998546,18999013,	18966071,18997555,18998616,18999546,	0	ENSDARG00000074275.5	none	none	-1,-1,-1,-1,
ENSDART00000141795.2	chr1	-	19074325	19079957	19074453	19078631	3	19074325,19078457,19079695,	19074747,19078645,19079957,	0	ENSDARG00000075330.5	cmpl	cmpl	0,0,-1,
ENSDART00000002886.8	chr1	+	19083500	19092155	19083607	19092051	12	19083500,19083819,19084289,19084505,19086480,19086719,19088351,19089985,19090301,19090580,19091846,19092020,	19083673,19083914,19084409,19084608,19086618,19086802,19088484,19090074,19090448,19090699,19091904,19092155,	0	ENSDARG00000006392.9	cmpl	cmpl	0,0,2,2,0,0,2,0,2,2,1,2,
ENSDART00000131948.2	chr1	+	19083531	19090323	19083607	19090323	8	19083531,19083819,19084505,19086480,19086719,19088351,19089985,19090301,	19083673,19083914,19084608,19086618,19086802,19088484,19090074,19090323,	0	ENSDARG00000006392.9	cmpl	incmpl	0,0,2,0,0,2,0,2,
ENSDART00000114514.4	chr1	+	19094547	19112934	19094578	19112668	13	19094547,19098329,19098570,19101275,19101497,19104533,19105086,19107255,19108122,19108285,19108947,19110870,19112444,	19094608,19098473,19098660,19101400,19101603,19104644,19105916,19107352,19108192,19108364,19109098,19111078,19112934,	0	ENSDARG00000073902.4	cmpl	cmpl	0,0,0,0,2,0,0,2,0,1,2,0,1,
ENSDART00000131579.3	chr1	-	19122919	19237612	19123609	19215336	34	19122919,19124097,19127945,19128637,19130357,19130568,19132805,19137203,19141085,19144869,19147478,19152760,19157002,19157227,19159209,19161857,19162387,19163921,19169140,19169722,19179061,19179593,19182147,19182638,19188382,19188614,19191768,19193285,19195432,19205679,19209350,19209679,19215248,19237357,	19123678,19124233,19128100,19128763,19130484,19130747,19133091,19137358,19141205,19145045,19147602,19152858,19157118,19157239,19159370,19162067,19162481,19164178,19169238,19170376,19179179,19179620,19182341,19182941,19188524,19188757,19192350,19193555,19195543,19205865,19209492,19209825,19215392,19237612,	0	ENSDARG00000019945.13	cmpl	cmpl	0,2,0,0,2,0,2,0,0,1,0,1,2,2,0,0,2,0,1,1,0,0,1,1,0,1,1,1,1,1,0,1,0,-1,
ENSDART00000170680.2	chr1	-	19123609	19215336	19123609	19215336	31	19123609,19124097,19127945,19128637,19130357,19130568,19132805,19137203,19141085,19144869,19147478,19152760,19157002,19157227,19159209,19161857,19162387,19163921,19169140,19188382,19188614,19191768,19193285,19195231,19195432,19200416,19202493,19205679,19209350,19209679,19215248,	19123678,19124233,19128100,19128763,19130484,19130747,19133091,19137358,19141205,19145045,19147602,19152858,19157118,19157239,19159370,19162067,19162481,19164178,19169238,19188524,19188757,19192350,19193555,19195243,19195543,19200434,19202502,19205865,19209492,19209825,19215336,	0	ENSDARG00000019945.13	cmpl	cmpl	0,2,0,0,2,0,2,0,0,1,0,1,2,2,0,0,2,0,1,0,1,1,1,1,1,1,1,1,0,1,0,
ENSDART00000162949.2	chr1	-	19123609	19215336	19123609	19215336	33	19123609,19124097,19127945,19128637,19130357,19130568,19132805,19137203,19141085,19144869,19147478,19152760,19157002,19157227,19159209,19161857,19162387,19163921,19169140,19169722,19179061,19179593,19182147,19182638,19188382,19188614,19191768,19193285,19195432,19205679,19209350,19209679,19215248,	19123678,19124233,19128100,19128763,19130484,19130747,19133091,19137358,19141205,19145045,19147602,19152858,19157118,19157239,19159370,19162067,19162481,19164178,19169238,19170376,19179179,19179620,19182341,19182941,19188524,19188757,19192350,19193555,19195543,19205865,19209492,19209825,19215336,	0	ENSDARG00000019945.13	cmpl	cmpl	0,2,0,0,2,0,2,0,0,1,0,1,2,2,0,0,2,0,1,1,0,0,1,1,0,1,1,1,1,1,0,1,0,
ENSDART00000127145.4	chr1	-	19205196	19233890	19205623	19215336	5	19205196,19209350,19209679,19215248,19233851,	19205865,19209492,19209825,19215392,19233890,	0	ENSDARG00000019945.13	cmpl	cmpl	1,0,1,0,-1,
ENSDART00000143663.2	chr1	-	19205559	19237576	19205623	19215336	5	19205559,19209350,19209679,19215248,19237357,	19205865,19209492,19209825,19215392,19237576,	0	ENSDARG00000019945.13	cmpl	cmpl	1,0,1,0,-1,
ENSDART00000129970.3	chr1	+	19303240	19331532	19303380	19329281	7	19303240,19307412,19315110,19315281,19317570,19328979,19329157,	19303444,19308372,19315182,19315461,19317691,19329060,19331532,	0	ENSDARG00000086957.4	cmpl	cmpl	0,1,1,1,1,2,2,
ENSDART00000078594.4	chr1	+	19332836	19346048	19334976	19345739	8	19332836,19334975,19336603,19338447,19340884,19341187,19341480,19345539,	19332914,19335331,19336926,19338652,19341052,19341367,19341630,19346048,	0	ENSDARG00000056151.4	cmpl	cmpl	-1,0,1,0,1,1,1,1,
ENSDART00000135552.2	chr1	-	19353047	19402802	19358098	19369361	7	19353047,19361164,19363874,19366019,19368668,19388084,19402582,	19358344,19361355,19364078,19366488,19369392,19388201,19402802,	0	ENSDARG00000061985.7	cmpl	cmpl	0,1,1,0,0,-1,-1,
ENSDART00000134861.2	chr1	-	19361204	19366174	19366174	19366174	2	19361204,19366019,	19361355,19366174,	0	ENSDARG00000061985.7	none	none	-1,-1,
ENSDART00000145224.2	chr1	-	19368996	19402815	19402815	19402815	3	19368996,19388109,19402582,	19369170,19388201,19402815,	0	ENSDARG00000061985.7	none	none	-1,-1,-1,
ENSDART00000089025.6	chr1	-	19418379	19431510	19418795	19431393	13	19418379,19422547,19422785,19422939,19424732,19424911,19425117,19426174,19426424,19428989,19430939,19431089,19431297,	19418982,19422660,19422865,19423042,19424821,19425036,19425276,19426339,19426584,19429095,19430994,19431205,19431510,	0	ENSDARG00000061981.6	cmpl	cmpl	2,0,1,0,1,2,2,2,1,0,2,0,0,
ENSDART00000133959.3	chr1	+	19433003	19466453	19434287	19466058	21	19433003,19434197,19435695,19437417,19439815,19440067,19440283,19443931,19444140,19444405,19444572,19446338,19446576,19454369,19454599,19454806,19457966,19458926,19461727,19461940,19465866,	19433352,19434304,19435755,19437566,19439907,19440157,19440401,19444045,19444259,19444488,19444679,19446486,19446652,19454508,19454694,19454920,19458107,19459160,19461837,19462205,19466453,	0	ENSDARG00000003631.10	cmpl	cmpl	-1,0,2,2,1,0,0,1,1,0,2,1,2,0,1,0,0,0,0,2,0,
ENSDART00000144403.2	chr1	+	19433006	19437677	19437677	19437677	4	19433006,19434197,19435695,19437417,	19433352,19434304,19435755,19437677,	0	ENSDARG00000003631.10	none	none	-1,-1,-1,-1,
ENSDART00000012552.9	chr1	+	19434197	19466452	19434287	19466058	20	19434197,19435695,19437417,19439815,19440067,19440283,19443931,19444140,19444405,19444572,19446338,19446576,19454369,19454599,19454806,19457966,19458926,19461727,19461940,19465866,	19434304,19435755,19437566,19439907,19440157,19440401,19444045,19444259,19444488,19444679,19446486,19446652,19454508,19454694,19454920,19458107,19459160,19461837,19462205,19466452,	0	ENSDARG00000003631.10	cmpl	cmpl	0,2,2,1,0,0,1,1,0,2,1,2,0,1,0,0,0,0,2,0,
ENSDART00000133758.2	chr1	+	19458979	19462463	19462463	19462463	3	19458979,19461727,19461940,	19459160,19461837,19462463,	0	ENSDARG00000003631.10	none	none	-1,-1,-1,
ENSDART00000136307.2	chr1	+	19461924	19466220	19466220	19466220	2	19461924,19465866,	19462205,19466220,	0	ENSDARG00000003631.10	none	none	-1,-1,
ENSDART00000044030.7	chr1	-	19473027	19502351	19473027	19502322	21	19473027,19473272,19477229,19477441,19479890,19480161,19480360,19480532,19483883,19484334,19485294,19485512,19489556,19490889,19491106,19494346,19494817,19495085,19497253,19499787,19502267,	19473186,19473378,19477329,19477553,19480013,19480262,19480422,19480671,19483994,19484439,19485421,19485619,19489741,19491004,19491222,19494533,19494986,19495225,19497538,19500057,19502351,	0	ENSDARG00000056133.8	cmpl	cmpl	0,2,1,0,0,1,2,1,1,1,0,1,2,1,2,1,0,1,1,1,0,
ENSDART00000181888.1	chr1	-	19473027	19502322	19473176	19502322	20	19473027,19477229,19477441,19479890,19480161,19480360,19480532,19483883,19484334,19485294,19485512,19489556,19490889,19491106,19494346,19494817,19495085,19497253,19499787,19502267,	19473378,19477329,19477553,19480013,19480262,19480422,19480671,19483994,19484439,19485421,19485619,19489741,19491004,19491222,19494533,19494986,19495225,19497538,19500057,19502322,	0	ENSDARG00000056133.8	cmpl	cmpl	2,1,0,0,1,2,1,1,1,0,1,2,1,2,1,0,1,1,1,0,
ENSDART00000124260.3	chr1	-	19496923	19502378	19502378	19502378	3	19496923,19499787,19502267,	19497538,19500057,19502378,	0	ENSDARG00000056133.8	none	none	-1,-1,-1,
ENSDART00000103091.3	chr1	+	19515227	19517791	19515475	19517791	3	19515227,19517253,19517522,	19515728,19517433,19517791,	0	ENSDARG00000070321.3	cmpl	cmpl	0,1,1,
ENSDART00000135274.2	chr1	+	19535119	19539639	19539639	19539639	3	19535119,19539294,19539535,	19535306,19539444,19539639,	0	ENSDARG00000017744.10	none	none	-1,-1,-1,
ENSDART00000103089.5	chr1	+	19535143	19537359	19535185	19537066	3	19535143,19535504,19536799,	19535306,19535668,19537359,	0	ENSDARG00000070320.5	cmpl	cmpl	0,1,0,
ENSDART00000109416.4	chr1	+	19538298	19561801	19538393	19561423	24	19538298,19539294,19539535,19540399,19540542,19540738,19541371,19544461,19545893,19548090,19548619,19548843,19549832,19550045,19550588,19550809,19551044,19553356,19553612,19554225,19557374,19557592,19557940,19561240,	19538561,19539444,19539658,19540438,19540653,19540783,19541605,19544611,19546127,19548250,19548737,19548982,19549952,19550250,19550724,19550934,19551238,19553500,19553807,19554426,19557491,19557753,19558088,19561801,	0	ENSDARG00000017744.10	cmpl	cmpl	0,0,0,0,0,0,0,0,0,0,1,2,0,0,1,2,1,0,0,0,0,0,2,0,
ENSDART00000088949.7	chr1	-	19562751	19599242	19563506	19599233	49	19562751,19566318,19566641,19569470,19569690,19570026,19570368,19571082,19572559,19573017,19573173,19574330,19574480,19574766,19575687,19576406,19576619,19576752,19577776,19577949,19578199,19578446,19578941,19579174,19579306,19580498,19580748,19581039,19584086,19584316,19584895,19587067,19587393,19588838,19589046,19589298,19589510,19590039,19590768,19591020,19591192,19591433,19591598,19593045,195…	19563646,19566471,19566730,19569576,19569835,19570219,19570412,19571294,19572751,19573084,19573265,19574397,19574570,19574859,19575838,19576525,19576667,19576858,19577856,19578117,19578317,19578515,19579056,19579229,19579452,19580622,19580850,19581212,19584228,19584451,19584987,19587287,19587474,19588962,19589150,19589421,19589577,19590089,19590844,19591106,19591312,19591512,19591738,19593217,195…	0	ENSDARG00000061952.7	cmpl	cmpl	1,1,2,1,0,2,0,1,1,0,1,0,0,0,2,0,0,2,0,0,2,2,1,0,1,0,0,1,0,0,1,0,0,2,0,0,2,0,2,0,0,2,0,2,2,0,0,1,0,
ENSDART00000131614.2	chr1	-	19570188	19573123	19573123	19573123	5	19570188,19570368,19571082,19572559,19573017,	19570219,19570412,19571294,19572751,19573123,	0	ENSDARG00000061952.7	none	none	-1,-1,-1,-1,-1,
ENSDART00000146455.2	chr1	-	19575552	19576814	19576814	19576814	4	19575552,19576406,19576619,19576752,	19575838,19576525,19576667,19576814,	0	ENSDARG00000061952.7	none	none	-1,-1,-1,-1,
ENSDART00000111555.3	chr1	+	19602388	19632153	19604455	19632153	11	19602388,19604417,19606668,19609484,19611362,19614740,19614965,19616705,19619063,19629148,19631975,	19602484,19605046,19607487,19609634,19611499,19614811,19615118,19617008,19619374,19629330,19632153,	0	ENSDARG00000061936.7	cmpl	cmpl	-1,0,0,0,0,2,1,1,1,0,2,
ENSDART00000141579.3	chr1	+	19602388	19632153	19604455	19632153	12	19602388,19604417,19606668,19609484,19611362,19614740,19614965,19616705,19619063,19625920,19629148,19631975,	19602484,19605046,19607487,19609634,19611499,19614811,19615118,19617008,19619374,19626073,19629330,19632153,	0	ENSDARG00000061936.7	cmpl	cmpl	-1,0,0,0,0,2,1,1,1,0,0,2,
ENSDART00000088933.7	chr1	+	19602388	19609673	19604455	19609673	4	19602388,19604417,19606668,19609484,	19602484,19605046,19607487,19609673,	0	ENSDARG00000061936.7	cmpl	incmpl	-1,0,0,0,
ENSDART00000143077.2	chr1	+	19616798	19632086	19616798	19632086	4	19616798,19619063,19629148,19631975,	19617008,19619374,19629330,19632086,	0	ENSDARG00000061936.7	incmpl	incmpl	1,1,0,2,
ENSDART00000054574.6	chr1	-	19637311	19648227	19637433	19648192	12	19637311,19639780,19639996,19640241,19641681,19641863,19643740,19645600,19647453,19647618,19647808,19648134,	19637599,19639912,19640078,19640372,19641778,19641974,19643885,19645653,19647539,19647695,19647912,19648227,	0	ENSDARG00000006434.10	cmpl	cmpl	2,2,1,2,1,1,0,1,2,0,1,0,
ENSDART00000147274.3	chr1	-	19637311	19641751	19641751	19641751	5	19637311,19639780,19639996,19640241,19641681,	19637622,19639912,19640078,19640372,19641751,	0	ENSDARG00000006434.10	none	none	-1,-1,-1,-1,-1,
ENSDART00000141660.3	chr1	-	19639373	19641950	19641950	19641950	5	19639373,19639996,19640241,19641681,19641863,	19639912,19640078,19640372,19641778,19641950,	0	ENSDARG00000006434.10	none	none	-1,-1,-1,-1,-1,
ENSDART00000146688.2	chr1	-	19640254	19648182	19648182	19648182	8	19640254,19641681,19641863,19643740,19645600,19647453,19647808,19648134,	19640372,19641778,19641974,19643885,19645653,19647695,19647912,19648182,	0	ENSDARG00000006434.10	none	none	-1,-1,-1,-1,-1,-1,-1,-1,
ENSDART00000054575.6	chr1	+	19649544	19665774	19649616	19665027	6	19649544,19650215,19652070,19653796,19663908,19664903,	19649652,19650368,19652332,19653934,19664011,19665774,	0	ENSDARG00000037484.6	cmpl	cmpl	0,0,0,1,1,2,
ENSDART00000129853.3	chr1	-	19667946	19673870	19668253	19673579	2	19667946,19673491,	19668315,19673870,	0	ENSDARG00000094729.2	cmpl	cmpl	1,0,
ENSDART00000148219.2	chr1	-	19667947	19673900	19670672	19673579	3	19667947,19670671,19673491,	19668315,19670761,19673900,	0	ENSDARG00000094729.2	cmpl	cmpl	-1,1,0,
ENSDART00000143303.4	chr1	-	19689748	19694720	19694720	19694720	3	19689748,19692020,19694497,	19691618,19692148,19694720,	0	ENSDARG00000095388.4	none	none	-1,-1,-1,
ENSDART00000142561.2	chr1	-	19690865	19694326	19694326	19694326	3	19690865,19692020,19694259,	19691618,19692148,19694326,	0	ENSDARG00000095388.4	none	none	-1,-1,-1,
ENSDART00000120760.2	chr1	+	19705698	19705832	19705832	19705832	1	19705698,	19705832,	0	ENSDARG00000085360.2	none	none	-1,
ENSDART00000054581.6	chr1	+	19708507	19756237	19708507	19756237	7	19708507,19734038,19734166,19742357,19745217,19751769,19755920,	19708600,19734089,19734246,19742999,19745398,19751917,19756237,	0	ENSDARG00000037487.7	cmpl	cmpl	0,0,0,2,2,0,1,
ENSDART00000131206.3	chr1	+	19708507	19756359	19708507	19756237	6	19708507,19734038,19734166,19745217,19751769,19755920,	19708600,19734089,19734246,19745398,19751917,19756359,	0	ENSDARG00000037487.7	cmpl	cmpl	0,0,0,2,0,1,
ENSDART00000005733.8	chr1	-	19759369	19764038	19760781	19763934	7	19759369,19761029,19762677,19762900,19763591,19763739,19763931,	19760938,19761072,19762826,19762985,19763629,19763849,19764038,	0	ENSDARG00000008068.8	cmpl	cmpl	2,1,2,1,2,0,0,
ENSDART00000137496.2	chr1	-	19760577	19763921	19763921	19763921	6	19760577,19761029,19762677,19762900,19763591,19763739,	19760938,19761072,19762826,19762985,19763629,19763921,	0	ENSDARG00000008068.8	none	none	-1,-1,-1,-1,-1,-1,
ENSDART00000138276.2	chr1	+	19764994	19802602	19765044	19802602	19	19764994,19779123,19781698,19781909,19782094,19782276,19783462,19784222,19785146,19787872,19788087,19789865,19792290,19792704,19795864,19798781,19799704,19801123,19802523,	19765136,19779247,19781791,19782010,19782172,19782338,19783483,19784285,19785218,19788008,19788289,19789954,19792437,19792874,19796555,19798938,19799905,19801239,19802602,	0	ENSDARG00000077648.5	cmpl	cmpl	0,2,0,0,2,2,1,1,1,1,2,0,2,2,1,2,0,0,2,
ENSDART00000152179.2	chr1	-	19787280	19788211	19788211	19788211	2	19787280,19788109,	19788005,19788211,	0	ENSDARG00000096580.2	none	none	-1,-1,
ENSDART00000113832.4	chr1	+	19808407	19819096	19819096	19819096	3	19808407,19815236,19818058,	19808614,19816328,19819096,	0	ENSDARG00000079250.5	none	none	-1,-1,-1,
ENSDART00000143559.2	chr1	+	19808450	19815449	19815449	19815449	2	19808450,19815236,	19808614,19815449,	0	ENSDARG00000079250.5	none	none	-1,-1,
ENSDART00000180175.1	chr1	+	19814864	19819096	19819096	19819096	2	19814864,19818058,	19816328,19819096,	0	ENSDARG00000079250.5	none	none	-1,-1,
ENSDART00000147502.3	chr1	-	19835802	19845539	19836992	19845331	9	19835802,19837198,19839045,19839434,19841363,19841526,19843217,19843370,19845179,	19837114,19837329,19839181,19839539,19841452,19841643,19843290,19843501,19845539,	0	ENSDARG00000019986.11	cmpl	cmpl	1,2,1,1,2,2,1,2,0,
ENSDART00000132958.3	chr1	-	19836870	19845399	19836992	19845331	9	19836870,19837198,19839045,19839434,19841363,19841526,19843217,19843370,19845179,	19837114,19837329,19839181,19839539,19841452,19841673,19843290,19843501,19845399,	0	ENSDARG00000019986.11	cmpl	cmpl	1,2,1,1,2,2,1,2,0,
ENSDART00000143338.3	chr1	-	19838912	19845389	19845389	19845389	6	19838912,19839434,19841363,19843217,19843370,19845179,	19839181,19839539,19841643,19843290,19843501,19845389,	0	ENSDARG00000019986.11	none	none	-1,-1,-1,-1,-1,-1,
ENSDART00000139314.2	chr1	-	19839045	19845378	19839045	19845331	6	19839045,19839434,19841363,19843217,19843370,19845179,	19839181,19839539,19841452,19843290,19843501,19845378,	0	ENSDARG00000019986.11	incmpl	cmpl	1,1,2,1,2,0,
ENSDART00000146825.2	chr1	-	19843233	19845380	19845380	19845380	3	19843233,19843370,19845142,	19843290,19843501,19845380,	0	ENSDARG00000019986.11	none	none	-1,-1,-1,
ENSDART00000111454.5	chr1	+	19849167	19886389	19855489	19886132	33	19849167,19855444,19855647,19856990,19858002,19861918,19863765,19863922,19866087,19866288,19866476,19866644,19868051,19868194,19868741,19869696,19869923,19870106,19871992,19872268,19873247,19874479,19874647,19879863,19880003,19880196,19881321,19882518,19882738,19883019,19883241,19885762,19885981,	19849208,19855527,19855742,19857019,19858097,19862030,19863846,19864045,19866211,19866392,19866539,19866721,19868118,19868338,19868809,19869775,19870004,19870184,19872174,19872374,19873337,19874560,19874776,19879915,19880067,19880266,19881393,19882642,19882932,19883147,19883329,19885857,19886389,	0	ENSDARG00000080019.7	cmpl	cmpl	-1,0,2,1,0,2,0,0,0,1,0,0,2,0,0,2,0,0,0,2,0,0,0,0,1,2,0,0,1,0,2,0,2,
ENSDART00000186107.1	chr1	+	19855489	19886132	19855489	19886132	31	19855489,19855647,19857979,19861918,19863765,19863922,19866087,19866288,19866476,19866644,19868118,19868181,19868741,19869696,19869923,19870106,19871992,19872268,19873247,19874479,19874647,19879863,19880003,19880196,19881321,19882518,19882738,19883019,19883241,19885762,19885981,	19855527,19855742,19858097,19862030,19863846,19864045,19866211,19866392,19866539,19866721,19868157,19868338,19868809,19869775,19870004,19870184,19872174,19872374,19873337,19874560,19874776,19879915,19880067,19880266,19881393,19882642,19882932,19883147,19883329,19885857,19886132,	0	ENSDARG00000080019.7	cmpl	cmpl	0,2,1,2,0,0,0,1,0,0,2,2,0,2,0,0,0,2,0,0,0,0,1,2,0,0,1,0,2,0,2,
ENSDART00000158344.2	chr1	+	19930519	19989584	19936175	19989062	17	19930519,19932457,19935110,19936173,19950353,19950650,19953461,19955628,19955803,19966326,19971292,19978030,19978375,19980914,19984428,19984659,19988891,	19930557,19932583,19935156,19937133,19950571,19950842,19953515,19955714,19955864,19966473,19971414,19978145,19978463,19980998,19984544,19984839,19989584,	0	ENSDARG00000099995.2	cmpl	cmpl	-1,-1,-1,0,1,0,0,0,2,0,0,2,0,1,1,0,0,
ENSDART00000161573.2	chr1	+	19933064	19989062	19933064	19989062	18	19933064,19936173,19936580,19936759,19936921,19950353,19950519,19955561,19955602,19955803,19966326,19971286,19978030,19978375,19980914,19984428,19984662,19988891,	19933092,19936547,19936615,19936816,19937133,19950495,19950546,19955584,19955714,19955864,19966473,19971414,19978145,19978463,19980998,19984544,19984839,19989062,	0	ENSDARG00000099995.2	cmpl	cmpl	0,1,0,2,2,1,2,2,1,2,0,0,2,0,1,1,0,0,
ENSDART00000164661.2	chr1	+	19943802	19950795	19943866	19950795	3	19943802,19950353,19950650,	19943918,19950571,19950795,	0	ENSDARG00000099995.2	cmpl	incmpl	0,1,0,
ENSDART00000170396.2	chr1	+	19975590	19980987	19980987	19980987	4	19975590,19978030,19978375,19980914,	19975841,19978145,19978463,19980987,	0	ENSDARG00000099995.2	none	none	-1,-1,-1,-1,
ENSDART00000102993.4	chr1	-	20063501	20068155	20063737	20068045	11	20063501,20064764,20065107,20065413,20066013,20066444,20066613,20067284,20067467,20067752,20067979,	20064042,20064975,20065224,20065506,20066155,20066535,20066701,20067362,20067555,20067841,20068155,	0	ENSDARG00000070278.4	cmpl	cmpl	1,0,0,0,2,1,0,0,2,0,0,
ENSDART00000088653.4	chr1	+	20069534	20138647	20069534	20138647	13	20069534,20072364,20084389,20084653,20092558,20094211,20095084,20106466,20112420,20117332,20117556,20129387,20138339,	20069850,20072503,20084568,20084804,20092737,20094353,20095281,20106608,20112623,20117405,20117679,20129686,20138647,	0	ENSDARG00000061830.6	cmpl	cmpl	0,1,2,1,2,1,2,1,2,1,2,2,1,
ENSDART00000140263.2	chr1	+	20084388	20141844	20084388	20138647	11	20084388,20084653,20092558,20094211,20095084,20106466,20112420,20117326,20117556,20129387,20138339,	20084568,20084804,20092737,20094353,20095281,20106608,20112623,20117405,20117679,20129686,20141844,	0	ENSDARG00000061830.6	incmpl	cmpl	1,1,2,1,2,1,2,1,2,2,1,
ENSDART00000146084.3	chr1	-	20147221	20273227	20147455	20270680	14	20147221,20150938,20160579,20160835,20166464,20170255,20170978,20173926,20194049,20212190,20221440,20224307,20269696,20272869,	20147575,20151041,20160689,20161006,20166639,20170379,20171075,20174109,20194178,20212376,20221595,20224395,20270944,20273227,	0	ENSDARG00000041776.9	cmpl	cmpl	0,2,0,0,2,1,0,0,0,0,1,0,0,-1,
ENSDART00000185931.1	chr1	-	20160808	20271138	20160808	20270680	10	20160808,20166464,20170255,20170978,20173926,20194049,20212190,20221440,20224307,20269696,	20161006,20166639,20170379,20171075,20174109,20194178,20212376,20221595,20224395,20271138,	0	ENSDARG00000041776.9	cmpl	cmpl	0,2,1,0,0,0,0,1,0,0,
ENSDART00000147025.2	chr1	-	20481108	20553129	20553129	20553129	3	20481108,20481997,20552671,	20481231,20482119,20553129,	0	ENSDARG00000095632.2	none	none	-1,-1,-1,
ENSDART00000134618.2	chr1	-	20531161	20552819	20552819	20552819	2	20531161,20552671,	20531572,20552819,	0	ENSDARG00000095632.2	none	none	-1,-1,
ENSDART00000124770.3	chr1	-	20556066	20593778	20559583	20581907	6	20556066,20564672,20569542,20576354,20581082,20593625,	20559944,20564892,20569619,20576497,20581909,20593778,	0	ENSDARG00000037455.8	cmpl	cmpl	2,1,2,0,0,-1,
ENSDART00000132440.2	chr1	+	20593652	20607152	20593772	20607077	2	20593652,20606975,	20593934,20607152,	0	ENSDARG00000093816.2	cmpl	cmpl	0,0,
ENSDART00000145418.4	chr1	+	20635189	20695115	20635391	20695115	9	20635189,20635391,20661805,20661937,20673758,20678629,20678988,20694061,20694893,	20635298,20635508,20661845,20661991,20673867,20678735,20679088,20694175,20695115,	0	ENSDARG00000070266.8	cmpl	incmpl	-1,0,0,1,1,2,0,1,1,
ENSDART00000148518.3	chr1	+	20635213	20705079	20635391	20704997	11	20635213,20635391,20661805,20673758,20678629,20678988,20694061,20694893,20697980,20700417,20704851,	20635298,20635508,20661845,20673867,20678735,20679088,20694175,20695115,20698043,20700555,20705079,	0	ENSDARG00000070266.8	cmpl	cmpl	-1,0,0,1,2,0,1,1,1,1,1,
ENSDART00000139461.3	chr1	+	20635271	20700456	20635385	20700456	10	20635271,20660211,20661805,20673758,20678629,20678988,20694061,20694893,20697980,20700417,	20635508,20660220,20661845,20673867,20678735,20679088,20694175,20695115,20698043,20700456,	0	ENSDARG00000070266.8	cmpl	incmpl	0,0,0,1,2,0,1,1,1,1,
ENSDART00000102969.5	chr1	+	20635386	20706296	20635391	20704997	10	20635386,20661805,20673758,20678629,20678988,20694061,20694893,20697980,20700417,20704851,	20635508,20661845,20673867,20678735,20679088,20694175,20695115,20698043,20700555,20706296,	0	ENSDARG00000070266.8	cmpl	cmpl	0,0,1,2,0,1,1,1,1,1,
ENSDART00000166479.2	chr1	+	20635391	20704997	20635391	20704997	11	20635391,20660211,20661805,20673758,20678629,20678988,20694061,20694893,20697980,20700417,20704851,	20635508,20660220,20661845,20673867,20678735,20679088,20694175,20695115,20698043,20700555,20704997,	0	ENSDARG00000070266.8	cmpl	cmpl	0,0,0,1,2,0,1,1,1,1,1,
ENSDART00000054472.4	chr1	-	20733101	20826023	20734196	20824358	22	20733101,20736030,20738905,20741865,20752503,20759298,20759617,20763562,20763779,20764513,20766855,20767090,20767369,20770682,20770902,20773471,20788496,20788694,20792783,20799974,20824180,20825811,	20734331,20736281,20739119,20741993,20752629,20759479,20759778,20763688,20763975,20764659,20766972,20767193,20767485,20770807,20771008,20773650,20788614,20788865,20792864,20800085,20824615,20826023,	0	ENSDARG00000037429.5	cmpl	cmpl	0,1,0,1,1,0,1,1,0,1,1,0,1,2,1,2,1,1,1,1,0,-1,
ENSDART00000182810.1	chr1	-	20733343	20824411	20734196	20824358	21	20733343,20736030,20738905,20741865,20752503,20759298,20759617,20763562,20763779,20764513,20766855,20767090,20767369,20770682,20770902,20773471,20788496,20788694,20792783,20799974,20824180,	20734331,20736281,20739119,20741993,20752629,20759479,20759778,20763688,20763975,20764659,20766972,20767193,20767485,20770807,20771008,20773650,20788614,20788865,20792864,20800085,20824411,	0	ENSDARG00000037429.5	cmpl	cmpl	0,1,0,1,1,0,1,1,0,1,1,0,1,2,1,2,1,1,1,1,0,
ENSDART00000142570.2	chr1	-	20839481	20878076	20878076	20878076	2	20839481,20878051,	20840257,20878076,	0	ENSDARG00000055874.6	none	none	-1,-1,
ENSDART00000078271.6	chr1	-	20866857	20911297	20870926	20911134	9	20866857,20871104,20873968,20874210,20878051,20878629,20878879,20886899,20910893,	20871025,20871223,20874068,20874350,20878234,20878747,20879047,20887096,20911297,	0	ENSDARG00000055874.6	cmpl	cmpl	0,1,0,1,1,0,0,1,0,
ENSDART00000078277.5	chr1	-	20916550	20928772	20917163	20926042	6	20916550,20922523,20923498,20925529,20925787,20928697,	20917353,20922678,20923625,20925678,20926076,20928772,	0	ENSDARG00000055876.7	cmpl	cmpl	2,0,2,0,0,-1,
ENSDART00000147651.2	chr1	-	20929436	20930443	20930443	20930443	2	20929436,20930281,	20929678,20930443,	0	ENSDARG00000092321.2	none	none	-1,-1,
ENSDART00000088545.6	chr1	-	20932051	20970266	20932573	20969949	15	20932051,20934238,20941478,20941690,20943545,20944255,20946793,20950888,20951150,20955974,20956216,20959009,20962112,20965983,20969932,	20932602,20934382,20941619,20941819,20943647,20944453,20946911,20951038,20951267,20956084,20956379,20959131,20962219,20966109,20970266,	0	ENSDARG00000061786.8	cmpl	cmpl	1,1,1,1,1,1,0,0,0,1,0,1,2,2,0,
ENSDART00000136556.2	chr1	+	20936710	20938512	20936778	20938057	2	20936710,20938045,	20936931,20938512,	0	ENSDARG00000094202.2	cmpl	cmpl	0,0,
ENSDART00000192082.1	chr1	-	20980974	20983128	20983128	20983128	2	20980974,20982987,	20981234,20983128,	0	ENSDARG00000109806.1	none	none	-1,-1,
ENSDART00000184866.1	chr1	-	20981072	20986124	20986124	20986124	4	20981072,20981303,20982987,20985552,	20981234,20981377,20983128,20986124,	0	ENSDARG00000109806.1	none	none	-1,-1,-1,-1,
ENSDART00000181354.1	chr1	-	20981347	20983500	20983500	20983500	2	20981347,20982987,	20981377,20983500,	0	ENSDARG00000109806.1	none	none	-1,-1,
ENSDART00000184750.1	chr1	-	20990876	20993030	20993030	20993030	2	20990876,20992889,	20991136,20993030,	0	ENSDARG00000112850.1	none	none	-1,-1,
ENSDART00000191858.1	chr1	-	20990974	20996026	20996026	20996026	4	20990974,20991205,20992889,20995454,	20991136,20991279,20993030,20996026,	0	ENSDARG00000112850.1	none	none	-1,-1,-1,-1,
ENSDART00000190049.1	chr1	-	20991249	20993402	20993402	20993402	2	20991249,20992889,	20991279,20993402,	0	ENSDARG00000112850.1	none	none	-1,-1,
ENSDART00000185299.1	chr1	-	21000783	21002937	21002937	21002937	2	21000783,21002796,	21001043,21002937,	0	ENSDARG00000110242.1	none	none	-1,-1,
ENSDART00000185122.1	chr1	-	21000881	21005933	21005933	21005933	4	21000881,21001112,21002796,21005361,	21001043,21001186,21002937,21005933,	0	ENSDARG00000110242.1	none	none	-1,-1,-1,-1,
ENSDART00000187225.1	chr1	-	21001156	21003309	21003309	21003309	2	21001156,21002796,	21001186,21003309,	0	ENSDARG00000110242.1	none	none	-1,-1,
ENSDART00000136206.3	chr1	-	21010688	21012842	21012842	21012842	2	21010688,21012701,	21010948,21012842,	0	ENSDARG00000115895.1	none	none	-1,-1,
ENSDART00000145941.2	chr1	-	21010786	21015930	21015930	21015930	4	21010786,21011017,21012701,21015358,	21010948,21011091,21012842,21015930,	0	ENSDARG00000115895.1	none	none	-1,-1,-1,-1,
ENSDART00000133226.2	chr1	-	21011061	21013214	21013214	21013214	2	21011061,21012701,	21011091,21013214,	0	ENSDARG00000115895.1	none	none	-1,-1,
ENSDART00000188893.1	chr1	-	21135011	21163532	21139456	21163481	21	21135011,21141634,21144608,21146095,21146679,21148551,21151556,21151776,21153558,21154024,21157573,21158705,21159028,21159242,21159574,21159772,21160457,21160818,21161086,21161341,21163409,	21139482,21142164,21144768,21146197,21146805,21148769,21151680,21151988,21153942,21154265,21157734,21158949,21159137,21159446,21159682,21159937,21160610,21160977,21161223,21161519,21163532,	0	ENSDARG00000061459.7	cmpl	cmpl	1,2,1,1,1,2,1,2,2,1,2,1,0,0,0,0,0,0,1,0,0,
ENSDART00000087670.6	chr1	-	21135011	21163532	21139456	21163481	22	21135011,21141634,21144608,21146095,21146679,21148551,21150189,21151556,21151776,21153558,21154024,21157573,21158705,21159028,21159242,21159574,21159772,21160457,21160818,21161086,21161341,21163409,	21139482,21142164,21144768,21146197,21146805,21148769,21150213,21151680,21151988,21153942,21154265,21157734,21158949,21159137,21159446,21159682,21159937,21160610,21160977,21161223,21161519,21163532,	0	ENSDARG00000061459.7	cmpl	cmpl	1,2,1,1,1,2,2,1,2,2,1,2,1,0,0,0,0,0,0,1,0,0,
ENSDART00000141077.3	chr1	-	21138819	21204114	21139456	21204114	28	21138819,21141634,21144608,21146095,21146679,21148572,21150189,21151556,21151776,21153558,21154024,21157573,21158705,21159028,21159242,21159574,21159772,21160457,21160818,21161086,21161341,21163409,21171263,21171514,21171681,21178193,21178340,21204045,	21139482,21142164,21144768,21146197,21146805,21148769,21150213,21151680,21151988,21153942,21154265,21157734,21158949,21159137,21159446,21159682,21159937,21160610,21160977,21161223,21161519,21163532,21171431,21171590,21171765,21178250,21178411,21204114,	0	ENSDARG00000061459.7	cmpl	cmpl	1,2,1,1,1,2,2,1,2,2,1,2,1,0,0,0,0,0,0,1,0,0,0,2,2,2,0,0,
ENSDART00000146630.2	chr1	-	21138819	21165771	21139456	21165630	23	21138819,21141634,21144608,21146095,21146679,21148572,21150189,21151556,21151776,21153558,21154024,21157573,21158705,21159028,21159242,21159574,21159772,21160457,21160818,21161086,21161341,21163409,21165546,	21139482,21142164,21144768,21146197,21146805,21148769,21150213,21151680,21151988,21153942,21154265,21157734,21158949,21159137,21159446,21159682,21159937,21160610,21160977,21161223,21161519,21163532,21165771,	0	ENSDARG00000061459.7	cmpl	cmpl	1,2,1,1,1,2,2,1,2,2,1,2,1,0,0,0,0,0,0,1,0,0,0,
ENSDART00000146183.2	chr1	-	21160649	21161411	21161411	21161411	3	21160649,21161086,21161341,	21160977,21161223,21161411,	0	ENSDARG00000061459.7	none	none	-1,-1,-1,
ENSDART00000142109.2	chr1	-	21242835	21297748	21242835	21287382	3	21242835,21286656,21297613,	21243252,21287489,21297748,	0	ENSDARG00000037411.6	cmpl	cmpl	0,0,-1,
ENSDART00000193900.1	chr1	-	21242835	21287724	21242835	21287382	2	21242835,21286656,	21243252,21287724,	0	ENSDARG00000037411.6	cmpl	cmpl	0,0,
ENSDART00000120308.2	chr1	+	21254352	21254482	21254482	21254482	1	21254352,	21254482,	0	ENSDARG00000084908.2	none	none	-1,
ENSDART00000054442.6	chr1	+	21309385	21312596	21309408	21312250	4	21309385,21309926,21310950,21312052,	21309570,21309993,21311063,21312596,	0	ENSDARG00000037410.6	cmpl	cmpl	0,0,1,0,
ENSDART00000145661.2	chr1	+	21309403	21312088	21309408	21312068	3	21309403,21310950,21312052,	21309570,21311063,21312088,	0	ENSDARG00000037410.6	cmpl	cmpl	0,0,2,
ENSDART00000054440.7	chr1	-	21313164	21321482	21314013	21321350	12	21313164,21315643,21316227,21316420,21316625,21317685,21318124,21318748,21319284,21319511,21321033,21321271,	21314097,21315697,21316325,21316540,21316744,21317762,21318203,21318829,21319384,21319634,21321177,21321482,	0	ENSDARG00000037409.7	cmpl	cmpl	0,0,1,1,2,0,2,2,1,1,1,0,
ENSDART00000145053.2	chr1	-	21320822	21321435	21321435	21321435	2	21320822,21321271,	21321177,21321435,	0	ENSDARG00000037409.7	none	none	-1,-1,
ENSDART00000102782.5	chr1	-	21333067	21409877	21336123	21409689	16	21333067,21336119,21337856,21341575,21344388,21345040,21345846,21346132,21352032,21352223,21352525,21355754,21355959,21367982,21409266,21409616,	21333581,21336369,21337971,21341823,21344587,21345408,21346053,21346240,21352137,21352391,21352684,21355808,21356156,21368222,21409407,21409877,	0	ENSDARG00000070173.8	cmpl	cmpl	-1,0,2,0,2,0,0,0,0,0,0,0,1,1,1,0,
ENSDART00000077805.7	chr1	-	21333125	21344478	21333416	21344478	5	21333125,21336234,21337323,21341575,21344388,	21333581,21336369,21337438,21341823,21344478,	0	ENSDARG00000070173.8	cmpl	incmpl	0,0,2,0,0,
ENSDART00000102790.6	chr1	-	21423009	21483832	21423494	21483393	11	21423009,21439326,21447770,21449721,21463994,21470159,21473095,21473605,21477829,21478432,21483388,	21423791,21439476,21447919,21449874,21464135,21470242,21473322,21473673,21477936,21478549,21483832,	0	ENSDARG00000052782.8	cmpl	cmpl	0,0,1,1,1,2,0,1,2,2,0,
ENSDART00000131257.3	chr1	-	21495849	21538673	21500199	21538624	37	21495849,21500164,21500415,21500749,21501347,21502131,21505585,21506158,21507483,21508940,21509228,21513744,21514015,21515844,21516037,21516236,21516723,21518467,21518696,21521902,21522217,21525794,21526088,21526833,21527056,21527262,21529355,21529599,21532537,21534926,21536235,21536431,21537057,21537293,21537536,21538144,21538618,	21496079,21500314,21500492,21500873,21501498,21502213,21505710,21506255,21507561,21509009,21509338,21513869,21514162,21515928,21516120,21516383,21516781,21518577,21518807,21522062,21522425,21525942,21526238,21526956,21527163,21527377,21529528,21529670,21532711,21535039,21536316,21536547,21537173,21537419,21537602,21538236,21538673,	0	ENSDARG00000037406.7	cmpl	cmpl	-1,2,0,2,1,0,1,0,0,0,1,2,2,2,0,0,2,0,0,2,1,0,0,0,1,0,1,2,2,0,0,1,2,2,2,0,0,
ENSDART00000182798.1	chr1	-	21500199	21538329	21500199	21538329	35	21500199,21500415,21500749,21501347,21502131,21505585,21506158,21507483,21508940,21509228,21513744,21514015,21515844,21516037,21516236,21516723,21518467,21518696,21521902,21522217,21525794,21526088,21526833,21527056,21527262,21529355,21529599,21532537,21534926,21536235,21536431,21537057,21537293,21537536,21538144,	21500314,21500492,21500873,21501498,21502213,21505710,21506255,21507561,21509009,21509338,21513869,21514162,21515928,21516120,21516377,21516781,21518577,21518807,21522062,21522425,21525942,21526238,21526956,21527163,21527377,21529528,21529670,21532711,21535039,21536316,21536547,21537173,21537419,21537602,21538329,	0	ENSDARG00000037406.7	cmpl	cmpl	2,0,2,1,0,1,0,0,0,1,2,2,2,0,0,2,0,0,2,1,0,0,0,1,0,1,2,2,0,0,1,2,2,2,0,
ENSDART00000135905.2	chr1	-	21516037	21529641	21516037	21529641	7	21516037,21516236,21516723,21518467,21518696,21529355,21529599,	21516120,21516383,21516781,21518577,21518807,21529528,21529641,	0	ENSDARG00000037406.7	incmpl	incmpl	0,0,2,0,0,1,1,
ENSDART00000193518.1	chr1	-	21516480	21538329	21516480	21538329	22	21516480,21516557,21516723,21518467,21518696,21521902,21522217,21525794,21526088,21526833,21527056,21527262,21529355,21529599,21532537,21534926,21536235,21536431,21537057,21537293,21537536,21538144,	21516509,21516591,21516781,21518577,21518807,21522062,21522425,21525942,21526238,21526956,21527163,21527377,21529528,21529670,21532711,21535039,21536316,21536547,21537173,21537419,21537602,21538329,	0	ENSDARG00000037406.7	cmpl	cmpl	1,0,2,0,0,2,1,0,0,0,1,0,1,2,2,0,0,1,2,2,2,0,
ENSDART00000147314.2	chr1	-	21526671	21527371	21527371	21527371	3	21526671,21527056,21527262,	21526956,21527163,21527371,	0	ENSDARG00000037406.7	none	none	-1,-1,-1,
ENSDART00000183376.1	chr1	-	21537265	21538329	21537265	21538329	4	21537265,21537289,21537536,21538144,	21537274,21537419,21537602,21538329,	0	ENSDARG00000037406.7	cmpl	cmpl	0,2,2,0,
ENSDART00000183873.1	chr1	-	21537265	21538329	21537265	21538329	3	21537265,21537289,21538144,	21537274,21537419,21538329,	0	ENSDARG00000037406.7	cmpl	cmpl	0,2,0,
ENSDART00000049572.4	chr1	-	21540452	21563040	21540613	21562999	35	21540452,21540818,21541178,21542061,21544942,21545134,21545361,21546315,21546511,21547898,21548112,21548349,21549584,21549927,21550140,21551508,21552432,21553134,21553777,21554055,21556641,21556890,21557047,21557254,21557910,21558287,21558916,21559111,21559331,21559679,21560129,21560413,21561984,21562230,21562947,	21540686,21540873,21541241,21542103,21545010,21545268,21545532,21546426,21546708,21548032,21548250,21548429,21549823,21550029,21550249,21551616,21552542,21553232,21553969,21554276,21556776,21556964,21557167,21557290,21558163,21558413,21558989,21559245,21559419,21559741,21560297,21560589,21562147,21562385,21563040,	0	ENSDARG00000034773.4	cmpl	cmpl	2,1,1,1,2,0,0,0,1,2,2,0,1,1,0,0,1,2,2,0,0,1,1,1,0,0,2,0,2,0,0,1,0,1,0,
ENSDART00000134857.2	chr1	-	21556543	21558413	21558413	21558413	6	21556543,21556890,21557047,21557254,21557910,21558287,	21556776,21556964,21557167,21557290,21558163,21558413,	0	ENSDARG00000034773.4	none	none	-1,-1,-1,-1,-1,-1,
ENSDART00000147076.3	chr1	+	21563310	21566376	21564605	21566376	6	21563310,21564505,21564886,21565151,21566082,21566324,	21563444,21564788,21564981,21565290,21566230,21566376,	0	ENSDARG00000033273.7	cmpl	incmpl	-1,0,0,2,0,1,
ENSDART00000006147.9	chr1	+	21563333	21573013	21564605	21572797	14	21563333,21564505,21564886,21565151,21566082,21566324,21566556,21568260,21568549,21569054,21570014,21570214,21572428,21572563,	21563405,21564788,21564981,21565290,21566230,21566376,21566693,21568423,21568644,21569141,21570123,21570297,21572475,21573013,	0	ENSDARG00000033273.7	cmpl	cmpl	-1,0,0,2,0,1,2,1,2,1,1,2,1,0,
ENSDART00000146638.2	chr1	+	21564505	21566601	21564605	21566360	5	21564505,21564886,21565151,21566324,21566556,	21564788,21564981,21565290,21566376,21566601,	0	ENSDARG00000033273.7	cmpl	cmpl	0,0,2,0,-1,
ENSDART00000148327.2	chr1	-	21576673	21599219	21576876	21599219	12	21576673,21579165,21579473,21581664,21581920,21585404,21587545,21590245,21591701,21592543,21593667,21598990,	21577016,21579310,21579653,21581841,21582094,21585618,21587675,21590413,21591807,21592719,21593851,21599219,	0	ENSDARG00000055439.7	cmpl	incmpl	1,0,0,0,0,2,1,1,0,1,0,2,
ENSDART00000129066.3	chr1	-	21610470	21714025	21611958	21714004	9	21610470,21612617,21614741,21639192,21646581,21648580,21648888,21709396,21713942,	21612542,21612735,21614837,21639228,21646752,21648718,21648947,21710016,21714025,	0	ENSDARG00000055443.8	cmpl	cmpl	1,0,0,0,0,0,1,2,0,
ENSDART00000181218.1	chr1	-	21680363	21680478	21680478	21680478	1	21680363,	21680478,	0	ENSDARG00000112783.1	none	none	-1,
ENSDART00000137138.2	chr1	-	21721650	21723329	21721916	21723221	2	21721650,21723121,	21722008,21723329,	0	ENSDARG00000095593.2	cmpl	cmpl	1,0,
ENSDART00000132602.3	chr1	+	21725820	21815554	21726304	21815554	11	21725820,21737317,21744977,21748778,21753233,21769387,21790344,21798672,21807143,21810843,21815471,	21726350,21737483,21745175,21748843,21753359,21769488,21790474,21798774,21807230,21810930,21815554,	0	ENSDARG00000037383.8	cmpl	cmpl	0,1,2,2,1,1,0,1,1,1,1,
ENSDART00000054395.6	chr1	+	21731381	21815554	21731381	21815554	11	21731381,21737317,21744977,21748778,21753233,21769387,21790344,21798672,21807143,21810843,21815471,	21731424,21737483,21745175,21748843,21753359,21769488,21790474,21798774,21807230,21810930,21815554,	0	ENSDARG00000037383.8	cmpl	cmpl	0,1,2,2,1,1,0,1,1,1,1,
ENSDART00000047728.7	chr1	-	21861386	21881818	21861704	21880701	18	21861386,21863615,21865236,21867452,21869432,21872068,21873421,21874568,21875544,21875726,21875956,21878186,21878480,21879944,21880176,21880452,21880637,21881613,	21861891,21863719,21865396,21867558,21869697,21872221,21873550,21874655,21875643,21875795,21876055,21878279,21878549,21880088,21880293,21880538,21880718,21881818,	0	ENSDARG00000030759.8	cmpl	cmpl	2,0,2,1,0,0,0,0,0,0,0,0,0,0,0,1,0,-1,
ENSDART00000169381.2	chr1	-	21880254	21881768	21881768	21881768	3	21880254,21880637,21881613,	21880538,21880718,21881768,	0	ENSDARG00000030759.8	none	none	-1,-1,-1,
ENSDART00000140553.2	chr1	-	21893288	21901589	21893288	21901589	7	21893288,21893685,21894203,21895376,21896924,21899955,21901484,	21893381,21893809,21894340,21895496,21897050,21900051,21901589,	0	ENSDARG00000079074.5	incmpl	incmpl	0,2,0,0,0,0,0,
ENSDART00000139937.2	chr1	-	21904954	21909608	21904954	21909608	3	21904954,21909239,21909507,	21905057,21909403,21909608,	0	ENSDARG00000079074.5	incmpl	cmpl	1,2,0,
ENSDART00000087729.5	chr1	+	21937200	21971913	21937983	21971435	22	21937200,21937948,21940875,21941282,21944575,21944893,21945059,21945278,21947157,21948195,21949845,21953229,21954837,21955105,21957107,21958973,21959393,21961304,21964482,21968726,21968941,21971273,	21937282,21938127,21941051,21941397,21944769,21944943,21945163,21945416,21947348,21948368,21951539,21953341,21955019,21955304,21957184,21959029,21959502,21961493,21964653,21968846,21969034,21971913,	0	ENSDARG00000061504.6	cmpl	cmpl	-1,0,0,2,0,2,1,0,0,2,1,0,1,0,1,0,2,0,0,0,0,0,
ENSDART00000132090.2	chr1	+	21951257	21953463	21953463	21953463	2	21951257,21953229,	21951539,21953463,	0	ENSDARG00000061504.6	none	none	-1,-1,
ENSDART00000141317.3	chr1	+	22002648	22222474	22003172	22222474	75	22002648,22003106,22006321,22006571,22007467,22008019,22009536,22010096,22010787,22013136,22013663,22013884,22016485,22016692,22017990,22018254,22019569,22019819,22022694,22027331,22028631,22028765,22028966,22031224,22031595,22031792,22035040,22041870,22042930,22046821,22047425,22049828,22050065,22052521,22058749,22063776,22066679,22066997,22068957,22073901,22076902,22077131,22079277,22083397,220…	22002818,22003448,22006489,22006846,22007735,22008154,22009651,22010211,22010956,22013244,22013774,22013974,22016606,22016844,22018143,22018506,22019698,22019933,22022838,22027487,22028682,22028858,22029086,22031405,22031692,22032006,22035205,22041981,22043056,22047013,22047587,22049966,22050233,22052670,22058857,22064332,22066802,22067180,22069101,22074123,22077050,22077289,22079409,22083569,220…	0	ENSDARG00000000606.12	cmpl	incmpl	-1,0,0,0,2,0,0,1,2,0,0,0,0,1,0,0,0,0,0,0,0,0,0,0,1,2,0,0,0,0,0,0,0,0,2,2,0,0,0,0,0,1,0,0,1,1,0,2,0,0,0,0,0,2,0,1,0,0,0,0,2,0,0,0,1,0,2,1,0,0,1,1,0,1,0,
ENSDART00000054388.7	chr1	+	22003172	22235421	22003172	22235421	78	22003172,22006321,22006571,22007467,22008019,22009536,22010096,22010787,22013136,22013663,22013884,22016485,22016692,22017990,22018254,22019569,22019819,22022694,22027331,22028631,22028765,22028966,22031224,22031595,22031792,22035040,22041870,22042930,22046821,22047425,22049828,22050065,22052521,22058749,22063776,22066679,22066997,22068957,22073901,22076902,22077131,22079277,22083397,22084643,220…	22003448,22006489,22006846,22007735,22008154,22009651,22010211,22010956,22013244,22013774,22013974,22016606,22016844,22018143,22018506,22019698,22019933,22022838,22027487,22028682,22028858,22029086,22031405,22031692,22032006,22035205,22041981,22043056,22046977,22047587,22049966,22050233,22052670,22058857,22064332,22066802,22067180,22069101,22074123,22077050,22077289,22079409,22083569,22084790,220…	0	ENSDARG00000000606.12	cmpl	cmpl	0,0,0,2,0,0,1,2,0,0,0,0,1,0,0,0,0,0,0,0,0,0,0,1,2,0,0,0,0,0,0,0,0,2,2,0,0,0,0,0,1,0,0,1,1,0,2,0,0,0,0,0,2,0,1,0,0,0,0,2,0,0,0,1,0,2,1,0,0,1,1,0,1,0,0,1,0,1,
ENSDART00000137429.2	chr1	+	22174250	22179555	22174800	22179555	4	22174250,22174695,22175234,22179487,	22174302,22174821,22175399,22179555,	0	ENSDARG00000000606.12	cmpl	incmpl	-1,0,0,0,
ENSDART00000174446.2	chr1	-	22191951	22192067	22192067	22192067	1	22191951,	22192067,	0	ENSDARG00000107258.2	none	none	-1,
ENSDART00000176849.2	chr1	-	22236488	22338521	22236488	22338521	9	22236488,22242450,22242706,22245580,22253513,22260960,22283625,22304676,22338329,	22237031,22242560,22242793,22245775,22253681,22261040,22283735,22304721,22338521,	0	ENSDARG00000087224.5	cmpl	incmpl	0,1,1,1,1,2,0,0,0,
ENSDART00000127506.3	chr1	-	22283625	22370660	22283625	22370605	4	22283625,22304676,22338329,22370532,	22283735,22304721,22338469,22370660,	0	ENSDARG00000087224.5	incmpl	cmpl	0,0,1,0,
ENSDART00000074678.5	chr1	-	22388798	22412042	22389280	22411800	6	22388798,22391118,22393394,22393595,22401703,22411739,	22389412,22392022,22393504,22393640,22401855,22412042,	0	ENSDARG00000052764.5	cmpl	cmpl	0,2,0,0,1,0,
ENSDART00000147193.2	chr1	+	22427134	22428853	22427200	22428832	3	22427134,22427929,22428206,	22427492,22428097,22428853,	0	ENSDARG00000092275.2	cmpl	cmpl	0,1,1,
ENSDART00000190987.1	chr1	-	22481722	22512136	22484804	22511905	5	22481722,22490155,22491390,22498947,22511847,	22484930,22491215,22491500,22499087,22512136,	0	ENSDARG00000055559.4	cmpl	cmpl	0,2,0,1,0,
ENSDART00000031546.6	chr1	-	22484564	22512063	22484804	22511905	6	22484564,22490155,22491390,22495150,22498947,22511847,	22484930,22491215,22491500,22495195,22499087,22512063,	0	ENSDARG00000055559.4	cmpl	cmpl	0,2,0,0,1,0,
ENSDART00000181063.1	chr1	+	22521211	22521326	22521326	22521326	1	22521211,	22521326,	0	ENSDARG00000114954.1	none	none	-1,
ENSDART00000187834.1	chr1	-	22542456	22594338	22546731	22593676	7	22542456,22546962,22554829,22562513,22563203,22566994,22593612,	22546747,22547105,22555790,22562623,22563248,22567140,22594338,	0	ENSDARG00000115778.1	cmpl	cmpl	2,0,2,0,0,1,0,
ENSDART00000142524.2	chr1	-	22546958	22567140	22546958	22567140	5	22546958,22554829,22562513,22563203,22566994,	22547105,22555790,22562623,22563248,22567140,	0	ENSDARG00000115778.1	cmpl	incmpl	0,2,0,0,1,
ENSDART00000036797.9	chr1	-	22647755	22652424	22648127	22651963	9	22647755,22648391,22648556,22648719,22649023,22650172,22651341,22651808,22651930,	22648211,22648450,22648626,22648767,22649109,22650308,22651470,22651820,22652424,	0	ENSDARG00000026871.10	cmpl	cmpl	0,1,0,0,1,0,0,0,0,
ENSDART00000171830.2	chr1	-	22651578	22652026	22652026	22652026	2	22651578,22651930,	22651820,22652026,	0	ENSDARG00000026871.10	none	none	-1,-1,
ENSDART00000019698.8	chr1	+	22654874	22665098	22655237	22664290	13	22654874,22655194,22658005,22660053,22660244,22660474,22660706,22660941,22661598,22661786,22662028,22664017,22664227,	22654950,22655240,22658090,22660148,22660358,22660565,22660786,22660992,22661692,22661882,22662087,22664140,22665098,	0	ENSDARG00000016470.9	cmpl	cmpl	-1,0,0,1,0,0,1,0,0,1,1,0,0,
ENSDART00000161874.2	chr1	+	22654907	22664172	22658077	22664167	11	22654907,22658005,22660053,22660244,22660474,22660706,22660941,22661598,22661786,22662028,22664017,	22654950,22658090,22660148,22660358,22660565,22660786,22660992,22661692,22661882,22662087,22664172,	0	ENSDARG00000016470.9	cmpl	cmpl	-1,0,1,0,0,1,0,0,1,1,0,
ENSDART00000160680.2	chr1	-	22663722	22674613	22674613	22674613	2	22663722,22674501,	22664383,22674613,	0	ENSDARG00000103166.2	none	none	-1,-1,
ENSDART00000128918.3	chr1	-	22677428	22678471	22677611	22678232	2	22677428,22678420,	22678243,22678471,	0	ENSDARG00000091660.3	cmpl	cmpl	0,-1,
ENSDART00000168171.2	chr1	-	22685960	22687913	22686978	22687818	2	22685960,22686962,	22686343,22687913,	0	ENSDARG00000038056.7	cmpl	cmpl	-1,0,
ENSDART00000076766.6	chr1	-	22685964	22691182	22686978	22687818	4	22685964,22686212,22686962,22691139,	22686124,22686343,22687913,22691182,	0	ENSDARG00000038056.7	cmpl	cmpl	-1,-1,0,-1,
ENSDART00000017413.10	chr1	+	22691255	22703383	22691343	22703284	12	22691255,22691577,22693343,22693565,22693700,22694723,22694926,22696514,22696925,22700375,22700596,22703184,	22691429,22691686,22693460,22693619,22693853,22694812,22695018,22696687,22697051,22700497,22700722,22703383,	0	ENSDARG00000002406.10	cmpl	cmpl	0,2,0,0,0,0,2,1,0,0,2,2,
ENSDART00000134719.3	chr1	-	22712930	22757145	22714111	22756904	26	22712930,22714096,22718769,22720790,22720987,22721455,22721656,22723730,22726177,22726343,22726576,22727078,22728962,22729178,22730301,22731434,22731713,22731866,22734185,22735857,22736288,22736966,22743426,22745517,22746606,22756648,	22713997,22714133,22718885,22720880,22721056,22721536,22721710,22723823,22726249,22726490,22726661,22727182,22729086,22729331,22730461,22731443,22731777,22731941,22734403,22735947,22736352,22737087,22743632,22745544,22746668,22757145,	0	ENSDARG00000034007.10	cmpl	cmpl	-1,2,0,0,0,0,0,0,0,0,2,0,2,2,1,1,0,0,1,1,0,2,0,0,1,0,
ENSDART00000158915.2	chr1	-	22714111	22756898	22714111	22756898	25	22714111,22718769,22720790,22720987,22721455,22721656,22723730,22726177,22726343,22726576,22727078,22728962,22729178,22730301,22730732,22731713,22731866,22734185,22735857,22736288,22736966,22743426,22745517,22746606,22756648,	22714133,22718885,22720880,22721056,22721536,22721710,22723823,22726249,22726490,22726661,22727182,22729086,22729331,22730461,22730741,22731777,22731941,22734403,22735947,22736352,22737087,22743632,22745544,22746668,22756898,	0	ENSDARG00000034007.10	cmpl	cmpl	2,0,0,0,0,0,0,0,0,2,0,2,2,1,1,0,0,1,1,0,2,0,0,1,0,
ENSDART00000140920.2	chr1	-	22720987	22726233	22720987	22726233	6	22720987,22721455,22721656,22722045,22723730,22726177,	22721056,22721536,22721710,22722063,22723823,22726233,	0	ENSDARG00000034007.10	incmpl	incmpl	0,0,0,0,0,1,
ENSDART00000134831.2	chr1	-	22730372	22735924	22730372	22735924	7	22730372,22731434,22731713,22731866,22734185,22734746,22735857,	22730461,22731443,22731777,22731941,22734403,22734770,22735924,	0	ENSDARG00000034007.10	incmpl	incmpl	1,1,0,0,1,1,0,
ENSDART00000086867.6	chr1	-	22770254	22803147	22772547	22803117	14	22770254,22775520,22777129,22777309,22777828,22784071,22784282,22784452,22784895,22786340,22786581,22791544,22795224,22802927,	22772780,22775687,22777206,22777378,22777888,22784181,22784363,22784522,22784993,22786476,22786744,22791663,22795355,22803147,	0	ENSDARG00000061143.6	cmpl	cmpl	1,2,0,0,0,1,1,0,1,0,2,0,1,0,
ENSDART00000043556.5	chr1	-	22805397	22834824	22808684	22834685	9	22805397,22814840,22817744,22820241,22820468,22823219,22829270,22830739,22834553,	22808921,22814965,22817798,22820365,22820552,22823342,22829443,22830842,22834824,	0	ENSDARG00000034896.6	cmpl	cmpl	0,1,1,0,0,0,1,0,0,
ENSDART00000185307.1	chr1	+	22842934	22873915	22842934	22873915	7	22842934,22843623,22854995,22855847,22867815,22870981,22873907,	22842944,22843675,22855021,22855865,22867828,22871001,22873915,	0	ENSDARG00000116099.1	incmpl	incmpl	0,1,2,1,1,2,1,
ENSDART00000054386.5	chr1	-	22845224	22851481	22845469	22851421	7	22845224,22845658,22845823,22849393,22849735,22851016,22851328,	22845572,22845742,22845932,22849534,22849832,22851109,22851481,	0	ENSDARG00000037378.5	cmpl	cmpl	2,2,1,1,0,0,0,
ENSDART00000142288.2	chr1	-	22845288	22851419	22851419	22851419	7	22845288,22845658,22845823,22849393,22849735,22851016,22851328,	22845572,22845742,22845932,22849534,22849845,22851109,22851419,	0	ENSDARG00000037378.5	none	none	-1,-1,-1,-1,-1,-1,-1,
ENSDART00000193925.1	chr1	+	22851260	22876174	22856003	22872005	7	22851260,22856002,22863985,22864757,22869506,22871436,22871643,	22851886,22856166,22864077,22864865,22869689,22871530,22876174,	0	ENSDARG00000012672.9	cmpl	cmpl	-1,0,1,0,0,0,1,
ENSDART00000138235.3	chr1	+	22851744	22858900	22856003	22858413	3	22851744,22856002,22858312,	22851886,22856166,22858900,	0	ENSDARG00000012672.9	cmpl	cmpl	-1,0,1,
ENSDART00000016488.9	chr1	+	22851745	22872274	22856003	22872005	8	22851745,22856002,22863985,22864757,22869506,22871436,22871643,22871885,	22851886,22856166,22864077,22864865,22869689,22871530,22871759,22872274,	0	ENSDARG00000012672.9	cmpl	cmpl	-1,0,1,0,0,0,1,0,
ENSDART00000139412.3	chr1	-	22857752	22861348	22858357	22858570	2	22857752,22861249,	22858571,22861348,	0	ENSDARG00000093064.3	cmpl	cmpl	0,-1,
ENSDART00000144208.3	chr1	-	22943550	23157583	22945266	23110809	21	22943550,22950985,22956382,22958113,22966735,22977556,22981509,22987939,22991979,22996515,22996790,22997080,23020106,23035520,23036269,23040061,23071952,23094618,23108824,23110685,23157158,	22946180,22951111,22956479,22958242,22966904,22977648,22981576,22988160,22992189,22996692,22996996,22997203,23020290,23035706,23036367,23040358,23072759,23094728,23109038,23110833,23157583,	0	ENSDARG00000061121.7	cmpl	cmpl	1,1,0,0,2,0,2,0,0,0,1,1,0,0,1,1,1,2,1,0,-1,
ENSDART00000146871.3	chr1	-	22943550	23040358	22945266	23040358	16	22943550,22950985,22956382,22958113,22966735,22977556,22981509,22987939,22991979,22996515,22996790,22997080,23020106,23035520,23036269,23040061,	22946180,22951111,22956479,22958242,22966904,22977648,22981576,22988160,22992189,22996692,22996996,22997203,23020290,23035706,23036367,23040358,	0	ENSDARG00000061121.7	cmpl	incmpl	1,1,0,0,2,0,2,0,0,0,1,1,0,0,1,1,
ENSDART00000190858.1	chr1	-	22945266	23110833	22945266	23110809	23	22945266,22948602,22950985,22956382,22958113,22966735,22977556,22981509,22987939,22991979,22996515,22996790,22997080,23020106,23031123,23035520,23036269,23040061,23071952,23083563,23094618,23108824,23110685,	22946180,22948620,22951111,22956479,22958242,22966904,22977648,22981576,22988160,22992189,22996692,22996996,22997203,23020290,23031162,23035706,23036367,23040358,23072759,23083578,23094728,23109038,23110833,	0	ENSDARG00000061121.7	cmpl	cmpl	1,1,1,0,0,2,0,2,0,0,0,1,1,0,0,0,1,1,1,1,2,1,0,
ENSDART00000189344.1	chr1	-	22945266	23110833	22945266	23110809	21	22945266,22956382,22958113,22966735,22977556,22981509,22987939,22991979,22996515,22996790,22997080,23020106,23031123,23035520,23036269,23040061,23071952,23083563,23094618,23108824,23110685,	22946180,22956479,22958242,22966904,22977648,22981576,22988160,22992189,22996692,22996996,22997203,23020290,23031162,23035706,23036367,23040358,23072759,23083578,23094728,23109038,23110833,	0	ENSDARG00000061121.7	cmpl	cmpl	1,0,0,2,0,2,0,0,0,1,1,0,0,0,1,1,1,1,2,1,0,
ENSDART00000171848.2	chr1	-	22945266	23110740	22945266	23110740	21	22945266,22945573,22945636,22956382,22958089,22966735,22977556,22981509,22987939,22991979,22996515,22996790,22997080,23020106,23035520,23036269,23040061,23071958,23094618,23108824,23110685,	22945489,22945597,22946180,22956479,22958242,22966904,22977648,22981576,22988160,22992189,22996692,22996996,22997203,23020290,23035706,23036367,23040358,23072759,23094728,23109038,23110740,	0	ENSDARG00000061121.7	cmpl	cmpl	2,2,1,0,0,2,0,2,0,0,0,1,1,0,0,1,1,1,2,1,0,
ENSDART00000086797.6	chr1	-	22945266	23110833	22945266	23110809	22	22945266,22950985,22956382,22958113,22966735,22977556,22981509,22987939,22991979,22996515,22996790,22997080,23020106,23031123,23035520,23036269,23040061,23071952,23083563,23094618,23108824,23110685,	22946180,22951111,22956479,22958242,22966904,22977648,22981576,22988160,22992189,22996692,22996996,22997203,23020290,23031162,23035706,23036367,23040358,23072759,23083578,23094728,23109038,23110833,	0	ENSDARG00000061121.7	cmpl	cmpl	1,1,0,0,2,0,2,0,0,0,1,1,0,0,0,1,1,1,1,2,1,0,
ENSDART00000162827.2	chr1	+	23161368	23239849	23161368	23239849	41	23161368,23162717,23162933,23169023,23169352,23169599,23172265,23172507,23174922,23181984,23182417,23184443,23184713,23185240,23188475,23188824,23192661,23196930,23203168,23203963,23206165,23206852,23210933,23212194,23212348,23215406,23215745,23217249,23217743,23219477,23219637,23223951,23225927,23226260,23226512,23230596,23230733,23230871,23232818,23239365,23239684,	23161424,23162770,23163103,23169230,23169489,23169762,23172388,23172699,23175003,23182261,23182480,23184523,23184860,23185417,23188637,23189034,23192742,23197036,23203367,23204095,23206435,23207030,23211032,23212260,23212408,23215581,23215954,23217341,23217789,23219555,23219997,23224035,23226151,23226408,23226584,23230645,23230777,23230982,23233120,23239489,23239849,	0	ENSDARG00000094677.3	cmpl	cmpl	0,2,1,0,0,2,0,0,0,0,1,1,0,0,0,0,0,0,1,2,2,2,0,0,0,0,1,0,2,0,0,0,0,2,0,0,1,0,0,2,0,
ENSDART00000188428.1	chr1	+	23162123	23239849	23162763	23239849	42	23162123,23162717,23162933,23169023,23169352,23169599,23172265,23172507,23174922,23181984,23182417,23184443,23184713,23185240,23188475,23188824,23192661,23196930,23203168,23203963,23206165,23206852,23210933,23212194,23212348,23215406,23215745,23217249,23217743,23219477,23219637,23223951,23225927,23226260,23226512,23230596,23230733,23230871,23232818,23233010,23239365,23239684,	23162565,23162770,23163103,23169230,23169489,23169762,23172388,23172699,23175003,23182261,23182480,23184523,23184860,23185417,23188637,23189034,23192742,23197036,23203367,23204095,23206435,23207030,23211032,23212260,23212408,23215581,23215954,23217341,23217789,23219555,23219997,23224035,23226151,23226408,23226584,23230645,23230777,23230982,23232923,23233120,23239489,23239849,	0	ENSDARG00000094677.3	cmpl	cmpl	-1,0,1,0,0,2,0,0,0,0,1,1,0,0,0,0,0,0,1,2,2,2,0,0,0,0,1,0,2,0,0,0,0,2,0,0,1,0,0,0,2,0,
ENSDART00000147857.2	chr1	+	23230458	23240046	23230491	23239849	7	23230458,23230733,23230871,23232818,23233010,23239365,23239684,	23230645,23230777,23230982,23232923,23233120,23239489,23240046,	0	ENSDARG00000094677.3	cmpl	cmpl	0,1,0,0,0,2,0,
ENSDART00000143948.3	chr1	-	23243092	23268569	23243675	23268434	24	23243092,23248355,23248777,23249080,23249465,23250833,23251097,23251334,23253825,23254467,23254668,23254972,23257720,23258694,23258940,23259242,23261726,23262233,23262618,23265461,23265867,23267379,23267536,23268431,	23243789,23248538,23248991,23249226,23249583,23250988,23251196,23251430,23253963,23254556,23254783,23255085,23258108,23258799,23259120,23259350,23262071,23262311,23262690,23265766,23265966,23267446,23267650,23268569,	0	ENSDARG00000054799.10	cmpl	cmpl	0,0,2,0,2,0,0,0,0,1,0,1,0,0,0,0,0,0,0,1,1,0,0,0,
ENSDART00000192774.1	chr1	+	23261856	23292761	23261856	23292761	11	23261856,23262962,23265870,23269123,23269863,23270946,23273942,23285834,23288265,23292553,23292737,	23261875,23262972,23265884,23269135,23269893,23271015,23273952,23285855,23288275,23292577,23292761,	0	ENSDARG00000116939.1	incmpl	incmpl	0,1,2,1,1,1,1,2,2,0,0,
ENSDART00000146575.2	chr1	-	23265671	23268013	23265671	23267731	5	23265671,23265867,23267379,23267536,23267728,	23265766,23265966,23267446,23267650,23268013,	0	ENSDARG00000054799.10	incmpl	cmpl	1,1,0,0,0,
ENSDART00000144004.2	chr1	-	23267343	23268528	23268528	23268528	3	23267343,23267536,23268431,	23267446,23267650,23268528,	0	ENSDARG00000054799.10	none	none	-1,-1,-1,
ENSDART00000181658.1	chr1	-	23267379	23274038	23269777	23274037	6	23267379,23271286,23271477,23271701,23273791,23273991,	23269887,23271367,23271610,23271797,23273907,23274038,	0	ENSDARG00000054799.10	cmpl	cmpl	1,1,0,0,1,0,
ENSDART00000054338.7	chr1	-	23269502	23274504	23270329	23274037	8	23269502,23270318,23271286,23271477,23271701,23273791,23273991,23274453,	23269887,23270436,23271367,23271610,23271797,23273907,23274038,23274504,	0	ENSDARG00000037350.7	cmpl	cmpl	-1,1,1,0,0,1,0,-1,
ENSDART00000147800.3	chr1	-	23269726	23274393	23270329	23274037	7	23269726,23270318,23271286,23271477,23271701,23273791,23273991,	23269887,23270436,23271367,23271610,23271797,23273907,23274393,	0	ENSDARG00000037350.7	cmpl	cmpl	-1,1,1,0,0,1,0,
ENSDART00000054340.7	chr1	-	23269726	23274474	23269777	23274037	7	23269726,23271286,23271477,23271701,23273791,23273991,23274453,	23269887,23271367,23271610,23271797,23273907,23274038,23274474,	0	ENSDARG00000037350.7	cmpl	cmpl	1,1,0,0,1,0,-1,
ENSDART00000130277.3	chr1	-	23269729	23274425	23270329	23274037	8	23269729,23270318,23271286,23271477,23271701,23273791,23273991,23274281,	23269887,23270436,23271367,23271610,23271797,23273907,23274038,23274425,	0	ENSDARG00000037350.7	cmpl	cmpl	-1,1,1,0,0,1,0,-1,
ENSDART00000122877.3	chr1	-	23269858	23274040	23274040	23274040	6	23269858,23270318,23271286,23271477,23273791,23273991,	23269887,23270436,23271367,23271797,23273907,23274040,	0	ENSDARG00000037350.7	none	none	-1,-1,-1,-1,-1,-1,
ENSDART00000133195.2	chr1	-	23270887	23271791	23271791	23271791	3	23270887,23271477,23271701,	23271367,23271610,23271791,	0	ENSDARG00000037350.7	none	none	-1,-1,-1,
ENSDART00000036448.8	chr1	+	23274709	23283468	23274770	23283131	11	23274709,23275159,23276804,23277550,23277770,23279644,23279781,23280306,23280555,23280976,23283063,	23274860,23275347,23276898,23277631,23277927,23279702,23279910,23280452,23280626,23281088,23283468,	0	ENSDARG00000022845.8	cmpl	cmpl	0,0,2,0,0,1,2,2,1,0,1,
ENSDART00000144792.2	chr1	+	23274921	23279702	23279702	23279702	6	23274921,23275159,23276804,23277550,23277770,23279644,	23275075,23275347,23276898,23277631,23277927,23279702,	0	ENSDARG00000022845.8	none	none	-1,-1,-1,-1,-1,-1,
ENSDART00000013263.9	chr1	-	23283531	23294753	23284163	23293173	12	23283531,23284374,23286864,23287104,23288956,23290098,23290351,23290954,23292361,23292641,23293011,23294278,	23284265,23284485,23286956,23287244,23289087,23290193,23290499,23291152,23292562,23292743,23293173,23294753,	0	ENSDARG00000019838.11	cmpl	cmpl	0,0,1,2,0,1,0,0,0,0,0,-1,
ENSDART00000122648.3	chr1	-	23284137	23293261	23284163	23293173	11	23284137,23284374,23286864,23287104,23288956,23290098,23290351,23290954,23292361,23292641,23293011,	23284265,23284485,23286956,23287244,23289087,23290193,23290499,23291152,23292562,23292743,23293261,	0	ENSDARG00000019838.11	cmpl	cmpl	0,0,1,2,0,1,0,0,0,0,0,
ENSDART00000008201.9	chr1	-	23297622	23308308	23299047	23304936	5	23297622,23301611,23301856,23304861,23308103,	23299086,23301760,23301905,23304949,23308308,	0	ENSDARG00000005799.9	cmpl	cmpl	0,1,0,0,-1,
ENSDART00000137567.2	chr1	-	23298935	23308225	23299047	23308225	5	23298935,23301611,23301856,23304861,23308123,	23299086,23301760,23301905,23304949,23308225,	0	ENSDARG00000005799.9	cmpl	incmpl	0,1,0,2,2,
ENSDART00000131979.2	chr1	-	23301279	23308262	23308262	23308262	4	23301279,23301856,23304861,23308103,	23301760,23301905,23304949,23308262,	0	ENSDARG00000005799.9	none	none	-1,-1,-1,-1,
ENSDART00000025770.9	chr1	+	23311616	23322588	23312071	23321354	8	23311616,23312796,23312985,23315598,23316096,23317892,23321279,23322572,	23312134,23312890,23313044,23315681,23316196,23318021,23322057,23322588,	0	ENSDARG00000013505.11	cmpl	cmpl	0,0,1,0,2,0,0,-1,
ENSDART00000139003.2	chr1	+	23311616	23322969	23312071	23321354	7	23311616,23312796,23312985,23315598,23316096,23317892,23321279,	23312134,23312890,23313044,23315681,23316196,23318021,23322969,	0	ENSDARG00000013505.11	cmpl	cmpl	0,0,1,0,2,0,0,
ENSDART00000142840.2	chr1	-	23323001	23330066	23330066	23330066	3	23323001,23325634,23329899,	23323711,23325863,23330066,	0	ENSDARG00000055022.8	none	none	-1,-1,-1,
ENSDART00000126785.4	chr1	-	23323169	23370529	23323707	23369631	33	23323169,23329899,23330312,23330480,23330936,23331084,23331807,23332122,23332373,23334373,23334582,23334866,23335024,23337170,23337439,23337691,23338457,23339962,23340183,23341206,23341416,23341646,23341874,23342125,23342322,23342528,23342783,23342951,23343161,23343452,23343728,23369505,23370392,	23323711,23330237,23330388,23330632,23331005,23331204,23331940,23332237,23332578,23334497,23334719,23334935,23335183,23337294,23337600,23337797,23338573,23340102,23340232,23341288,23341530,23341798,23342020,23342220,23342438,23342669,23342864,23343078,23343259,23343539,23343932,23369667,23370529,	0	ENSDARG00000055022.8	cmpl	cmpl	2,0,2,0,0,0,2,1,0,2,0,0,0,2,0,2,0,1,0,2,2,0,1,2,0,0,0,2,0,0,0,0,-1,
ENSDART00000159138.2	chr1	-	23323669	23370618	23323669	23369631	34	23323669,23325634,23329899,23330312,23330480,23330936,23331084,23331807,23332122,23332373,23334373,23334582,23334866,23335024,23337170,23337439,23337691,23338457,23339962,23340183,23341206,23341416,23341646,23341874,23342125,23342322,23342528,23342783,23342951,23343161,23343452,23343728,23369505,23370392,	23323711,23325863,23330237,23330388,23330632,23331005,23331204,23331940,23332237,23332578,23334497,23334719,23334935,23335183,23337294,23337600,23337797,23338573,23340102,23340232,23341288,23341530,23341798,23342020,23342220,23342438,23342669,23342864,23343078,23343259,23343539,23343932,23369667,23370618,	0	ENSDARG00000055022.8	cmpl	cmpl	0,2,0,2,0,0,0,2,1,0,2,0,0,0,2,0,2,0,1,0,2,2,0,1,2,0,0,0,2,0,0,0,0,-1,
ENSDART00000137145.2	chr1	-	23339963	23340503	23340503	23340503	2	23339963,23340183,	23340102,23340503,	0	ENSDARG00000055022.8	none	none	-1,-1,
ENSDART00000140078.2	chr1	-	23340970	23341690	23341690	23341690	2	23340970,23341416,	23341288,23341690,	0	ENSDARG00000055022.8	none	none	-1,-1,
ENSDART00000143014.2	chr1	-	23343762	23370395	23343762	23369631	3	23343762,23369505,23370255,	23343932,23369667,23370395,	0	ENSDARG00000055022.8	incmpl	cmpl	0,0,-1,
ENSDART00000187503.1	chr1	+	23372469	23396454	23372621	23393091	15	23372469,23373312,23374879,23375840,23376396,23376690,23377048,23379879,23380099,23386191,23386433,23388104,23388315,23390299,23393045,	23372892,23374228,23375004,23375929,23376473,23376843,23379432,23379965,23380145,23386346,23386558,23388231,23388498,23390718,23396454,	0	ENSDARG00000061451.6	cmpl	cmpl	0,1,2,1,0,2,2,1,0,1,0,2,0,0,2,
ENSDART00000087658.6	chr1	+	23372493	23393815	23372621	23393091	16	23372493,23373312,23374879,23375840,23376396,23376690,23377048,23379879,23380099,23386191,23386433,23388104,23388315,23390299,23390594,23393045,	23372892,23374228,23375004,23375929,23376473,23376843,23379432,23379965,23380145,23386346,23386558,23388231,23388498,23390468,23390718,23393815,	0	ENSDARG00000061451.6	cmpl	cmpl	0,1,2,1,0,2,2,1,0,1,0,2,0,0,1,2,
ENSDART00000134113.2	chr1	+	23379007	23380210	23380210	23380210	3	23379007,23379879,23380099,	23379432,23379965,23380210,	0	ENSDARG00000061451.6	none	none	-1,-1,-1,
ENSDART00000102646.4	chr1	+	23398404	23398992	23398404	23398992	1	23398404,	23398992,	0	ENSDARG00000070121.6	cmpl	cmpl	0,
ENSDART00000189921.1	chr1	+	23406402	23417937	23406901	23417561	6	23406402,23408612,23412250,23412531,23413348,23416701,	23406947,23408758,23412405,23412715,23413700,23417937,	0	ENSDARG00000054680.7	cmpl	cmpl	0,1,0,2,0,1,
ENSDART00000140706.2	chr1	+	23408621	23417911	23408662	23417561	5	23408621,23412250,23412531,23413348,23416701,	23408758,23412405,23412715,23413700,23417911,	0	ENSDARG00000054680.7	cmpl	cmpl	0,0,2,0,1,
ENSDART00000134576.2	chr1	+	23489268	23506534	23490148	23506392	18	23489268,23490136,23490485,23490941,23491197,23491561,23493706,23495064,23497332,23497591,23497952,23498123,23498352,23498517,23504062,23504253,23505994,23506187,	23489360,23490315,23490590,23491112,23491288,23492154,23494478,23495239,23497490,23497777,23498038,23498186,23498444,23498597,23504151,23504396,23506097,23506534,	0	ENSDARG00000092290.2	cmpl	cmpl	-1,0,2,2,2,0,2,0,1,0,0,2,2,1,0,2,1,2,
ENSDART00000139557.2	chr1	+	23504333	23505103	23505103	23505103	3	23504333,23504511,23504802,	23504396,23504693,23505103,	0	ENSDARG00000092290.2	none	none	-1,-1,-1,
ENSDART00000142928.2	chr1	+	23505665	23506232	23506232	23506232	2	23505665,23506187,	23506097,23506232,	0	ENSDARG00000092290.2	none	none	-1,-1,
ENSDART00000145942.3	chr1	-	23506524	23557877	23507090	23557698	18	23506524,23507877,23509915,23510096,23511771,23515422,23515672,23521626,23522419,23522683,23524408,23524817,23526618,23528017,23530314,23532703,23535561,23557539,	23507181,23508134,23510020,23510205,23511936,23515586,23515803,23521843,23522602,23522801,23524515,23524997,23526714,23528290,23530466,23532839,23536236,23557877,	0	ENSDARG00000055099.7	cmpl	cmpl	2,0,0,2,2,0,1,0,0,2,0,0,0,0,1,0,0,0,
ENSDART00000133659.3	chr1	+	23559477	23573230	23560467	23572825	22	23559477,23560457,23561027,23561333,23561695,23561999,23562189,23562651,23562890,23563325,23563690,23563861,23564569,23564820,23565029,23566635,23568919,23569190,23572124,23572358,23572504,23572698,	23559529,23560575,23561243,23561562,23561841,23562084,23562385,23562801,23563031,23563449,23563780,23564047,23564680,23564940,23565254,23566817,23569082,23569361,23572251,23572403,23572574,23573230,	0	ENSDARG00000070109.6	cmpl	cmpl	-1,0,0,0,1,0,1,2,2,2,0,0,0,0,0,0,2,0,0,1,1,2,
ENSDART00000187824.1	chr1	+	23560215	23572825	23560434	23572825	20	23560215,23561027,23561333,23561695,23561999,23562189,23562651,23562890,23563325,23563690,23563861,23564569,23564820,23565029,23566635,23568919,23569190,23572124,23572504,23572698,	23560575,23561243,23561562,23561841,23562084,23562385,23562801,23563031,23563449,23563780,23564047,23564680,23564940,23565254,23566817,23569082,23569361,23572251,23572574,23572825,	0	ENSDARG00000070109.6	cmpl	cmpl	0,0,0,1,0,1,2,2,2,0,0,0,0,0,0,2,0,0,1,2,
ENSDART00000142879.2	chr1	+	23563690	23572574	23563690	23572574	6	23563690,23563861,23569298,23572124,23572358,23572504,	23563780,23564002,23569361,23572251,23572403,23572574,	0	ENSDARG00000070109.6	incmpl	incmpl	0,0,0,0,1,1,
ENSDART00000138852.3	chr1	-	23573223	23595921	23574992	23595871	8	23573223,23578060,23587602,23588971,23593678,23594470,23594651,23595771,	23575006,23582412,23587675,23589184,23593802,23594550,23594717,23595921,	0	ENSDARG00000070098.7	cmpl	cmpl	1,2,1,1,0,1,1,0,
ENSDART00000134860.3	chr1	-	23574831	23595779	23574918	23595779	7	23574831,23587602,23588971,23593678,23594470,23594651,23595771,	23575006,23587675,23589184,23593802,23594550,23594717,23595779,	0	ENSDARG00000070098.7	cmpl	incmpl	2,1,1,0,1,1,2,
ENSDART00000155184.3	chr1	-	23585029	23596391	23585844	23595871	7	23585029,23587602,23588971,23593678,23594470,23594651,23595771,	23586901,23587675,23589184,23593802,23594550,23594717,23596391,	0	ENSDARG00000070098.7	cmpl	cmpl	2,1,1,0,1,1,0,
ENSDART00000102600.5	chr1	-	23586560	23588996	23586560	23588996	3	23586560,23587602,23588971,	23586901,23587675,23588996,	0	ENSDARG00000070098.7	incmpl	incmpl	2,1,0,
ENSDART00000143588.3	chr1	-	23596730	23598674	23597413	23598615	3	23596730,23598101,23598578,	23597486,23598162,23598674,	0	ENSDARG00000094046.3	cmpl	cmpl	2,1,0,
ENSDART00000144348.3	chr1	-	23597212	23598657	23597413	23598615	3	23597212,23598101,23598578,	23597480,23598162,23598657,	0	ENSDARG00000094046.3	cmpl	cmpl	2,1,0,
ENSDART00000142641.3	chr1	-	23597308	23598662	23597308	23598615	3	23597308,23598101,23598578,	23597476,23598162,23598662,	0	ENSDARG00000094046.3	incmpl	cmpl	2,1,0,
ENSDART00000189894.1	chr1	+	23751098	23751213	23751213	23751213	1	23751098,	23751213,	0	ENSDARG00000114096.1	none	none	-1,
ENSDART00000007531.9	chr1	+	23783348	23910036	23784904	23908705	36	23783348,23786013,23788428,23794956,23848853,23849381,23850995,23853165,23853696,23858086,23858249,23861300,23862842,23864846,23867531,23870003,23870171,23870571,23873508,23873945,23874313,23875320,23876810,23877055,23879114,23879673,23883358,23888811,23889562,23897371,23897608,23897930,23902540,23902845,23903313,23908460,	23785062,23786085,23788500,23795028,23848925,23849453,23851067,23853329,23853829,23858158,23858321,23861372,23862986,23865010,23867682,23870078,23870315,23870715,23873675,23874078,23874382,23875392,23876882,23877127,23879278,23879798,23883456,23888951,23889656,23897509,23897849,23898061,23902695,23903134,23903522,23910036,	0	ENSDARG00000004246.10	cmpl	cmpl	0,2,2,2,2,2,2,2,1,2,2,2,2,2,1,2,2,2,2,1,2,2,2,2,2,1,0,2,1,2,2,0,2,1,2,1,
ENSDART00000187183.1	chr1	+	23784904	23912788	23784904	23908553	38	23784904,23786013,23788428,23794956,23848853,23849381,23850995,23853165,23853696,23858086,23858249,23861300,23862842,23864846,23867531,23870003,23870171,23870571,23873508,23873945,23874313,23875320,23876810,23877055,23879114,23879673,23883358,23888811,23889148,23889562,23897371,23897608,23897930,23902540,23902845,23903313,23905494,23908460,	23785062,23786085,23788500,23795028,23848925,23849453,23851067,23853329,23853829,23858158,23858321,23861372,23862986,23865010,23867682,23870078,23870315,23870715,23873675,23874078,23874382,23875392,23876882,23877127,23879278,23879798,23883456,23888951,23889175,23889656,23897509,23897849,23898061,23902695,23903134,23903522,23905535,23912788,	0	ENSDARG00000004246.10	cmpl	cmpl	0,2,2,2,2,2,2,2,1,2,2,2,2,2,1,2,2,2,2,1,2,2,2,2,2,1,0,2,1,1,2,2,0,2,1,2,1,0,
ENSDART00000183029.1	chr1	+	23784904	23912788	23784904	23908705	35	23784904,23786013,23788428,23794956,23848853,23849381,23850995,23853165,23853696,23858086,23858249,23861300,23862842,23864846,23867531,23870003,23870171,23870571,23873508,23873945,23875320,23876810,23877055,23879114,23879673,23883358,23888811,23889562,23897371,23897608,23897930,23902540,23902845,23903313,23908460,	23785062,23786085,23788500,23795028,23848925,23849453,23851067,23853329,23853829,23858158,23858321,23861372,23862986,23865010,23867682,23870078,23870315,23870715,23873675,23874078,23875392,23876882,23877127,23879278,23879798,23883456,23888951,23889656,23897509,23897849,23898061,23902695,23903134,23903522,23912788,	0	ENSDARG00000004246.10	cmpl	cmpl	0,2,2,2,2,2,2,2,1,2,2,2,2,2,1,2,2,2,2,1,2,2,2,2,1,0,2,1,2,2,0,2,1,2,1,
ENSDART00000188521.1	chr1	+	23784904	23912788	23784904	23908705	37	23784904,23786013,23788428,23794956,23848853,23849381,23850995,23853165,23853696,23858086,23858249,23861300,23862842,23864846,23867531,23870003,23870171,23870571,23873508,23873945,23874313,23875320,23876810,23877055,23879114,23879673,23883358,23888811,23889148,23889562,23897371,23897608,23897930,23902540,23902845,23903313,23908460,	23785062,23786085,23788500,23795028,23848925,23849453,23851067,23853329,23853829,23858158,23858321,23861372,23862986,23865010,23867682,23870078,23870315,23870715,23873675,23874078,23874382,23875392,23876882,23877127,23879278,23879798,23883456,23888951,23889175,23889656,23897509,23897849,23898061,23902695,23903134,23903522,23912788,	0	ENSDARG00000004246.10	cmpl	cmpl	0,2,2,2,2,2,2,2,1,2,2,2,2,2,1,2,2,2,2,1,2,2,2,2,2,1,0,2,1,1,2,2,0,2,1,2,1,
ENSDART00000171951.3	chr1	+	23784904	23912788	23784904	23908553	37	23784904,23786013,23788428,23794956,23848853,23849381,23850995,23853165,23853696,23858086,23858249,23861300,23862842,23864846,23867531,23870003,23870171,23870571,23873508,23873945,23874313,23875320,23876810,23877055,23879114,23879673,23883358,23888811,23889562,23897371,23897608,23897930,23902540,23902845,23903313,23905494,23908460,	23785062,23786085,23788500,23795028,23848925,23849453,23851067,23853329,23853829,23858158,23858321,23861372,23862986,23865010,23867682,23870078,23870315,23870715,23873675,23874078,23874382,23875392,23876882,23877127,23879278,23879798,23883456,23888951,23889656,23897509,23897849,23898061,23902695,23903134,23903522,23905535,23912788,	0	ENSDARG00000004246.10	cmpl	cmpl	0,2,2,2,2,2,2,2,1,2,2,2,2,2,1,2,2,2,2,1,2,2,2,2,2,1,0,2,1,2,2,0,2,1,2,1,0,
ENSDART00000118841.2	chr1	+	23866877	23866965	23866965	23866965	1	23866877,	23866965,	0	ENSDARG00000083023.2	none	none	-1,
ENSDART00000177989.2	chr1	-	23919417	24349789	23922024	24349789	56	23919417,23926180,23936045,23939175,23943604,23945061,23946426,23947789,23957129,23975296,24014565,24023478,24026340,24044362,24045912,24050383,24052227,24079165,24081131,24092395,24132749,24157155,24163621,24187505,24191186,24191488,24197280,24213047,24213479,24214429,24217999,24222768,24225212,24226976,24227314,24243896,24245885,24250199,24250730,24251451,24253736,24254906,24255059,24256071,242…	23922115,23926332,23936242,23939277,23943772,23945217,23946492,23947967,23957219,23975464,24014718,24023598,24026481,24044475,24046028,24050486,24052345,24079302,24081272,24092520,24132916,24157264,24163686,24187567,24191320,24191567,24197456,24213387,24213621,24214537,24218121,24222949,24225366,24227152,24228568,24244089,24246009,24250281,24250839,24251544,24253834,24254969,24255139,24256240,242…	0	ENSDARG00000031108.11	cmpl	cmpl	2,0,1,1,1,1,1,0,0,0,0,0,0,1,2,1,0,1,1,2,0,2,0,1,2,1,2,1,0,0,1,0,2,0,0,2,1,0,2,2,0,0,1,0,0,2,0,0,0,0,2,0,0,1,0,0,
ENSDART00000146960.3	chr1	-	23975296	24255149	23975296	24255149	34	23975296,24014565,24023478,24026340,24044362,24045912,24050383,24052227,24079165,24081131,24092395,24132749,24157155,24163621,24187505,24191192,24191488,24197280,24213047,24213479,24214429,24217999,24222768,24225212,24226976,24227314,24243896,24245885,24250199,24250730,24251451,24253736,24254906,24255059,	23975464,24014718,24023598,24026481,24044475,24046028,24050486,24052345,24079302,24081272,24092520,24132916,24157264,24163686,24187567,24191320,24191567,24197456,24213387,24213621,24214537,24218121,24222949,24225366,24227152,24228568,24244089,24246009,24250281,24250839,24251544,24253834,24254969,24255149,	0	ENSDARG00000031108.11	incmpl	cmpl	0,0,0,0,1,2,1,0,1,1,2,0,2,0,1,2,1,2,1,0,0,1,0,2,0,0,2,1,0,2,2,0,0,0,
ENSDART00000014608.7	chr1	+	24076242	24078099	24076623	24077703	1	24076242,	24078099,	0	ENSDARG00000015266.7	cmpl	cmpl	0,
ENSDART00000158680.2	chr1	+	24114524	24114558	24114558	24114558	1	24114524,	24114558,	0	ENSDARG00000100600.2	none	none	-1,
ENSDART00000142740.3	chr1	-	24263644	24349759	24263644	24349759	9	24263644,24266508,24269344,24270835,24271739,24274799,24279401,24285281,24349657,	24263742,24266655,24269464,24270962,24271861,24274895,24279502,24285513,24349759,	0	ENSDARG00000031108.11	incmpl	incmpl	0,0,0,2,0,0,1,0,0,
ENSDART00000142281.2	chr1	+	24337061	24343477	24343477	24343477	6	24337061,24337372,24337560,24338010,24338572,24343019,	24337098,24337453,24337661,24338080,24338674,24343477,	0	ENSDARG00000092542.2	none	none	-1,-1,-1,-1,-1,-1,
ENSDART00000139364.2	chr1	+	24338391	24343190	24343190	24343190	2	24338391,24343019,	24338674,24343190,	0	ENSDARG00000092542.2	none	none	-1,-1,
ENSDART00000051763.3	chr1	+	24355514	24359653	24355545	24359608	6	24355514,24356109,24356705,24357913,24358462,24359477,	24355607,24356213,24356893,24358122,24358572,24359653,	0	ENSDARG00000035692.3	cmpl	cmpl	0,2,1,0,2,1,
ENSDART00000137066.2	chr1	+	24355522	24357961	24357961	24357961	3	24355522,24356109,24357913,	24355607,24356893,24357961,	0	ENSDARG00000035692.3	none	none	-1,-1,-1,
ENSDART00000143428.2	chr1	+	24355541	24356872	24356872	24356872	2	24355541,24356705,	24356213,24356872,	0	ENSDARG00000035692.3	none	none	-1,-1,
ENSDART00000169389.2	chr1	+	24365581	24367412	24365581	24367412	5	24365581,24365816,24366109,24366939,24367254,	24365671,24365867,24366488,24367116,24367412,	0	ENSDARG00000094885.3	incmpl	cmpl	0,0,0,1,1,
ENSDART00000139913.2	chr1	+	24366109	24367056	24366109	24367056	2	24366109,24366939,	24366488,24367056,	0	ENSDARG00000094885.3	incmpl	incmpl	0,1,
ENSDART00000102542.4	chr1	+	24376393	24380533	24376421	24380486	8	24376393,24376786,24377101,24378416,24378714,24380033,24380216,24380377,	24376449,24376899,24377194,24378513,24378855,24380142,24380300,24380533,	0	ENSDARG00000090822.2	cmpl	cmpl	0,1,0,0,1,1,2,2,
ENSDART00000184421.1	chr1	-	24376697	24462544	24378869	24462544	20	24376697,24394454,24396035,24398271,24398652,24401149,24401951,24402934,24403213,24405259,24405698,24406541,24411089,24411301,24414907,24450801,24451350,24451490,24456155,24462468,	24378889,24394641,24396079,24398498,24398723,24401280,24402027,24403078,24403282,24405500,24405739,24406630,24411203,24412213,24415085,24450934,24451396,24451531,24456195,24462544,	0	ENSDARG00000088202.4	cmpl	cmpl	1,0,1,2,0,1,0,0,0,2,0,1,1,1,0,2,1,2,1,0,
ENSDART00000123789.3	chr1	+	24382650	24385979	24382969	24385935	8	24382650,24383331,24383638,24384468,24384661,24385484,24385673,24385826,	24382997,24383444,24383731,24384565,24384802,24385593,24385757,24385979,	0	ENSDARG00000086859.4	cmpl	cmpl	0,1,0,0,1,1,2,2,
ENSDART00000147363.2	chr1	+	24382966	24384697	24384697	24384697	5	24382966,24383331,24383638,24384468,24384661,	24383105,24383444,24383731,24384565,24384697,	0	ENSDARG00000086859.4	none	none	-1,-1,-1,-1,-1,
ENSDART00000130356.3	chr1	+	24387658	24391673	24387964	24391627	8	24387658,24388308,24388609,24389454,24389646,24391175,24391359,24391518,	24387992,24388421,24388702,24389551,24389787,24391284,24391443,24391673,	0	ENSDARG00000090118.4	cmpl	cmpl	0,1,0,0,1,1,2,2,
ENSDART00000126950.4	chr1	-	24394172	24462691	24394319	24462544	20	24394172,24394454,24396035,24398271,24398652,24401149,24401951,24402934,24403213,24405259,24405698,24406541,24411089,24411301,24414907,24450801,24451350,24451490,24456155,24462468,	24394336,24394641,24396079,24398498,24398723,24401280,24402027,24403078,24403282,24405500,24405739,24406630,24411203,24412213,24415085,24450934,24451396,24451531,24456195,24462691,	0	ENSDARG00000088202.4	cmpl	cmpl	1,0,1,2,0,1,0,0,0,2,0,1,1,1,0,2,1,2,1,0,
ENSDART00000184987.1	chr1	-	24394319	24462544	24394319	24462544	19	24394319,24394454,24396035,24398271,24398652,24401149,24401951,24402934,24405259,24405698,24406541,24411089,24411301,24414907,24450801,24451350,24451490,24456155,24462468,	24394336,24394641,24396079,24398498,24398723,24401280,24402027,24403078,24405500,24405739,24406630,24411203,24412213,24415085,24450934,24451396,24451531,24456195,24462544,	0	ENSDARG00000088202.4	cmpl	cmpl	1,0,1,2,0,1,0,0,2,0,1,1,1,0,2,1,2,1,0,
ENSDART00000181286.1	chr1	-	24394319	24458096	24394319	24458096	20	24394319,24394454,24396035,24398271,24398652,24401149,24401951,24402934,24403213,24405259,24405698,24406541,24411089,24411301,24414907,24450801,24451350,24451490,24456155,24458020,	24394336,24394641,24396079,24398498,24398723,24401280,24402027,24403078,24403282,24405500,24405739,24406630,24411203,24412213,24415085,24450934,24451396,24451531,24456195,24458096,	0	ENSDARG00000088202.4	cmpl	cmpl	1,0,1,2,0,1,0,0,0,2,0,1,1,1,0,2,1,2,1,0,
ENSDART00000140197.2	chr1	-	24412167	24458057	24412167	24458057	7	24412167,24414907,24450801,24451350,24451490,24456155,24458020,	24412213,24415085,24450934,24451396,24451531,24456195,24458057,	0	ENSDARG00000088202.4	incmpl	incmpl	1,0,2,1,2,1,0,
ENSDART00000176581.2	chr1	+	24469312	24511625	24487080	24511625	13	24469312,24482405,24486977,24488873,24491387,24493680,24493851,24495994,24496293,24500756,24503615,24507986,24511428,	24469632,24482533,24487185,24489566,24491546,24493767,24494019,24496074,24496493,24501698,24503794,24508101,24511625,	0	ENSDARG00000061021.7	cmpl	cmpl	-1,-1,0,0,0,0,0,0,2,1,1,0,1,
ENSDART00000163140.2	chr1	+	24482405	24514673	24487080	24511625	12	24482405,24486997,24488873,24491387,24493680,24493851,24495994,24496293,24500756,24503615,24507986,24511428,	24482533,24487185,24489566,24491546,24493767,24494019,24496074,24496493,24501698,24503794,24508101,24514673,	0	ENSDARG00000061021.7	cmpl	cmpl	-1,0,0,0,0,0,0,2,1,1,0,1,
ENSDART00000102522.4	chr1	-	24520502	24558838	24520956	24557257	13	24520502,24523137,24523379,24523923,24526161,24527128,24531913,24535948,24540575,24540774,24552208,24554761,24557093,	24521082,24523272,24523458,24524057,24526354,24527173,24531998,24536062,24540698,24540973,24552322,24554912,24558838,	0	ENSDARG00000037309.7	cmpl	cmpl	0,0,2,0,2,2,1,1,1,0,0,2,0,
ENSDART00000131938.2	chr1	-	24540417	24552267	24552267	24552267	3	24540417,24540774,24552208,	24540698,24540973,24552267,	0	ENSDARG00000037309.7	none	none	-1,-1,-1,
ENSDART00000076519.5	chr1	+	24557413	24558749	24557529	24558021	1	24557413,	24558749,	0	ENSDARG00000054334.5	cmpl	cmpl	0,
ENSDART00000186429.1	chr1	-	24825146	24825263	24825263	24825263	1	24825146,	24825263,	0	ENSDARG00000116715.1	none	none	-1,
ENSDART00000132355.4	chr1	-	24870660	25144439	24871088	25024662	13	24870660,24876739,24879786,24882517,24896690,24899306,24899612,24902672,24907934,24913626,25023975,25084508,25143963,	24871357,24876950,24880012,24882699,24896804,24899443,24899736,24902807,24908064,24913694,25024731,25084564,25144439,	0	ENSDARG00000060994.7	cmpl	cmpl	1,0,2,0,0,1,0,0,2,0,0,-1,-1,
ENSDART00000148076.3	chr1	-	24870660	24918686	24871088	24918493	11	24870660,24876739,24879786,24882517,24896690,24899306,24899612,24902672,24907934,24913626,24918454,	24871357,24876950,24880012,24882699,24896804,24899443,24899736,24902807,24908064,24913694,24918686,	0	ENSDARG00000060994.7	cmpl	cmpl	1,0,2,0,0,1,0,0,2,0,0,
ENSDART00000176684.2	chr1	+	25120088	25120205	25120205	25120205	1	25120088,	25120205,	0	ENSDARG00000106456.2	none	none	-1,
ENSDART00000144711.2	chr1	-	25154075	25177086	25165276	25176950	9	25154075,25165262,25167695,25169972,25173819,25174129,25174919,25175138,25176895,	25154660,25165311,25167769,25170024,25174029,25174174,25174958,25175177,25177086,	0	ENSDARG00000074776.5	cmpl	cmpl	-1,1,2,1,1,1,1,1,0,
ENSDART00000177225.2	chr1	-	25165262	25177225	25165276	25176950	8	25165262,25167695,25169972,25173819,25174129,25174919,25175138,25176895,	25165311,25167769,25170024,25174029,25174174,25174958,25175177,25177225,	0	ENSDARG00000074776.5	cmpl	cmpl	1,2,1,1,1,1,1,0,
ENSDART00000054265.7	chr1	+	25178105	25214764	25178160	25214021	8	25178105,25181202,25181410,25183286,25187271,25187441,25208695,25213869,	25178163,25181268,25181468,25183435,25187346,25187556,25208740,25214764,	0	ENSDARG00000074451.4	cmpl	cmpl	0,0,0,1,0,0,1,1,
ENSDART00000141648.2	chr1	+	25178111	25216235	25178160	25215897	8	25178111,25181202,25181410,25183286,25187271,25187441,25208695,25215790,	25178163,25181268,25181468,25183435,25187346,25187556,25208740,25216235,	0	ENSDARG00000074451.4	cmpl	cmpl	0,0,0,1,0,0,1,1,
ENSDART00000133208.2	chr1	+	25218176	25316149	25218176	25315950	34	25218176,25219113,25231259,25255446,25265918,25267500,25268839,25272631,25274509,25281177,25281348,25281545,25283158,25283852,25284948,25286468,25286694,25289911,25290526,25290721,25293850,25294196,25296728,25297005,25305214,25306401,25306986,25308616,25308990,25310833,25313009,25313243,25313405,25315635,	25218415,25219184,25231297,25255518,25266042,25267617,25268944,25272709,25274663,25281236,25281454,25281648,25283303,25284023,25285018,25286589,25286764,25290021,25290596,25290837,25293993,25294383,25296914,25297152,25305758,25306532,25307120,25308793,25309069,25310943,25313139,25313320,25313542,25316149,	0	ENSDARG00000079434.6	incmpl	cmpl	2,1,0,2,2,0,0,0,0,1,0,1,2,0,0,1,2,0,2,0,2,1,2,2,2,0,2,1,1,2,1,2,1,0,
ENSDART00000144340.3	chr1	+	25218270	25256001	25256001	25256001	4	25218270,25219113,25231259,25255446,	25218415,25219184,25231297,25256001,	0	ENSDARG00000079434.6	none	none	-1,-1,-1,-1,
ENSDART00000145373.2	chr1	+	25219126	25267709	25267709	25267709	5	25219126,25231259,25255446,25265918,25267500,	25219184,25231297,25255518,25266042,25267709,	0	ENSDARG00000079434.6	none	none	-1,-1,-1,-1,-1,
ENSDART00000050445.7	chr1	-	25322444	25370281	25323087	25344985	12	25322444,25324413,25326364,25327142,25327821,25328129,25331453,25336354,25337331,25340193,25344851,25370115,	25323240,25324554,25326435,25327311,25327989,25328233,25332180,25336535,25337483,25340428,25345030,25370281,	0	ENSDARG00000031817.8	cmpl	cmpl	0,0,1,0,0,1,0,2,0,2,0,-1,
ENSDART00000134470.3	chr1	-	25399513	25438737	25401341	25420020	12	25399513,25403624,25403945,25404267,25404496,25405464,25406049,25406445,25408969,25412214,25419573,25438621,	25403507,25403789,25404063,25404338,25404604,25405535,25406150,25406531,25409072,25412276,25420460,25438737,	0	ENSDARG00000074812.5	cmpl	cmpl	0,0,2,0,0,1,2,0,2,0,0,-1,
ENSDART00000111686.4	chr1	-	25401341	25438934	25401341	25420020	12	25401341,25403624,25403945,25404267,25404496,25405464,25406049,25406445,25408969,25412214,25419573,25438621,	25403507,25403789,25404063,25404338,25404604,25405535,25406150,25406531,25409072,25412276,25420467,25438934,	0	ENSDARG00000074812.5	cmpl	cmpl	0,0,2,0,0,1,2,0,2,0,0,-1,
ENSDART00000102501.5	chr1	-	25442698	25486571	25443066	25466882	8	25442698,25446351,25448423,25451229,25453152,25461138,25466789,25486336,	25443222,25446526,25448581,25451451,25453265,25461241,25466888,25486571,	0	ENSDARG00000070055.6	cmpl	cmpl	0,2,0,0,1,0,0,-1,
ENSDART00000141892.3	chr1	-	25442715	25486527	25443066	25479638	9	25442715,25446351,25448423,25451229,25453152,25461138,25466789,25479323,25486336,	25443222,25446526,25448581,25451451,25453265,25461241,25466888,25479640,25486527,	0	ENSDARG00000070055.6	cmpl	cmpl	0,2,0,0,1,0,0,0,-1,
ENSDART00000134200.2	chr1	-	25446509	25486471	25446509	25466882	8	25446509,25448423,25451229,25453152,25454167,25461138,25466789,25486336,	25446526,25448581,25451451,25453265,25454269,25461241,25466888,25486471,	0	ENSDARG00000070055.6	incmpl	cmpl	2,0,0,1,1,0,0,-1,
ENSDART00000131628.2	chr1	-	25478766	25486419	25486419	25486419	2	25478766,25486336,	25479640,25486419,	0	ENSDARG00000070055.6	none	none	-1,-1,
ENSDART00000102498.5	chr1	-	25491323	25496133	25491620	25496102	3	25491323,25495414,25495606,	25491928,25495495,25496133,	0	ENSDARG00000070050.5	cmpl	cmpl	1,1,0,
ENSDART00000139672.2	chr1	-	25555724	25557930	25557930	25557930	3	25555724,25557646,25557888,	25556310,25557790,25557930,	0	ENSDARG00000095408.2	none	none	-1,-1,-1,
ENSDART00000135763.2	chr1	-	25624757	25648568	25624757	25648568	6	25624757,25625852,25631221,25642165,25642504,25646899,	25625008,25626881,25631458,25642397,25642696,25648568,	0	ENSDARG00000037286.9	incmpl	incmpl	1,1,1,0,0,2,
ENSDART00000054235.7	chr1	+	25650916	25666604	25651057	25666089	15	25650916,25651254,25654553,25654813,25654969,25656069,25659417,25659720,25660623,25660847,25663997,25664201,25664810,25665099,25666029,	25651066,25651361,25654690,25654867,25655063,25656160,25659510,25659813,25660773,25660949,25664100,25664310,25664950,25665293,25666604,	0	ENSDARG00000037283.9	cmpl	cmpl	0,0,2,1,1,2,0,0,0,0,0,1,2,1,0,
ENSDART00000054230.6	chr1	-	25669798	25679383	25670049	25679303	9	25669798,25672448,25674405,25674708,25676009,25676252,25678203,25679106,25679243,	25670234,25672726,25674590,25674842,25676140,25676337,25678387,25679160,25679383,	0	ENSDARG00000037281.7	cmpl	cmpl	1,2,0,1,2,1,0,0,0,
ENSDART00000161703.2	chr1	-	25669807	25679339	25672684	25679303	9	25669807,25672448,25674405,25674708,25676009,25676252,25678203,25679106,25679243,	25670234,25672727,25674590,25674842,25676140,25676337,25678387,25679160,25679339,	0	ENSDARG00000037281.7	cmpl	cmpl	-1,2,0,1,2,1,0,0,0,
ENSDART00000109646.4	chr1	-	25672441	25676099	25676099	25676099	3	25672441,25674405,25676009,	25672726,25674842,25676099,	0	ENSDARG00000037281.7	none	none	-1,-1,-1,
ENSDART00000135854.2	chr1	-	25675696	25676340	25676340	25676340	2	25675696,25676252,	25676140,25676340,	0	ENSDARG00000037281.7	none	none	-1,-1,
ENSDART00000054228.6	chr1	+	25696797	25698039	25696825	25697585	2	25696797,25697432,	25697350,25698039,	0	ENSDARG00000037278.6	cmpl	cmpl	0,0,
ENSDART00000134609.2	chr1	-	25709812	25711803	25711803	25711803	3	25709812,25710933,25711617,	25710025,25711106,25711803,	0	ENSDARG00000070039.5	none	none	-1,-1,-1,
ENSDART00000141020.2	chr1	+	25719890	25721702	25721702	25721702	2	25719890,25721304,	25720161,25721702,	0	ENSDARG00000091184.4	none	none	-1,-1,
ENSDART00000140172.2	chr1	+	25732714	25733867	25732714	25733867	1	25732714,	25733867,	0	ENSDARG00000094763.3	incmpl	incmpl	2,
ENSDART00000133937.3	chr1	-	25737766	25749888	25738183	25749657	14	25737766,25741447,25741787,25742050,25742697,25742900,25743810,25745972,25746190,25746451,25748006,25749377,25749582,25749768,	25738303,25741583,25741933,25742212,25742787,25743057,25743881,25746028,25746275,25746657,25748627,25749489,25749657,25749888,	0	ENSDARG00000037276.8	cmpl	cmpl	0,2,0,0,0,2,0,1,0,1,1,0,0,-1,
ENSDART00000191571.1	chr1	-	25737779	25749657	25738183	25749657	13	25737779,25741447,25741787,25742050,25742697,25742900,25743810,25745972,25746190,25746451,25748006,25749377,25749582,	25738303,25741583,25741933,25742212,25742787,25743057,25743881,25746028,25746275,25746657,25748627,25749489,25749657,	0	ENSDARG00000037276.8	cmpl	cmpl	0,2,0,0,0,2,0,1,0,1,1,0,0,
ENSDART00000102455.6	chr1	+	25783800	25799051	25783999	25798521	8	25783800,25784447,25784981,25785151,25792067,25794612,25795237,25798364,	25784233,25784506,25785070,25785867,25792553,25794756,25795392,25799051,	0	ENSDARG00000013787.11	cmpl	cmpl	0,0,2,1,0,0,0,2,
ENSDART00000143822.2	chr1	+	25783800	25792713	25792713	25792713	5	25783800,25784447,25784981,25785151,25792067,	25784233,25784506,25785070,25785867,25792713,	0	ENSDARG00000013787.11	none	none	-1,-1,-1,-1,-1,
ENSDART00000129471.3	chr1	+	25801647	25841659	25801822	25841539	13	25801647,25802240,25803299,25803546,25804556,25811255,25812604,25813347,25814506,25827370,25832251,25839127,25841421,	25801825,25802314,25803400,25803665,25804754,25811486,25812721,25813481,25814704,25827608,25832392,25839282,25841659,	0	ENSDARG00000086790.3	cmpl	cmpl	0,0,2,1,0,0,0,0,2,2,0,0,2,
ENSDART00000132082.2	chr1	+	25804641	25812959	25812959	25812959	3	25804641,25811255,25812604,	25804754,25811486,25812959,	0	ENSDARG00000086790.3	none	none	-1,-1,-1,
ENSDART00000027973.6	chr1	+	25848230	25851575	25848647	25851325	4	25848230,25848791,25851083,25851274,	25848714,25848964,25851191,25851575,	0	ENSDARG00000006427.6	cmpl	cmpl	0,1,0,0,
ENSDART00000136984.2	chr1	+	25848614	25849235	25849235	25849235	2	25848614,25848791,	25848714,25849235,	0	ENSDARG00000006427.6	none	none	-1,-1,
ENSDART00000166974.2	chr1	-	25862965	25863639	25863639	25863639	2	25862965,25863085,	25863005,25863639,	0	ENSDARG00000104824.2	none	none	-1,-1,
ENSDART00000145012.2	chr1	-	25886436	25911292	25886436	25911292	9	25886436,25889224,25898766,25900598,25901757,25902044,25904356,25905425,25911115,	25886605,25889374,25898913,25900704,25901840,25902158,25904491,25905518,25911292,	0	ENSDARG00000076499.5	incmpl	cmpl	0,0,0,2,0,0,0,0,0,
ENSDART00000109714.4	chr1	-	25897230	25911901	25898676	25911292	7	25897230,25900598,25901757,25902044,25904356,25905425,25911115,	25898913,25900704,25901840,25902158,25904491,25905518,25911901,	0	ENSDARG00000076499.5	cmpl	cmpl	0,2,0,0,0,0,0,
ENSDART00000136321.3	chr1	-	25917590	25936679	25918278	25932149	5	25917590,25920432,25929187,25931990,25936563,	25918504,25920616,25929299,25932157,25936679,	0	ENSDARG00000037266.8	cmpl	cmpl	2,1,0,0,-1,
ENSDART00000146488.3	chr1	-	25918218	25936677	25918278	25934291	6	25918218,25920432,25929187,25931990,25934206,25936563,	25918504,25920616,25929299,25932157,25934319,25936677,	0	ENSDARG00000037266.8	cmpl	cmpl	2,1,0,1,0,-1,
ENSDART00000145740.2	chr1	-	25918273	25936641	25920598	25934291	5	25918273,25920432,25931990,25934206,25936563,	25918504,25920616,25932157,25934319,25936641,	0	ENSDARG00000037266.8	cmpl	cmpl	-1,0,1,0,-1,
ENSDART00000193375.1	chr1	-	25959083	25966411	25959700	25964146	3	25959083,25962592,25966015,	25960129,25964459,25966411,	0	ENSDARG00000077157.5	cmpl	cmpl	0,0,-1,
ENSDART00000137869.2	chr1	-	25961375	25966068	25962292	25964146	2	25961375,25966011,	25964459,25966068,	0	ENSDARG00000077157.5	cmpl	cmpl	0,-1,
ENSDART00000134192.2	chr1	-	25963693	25966082	25963693	25964146	2	25963693,25966015,	25964459,25966082,	0	ENSDARG00000077157.5	incmpl	cmpl	0,-1,
ENSDART00000054202.8	chr1	-	26011478	26023678	26013222	26023386	8	26011478,26013366,26014898,26015140,26016628,26017717,26017911,26023298,	26013270,26013429,26015003,26015248,26016699,26017787,26018036,26023678,	0	ENSDARG00000037256.8	cmpl	cmpl	0,0,0,0,1,0,1,0,
ENSDART00000182428.1	chr1	+	26012667	26045715	26012667	26045715	12	26012667,26018549,26019584,26020199,26021927,26022324,26024440,26031011,26031114,26033240,26041616,26045679,	26012707,26018562,26019602,26020223,26021937,26022341,26024459,26031017,26031149,26033242,26041636,26045715,	0	ENSDARG00000116236.1	incmpl	incmpl	0,1,2,2,2,0,2,0,0,2,1,0,
ENSDART00000170878.2	chr1	-	26025291	26027337	26025419	26026956	4	26025291,26026095,26026914,26027287,	26025531,26026817,26026990,26027337,	0	ENSDARG00000069998.7	cmpl	cmpl	2,0,0,-1,
ENSDART00000171292.2	chr1	-	26025334	26027327	26025419	26026956	5	26025334,26026095,26026669,26026914,26027287,	26025531,26026468,26026817,26026990,26027327,	0	ENSDARG00000069998.7	cmpl	cmpl	2,1,0,0,-1,
ENSDART00000102346.5	chr1	-	26025419	26026956	26025419	26026956	3	26025419,26026095,26026914,	26025531,26026817,26026956,	0	ENSDARG00000069998.7	cmpl	cmpl	2,0,0,
ENSDART00000193593.1	chr1	-	26036122	26045584	26036268	26044942	5	26036122,26039787,26042644,26044749,26045525,	26036719,26039903,26042916,26045007,26045584,	0	ENSDARG00000053995.8	cmpl	cmpl	2,0,1,0,-1,
ENSDART00000172737.2	chr1	-	26036122	26045560	26036268	26044942	5	26036122,26039787,26042644,26044749,26045490,	26036719,26039903,26042916,26045007,26045560,	0	ENSDARG00000053995.8	cmpl	cmpl	2,0,1,0,-1,
ENSDART00000129259.5	chr1	-	26036146	26045007	26036268	26044942	4	26036146,26039787,26042644,26044749,	26036719,26039903,26042916,26045007,	0	ENSDARG00000053995.8	cmpl	cmpl	2,0,1,0,
ENSDART00000076120.6	chr1	-	26039114	26045565	26039741	26044942	4	26039114,26042644,26044749,26045490,	26039903,26042916,26045007,26045565,	0	ENSDARG00000053995.8	cmpl	cmpl	0,1,0,-1,
ENSDART00000185348.1	chr1	-	26046147	26062798	26047354	26062789	11	26046147,26050345,26051130,26051476,26052582,26053270,26054730,26056537,26057387,26058401,26062743,	26047406,26050485,26051241,26051584,26052697,26053368,26054952,26056651,26057485,26058701,26062798,	0	ENSDARG00000021702.10	cmpl	cmpl	2,0,0,0,2,0,0,0,1,1,0,
ENSDART00000168640.2	chr1	-	26046147	26063188	26047354	26062789	12	26046147,26050345,26051130,26051476,26052582,26053270,26054730,26056537,26057387,26058401,26062743,26062974,	26047406,26050485,26051241,26051584,26052697,26053368,26054952,26056651,26057485,26058701,26062817,26063188,	0	ENSDARG00000021702.10	cmpl	cmpl	2,0,0,0,2,0,0,0,1,1,0,-1,
ENSDART00000185187.1	chr1	-	26047354	26071535	26047354	26062789	12	26047354,26050345,26051130,26051476,26052582,26053270,26054730,26056537,26057387,26058401,26062743,26071443,	26047406,26050485,26051241,26051584,26052697,26053368,26054952,26056651,26057485,26058701,26062817,26071535,	0	ENSDARG00000021702.10	cmpl	cmpl	2,0,0,0,2,0,0,0,1,1,0,-1,
ENSDART00000171752.2	chr1	-	26051480	26063159	26063159	26063159	7	26051480,26054887,26056537,26057387,26058401,26062743,26062974,	26051545,26054952,26056651,26057485,26058701,26062817,26063159,	0	ENSDARG00000021702.10	none	none	-1,-1,-1,-1,-1,-1,-1,
ENSDART00000059264.6	chr1	+	26071868	26096572	26072036	26093445	6	26071868,26072521,26074421,26085716,26088892,26093287,	26072100,26072618,26074451,26085831,26089052,26096572,	0	ENSDARG00000054031.7	cmpl	cmpl	0,1,2,2,0,1,
ENSDART00000054205.7	chr1	+	26099249	26103232	26099331	26103150	4	26099249,26099642,26100823,26103081,	26099511,26099735,26100868,26103232,	0	ENSDARG00000037259.7	cmpl	cmpl	0,0,0,0,
ENSDART00000166226.2	chr1	+	26099292	26101025	26101025	26101025	3	26099292,26099642,26100823,	26099511,26099735,26101025,	0	ENSDARG00000037259.7	none	none	-1,-1,-1,
ENSDART00000102379.5	chr1	+	26105140	26109961	26106644	26109644	3	26105140,26105435,26106641,	26105333,26105501,26109961,	0	ENSDARG00000037260.8	cmpl	cmpl	-1,-1,0,
ENSDART00000127154.3	chr1	+	26105159	26107107	26106644	26107107	3	26105159,26105435,26106572,	26105333,26105501,26107107,	0	ENSDARG00000037260.8	cmpl	incmpl	-1,-1,0,
ENSDART00000054208.8	chr1	+	26110984	26127944	26111068	26127588	8	26110984,26119303,26119602,26119781,26123512,26123704,26127306,26127549,	26111092,26119390,26119661,26119949,26123615,26123944,26127429,26127944,	0	ENSDARG00000037261.9	cmpl	cmpl	0,0,0,2,2,0,0,0,
ENSDART00000171989.2	chr1	+	26111384	26119624	26119624	26119624	3	26111384,26119303,26119602,	26111460,26119390,26119624,	0	ENSDARG00000037261.9	none	none	-1,-1,-1,
ENSDART00000193973.1	chr1	-	26127817	26131088	26127817	26131088	3	26127817,26129058,26130962,	26127835,26129304,26131088,	0	ENSDARG00000037262.7	cmpl	cmpl	0,0,0,
ENSDART00000054209.7	chr1	-	26129052	26131088	26129052	26131088	2	26129052,26130962,	26129304,26131088,	0	ENSDARG00000037262.7	cmpl	cmpl	0,0,
ENSDART00000169362.2	chr1	-	26183738	26185594	26185594	26185594	3	26183738,26184668,26185427,	26183813,26184779,26185594,	0	ENSDARG00000104309.2	none	none	-1,-1,-1,
ENSDART00000168594.2	chr1	-	26250728	26294995	26253191	26293203	3	26250728,26292378,26294537,	26253236,26293317,26294995,	0	ENSDARG00000077817.6	cmpl	cmpl	0,0,-1,
ENSDART00000160381.2	chr1	-	26252907	26294703	26294703	26294703	2	26252907,26294537,	26253236,26294703,	0	ENSDARG00000077817.6	none	none	-1,-1,
ENSDART00000112899.4	chr1	-	26253191	26292897	26253191	26292897	2	26253191,26292378,	26253236,26292897,	0	ENSDARG00000077817.6	cmpl	cmpl	0,0,
ENSDART00000180140.1	chr1	-	26289357	26293203	26289357	26293203	2	26289357,26292367,	26289370,26293203,	0	ENSDARG00000077817.6	cmpl	cmpl	2,0,
ENSDART00000185410.1	chr1	-	26289357	26292897	26289357	26292897	3	26289357,26292325,26292397,	26289370,26292373,26292897,	0	ENSDARG00000077817.6	cmpl	cmpl	2,2,0,
ENSDART00000176681.2	chr1	-	26350525	26350641	26350641	26350641	1	26350525,	26350641,	0	ENSDARG00000107180.2	none	none	-1,
ENSDART00000176380.2	chr1	+	26356204	26402046	26374285	26401832	11	26356204,26374252,26377078,26377248,26377505,26377843,26378071,26378354,26378659,26382736,26401826,	26356750,26376989,26377169,26377342,26377714,26377994,26378161,26378492,26378993,26384013,26402046,	0	ENSDARG00000076928.8	cmpl	cmpl	-1,0,1,2,0,2,0,0,0,1,0,
ENSDART00000190064.1	chr1	+	26356204	26398581	26374285	26397980	11	26356204,26374252,26377078,26377248,26377505,26377843,26378071,26378354,26378659,26382736,26397929,	26356750,26376989,26377169,26377342,26377714,26377994,26378161,26378492,26378993,26384013,26398581,	0	ENSDARG00000076928.8	cmpl	cmpl	-1,0,1,2,0,2,0,0,0,1,0,
ENSDART00000113020.4	chr1	+	26356359	26387308	26374285	26384073	10	26356359,26374252,26377078,26377248,26377505,26377843,26378071,26378354,26378659,26382736,	26356750,26376989,26377169,26377342,26377714,26377994,26378161,26378492,26378993,26387308,	0	ENSDARG00000076928.8	cmpl	cmpl	-1,0,1,2,0,2,0,0,0,1,
ENSDART00000169642.2	chr1	-	26389152	26394460	26394460	26394460	6	26389152,26389668,26392238,26392364,26394164,26394336,	26389577,26389736,26392278,26392434,26394253,26394460,	0	ENSDARG00000009685.12	none	none	-1,-1,-1,-1,-1,-1,
ENSDART00000160183.2	chr1	-	26390323	26398361	26392143	26398248	12	26390323,26392238,26392364,26394164,26394336,26394547,26394929,26395106,26397384,26397516,26397702,26398070,	26392166,26392278,26392434,26394253,26394464,26394674,26395016,26395226,26397438,26397555,26397767,26398361,	0	ENSDARG00000009685.12	cmpl	cmpl	1,0,2,0,1,0,0,0,0,0,1,0,
ENSDART00000023904.10	chr1	-	26391754	26398274	26397527	26398248	12	26391754,26392238,26392364,26394164,26394336,26394547,26394929,26395106,26397384,26397516,26397691,26398070,	26392166,26392278,26392434,26394253,26394464,26394674,26395016,26395226,26397438,26397555,26397767,26398274,	0	ENSDARG00000009685.12	cmpl	cmpl	-1,-1,-1,-1,-1,-1,-1,-1,-1,2,1,0,
ENSDART00000171614.2	chr1	-	26394364	26398303	26398303	26398303	9	26394364,26394547,26394929,26395106,26397384,26397516,26397702,26398070,26398265,	26394464,26394674,26395016,26395226,26397438,26397555,26397767,26398154,26398303,	0	ENSDARG00000009685.12	none	none	-1,-1,-1,-1,-1,-1,-1,-1,-1,
ENSDART00000167489.2	chr1	-	26395115	26398289	26398289	26398289	4	26395115,26397384,26397702,26398070,	26395226,26397555,26397767,26398289,	0	ENSDARG00000009685.12	none	none	-1,-1,-1,-1,
ENSDART00000112263.4	chr1	+	26411495	26437820	26411495	26437371	14	26411495,26420011,26420875,26422828,26423079,26423622,26424755,26424985,26426108,26427805,26432221,26432422,26434872,26437188,	26411747,26420196,26420993,26422976,26423097,26423822,26424889,26425090,26426231,26428117,26432353,26432624,26435075,26437820,	0	ENSDARG00000079377.7	incmpl	cmpl	1,1,0,1,2,2,1,0,0,0,0,0,1,0,
ENSDART00000162879.2	chr1	-	26438596	26439350	26439350	26439350	2	26438596,26439273,	26439096,26439350,	0	ENSDARG00000091678.5	none	none	-1,-1,
ENSDART00000125690.5	chr1	-	26438597	26444075	26438791	26443716	6	26438597,26442245,26442482,26443035,26443314,26443560,	26439415,26442398,26442642,26443220,26443476,26444075,	0	ENSDARG00000091678.5	cmpl	cmpl	0,0,2,0,0,0,
ENSDART00000046376.9	chr1	+	26444985	26465429	26445640	26463367	13	26444985,26445614,26445827,26445983,26448118,26449466,26453648,26453987,26454564,26456239,26456399,26456661,26463085,	26445189,26445735,26445909,26446157,26448209,26449569,26453835,26454089,26454667,26456299,26456525,26456780,26465429,	0	ENSDARG00000014790.11	cmpl	cmpl	-1,0,2,0,0,1,2,0,0,1,1,1,0,
ENSDART00000180810.1	chr1	+	26445614	26466002	26445640	26463367	12	26445614,26445827,26445983,26448118,26449466,26453648,26453987,26454564,26456239,26456399,26456661,26463085,	26445735,26445909,26446157,26448209,26449569,26453835,26454089,26454667,26456299,26456525,26456780,26466002,	0	ENSDARG00000014790.11	cmpl	cmpl	0,2,0,0,1,2,0,0,1,1,1,0,
ENSDART00000112329.6	chr1	+	26467070	26508144	26467231	26507265	26	26467070,26467881,26473592,26473783,26474116,26476246,26476454,26480456,26480603,26480827,26484584,26487181,26487403,26489795,26491143,26495636,26496688,26497479,26497884,26498364,26498625,26501065,26501234,26504955,26505144,26507181,	26467297,26467968,26473657,26473860,26474128,26476347,26476557,26480512,26480724,26481006,26484725,26487270,26487558,26490001,26491164,26495747,26496807,26497661,26498006,26498503,26498789,26501125,26501333,26505051,26505360,26508144,	0	ENSDARG00000019581.10	cmpl	cmpl	0,0,0,2,1,1,0,1,0,1,0,0,2,1,0,0,0,2,1,0,1,0,0,0,0,0,
ENSDART00000168439.2	chr1	+	26467070	26473854	26473854	26473854	3	26467070,26467881,26473592,	26467297,26467968,26473854,	0	ENSDARG00000019581.10	none	none	-1,-1,-1,
ENSDART00000159318.2	chr1	+	26467081	26480706	26467231	26480706	8	26467081,26467881,26473592,26473783,26476246,26476454,26480456,26480603,	26467297,26467968,26473657,26473860,26476347,26476557,26480512,26480706,	0	ENSDARG00000019581.10	cmpl	incmpl	0,0,0,2,1,0,1,0,
ENSDART00000011809.7	chr1	+	26467231	26509316	26467231	26507265	25	26467231,26467881,26473592,26473783,26476246,26476454,26480456,26480603,26480827,26484584,26487181,26487403,26489795,26491143,26495636,26496688,26497479,26497884,26498364,26498625,26501065,26501234,26504955,26505144,26507181,	26467297,26467968,26473657,26473860,26476347,26476557,26480512,26480724,26481006,26484725,26487270,26487558,26490001,26491164,26495747,26496807,26497661,26498006,26498503,26498789,26501125,26501333,26505051,26505360,26509316,	0	ENSDARG00000019581.10	cmpl	cmpl	0,0,0,2,1,0,1,0,1,0,0,2,1,0,0,0,2,1,0,1,0,0,0,0,0,
ENSDART00000193833.1	chr1	+	26467231	26509316	26467231	26507265	25	26467231,26467881,26473592,26473783,26474116,26476246,26476454,26480456,26480603,26480827,26484584,26487181,26487403,26489795,26495636,26496688,26497479,26497884,26498364,26498625,26501065,26501234,26504955,26505144,26507181,	26467297,26467968,26473657,26473860,26474128,26476347,26476557,26480512,26480724,26481006,26484725,26487270,26487558,26490001,26495747,26496807,26497661,26498006,26498503,26498789,26501125,26501333,26505051,26505360,26509316,	0	ENSDARG00000019581.10	cmpl	cmpl	0,0,0,2,1,1,0,1,0,1,0,0,2,1,0,0,2,1,0,1,0,0,0,0,0,
ENSDART00000159345.2	chr1	+	26467252	26474380	26474380	26474380	5	26467252,26467881,26473592,26473783,26474116,	26467297,26467968,26473657,26473860,26474380,	0	ENSDARG00000019581.10	none	none	-1,-1,-1,-1,-1,
ENSDART00000164430.2	chr1	+	26480889	26498006	26480889	26498006	9	26480889,26484584,26487181,26487403,26489795,26495636,26496688,26497479,26497884,	26481006,26484725,26487270,26487558,26490001,26495747,26496807,26497661,26498006,	0	ENSDARG00000019581.10	incmpl	incmpl	0,0,0,2,1,0,0,2,1,
ENSDART00000169297.2	chr1	+	26495640	26496930	26496930	26496930	2	26495640,26496688,	26495747,26496930,	0	ENSDARG00000019581.10	none	none	-1,-1,
ENSDART00000152117.3	chr1	-	26538445	26544268	26539426	26544268	10	26538445,26539605,26539940,26540200,26541287,26541438,26541738,26542155,26542675,26544070,	26539436,26539735,26540117,26540582,26541338,26541536,26541984,26542420,26542893,26544268,	0	ENSDARG00000096665.3	cmpl	incmpl	2,1,1,0,0,1,1,0,1,1,
ENSDART00000152260.2	chr1	-	26538960	26539624	26539624	26539624	2	26538960,26539580,	26539436,26539624,	0	ENSDARG00000096665.3	none	none	-1,-1,
ENSDART00000152506.3	chr1	+	26551033	26554839	26554839	26554839	9	26551033,26551419,26551719,26551999,26552213,26552750,26553215,26553549,26553848,	26551248,26551588,26551797,26552097,26552264,26553132,26553392,26553679,26554839,	0	ENSDARG00000079925.5	none	none	-1,-1,-1,-1,-1,-1,-1,-1,-1,
ENSDART00000152334.2	chr1	-	26573434	26575260	26575260	26575260	7	26573434,26573610,26573915,26574345,26574510,26574711,26575200,	26573520,26573790,26574278,26574396,26574593,26574938,26575260,	0	ENSDARG00000053731.6	none	none	-1,-1,-1,-1,-1,-1,-1,
ENSDART00000152138.3	chr1	+	26577287	26584593	26584593	26584593	11	26577287,26578854,26579388,26579763,26580172,26580370,26582136,26582601,26582981,26583280,26583768,	26577474,26579206,26579633,26579973,26580270,26580421,26582518,26582778,26583111,26583444,26584593,	0	ENSDARG00000094127.4	none	none	-1,-1,-1,-1,-1,-1,-1,-1,-1,-1,-1,
ENSDART00000011645.11	chr1	+	26605064	26654311	26605257	26653252	12	26605064,26626832,26635832,26637982,26640876,26643959,26645556,26645768,26649075,26649306,26650972,26653120,	26605272,26627033,26635949,26638132,26641056,26644076,26645661,26645865,26649188,26649397,26651256,26654311,	0	ENSDARG00000005210.12	cmpl	cmpl	0,0,0,0,0,0,0,0,1,0,1,0,
ENSDART00000152169.2	chr1	+	26605213	26627687	26627687	26627687	2	26605213,26626832,	26605272,26627687,	0	ENSDARG00000005210.12	none	none	-1,-1,
ENSDART00000182040.1	chr1	+	26622213	26653252	26622213	26653252	12	26622213,26626832,26635832,26637982,26640876,26643959,26645556,26645768,26649075,26649306,26650972,26653120,	26622483,26627033,26635949,26638132,26641056,26644076,26645661,26645865,26649188,26649397,26651256,26653252,	0	ENSDARG00000005210.12	cmpl	cmpl	0,0,0,0,0,0,0,0,1,0,1,0,
ENSDART00000152643.2	chr1	+	26622248	26640898	26622248	26640898	5	26622248,26626832,26635832,26637982,26640876,	26622483,26627033,26635949,26638132,26640898,	0	ENSDARG00000005210.12	incmpl	incmpl	2,0,0,0,0,
ENSDART00000158193.2	chr1	+	26626823	26654309	26626832	26653252	11	26626823,26635832,26637982,26640876,26643959,26645556,26645768,26649075,26649306,26650972,26653120,	26627033,26635949,26638132,26641056,26644076,26645661,26645865,26649188,26649397,26651256,26654309,	0	ENSDARG00000005210.12	cmpl	cmpl	0,0,0,0,0,0,0,1,0,1,0,
ENSDART00000152306.2	chr1	+	26649026	26651227	26651227	26651227	3	26649026,26649306,26650972,	26649188,26649397,26651227,	0	ENSDARG00000005210.12	none	none	-1,-1,-1,
ENSDART00000102500.5	chr1	-	26660368	26664840	26660907	26664688	7	26660368,26661067,26661213,26661403,26662476,26662686,26664634,	26660990,26661137,26661326,26661590,26662599,26662836,26664840,	0	ENSDARG00000023330.10	cmpl	cmpl	1,0,1,0,0,0,0,
ENSDART00000152401.3	chr1	-	26661432	26664653	26664653	26664653	4	26661432,26662476,26662686,26664543,	26661590,26662599,26662836,26664653,	0	ENSDARG00000023330.10	none	none	-1,-1,-1,-1,
ENSDART00000152141.2	chr1	-	26662476	26663423	26663423	26663423	2	26662476,26662686,	26662599,26663423,	0	ENSDARG00000023330.10	none	none	-1,-1,
ENSDART00000152803.4	chr1	+	26667871	26671210	26668094	26669746	5	26667871,26668085,26668959,26669206,26669621,	26667984,26668152,26669038,26669529,26671210,	0	ENSDARG00000096667.4	cmpl	cmpl	-1,0,1,2,1,
ENSDART00000152144.3	chr1	+	26667888	26669774	26668094	26669746	5	26667888,26668085,26668959,26669206,26669621,	26667984,26668152,26669050,26669529,26669774,	0	ENSDARG00000096667.4	cmpl	cmpl	-1,0,1,2,1,
ENSDART00000152785.3	chr1	+	26667974	26669819	26668094	26669746	4	26667974,26668959,26669206,26669621,	26668152,26669038,26669529,26669819,	0	ENSDARG00000096667.4	cmpl	cmpl	0,1,2,1,
ENSDART00000152393.2	chr1	+	26667999	26669900	26668094	26669746	4	26667999,26668959,26669206,26669621,	26668152,26669050,26669529,26669900,	0	ENSDARG00000096667.4	cmpl	cmpl	0,1,2,1,
ENSDART00000152617.2	chr1	+	26668025	26669885	26669885	26669885	3	26668025,26668959,26669621,	26668152,26669529,26669885,	0	ENSDARG00000096667.4	none	none	-1,-1,-1,
ENSDART00000152492.3	chr1	-	26670827	26676391	26670973	26676250	6	26670827,26671859,26673329,26674728,26675938,26676161,	26671206,26672408,26673487,26674903,26676093,26676391,	0	ENSDARG00000037245.7	cmpl	cmpl	1,1,2,1,2,0,
ENSDART00000054184.6	chr1	-	26670846	26675969	26670973	26673456	5	26670846,26671859,26673329,26674728,26675848,	26671206,26672408,26673487,26674903,26675969,	0	ENSDARG00000037245.7	cmpl	cmpl	1,1,0,-1,-1,
ENSDART00000152299.2	chr1	+	26676757	26700439	26677421	26700179	26	26676757,26677405,26677541,26679636,26681696,26682437,26682640,26682830,26683046,26683814,26684012,26685425,26685595,26687156,26687314,26687587,26687818,26692950,26693427,26696467,26698151,26698387,26699092,26699590,26699928,26700107,	26676873,26677448,26677658,26681621,26681886,26682554,26682733,26682944,26683166,26683907,26684147,26685519,26685743,26687207,26687489,26687721,26687987,26693074,26693514,26696594,26698284,26698468,26699242,26699665,26700009,26700439,	0	ENSDARG00000096554.2	cmpl	cmpl	-1,0,0,0,2,0,0,0,0,0,0,0,1,2,2,0,2,0,1,1,2,0,0,0,0,0,
ENSDART00000183427.1	chr1	+	26677405	26700179	26677592	26700179	24	26677405,26679636,26681696,26682437,26682640,26682830,26683046,26683814,26684012,26685425,26685595,26687156,26687314,26687587,26687818,26692950,26693427,26696467,26698151,26698387,26699092,26699590,26699928,26700107,	26677658,26681621,26681886,26682554,26682733,26682944,26683166,26683907,26684147,26685519,26685743,26687207,26687489,26687721,26687987,26693074,26693514,26696594,26698284,26698468,26699242,26699665,26700009,26700179,	0	ENSDARG00000096554.2	cmpl	cmpl	0,0,2,0,0,0,0,0,0,0,1,2,2,0,2,0,1,1,2,0,0,0,0,0,
ENSDART00000181997.1	chr1	+	26677405	26700210	26677421	26700210	24	26677405,26677541,26679636,26681696,26682437,26682640,26682830,26683046,26683814,26684012,26685425,26685595,26687156,26687314,26687587,26687818,26692950,26693427,26696467,26698151,26698387,26699092,26699590,26699928,	26677448,26677658,26681621,26681886,26682554,26682733,26682944,26683166,26683907,26684147,26685519,26685743,26687207,26687489,26687721,26687987,26693074,26693514,26696594,26698284,26698468,26699242,26699665,26700210,	0	ENSDARG00000096554.2	cmpl	cmpl	0,0,0,2,0,0,0,0,0,0,0,1,2,2,0,2,0,1,1,2,0,0,0,0,
ENSDART00000180366.1	chr1	+	26677405	26700210	26677592	26700210	23	26677405,26679636,26681696,26682437,26682640,26682830,26683046,26683814,26684012,26685425,26685595,26687156,26687314,26687587,26687818,26692950,26693427,26696467,26698151,26698387,26699092,26699590,26699928,	26677658,26681621,26681886,26682554,26682733,26682944,26683166,26683907,26684147,26685519,26685743,26687207,26687489,26687721,26687987,26693074,26693514,26696594,26698284,26698468,26699242,26699665,26700210,	0	ENSDARG00000096554.2	cmpl	cmpl	0,0,2,0,0,0,0,0,0,0,1,2,2,0,2,0,1,1,2,0,0,0,0,
ENSDART00000152389.2	chr1	-	26701609	26702992	26701865	26702992	1	26701609,	26702992,	0	ENSDARG00000079266.3	cmpl	incmpl	1,
ENSDART00000109297.2	chr1	-	26701865	26702930	26701865	26702930	2	26701865,26702172,	26702154,26702930,	0	ENSDARG00000079266.3	cmpl	cmpl	2,0,
ENSDART00000090611.6	chr1	-	26740717	26782573	26741346	26782411	9	26740717,26741670,26748025,26748977,26751011,26752246,26752486,26761891,26782366,	26741543,26741789,26748129,26749136,26751145,26752390,26752559,26761960,26782573,	0	ENSDARG00000023600.7	cmpl	cmpl	1,2,0,0,1,1,0,0,0,
ENSDART00000152406.2	chr1	-	26741743	26782518	26748124	26782411	9	26741743,26748025,26748593,26748977,26751011,26752246,26752486,26761891,26782366,	26741789,26748129,26748639,26749136,26751145,26752390,26752559,26761960,26782518,	0	ENSDARG00000023600.7	cmpl	cmpl	-1,1,0,0,1,1,0,0,0,
ENSDART00000189111.1	chr1	-	26821962	27014935	26824375	27014108	25	26821962,26836604,26837068,26842963,26843964,26844330,26846766,26850920,26869894,26876136,26880256,26881311,26884408,26891623,26916481,26934964,26991789,26992098,26994224,26999902,27000692,27007684,27010816,27014027,27014803,	26824453,26836679,26837239,26843149,26844102,26844457,26846864,26851082,26870112,26876212,26880332,26881742,26884506,26891709,26916577,26935086,26991954,26992261,26994358,27000052,27000827,27007769,27010905,27014115,27014935,	0	ENSDARG00000033345.9	cmpl	cmpl	0,0,0,0,0,2,0,0,1,0,2,0,1,2,2,0,0,2,0,0,0,2,0,0,-1,
ENSDART00000192087.1	chr1	-	26821962	27014935	26824375	27014108	26	26821962,26836604,26837068,26842963,26843964,26844330,26846766,26850920,26869894,26876136,26880256,26881311,26884408,26891623,26916481,26934964,26953887,26991789,26992098,26994224,26999902,27000692,27007684,27010816,27014027,27014803,	26824453,26836679,26837239,26843149,26844102,26844457,26846864,26851082,26870112,26876212,26880332,26881742,26884506,26891709,26916577,26935086,26953977,26991954,26992261,26994358,27000052,27000827,27007769,27010905,27014115,27014935,	0	ENSDARG00000033345.9	cmpl	cmpl	0,0,0,0,0,2,0,0,1,0,2,0,1,2,2,0,0,0,2,0,0,0,2,0,0,-1,
ENSDART00000187248.1	chr1	-	26826387	27014935	26827608	27014108	26	26826387,26836604,26837068,26842963,26843964,26844330,26846766,26850920,26869894,26876136,26880256,26881311,26884408,26891623,26916481,26934964,26953887,26991789,26992098,26994224,26999902,27000692,27007684,27010816,27014027,27014665,	26827719,26836679,26837239,26843149,26844102,26844457,26846864,26851082,26870112,26876212,26880332,26881742,26884506,26891709,26916577,26935086,26953977,26991954,26992261,26994358,27000052,27000827,27007769,27010905,27014115,27014935,	0	ENSDARG00000033345.9	cmpl	cmpl	0,0,0,0,0,2,0,0,1,0,2,0,1,2,2,0,0,0,2,0,0,0,2,0,0,-1,
ENSDART00000187348.1	chr1	-	26826387	27014935	26827608	27014108	25	26826387,26836604,26837068,26842963,26843964,26844330,26846766,26850920,26869894,26876136,26880256,26881311,26884408,26891623,26934964,26953887,26991789,26992098,26994224,26999902,27000692,27007684,27010816,27014027,27014665,	26827719,26836679,26837239,26843149,26844102,26844457,26846864,26851082,26870112,26876212,26880332,26881742,26884506,26891709,26935086,26953977,26991954,26992261,26994358,27000052,27000827,27007769,27010905,27014115,27014935,	0	ENSDARG00000033345.9	cmpl	cmpl	0,0,0,0,0,2,0,0,1,0,2,0,1,2,0,0,0,2,0,0,0,2,0,0,-1,
ENSDART00000147414.4	chr1	-	26827008	27014872	26827608	27014108	26	26827008,26836604,26837068,26842963,26843964,26844330,26846766,26850920,26869894,26876136,26880256,26881311,26884408,26891623,26916481,26934964,26953887,26991789,26992098,26994224,26999902,27000692,27007684,27010816,27014027,27014803,	26827719,26836679,26837239,26843149,26844102,26844457,26846864,26851082,26870112,26876212,26880332,26881742,26884506,26891709,26916577,26935086,26953977,26991954,26992261,26994358,27000052,27000827,27007769,27010905,27014115,27014872,	0	ENSDARG00000033345.9	cmpl	cmpl	0,0,0,0,0,2,0,0,1,0,2,0,1,2,2,0,0,0,2,0,0,0,2,0,0,-1,
ENSDART00000147727.2	chr1	-	26994110	27000838	27000838	27000838	3	26994110,26999902,27000692,	26994358,27000052,27000838,	0	ENSDARG00000033345.9	none	none	-1,-1,-1,
ENSDART00000134032.2	chr1	-	27007748	27014888	27007748	27014108	4	27007748,27010816,27014027,27014665,	27007769,27010905,27014115,27014888,	0	ENSDARG00000033345.9	incmpl	cmpl	2,0,0,-1,
ENSDART00000189093.1	chr1	+	27023686	27212459	27024412	27208422	6	27023686,27113560,27159663,27169400,27195850,27207656,	27024415,27113815,27159766,27169636,27198159,27212459,	0	ENSDARG00000069989.8	cmpl	cmpl	0,0,0,1,0,2,
ENSDART00000102322.6	chr1	+	27024067	27209089	27024412	27206423	7	27024067,27113560,27159663,27169400,27195850,27206392,27207656,	27024415,27113815,27159766,27169636,27198159,27206466,27209089,	0	ENSDARG00000069989.8	cmpl	cmpl	0,0,0,1,0,2,-1,
ENSDART00000184065.1	chr1	+	27052529	27212459	27053102	27208422	5	27052529,27159663,27169400,27195850,27207656,	27053240,27159766,27169636,27198159,27212459,	0	ENSDARG00000069989.8	cmpl	cmpl	0,0,1,0,2,
ENSDART00000161169.2	chr1	+	27053009	27209699	27053102	27208422	6	27053009,27113560,27159663,27169400,27195850,27207656,	27053240,27113815,27159766,27169636,27198159,27209699,	0	ENSDARG00000069989.8	cmpl	cmpl	0,0,0,1,0,2,
ENSDART00000186790.1	chr1	+	27070759	27212459	27113713	27208422	6	27070759,27113560,27159663,27169400,27195850,27207656,	27070816,27113815,27159766,27169636,27198159,27212459,	0	ENSDARG00000069989.8	cmpl	cmpl	-1,0,0,1,0,2,
ENSDART00000128671.4	chr1	+	27112478	27209089	27113713	27208422	6	27112478,27113560,27159663,27169400,27195850,27207656,	27112763,27113815,27159766,27169636,27198159,27209089,	0	ENSDARG00000069989.8	cmpl	cmpl	-1,0,0,1,0,2,
ENSDART00000180184.1	chr1	+	27153858	27212459	27153858	27208422	5	27153858,27159663,27169400,27195850,27207656,	27153870,27159766,27169636,27198159,27212459,	0	ENSDARG00000069989.8	cmpl	cmpl	0,0,1,0,2,
ENSDART00000135759.2	chr1	-	27530824	27542119	27531418	27542118	6	27530824,27531415,27535654,27535881,27541619,27542063,	27531305,27531603,27535762,27535929,27541697,27542119,	0	ENSDARG00000095189.2	cmpl	cmpl	-1,1,1,1,1,0,
ENSDART00000172192.2	chr1	+	27713348	27730980	27714939	27729804	6	27713348,27714932,27716120,27717033,27729652,27730938,	27713393,27715017,27716255,27717199,27729928,27730980,	0	ENSDARG00000104096.2	cmpl	cmpl	-1,0,0,0,1,-1,
ENSDART00000169584.2	chr1	+	27713379	27733179	27713379	27732846	8	27713379,27714922,27716120,27717033,27730938,27731885,27732242,27732796,	27713393,27715017,27716255,27717199,27731003,27731953,27732286,27733179,	0	ENSDARG00000104096.2	incmpl	cmpl	2,1,0,0,1,0,2,1,
ENSDART00000165515.2	chr1	-	27738646	27743985	27738980	27742713	10	27738646,27739215,27740249,27740537,27741508,27741852,27742032,27742329,27742658,27743905,	27739090,27739395,27740435,27740636,27741626,27741944,27742150,27742541,27742789,27743985,	0	ENSDARG00000102639.2	cmpl	cmpl	1,1,1,1,0,1,0,1,0,-1,
ENSDART00000102335.5	chr1	+	27808915	27861144	27809042	27860726	9	27808915,27825991,27826381,27826593,27827060,27842281,27857738,27859067,27860513,	27809396,27826293,27826477,27826790,27827145,27842387,27857796,27859195,27861144,	0	ENSDARG00000006621.11	cmpl	cmpl	0,0,2,2,1,2,0,1,0,
ENSDART00000160524.2	chr1	+	27825979	27861148	27825979	27860726	8	27825979,27826381,27826593,27827060,27842281,27857738,27859067,27860513,	27826293,27826477,27826790,27827145,27842387,27857796,27859195,27861148,	0	ENSDARG00000006621.11	incmpl	cmpl	0,2,2,1,2,0,1,0,
ENSDART00000102337.4	chr1	+	27867705	27894817	27868329	27893213	8	27867705,27876627,27877480,27877731,27884817,27887420,27892811,27893088,	27868462,27876808,27877626,27877920,27884903,27887530,27892984,27894817,	0	ENSDARG00000069996.5	cmpl	cmpl	0,1,2,1,1,0,2,1,
ENSDART00000165332.2	chr1	+	27868293	27894021	27868293	27893213	8	27868293,27876627,27877487,27877731,27884817,27887420,27892811,27893088,	27868462,27876812,27877626,27877920,27884903,27887530,27892984,27894021,	0	ENSDARG00000069996.5	incmpl	cmpl	0,1,0,1,1,0,2,1,
ENSDART00000180692.1	chr1	+	27977296	28020042	27977566	28018748	12	27977296,27979988,27984815,27993184,27994791,27994938,27995394,27995517,28001796,28006103,28016587,28018646,	27977653,27980079,27984885,27993255,27994845,27994967,27995414,27995614,28001904,28006194,28016760,28020042,	0	ENSDARG00000100083.2	cmpl	cmpl	0,0,1,2,1,1,0,2,0,0,1,0,
ENSDART00000166819.2	chr1	+	27977330	28019225	27977464	28018748	13	27977330,27977604,27979988,27984815,27993184,27994791,27994938,27995394,27995517,28001796,28006103,28016587,28018646,	27977478,27977653,27980079,27984885,27993255,27994845,27994967,27995414,27995614,28001904,28006194,28016760,28019225,	0	ENSDARG00000100083.2	cmpl	cmpl	0,2,0,1,2,1,1,0,2,0,0,1,0,
ENSDART00000164984.2	chr1	+	27977369	28001937	27977464	27984863	9	27977369,27977604,27984815,27993184,27994791,27994938,27995394,27995517,28001796,	27977478,27977653,27984885,27993255,27994845,27994967,27995414,27995614,28001937,	0	ENSDARG00000100083.2	cmpl	cmpl	0,2,0,-1,-1,-1,-1,-1,-1,
ENSDART00000162589.2	chr1	+	27977388	27995053	27995053	27995053	6	27977388,27977604,27979988,27984815,27993184,27994791,	27977478,27977653,27980079,27984885,27993255,27995053,	0	ENSDARG00000100083.2	none	none	-1,-1,-1,-1,-1,-1,
ENSDART00000171868.2	chr1	+	27984392	27995611	27995611	27995611	7	27984392,27984815,27993184,27994791,27994938,27995394,27995517,	27984722,27984885,27993255,27994845,27994967,27995414,27995611,	0	ENSDARG00000100083.2	none	none	-1,-1,-1,-1,-1,-1,-1,
ENSDART00000047211.8	chr1	+	28031696	28046806	28035498	28046356	6	28031696,28035470,28035781,28035999,28036400,28045806,	28031918,28035598,28035888,28036234,28036506,28046806,	0	ENSDARG00000031632.9	cmpl	cmpl	-1,0,1,0,1,2,
ENSDART00000133844.3	chr1	+	28031696	28036148	28036148	28036148	3	28031696,28035470,28035999,	28031918,28035888,28036148,	0	ENSDARG00000031632.9	none	none	-1,-1,-1,
ENSDART00000149420.2	chr1	+	28031707	28036148	28036148	28036148	3	28031707,28035470,28035999,	28031893,28035888,28036148,	0	ENSDARG00000031632.9	none	none	-1,-1,-1,
ENSDART00000149785.3	chr1	+	28031707	28045997	28035498	28045997	6	28031707,28035470,28035781,28035999,28036400,28045806,	28031754,28035598,28035888,28036234,28036506,28045997,	0	ENSDARG00000031632.9	cmpl	incmpl	-1,0,1,0,1,2,
ENSDART00000149817.3	chr1	+	28031752	28036214	28035498	28036214	4	28031752,28035470,28035781,28035999,	28031893,28035595,28035888,28036214,	0	ENSDARG00000031632.9	cmpl	incmpl	-1,0,1,0,
ENSDART00000149479.2	chr1	+	28031753	28036471	28035498	28036471	5	28031753,28035470,28035781,28035999,28036400,	28031918,28035595,28035888,28036234,28036471,	0	ENSDARG00000031632.9	cmpl	incmpl	-1,0,1,0,1,
ENSDART00000187922.1	chr1	+	28031891	28047242	28031891	28046356	6	28031891,28035470,28035781,28035999,28036400,28045806,	28031893,28035598,28035888,28036234,28036506,28047242,	0	ENSDARG00000031632.9	cmpl	cmpl	0,2,1,0,1,2,
ENSDART00000167875.2	chr1	-	28067770	28089650	28067982	28089619	9	28067770,28071382,28071645,28080330,28081263,28088832,28089018,28089189,28089350,	28068130,28071490,28071804,28080413,28081413,28088937,28089100,28089261,28089650,	0	ENSDARG00000101474.2	cmpl	cmpl	2,2,2,0,0,0,2,2,0,
ENSDART00000161024.2	chr1	-	28080330	28089557	28080330	28089557	6	28080330,28081263,28088832,28089018,28089189,28089350,	28080413,28081365,28088937,28089100,28089261,28089557,	0	ENSDARG00000101474.2	incmpl	incmpl	0,0,0,2,2,2,
ENSDART00000170779.2	chr1	-	28088147	28089546	28089546	28089546	5	28088147,28088854,28089018,28089189,28089350,	28088260,28088937,28089100,28089261,28089546,	0	ENSDARG00000101474.2	none	none	-1,-1,-1,-1,-1,
ENSDART00000166989.2	chr1	+	28089702	28195267	28145180	28195009	15	28089702,28145161,28160881,28161102,28163311,28163530,28176962,28177121,28177299,28191344,28191521,28191725,28191955,28194798,28194978,	28089761,28145252,28160958,28161241,28163395,28163626,28177025,28177200,28177393,28191394,28191580,28191827,28192154,28194895,28195267,	0	ENSDARG00000104710.3	cmpl	cmpl	-1,0,0,2,0,0,0,0,1,2,1,0,0,1,2,
ENSDART00000149075.2	chr1	-	28308615	28309012	28309012	28309012	2	28308615,28308854,	28308663,28309012,	0	ENSDARG00000095954.2	none	none	-1,-1,
ENSDART00000149632.2	chr1	-	28348957	28364598	28364598	28364598	2	28348957,28364501,	28349569,28364598,	0	ENSDARG00000095895.2	none	none	-1,-1,
ENSDART00000148175.4	chr1	-	28391630	28473487	28392070	28473350	11	28391630,28392414,28393617,28404956,28422460,28427702,28427888,28428145,28428542,28444764,28473275,	28392229,28392564,28393780,28405115,28422582,28427817,28427976,28428308,28428692,28444887,28473487,	0	ENSDARG00000089138.5	cmpl	cmpl	0,0,2,2,0,2,1,0,0,0,0,
ENSDART00000190608.1	chr1	-	28392070	28473350	28392070	28473350	10	28392070,28392414,28393617,28422460,28427702,28427888,28428145,28428542,28444764,28473275,	28392229,28392564,28393780,28422582,28427817,28427976,28428308,28428692,28444887,28473350,	0	ENSDARG00000089138.5	cmpl	cmpl	0,0,2,0,2,1,0,0,0,0,
ENSDART00000191210.1	chr1	-	28594808	28607353	28598701	28606563	2	28594808,28605735,	28599046,28607353,	0	ENSDARG00000112052.1	cmpl	cmpl	0,0,
ENSDART00000121758.3	chr1	-	28624185	28629471	28624278	28629356	7	28624185,28626996,28627258,28627568,28627891,28628182,28628927,	28624419,28627105,28627392,28627718,28628096,28628295,28629471,	0	ENSDARG00000089334.3	cmpl	cmpl	0,2,0,0,2,0,0,
ENSDART00000152694.2	chr1	-	28708240	28709951	28709951	28709951	1	28708240,	28709951,	0	ENSDARG00000078963.4	none	none	-1,
ENSDART00000148522.3	chr1	-	28723816	28749604	28724428	28749604	4	28723816,28724941,28725515,28749492,	28724445,28725028,28725602,28749604,	0	ENSDARG00000053456.7	cmpl	incmpl	1,1,1,0,
ENSDART00000148536.2	chr1	-	28724040	28831848	28724428	28831775	19	28724040,28725515,28749492,28749769,28750025,28750273,28750476,28751146,28751307,28752952,28753190,28772012,28787841,28788229,28806530,28808500,28808671,28809070,28831682,	28724445,28725602,28749636,28749890,28750110,28750370,28750555,28751227,28751350,28753020,28753226,28772079,28787951,28788367,28806610,28808578,28808778,28809144,28831848,	0	ENSDARG00000053456.7	cmpl	cmpl	1,1,1,0,2,1,0,0,2,0,0,2,0,0,1,1,2,0,0,
ENSDART00000148674.3	chr1	-	28749575	28759469	28759469	28759469	10	28749575,28749769,28750025,28750273,28750476,28751146,28751307,28752952,28753190,28759388,	28749636,28749890,28750110,28750370,28750555,28751227,28751350,28753020,28753226,28759469,	0	ENSDARG00000053456.7	none	none	-1,-1,-1,-1,-1,-1,-1,-1,-1,-1,
ENSDART00000150127.2	chr1	-	28752896	28808573	28808573	28808573	7	28752896,28753190,28772012,28787841,28788229,28806530,28808500,	28753020,28753226,28772079,28787951,28788367,28806610,28808573,	0	ENSDARG00000053456.7	none	none	-1,-1,-1,-1,-1,-1,-1,
ENSDART00000177588.2	chr1	-	28832670	28860732	28835630	28860725	7	28832670,28835866,28847656,28847883,28856127,28856352,28860504,	28835778,28835977,28847735,28847951,28856216,28856515,28860732,	0	ENSDARG00000053466.6	cmpl	cmpl	2,2,1,2,0,2,0,
ENSDART00000075502.5	chr1	-	28835503	28861226	28835630	28860725	8	28835503,28835866,28847656,28847883,28856127,28856352,28860504,28861086,	28835778,28835977,28847735,28847951,28856216,28856515,28860732,28861226,	0	ENSDARG00000053466.6	cmpl	cmpl	2,2,1,2,0,2,0,-1,
ENSDART00000152589.2	chr1	-	28835858	28861136	28861136	28861136	7	28835858,28847656,28847883,28856127,28856352,28860504,28861086,	28835977,28847735,28847951,28856216,28856515,28860712,28861136,	0	ENSDARG00000053466.6	none	none	-1,-1,-1,-1,-1,-1,-1,
ENSDART00000152182.3	chr1	-	28874388	28885919	28874746	28885919	6	28874388,28884841,28885121,28885390,28885675,28885857,	28874903,28884898,28885289,28885449,28885775,28885919,	0	ENSDARG00000053463.7	cmpl	incmpl	2,2,2,0,2,0,
ENSDART00000075500.6	chr1	-	28874398	28890028	28874746	28889868	11	28874398,28884841,28885121,28885390,28885675,28885857,28886072,28888146,28889094,28889327,28889792,	28874903,28884898,28885289,28885449,28885775,28885917,28886194,28888282,28889238,28889418,28890028,	0	ENSDARG00000053463.7	cmpl	cmpl	2,2,2,0,2,2,0,2,2,1,0,
ENSDART00000110270.4	chr1	-	28898944	28950366	28899479	28950280	21	28898944,28899827,28900269,28900521,28900925,28901129,28912293,28913590,28913875,28923205,28923636,28924135,28924352,28926599,28929530,28939896,28943533,28943774,28949767,28949978,28950262,	28899672,28899902,28900420,28900740,28900991,28901238,28912441,28913771,28914026,28923353,28923785,28924272,28924423,28926743,28929796,28940032,28943677,28943874,28949862,28950091,28950366,	0	ENSDARG00000037109.8	cmpl	cmpl	2,2,1,1,1,0,2,1,0,2,0,1,2,2,0,2,2,1,2,0,0,
ENSDART00000152730.2	chr1	+	28903769	28904635	28904635	28904635	2	28903769,28904458,	28903922,28904635,	0	ENSDARG00000096538.2	none	none	-1,-1,
ENSDART00000143863.2	chr1	-	28913588	28923849	28923849	28923849	4	28913588,28913875,28923205,28923636,	28913771,28914026,28923353,28923849,	0	ENSDARG00000037109.8	none	none	-1,-1,-1,-1,
ENSDART00000019770.8	chr1	-	28961652	29045426	28962830	29045166	7	28961652,28963952,28964635,28964937,28979076,28986420,29045102,	28962983,28964018,28964709,28965106,28979233,28986607,29045426,	0	ENSDARG00000005739.9	cmpl	cmpl	0,0,1,0,2,1,0,
ENSDART00000053933.7	chr1	-	29058267	29061285	29058835	29061046	3	29058267,29060496,29061043,	29059092,29060890,29061285,	0	ENSDARG00000053496.8	cmpl	cmpl	1,0,0,
ENSDART00000148331.2	chr1	-	29058271	29061327	29061327	29061327	2	29058271,29061253,	29059092,29061327,	0	ENSDARG00000053496.8	none	none	-1,-1,
ENSDART00000192615.1	chr1	-	29058271	29061291	29058835	29061046	4	29058271,29060496,29061043,29061146,	29059092,29060890,29061109,29061291,	0	ENSDARG00000053496.8	cmpl	cmpl	1,0,0,-1,
ENSDART00000142350.2	chr1	-	29058689	29061287	29058835	29061046	4	29058689,29060496,29061043,29061253,	29059092,29060890,29061125,29061287,	0	ENSDARG00000053496.8	cmpl	cmpl	1,0,0,-1,
ENSDART00000141522.2	chr1	+	29068648	29071356	29071356	29071356	2	29068648,29070662,	29068684,29071356,	0	ENSDARG00000053500.7	none	none	-1,-1,
ENSDART00000053932.6	chr1	+	29068653	29093562	29070679	29092481	15	29068653,29070662,29077597,29077964,29079757,29079901,29080244,29080517,29081021,29084478,29087169,29087733,29088057,29088252,29092350,	29068684,29070921,29077704,29078099,29079837,29080106,29080336,29080643,29081106,29084584,29087247,29087868,29088166,29088337,29093562,	0	ENSDARG00000053500.7	cmpl	cmpl	-1,0,2,1,1,0,1,0,0,1,2,2,2,0,1,
ENSDART00000126746.3	chr1	+	29068661	29080336	29070679	29077977	6	29068661,29070662,29077964,29079757,29079901,29080244,	29068684,29070921,29078099,29079837,29080106,29080336,	0	ENSDARG00000053500.7	cmpl	cmpl	-1,0,2,-1,-1,-1,
ENSDART00000192015.1	chr1	+	29070660	29092999	29070679	29092481	14	29070660,29077597,29077964,29079757,29079901,29080244,29080517,29081021,29084478,29087169,29087733,29088057,29088252,29092350,	29070921,29077704,29078099,29079837,29080106,29080336,29080643,29081106,29084584,29087247,29087868,29088166,29088337,29092999,	0	ENSDARG00000053500.7	cmpl	cmpl	0,2,1,1,0,1,0,0,1,2,2,2,0,1,
ENSDART00000075539.6	chr1	+	29096880	29100923	29097011	29100159	3	29096880,29097648,29099952,	29097203,29097771,29100923,	0	ENSDARG00000053502.6	cmpl	cmpl	0,0,0,
ENSDART00000133246.3	chr1	-	29102010	29139183	29102326	29139150	9	29102010,29111265,29118296,29119133,29119360,29137285,29137744,29138538,29139102,	29102428,29111450,29118400,29119251,29119502,29137435,29137845,29138686,29139183,	0	ENSDARG00000035080.9	cmpl	cmpl	0,1,2,1,0,0,1,0,0,
ENSDART00000075546.5	chr1	-	29111197	29139141	29111208	29139141	8	29111197,29118296,29119133,29119360,29137285,29137744,29138538,29139102,	29111450,29118400,29119251,29119502,29137435,29137845,29138686,29139141,	0	ENSDARG00000035080.9	cmpl	incmpl	1,2,1,0,0,1,0,0,
ENSDART00000132877.2	chr1	-	29111260	29138575	29138575	29138575	4	29111260,29118296,29137285,29138538,	29111450,29118400,29137435,29138575,	0	ENSDARG00000035080.9	none	none	-1,-1,-1,-1,
ENSDART00000053926.8	chr1	+	29140883	29164911	29141142	29163842	6	29140883,29142344,29152273,29162477,29162793,29163459,	29141340,29142497,29152365,29162713,29162880,29164911,	0	ENSDARG00000037100.10	cmpl	cmpl	0,0,0,2,1,1,
ENSDART00000150133.2	chr1	+	29140980	29142498	29141142	29142498	2	29140980,29142344,	29141340,29142498,	0	ENSDARG00000037100.10	cmpl	incmpl	0,0,
ENSDART00000141441.2	chr1	+	29162477	29164350	29162477	29163842	3	29162477,29162793,29163459,	29162713,29162880,29164350,	0	ENSDARG00000037100.10	incmpl	cmpl	2,1,1,
ENSDART00000152275.2	chr1	-	29167320	29168495	29168495	29168495	3	29167320,29167776,29168418,	29167395,29167945,29168495,	0	ENSDARG00000096627.2	none	none	-1,-1,-1,
ENSDART00000152484.2	chr1	+	29174194	29180648	29180648	29180648	2	29174194,29180135,	29174307,29180648,	0	ENSDARG00000096648.2	none	none	-1,-1,
ENSDART00000144085.3	chr1	-	29174503	29175553	29175553	29175553	4	29174503,29174862,29175241,29175476,	29174765,29175002,29175330,29175553,	0	ENSDARG00000075193.4	none	none	-1,-1,-1,-1,
ENSDART00000111548.3	chr1	-	29174902	29175700	29175700	29175700	4	29174902,29175241,29175476,29175669,	29175002,29175330,29175562,29175700,	0	ENSDARG00000075193.4	none	none	-1,-1,-1,-1,
ENSDART00000187742.1	chr1	-	29175461	29185227	29185227	29185227	4	29175461,29183612,29184397,29185202,	29175552,29183635,29184405,29185227,	0	ENSDARG00000075193.4	none	none	-1,-1,-1,-1,
ENSDART00000114536.4	chr1	+	29178116	29179930	29178330	29179533	6	29178116,29178683,29178883,29179105,29179433,29179670,	29178490,29178780,29178959,29179194,29179573,29179930,	0	ENSDARG00000069804.7	cmpl	cmpl	0,1,2,0,2,-1,
ENSDART00000149219.3	chr1	+	29178144	29179934	29179934	29179934	4	29178144,29178683,29178883,29179670,	29178490,29178780,29179573,29179934,	0	ENSDARG00000069804.7	none	none	-1,-1,-1,-1,
ENSDART00000150004.2	chr1	+	29178221	29179934	29179934	29179934	5	29178221,29178683,29178883,29179105,29179670,	29178490,29178780,29178959,29179573,29179934,	0	ENSDARG00000069804.7	none	none	-1,-1,-1,-1,-1,
ENSDART00000186905.1	chr1	+	29178330	29179533	29178330	29179533	5	29178330,29178683,29178883,29179105,29179433,	29178490,29178780,29178959,29179194,29179533,	0	ENSDARG00000069804.7	cmpl	cmpl	0,1,2,0,2,
ENSDART00000113735.4	chr1	+	29183961	29202689	29184201	29202394	15	29183961,29184510,29184876,29185100,29185246,29185433,29185725,29190283,29191320,29191515,29191657,29195928,29196160,29201894,29202340,	29184431,29184561,29184994,29185172,29185352,29185514,29185855,29190417,29191388,29191582,29191796,29196052,29196256,29202125,29202689,	0	ENSDARG00000078546.6	cmpl	cmpl	0,2,2,0,0,1,1,2,1,0,1,2,0,0,0,
ENSDART00000137055.2	chr1	+	29183971	29185269	29185269	29185269	4	29183971,29184510,29184876,29185100,	29184431,29184561,29184994,29185269,	0	ENSDARG00000078546.6	none	none	-1,-1,-1,-1,
ENSDART00000053924.5	chr1	+	29211539	29228393	29211694	29227457	2	29211539,29227452,	29214788,29228393,	0	ENSDARG00000037099.6	cmpl	cmpl	0,1,
ENSDART00000085648.5	chr1	+	29267840	29271473	29268438	29271168	2	29267840,29268423,	29268052,29271473,	0	ENSDARG00000060620.5	cmpl	cmpl	-1,0,
ENSDART00000112106.4	chr1	+	29281763	29391034	29282293	29389866	3	29281763,29383527,29389579,	29282980,29383699,29391034,	0	ENSDARG00000075858.4	cmpl	cmpl	0,0,1,
ENSDART00000152716.2	chr1	+	29311526	29312559	29312559	29312559	2	29311526,29312280,	29312024,29312559,	0	ENSDARG00000096592.2	none	none	-1,-1,
ENSDART00000152176.2	chr1	-	29323373	29326948	29326948	29326948	2	29323373,29326481,	29323561,29326948,	0	ENSDARG00000096643.2	none	none	-1,-1,
ENSDART00000142382.2	chr1	+	29444451	29445719	29445719	29445719	3	29444451,29444593,29445406,	29444519,29444729,29445719,	0	ENSDARG00000093663.2	none	none	-1,-1,-1,
ENSDART00000152663.2	chr1	+	29451464	29452733	29452733	29452733	3	29451464,29451608,29452422,	29451534,29451744,29452733,	0	ENSDARG00000096555.2	none	none	-1,-1,-1,
ENSDART00000152343.2	chr1	+	29507646	29508473	29508473	29508473	2	29507646,29508366,	29508154,29508473,	0	ENSDARG00000096544.2	none	none	-1,-1,
ENSDART00000152226.2	chr1	+	29515159	29519002	29516192	29519002	4	29515159,29516156,29517268,29518186,	29515312,29516322,29517384,29519002,	0	ENSDARG00000069799.6	cmpl	cmpl	-1,0,1,0,
ENSDART00000109224.3	chr1	-	29608127	29653472	29608287	29653195	5	29608127,29610072,29618248,29635485,29653035,	29608823,29610200,29618510,29635734,29653472,	0	ENSDARG00000074117.4	cmpl	cmpl	1,2,1,1,0,
ENSDART00000132063.3	chr1	-	29653946	29658721	29654893	29658641	4	29653946,29655147,29655373,29658556,	29655034,29655263,29655709,29658721,	0	ENSDARG00000092653.3	cmpl	cmpl	0,1,1,0,
ENSDART00000088290.7	chr1	+	29664335	29743640	29715859	29742327	15	29664335,29687153,29715857,29716846,29718744,29728511,29731889,29732137,29734245,29735375,29736151,29737894,29738129,29738422,29739618,	29664558,29687213,29715979,29716949,29719304,29728589,29732049,29732259,29734311,29735519,29736262,29737993,29738250,29738565,29743640,	0	ENSDARG00000061732.9	cmpl	cmpl	-1,-1,0,0,1,0,0,1,0,0,0,0,0,1,0,
ENSDART00000154342.3	chr1	+	29738421	29743635	29738421	29742327	3	29738421,29739618,29740371,	29738565,29740296,29743635,	0	ENSDARG00000061732.9	incmpl	cmpl	0,0,0,
ENSDART00000136066.2	chr1	+	29741842	29743469	29741842	29742327	2	29741842,29743347,	29742334,29743469,	0	ENSDARG00000061732.9	incmpl	cmpl	1,-1,
ENSDART00000133225.2	chr1	-	29743441	29747702	29743816	29747645	6	29743441,29744035,29744566,29745103,29746521,29747587,	29743944,29744081,29744670,29745230,29746643,29747702,	0	ENSDARG00000095590.2	cmpl	cmpl	1,0,1,0,1,0,
ENSDART00000189670.1	chr1	-	29743447	29747702	29743816	29747645	6	29743447,29744035,29744566,29745107,29746521,29747587,	29743944,29744081,29744674,29745230,29746643,29747702,	0	ENSDARG00000095590.2	cmpl	cmpl	1,0,0,0,1,0,
ENSDART00000049514.6	chr1	-	29750936	29758947	29752234	29758902	5	29750936,29754451,29756930,29757979,29758855,	29752518,29755029,29757302,29758201,29758947,	0	ENSDARG00000031202.6	cmpl	cmpl	1,2,2,2,0,
ENSDART00000183571.1	chr1	-	29750954	29758947	29752234	29758902	5	29750954,29754451,29756930,29757979,29758855,	29752518,29755029,29757302,29758114,29758947,	0	ENSDARG00000031202.6	cmpl	cmpl	1,2,2,2,0,
ENSDART00000140345.3	chr1	-	29754787	29758947	29754787	29758902	4	29754787,29756930,29757979,29758855,	29755029,29757302,29758114,29758947,	0	ENSDARG00000031202.6	incmpl	cmpl	2,2,2,0,
ENSDART00000136760.2	chr1	-	29755021	29761086	29755021	29758185	4	29755021,29756930,29757979,29760998,	29755029,29757302,29758201,29761086,	0	ENSDARG00000031202.6	incmpl	cmpl	2,2,0,-1,
ENSDART00000101856.5	chr1	+	29759677	29764060	29759699	29763736	10	29759677,29760752,29761051,29761329,29761531,29761833,29762899,29763050,29763366,29763548,	29759776,29760828,29761176,29761438,29761633,29761897,29762938,29763253,29763451,29764060,	0	ENSDARG00000037144.8	cmpl	cmpl	0,2,0,2,0,0,1,1,0,1,
ENSDART00000054059.8	chr1	+	29759677	29764056	29759699	29763736	11	29759677,29760752,29761051,29761329,29761531,29761833,29762451,29762847,29763050,29763366,29763548,	29759776,29760828,29761176,29761438,29761633,29761941,29762562,29762938,29763253,29763451,29764056,	0	ENSDARG00000037144.8	cmpl	cmpl	0,2,0,2,0,0,0,0,1,0,1,
ENSDART00000054064.5	chr1	+	29766724	29797907	29769363	29797359	21	29766724,29769354,29770282,29770494,29770713,29771278,29771510,29772021,29772291,29772611,29775456,29779193,29781439,29783570,29786159,29786351,29789680,29792547,29795234,29795606,29797182,	29766853,29769501,29770392,29770609,29770825,29771406,29771555,29772200,29772492,29772764,29775818,29779649,29781646,29784060,29786269,29787590,29790229,29792691,29795435,29795770,29797907,	0	ENSDARG00000037177.6	cmpl	cmpl	-1,0,0,2,0,1,0,0,2,2,2,1,1,1,2,1,1,1,1,1,0,
ENSDART00000019743.6	chr1	+	29798139	29824375	29798278	29823440	17	29798139,29801103,29804624,29805218,29806462,29806668,29806939,29808562,29809206,29813237,29814826,29817082,29817315,29817708,29820529,29820744,29823372,	29798434,29801171,29804718,29805346,29806592,29806793,29807051,29808642,29809315,29813370,29814946,29817140,29817475,29817860,29820641,29820916,29824375,	0	ENSDARG00000003866.6	cmpl	cmpl	0,0,2,0,2,0,2,0,2,0,1,1,2,0,2,0,1,
ENSDART00000135873.2	chr1	+	29806493	29809496	29809496	29809496	5	29806493,29806668,29806939,29808562,29809206,	29806592,29806793,29807051,29808642,29809496,	0	ENSDARG00000003866.6	none	none	-1,-1,-1,-1,-1,
ENSDART00000142184.2	chr1	+	29831758	29860373	29860373	29860373	4	29831758,29857801,29859738,29860021,	29831864,29857872,29859902,29860373,	0	ENSDARG00000037178.6	none	none	-1,-1,-1,-1,
ENSDART00000054066.5	chr1	+	29858031	29860895	29858310	29860210	3	29858031,29859738,29860021,	29859241,29859902,29860895,	0	ENSDARG00000037178.6	cmpl	cmpl	0,1,0,
ENSDART00000133905.3	chr1	+	29862073	29953746	29862073	29952901	23	29862073,29864188,29868688,29868943,29872626,29873153,29891844,29896579,29896710,29899601,29900632,29900873,29906445,29907974,29909448,29909592,29909747,29913648,29916115,29924201,29939963,29945718,29952832,	29862162,29864260,29868736,29869012,29872740,29873207,29891976,29896616,29896789,29899704,29900727,29901024,29906589,29908049,29909517,29909668,29909961,29913751,29916214,29924255,29940104,29945796,29953746,	0	ENSDARG00000028982.10	incmpl	cmpl	1,0,0,0,0,0,0,0,1,2,0,2,0,0,0,0,1,2,0,0,0,0,0,
ENSDART00000136786.3	chr1	+	29862081	29876024	29862081	29876024	7	29862081,29864188,29868688,29868943,29872626,29873153,29875984,	29862162,29864260,29868736,29869012,29872740,29873207,29876024,	0	ENSDARG00000028982.10	incmpl	incmpl	0,0,0,0,0,0,0,
ENSDART00000135252.2	chr1	+	29862132	29876644	29862132	29876644	7	29862132,29864188,29868688,29868943,29872626,29873153,29876575,	29862162,29864260,29868736,29869012,29872740,29873207,29876644,	0	ENSDARG00000028982.10	incmpl	incmpl	0,0,0,0,0,0,0,
ENSDART00000086935.7	chr1	-	29954689	30039331	29954795	30039115	4	29954689,29990771,29997564,30038659,	29955256,29990964,29997720,30039331,	0	ENSDARG00000055839.7	cmpl	cmpl	1,0,0,0,
ENSDART00000143800.2	chr1	-	29990771	30039332	29990771	30038944	4	29990771,29997564,30038659,30039220,	29990964,29997720,30038984,30039332,	0	ENSDARG00000055839.7	incmpl	cmpl	0,0,0,-1,
ENSDART00000143639.3	chr1	+	30083577	30310689	30083678	30310630	45	30083577,30084047,30085754,30085992,30087533,30087650,30089140,30089383,30089556,30092872,30095652,30100258,30103296,30103464,30108767,30118030,30118157,30118568,30128260,30132605,30160003,30160324,30162976,30166505,30166629,30175748,30176086,30178140,30178632,30178797,30180671,30180842,30183272,30186589,30200927,30204979,30212427,30212772,30218158,30239058,30250410,30255310,30270638,30282801,303…	30083750,30084116,30085885,30086089,30087566,30087705,30089265,30089470,30089624,30093026,30095712,30100366,30103377,30103635,30108842,30118066,30118248,30118615,30128350,30132652,30160226,30160414,30163028,30166548,30166702,30175868,30176158,30178260,30178689,30178880,30180756,30180941,30183362,30186636,30201078,30205069,30212610,30212854,30218241,30239139,30250580,30255479,30270692,30282882,303…	0	ENSDARG00000060477.8	cmpl	cmpl	0,0,0,2,0,0,1,0,0,2,0,0,0,0,0,0,0,1,0,0,2,0,0,1,2,0,0,0,0,0,2,0,0,0,2,0,0,0,1,0,0,2,0,0,0,
ENSDART00000101779.6	chr1	+	30083577	30310689	30083678	30310630	15	30083577,30084047,30085754,30085992,30087533,30087650,30089140,30089383,30218218,30239058,30250410,30255310,30270638,30282801,30310486,	30083750,30084116,30085885,30086089,30087566,30087705,30089265,30089447,30218241,30239139,30250580,30255479,30270692,30282882,30310689,	0	ENSDARG00000060477.8	cmpl	cmpl	0,0,0,2,0,0,1,0,1,0,0,2,0,0,0,
ENSDART00000134311.3	chr1	+	30100256	30310689	30100256	30270648	6	30100256,30103296,30103464,30108767,30270645,30310486,	30100366,30103377,30103635,30108842,30270692,30310689,	0	ENSDARG00000060477.8	incmpl	cmpl	1,0,0,0,0,-1,
ENSDART00000146783.2	chr1	+	30103296	30156998	30103296	30156876	9	30103296,30103464,30108767,30118030,30118157,30118568,30128260,30132605,30156806,	30103377,30103635,30108842,30118066,30118248,30118615,30128350,30132652,30156998,	0	ENSDARG00000060477.8	incmpl	cmpl	0,0,0,0,0,1,0,0,2,
ENSDART00000118020.2	chr1	+	30165952	30166065	30166065	30166065	1	30165952,	30166065,	0	ENSDARG00000082429.2	none	none	-1,
ENSDART00000189156.1	chr1	+	30227390	30227505	30227505	30227505	1	30227390,	30227505,	0	ENSDARG00000113839.1	none	none	-1,
ENSDART00000186085.1	chr1	-	30244530	30244645	30244645	30244645	1	30244530,	30244645,	0	ENSDARG00000110947.1	none	none	-1,
ENSDART00000152416.2	chr1	-	30333201	30334829	30334829	30334829	3	30333201,30333444,30334653,	30333408,30333640,30334829,	0	ENSDARG00000096572.2	none	none	-1,-1,-1,
ENSDART00000125759.3	chr1	-	30343713	30366824	30347393	30366550	2	30343713,30366375,	30348028,30366824,	0	ENSDARG00000091513.3	cmpl	cmpl	1,0,
ENSDART00000033024.7	chr1	+	30422142	30438036	30422261	30437054	5	30422142,30429485,30429761,30434533,30436824,	30422416,30429636,30429923,30434672,30438036,	0	ENSDARG00000026771.7	cmpl	cmpl	0,2,0,0,1,
ENSDART00000152252.2	chr1	-	30439421	30441060	30441060	30441060	1	30439421,	30441060,	0	ENSDARG00000096632.2	none	none	-1,
ENSDART00000164202.2	chr1	-	30443192	30473422	30443293	30456937	12	30443192,30444343,30445261,30445516,30449240,30450310,30452571,30453243,30453510,30455009,30456755,30473376,	30443392,30444457,30445393,30445591,30449357,30450376,30452703,30453379,30453633,30455144,30457062,30473422,	0	ENSDARG00000099758.3	cmpl	cmpl	0,0,0,0,0,0,0,2,2,2,0,-1,
ENSDART00000185318.1	chr1	-	30443194	30457062	30443293	30456937	11	30443194,30444343,30445261,30445516,30449240,30450310,30452571,30453243,30453510,30455009,30456755,	30443392,30444457,30445393,30445591,30449357,30450376,30452703,30453379,30453633,30455144,30457062,	0	ENSDARG00000099758.3	cmpl	cmpl	0,0,0,0,0,0,0,2,2,2,0,
ENSDART00000168189.2	chr1	-	30443238	30510839	30443293	30456937	13	30443238,30444343,30445261,30445516,30449240,30450310,30452571,30453243,30453510,30455009,30456755,30510083,30510651,	30443392,30444457,30445393,30445591,30449357,30450376,30452703,30453379,30453633,30455144,30457062,30510126,30510839,	0	ENSDARG00000099758.3	cmpl	cmpl	0,0,0,0,0,0,0,2,2,2,0,-1,-1,
ENSDART00000174868.2	chr1	-	30443293	30510957	30443293	30456937	12	30443293,30444343,30445261,30445516,30449240,30450310,30452571,30453243,30453510,30455009,30456755,30510651,	30443392,30444457,30445393,30445591,30449357,30450376,30452703,30453379,30453633,30455144,30457062,30510957,	0	ENSDARG00000099758.3	cmpl	cmpl	0,0,0,0,0,0,0,2,2,2,0,-1,
ENSDART00000157924.2	chr1	-	30453541	30457062	30453541	30456937	3	30453541,30455009,30456755,	30453633,30455144,30457062,	0	ENSDARG00000099758.3	incmpl	cmpl	2,2,0,
ENSDART00000161380.2	chr1	-	30455017	30457062	30455017	30456937	2	30455017,30456755,	30455144,30457062,	0	ENSDARG00000099758.3	incmpl	cmpl	2,0,
ENSDART00000144297.3	chr1	-	30539970	30568225	30540548	30568073	9	30539970,30541228,30546895,30548886,30549590,30557529,30559372,30563121,30568039,	30540656,30541357,30547150,30548934,30549714,30557636,30559492,30563249,30568225,	0	ENSDARG00000093065.3	cmpl	cmpl	0,0,0,0,2,0,0,1,0,
ENSDART00000164204.2	chr1	-	30539981	30568225	30540548	30568070	10	30539981,30540189,30541228,30546895,30548886,30549590,30557529,30559372,30563121,30568039,	30540154,30540656,30541357,30547150,30548934,30549714,30557636,30559492,30563249,30568225,	0	ENSDARG00000093065.3	cmpl	cmpl	-1,0,0,0,0,2,0,0,1,0,
ENSDART00000112778.4	chr1	+	30551776	30554973	30553872	30554973	2	30551776,30553851,	30552405,30554973,	0	ENSDARG00000074302.6	cmpl	cmpl	-1,0,
ENSDART00000018827.9	chr1	-	30585139	30689004	30585809	30688785	11	30585139,30589244,30594101,30606150,30606389,30618479,30619515,30621933,30640964,30649078,30688237,	30585847,30589310,30594245,30606298,30606535,30618614,30619651,30622106,30641090,30649194,30689004,	0	ENSDARG00000003142.9	cmpl	cmpl	1,1,1,0,1,1,0,1,1,2,0,
ENSDART00000135617.2	chr1	-	30589242	30612490	30612490	30612490	5	30589242,30594101,30606150,30606389,30612243,	30589310,30594245,30606298,30606535,30612490,	0	ENSDARG00000003142.9	none	none	-1,-1,-1,-1,-1,
ENSDART00000124561.3	chr1	-	30618479	30641536	30641536	30641536	5	30618479,30619515,30621933,30640964,30641390,	30618614,30619651,30622106,30641090,30641536,	0	ENSDARG00000003142.9	none	none	-1,-1,-1,-1,-1,
ENSDART00000152175.2	chr1	-	30718245	30723241	30718554	30723056	3	30718245,30720196,30723004,	30718584,30720342,30723241,	0	ENSDARG00000096668.2	cmpl	cmpl	0,1,0,
ENSDART00000152150.2	chr1	-	30719816	30723258	30720085	30723056	2	30719816,30723004,	30720342,30723258,	0	ENSDARG00000096668.2	cmpl	cmpl	1,0,
ENSDART00000143897.3	chr1	+	30723379	30727619	30727619	30727619	7	30723379,30723676,30725564,30725901,30726285,30726440,30727574,	30723465,30723856,30725804,30725983,30726339,30726497,30727619,	0	ENSDARG00000042688.9	none	none	-1,-1,-1,-1,-1,-1,-1,
ENSDART00000127943.4	chr1	+	30723379	30728007	30723703	30728007	9	30723379,30723676,30725564,30725758,30725901,30726285,30726440,30727574,30727931,	30723465,30723856,30725671,30725804,30725983,30726339,30726497,30727804,30728007,	0	ENSDARG00000042688.9	cmpl	incmpl	-1,0,0,2,0,1,1,1,0,
ENSDART00000062628.8	chr1	+	30723457	30734796	30723703	30734108	12	30723457,30723676,30725564,30725758,30725901,30726285,30726440,30727574,30727931,30730350,30733808,30734087,	30723569,30723856,30725671,30725804,30725983,30726339,30726497,30727804,30728085,30730961,30733949,30734796,	0	ENSDARG00000042688.9	cmpl	cmpl	-1,0,0,2,0,1,1,1,0,1,0,0,
ENSDART00000127670.3	chr1	+	30723460	30734363	30723703	30734108	12	30723460,30723676,30725564,30725758,30725901,30726285,30726440,30727574,30727931,30730350,30733808,30734087,	30723541,30723856,30725671,30725804,30725983,30726339,30726497,30727804,30728085,30730961,30733949,30734363,	0	ENSDARG00000042688.9	cmpl	cmpl	-1,0,0,2,0,1,1,1,0,1,0,0,
ENSDART00000177900.2	chr1	+	30723676	30735478	30723703	30734108	11	30723676,30725564,30725758,30725901,30726285,30726440,30727574,30727931,30730350,30733808,30734087,	30723856,30725671,30725804,30725983,30726339,30726497,30727804,30728085,30730961,30733949,30735478,	0	ENSDARG00000042688.9	cmpl	cmpl	0,0,2,0,1,1,1,0,1,0,0,
ENSDART00000085454.6	chr1	-	30736448	30762264	30736782	30762204	21	30736448,30741648,30741872,30742241,30744342,30747098,30749124,30749308,30749538,30749753,30751363,30751562,30751765,30752946,30754880,30755245,30755507,30755767,30757169,30757507,30761985,	30736851,30741771,30742031,30742410,30744557,30747255,30749211,30749436,30749623,30749818,30751465,30751679,30751912,30753084,30754997,30755407,30755675,30755841,30757363,30757665,30762264,	0	ENSDARG00000060559.6	cmpl	cmpl	0,0,0,2,0,2,2,0,2,0,0,0,0,0,0,0,0,1,2,0,0,
ENSDART00000152279.2	chr1	-	30736569	30762254	30762254	30762254	4	30736569,30757301,30757507,30761985,	30736837,30757363,30757665,30762254,	0	ENSDARG00000060559.6	none	none	-1,-1,-1,-1,
ENSDART00000156118.2	chr1	-	30829996	30831196	30831196	30831196	1	30829996,	30831196,	0	ENSDARG00000114316.1	none	none	-1,
ENSDART00000154360.2	chr1	-	30840215	30841415	30841415	30841415	1	30840215,	30841415,	0	ENSDARG00000114817.1	none	none	-1,
ENSDART00000152541.2	chr1	+	30853968	30857925	30857925	30857925	1	30853968,	30857925,	0	ENSDARG00000096527.3	none	none	-1,
ENSDART00000139807.2	chr1	-	30919335	30923141	30923141	30923141	2	30919335,30922645,	30919670,30923141,	0	ENSDARG00000092278.2	none	none	-1,-1,
ENSDART00000022841.8	chr1	+	30946230	30974165	30946249	30974082	10	30946230,30955856,30956100,30956362,30962529,30962680,30964956,30966384,30966531,30974003,	30946289,30956023,30956250,30956511,30962572,30962844,30965054,30966432,30966610,30974165,	0	ENSDARG00000019715.9	cmpl	cmpl	0,1,0,0,2,0,2,1,1,2,
ENSDART00000149561.2	chr1	+	30955924	30965004	30955924	30962726	5	30955924,30956100,30956362,30962680,30964956,	30956023,30956250,30956511,30962844,30965004,	0	ENSDARG00000019715.9	incmpl	cmpl	0,0,0,2,-1,
ENSDART00000008469.9	chr1	-	30977935	30979707	30978481	30979563	3	30977935,30978931,30979244,	30978808,30979116,30979707,	0	ENSDARG00000017174.9	cmpl	cmpl	0,1,0,
ENSDART00000102210.5	chr1	+	31019164	31064706	31019241	31063787	25	31019164,31034218,31034422,31036515,31038366,31041312,31042049,31042376,31042553,31043223,31043402,31043566,31050741,31052321,31052973,31053504,31054409,31054706,31054873,31056950,31057244,31059976,31061322,31061544,31063622,	31019414,31034346,31034502,31036777,31038498,31041526,31042243,31042465,31042681,31043319,31043464,31043730,31050888,31052437,31053127,31053588,31054489,31054784,31054976,31057124,31057343,31060087,31061421,31061670,31064706,	0	ENSDARG00000069946.6	cmpl	cmpl	0,2,1,0,1,1,2,1,0,2,2,1,0,0,2,0,0,2,2,0,0,0,0,0,0,
ENSDART00000150169.2	chr1	+	31054414	31055182	31055182	31055182	2	31054414,31054706,	31054489,31055182,	0	ENSDARG00000069946.6	none	none	-1,-1,
ENSDART00000148968.3	chr1	+	31054914	31063778	31054914	31062422	8	31054914,31056950,31057244,31059976,31061322,31061544,31062359,31063622,	31054976,31057124,31057343,31060087,31061421,31061670,31062453,31063778,	0	ENSDARG00000069946.6	incmpl	cmpl	1,0,0,0,0,0,0,-1,
ENSDART00000148844.2	chr1	+	31057239	31063850	31057239	31062422	6	31057239,31059976,31061322,31061544,31062359,31063622,	31057343,31060087,31061421,31061670,31062564,31063850,	0	ENSDARG00000069946.6	incmpl	cmpl	1,0,0,0,0,-1,
ENSDART00000132466.5	chr1	-	31071707	31105376	31072712	31104125	18	31071707,31074981,31083132,31083489,31085707,31085865,31088618,31088977,31090469,31090777,31091083,31091219,31091452,31091968,31093564,31093806,31102262,31105257,	31072889,31075170,31083337,31083561,31085765,31086190,31088773,31089113,31090566,31091007,31091137,31091366,31091672,31092073,31093685,31093939,31104289,31105376,	0	ENSDARG00000074575.7	cmpl	cmpl	0,0,2,2,1,0,1,0,2,0,0,0,2,2,1,0,0,-1,
ENSDART00000138113.2	chr1	-	31072817	31083535	31072817	31083535	5	31072817,31074981,31079720,31083132,31083489,	31072889,31075170,31079837,31083337,31083535,	0	ENSDARG00000074575.7	incmpl	incmpl	0,0,0,2,1,
ENSDART00000137863.3	chr1	+	31110816	31130222	31113967	31129583	9	31110816,31112407,31113938,31117270,31117533,31118647,31119150,31122464,31129458,	31110852,31112538,31114111,31117450,31117830,31118798,31119407,31122699,31130222,	0	ENSDARG00000069951.6	cmpl	cmpl	-1,-1,0,0,0,0,1,0,1,
ENSDART00000075340.5	chr1	+	31112435	31130222	31113967	31129583	8	31112435,31113938,31117270,31117533,31118647,31119150,31122464,31129458,	31112538,31114111,31117450,31117830,31118798,31119407,31122699,31130222,	0	ENSDARG00000069951.6	cmpl	cmpl	-1,0,0,0,0,1,0,1,
ENSDART00000129362.2	chr1	+	31113950	31129604	31113967	31129583	7	31113950,31117270,31117533,31118647,31119150,31122464,31129458,	31114111,31117450,31117830,31118798,31119407,31122699,31129604,	0	ENSDARG00000069951.6	cmpl	cmpl	0,0,0,0,1,0,1,
ENSDART00000085370.7	chr1	-	31134941	31350148	31135678	31349751	14	31134941,31139997,31146262,31149020,31154292,31161038,31161892,31166199,31166787,31170680,31171017,31180649,31188727,31349398,	31136812,31140124,31146394,31149129,31154513,31161065,31161987,31166295,31166898,31170806,31171193,31180776,31188818,31350148,	0	ENSDARG00000069953.8	cmpl	cmpl	0,2,2,1,2,2,0,0,0,0,1,0,2,0,
ENSDART00000172243.2	chr1	-	31135678	31140096	31135678	31140096	2	31135678,31139997,	31136812,31140096,	0	ENSDARG00000069953.8	cmpl	cmpl	0,0,
ENSDART00000148229.2	chr1	+	31141316	31144527	31144527	31144527	2	31141316,31143998,	31141380,31144527,	0	ENSDARG00000093358.2	none	none	-1,-1,
ENSDART00000190294.1	chr1	-	31166178	31171242	31166178	31171242	4	31166178,31166787,31170680,31171017,	31166295,31166898,31170806,31171242,	0	ENSDARG00000069953.8	cmpl	cmpl	0,0,0,0,
ENSDART00000139915.2	chr1	-	31288535	31296246	31296246	31296246	2	31288535,31296183,	31288759,31296246,	0	ENSDARG00000094957.2	none	none	-1,-1,
ENSDART00000087115.6	chr1	-	31374750	31505144	31374750	31505144	28	31374750,31378658,31378955,31380475,31386183,31399498,31400632,31403931,31414330,31414398,31415470,31420853,31421353,31422957,31428064,31429756,31430548,31431085,31434864,31435373,31437448,31439372,31439642,31445447,31449174,31449347,31471915,31504977,	31374975,31378798,31379057,31380582,31386385,31399616,31400748,31403971,31414386,31414457,31415554,31420916,31421467,31423111,31428218,31429928,31430679,31431204,31434911,31435497,31437548,31439483,31439683,31446310,31449320,31449443,31472129,31505144,	0	ENSDARG00000078902.7	cmpl	cmpl	0,1,1,2,1,0,1,0,1,2,2,2,2,1,0,2,0,1,2,1,0,0,1,2,0,0,2,0,
ENSDART00000146567.3	chr1	-	31508738	31516112	31509027	31516016	10	31508738,31509376,31509529,31511537,31512097,31512340,31514573,31514717,31515617,31516013,	31509183,31509433,31509665,31511633,31512180,31512387,31514637,31514774,31515746,31516112,	0	ENSDARG00000039616.8	cmpl	cmpl	0,0,2,2,0,1,0,0,0,0,
ENSDART00000134158.2	chr1	-	31508777	31512164	31512164	31512164	4	31508777,31509376,31511537,31512097,	31509183,31509665,31511633,31512164,	0	ENSDARG00000039616.8	none	none	-1,-1,-1,-1,
ENSDART00000190886.1	chr1	-	31509027	31515746	31509027	31515746	9	31509027,31509376,31509529,31511537,31512097,31512340,31514573,31514717,31515617,	31509183,31509433,31509665,31511633,31512180,31512387,31514637,31514774,31515746,	0	ENSDARG00000039616.8	cmpl	incmpl	0,0,2,2,0,1,0,0,0,
ENSDART00000139828.2	chr1	-	31509529	31516091	31511111	31516016	9	31509529,31511106,31511537,31512097,31512340,31514573,31514717,31515617,31516013,	31509665,31511142,31511633,31512180,31512387,31514637,31514774,31515746,31516091,	0	ENSDARG00000039616.8	cmpl	cmpl	-1,2,2,0,1,0,0,0,0,
ENSDART00000146891.2	chr1	-	31514640	31516081	31516081	31516081	2	31514640,31515617,	31514774,31516081,	0	ENSDARG00000039616.8	none	none	-1,-1,
ENSDART00000149401.3	chr1	+	31519238	31520972	31520972	31520972	6	31519238,31519594,31519867,31520072,31520316,31520645,	31519323,31519667,31519955,31520202,31520459,31520972,	0	ENSDARG00000095941.3	none	none	-1,-1,-1,-1,-1,-1,
ENSDART00000007770.10	chr1	-	31531989	31534089	31532559	31533838	2	31531989,31533525,	31533044,31534089,	0	ENSDARG00000018611.11	cmpl	cmpl	1,0,
ENSDART00000075286.5	chr1	+	31573224	31598417	31573354	31598207	12	31573224,31576725,31578669,31579299,31583377,31585544,31593215,31593497,31594644,31595823,31596268,31597949,	31573396,31576824,31578830,31579424,31583523,31585677,31593403,31593608,31594746,31595899,31596396,31598417,	0	ENSDARG00000053269.6	cmpl	cmpl	0,0,0,2,1,0,1,0,0,0,1,0,
ENSDART00000057885.8	chr1	+	31638273	31643502	31638757	31642304	5	31638273,31638880,31640060,31641571,31642028,	31638789,31638917,31640247,31641678,31643502,	0	ENSDARG00000039615.8	cmpl	cmpl	0,2,0,1,0,
ENSDART00000182908.1	chr1	+	31643222	31669901	31643222	31669901	8	31643222,31645485,31651227,31652119,31656658,31662656,31663084,31669877,	31643264,31645500,31651254,31652129,31656688,31662677,31663092,31669901,	0	ENSDARG00000039615.8	incmpl	incmpl	0,0,0,0,1,1,1,0,
ENSDART00000085309.6	chr1	-	31654202	31657854	31654407	31657634	6	31654202,31654821,31656617,31656860,31657064,31657570,	31654512,31654924,31656751,31656976,31657145,31657854,	0	ENSDARG00000060501.7	cmpl	cmpl	0,2,0,1,1,0,
ENSDART00000142296.2	chr1	-	31654263	31657644	31654487	31657634	5	31654263,31656617,31656860,31657064,31657570,	31654512,31656751,31656976,31657145,31657644,	0	ENSDARG00000060501.7	cmpl	cmpl	2,0,1,1,0,
ENSDART00000057880.5	chr1	+	31657841	31672343	31658016	31672027	9	31657841,31657992,31659928,31660885,31661087,31662805,31664805,31667365,31671665,	31657902,31658137,31660226,31661009,31661411,31662979,31664934,31667534,31672343,	0	ENSDARG00000039613.7	cmpl	cmpl	-1,0,1,2,0,0,0,0,1,
ENSDART00000192203.1	chr1	+	31658010	31672027	31658016	31672027	8	31658010,31659928,31660885,31661087,31662805,31664805,31667365,31671665,	31658137,31660226,31661009,31661411,31662979,31664934,31667534,31672027,	0	ENSDARG00000039613.7	cmpl	cmpl	0,1,2,0,0,0,0,1,
ENSDART00000044214.6	chr1	+	31674296	31699955	31674503	31699628	4	31674296,31686486,31690003,31698948,	31674563,31686589,31690165,31699955,	0	ENSDARG00000029751.6	cmpl	cmpl	0,0,1,1,
ENSDART00000057879.7	chr1	+	31706667	31722875	31706685	31722729	11	31706667,31706959,31707173,31709459,31711806,31712119,31712301,31712832,31715624,31716381,31722624,	31706702,31706996,31707301,31709610,31711943,31712189,31712383,31712964,31715767,31716513,31722875,	0	ENSDARG00000027572.9	cmpl	cmpl	0,2,0,2,0,2,0,1,1,0,0,
ENSDART00000144957.2	chr1	+	31706668	31722875	31722875	31722875	10	31706668,31707173,31709459,31711806,31712119,31712301,31712832,31715624,31716381,31722624,	31706996,31707301,31709610,31711943,31712189,31712383,31712964,31715767,31716513,31722875,	0	ENSDARG00000027572.9	none	none	-1,-1,-1,-1,-1,-1,-1,-1,-1,-1,
ENSDART00000112333.6	chr1	+	31725153	31799359	31725300	31797578	7	31725153,31778992,31782580,31789098,31789501,31793873,31797365,	31726786,31779136,31782718,31789268,31789595,31794052,31799359,	0	ENSDARG00000078733.6	cmpl	cmpl	0,1,1,1,0,1,0,
ENSDART00000189801.1	chr1	+	31725300	31779857	31725300	31779243	2	31725300,31778992,	31726786,31779857,	0	ENSDARG00000078733.6	cmpl	cmpl	0,1,
ENSDART00000152232.3	chr1	-	31809172	31856630	31856630	31856630	18	31809172,31813210,31814769,31817554,31818185,31818781,31821145,31821337,31823455,31823622,31830281,31831039,31833910,31834088,31834294,31846909,31853441,31856498,	31809570,31813387,31814830,31817606,31818356,31818848,31821253,31821379,31823539,31823676,31830521,31831097,31834002,31834184,31834412,31846983,31853565,31856630,	0	ENSDARG00000058231.7	none	none	-1,-1,-1,-1,-1,-1,-1,-1,-1,-1,-1,-1,-1,-1,-1,-1,-1,-1,
ENSDART00000152493.2	chr1	-	31809172	31856676	31856676	31856676	18	31809172,31813210,31814769,31817554,31818185,31818781,31821145,31821337,31823455,31823622,31830281,31830938,31833910,31834088,31834294,31846909,31853441,31856498,	31809570,31813387,31814830,31817606,31818356,31818848,31821253,31821379,31823539,31823676,31830521,31831097,31834002,31834184,31834412,31846983,31853565,31856676,	0	ENSDARG00000058231.7	none	none	-1,-1,-1,-1,-1,-1,-1,-1,-1,-1,-1,-1,-1,-1,-1,-1,-1,-1,
ENSDART00000065125.7	chr1	-	31809184	31856622	31809333	31853545	18	31809184,31813210,31814769,31817554,31818185,31818781,31821145,31821337,31823455,31823622,31830281,31831039,31833910,31834088,31834294,31846909,31853441,31856498,	31809570,31813387,31814830,31817606,31818356,31818848,31821253,31821379,31823539,31823676,31830375,31831097,31834002,31834184,31834412,31846983,31853565,31856622,	0	ENSDARG00000058231.7	cmpl	cmpl	0,0,2,1,1,0,0,0,0,0,2,1,2,2,1,2,0,-1,
ENSDART00000152234.2	chr1	-	31852992	31856641	31856641	31856641	2	31852992,31856498,	31853565,31856641,	0	ENSDARG00000058231.7	none	none	-1,-1,
ENSDART00000075260.6	chr1	+	31864403	31867717	31864490	31867242	3	31864403,31866672,31866989,	31865522,31866797,31867717,	0	ENSDARG00000053248.6	cmpl	cmpl	0,0,2,
ENSDART00000007522.10	chr1	+	31942960	31979510	31943047	31979164	14	31942960,31947624,31960795,31962216,31967123,31968090,31968770,31971673,31971963,31973517,31974109,31975463,31978155,31979114,	31943227,31947672,31960858,31962439,31967308,31968220,31968967,31971815,31972080,31973606,31974281,31975681,31978300,31979510,	0	ENSDARG00000012896.10	cmpl	cmpl	0,0,0,0,1,0,1,0,1,1,0,1,0,1,
ENSDART00000168045.2	chr1	+	32013687	32014487	32014051	32014279	1	32013687,	32014487,	0	ENSDARG00000100996.2	incmpl	cmpl	0,
ENSDART00000152700.2	chr1	+	32017436	32018115	32018115	32018115	1	32017436,	32018115,	0	ENSDARG00000096540.2	none	none	-1,
ENSDART00000146602.3	chr1	+	32051580	32077473	32053075	32077192	10	32051580,32053067,32053576,32055028,32064891,32067739,32071480,32073977,32074424,32076803,	32051700,32053224,32053698,32055151,32065306,32067876,32071618,32074137,32074546,32077473,	0	ENSDARG00000053241.8	cmpl	cmpl	-1,0,2,1,1,2,1,1,2,1,
ENSDART00000148611.2	chr1	+	32051612	32065030	32065030	32065030	5	32051612,32053184,32053576,32055028,32064891,	32051700,32053224,32053698,32055151,32065030,	0	ENSDARG00000053241.8	none	none	-1,-1,-1,-1,-1,
ENSDART00000181442.1	chr1	+	32054158	32074141	32054973	32074141	5	32054158,32064891,32067739,32071480,32073977,	32055151,32065306,32067876,32071618,32074141,	0	ENSDARG00000053241.8	cmpl	cmpl	0,1,2,1,1,
ENSDART00000112639.5	chr1	-	32097178	32111882	32097502	32111621	7	32097178,32098291,32099447,32101272,32109315,32111444,32111837,	32097634,32098444,32099513,32101408,32109410,32111626,32111882,	0	ENSDARG00000069834.6	cmpl	cmpl	0,0,0,2,0,0,-1,
ENSDART00000101958.4	chr1	-	32101083	32111924	32101242	32111621	4	32101083,32109315,32111444,32111837,	32101408,32109410,32111626,32111924,	0	ENSDARG00000069834.6	cmpl	cmpl	2,0,0,-1,
ENSDART00000152552.2	chr1	-	32316334	32318911	32318911	32318911	5	32316334,32317224,32317406,32318011,32318855,	32316940,32317317,32317444,32318129,32318911,	0	ENSDARG00000096548.2	none	none	-1,-1,-1,-1,-1,
ENSDART00000137156.3	chr1	+	32341483	32385665	32341761	32385227	4	32341483,32342090,32342484,32385050,	32341816,32342309,32342714,32385665,	0	ENSDARG00000027826.10	cmpl	cmpl	0,1,1,0,
ENSDART00000135078.2	chr1	+	32341733	32342951	32341761	32342723	3	32341733,32342090,32342484,	32341816,32342309,32342951,	0	ENSDARG00000027826.10	cmpl	cmpl	0,1,1,
ENSDART00000178955.2	chr1	+	32513988	32514104	32514104	32514104	1	32513988,	32514104,	0	ENSDARG00000107292.2	none	none	-1,
ENSDART00000113818.4	chr1	+	32521468	32693950	32528096	32691706	7	32521468,32527804,32560950,32577144,32655190,32668687,32690817,	32521875,32528559,32561004,32577297,32655376,32669477,32693950,	0	ENSDARG00000079455.5	cmpl	cmpl	-1,0,1,1,1,1,2,
ENSDART00000152580.3	chr1	+	32521578	32693355	32528096	32691706	6	32521578,32527804,32577144,32655190,32668687,32690817,	32521875,32528559,32577297,32655376,32669477,32693355,	0	ENSDARG00000079455.5	cmpl	cmpl	-1,0,1,1,1,2,
ENSDART00000128317.3	chr1	+	32528096	32691706	32528096	32691706	6	32528096,32560953,32577144,32655190,32668687,32690817,	32528559,32561004,32577297,32655376,32669477,32691706,	0	ENSDARG00000079455.5	cmpl	cmpl	0,1,1,1,1,2,
ENSDART00000125782.2	chr1	+	32706108	32706227	32706227	32706227	1	32706108,	32706227,	0	ENSDARG00000089053.2	none	none	-1,
ENSDART00000109369.2	chr1	+	32791919	32793644	32791919	32793644	7	32791919,32792108,32792284,32792574,32792932,32793187,32793474,	32791986,32792185,32792465,32792808,32793104,32793336,32793644,	0	ENSDARG00000078810.2	cmpl	cmpl	0,1,0,1,1,2,1,
ENSDART00000185961.1	chr1	-	33001558	33001673	33001673	33001673	1	33001558,	33001673,	0	ENSDARG00000115601.1	none	none	-1,
ENSDART00000135926.2	chr1	+	33215240	33216718	33216718	33216718	4	33215240,33215381,33215999,33216221,	33215283,33215488,33216090,33216718,	0	ENSDARG00000094318.3	none	none	-1,-1,-1,-1,
ENSDART00000149792.2	chr1	+	33215242	33216083	33216083	33216083	3	33215242,33215381,33215999,	33215283,33215651,33216083,	0	ENSDARG00000094318.3	none	none	-1,-1,-1,
ENSDART00000136761.3	chr1	+	33217910	33283689	33218451	33280447	8	33217910,33239965,33244936,33257662,33269105,33273919,33277462,33280321,	33218614,33240134,33245200,33257782,33269201,33273977,33277540,33283689,	0	ENSDARG00000060716.7	cmpl	cmpl	0,1,2,2,2,2,0,0,
ENSDART00000140435.3	chr1	+	33322173	33324476	33322584	33324476	4	33322173,33322554,33323794,33324101,	33322466,33322763,33323924,33324476,	0	ENSDARG00000074815.6	cmpl	incmpl	-1,0,2,0,
ENSDART00000113486.4	chr1	+	33322554	33334732	33322584	33332061	6	33322554,33323794,33324101,33324726,33328856,33330152,	33322763,33323924,33324492,33328746,33329778,33334732,	0	ENSDARG00000074815.6	cmpl	cmpl	0,2,0,1,1,2,
ENSDART00000137151.2	chr1	+	33328856	33332061	33328856	33332061	2	33328856,33330152,	33329778,33332061,	0	ENSDARG00000074815.6	incmpl	cmpl	1,2,
ENSDART00000178996.2	chr1	-	33336922	33351780	33337724	33351339	8	33336922,33339198,33341733,33344404,33344764,33348282,33350769,33351139,	33337850,33339318,33341886,33344624,33344891,33348445,33350944,33351780,	0	ENSDARG00000033380.7	cmpl	cmpl	0,0,0,2,1,0,2,0,
ENSDART00000041191.6	chr1	-	33337462	33353778	33337724	33353618	9	33337462,33339198,33341733,33344404,33344764,33348282,33350769,33351139,33353611,	33337850,33339318,33341886,33344624,33344891,33348445,33350944,33351278,33353778,	0	ENSDARG00000033380.7	cmpl	cmpl	0,0,0,2,1,0,2,1,0,
ENSDART00000181515.1	chr1	-	33353173	33380340	33356467	33379836	13	33353173,33356988,33357719,33366344,33366508,33372642,33374038,33374635,33375076,33375718,33375881,33376107,33379772,	33356496,33357039,33357827,33366365,33366544,33372723,33374086,33374668,33375100,33375748,33375932,33376152,33380340,	0	ENSDARG00000051975.8	cmpl	cmpl	1,1,1,1,1,1,1,1,1,1,1,1,0,
ENSDART00000136383.3	chr1	-	33355397	33380024	33356467	33379836	15	33355397,33356988,33357719,33366344,33366508,33372642,33374038,33374635,33375076,33375453,33375718,33375881,33376107,33379772,33379939,	33356496,33357039,33357827,33366365,33366544,33372723,33374086,33374668,33375100,33375495,33375748,33375932,33376152,33379837,33380024,	0	ENSDARG00000051975.8	cmpl	cmpl	1,1,1,1,1,1,1,1,1,1,1,1,1,0,-1,
ENSDART00000141347.2	chr1	-	33356174	33380011	33356467	33379836	14	33356174,33356988,33357719,33366344,33366508,33372642,33374038,33374635,33375076,33375718,33375881,33376107,33379772,33379939,	33356496,33357039,33357827,33366365,33366544,33372723,33374086,33374668,33375100,33375748,33375932,33376152,33379837,33380011,	0	ENSDARG00000051975.8	cmpl	cmpl	1,1,1,1,1,1,1,1,1,1,1,1,0,-1,
ENSDART00000146648.3	chr1	-	33365182	33379968	33379968	33379968	13	33365182,33366344,33366508,33372642,33374038,33374635,33375076,33375453,33375718,33375881,33376107,33379772,33379939,	33365657,33366365,33366544,33372723,33374086,33374668,33375100,33375495,33375748,33375932,33376152,33379837,33379968,	0	ENSDARG00000051975.8	none	none	-1,-1,-1,-1,-1,-1,-1,-1,-1,-1,-1,-1,-1,
ENSDART00000136097.3	chr1	-	33365308	33379991	33379991	33379991	12	33365308,33366344,33366508,33372642,33374038,33374635,33375076,33375718,33375881,33376107,33379772,33379939,	33365657,33366365,33366544,33372723,33374086,33374668,33375100,33375748,33375932,33376152,33379837,33379991,	0	ENSDARG00000051975.8	none	none	-1,-1,-1,-1,-1,-1,-1,-1,-1,-1,-1,-1,
ENSDART00000138633.3	chr1	-	33375206	33379972	33379972	33379972	5	33375206,33375881,33376107,33379772,33379939,	33375748,33375932,33376152,33379837,33379972,	0	ENSDARG00000051975.8	none	none	-1,-1,-1,-1,-1,
ENSDART00000141107.2	chr1	-	33375491	33379994	33379994	33379994	4	33375491,33376107,33379772,33379939,	33375932,33376152,33379837,33379994,	0	ENSDARG00000051975.8	none	none	-1,-1,-1,-1,
ENSDART00000187194.1	chr1	+	33383643	33487375	33401841	33484068	8	33383643,33401676,33403985,33409551,33449245,33457644,33468185,33483891,	33384101,33401944,33404093,33409620,33449347,33457852,33468393,33487375,	0	ENSDARG00000079280.6	cmpl	cmpl	-1,0,1,1,1,1,2,0,
ENSDART00000150043.3	chr1	+	33383970	33485932	33404038	33484068	7	33383970,33403985,33409551,33449245,33457644,33468185,33483891,	33384101,33404093,33409620,33449347,33457852,33468393,33485932,	0	ENSDARG00000079280.6	cmpl	cmpl	-1,0,1,1,1,2,0,
ENSDART00000139004.3	chr1	+	33390285	33404095	33404038	33404095	2	33390285,33403985,	33390527,33404095,	0	ENSDARG00000079280.6	cmpl	incmpl	-1,0,
ENSDART00000110026.4	chr1	+	33401773	33485934	33401841	33484068	7	33401773,33403985,33409551,33449245,33457644,33468185,33483891,	33401944,33404093,33409620,33449347,33457852,33468393,33485934,	0	ENSDARG00000079280.6	cmpl	cmpl	0,1,1,1,1,2,0,
ENSDART00000149786.3	chr1	+	33401773	33485932	33401841	33484068	6	33401773,33409551,33449245,33457644,33468185,33483891,	33401944,33409620,33449347,33457852,33468393,33485932,	0	ENSDARG00000079280.6	cmpl	cmpl	0,1,1,1,2,0,
ENSDART00000148946.2	chr1	+	33401829	33468392	33401841	33468392	6	33401829,33403985,33409551,33449245,33457644,33468185,	33401944,33404093,33409620,33449347,33457852,33468392,	0	ENSDARG00000079280.6	cmpl	incmpl	0,1,1,1,1,2,
ENSDART00000133870.3	chr1	+	33401857	33455232	33455232	33455232	5	33401857,33403985,33409551,33449245,33454965,	33401944,33404093,33409620,33449347,33455232,	0	ENSDARG00000079280.6	none	none	-1,-1,-1,-1,-1,
ENSDART00000075632.6	chr1	-	33547531	33557915	33548408	33556386	8	33547531,33549790,33553506,33554232,33555685,33555995,33556296,33557735,	33548553,33549941,33553689,33554372,33555786,33556142,33556395,33557915,	0	ENSDARG00000053586.6	cmpl	cmpl	2,1,1,2,0,0,0,-1,
ENSDART00000187346.1	chr1	-	33548387	33556428	33548408	33556386	7	33548387,33549790,33553506,33554232,33555685,33555995,33556296,	33548553,33549941,33553689,33554372,33555786,33556142,33556428,	0	ENSDARG00000053586.6	cmpl	cmpl	2,1,1,2,0,0,0,
ENSDART00000018472.8	chr1	+	33558554	33569245	33558696	33568046	6	33558554,33559148,33561496,33564603,33565329,33567932,	33558730,33559240,33561691,33564706,33565436,33569245,	0	ENSDARG00000002190.10	cmpl	cmpl	0,1,0,0,1,0,
ENSDART00000075626.5	chr1	+	33634185	33635304	33634185	33635304	1	33634185,	33635304,	0	ENSDARG00000053580.7	cmpl	cmpl	0,
ENSDART00000015547.9	chr1	-	33645043	33647169	33645336	33645966	2	33645043,33647019,	33645968,33647169,	0	ENSDARG00000003701.9	cmpl	cmpl	0,-1,
ENSDART00000192758.1	chr1	-	33645330	33645967	33645336	33645966	1	33645330,	33645967,	0	ENSDARG00000003701.9	cmpl	cmpl	0,
ENSDART00000142111.2	chr1	-	33645487	33647138	33645487	33645966	2	33645487,33647019,	33646006,33647138,	0	ENSDARG00000003701.9	incmpl	cmpl	0,-1,
ENSDART00000114384.4	chr1	+	33647681	33663705	33647692	33662584	9	33647681,33648649,33653487,33653730,33653976,33655023,33655246,33655528,33662573,	33647818,33648795,33653569,33653866,33654179,33655160,33655388,33659390,33663705,	0	ENSDARG00000079350.5	cmpl	cmpl	0,0,2,0,1,0,2,0,1,
ENSDART00000122316.4	chr1	+	33668235	33684216	33668787	33683401	5	33668235,33679401,33679575,33682817,33683101,	33668846,33679472,33679825,33682923,33684216,	0	ENSDARG00000012763.11	cmpl	cmpl	0,2,1,2,0,
ENSDART00000102184.4	chr1	+	33668243	33694795	33668787	33693755	10	33668243,33679401,33679575,33682817,33683101,33686461,33687102,33687431,33690720,33693678,	33668846,33679472,33679825,33682923,33683304,33686576,33687256,33687551,33690789,33694795,	0	ENSDARG00000012763.11	cmpl	cmpl	0,2,1,2,0,2,0,1,1,1,
ENSDART00000149105.2	chr1	+	33683230	33693904	33693904	33693904	5	33683230,33686461,33687102,33687431,33693847,	33683304,33686576,33687256,33687551,33693904,	0	ENSDARG00000012763.11	none	none	-1,-1,-1,-1,-1,
ENSDART00000131664.3	chr1	+	33697169	33722780	33697230	33722321	6	33697169,33697551,33698202,33701323,33717494,33722053,	33697341,33697664,33698561,33701478,33717616,33722780,	0	ENSDARG00000013023.12	cmpl	cmpl	0,0,2,1,0,2,
ENSDART00000141936.2	chr1	+	33697340	33701916	33701916	33701916	4	33697340,33697554,33698202,33701323,	33697341,33697664,33698561,33701916,	0	ENSDARG00000013023.12	none	none	-1,-1,-1,-1,
ENSDART00000174661.2	chr1	+	33735017	33735134	33735134	33735134	1	33735017,	33735134,	0	ENSDARG00000106311.2	none	none	-1,
ENSDART00000175840.2	chr1	+	33967156	33967273	33967273	33967273	1	33967156,	33967273,	0	ENSDARG00000115905.1	none	none	-1,
ENSDART00000042984.7	chr1	+	33969014	34200954	33969615	34199148	18	33969014,34001352,34042974,34134629,34137454,34176451,34176652,34177267,34181304,34181471,34182325,34185033,34188865,34193961,34195676,34197227,34197771,34199112,	33969691,34001417,34043641,34134785,34137790,34176576,34176815,34177376,34181375,34181597,34182511,34185095,34189075,34194111,34195870,34197377,34197880,34200954,	0	ENSDARG00000022971.10	cmpl	cmpl	0,1,0,1,1,1,0,1,2,1,1,1,0,0,0,2,2,0,
ENSDART00000146530.4	chr1	+	33969036	34201195	33969615	34199148	18	33969036,34001352,34042974,34134629,34137454,34176451,34176652,34177267,34181304,34181471,34182325,34185033,34188865,34193946,34195676,34197227,34197771,34199112,	33969691,34001417,34043641,34134785,34137790,34176576,34176815,34177376,34181375,34181597,34182511,34185095,34189075,34194111,34195870,34197377,34197880,34201195,	0	ENSDARG00000022971.10	cmpl	cmpl	0,1,0,1,1,1,0,1,2,1,1,1,0,0,0,2,2,0,
ENSDART00000117082.2	chr1	+	34122879	34122972	34122972	34122972	1	34122879,	34122972,	0	ENSDARG00000081597.2	none	none	-1,
ENSDART00000146042.2	chr1	+	34181580	34195689	34181580	34195689	6	34181580,34182325,34185033,34188865,34193961,34195676,	34181597,34182511,34185095,34189075,34194111,34195689,	0	ENSDARG00000022971.10	incmpl	incmpl	2,1,1,0,0,0,
ENSDART00000191432.1	chr1	+	34203816	34232249	34225255	34232249	9	34203816,34225232,34225490,34226135,34226307,34226505,34230225,34231783,34232212,	34203945,34225378,34225552,34226204,34226402,34226635,34230281,34231796,34232249,	0	ENSDARG00000032056.8	cmpl	cmpl	-1,0,0,2,2,1,2,1,2,
ENSDART00000046094.6	chr1	+	34203857	34233938	34225255	34232238	8	34203857,34225232,34225490,34226135,34226307,34226505,34230225,34232212,	34203945,34225378,34225552,34226204,34226402,34226635,34230281,34233938,	0	ENSDARG00000032056.8	cmpl	cmpl	-1,0,0,2,2,1,2,1,
ENSDART00000192938.1	chr1	+	34224359	34232238	34225255	34232238	7	34224359,34225490,34226135,34226307,34226505,34230225,34232212,	34225378,34225552,34226204,34226402,34226635,34230281,34232238,	0	ENSDARG00000032056.8	cmpl	cmpl	0,0,2,2,1,2,1,
ENSDART00000147201.3	chr1	+	34243649	34261993	34243719	34258692	8	34243649,34244989,34245194,34249923,34251720,34253589,34255631,34258038,	34243903,34245103,34245350,34250072,34251870,34253743,34255849,34261993,	0	ENSDARG00000074860.7	cmpl	cmpl	0,1,1,1,0,0,1,0,
ENSDART00000075584.5	chr1	+	34295924	34297403	34295976	34296792	1	34295924,	34297403,	0	ENSDARG00000053542.5	cmpl	cmpl	0,
ENSDART00000140157.2	chr1	-	34321573	34335752	34322010	34335752	3	34321573,34322233,34335613,	34322149,34322351,34335752,	0	ENSDARG00000094556.2	cmpl	incmpl	2,1,0,
ENSDART00000140515.5	chr1	-	34365844	34450784	34367301	34447560	30	34365844,34370148,34372459,34374278,34376308,34376575,34377031,34379572,34381231,34382828,34383063,34384762,34389007,34390103,34396746,34399908,34405939,34409335,34410951,34416004,34418675,34421391,34426604,34428683,34432786,34434835,34436527,34436761,34447491,34450327,	34367324,34370254,34372568,34374515,34376477,34376631,34377076,34379781,34381321,34382936,34383089,34384826,34389180,34390265,34396861,34400175,34406369,34409484,34411159,34416310,34418957,34421551,34426803,34428797,34432817,34434942,34436597,34436832,34447577,34450784,	0	ENSDARG00000053535.8	cmpl	cmpl	1,0,2,2,1,2,2,0,0,0,1,0,1,1,0,0,2,0,2,2,2,1,0,0,2,0,2,0,0,-1,
ENSDART00000143048.4	chr1	-	34366848	34447515	34367301	34447515	27	34366848,34370148,34372459,34374278,34376308,34376575,34377031,34379572,34381231,34382828,34383063,34384762,34389007,34390103,34396746,34399908,34405939,34409335,34410951,34421391,34426604,34428683,34432786,34434835,34436527,34436761,34447491,	34367324,34370254,34372568,34374515,34376477,34376631,34377076,34379781,34381321,34382936,34383089,34384826,34389180,34390265,34396861,34400175,34406369,34409484,34411159,34421551,34426803,34428797,34432817,34434942,34436597,34436832,34447515,	0	ENSDARG00000053535.8	cmpl	incmpl	1,0,2,2,1,2,2,0,0,0,1,0,1,1,0,0,2,0,2,1,0,0,2,0,2,0,0,
ENSDART00000133543.2	chr1	-	34376408	34381438	34381438	34381438	4	34376408,34376575,34379572,34381231,	34376477,34376631,34379781,34381438,	0	ENSDARG00000053535.8	none	none	-1,-1,-1,-1,
ENSDART00000180998.1	chr1	+	34400239	34400354	34400354	34400354	1	34400239,	34400354,	0	ENSDARG00000111052.1	none	none	-1,
ENSDART00000083736.4	chr1	-	34428321	34450622	34428446	34447560	8	34428321,34428683,34432786,34434835,34436527,34436761,34447491,34450327,	34428470,34428797,34432817,34434942,34436597,34436832,34447577,34450622,	0	ENSDARG00000053535.8	cmpl	cmpl	0,0,2,0,2,0,0,-1,
ENSDART00000132042.2	chr1	-	34446607	34450574	34450574	34450574	3	34446607,34447491,34450327,	34446815,34447577,34450574,	0	ENSDARG00000053535.8	none	none	-1,-1,-1,
ENSDART00000012873.8	chr1	+	34496854	34556723	34527812	34555595	6	34496854,34527796,34540252,34546137,34553090,34555401,	34497067,34527878,34540817,34546276,34553248,34556723,	0	ENSDARG00000015312.8	cmpl	cmpl	-1,0,0,1,2,1,
ENSDART00000180483.1	chr1	+	34527212	34558804	34527812	34555595	5	34527212,34540252,34546137,34553090,34555401,	34527878,34540817,34546276,34553248,34558804,	0	ENSDARG00000015312.8	cmpl	cmpl	0,0,1,2,1,
ENSDART00000004361.10	chr1	-	34593489	34612613	34597686	34612491	4	34593489,34601820,34607191,34612320,	34597865,34601880,34608071,34612613,	0	ENSDARG00000015506.11	cmpl	cmpl	1,1,0,0,
ENSDART00000157471.2	chr1	-	34612320	34685007	34616219	34684997	17	34612320,34617572,34633682,34639452,34657866,34658111,34663677,34665333,34676922,34679390,34679697,34681783,34682692,34682924,34683145,34684547,34684748,	34616273,34617731,34633767,34639583,34657969,34658202,34663828,34665499,34677021,34679516,34679879,34681892,34682826,34683044,34683344,34684648,34685007,	0	ENSDARG00000015506.11	cmpl	cmpl	0,0,2,0,2,1,0,2,2,2,0,2,0,0,2,0,0,
ENSDART00000125944.4	chr1	-	34616053	34685329	34616219	34684997	16	34616053,34617572,34657866,34658111,34663677,34665333,34676922,34679390,34679697,34681783,34682692,34682924,34683145,34684547,34684748,34685278,	34616273,34617731,34657969,34658202,34663828,34665499,34677021,34679516,34679879,34681892,34682826,34683044,34683344,34684648,34685007,34685329,	0	ENSDARG00000013006.11	cmpl	cmpl	0,0,2,1,0,2,2,2,0,2,0,0,2,0,0,-1,
ENSDART00000008277.8	chr1	-	34616055	34685329	34616219	34684997	18	34616055,34617572,34633682,34639452,34657866,34658111,34663677,34665333,34676922,34679390,34679697,34681783,34682692,34682924,34683145,34684547,34684748,34685278,	34616273,34617731,34633767,34639583,34657969,34658202,34663828,34665499,34677021,34679516,34679879,34681892,34682826,34683044,34683344,34684648,34685007,34685329,	0	ENSDARG00000013006.11	cmpl	cmpl	0,0,2,0,2,1,0,2,2,2,0,2,0,0,2,0,0,-1,
ENSDART00000178989.2	chr1	-	34668235	34668351	34668351	34668351	1	34668235,	34668351,	0	ENSDARG00000108956.2	none	none	-1,
ENSDART00000134413.2	chr1	-	34679390	34681969	34681969	34681969	3	34679390,34679697,34681783,	34679516,34679879,34681969,	0	ENSDARG00000013006.11	none	none	-1,-1,-1,
ENSDART00000037986.8	chr1	+	34685404	34694365	34685545	34694023	8	34685404,34686189,34688354,34688571,34688811,34691622,34691915,34693804,	34685624,34686319,34688477,34688712,34689070,34691787,34692017,34694365,	0	ENSDARG00000058287.7	cmpl	cmpl	0,1,2,2,2,0,0,0,
ENSDART00000149891.2	chr1	+	34685444	34688642	34685545	34686220	4	34685444,34686176,34688357,34688571,	34685624,34686319,34688477,34688642,	0	ENSDARG00000058287.7	cmpl	cmpl	0,1,-1,-1,
ENSDART00000166007.2	chr1	+	34685469	34694359	34685545	34694023	8	34685469,34686189,34688357,34688571,34688811,34691622,34691915,34693804,	34685624,34686319,34688477,34688712,34689070,34691787,34692017,34694359,	0	ENSDARG00000058287.7	cmpl	cmpl	0,1,2,2,2,0,0,0,
ENSDART00000077744.5	chr1	+	34695372	34706763	34695487	34706556	8	34695372,34695696,34695881,34695998,34701571,34702954,34703137,34706436,	34695553,34695770,34695900,34696143,34701653,34703054,34703281,34706763,	0	ENSDARG00000069910.6	cmpl	cmpl	0,0,2,0,1,2,0,0,
ENSDART00000102118.5	chr1	+	34695377	34706903	34695487	34706556	9	34695377,34695696,34695881,34695998,34701258,34701571,34702954,34703137,34706436,	34695553,34695770,34695900,34696143,34701306,34701653,34703054,34703281,34706903,	0	ENSDARG00000069910.6	cmpl	cmpl	0,0,2,0,1,1,2,0,0,
ENSDART00000135528.3	chr1	+	34695388	34706679	34695487	34706556	9	34695388,34695485,34695696,34695881,34695998,34701571,34702954,34703137,34706436,	34695422,34695553,34695770,34695900,34696143,34701653,34703054,34703281,34706679,	0	ENSDARG00000069910.6	cmpl	cmpl	-1,0,0,2,0,1,2,0,0,
ENSDART00000145535.2	chr1	+	34695513	34706470	34706470	34706470	7	34695513,34695696,34695881,34695998,34701571,34702954,34706436,	34695553,34695770,34695900,34696143,34701653,34703281,34706470,	0	ENSDARG00000069910.6	none	none	-1,-1,-1,-1,-1,-1,-1,
ENSDART00000186106.1	chr1	+	34696502	34727517	34696502	34727517	24	34696502,34696506,34699258,34700038,34700202,34704513,34704683,34705671,34705924,34707304,34707491,34709309,34709393,34712481,34712702,34712739,34715349,34717452,34717526,34718665,34719803,34720656,34722260,34727493,	34696505,34696511,34699290,34700083,34700233,34704544,34704700,34705712,34705932,34707320,34707527,34709355,34709411,34712509,34712717,34712756,34715363,34717467,34717558,34718701,34719826,34720668,34722315,34727517,	0	ENSDARG00000109513.1	incmpl	incmpl	0,0,2,1,1,2,0,2,1,0,1,1,2,2,0,0,2,1,1,0,0,2,2,0,
ENSDART00000150038.2	chr1	+	34701143	34706821	34701549	34706556	4	34701143,34702954,34703137,34706436,	34701653,34703054,34703281,34706821,	0	ENSDARG00000069910.6	cmpl	cmpl	0,2,0,0,
ENSDART00000102111.5	chr1	-	34707931	34713800	34708380	34713626	6	34707931,34708683,34710949,34711583,34712081,34713598,	34708383,34708800,34711055,34711771,34712155,34713800,	0	ENSDARG00000092693.4	cmpl	cmpl	0,0,2,0,1,0,
ENSDART00000149038.3	chr1	-	34708087	34713707	34713707	34713707	5	34708087,34708683,34710949,34711583,34713598,	34708383,34708800,34711055,34711771,34713707,	0	ENSDARG00000092693.4	none	none	-1,-1,-1,-1,-1,
ENSDART00000141569.3	chr1	-	34708226	34713710	34708380	34712147	6	34708226,34708683,34710949,34711583,34712081,34713598,	34708383,34708800,34711055,34711771,34712177,34713710,	0	ENSDARG00000092693.4	cmpl	cmpl	0,0,2,0,0,-1,
ENSDART00000138240.2	chr1	-	34708312	34713706	34711346	34713626	7	34708312,34708683,34710949,34711327,34711583,34712081,34713598,	34708383,34708800,34711055,34711392,34711771,34712155,34713706,	0	ENSDARG00000092693.4	cmpl	cmpl	-1,-1,-1,2,0,1,0,
ENSDART00000119932.2	chr1	-	34708496	34708627	34708627	34708627	1	34708496,	34708627,	0	ENSDARG00000084532.2	none	none	-1,
ENSDART00000140387.2	chr1	-	34711080	34713710	34713710	34713710	3	34711080,34712081,34713598,	34711771,34712155,34713710,	0	ENSDARG00000092693.4	none	none	-1,-1,-1,
ENSDART00000120701.2	chr1	-	34711137	34711271	34711271	34711271	1	34711137,	34711271,	0	ENSDARG00000085301.2	none	none	-1,
ENSDART00000122137.3	chr1	-	34711341	34713868	34711346	34713626	4	34711341,34711583,34712081,34713598,	34711392,34711771,34712155,34713868,	0	ENSDARG00000092693.4	cmpl	cmpl	2,0,1,0,
ENSDART00000115565.2	chr1	-	34711931	34712003	34712003	34712003	1	34711931,	34712003,	0	ENSDARG00000081849.2	none	none	-1,
ENSDART00000118605.2	chr1	-	34712512	34712583	34712583	34712583	1	34712512,	34712583,	0	ENSDARG00000082811.2	none	none	-1,
ENSDART00000189000.1	chr1	-	34743458	34748322	34748322	34748322	5	34743458,34746278,34746820,34747073,34748288,	34743553,34746533,34747055,34747117,34748322,	0	ENSDARG00000095892.2	none	none	-1,-1,-1,-1,-1,
ENSDART00000149388.2	chr1	-	34746068	34747117	34747117	34747117	2	34746068,34746278,	34746175,34747117,	0	ENSDARG00000095892.2	none	none	-1,-1,
ENSDART00000149380.2	chr1	-	34748694	34750169	34748738	34750120	4	34748694,34749462,34749708,34749945,	34749320,34749560,34749849,34750169,	0	ENSDARG00000095934.2	cmpl	cmpl	0,1,1,0,
ENSDART00000077725.6	chr1	+	34763538	34786959	34765825	34786959	6	34763538,34765497,34765819,34768829,34772409,34786814,	34763602,34765561,34765895,34769162,34772739,34786959,	0	ENSDARG00000079191.6	cmpl	incmpl	-1,-1,0,1,1,1,
ENSDART00000113808.3	chr1	+	34763542	34807059	34765825	34793727	8	34763542,34765497,34765797,34768829,34772409,34786814,34793638,34806726,	34763602,34765561,34765895,34769162,34772739,34787096,34793744,34807059,	0	ENSDARG00000079191.6	cmpl	cmpl	-1,-1,0,1,1,1,1,-1,
ENSDART00000192811.1	chr1	-	34954696	35113974	34955800	35113974	6	34954696,34956203,35112027,35112400,35113739,35113956,	34956109,34956244,35112156,35112727,35113803,35113974,	0	ENSDARG00000105033.2	cmpl	cmpl	0,1,1,1,0,0,
ENSDART00000167461.2	chr1	-	35110264	35113974	35111484	35113974	6	35110264,35111886,35112027,35112400,35113739,35113956,	35111793,35111927,35112156,35112727,35113803,35113974,	0	ENSDARG00000105033.2	cmpl	cmpl	0,1,1,1,0,0,
ENSDART00000165389.3	chr1	+	35194453	35234700	35196862	35219935	8	35194453,35196534,35196834,35199874,35203459,35211862,35219846,35232417,	35194608,35196598,35196932,35200207,35203789,35212144,35219952,35234700,	0	ENSDARG00000102858.3	cmpl	cmpl	-1,-1,0,1,1,1,1,-1,
ENSDART00000145950.3	chr1	-	35317353	35318209	35318209	35318209	3	35317353,35317815,35318165,	35317520,35317890,35318209,	0	ENSDARG00000093282.3	none	none	-1,-1,-1,
ENSDART00000169929.2	chr1	-	35332923	35335170	35335170	35335170	6	35332923,35333133,35333275,35333559,35333683,35335002,	35333044,35333174,35333401,35333605,35334010,35335170,	0	ENSDARG00000101520.2	none	none	-1,-1,-1,-1,-1,-1,
ENSDART00000163284.2	chr1	-	35332999	35335093	35335093	35335093	5	35332999,35333133,35333275,35333559,35335002,	35333044,35333174,35333401,35334010,35335093,	0	ENSDARG00000101520.2	none	none	-1,-1,-1,-1,-1,
ENSDART00000165950.2	chr1	-	35332999	35335416	35335416	35335416	6	35332999,35333133,35333275,35333559,35335002,35335213,	35333044,35333174,35333401,35334010,35335066,35335416,	0	ENSDARG00000101520.2	none	none	-1,-1,-1,-1,-1,-1,
ENSDART00000181635.1	chr1	+	35473218	35491005	35475620	35488151	10	35473218,35475567,35479484,35480014,35480959,35481687,35482436,35482669,35484258,35487989,	35473525,35476302,35479620,35480144,35481118,35481881,35482530,35482776,35485537,35491005,	0	ENSDARG00000075798.5	cmpl	cmpl	-1,0,1,2,0,0,2,0,2,0,
ENSDART00000109678.5	chr1	+	35473218	35491005	35475620	35488151	11	35473218,35475567,35479484,35480014,35480378,35480959,35481687,35482436,35482669,35484258,35487989,	35473525,35476302,35479620,35480144,35480480,35481118,35481881,35482530,35482776,35485537,35491005,	0	ENSDARG00000075798.5	cmpl	cmpl	-1,0,1,2,0,0,0,2,0,2,0,
ENSDART00000158799.2	chr1	+	35473396	35488704	35475620	35488151	10	35473396,35475567,35479484,35480014,35480378,35481663,35482436,35482669,35484258,35487989,	35473525,35476302,35479620,35480144,35480480,35481881,35482530,35482776,35485537,35488704,	0	ENSDARG00000075798.5	cmpl	cmpl	-1,0,1,2,0,0,2,0,2,0,
ENSDART00000140724.4	chr1	+	35494836	35609659	35495417	35607920	12	35494836,35495367,35561940,35577264,35582804,35586546,35587249,35590552,35597522,35598136,35601002,35607764,	35495277,35495489,35562238,35577490,35583448,35586641,35587553,35590636,35597616,35598260,35601128,35609659,	0	ENSDARG00000037018.9	cmpl	cmpl	-1,0,0,1,2,1,0,1,1,2,0,0,
ENSDART00000149806.2	chr1	+	35494903	35515273	35515273	35515273	3	35494903,35495367,35514560,	35495277,35495489,35515273,	0	ENSDARG00000037018.9	none	none	-1,-1,-1,
ENSDART00000053806.7	chr1	+	35495367	35607935	35495417	35607920	10	35495367,35561940,35577264,35582804,35586546,35587249,35597522,35598136,35601002,35607764,	35495489,35562238,35577490,35583448,35586641,35587553,35597616,35598260,35601128,35607935,	0	ENSDARG00000037018.9	cmpl	cmpl	0,0,1,2,1,0,1,2,0,0,
ENSDART00000142154.3	chr1	-	35614088	35653560	35614666	35653560	24	35614088,35615285,35617470,35617765,35618964,35619214,35620554,35620842,35623272,35623697,35624894,35625451,35627837,35628131,35628413,35628669,35629905,35630268,35632484,35633272,35633658,35636591,35648487,35648689,	35615188,35615432,35617658,35617892,35619099,35619342,35620659,35621035,35623604,35623829,35625198,35625610,35627968,35628314,35628578,35628867,35630115,35630418,35632736,35633398,35633889,35636738,35648577,35653560,	0	ENSDARG00000074677.6	cmpl	incmpl	0,0,1,0,0,1,1,0,1,1,0,0,1,1,1,1,1,1,1,1,1,1,1,2,
ENSDART00000140889.2	chr1	-	35615021	35617911	35617911	35617911	4	35615021,35615285,35617470,35617765,	35615188,35615432,35617658,35617911,	0	ENSDARG00000074677.6	none	none	-1,-1,-1,-1,
ENSDART00000176451.2	chr1	-	35662473	35695724	35678648	35695601	10	35662473,35678615,35679678,35690768,35690926,35692565,35694400,35694825,35695152,35695570,	35663804,35678701,35679873,35690849,35691020,35692645,35694436,35694978,35695353,35695724,	0	ENSDARG00000094485.5	cmpl	cmpl	-1,1,1,1,0,1,1,1,1,0,
ENSDART00000136157.3	chr1	-	35665772	35694978	35678648	35694978	8	35665772,35678615,35679678,35690768,35690926,35692565,35694400,35694825,	35665810,35678701,35679873,35690828,35691020,35692645,35694436,35694978,	0	ENSDARG00000094485.5	cmpl	incmpl	-1,1,1,1,0,1,1,1,
ENSDART00000133813.4	chr1	-	35665772	35695614	35678648	35695601	10	35665772,35678615,35679678,35690768,35690926,35692565,35694400,35694825,35695152,35695570,	35665810,35678701,35679873,35690849,35691020,35692645,35694436,35694978,35695353,35695614,	0	ENSDARG00000094485.5	cmpl	cmpl	-1,1,1,1,0,1,1,1,1,0,
ENSDART00000145291.2	chr1	-	35690954	35695615	35690954	35695601	6	35690954,35692565,35694400,35694825,35695152,35695570,	35691020,35692645,35694436,35694975,35695353,35695615,	0	ENSDARG00000094485.5	incmpl	cmpl	0,1,1,1,1,0,
ENSDART00000085051.5	chr1	+	35790081	35835863	35790491	35833780	13	35790081,35793678,35800393,35802897,35810112,35811744,35812040,35813663,35814983,35815698,35818579,35833335,35833583,	35790761,35793871,35800535,35803099,35810264,35811918,35812184,35813785,35815107,35815829,35818661,35833484,35835863,	0	ENSDARG00000060397.6	cmpl	cmpl	0,0,1,2,0,2,2,2,1,2,1,2,1,
ENSDART00000131284.2	chr1	+	35790891	35803084	35803084	35803084	4	35790891,35793678,35800393,35802897,	35791100,35793871,35800535,35803084,	0	ENSDARG00000060397.6	none	none	-1,-1,-1,-1,
ENSDART00000132118.3	chr1	+	35862549	35867943	35862674	35867943	6	35862549,35863893,35864203,35865980,35866296,35867803,	35862769,35863997,35864296,35866103,35866416,35867943,	0	ENSDARG00000094648.3	cmpl	incmpl	0,2,1,1,1,1,
ENSDART00000181541.1	chr1	-	35896487	35916247	35898416	35915782	6	35896487,35902128,35902997,35907791,35908334,35915382,	35898560,35902385,35903219,35907908,35908613,35916247,	0	ENSDARG00000027199.9	cmpl	cmpl	0,1,1,1,1,0,
ENSDART00000184424.1	chr1	-	35896487	35924495	35898416	35915782	7	35896487,35902128,35902997,35907791,35908334,35915382,35924434,	35898560,35902385,35903219,35907908,35908613,35915962,35924495,	0	ENSDARG00000027199.9	cmpl	cmpl	0,1,1,1,1,0,-1,
ENSDART00000185002.1	chr1	-	35896487	35929143	35898416	35915782	5	35896487,35902128,35902997,35915382,35928892,	35898560,35902385,35903219,35915962,35929143,	0	ENSDARG00000027199.9	cmpl	cmpl	0,1,1,0,-1,
ENSDART00000033566.8	chr1	-	35897043	35928942	35898416	35915782	7	35897043,35902128,35902997,35907791,35908334,35915382,35928892,	35898560,35902385,35903219,35907908,35908613,35915962,35928942,	0	ENSDARG00000027199.9	cmpl	cmpl	0,1,1,1,1,0,-1,
ENSDART00000180628.1	chr1	+	35949268	35954313	35949628	35954070	2	35949268,35954056,	35950544,35954313,	0	ENSDARG00000115856.1	cmpl	cmpl	0,1,
ENSDART00000085021.6	chr1	+	35956434	35970259	35959323	35969998	7	35956434,35959293,35959812,35962984,35963258,35963789,35969710,	35956615,35959717,35959935,35963155,35963344,35963939,35970259,	0	ENSDARG00000060383.8	cmpl	cmpl	-1,0,1,1,1,0,0,
ENSDART00000132932.2	chr1	+	35956460	35963062	35963062	35963062	3	35956460,35959293,35962984,	35956615,35959935,35963062,	0	ENSDARG00000060383.8	none	none	-1,-1,-1,
ENSDART00000140144.2	chr1	+	35956492	35960055	35960055	35960055	3	35956492,35959293,35959812,	35956615,35959717,35960055,	0	ENSDARG00000060383.8	none	none	-1,-1,-1,
ENSDART00000148505.2	chr1	+	35956528	35963260	35959323	35963260	4	35956528,35959293,35962984,35963258,	35956615,35959717,35963155,35963260,	0	ENSDARG00000060383.8	cmpl	incmpl	-1,0,1,1,
ENSDART00000179634.2	chr1	+	35985812	36002774	35986108	35998105	16	35985812,35987614,35989662,35989887,35990177,35991361,35991593,35991819,35992915,35993225,35993414,35993699,35993901,35995696,35995953,35998013,	35986235,35989419,35989740,35990098,35990380,35991502,35991708,35991891,35993056,35993339,35993488,35993804,35994017,35995835,35996074,36002774,	0	ENSDARG00000037002.10	cmpl	cmpl	0,1,0,0,1,0,0,1,1,1,1,0,0,2,0,1,
ENSDART00000139636.2	chr1	+	35985892	35998397	35986108	35998105	17	35985892,35987614,35989662,35989887,35990177,35990721,35991361,35991593,35991819,35992915,35993225,35993414,35993699,35993901,35995696,35995953,35998013,	35986235,35989419,35989740,35990098,35990380,35990823,35991502,35991708,35991891,35993056,35993339,35993488,35993804,35994017,35995835,35996074,35998397,	0	ENSDARG00000037002.10	cmpl	cmpl	0,1,0,0,1,0,0,0,1,1,1,1,0,0,2,0,1,
ENSDART00000175902.2	chr1	+	35985918	35990380	35986222	35990380	5	35985918,35987614,35989662,35989887,35990177,	35986235,35989419,35989740,35990098,35990380,	0	ENSDARG00000037002.10	cmpl	incmpl	0,1,0,0,1,
ENSDART00000137071.2	chr1	+	35993296	35994209	35994209	35994209	4	35993296,35993414,35993699,35993901,	35993339,35993488,35993804,35994209,	0	ENSDARG00000037002.10	none	none	-1,-1,-1,-1,
ENSDART00000037516.9	chr1	-	36017866	36151377	36022497	36151177	14	36017866,36022495,36029605,36032235,36036629,36038873,36053291,36053478,36057124,36078401,36104801,36110381,36118402,36151134,	36022149,36022546,36029783,36032433,36036968,36039011,36053392,36053533,36057364,36078629,36105300,36110554,36119614,36151377,	0	ENSDARG00000076171.6	cmpl	cmpl	-1,2,1,1,1,1,2,1,1,1,0,1,1,0,
ENSDART00000182113.1	chr1	-	36022495	36152131	36022497	36151177	13	36022495,36029605,36032235,36036629,36038873,36053291,36053478,36057124,36078401,36104801,36110381,36118402,36151134,	36022546,36029783,36032433,36036968,36039011,36053392,36053533,36057364,36078629,36105300,36110554,36119614,36152131,	0	ENSDARG00000076171.6	cmpl	cmpl	2,1,1,1,1,2,1,1,1,0,1,1,0,
ENSDART00000182904.1	chr1	-	36027469	36152131	36029601	36151177	12	36027469,36032235,36036629,36038873,36053291,36053478,36057124,36078401,36104801,36110381,36118402,36151134,	36029783,36032433,36036968,36039011,36053392,36053533,36057364,36078629,36105300,36110554,36119614,36152131,	0	ENSDARG00000076171.6	cmpl	cmpl	1,1,1,1,2,1,1,1,0,1,1,0,
ENSDART00000189284.1	chr1	+	36154260	36154377	36154377	36154377	1	36154260,	36154377,	0	ENSDARG00000112614.1	none	none	-1,
ENSDART00000187457.1	chr1	-	36188183	36218748	36188183	36218748	6	36188183,36190045,36190993,36196576,36201017,36218695,	36188203,36190060,36191006,36196584,36201025,36218748,	0	ENSDARG00000113986.1	incmpl	incmpl	1,1,0,1,2,0,
ENSDART00000053773.6	chr1	+	36194760	36204000	36195175	36203811	4	36194760,36195170,36199904,36203776,	36194822,36195269,36200018,36204000,	0	ENSDARG00000036995.6	cmpl	cmpl	-1,0,1,1,
ENSDART00000147458.2	chr1	+	36194780	36203999	36195175	36203811	4	36194780,36195170,36199904,36203776,	36195070,36195269,36200018,36203999,	0	ENSDARG00000036995.6	cmpl	cmpl	-1,0,1,1,
ENSDART00000124112.3	chr1	+	36436935	36440301	36437206	36438664	2	36436935,36437731,	36437428,36440301,	0	ENSDARG00000069737.4	cmpl	cmpl	0,0,
ENSDART00000189182.1	chr1	+	36437584	36438731	36437704	36438664	1	36437584,	36438731,	0	ENSDARG00000069737.4	cmpl	cmpl	0,
ENSDART00000135159.2	chr1	-	36447497	36472785	36447497	36471793	3	36447497,36471711,36472625,	36447571,36471918,36472785,	0	ENSDARG00000095555.2	incmpl	cmpl	1,0,-1,
ENSDART00000190784.1	chr1	+	36612659	36701206	36674622	36701206	8	36612659,36674552,36682819,36690872,36693079,36695003,36697949,36701071,	36612756,36675033,36682947,36691071,36693232,36695137,36698058,36701206,	0	ENSDARG00000011876.8	cmpl	cmpl	-1,0,0,2,0,0,2,0,
ENSDART00000187475.1	chr1	+	36651058	36701206	36674622	36701206	9	36651058,36657754,36674552,36682819,36690872,36693079,36695003,36697949,36701071,	36651236,36657927,36675033,36682947,36691071,36693232,36695137,36698058,36701206,	0	ENSDARG00000011876.8	cmpl	cmpl	-1,-1,0,0,2,0,0,2,0,
ENSDART00000125013.3	chr1	+	36665542	36690899	36690899	36690899	3	36665542,36682819,36690872,	36665778,36682947,36690899,	0	ENSDARG00000011876.8	none	none	-1,-1,-1,
ENSDART00000128557.3	chr1	+	36665554	36674695	36674622	36674695	2	36665554,36674552,	36665611,36674695,	0	ENSDARG00000011876.8	cmpl	incmpl	-1,0,
ENSDART00000010632.7	chr1	+	36665601	36702355	36674622	36701206	8	36665601,36674552,36682819,36690872,36693079,36695003,36697949,36701071,	36665778,36675033,36682947,36691071,36693232,36695137,36698058,36702355,	0	ENSDARG00000011876.8	cmpl	cmpl	-1,0,0,2,0,0,2,0,
ENSDART00000186772.1	chr1	+	36674583	36701554	36674622	36701206	7	36674583,36682819,36690872,36693079,36695003,36697949,36701071,	36675033,36682947,36691071,36693232,36695137,36698058,36701554,	0	ENSDARG00000011876.8	cmpl	cmpl	0,0,2,0,0,2,0,
ENSDART00000192274.1	chr1	+	36674655	36701206	36674655	36701206	7	36674655,36682819,36690872,36693079,36695003,36697949,36701071,	36675033,36682947,36691071,36693232,36695137,36698058,36701206,	0	ENSDARG00000011876.8	cmpl	cmpl	0,0,2,0,0,2,0,
ENSDART00000111566.4	chr1	+	36722121	36742368	36722472	36737826	10	36722121,36723938,36725018,36725345,36728278,36730526,36732666,36734666,36735066,36737527,	36722589,36724069,36725055,36725551,36728353,36730620,36732779,36734766,36735238,36742368,	0	ENSDARG00000078789.4	cmpl	cmpl	0,0,2,0,2,2,0,2,0,1,
ENSDART00000146020.2	chr1	+	36728296	36746569	36746569	36746569	3	36728296,36730526,36746257,	36728353,36730620,36746569,	0	ENSDARG00000078789.4	none	none	-1,-1,-1,
ENSDART00000053369.6	chr1	-	36746077	36772147	36746237	36770878	13	36746077,36749787,36752784,36755117,36761644,36763235,36763655,36766126,36768840,36769123,36770367,36770680,36772032,	36746513,36749910,36752938,36755802,36761828,36763428,36763765,36766229,36769008,36769360,36770516,36770883,36772147,	0	ENSDARG00000036755.8	cmpl	cmpl	0,0,2,1,0,2,0,2,2,2,0,0,-1,
ENSDART00000167831.2	chr1	-	36746237	36770883	36746237	36770878	13	36746237,36749787,36752784,36753129,36755117,36761644,36763235,36763655,36766126,36768840,36769123,36770367,36770680,	36746513,36749910,36752938,36753180,36755802,36761828,36763428,36763765,36766229,36769008,36769360,36770516,36770883,	0	ENSDARG00000036755.8	cmpl	cmpl	0,0,2,2,1,0,2,0,2,2,2,0,0,
ENSDART00000148386.2	chr1	-	36770862	36771712	36770862	36770878	2	36770862,36771521,	36770883,36771712,	0	ENSDARG00000036755.8	incmpl	cmpl	0,-1,
ENSDART00000149022.2	chr1	+	36771953	36830175	36772347	36830175	4	36771953,36823212,36823501,36830098,	36772501,36823308,36823563,36830175,	0	ENSDARG00000078326.6	cmpl	incmpl	0,1,1,0,
ENSDART00000109314.5	chr1	+	36772347	36913091	36772347	36911560	23	36772347,36823212,36823501,36830098,36830610,36836294,36838657,36840787,36841029,36841226,36842654,36844701,36844826,36845220,36856263,36857052,36860188,36867076,36878310,36887800,36903123,36908049,36911471,	36772501,36823308,36823563,36830170,36830712,36836405,36838762,36840917,36841136,36841321,36842736,36844741,36844895,36845295,36856348,36857111,36860294,36867236,36878449,36887960,36903228,36908141,36913091,	0	ENSDARG00000078326.6	cmpl	cmpl	0,1,1,0,0,0,0,0,1,0,2,0,1,1,1,2,1,2,0,1,2,2,1,
ENSDART00000148640.2	chr1	+	36911470	36912619	36911470	36911560	1	36911470,	36912619,	0	ENSDARG00000078326.6	incmpl	cmpl	0,
ENSDART00000172111.2	chr1	-	36935153	37087966	36935447	37084401	9	36935153,36938203,36952870,36957300,36963235,36969065,37000379,37082638,37087653,	36935603,36938361,36953001,36957445,36963550,36969182,37000507,37084421,37087966,	0	ENSDARG00000102082.2	cmpl	cmpl	0,1,2,1,1,1,2,0,-1,
ENSDART00000160637.2	chr1	-	36935153	37000507	36935447	37000507	7	36935153,36938203,36952870,36957300,36963235,36969065,37000379,	36935603,36938361,36953001,36957445,36963550,36969182,37000507,	0	ENSDARG00000102082.2	cmpl	incmpl	0,1,2,1,1,1,2,
ENSDART00000160056.2	chr1	-	37082638	37087966	37082638	37084401	2	37082638,37087653,	37084421,37087966,	0	ENSDARG00000102082.2	incmpl	cmpl	0,-1,
ENSDART00000117485.2	chr1	+	37123641	37123772	37123772	37123772	1	37123641,	37123772,	0	ENSDARG00000081340.2	none	none	-1,
ENSDART00000181666.1	chr1	+	37195464	37310490	37196260	37304545	17	37195464,37212047,37245616,37259360,37265186,37274930,37275435,37279693,37282144,37282664,37284262,37284498,37287278,37288866,37291875,37304260,37306387,	37196657,37212388,37245746,37259468,37265281,37275015,37275541,37279751,37282264,37282811,37284396,37284576,37287375,37288947,37291989,37304594,37310490,	0	ENSDARG00000034093.10	cmpl	cmpl	0,1,0,1,1,0,1,2,0,0,0,2,2,0,0,0,-1,
ENSDART00000043855.8	chr1	+	37195464	37305827	37196260	37304277	18	37195464,37212047,37245616,37259360,37260429,37265186,37274930,37275435,37279693,37282144,37282664,37284262,37284498,37287278,37288866,37291875,37300460,37304260,	37196657,37212388,37245746,37259468,37260486,37265281,37275015,37275541,37279751,37282264,37282811,37284396,37284576,37287375,37288947,37291989,37300473,37305827,	0	ENSDARG00000034093.10	cmpl	cmpl	0,1,0,1,1,1,0,1,2,0,0,0,2,2,0,0,0,1,
[truncated: 64,262 more rows]
